# Supplementary material for: Aspergillus nidulans gfdB, Encoding the Hyperosmotic Stress Protein Glycerol-3-phosphate Dehydrogenase, Disrupts Osmoadaptation in Aspergillus wentii
Source: MDPI journal article supplement (doi:10.3390/jof10040291), 2024-04-16
Supplement: s1 [file s1]

**Table S1** Primer pairs used in the study

*Aspergillus nidulans*

AN0351

5'-ATCCTGCCTCTTCTCTTTG-3'

5'-ACTCCTTCCTCATCCACATC-3'

AN0443

5'-GGGCGATGAGTTGTTCTG-3'

5'-TTCAGGCGGAGTAGTTGG-3'

AN1679

5'-TGTCTCTTCCTTCCCATTTTC-3'

5'-ACCATTGCCAACTTCAGTC-3'

AN2815

5'-AAACTGCTCCCGCTGACATC-3'

5'-ACGACTTTGACGCCAACCTTC-3'

AN4829

5'-CTCAACCACAACCATTCAG-3'

5'-CCCTTTTCCTTAGACCATTC-3'

AN5523

5'-CTGCCAACCACCTCCTAATG-3'

5'-GTCAACGCCTACCATAAGC-3'

AN5634

5'-GGTGGTCTTACTGCTGTGATG-3'

5'-CAATGGTGGATGTGATGAGGG-3'

AN5885

5'-CCACCCCAGCAGATTATTAC-3'

5'-TCCCCTTGATTCCCATTCC-3'

AN5975

5'-ATGAGGCTGGCTACGAAG-3'

5'-AGTGAGTGGGGTGGAAAC-3'

AN6542

5'-GAAGTCCTACGAACTGCCTGATG-3'

5'-AAGAACGCTGGGCTGGAA-3'

AN6700

5'-CCTATTCCCGAGCAAGTTC-3'

5'-TGATGTTCCCTGACGATGGC-3'

AN6792

5'-ACCGTCCCTTCCGATTCTCC-3'

5'-AGCGTCACCTTCCCGTCTG-3'

AN8639

5'-CACTCCGTCCCCTTCACTG-3'

5'-GTCGCTGCCTTGTAACCG-3'

AN8803

5'-CAACAAGGGCAACAGCAAC-3'

5'-GAGGACAGCAACATCAAGC-3'

*Aspergillus wentii*

ASPWEDRAFT\_105168

5'-CATCACCCCCCAGACATC-3'

5'-GCGACCGTCAGAGAACTTG-3'

ASPWEDRAFT\_117545

5'-ACCAAGACCATCACCAACTAC-3'

5'-GCATTCTCACAAGCAATCAC-3'

ASPWEDRAFT\_117870

5'-ATGTCGCCTCGCATTCTG-3'

5'-GGGTTGTCTCGCCATTGAG-3'

ASPWEDRAFT\_121910

5'-GCCAGGTTCAGTTTTCTTCG-3'

5'-CATATCGCCCGTCTCAATG-3'

ASPWEDRAFT\_165285

5'-TTTCCTCTTCGCCTCTTTC-3'

5'-GTCGTCAATCATCTCAATGG-3'

ASPWEDRAFT\_166217

5'-CGGTGGTCTTATTGATGC-3'

5'-TTGTCGGGGAGTGTGTAG-3'

ASPWEDRAFT\_DRAFT\_167845

5'-TACTGCCATTGCCATTGTC-3'

5'-CCTTCTTGACCTCGTTCTTG-3'

ASPWEDRAFT\_168397

5'-TCTGGTGACGGTGTTACTC-3'

5'-ATCTCCTGCTCAAAGTCG-3'

ASPWEDRAFT\_173702

5'-GATGGAGACGGTATGCTG-3'

5'-GCCTTCTTGGTATTCTTGC-3'

ASPWEDRAFT\_184430

5'-GGGAATGAAAGGGAAGTTG-3'

5'-TTGTGGAGTGGCTGAATG-3'

ASPWEDRAFT\_189665

5'-CCAAGGGAGAGACTGATG-3'

5'-GTAGGAGGAAAGCGAAAAC-3'

ASPWEDRAFT\_25409

5'-GTCCCTCTGCCCCACTTTG-3'

5'-AACGACACGCTCACCAATC-3'

ASPWEDRAFT\_33357

5'-TCTTCACGCAGGTTATCTCG-3'

5'-AGGTCTTTGGGGATGTTGG-3'

ASPWEDRAFT\_35534

5'-CAGGGTGTGCGTGTATTGG-3'

5'-GTGTTGGTGGGAGAAGTTGG-3'
