# Supplementary material for: Aspergillus nidulans gfdB, Encoding the Hyperosmotic Stress Protein Glycerol-3-phosphate Dehydrogenase, Disrupts Osmoadaptation in Aspergillus wentii
Source: MDPI journal article supplement (doi:10.3390/jof10040291), 2024-04-16
Supplement: s1 [file s1]

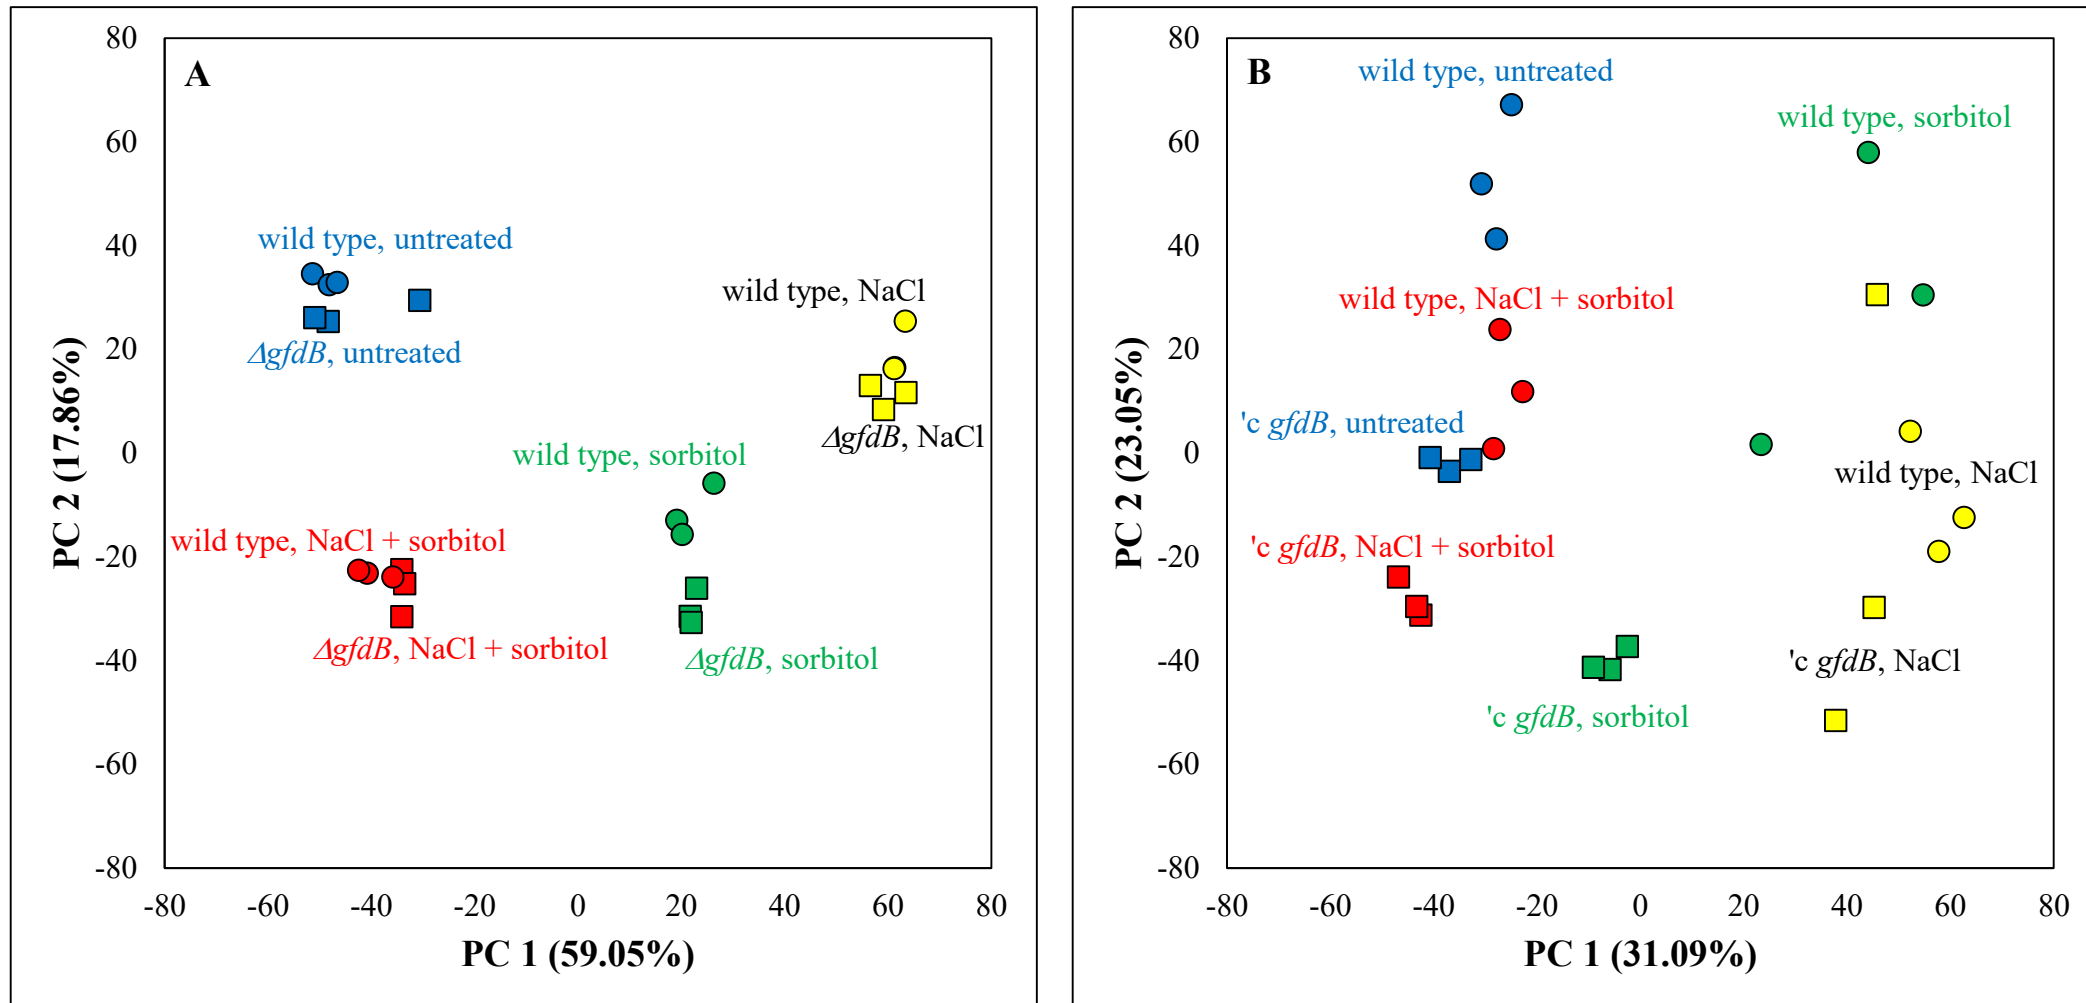

**Figure S1** Principal component (PC) analysis of the RNAseq data obtained from stress treated and untreated cultures of *A. nidulans* (A) and *A. wentii* (B) strains. The analysis was carried out using the rlog data generated by the DESeq2 software.

**A** Sorbitol vs. Untreated (1983/1494)  
*A. nidulans* THS30 (1572/1031) *A. nidulans*  $\Delta$ gfdB (1596/1255)

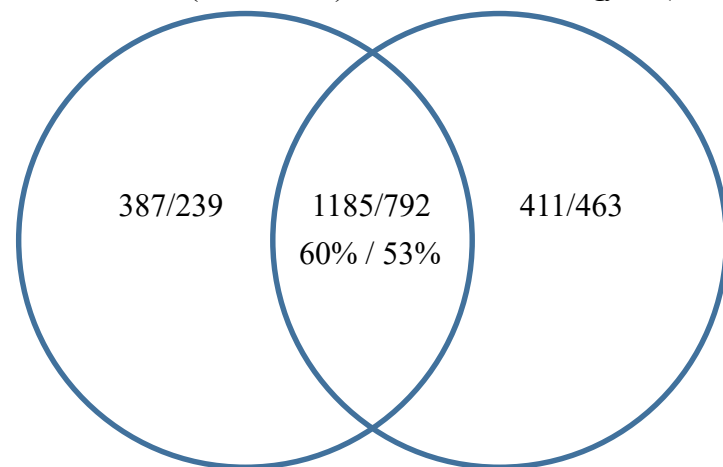

Sorbitol + NaCl vs. Untreated (1029/882)

**B** NaCl vs. Untreated (2272/1922)  
*A. nidulans* THS30 (2025/1530) *A. nidulans*  $\Delta$ gfdB (1913/1538)

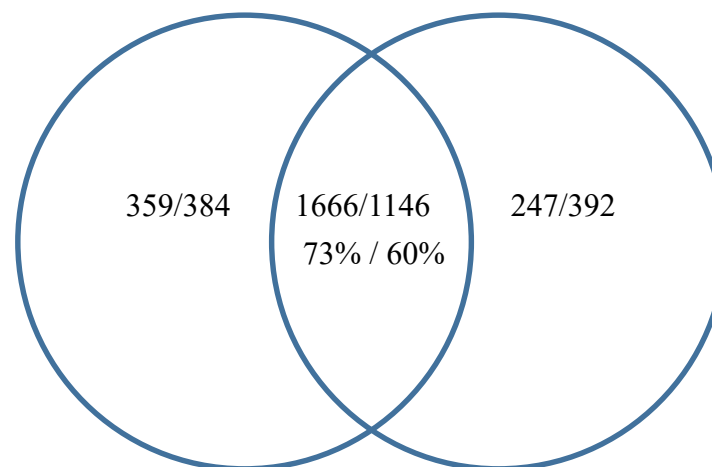

**C** Sorbitol + NaCl vs. Untreated (1029/882)  
*A. nidulans* THS30 (831/687) *A. nidulans*  $\Delta$ gfdB (650/638)

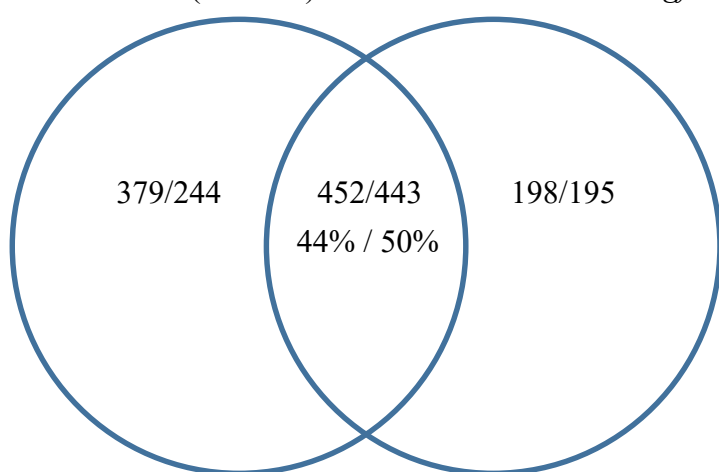

**Figure S2** Overlap between the stress responses of the *A. nidulans* THS30 and the  $\Delta$ gfdB strains. Venn-diagrams show the upregulated/downregulated genes observed under sorbitol (A), NaCl (B), and NaCl + sorbitol (C) treatments in the two strain. Percentages presented in the intersections show the number of genes upregulated/downregulated in both strains relative to the number of genes upregulated/downregulated in either of the two strains.

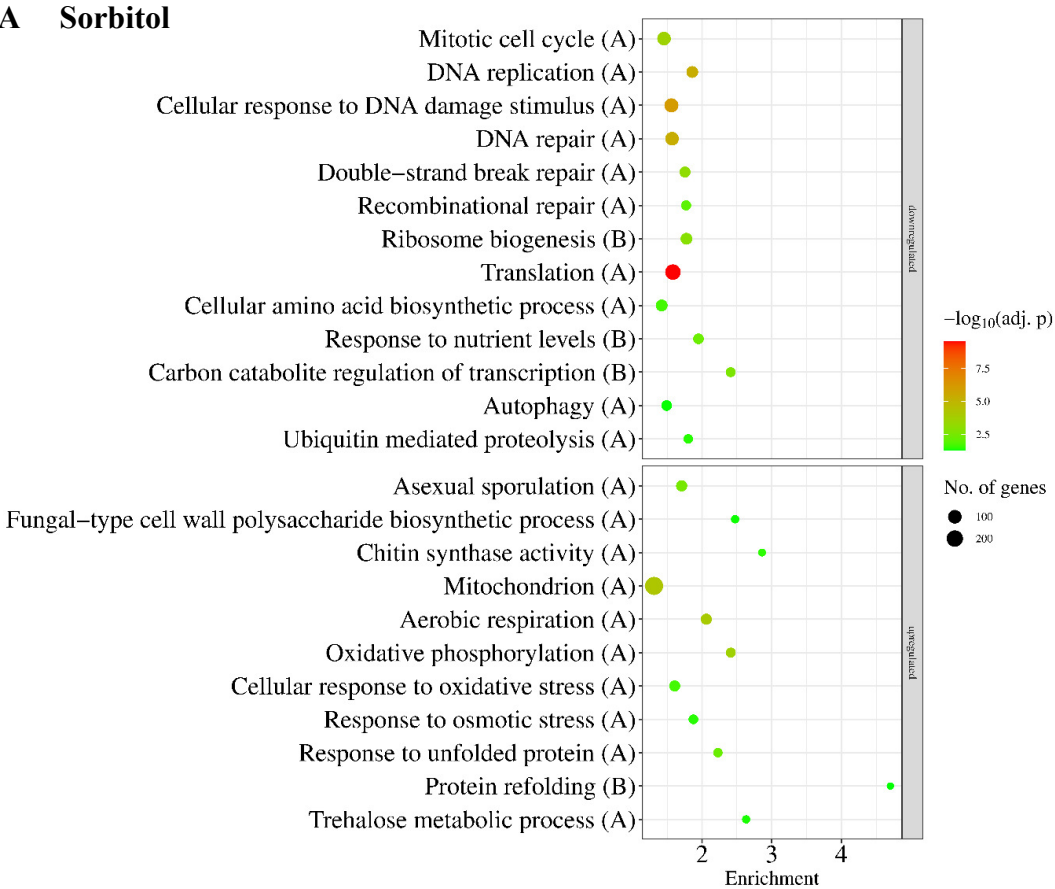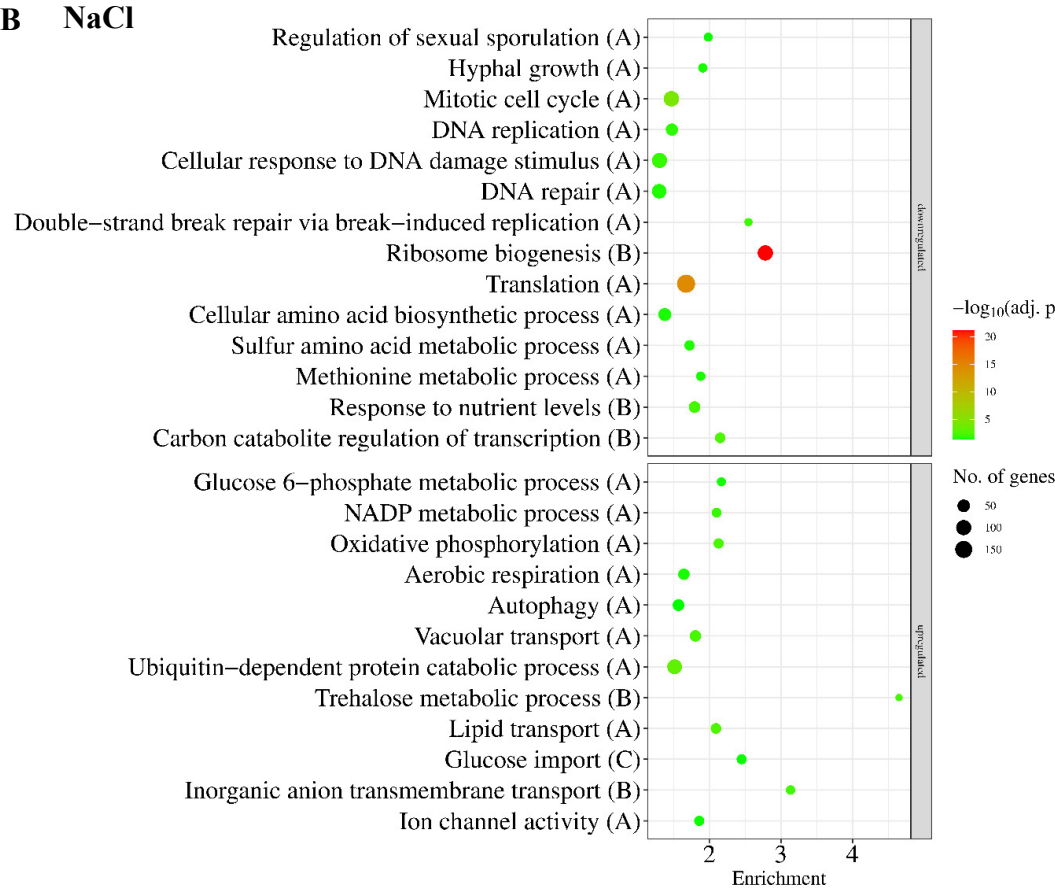

**Figures S3A and S3B** Gene set enrichment analyses of the effect of sorbitol (A) and NaCl (B) treatments on *A. nidulans*  $\Delta gfdB$ . Selected significantly enriched ( $p$  adjusted < 0.05) GO and KEGG pathway terms are presented. The full list of the enriched terms are available in Table S3. Letters in parentheses indicate the studied gene set: “A”— all DEGs, “B”— DEGs with  $|\log_2FC| > 1$ , “C”— DEGs with  $|\log_2FC| > 2$ . If a selected term was enriched in more than one gene set, only the set with the strongest criteria is presented.

C NaCl + sorbitol

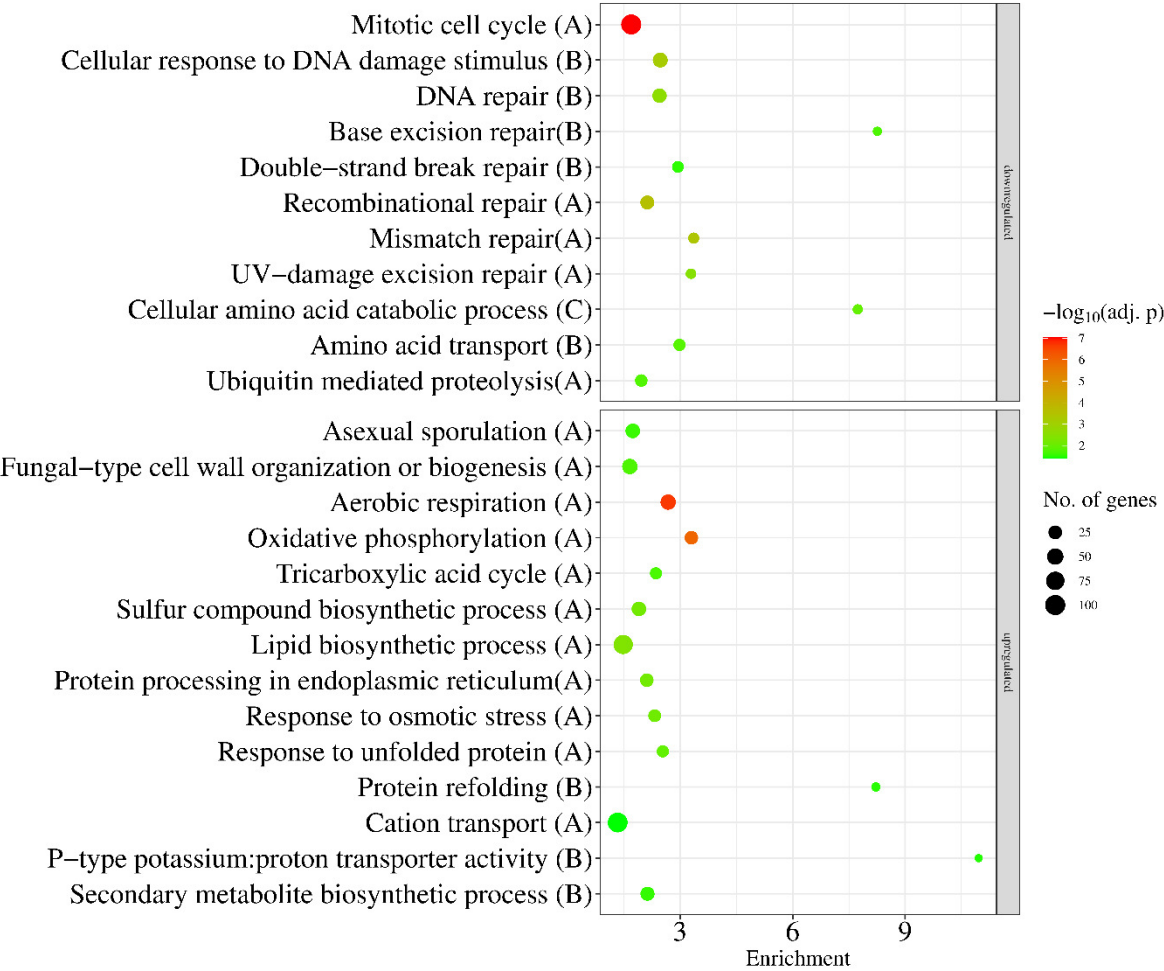

**Figure S3C** Gene set enrichment analyses of the effect of NaCl + sorbitol (C) treatment on *A. nidulans*  $\Delta gfdB$ . Selected significantly enriched ( $p$  adjusted  $< 0.05$ ) GO and KEGG pathway terms are presented. The full list of the enriched terms are available in Table S3. Letters in parentheses indicate the studied gene set: “A”— all DEGs, “B”— DEGs with  $|\log_2FC| > 1$ , “C”— DEGs with  $|\log_2FC| > 2$ . If a selected term was enriched in more than one gene set, only the set with the strongest criteria is presented.

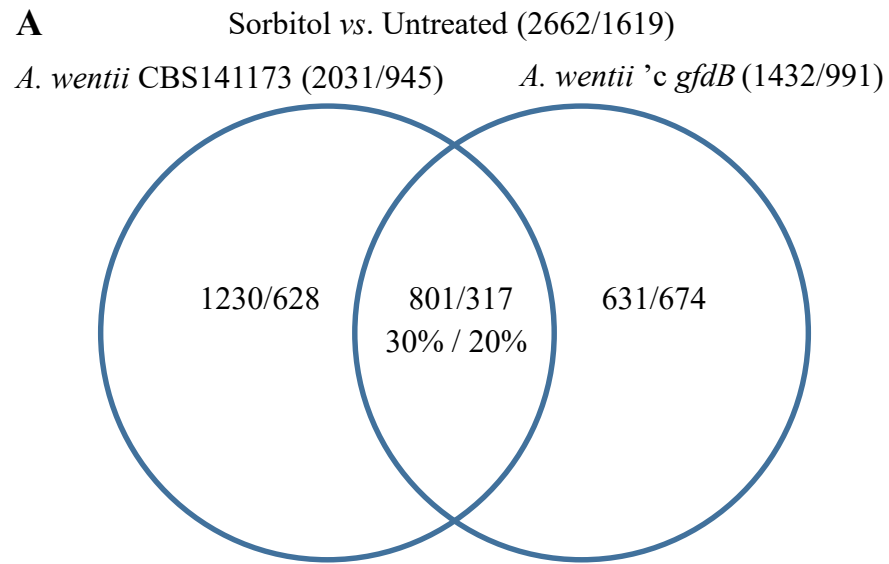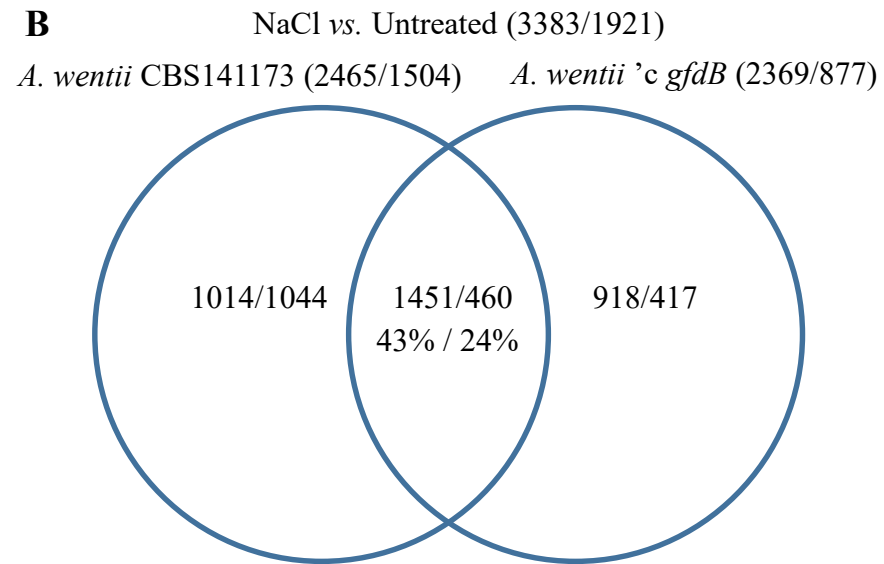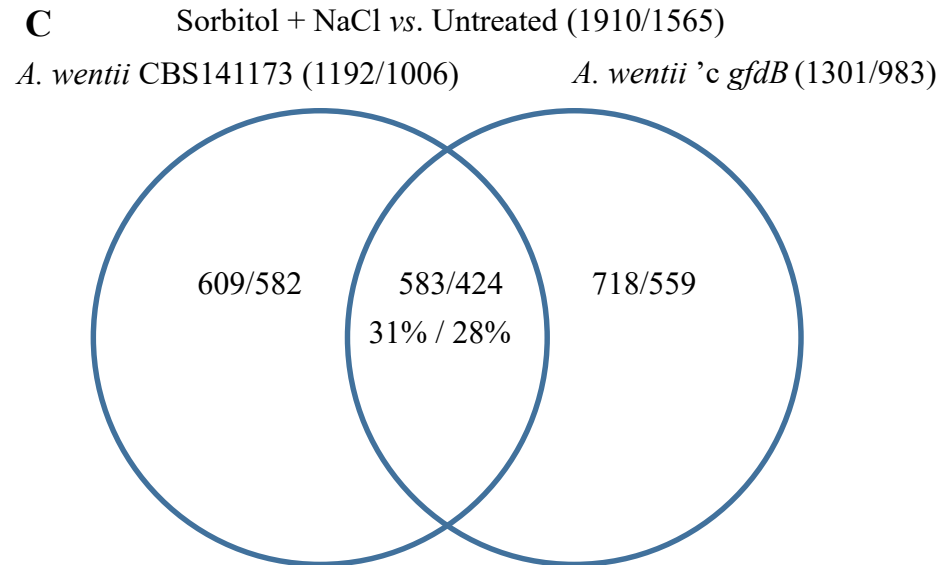

**Figure S4** Overlap between the stress responses of the *A. wentii* CBS141173 and the 'c *gfdB* strains. Venn-diagrams show the upregulated/downregulated genes observed under sorbitol (A), NaCl (B), and NaCl + sorbitol (C) treatments in the two strain. Percentages presented in the intersections show the number of genes upregulated/downregulated in both strains relative to the number of genes upregulated/downregulated in either of the two strains.

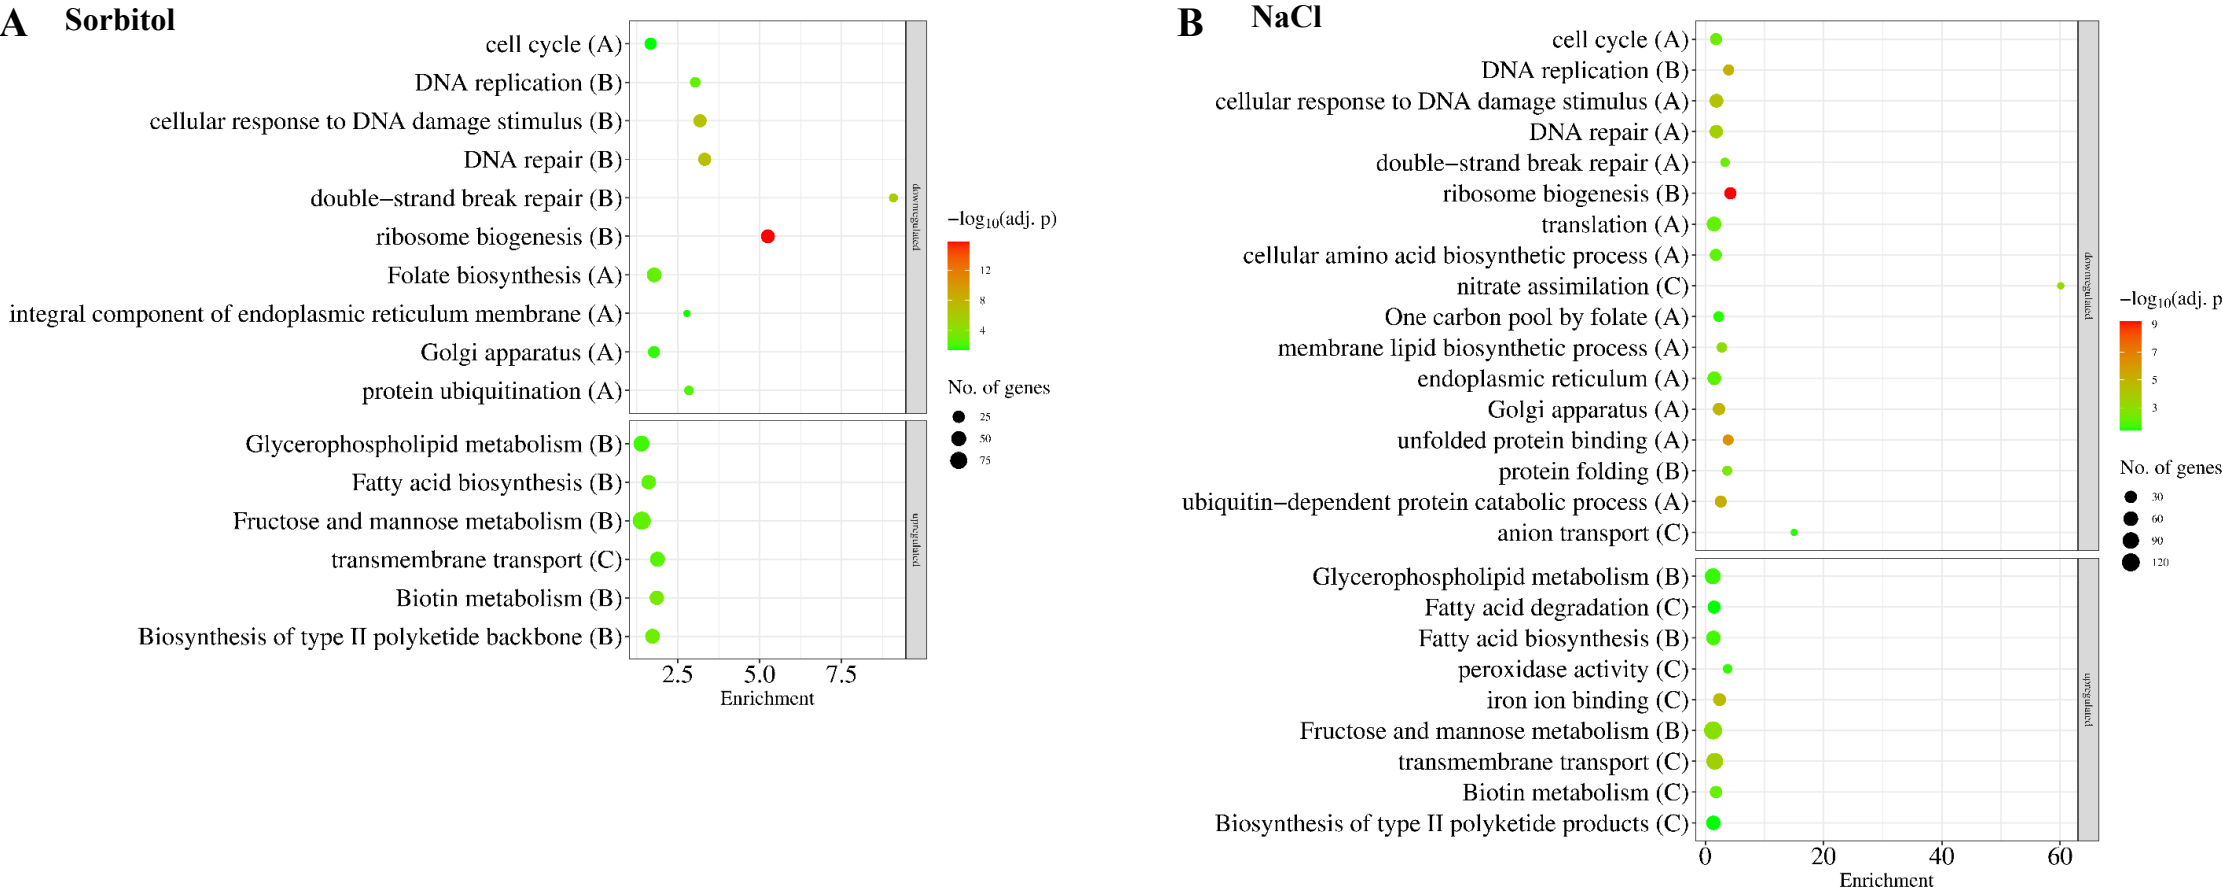

**Figures S5A and S5B** Gene set enrichment analyses of the effect of sorbitol (A) and NaCl (B) treatments on *A. wentii* 'c *gfdB*. Selected significantly enriched ( $p$  adjusted < 0.05) GO and KEGG pathway terms are presented. The full list of the enriched terms are available in Table S3. Letters in parentheses indicate the studied gene set: “A”— all DEGs, “B”— DEGs with  $|\log_2FC| > 1$ , “C”— DEGs with  $|\log_2FC| > 2$ . If a selected term was enriched in more than one gene set, only the set with the strongest criteria is presented.

C NaCl + sorbitol

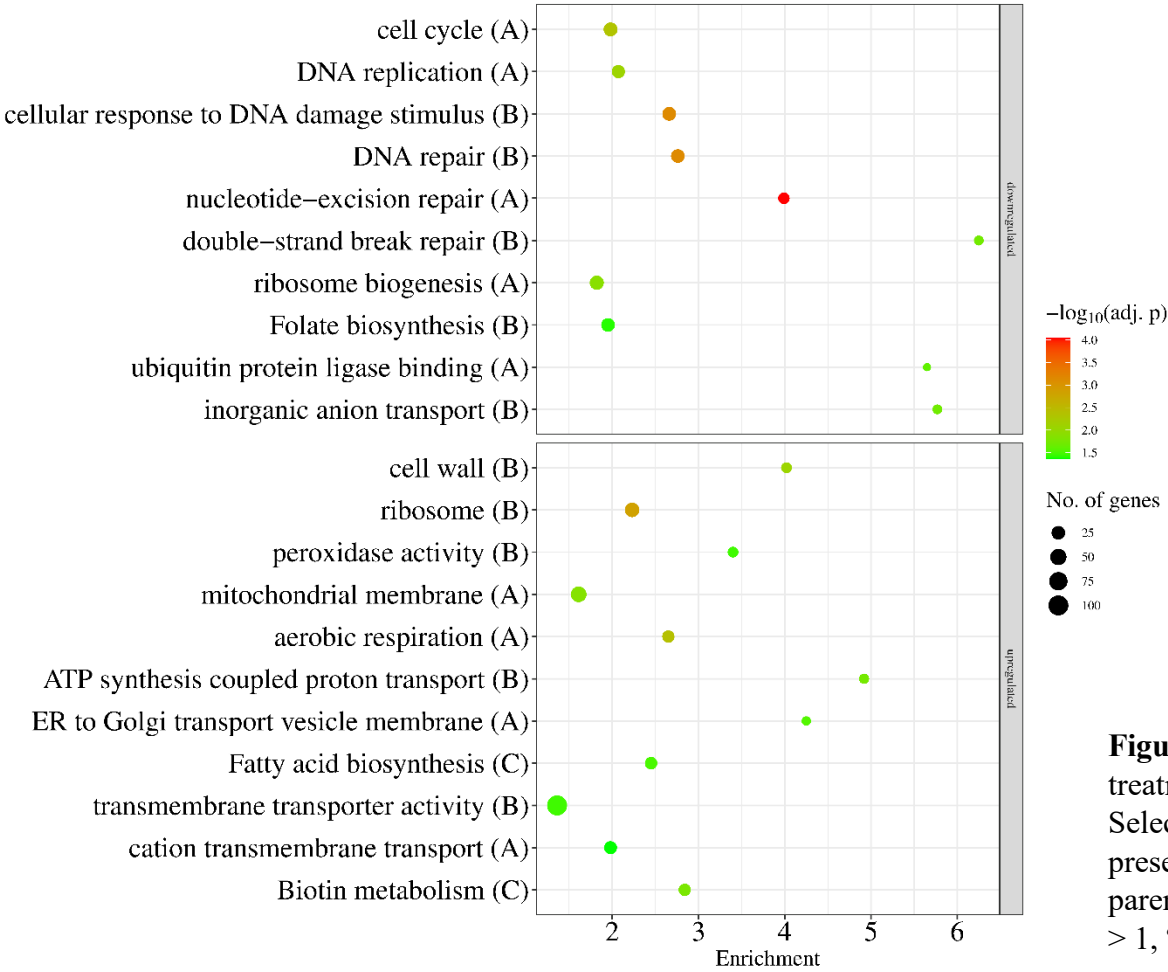

**Figure S5C** Gene set enrichment analyses of the effect of NaCl + sorbitol (C) treatment on *A. wentii* 'c *gfdB*.

Selected significantly enriched ( $p$  adjusted  $< 0.05$ ) GO and KEGG pathway terms are presented. The full list of the enriched terms are available in Table S3. Letters in parentheses indicate the studied gene set: “A”— all DEGs, “B”— DEGs with  $|\log_2\text{FC}| > 1$ , “C”— DEGs with  $|\log_2\text{FC}| > 2$ . If a selected term was enriched in more than one gene set, only the set with the strongest criteria is presented.
