# Supplementary material for: Aspergillus nidulans gfdB, Encoding the Hyperosmotic Stress Protein Glycerol-3-phosphate Dehydrogenase, Disrupts Osmoadaptation in Aspergillus wentii
Source: J Fungi (Basel). 2024 Apr 16;10(4):291. doi: 10.3390/jof10040291 (PMC11051529; doi:10.3390/jof10040291)
Supplement: Supplementary file 1 [file jof-10-00291-s001.zip]

Archive with 6 entries (6 files):
- Supplementary Figures.pdf
- Table S1.pdf
- Table S2.xlsx
- Table S3.xlsx
- Table S4.xlsx
- Table S5.xlsx
