# Supplementary material for: Aspergillus nidulans gfdB, Encoding the Hyperosmotic Stress Protein Glycerol-3-phosphate Dehydrogenase, Disrupts Osmoadaptation in Aspergillus wentii
Source: J Fungi (Basel). 2024 Apr 16;10(4):291. doi: 10.3390/jof10040291 (PMC11051529; doi:10.3390/jof10040291)
Supplement: Supplementary file 1 [file jof-10-00291-s001.zip › Table S2.xlsx]

## Sheet: A. nidulans
Table S2	RT-qPCR data of the A. nidulans cultures
	The transcription of the following A. nidulans genes was investigated by RT-qPCR:
	Gene ID	Gene name	Fungi Database description (https://fungidb.org/fungidb/app)
	AN0351	gfdA	Glycerol-3-phosphate dehydrogenase [NAD+]
	AN0443		Putative zinc containing alcohol dehydrogenase
	AN2815		Putative mannitol 2-dehydrogenase with a predicted role in mannose/mannitol, fructose, and sorbose/sorbitol metabolism
	AN4829		Putative reductase with a predicted role in carbohydrate metabolism
	AN5523	tpsA	Putative alpha,alpha-trehalose-phosphate synthase (UDP-forming) with a role in trehalose biosynthesis
	AN5634	acuD	isocitrate lyase, putative
	AN5885	agsA	Cell wall alpha-1,3-glucan synthase ags1, putative
	AN6700		Ortholog(s) have cytosol localization
	AN6792	gfdB	Glycerol-3-phosphate dehydrogenase [NAD+], putative
	AN8639		Putative alpha,alpha-trehalose-phosphate synthase (UDP-forming) with a predicted role in trehalose biosynthesis
	AN8803	rodA	Hydrophobin
	Culture	AN5634			AN5885			AN6700			AN0351			AN6792			AN8803			AN2815			AN5523			AN8639			AN0443			AN4829
		DCP	mean	SD	DCP	mean	SD	DCP	mean	SD	DCP	mean	SD	DCP	mean	SD	DCP	mean	SD	DCP	mean	SD	DCP	mean	SD	DCP	mean	SD	DCP	mean	SD	DCP	mean	SD
	A. nidulans WT_AMM	-8.51	-8.62333	0.6376	-11.42	-9.54667	2.02989	-2.94	-1.86	1.0022	-1.89	-2.08333	0.527289	-7.04	-7.76	0.725052	-11.01	-10.2967	1.87471	-11.68	-12.0333	0.360185	1.31	-0.466667	2.65606	-5.35	-6.08	1.48617	1.64	0.863333	1.13562	-6.23	-7.15667	0.846719
	A. nidulans WT_AMM	-9.31			-9.83			-1.68			-2.68			-8.49			-11.71			-12.4			-3.52			-7.79			-0.44			-7.35
	A. nidulans WT_AMM	-8.05			-7.39			-0.96			-1.68			-7.75			-8.17			-12.02			0.81			-5.1			1.39			-7.89
	A. nidulans WT_AMM_2M sorbitol	-3.28	-3.53333	0.363639	-9.83	-9.86333	1.0404	-0.95	-1.93	1.1732	-0.97	-1.63333	0.616955	-4.18	-4.46333	0.339755	-7.03	-9.1	2.22326	-6.34	-6.42667	0.16773	0.45	0.16	1.13318	-4.3	-3.77	0.667757	-0.77	-0.886667	0.106927	-10.37	-10.7467	0.915114
	A. nidulans WT_AMM_2M sorbitol	-3.37			-10.92			-1.61			-1.74			-4.37			-8.82			-6.62			1.12			-3.02			-0.98			-10.08
	A. nidulans WT_AMM_2M sorbitol	-3.95			-8.84			-3.23			-2.19			-4.84			-11.45			-6.32			-1.09			-3.99			-0.91			-11.79
	A. nidulans WT_AMM_1M NaCl	-4.89	-3.93333	1.14823	-10.95	-10.6467	0.300056	-4.87	-4.27667	0.555098	-1.58	-1.13333	0.41138	-4.11	-3.74667	0.319427	-13.36	-11.3133	1.80669	-7.57	-7.16333	1.62854	-0.13	-0.193333	0.309892	-3.88	-2.81667	0.950386	-2.48	-1.30333	1.02793	-10.95	-9.77	1.55345
	A. nidulans WT_AMM_1M NaCl	-4.25			-10.64			-4.19			-0.77			-3.62			-10.64			-8.55			-0.53			-2.05			-0.58			-8.01
	A. nidulans WT_AMM_1M NaCl	-2.66			-10.35			-3.77			-1.05			-3.51			-9.94			-5.37			0.08			-2.52			-0.85			-10.35
	A. nidulans WT_AMM_1M NaCl_2M sorbitol	-9.48	-7.02667	2.37887	-10.38	-8.91667	1.33986	-7.34	-3.2	3.79046	-5.85	-3.00333	2.47047	-8.84	-6.31	2.63015	-8.88	-8.35333	0.568888	-8.97	-8.19	0.675574	-0.13	-0.393333	0.260064	-4.41	-3.86333	0.929588	-0.18	1.28333	1.28072	-9.47	-7.67667	1.5531
	A. nidulans WT_AMM_1M NaCl_2M sorbitol	-4.73			-7.75			-2.36			-1.74			-6.5			-7.75			-7.79			-0.4			-4.39			2.2			-6.79
	A. nidulans WT_AMM_1M NaCl_2M sorbitol	-6.87			-8.62			0.1			-1.42			-3.59			-8.43			-7.81			-0.65			-2.79			1.83			-6.77
	A. nidulans Δ gfdB_AMM	-7.36	-7.55333	0.205994	-9.38	-9	0.846581	-1.21	-1.87	0.691954	-2.73	-3.1	0.500899	-10.89	-10.9333	0.149778	-8.81	-9.09333	0.339755	-12.23	-11.8033	0.590028	-1.71	-0.786667	0.810946	-5.36	-6.01333	0.567215	-0.15	0.36	0.98909	-8.13	-8.62667	0.800396
	A. nidulans Δ gfdB_AMM	-7.77			-9.59			-1.81			-2.9			-11.1			-9			-12.05			-0.46			-6.38			-0.27			-8.2
	A. nidulans Δ gfdB_AMM	-7.53			-8.03			-2.59			-3.67			-10.81			-9.47			-11.13			-0.19			-6.3			1.5			-9.55
	A. nidulans Δ gfdB_2M sorbitol	-6.27	-6.32	0.467012	-8.73	-8.32	0.468081	-3.86	-4.68667	1.11132	-4.29	-3.45333	1.18289	-10.6	-10.08	0.450444	-7.18	-7.18667	0.660025	-8.24	-9.21333	0.850078	0.22	-0.00666667	0.235443	-3.76	-3.99333	0.854244	-0.08	-0.06	0.94016	-11.4	-11.8667	0.773908
	A. nidulans Δ gfdB_2M sorbitol	-5.88			-8.42			-4.25			-3.97			-9.83			-7.85			-9.81			0.01			-3.28			-0.99			-12.76
	A. nidulans Δ gfdB_2M sorbitol	-6.81			-7.81			-5.95			-2.1			-9.81			-6.53			-9.59			-0.25			-4.94			0.89			-11.44
	A. nidulans Δ gfdB_1M NaCl	-4.25	-4.11333	0.793872	-10.08	-9.54667	0.561902	-4.18	-4.49667	0.522717	-1.94	-1.76	0.245764	-8.97	-9.89	1.27079	-8.41	-8.94667	0.85278	-9.83	-9.30667	1.25005	0.33	0.27	0.294618	-2.66	-2.97333	0.355715	-3.81	-1.99	1.69741	-11.87	-11.0367	1.78262
	A. nidulans Δ gfdB_1M NaCl	-4.83			-8.96			-5.1			-1.48			-9.36			-9.93			-10.21			0.53			-2.9			-0.45			-12.25
	A. nidulans Δ gfdB_1M NaCl	-3.26			-9.6			-4.21			-1.86			-11.34			-8.5			-7.88			-0.05			-3.36			-1.71			-8.99
	A. nidulans Δ gfdB_1M NaCl_2M sobitol	-8.54	-7.68	0.761774	-8.72	-7.94667	0.961579	-4.85	-4.7	0.167033	-4.95	-4.34667	0.525389	-10.38	-9.75333	1.01692	-7.5	-7.72	0.398497	-9.99	-10.66	1.20403	-0.05	-0.306667	0.418848	-5.22	-4.53667	0.591805	0.67	1.48667	0.75182	-7.94	-8.13667	0.920887
	A. nidulans Δ gfdB_1M NaCl_2M sobitol	-7.09			-6.87			-4.73			-3.99			-10.3			-8.18			-12.05			-0.79			-4.2			1.64			-9.14
	A. nidulans Δ gfdB_1M NaCl_2M sobitol	-7.41			-8.25			-4.52			-4.1			-8.58			-7.48			-9.94			-0.08			-4.19			2.15			-7.33
	Comparison	RNAseq data (Gene and log2FoldChange values)
		AN0351	AN0443	AN2815	AN4829	AN5523	AN5634	AN5885	AN6700	AN6792	AN8639	AN8803		Pearson's correlation coefficients between RNAseq and RT-qPCR (by treatments)
	mutant untreated vs wt untreated	0.00136033	-0.0928808	0.640147	0.15898	-0.00941272	1.37804	1.21368	0.0821494	-8.8858	0.76873	2.5852		0.878949	mutant untreated vs wt untreated
	mutant sorbitol vs wt sorbitol	-0.03084	0.683175	0.406852	-0.588193	0.155476	-0.0460374	3.13091	-0.45746	-11.4615	-0.0705425	3.93057		0.821846	mutant sorbitol vs wt sorbitol
	mutant NaCl vs wt NaCl	-0.00200143	0.229812	0.0332188	0.0356532	0.252882	-0.29477	2.63051	0.359126	-12.3002	-0.00382902	2.2943		0.91478	mutant NaCl vs wt NaCl
	mutant NaCl+sorbitol vs wt NaCl+sorbitol	-0.0933669	0.469082	0.254955	0.759123	0.390738	0.509609	1.91957	-0.394616	-7.85738	0.191453	2.05564		0.796988	mutant NaCl+sorbitol vs wt NaCl+sorbitol
	mutant sorbitol vs mutant untreated	0.15944	0.275358	2.71459	-2.65625	1.18833	2.35342	1.75767	-0.925854	1.47206	2.12974	2.16965		0.966022	mutant sorbitol vs mutant untreated
	mutant NaCl vs mutant untreated	0.850562	-0.722051	2.65328	-2.3117	1.4527	2.96124	-0.62506	-0.560065	2.45192	4.25946	-0.404251		0.904378	mutant NaCl vs mutant untreated
	mutant NaCl vs mutant sorbitol	0.691122	-0.997409	-0.0613037	0.344555	0.264372	0.60782	-2.38273	0.365788	0.979857	2.12972	-2.5739		0.784373	mutant NaCl vs mutant sorbitol
	mutant NaCl+sorbitol vs mutant untreated	-0.413643	0.760697	1.25142	-0.847469	0.427159	0.150836	1.54535	-0.589829	1.21398	0.962863	1.21473		0.747924	mutant NaCl+sorbitol vs mutant untreated
	mutant NaCl+sorbitol vs mutant sorbitol	-0.573083	0.485339	-1.46316	1.80878	-0.761174	-2.20259	-0.212318	0.336024	-0.258081	-1.16688	-0.954918		0.92142	mutant NaCl+sorbitol vs mutant sorbitol
	mutant NaCl+sorbitol vs mutant NaCl	-1.2642	1.48275	-1.40186	1.46423	-1.02555	-2.81041	2.17041	-0.0297641	-1.23794	-3.2966	1.61898		0.860363	mutant NaCl+sorbitol vs mutant NaCl
	wt sorbitol vs wt untreated	0.19164	-0.500698	2.94788	-1.90908	1.02344	3.7775	-0.159568	-0.386245	4.04775	2.96901	0.824274		0.923315	wt sorbitol vs wt untreated
	wt NaCl vs wt untreated	0.853923	-1.04474	3.26021	-2.18837	1.19041	4.63405	-2.0419	-0.837042	5.86629	5.03202	-0.113357		0.926996	wt NaCl vs wt untreated
	wt NaCl vs wt sorbitol	0.662283	-0.544046	0.312329	-0.279292	0.166965	0.856552	-1.88233	-0.450797	1.81855	2.06301	-0.937631		0.614413	wt NaCl vs wt sorbitol
	wt NaCl+sorbitol vs wt untreated	-0.318916	0.198734	1.63661	-1.44761	0.0270089	1.01926	0.839456	-0.113064	0.185557	1.54014	1.74429		0.817089	wt NaCl+sorbitol vs wt untreated
	wt NaCl+sorbitol vs wt sorbitol	-0.510556	0.699432	-1.31127	0.461466	-0.996436	-2.75823	0.999023	0.273181	-3.86219	-1.42887	0.920016		0.73329	wt NaCl+sorbitol vs wt sorbitol
	wt NaCl+sorbitol vs wt NaCl	-1.17284	1.24348	-1.6236	0.740758	-1.1634	-3.61478	2.88135	0.723978	-5.68074	-3.49188	1.85765		0.88828	wt NaCl+sorbitol vs wt NaCl
														0.797084	whole data set
	Comparison	RT-qPCR data (Gene and DDCP values)
		AN0351	AN0443	AN2815	AN4829	AN5523	AN5634	AN5885	AN6700	AN6792	AN8639	AN8803
	mutant untreated vs wt untreated	-1.01667	-0.503333	0.23	-1.47	-0.32	1.07	0.546667	-0.01	-3.17333	0.0666667	1.20333
	mutant sorbitol vs wt sorbitol	-1.82	0.826667	-2.78667	-1.12	-0.166667	-2.78667	1.54333	-2.75667	-5.61667	-0.223333	1.91333
	mutant NaCl vs wt NaCl	-0.626667	-0.686667	-2.14333	-1.26667	0.463333	-0.18	1.1	-0.22	-6.14333	-0.156667	2.36667
	mutant NaCl+sorbitol vs wt NaCl+sorbitol	-1.34333	0.203333	-2.47	-0.46	0.0866667	-0.653333	0.97	-1.5	-3.44333	-0.673333	0.633333
	mutant sorbitol vs mutant untreated	-0.353333	-0.42	2.59	-3.24	0.78	1.23333	0.68	-2.81667	0.853333	2.02	1.90667
	mutant NaCl vs mutant untreated	1.34	-2.35	2.49667	-2.41	1.05667	3.44	-0.546667	-2.62667	1.04333	3.04	0.146667
	mutant NaCl vs mutant sorbitol	1.69333	-1.93	-0.0933333	0.83	0.276667	2.20667	-1.22667	0.19	0.19	1.02	-1.76
	mutant NaCl+sorbitol vs mutant untreated	-1.24667	1.12667	1.14333	0.49	0.48	-0.126667	1.05333	-2.83	1.18	1.47667	1.37333
	mutant NaCl+sorbitol vs mutant sorbitol	-0.893333	1.54667	-1.44667	3.73	-0.3	-1.36	0.373333	-0.0133333	0.326667	-0.543333	-0.533333
	mutant NaCl+sorbitol vs mutant NaCl	-2.58667	3.47667	-1.35333	2.9	-0.576667	-3.56667	1.6	-0.203333	0.136667	-1.56333	1.22667
	wt sorbitol vs wt untreated	0.45	-1.75	5.60667	-3.59	0.626667	5.09	-0.316667	-0.07	3.29667	2.31	1.19667
	wt NaCl vs wt untreated	0.95	-2.16667	4.87	-2.61333	0.273333	4.69	-1.1	-2.41667	4.01333	3.26333	-1.01667
	wt NaCl vs wt sorbitol	0.5	-0.416667	-0.736667	0.976667	-0.353333	-0.4	-0.783333	-2.34667	0.716667	0.953333	-2.21333
	wt NaCl+sorbitol vs wt untreated	-0.92	0.42	3.84333	-0.52	0.0733333	1.59667	0.63	-1.34	1.45	2.21667	1.94333
	wt NaCl+sorbitol vs wt sorbitol	-1.37	2.17	-1.76333	3.07	-0.553333	-3.49333	0.946667	-1.27	-1.84667	-0.0933333	0.746667
	wt NaCl+sorbitol vs wt NaCl	-1.87	2.58667	-1.02667	2.09333	-0.2	-3.09333	1.73	1.07667	-2.56333	-1.04667	2.96
	Pearson's correlation coefficients between RNAseq and RT-qPCR (by genes)	0.890709	0.937455	0.835435	0.845271	0.851942	0.91742	0.963095	0.858289	0.982206	0.920449	0.838556

## Sheet: A. wentii
Table S2	RT-qPCR data of the A. wentii cultures
	The transcription of the following A. wentii genes was investigated by RT-qPCR:
	Gene ID	Gene name	Fungi Database description (https://fungidb.org/fungidb/app)
	ASPWEDRAFT_168397		Actin, gamma
	ASPWEDRAFT_189665		Chitin synthase (EC 2.4.1.16)
	ASPWEDRAFT_33357		Cytochrome P450
	ASPWEDRAFT_121910		Rhodanese domain-containing protein
	ASPWEDRAFT_165285		Glycoside hydrolase family 5 domain-containing protein
	ASPWEDRAFT_166217		Alkaline protease 1 (EC 3.4.21.63) (Aspergillopeptidase B) (Aspergillus proteinase B) (Elastase) (Elastinolytic serine proteinase) (Oryzin)
	ASPWEDRAFT_105168		Mannitol 2-dehydrogenase
	ASPWEDRAFT_117545		Mannitol-1-phosphate 5-dehydrogenase (EC 1.1.1.17)
	ASPWEDRAFT_184430		D-xylose reductase [NAD(P)H] (EC 1.1.1.307)
	ASPWEDRAFT_117870		Aldehyde dehydrogenase domain-containing protein
	ASPWEDRAFT_25409		Enoyl reductase (ER) domain-containing protein
	ASPWEDRAFT_35534		Aldehyde dehydrogenase domain-containing protein
	Culture	ASPWEDRAFT_168397			ASPWEDRAFT_189665			ASPWEDRAFT_33357			ASPWEDRAFT_121910			ASPWEDRAFT_165285			ASPWEDRAFT_166217			ASPWEDRAFT_105168			ASPWEDRAFT_117545			ASPWEDRAFT_184430			ASPWEDRAFT_117870			ASPWEDRAFT_25409			ASPWEDRAFT_35534
		DCP	DCP mean	DCP SD	DCP	DCP mean	DCP SD	DCP	DCP mean	DCP SD	DCP	DCP mean	DCP SD	DCP	DCP mean	DCP SD	DCP	DCP mean	DCP SD	DCP	DCP mean	DCP SD	DCP	DCP mean	DCP SD	DCP	DCP mean	DCP SD	DCP	DCP mean	DCP SD	DCP	DCP mean	DCP SD	DCP	DCP mean	DCP SD
	A. wentii WT_AMM	-0.96	-0.746667	0.208513	1.71	1.88333	0.534831	-1.6	-1.30333	0.440921	-11.2	-11.6167	0.599175	-12.25	-12.6267	1.15534	-4.37	-4.08667	0.434294	-3.15	-3.47333	0.470685	3.82	3.54	0.350682	-11.17	-9.73667	1.31587	-7.96	-7.23333	0.758449	4.8	3.69667	1.57205	-8.29	-8	0.884728
	A. wentii WT_AMM	-0.736667			2.48333			-0.796667			-11.3467			-11.7067			-3.58667			-3.25667			3.65333			-9.45667			-6.44667			4.39333			-7.00667
	A. wentii WT_AMM	-0.543333			1.45667			-1.51333			-12.3033			-13.9233			-4.30333			-4.01333			3.14667			-8.58333			-7.29333			1.89667			-8.70333
	A. wentii WT_2M sorbitol	-1.1	-1.08667	0.061101	1.17	1.27667	0.567568	-0.37	-0.823333	0.667633	-10.15	-10.7267	0.655769	-8.38	-9.27333	0.845064	-1.11	-1.84	1.96924	-2.49	-2.60667	0.722103	4.42	4.04	0.746458	-9.67	-8.21333	1.57621	-7.16	-6.32667	0.802081	4.03	3.45667	0.531633	-7.5	-7.44	0.052915
	A. wentii WT_2M sorbitol	-1.02			0.77			-1.59			-11.44			-10.06			-4.07			-3.38			3.18			-8.43			-6.26			2.98			-7.42
	A. wentii WT_2M sorbitol	-1.14			1.89			-0.51			-10.59			-9.38			-0.34			-1.95			4.52			-6.54			-5.56			3.36			-7.4
	A. wentii WT_1M NaCl	-1.44667	-1.60889	0.25266	0.343333	0.807778	0.44066	-1.22667	-0.998889	0.197325	-11.2767	-11.0956	0.810325	-10.5567	-9.95222	2.76991	-3.26667	-2.86222	0.764906	-3.50667	-3.05556	0.438892	2.82333	3.37444	0.510091	-7.08667	-7.55222	0.517862	-5.70667	-5.26889	0.921595	4.56333	4.06111	0.517272	-6.87667	-6.07556	0.732502
	A. wentii WT_1M NaCl	-1.48			1.22			-0.89			-10.21			-6.93			-1.98			-3.03			3.47			-8.11			-5.89			4.09			-5.44
	A. wentii WT_1M NaCl	-1.9			0.86			-0.88			-11.8			-12.37			-3.34			-2.63			3.83			-7.46			-4.21			3.53			-5.91
	A. wentii WT_2M sorbitol_1M NaCl	-0.906667	-0.413333	0.622932	0.733333	0.673333	0.0520683	-0.896667	-0.756667	0.335973	-8.76667	-9.39333	0.544437	-8.81667	-9.64667	0.821793	-2.62667	-2.40667	0.588369	-4.73667	-4.70333	0.803852	3.16333	2.77	0.522855	-9.36667	-10.04	0.652746	-12.3567	-10.1733	2.43756	5.90333	5.32667	0.502803	-8.77667	-8.72667	1.00926
	A. wentii WT_2M sorbitol_1M NaCl	-0.62			0.64			-1			-9.75			-10.46			-1.74			-5.49			2.97			-10.67			-10.62			4.98			-9.71
	A. wentii WT_2M sorbitol_1M NaCl	0.286667			0.646667			-0.373333			-9.66333			-9.66333			-2.85333			-3.88333			2.17667			-10.0833			-7.54333			5.09667			-7.69333
	A, wentii c'gfdB_AMM	-0.453333	-0.527778	0.0670268	0.706667	0.612222	0.348079	-3.25333	-3.61444	0.740903	-9.97333	-10.3411	0.878131	-10.8033	-10.7078	0.781063	-7.27333	-7.09778	0.264687	-4.96333	-4.34111	0.543827	3.42667	3.54222	0.185901	-11.0133	-9.74778	1.8564	-9.12333	-7.27111	1.64006	4.39667	4.35556	0.469685	-9.30333	-9.41444	0.1295
	A, wentii c'gfdB_AMM	-0.583333			0.226667			-3.12333			-11.3433			-9.88333			-6.79333			-4.10333			3.75667			-10.6133			-6.00333			3.86667			-9.38333
	A, wentii c'gfdB_AMM	-0.546667			0.903333			-4.46667			-9.70667			-11.4367			-7.22667			-3.95667			3.44333			-7.61667			-6.68667			4.80333			-9.55667
	A, wentii c'gfdB_2M sorbitol	-0.736667	-0.573333	0.214813	-0.0866667	0.146667	0.216128	-3.41667	-3.40333	0.596778	-7.76667	-7.85333	0.916412	-8.76667	-7.39667	2.09638	-4.94667	-5.07667	0.272662	-4.30667	-3.93	1.2838	3.17333	2.97	0.560069	-7.29667	-8.19667	1.84898	-4.91667	-5.75333	0.760709	3.38333	3.19333	0.204641	-7.11667	-7.84333	0.661345
	A, wentii c'gfdB_2M sorbitol	-0.33			0.34			-2.8			-8.81			-8.44			-5.39			-2.5			3.4			-6.97			-5.94			3.22			-8.41
	A, wentii c'gfdB_2M sorbitol	-0.653333			0.186667			-3.99333			-6.98333			-4.98333			-4.89333			-4.98333			2.33667			-10.3233			-6.40333			2.97667			-8.00333
	A, wentii c'gfdB_1M NaCl	-1.57333	-1.31778	0.221343	1.04667	1.22556	0.236228	-3.61333	-3.75778	0.747212	-10.1733	-10.3078	1.90523	-10.5633	-8.52444	1.76847	-5.70333	-5.39444	0.635692	-1.39333	-1.48444	0.890171	3.23667	3.06222	0.391951	-6.99333	-6.91444	0.0920346	-4.02333	-3.85444	0.253187	1.19667	2.14889	1.57484	-4.45333	-3.40444	1.81096
	A, wentii c'gfdB_1M NaCl	-1.19333			1.13667			-3.09333			-8.47333			-7.60333			-4.66333			-0.643333			3.33667			-6.81333			-3.56333			3.96667			-1.31333
	A, wentii c'gfdB_1M NaCl	-1.18667			1.49333			-4.56667			-12.2767			-7.40667			-5.81667			-2.41667			2.61333			-6.93667			-3.97667			1.28333			-4.44667
	A, wentii c'gfdB_2M sorbitol_1M NaCl	0.473333	0.23	0.236948	0.0433333	0.56	0.449382	-4.33667	-4.54333	0.294071	-8.75667	-8.32	1.623	-7.86667	-7.46667	0.802004	-5.18667	-5.20333	0.371947	-5.58667	-5.68	0.221911	2.39333	2.45333	0.106823	-10.4267	-10.1133	0.290364	-12.4967	-10.4767	2.51482	4.76333	4.35	0.372574	-8.39667	-7.71333	0.641777
	A, wentii c'gfdB_2M sorbitol_1M NaCl	0			0.86			-4.88			-9.68			-7.99			-4.84			-5.52			2.39			-10.06			-7.66			4.04			-7.62
	A, wentii c'gfdB_2M sorbitol_1M NaCl	0.216667			0.776667			-4.41333			-6.52333			-6.54333			-5.58333			-5.93333			2.57667			-9.85333			-11.2733			4.24667			-7.12333
	Comparison	RNAseq data (Gene and log2FoldChange values)
		ASPWEDRAFT_168397	ASPWEDRAFT_189665	ASPWEDRAFT_33357	ASPWEDRAFT_121910	ASPWEDRAFT_165285	ASPWEDRAFT_166217	ASPWEDRAFT_105168	ASPWEDRAFT_117545	ASPWEDRAFT_184430	ASPWEDRAFT_117870	ASPWEDRAFT_25409	ASPWEDRAFT_35534		Pearson's correlation coefficients between RNAseq and RT-qPCR
	mutant untreated vs wt untreated	-0.0899488	-1.21108	-2.2733	1.37126	3.17216	-2.31838	-0.39196	0.171276	-0.442655	-0.0935175	0.914597	-0.957703		0.961687	mutant untreated vs wt untreated
	mutant sorbitol vs wt sorbitol	0.553274	-0.273438	-2.61837	2.45259	3.71466	-1.84272	-0.214413	-0.866277	-0.435194	0.0330092	-0.101442	-0.738071		0.891865	mutant sorbitol vs wt sorbitol
	mutant NaCl vs wt NaCl	0.0997972	1.09307	-2.23841	1.36868	2.00912	-2.02753	0.384992	0.324614	-0.0183273	0.453289	-0.690105	1.61181		0.886611	mutant NaCl vs wt NaCl
	mutant NaCl+sorbitol vs wt NaCl+sorbitol	0.273972	-0.325259	-2.94692	1.57079	3.48338	-1.35557	0.0184465	0.195435	-0.933692	0.264095	-0.535342	3.22409		0.90247	mutant NaCl+sorbitol vs wt NaCl+sorbitol
	mutant sorbitol vs mutant untreated	0.165938	-0.105004	-0.437737	1.26985	3.59483	1.94577	0.621686	-0.617953	0.329949	1.07735	-1.01476	2.44146		0.890789	mutant sorbitol vs mutant untreated
	mutant NaCl vs mutant untreated	-0.381044	0.618783	-0.416324	-0.049437	2.36305	1.26807	1.58975	-0.0118949	1.22831	2.5148	-1.78257	5.09303		0.966236	mutant NaCl vs mutant untreated
	mutant NaCl vs mutant sorbitol	-0.546982	0.723787	0.0214128	-1.31929	-1.23178	-0.677696	0.968068	0.606058	0.898363	1.43745	-0.767808	2.65157		0.955787	mutant NaCl vs mutant sorbitol
	mutant NaCl+sorbitol vs mutant untreated	0.336741	-0.351205	-0.610218	1.46302	3.74625	2.12082	-0.955204	-0.377887	-1.55613	-0.471907	-0.924814	2.77655		0.827192	mutant NaCl+sorbitol vs mutant untreated
	mutant NaCl+sorbitol vs mutant sorbitol	0.170803	-0.2462	-0.172481	0.193169	0.151412	0.175052	-1.57689	0.240066	-1.88608	-1.54926	0.0899443	0.335082		0.762932	mutant NaCl+sorbitol vs mutant sorbitol
	mutant NaCl+sorbitol vs mutant NaCl	0.717785	-0.969987	-0.193894	1.51245	1.38319	0.852749	-2.54496	-0.365992	-2.78445	-2.98671	0.857752	-2.31649		0.942195	mutant NaCl+sorbitol vs mutant NaCl
	wt sorbitol vs wt untreated	-0.477285	-1.04265	-0.092659	0.188518	3.05234	1.47011	0.444139	0.4196	0.322488	0.950828	0.00128048	2.22183		0.781661	wt sorbitol vs wt untreated
	wt NaCl vs wt untreated	-0.57079	-1.68536	-0.451205	-0.0468525	3.52609	0.977225	0.812801	-0.165233	0.803983	1.96799	-0.177865	2.52352		0.907744	wt NaCl vs wt untreated
	wt NaCl vs wt sorbitol	-0.0935048	-0.642717	-0.358546	-0.235371	0.473751	-0.492885	0.368662	-0.584833	0.481496	1.01717	-0.179145	0.301691		0.594213	wt NaCl vs wt sorbitol
	wt NaCl+sorbitol vs wt untreated	-0.0271799	-1.23703	0.0634026	1.26349	3.43503	1.15802	-1.36561	-0.402047	-1.0651	-0.829519	0.525124	-1.40524		0.862869	wt NaCl+sorbitol vs wt untreated
	wt NaCl+sorbitol vs wt sorbitol	0.450105	-0.194379	0.156062	1.07497	0.382687	-0.312093	-1.80975	-0.821646	-1.38759	-1.78035	0.523844	-3.62707		0.713747	wt NaCl+sorbitol vs wt sorbitol
	wt NaCl+sorbitol vs wt NaCl	0.54361	0.448338	0.514607	1.31034	-0.0910638	0.180792	-2.17841	-0.236814	-1.86908	-2.79751	0.702989	-3.92877		0.891887	wt NaCl+sorbitol vs wt NaCl
															0.875482	whole data set
	Comparison	RT-qPCR data (Gene and DDCP values)
		ASPWEDRAFT_168397	ASPWEDRAFT_189665	ASPWEDRAFT_33357	ASPWEDRAFT_121910	ASPWEDRAFT_165285	ASPWEDRAFT_166217	ASPWEDRAFT_105168	ASPWEDRAFT_117545	ASPWEDRAFT_184430	ASPWEDRAFT_117870	ASPWEDRAFT_25409	ASPWEDRAFT_35534
	mutant untreated vs wt untreated	0.218889	-1.27111	-2.31111	1.27556	1.91889	-3.01111	-0.867778	0.00222222	-0.0111111	-0.0377778	0.658889	-1.41444
	mutant sorbitol vs wt sorbitol	0.513333	-1.13	-2.58	2.87333	1.87667	-3.23667	-1.32333	-1.07	0.0166667	0.573333	-0.263333	-0.403333
	mutant NaCl vs wt NaCl	0.291111	0.417778	-2.75889	0.787778	1.42778	-2.53222	1.57111	-0.312222	0.637778	1.41444	-1.91222	2.67111
	mutant NaCl+sorbitol vs wt NaCl+sorbitol	0.643333	-0.113333	-3.78667	1.07333	2.18	-2.79667	-0.976667	-0.316667	-0.0733333	-0.303333	-0.976667	1.01333
	mutant sorbitol vs mutant untreated	-0.0455556	-0.465556	0.211111	2.48778	3.31111	2.02111	0.411111	-0.572222	1.55111	1.51778	-1.16222	1.57111
	mutant NaCl vs mutant untreated	-0.79	0.613333	-0.143333	0.0333333	2.18333	1.70333	2.85667	-0.48	2.83333	3.41667	-2.20667	6.01
	mutant NaCl vs mutant sorbitol	-0.744444	1.07889	-0.354444	-2.45444	-1.12778	-0.317778	2.44556	0.0922222	1.28222	1.89889	-1.04444	4.43889
	mutant NaCl+sorbitol vs mutant untreated	0.757778	-0.0522222	-0.928889	2.02111	3.24111	1.89444	-1.33889	-1.08889	-0.365556	-3.20556	-0.00555556	1.70111
	mutant NaCl+sorbitol vs mutant sorbitol	0.803333	0.413333	-1.14	-0.466667	-0.07	-0.126667	-1.75	-0.516667	-1.91667	-4.72333	1.15667	0.13
	mutant NaCl+sorbitol vs mutant NaCl	1.54778	-0.665556	-0.785556	1.98778	1.05778	0.191111	-4.19556	-0.608889	-3.19889	-6.62222	2.20111	-4.30889
	wt sorbitol vs wt untreated	-0.34	-0.606667	0.48	0.89	3.35333	2.24667	0.866667	0.5	1.52333	0.906667	-0.24	0.56
	wt NaCl vs wt untreated	-0.862222	-1.07556	0.304444	0.521111	2.67444	1.22444	0.417778	-0.165556	2.18444	1.96444	0.364444	1.92444
	wt NaCl vs wt sorbitol	-0.522222	-0.468889	-0.175556	-0.368889	-0.678889	-1.02222	-0.448889	-0.665556	0.661111	1.05778	0.604444	1.36444
	wt NaCl+sorbitol vs wt untreated	0.333333	-1.21	0.546667	2.22333	2.98	1.68	-1.23	-0.77	-0.303333	-2.94	1.63	-0.726667
	wt NaCl+sorbitol vs wt sorbitol	0.673333	-0.603333	0.0666667	1.33333	-0.373333	-0.566667	-2.09667	-1.27	-1.82667	-3.84667	1.87	-1.28667
	wt NaCl+sorbitol vs wt NaCl	1.19556	-0.134444	0.242222	1.70222	0.305556	0.455556	-1.64778	-0.604444	-2.48778	-4.90444	1.26556	-2.65111
	Pearson's correlation coefficients between RNAseq and RT-qPCR (by genes)	0.912833	0.810393	0.924932	0.902591	0.929305	0.966715	0.897493	0.831062	0.953814	0.96072	0.869125	0.859783
