# Supplementary material for: Aspergillus nidulans gfdB, Encoding the Hyperosmotic Stress Protein Glycerol-3-phosphate Dehydrogenase, Disrupts Osmoadaptation in Aspergillus wentii
Source: J Fungi (Basel). 2024 Apr 16;10(4):291. doi: 10.3390/jof10040291 (PMC11051529; doi:10.3390/jof10040291)
Supplement: Supplementary file 1 [file jof-10-00291-s001.zip › Table S3.xlsx]

## Sheet: Overview
	Table S3	Results of the gene set enrichment analyses
	Sheet 1	A. nidulans	THS30	cultures	Sorbitol	vs.	untreated
	Sheet 2	A. nidulans	THS30	cultures	NaCl	vs.	untreated
	Sheet 3	A. nidulans	THS30	cultures	NaCl + sorbitol	vs.	untreated
	Sheet 4	A. nidulans	untreated	cultures	DgfdB	vs.	THS30
	Sheet 5	A. nidulans	DgfdB	cultures	Sorbitol	vs.	untreated
	Sheet 6	A. nidulans	DgfdB	cultures	NaCl	vs.	untreated
	Sheet 7	A. nidulans	DgfdB	cultures	NaCl + sorbitol	vs.	untreated
	Sheet 8	A. wentii	CBS141173	cultures	Sorbitol	vs.	untreated
	Sheet 9	A. wentii	CBS141173	cultures	NaCl	vs.	untreated
	Sheet 10	A. wentii	CBS141173	cultures	NaCl + sorbitol	vs.	untreated
	Sheet 11	A. wentii	untreated	cultures	'c gdfB	vs.	CBS141173
	Sheet 12	A. wentii	'c gdfB	cultures	Sorbitol	vs.	untreated
	Sheet 13	A. wentii	'c gdfB	cultures	NaCl	vs.	untreated
	Sheet 14	A. wentii	'c gdfB	cultures	NaCl + sorbitol	vs.	untreated

## Sheet: Anid wt Sorbitol
Sorbitol vs. Untreated	A. nidulans	THS30	downregulated genes	DEG; log2FC<-2
Enrichment FDR	nGenes	Pathway Genes	Fold Enrichment	Pathway	URL	Genes
6.33676e-05	20	352	3.6368	Host cellular component	http://amigo.geneontology.org/amigo/term/GO:0018995	ANIA_00197 ANIA_00902 ANIA_03290 ANIA_04123 ANIA_04626 ANIA_05274 ANIA_05775 ANIA_06747 ANIA_06846 ANIA_07896 ANIA_08079 ANIA_08103 ANIA_08164 ANIA_08355 ANIA_08426 ANIA_08655 ANIA_09458 ANIA_10600 ANIA_10961 ANIA_11818
6.33676e-05	20	352	3.6368	Host cell part	http://amigo.geneontology.org/amigo/term/GO:0033643	ANIA_00197 ANIA_00902 ANIA_03290 ANIA_04123 ANIA_04626 ANIA_05274 ANIA_05775 ANIA_06747 ANIA_06846 ANIA_07896 ANIA_08079 ANIA_08103 ANIA_08164 ANIA_08355 ANIA_08426 ANIA_08655 ANIA_09458 ANIA_10600 ANIA_10961 ANIA_11818
6.33676e-05	20	352	3.6368	Host intracellular part	http://amigo.geneontology.org/amigo/term/GO:0033646	ANIA_00197 ANIA_00902 ANIA_03290 ANIA_04123 ANIA_04626 ANIA_05274 ANIA_05775 ANIA_06747 ANIA_06846 ANIA_07896 ANIA_08079 ANIA_08103 ANIA_08164 ANIA_08355 ANIA_08426 ANIA_08655 ANIA_09458 ANIA_10600 ANIA_10961 ANIA_11818
6.33676e-05	20	351	3.64728	Host intracellular organelle	http://amigo.geneontology.org/amigo/term/GO:0033647	ANIA_00197 ANIA_00902 ANIA_03290 ANIA_04123 ANIA_04626 ANIA_05274 ANIA_05775 ANIA_06747 ANIA_06846 ANIA_07896 ANIA_08079 ANIA_08103 ANIA_08164 ANIA_08355 ANIA_08426 ANIA_08655 ANIA_09458 ANIA_10600 ANIA_10961 ANIA_11818
6.33676e-05	20	351	3.64728	Host intracellular membrane-bounded organelle	http://amigo.geneontology.org/amigo/term/GO:0033648	ANIA_00197 ANIA_00902 ANIA_03290 ANIA_04123 ANIA_04626 ANIA_05274 ANIA_05775 ANIA_06747 ANIA_06846 ANIA_07896 ANIA_08079 ANIA_08103 ANIA_08164 ANIA_08355 ANIA_08426 ANIA_08655 ANIA_09458 ANIA_10600 ANIA_10961 ANIA_11818
6.33676e-05	20	351	3.64728	Host cell nucleus	http://amigo.geneontology.org/amigo/term/GO:0042025	ANIA_00197 ANIA_00902 ANIA_03290 ANIA_04123 ANIA_04626 ANIA_05274 ANIA_05775 ANIA_06747 ANIA_06846 ANIA_07896 ANIA_08079 ANIA_08103 ANIA_08164 ANIA_08355 ANIA_08426 ANIA_08655 ANIA_09458 ANIA_10600 ANIA_10961 ANIA_11818
6.33676e-05	20	352	3.6368	Host intracellular region	http://amigo.geneontology.org/amigo/term/GO:0043656	ANIA_00197 ANIA_00902 ANIA_03290 ANIA_04123 ANIA_04626 ANIA_05274 ANIA_05775 ANIA_06747 ANIA_06846 ANIA_07896 ANIA_08079 ANIA_08103 ANIA_08164 ANIA_08355 ANIA_08426 ANIA_08655 ANIA_09458 ANIA_10600 ANIA_10961 ANIA_11818
6.33676e-05	20	352	3.6368	Host cell	http://amigo.geneontology.org/amigo/term/GO:0043657	ANIA_00197 ANIA_00902 ANIA_03290 ANIA_04123 ANIA_04626 ANIA_05274 ANIA_05775 ANIA_06747 ANIA_06846 ANIA_07896 ANIA_08079 ANIA_08103 ANIA_08164 ANIA_08355 ANIA_08426 ANIA_08655 ANIA_09458 ANIA_10600 ANIA_10961 ANIA_11818
0.000173173	21	415	3.25707	DNA-binding transcription factor activity, RNA polymerase II-specific	http://amigo.geneontology.org/amigo/term/GO:0000981	ANIA_00197 ANIA_00902 ANIA_03290 ANIA_04123 ANIA_04626 ANIA_05274 ANIA_05775 ANIA_06747 ANIA_06846 ANIA_07896 ANIA_08079 ANIA_08103 ANIA_08164 ANIA_08355 ANIA_08426 ANIA_08655 ANIA_09458 ANIA_10600 ANIA_10961 ANIA_11197 ANIA_11818
0.000217476	22	461	3.08001	DNA-binding transcription factor activity	http://amigo.geneontology.org/amigo/term/GO:0003700	ANIA_00197 ANIA_00902 ANIA_03290 ANIA_04123 ANIA_04626 ANIA_05274 ANIA_05775 ANIA_06747 ANIA_06846 ANIA_07896 ANIA_08079 ANIA_08103 ANIA_08164 ANIA_08355 ANIA_08426 ANIA_08655 ANIA_09458 ANIA_10600 ANIA_10623 ANIA_10961 ANIA_11197 ANIA_11818
0.000454683	23	523	2.83713	Zinc ion binding	http://amigo.geneontology.org/amigo/term/GO:0008270	ANIA_00197 ANIA_00902 ANIA_03290 ANIA_04123 ANIA_04626 ANIA_05274 ANIA_05775 ANIA_06747 ANIA_06846 ANIA_07896 ANIA_08079 ANIA_08103 ANIA_08164 ANIA_08355 ANIA_08426 ANIA_08655 ANIA_08979 ANIA_09458 ANIA_10600 ANIA_10623 ANIA_10961 ANIA_11197 ANIA_11818
0.000503896	25	604	2.65437	Regulation of transcription by RNA polymerase II	http://amigo.geneontology.org/amigo/term/GO:0006357	ANIA_00197 ANIA_00902 ANIA_01867 ANIA_03290 ANIA_04123 ANIA_04626 ANIA_05274 ANIA_05775 ANIA_06569 ANIA_06747 ANIA_06846 ANIA_07896 ANIA_08079 ANIA_08103 ANIA_08164 ANIA_08355 ANIA_08426 ANIA_08655 ANIA_09458 ANIA_10391 ANIA_10600 ANIA_10623 ANIA_10961 ANIA_11197 ANIA_11818
0.00108761	25	634	2.52717	Transcription by RNA polymerase II	http://amigo.geneontology.org/amigo/term/GO:0006366	ANIA_00197 ANIA_00902 ANIA_01867 ANIA_03290 ANIA_04123 ANIA_04626 ANIA_05274 ANIA_05775 ANIA_06569 ANIA_06747 ANIA_06846 ANIA_07896 ANIA_08079 ANIA_08103 ANIA_08164 ANIA_08355 ANIA_08426 ANIA_08655 ANIA_09458 ANIA_10391 ANIA_10600 ANIA_10623 ANIA_10961 ANIA_11197 ANIA_11818
0.0012491	22	524	2.70323	Transcription regulator activity	http://amigo.geneontology.org/amigo/term/GO:0140110	ANIA_00197 ANIA_00902 ANIA_03290 ANIA_04123 ANIA_04626 ANIA_05274 ANIA_05775 ANIA_06747 ANIA_06846 ANIA_07896 ANIA_08079 ANIA_08103 ANIA_08164 ANIA_08355 ANIA_08426 ANIA_08655 ANIA_09458 ANIA_10600 ANIA_10623 ANIA_10961 ANIA_11197 ANIA_11818
0.00411082	26	743	2.24766	Regulation of nucleic acid-templated transcription	http://amigo.geneontology.org/amigo/term/GO:1903506	ANIA_00197 ANIA_00902 ANIA_01867 ANIA_03290 ANIA_04123 ANIA_04626 ANIA_05274 ANIA_05775 ANIA_06569 ANIA_06747 ANIA_06846 ANIA_07896 ANIA_08079 ANIA_08092 ANIA_08103 ANIA_08164 ANIA_08355 ANIA_08426 ANIA_08655 ANIA_09458 ANIA_10391 ANIA_10600 ANIA_10623 ANIA_10961 ANIA_11197 ANIA_11818
0.00411082	26	743	2.24766	Regulation of RNA biosynthetic process	http://amigo.geneontology.org/amigo/term/GO:2001141	ANIA_00197 ANIA_00902 ANIA_01867 ANIA_03290 ANIA_04123 ANIA_04626 ANIA_05274 ANIA_05775 ANIA_06569 ANIA_06747 ANIA_06846 ANIA_07896 ANIA_08079 ANIA_08092 ANIA_08103 ANIA_08164 ANIA_08355 ANIA_08426 ANIA_08655 ANIA_09458 ANIA_10391 ANIA_10600 ANIA_10623 ANIA_10961 ANIA_11197 ANIA_11818
0.00411082	26	741	2.25382	Regulation of transcription, DNA-templated	http://amigo.geneontology.org/amigo/term/GO:0006355	ANIA_00197 ANIA_00902 ANIA_01867 ANIA_03290 ANIA_04123 ANIA_04626 ANIA_05274 ANIA_05775 ANIA_06569 ANIA_06747 ANIA_06846 ANIA_07896 ANIA_08079 ANIA_08092 ANIA_08103 ANIA_08164 ANIA_08355 ANIA_08426 ANIA_08655 ANIA_09458 ANIA_10391 ANIA_10600 ANIA_10623 ANIA_10961 ANIA_11197 ANIA_11818
0.00610383	31	996	1.99561	Regulation of cellular metabolic process	http://amigo.geneontology.org/amigo/term/GO:0031323	ANIA_00197 ANIA_00256 ANIA_00902 ANIA_01867 ANIA_02160 ANIA_03290 ANIA_04123 ANIA_04626 ANIA_05274 ANIA_05708 ANIA_05775 ANIA_06569 ANIA_06747 ANIA_06846 ANIA_07896 ANIA_08079 ANIA_08092 ANIA_08103 ANIA_08164 ANIA_08355 ANIA_08426 ANIA_08655 ANIA_08777 ANIA_09458 ANIA_10138 ANIA_10391 ANIA_10600 ANIA_10623 ANIA_10961 ANIA_11197 ANIA_11818
0.00610383	3	7	27.1201	Primary alcohol catabolic process	http://amigo.geneontology.org/amigo/term/GO:0034310	ANIA_08979 ANIA_08980 ANIA_08981
0.00610383	3	7	27.1201	Ethanol catabolic process	http://amigo.geneontology.org/amigo/term/GO:0006068	ANIA_08979 ANIA_08980 ANIA_08981
0.00653877	28	864	2.07963	Regulation of cellular biosynthetic process	http://amigo.geneontology.org/amigo/term/GO:0031326	ANIA_00197 ANIA_00256 ANIA_00902 ANIA_01867 ANIA_02160 ANIA_03290 ANIA_04123 ANIA_04626 ANIA_05274 ANIA_05775 ANIA_06569 ANIA_06747 ANIA_06846 ANIA_07896 ANIA_08079 ANIA_08092 ANIA_08103 ANIA_08164 ANIA_08355 ANIA_08426 ANIA_08655 ANIA_09458 ANIA_10391 ANIA_10600 ANIA_10623 ANIA_10961 ANIA_11197 ANIA_11818
0.00666924	30	962	2.00043	Regulation of nitrogen compound metabolic process	http://amigo.geneontology.org/amigo/term/GO:0051171	ANIA_00197 ANIA_00256 ANIA_00902 ANIA_01867 ANIA_03290 ANIA_04123 ANIA_04626 ANIA_05274 ANIA_05708 ANIA_05775 ANIA_06569 ANIA_06747 ANIA_06846 ANIA_07896 ANIA_08079 ANIA_08092 ANIA_08103 ANIA_08164 ANIA_08355 ANIA_08426 ANIA_08655 ANIA_08777 ANIA_09458 ANIA_10138 ANIA_10391 ANIA_10600 ANIA_10623 ANIA_10961 ANIA_11197 ANIA_11818
0.00666924	28	869	2.0675	Regulation of biosynthetic process	http://amigo.geneontology.org/amigo/term/GO:0009889	ANIA_00197 ANIA_00256 ANIA_00902 ANIA_01867 ANIA_02160 ANIA_03290 ANIA_04123 ANIA_04626 ANIA_05274 ANIA_05775 ANIA_06569 ANIA_06747 ANIA_06846 ANIA_07896 ANIA_08079 ANIA_08092 ANIA_08103 ANIA_08164 ANIA_08355 ANIA_08426 ANIA_08655 ANIA_09458 ANIA_10391 ANIA_10600 ANIA_10623 ANIA_10961 ANIA_11197 ANIA_11818
0.00757235	4	20	13.3222	Kinesin complex	http://amigo.geneontology.org/amigo/term/GO:0005871	ANIA_01580 ANIA_03970 ANIA_08322 ANIA_09426
0.00786571	27	837	2.07099	Regulation of cellular macromolecule biosynthetic process	http://amigo.geneontology.org/amigo/term/GO:2000112	ANIA_00197 ANIA_00902 ANIA_01867 ANIA_02160 ANIA_03290 ANIA_04123 ANIA_04626 ANIA_05274 ANIA_05775 ANIA_06569 ANIA_06747 ANIA_06846 ANIA_07896 ANIA_08079 ANIA_08092 ANIA_08103 ANIA_08164 ANIA_08355 ANIA_08426 ANIA_08655 ANIA_09458 ANIA_10391 ANIA_10600 ANIA_10623 ANIA_10961 ANIA_11197 ANIA_11818
0.00801417	26	795	2.10126	Regulation of RNA metabolic process	http://amigo.geneontology.org/amigo/term/GO:0051252	ANIA_00197 ANIA_00902 ANIA_01867 ANIA_03290 ANIA_04123 ANIA_04626 ANIA_05274 ANIA_05775 ANIA_06569 ANIA_06747 ANIA_06846 ANIA_07896 ANIA_08079 ANIA_08092 ANIA_08103 ANIA_08164 ANIA_08355 ANIA_08426 ANIA_08655 ANIA_09458 ANIA_10391 ANIA_10600 ANIA_10623 ANIA_10961 ANIA_11197 ANIA_11818
0.00803525	27	842	2.05851	Regulation of macromolecule biosynthetic process	http://amigo.geneontology.org/amigo/term/GO:0010556	ANIA_00197 ANIA_00902 ANIA_01867 ANIA_02160 ANIA_03290 ANIA_04123 ANIA_04626 ANIA_05274 ANIA_05775 ANIA_06569 ANIA_06747 ANIA_06846 ANIA_07896 ANIA_08079 ANIA_08092 ANIA_08103 ANIA_08164 ANIA_08355 ANIA_08426 ANIA_08655 ANIA_09458 ANIA_10391 ANIA_10600 ANIA_10623 ANIA_10961 ANIA_11197 ANIA_11818
0.00873688	26	803	2.08001	Transcription, DNA-templated	http://amigo.geneontology.org/amigo/term/GO:0006351	ANIA_00197 ANIA_00902 ANIA_01867 ANIA_03290 ANIA_04123 ANIA_04626 ANIA_05274 ANIA_05775 ANIA_06569 ANIA_06747 ANIA_06846 ANIA_07896 ANIA_08079 ANIA_08092 ANIA_08103 ANIA_08164 ANIA_08355 ANIA_08426 ANIA_08655 ANIA_09458 ANIA_10391 ANIA_10600 ANIA_10623 ANIA_10961 ANIA_11197 ANIA_11818
0.00877701	26	805	2.07476	Nucleic acid-templated transcription	http://amigo.geneontology.org/amigo/term/GO:0097659	ANIA_00197 ANIA_00902 ANIA_01867 ANIA_03290 ANIA_04123 ANIA_04626 ANIA_05274 ANIA_05775 ANIA_06569 ANIA_06747 ANIA_06846 ANIA_07896 ANIA_08079 ANIA_08092 ANIA_08103 ANIA_08164 ANIA_08355 ANIA_08426 ANIA_08655 ANIA_09458 ANIA_10391 ANIA_10600 ANIA_10623 ANIA_10961 ANIA_11197 ANIA_11818
0.0091266	26	812	2.05661	Regulation of nucleobase-containing compound metabolic process	http://amigo.geneontology.org/amigo/term/GO:0019219	ANIA_00197 ANIA_00902 ANIA_01867 ANIA_03290 ANIA_04123 ANIA_04626 ANIA_05274 ANIA_05775 ANIA_06569 ANIA_06747 ANIA_06846 ANIA_07896 ANIA_08079 ANIA_08092 ANIA_08103 ANIA_08164 ANIA_08355 ANIA_08426 ANIA_08655 ANIA_09458 ANIA_10391 ANIA_10600 ANIA_10623 ANIA_10961 ANIA_11197 ANIA_11818
0.0091266	26	810	2.06176	RNA biosynthetic process	http://amigo.geneontology.org/amigo/term/GO:0032774	ANIA_00197 ANIA_00902 ANIA_01867 ANIA_03290 ANIA_04123 ANIA_04626 ANIA_05274 ANIA_05775 ANIA_06569 ANIA_06747 ANIA_06846 ANIA_07896 ANIA_08079 ANIA_08092 ANIA_08103 ANIA_08164 ANIA_08355 ANIA_08426 ANIA_08655 ANIA_09458 ANIA_10391 ANIA_10600 ANIA_10623 ANIA_10961 ANIA_11197 ANIA_11818
0.0091266	5	39	8.32635	Organic hydroxy compound catabolic process	http://amigo.geneontology.org/amigo/term/GO:1901616	ANIA_04792 ANIA_07068 ANIA_08979 ANIA_08980 ANIA_08981
0.0123505	24	738	2.08903	Transition metal ion binding	http://amigo.geneontology.org/amigo/term/GO:0046914	ANIA_00197 ANIA_00902 ANIA_03290 ANIA_04123 ANIA_04626 ANIA_05274 ANIA_05775 ANIA_06747 ANIA_06846 ANIA_07896 ANIA_08079 ANIA_08103 ANIA_08164 ANIA_08355 ANIA_08358 ANIA_08426 ANIA_08655 ANIA_08979 ANIA_09458 ANIA_10600 ANIA_10623 ANIA_10961 ANIA_11197 ANIA_11818
0.0137793	4	25	10.5467	Microtubule motor activity	http://amigo.geneontology.org/amigo/term/GO:0003777	ANIA_01580 ANIA_03970 ANIA_08322 ANIA_09426
0.014205	31	1078	1.84369	Regulation of metabolic process	http://amigo.geneontology.org/amigo/term/GO:0019222	ANIA_00197 ANIA_00256 ANIA_00902 ANIA_01867 ANIA_02160 ANIA_03290 ANIA_04123 ANIA_04626 ANIA_05274 ANIA_05708 ANIA_05775 ANIA_06569 ANIA_06747 ANIA_06846 ANIA_07896 ANIA_08079 ANIA_08092 ANIA_08103 ANIA_08164 ANIA_08355 ANIA_08426 ANIA_08655 ANIA_08777 ANIA_09458 ANIA_10138 ANIA_10391 ANIA_10600 ANIA_10623 ANIA_10961 ANIA_11197 ANIA_11818
0.019237	2	3	42.1868	NAD+ ADP-ribosyltransferase activity	http://amigo.geneontology.org/amigo/term/GO:0003950	ANIA_00482 ANIA_03129
0.0201561	4	28	9.37485	Cytoskeletal motor activity	http://amigo.geneontology.org/amigo/term/GO:0003774	ANIA_01580 ANIA_03970 ANIA_08322 ANIA_09426
0.0234496	28	969	1.8534	Regulation of primary metabolic process	http://amigo.geneontology.org/amigo/term/GO:0080090	ANIA_00197 ANIA_00902 ANIA_01867 ANIA_03290 ANIA_04123 ANIA_04626 ANIA_05274 ANIA_05708 ANIA_05775 ANIA_06569 ANIA_06747 ANIA_06846 ANIA_07896 ANIA_08079 ANIA_08092 ANIA_08103 ANIA_08164 ANIA_08355 ANIA_08426 ANIA_08655 ANIA_09458 ANIA_10138 ANIA_10391 ANIA_10600 ANIA_10623 ANIA_10961 ANIA_11197 ANIA_11818
0.0237561	3	13	14.6031	ADP binding	http://amigo.geneontology.org/amigo/term/GO:0043531	ANIA_01580 ANIA_08322 ANIA_09426
0.0261383	24	791	1.9546	DNA binding	http://amigo.geneontology.org/amigo/term/GO:0003677	ANIA_00197 ANIA_00902 ANIA_03290 ANIA_04123 ANIA_04519 ANIA_04626 ANIA_05274 ANIA_05775 ANIA_06569 ANIA_06747 ANIA_06846 ANIA_07896 ANIA_08079 ANIA_08103 ANIA_08164 ANIA_08355 ANIA_08426 ANIA_08655 ANIA_09458 ANIA_10600 ANIA_10623 ANIA_10961 ANIA_11197 ANIA_11818
0.0286885	29	1036	1.79562	Regulation of macromolecule metabolic process	http://amigo.geneontology.org/amigo/term/GO:0060255	ANIA_00197 ANIA_00902 ANIA_01867 ANIA_02160 ANIA_03290 ANIA_04123 ANIA_04626 ANIA_05274 ANIA_05708 ANIA_05775 ANIA_06569 ANIA_06747 ANIA_06846 ANIA_07896 ANIA_08079 ANIA_08092 ANIA_08103 ANIA_08164 ANIA_08355 ANIA_08426 ANIA_08655 ANIA_09458 ANIA_10138 ANIA_10391 ANIA_10600 ANIA_10623 ANIA_10961 ANIA_11197 ANIA_11818
0.0342889	3	16	12.6561	Ethanol metabolic process	http://amigo.geneontology.org/amigo/term/GO:0006067	ANIA_08979 ANIA_08980 ANIA_08981
0.040745	3	16	11.865	Amidase activity	http://amigo.geneontology.org/amigo/term/GO:0004040	ANIA_02662 ANIA_08653 ANIA_08777
0.0420462	26	919	1.81599	Regulation of gene expression	http://amigo.geneontology.org/amigo/term/GO:0010468	ANIA_00197 ANIA_00902 ANIA_01867 ANIA_03290 ANIA_04123 ANIA_04626 ANIA_05274 ANIA_05775 ANIA_06569 ANIA_06747 ANIA_06846 ANIA_07896 ANIA_08079 ANIA_08092 ANIA_08103 ANIA_08164 ANIA_08355 ANIA_08426 ANIA_08655 ANIA_09458 ANIA_10391 ANIA_10600 ANIA_10623 ANIA_10961 ANIA_11197 ANIA_11818
0.048101	4	37	7.03114	Negative regulation of molecular function	http://amigo.geneontology.org/amigo/term/GO:0044092	ANIA_01867 ANIA_05708 ANIA_08079 ANIA_10138
0.048101	2	5	25.3121	Lactate catabolic process	http://amigo.geneontology.org/amigo/term/GO:1903457	ANIA_04792 ANIA_07068
0.048101	4	37	7.03114	Microtubule associated complex	http://amigo.geneontology.org/amigo/term/GO:0005875	ANIA_01580 ANIA_03970 ANIA_08322 ANIA_09426
Sorbitol vs. Untreated	A. nidulans	THS30	downregulated genes	DEG; log2FC<-1
Enrichment FDR	nGenes	Pathway Genes	Fold Enrichment	Pathway	URL	Genes
2.035e-12	83	352	2.4291	Host cellular component	http://amigo.geneontology.org/amigo/term/GO:0018995	ANIA_00094 ANIA_00096 ANIA_00148 ANIA_00197 ANIA_00388 ANIA_00507 ANIA_00680 ANIA_00902 ANIA_00937 ANIA_01584 ANIA_01599 ANIA_01729 ANIA_02324 ANIA_02650 ANIA_02725 ANIA_02782 ANIA_03120 ANIA_03217 ANIA_03269 ANIA_03280 ANIA_03290 ANIA_03385 ANIA_03868 ANIA_03900 ANIA_03986 ANIA_04123 ANIA_04175 ANIA_04626 ANIA_05070 ANIA_05274 ANIA_05412 ANIA_05431 ANIA_05609 ANIA_05775 ANIA_05808 ANIA_05870 ANI…
2.035e-12	83	352	2.4291	Host cell part	http://amigo.geneontology.org/amigo/term/GO:0033643	ANIA_00094 ANIA_00096 ANIA_00148 ANIA_00197 ANIA_00388 ANIA_00507 ANIA_00680 ANIA_00902 ANIA_00937 ANIA_01584 ANIA_01599 ANIA_01729 ANIA_02324 ANIA_02650 ANIA_02725 ANIA_02782 ANIA_03120 ANIA_03217 ANIA_03269 ANIA_03280 ANIA_03290 ANIA_03385 ANIA_03868 ANIA_03900 ANIA_03986 ANIA_04123 ANIA_04175 ANIA_04626 ANIA_05070 ANIA_05274 ANIA_05412 ANIA_05431 ANIA_05609 ANIA_05775 ANIA_05808 ANIA_05870 ANI…
2.035e-12	83	352	2.4291	Host intracellular part	http://amigo.geneontology.org/amigo/term/GO:0033646	ANIA_00094 ANIA_00096 ANIA_00148 ANIA_00197 ANIA_00388 ANIA_00507 ANIA_00680 ANIA_00902 ANIA_00937 ANIA_01584 ANIA_01599 ANIA_01729 ANIA_02324 ANIA_02650 ANIA_02725 ANIA_02782 ANIA_03120 ANIA_03217 ANIA_03269 ANIA_03280 ANIA_03290 ANIA_03385 ANIA_03868 ANIA_03900 ANIA_03986 ANIA_04123 ANIA_04175 ANIA_04626 ANIA_05070 ANIA_05274 ANIA_05412 ANIA_05431 ANIA_05609 ANIA_05775 ANIA_05808 ANIA_05870 ANI…
2.035e-12	83	351	2.43608	Host intracellular organelle	http://amigo.geneontology.org/amigo/term/GO:0033647	ANIA_00094 ANIA_00096 ANIA_00148 ANIA_00197 ANIA_00388 ANIA_00507 ANIA_00680 ANIA_00902 ANIA_00937 ANIA_01584 ANIA_01599 ANIA_01729 ANIA_02324 ANIA_02650 ANIA_02725 ANIA_02782 ANIA_03120 ANIA_03217 ANIA_03269 ANIA_03280 ANIA_03290 ANIA_03385 ANIA_03868 ANIA_03900 ANIA_03986 ANIA_04123 ANIA_04175 ANIA_04626 ANIA_05070 ANIA_05274 ANIA_05412 ANIA_05431 ANIA_05609 ANIA_05775 ANIA_05808 ANIA_05870 ANI…
2.035e-12	83	351	2.43608	Host intracellular membrane-bounded organelle	http://amigo.geneontology.org/amigo/term/GO:0033648	ANIA_00094 ANIA_00096 ANIA_00148 ANIA_00197 ANIA_00388 ANIA_00507 ANIA_00680 ANIA_00902 ANIA_00937 ANIA_01584 ANIA_01599 ANIA_01729 ANIA_02324 ANIA_02650 ANIA_02725 ANIA_02782 ANIA_03120 ANIA_03217 ANIA_03269 ANIA_03280 ANIA_03290 ANIA_03385 ANIA_03868 ANIA_03900 ANIA_03986 ANIA_04123 ANIA_04175 ANIA_04626 ANIA_05070 ANIA_05274 ANIA_05412 ANIA_05431 ANIA_05609 ANIA_05775 ANIA_05808 ANIA_05870 ANI…
2.035e-12	83	351	2.43608	Host cell nucleus	http://amigo.geneontology.org/amigo/term/GO:0042025	ANIA_00094 ANIA_00096 ANIA_00148 ANIA_00197 ANIA_00388 ANIA_00507 ANIA_00680 ANIA_00902 ANIA_00937 ANIA_01584 ANIA_01599 ANIA_01729 ANIA_02324 ANIA_02650 ANIA_02725 ANIA_02782 ANIA_03120 ANIA_03217 ANIA_03269 ANIA_03280 ANIA_03290 ANIA_03385 ANIA_03868 ANIA_03900 ANIA_03986 ANIA_04123 ANIA_04175 ANIA_04626 ANIA_05070 ANIA_05274 ANIA_05412 ANIA_05431 ANIA_05609 ANIA_05775 ANIA_05808 ANIA_05870 ANI…
2.035e-12	83	352	2.4291	Host intracellular region	http://amigo.geneontology.org/amigo/term/GO:0043656	ANIA_00094 ANIA_00096 ANIA_00148 ANIA_00197 ANIA_00388 ANIA_00507 ANIA_00680 ANIA_00902 ANIA_00937 ANIA_01584 ANIA_01599 ANIA_01729 ANIA_02324 ANIA_02650 ANIA_02725 ANIA_02782 ANIA_03120 ANIA_03217 ANIA_03269 ANIA_03280 ANIA_03290 ANIA_03385 ANIA_03868 ANIA_03900 ANIA_03986 ANIA_04123 ANIA_04175 ANIA_04626 ANIA_05070 ANIA_05274 ANIA_05412 ANIA_05431 ANIA_05609 ANIA_05775 ANIA_05808 ANIA_05870 ANI…
2.035e-12	83	352	2.4291	Host cell	http://amigo.geneontology.org/amigo/term/GO:0043657	ANIA_00094 ANIA_00096 ANIA_00148 ANIA_00197 ANIA_00388 ANIA_00507 ANIA_00680 ANIA_00902 ANIA_00937 ANIA_01584 ANIA_01599 ANIA_01729 ANIA_02324 ANIA_02650 ANIA_02725 ANIA_02782 ANIA_03120 ANIA_03217 ANIA_03269 ANIA_03280 ANIA_03290 ANIA_03385 ANIA_03868 ANIA_03900 ANIA_03986 ANIA_04123 ANIA_04175 ANIA_04626 ANIA_05070 ANIA_05274 ANIA_05412 ANIA_05431 ANIA_05609 ANIA_05775 ANIA_05808 ANIA_05870 ANI…
2.20467e-12	92	415	2.29751	DNA-binding transcription factor activity, RNA polymerase II-specific	http://amigo.geneontology.org/amigo/term/GO:0000981	ANIA_00094 ANIA_00096 ANIA_00148 ANIA_00197 ANIA_00388 ANIA_00486 ANIA_00507 ANIA_00680 ANIA_00902 ANIA_00937 ANIA_01265 ANIA_01584 ANIA_01599 ANIA_01729 ANIA_02324 ANIA_02650 ANIA_02652 ANIA_02725 ANIA_02782 ANIA_03120 ANIA_03217 ANIA_03269 ANIA_03280 ANIA_03290 ANIA_03385 ANIA_03868 ANIA_03900 ANIA_03986 ANIA_04013 ANIA_04035 ANIA_04123 ANIA_04175 ANIA_04626 ANIA_04720 ANIA_05070 ANIA_05274 ANI…
1.90323e-11	141	791	1.85111	DNA binding	http://amigo.geneontology.org/amigo/term/GO:0003677	ANIA_00094 ANIA_00096 ANIA_00126 ANIA_00138 ANIA_00148 ANIA_00197 ANIA_00388 ANIA_00486 ANIA_00507 ANIA_00582 ANIA_00680 ANIA_00719 ANIA_00902 ANIA_00937 ANIA_01265 ANIA_01435 ANIA_01479 ANIA_01584 ANIA_01599 ANIA_01729 ANIA_01843 ANIA_01956 ANIA_02141 ANIA_02324 ANIA_02637 ANIA_02650 ANIA_02652 ANIA_02725 ANIA_02782 ANIA_02969 ANIA_03120 ANIA_03217 ANIA_03269 ANIA_03280 ANIA_03290 ANIA_03385 ANI…
4.60514e-11	104	523	2.06663	Zinc ion binding	http://amigo.geneontology.org/amigo/term/GO:0008270	ANIA_00094 ANIA_00096 ANIA_00148 ANIA_00197 ANIA_00388 ANIA_00486 ANIA_00507 ANIA_00680 ANIA_00902 ANIA_00937 ANIA_01584 ANIA_01599 ANIA_01729 ANIA_02195 ANIA_02324 ANIA_02334 ANIA_02650 ANIA_02725 ANIA_02782 ANIA_03120 ANIA_03217 ANIA_03269 ANIA_03280 ANIA_03290 ANIA_03385 ANIA_03629 ANIA_03868 ANIA_03900 ANIA_03986 ANIA_04001 ANIA_04013 ANIA_04035 ANIA_04123 ANIA_04175 ANIA_04626 ANIA_04821 ANI…
5.59995e-11	95	461	2.14199	DNA-binding transcription factor activity	http://amigo.geneontology.org/amigo/term/GO:0003700	ANIA_00094 ANIA_00096 ANIA_00148 ANIA_00197 ANIA_00388 ANIA_00486 ANIA_00507 ANIA_00680 ANIA_00902 ANIA_00937 ANIA_01265 ANIA_01584 ANIA_01599 ANIA_01729 ANIA_02324 ANIA_02650 ANIA_02652 ANIA_02725 ANIA_02782 ANIA_03120 ANIA_03217 ANIA_03269 ANIA_03280 ANIA_03290 ANIA_03385 ANIA_03578 ANIA_03868 ANIA_03900 ANIA_03986 ANIA_04013 ANIA_04035 ANIA_04123 ANIA_04175 ANIA_04626 ANIA_04720 ANIA_05070 ANI…
1.48367e-10	114	604	1.9504	Regulation of transcription by RNA polymerase II	http://amigo.geneontology.org/amigo/term/GO:0006357	ANIA_00094 ANIA_00096 ANIA_00138 ANIA_00148 ANIA_00197 ANIA_00388 ANIA_00486 ANIA_00507 ANIA_00680 ANIA_00719 ANIA_00902 ANIA_00937 ANIA_01265 ANIA_01584 ANIA_01599 ANIA_01729 ANIA_01867 ANIA_02324 ANIA_02650 ANIA_02652 ANIA_02725 ANIA_02782 ANIA_03120 ANIA_03217 ANIA_03269 ANIA_03280 ANIA_03290 ANIA_03385 ANIA_03868 ANIA_03900 ANIA_03986 ANIA_04001 ANIA_04013 ANIA_04035 ANIA_04123 ANIA_04175 ANI…
7.02112e-10	101	524	1.99924	Transcription regulator activity	http://amigo.geneontology.org/amigo/term/GO:0140110	ANIA_00094 ANIA_00096 ANIA_00148 ANIA_00197 ANIA_00388 ANIA_00486 ANIA_00507 ANIA_00680 ANIA_00719 ANIA_00902 ANIA_00937 ANIA_01265 ANIA_01584 ANIA_01599 ANIA_01729 ANIA_02324 ANIA_02650 ANIA_02652 ANIA_02725 ANIA_02782 ANIA_03120 ANIA_03217 ANIA_03269 ANIA_03280 ANIA_03290 ANIA_03385 ANIA_03578 ANIA_03868 ANIA_03900 ANIA_03986 ANIA_04013 ANIA_04035 ANIA_04123 ANIA_04175 ANIA_04377 ANIA_04626 ANI…
1.12352e-09	136	795	1.7718	Regulation of RNA metabolic process	http://amigo.geneontology.org/amigo/term/GO:0051252	ANIA_00094 ANIA_00096 ANIA_00134 ANIA_00138 ANIA_00148 ANIA_00197 ANIA_00388 ANIA_00486 ANIA_00507 ANIA_00554 ANIA_00680 ANIA_00719 ANIA_00902 ANIA_00937 ANIA_01205 ANIA_01265 ANIA_01584 ANIA_01599 ANIA_01729 ANIA_01867 ANIA_02324 ANIA_02513 ANIA_02650 ANIA_02652 ANIA_02725 ANIA_02782 ANIA_03120 ANIA_03217 ANIA_03269 ANIA_03280 ANIA_03290 ANIA_03385 ANIA_03578 ANIA_03868 ANIA_03900 ANIA_03986 ANI…
1.2055e-09	138	812	1.7597	Regulation of nucleobase-containing compound metabolic process	http://amigo.geneontology.org/amigo/term/GO:0019219	ANIA_00094 ANIA_00096 ANIA_00134 ANIA_00138 ANIA_00148 ANIA_00197 ANIA_00388 ANIA_00486 ANIA_00507 ANIA_00554 ANIA_00680 ANIA_00719 ANIA_00902 ANIA_00937 ANIA_01205 ANIA_01265 ANIA_01584 ANIA_01599 ANIA_01729 ANIA_01867 ANIA_02141 ANIA_02324 ANIA_02513 ANIA_02650 ANIA_02652 ANIA_02725 ANIA_02782 ANIA_03120 ANIA_03217 ANIA_03269 ANIA_03280 ANIA_03290 ANIA_03385 ANIA_03578 ANIA_03619 ANIA_03868 ANI…
1.42229e-09	115	634	1.87337	Transcription by RNA polymerase II	http://amigo.geneontology.org/amigo/term/GO:0006366	ANIA_00094 ANIA_00096 ANIA_00138 ANIA_00148 ANIA_00197 ANIA_00388 ANIA_00486 ANIA_00507 ANIA_00680 ANIA_00719 ANIA_00902 ANIA_00937 ANIA_01265 ANIA_01584 ANIA_01599 ANIA_01729 ANIA_01867 ANIA_02324 ANIA_02650 ANIA_02652 ANIA_02725 ANIA_02782 ANIA_03120 ANIA_03217 ANIA_03269 ANIA_03280 ANIA_03290 ANIA_03385 ANIA_03868 ANIA_03900 ANIA_03986 ANIA_04001 ANIA_04013 ANIA_04035 ANIA_04123 ANIA_04175 ANI…
9.87886e-09	126	741	1.76054	Regulation of transcription, DNA-templated	http://amigo.geneontology.org/amigo/term/GO:0006355	ANIA_00094 ANIA_00096 ANIA_00134 ANIA_00138 ANIA_00148 ANIA_00197 ANIA_00388 ANIA_00486 ANIA_00507 ANIA_00554 ANIA_00680 ANIA_00719 ANIA_00902 ANIA_00937 ANIA_01205 ANIA_01265 ANIA_01584 ANIA_01599 ANIA_01729 ANIA_01867 ANIA_02324 ANIA_02513 ANIA_02650 ANIA_02652 ANIA_02725 ANIA_02782 ANIA_03120 ANIA_03217 ANIA_03269 ANIA_03280 ANIA_03290 ANIA_03385 ANIA_03578 ANIA_03868 ANIA_03900 ANIA_03986 ANI…
1.07261e-08	126	743	1.75574	Regulation of nucleic acid-templated transcription	http://amigo.geneontology.org/amigo/term/GO:1903506	ANIA_00094 ANIA_00096 ANIA_00134 ANIA_00138 ANIA_00148 ANIA_00197 ANIA_00388 ANIA_00486 ANIA_00507 ANIA_00554 ANIA_00680 ANIA_00719 ANIA_00902 ANIA_00937 ANIA_01205 ANIA_01265 ANIA_01584 ANIA_01599 ANIA_01729 ANIA_01867 ANIA_02324 ANIA_02513 ANIA_02650 ANIA_02652 ANIA_02725 ANIA_02782 ANIA_03120 ANIA_03217 ANIA_03269 ANIA_03280 ANIA_03290 ANIA_03385 ANIA_03578 ANIA_03868 ANIA_03900 ANIA_03986 ANI…
1.07261e-08	126	743	1.75574	Regulation of RNA biosynthetic process	http://amigo.geneontology.org/amigo/term/GO:2001141	ANIA_00094 ANIA_00096 ANIA_00134 ANIA_00138 ANIA_00148 ANIA_00197 ANIA_00388 ANIA_00486 ANIA_00507 ANIA_00554 ANIA_00680 ANIA_00719 ANIA_00902 ANIA_00937 ANIA_01205 ANIA_01265 ANIA_01584 ANIA_01599 ANIA_01729 ANIA_01867 ANIA_02324 ANIA_02513 ANIA_02650 ANIA_02652 ANIA_02725 ANIA_02782 ANIA_03120 ANIA_03217 ANIA_03269 ANIA_03280 ANIA_03290 ANIA_03385 ANIA_03578 ANIA_03868 ANIA_03900 ANIA_03986 ANI…
1.32077e-08	153	962	1.64325	Regulation of nitrogen compound metabolic process	http://amigo.geneontology.org/amigo/term/GO:0051171	ANIA_00094 ANIA_00096 ANIA_00134 ANIA_00138 ANIA_00148 ANIA_00197 ANIA_00256 ANIA_00388 ANIA_00486 ANIA_00507 ANIA_00554 ANIA_00680 ANIA_00719 ANIA_00902 ANIA_00937 ANIA_01205 ANIA_01265 ANIA_01584 ANIA_01599 ANIA_01665 ANIA_01729 ANIA_01867 ANIA_02141 ANIA_02324 ANIA_02482 ANIA_02513 ANIA_02650 ANIA_02652 ANIA_02725 ANIA_02782 ANIA_03095 ANIA_03120 ANIA_03217 ANIA_03269 ANIA_03280 ANIA_03290 ANI…
1.41338e-08	157	996	1.62801	Regulation of cellular metabolic process	http://amigo.geneontology.org/amigo/term/GO:0031323	ANIA_00094 ANIA_00096 ANIA_00120 ANIA_00134 ANIA_00138 ANIA_00148 ANIA_00197 ANIA_00256 ANIA_00388 ANIA_00439 ANIA_00486 ANIA_00507 ANIA_00554 ANIA_00680 ANIA_00719 ANIA_00902 ANIA_00937 ANIA_01205 ANIA_01265 ANIA_01584 ANIA_01599 ANIA_01665 ANIA_01729 ANIA_01867 ANIA_02141 ANIA_02160 ANIA_02324 ANIA_02425 ANIA_02482 ANIA_02513 ANIA_02650 ANIA_02652 ANIA_02725 ANIA_02782 ANIA_03095 ANIA_03120 ANI…
3.25445e-08	146	919	1.64414	Regulation of gene expression	http://amigo.geneontology.org/amigo/term/GO:0010468	ANIA_00094 ANIA_00096 ANIA_00119 ANIA_00134 ANIA_00138 ANIA_00148 ANIA_00197 ANIA_00388 ANIA_00486 ANIA_00507 ANIA_00554 ANIA_00680 ANIA_00719 ANIA_00902 ANIA_00937 ANIA_01205 ANIA_01265 ANIA_01584 ANIA_01599 ANIA_01665 ANIA_01729 ANIA_01867 ANIA_02153 ANIA_02324 ANIA_02482 ANIA_02513 ANIA_02650 ANIA_02652 ANIA_02725 ANIA_02782 ANIA_03120 ANIA_03217 ANIA_03269 ANIA_03280 ANIA_03290 ANIA_03385 ANI…
3.25445e-08	136	837	1.68171	Regulation of cellular macromolecule biosynthetic process	http://amigo.geneontology.org/amigo/term/GO:2000112	ANIA_00094 ANIA_00096 ANIA_00134 ANIA_00138 ANIA_00148 ANIA_00197 ANIA_00388 ANIA_00486 ANIA_00507 ANIA_00554 ANIA_00680 ANIA_00719 ANIA_00902 ANIA_00937 ANIA_01205 ANIA_01265 ANIA_01584 ANIA_01599 ANIA_01665 ANIA_01729 ANIA_01867 ANIA_02141 ANIA_02160 ANIA_02324 ANIA_02425 ANIA_02482 ANIA_02513 ANIA_02650 ANIA_02652 ANIA_02725 ANIA_02782 ANIA_03120 ANIA_03217 ANIA_03269 ANIA_03280 ANIA_03290 ANI…
3.56447e-08	152	969	1.62058	Regulation of primary metabolic process	http://amigo.geneontology.org/amigo/term/GO:0080090	ANIA_00094 ANIA_00096 ANIA_00134 ANIA_00138 ANIA_00148 ANIA_00197 ANIA_00388 ANIA_00486 ANIA_00507 ANIA_00554 ANIA_00680 ANIA_00719 ANIA_00902 ANIA_00937 ANIA_01205 ANIA_01265 ANIA_01584 ANIA_01599 ANIA_01665 ANIA_01729 ANIA_01867 ANIA_02141 ANIA_02324 ANIA_02425 ANIA_02482 ANIA_02513 ANIA_02650 ANIA_02652 ANIA_02725 ANIA_02782 ANIA_03095 ANIA_03120 ANIA_03217 ANIA_03269 ANIA_03280 ANIA_03290 ANI…
3.56447e-08	71	346	2.1392	Sequence-specific DNA binding	http://amigo.geneontology.org/amigo/term/GO:0043565	ANIA_00094 ANIA_00148 ANIA_00197 ANIA_00388 ANIA_00486 ANIA_00680 ANIA_00937 ANIA_01265 ANIA_01435 ANIA_01584 ANIA_01599 ANIA_02141 ANIA_02324 ANIA_02650 ANIA_02652 ANIA_03217 ANIA_03269 ANIA_03280 ANIA_03385 ANIA_03619 ANIA_03986 ANIA_04001 ANIA_04013 ANIA_04123 ANIA_04175 ANIA_04720 ANIA_04750 ANIA_04821 ANIA_05070 ANIA_05274 ANIA_05431 ANIA_05609 ANIA_05892 ANIA_05924 ANIA_06706 ANIA_06846 ANI…
4.2325e-08	136	842	1.67159	Regulation of macromolecule biosynthetic process	http://amigo.geneontology.org/amigo/term/GO:0010556	ANIA_00094 ANIA_00096 ANIA_00134 ANIA_00138 ANIA_00148 ANIA_00197 ANIA_00388 ANIA_00486 ANIA_00507 ANIA_00554 ANIA_00680 ANIA_00719 ANIA_00902 ANIA_00937 ANIA_01205 ANIA_01265 ANIA_01584 ANIA_01599 ANIA_01665 ANIA_01729 ANIA_01867 ANIA_02141 ANIA_02160 ANIA_02324 ANIA_02425 ANIA_02482 ANIA_02513 ANIA_02650 ANIA_02652 ANIA_02725 ANIA_02782 ANIA_03120 ANIA_03217 ANIA_03269 ANIA_03280 ANIA_03290 ANI…
9.17031e-08	122	738	1.70933	Transition metal ion binding	http://amigo.geneontology.org/amigo/term/GO:0046914	ANIA_00042 ANIA_00094 ANIA_00096 ANIA_00148 ANIA_00197 ANIA_00388 ANIA_00486 ANIA_00507 ANIA_00556 ANIA_00680 ANIA_00901 ANIA_00902 ANIA_00937 ANIA_01301 ANIA_01584 ANIA_01599 ANIA_01729 ANIA_01967 ANIA_02195 ANIA_02324 ANIA_02334 ANIA_02650 ANIA_02725 ANIA_02782 ANIA_03120 ANIA_03217 ANIA_03269 ANIA_03280 ANIA_03290 ANIA_03349 ANIA_03385 ANIA_03497 ANIA_03629 ANIA_03868 ANIA_03900 ANIA_03986 ANI…
9.62532e-08	138	869	1.6428	Regulation of biosynthetic process	http://amigo.geneontology.org/amigo/term/GO:0009889	ANIA_00094 ANIA_00096 ANIA_00134 ANIA_00138 ANIA_00148 ANIA_00197 ANIA_00256 ANIA_00388 ANIA_00486 ANIA_00507 ANIA_00554 ANIA_00680 ANIA_00719 ANIA_00902 ANIA_00937 ANIA_01205 ANIA_01265 ANIA_01584 ANIA_01599 ANIA_01665 ANIA_01729 ANIA_01867 ANIA_02141 ANIA_02160 ANIA_02324 ANIA_02425 ANIA_02482 ANIA_02513 ANIA_02650 ANIA_02652 ANIA_02725 ANIA_02782 ANIA_03120 ANIA_03217 ANIA_03269 ANIA_03280 ANI…
1.0724e-07	163	1078	1.56179	Regulation of metabolic process	http://amigo.geneontology.org/amigo/term/GO:0019222	ANIA_00094 ANIA_00096 ANIA_00119 ANIA_00120 ANIA_00134 ANIA_00138 ANIA_00148 ANIA_00197 ANIA_00256 ANIA_00388 ANIA_00439 ANIA_00486 ANIA_00507 ANIA_00554 ANIA_00680 ANIA_00719 ANIA_00902 ANIA_00937 ANIA_01205 ANIA_01265 ANIA_01584 ANIA_01599 ANIA_01665 ANIA_01729 ANIA_01867 ANIA_02141 ANIA_02153 ANIA_02160 ANIA_02324 ANIA_02425 ANIA_02482 ANIA_02513 ANIA_02650 ANIA_02652 ANIA_02725 ANIA_02782 ANI…
1.0724e-07	158	1036	1.57598	Regulation of macromolecule metabolic process	http://amigo.geneontology.org/amigo/term/GO:0060255	ANIA_00094 ANIA_00096 ANIA_00119 ANIA_00134 ANIA_00138 ANIA_00148 ANIA_00197 ANIA_00388 ANIA_00486 ANIA_00507 ANIA_00554 ANIA_00680 ANIA_00719 ANIA_00902 ANIA_00937 ANIA_01205 ANIA_01265 ANIA_01584 ANIA_01599 ANIA_01665 ANIA_01729 ANIA_01867 ANIA_02141 ANIA_02153 ANIA_02160 ANIA_02324 ANIA_02425 ANIA_02482 ANIA_02513 ANIA_02650 ANIA_02652 ANIA_02725 ANIA_02782 ANIA_03095 ANIA_03120 ANIA_03217 ANI…
1.11821e-07	137	864	1.64045	Regulation of cellular biosynthetic process	http://amigo.geneontology.org/amigo/term/GO:0031326	ANIA_00094 ANIA_00096 ANIA_00134 ANIA_00138 ANIA_00148 ANIA_00197 ANIA_00256 ANIA_00388 ANIA_00486 ANIA_00507 ANIA_00554 ANIA_00680 ANIA_00719 ANIA_00902 ANIA_00937 ANIA_01205 ANIA_01265 ANIA_01584 ANIA_01599 ANIA_01665 ANIA_01729 ANIA_01867 ANIA_02141 ANIA_02160 ANIA_02324 ANIA_02425 ANIA_02482 ANIA_02513 ANIA_02650 ANIA_02652 ANIA_02725 ANIA_02782 ANIA_03120 ANIA_03217 ANIA_03269 ANIA_03280 ANI…
1.32435e-07	130	810	1.66184	RNA biosynthetic process	http://amigo.geneontology.org/amigo/term/GO:0032774	ANIA_00094 ANIA_00096 ANIA_00134 ANIA_00138 ANIA_00148 ANIA_00197 ANIA_00388 ANIA_00486 ANIA_00507 ANIA_00554 ANIA_00680 ANIA_00719 ANIA_00902 ANIA_00937 ANIA_01205 ANIA_01265 ANIA_01584 ANIA_01599 ANIA_01729 ANIA_01867 ANIA_02324 ANIA_02513 ANIA_02650 ANIA_02652 ANIA_02725 ANIA_02782 ANIA_03120 ANIA_03217 ANIA_03269 ANIA_03280 ANIA_03290 ANIA_03385 ANIA_03578 ANIA_03868 ANIA_03900 ANIA_03986 ANI…
1.39922e-07	129	803	1.66363	Transcription, DNA-templated	http://amigo.geneontology.org/amigo/term/GO:0006351	ANIA_00094 ANIA_00096 ANIA_00134 ANIA_00138 ANIA_00148 ANIA_00197 ANIA_00388 ANIA_00486 ANIA_00507 ANIA_00554 ANIA_00680 ANIA_00719 ANIA_00902 ANIA_00937 ANIA_01205 ANIA_01265 ANIA_01584 ANIA_01599 ANIA_01729 ANIA_01867 ANIA_02324 ANIA_02513 ANIA_02650 ANIA_02652 ANIA_02725 ANIA_02782 ANIA_03120 ANIA_03217 ANIA_03269 ANIA_03280 ANIA_03290 ANIA_03385 ANIA_03578 ANIA_03868 ANIA_03900 ANIA_03986 ANI…
1.60229e-07	129	805	1.65944	Nucleic acid-templated transcription	http://amigo.geneontology.org/amigo/term/GO:0097659	ANIA_00094 ANIA_00096 ANIA_00134 ANIA_00138 ANIA_00148 ANIA_00197 ANIA_00388 ANIA_00486 ANIA_00507 ANIA_00554 ANIA_00680 ANIA_00719 ANIA_00902 ANIA_00937 ANIA_01205 ANIA_01265 ANIA_01584 ANIA_01599 ANIA_01729 ANIA_01867 ANIA_02324 ANIA_02513 ANIA_02650 ANIA_02652 ANIA_02725 ANIA_02782 ANIA_03120 ANIA_03217 ANIA_03269 ANIA_03280 ANIA_03290 ANIA_03385 ANIA_03578 ANIA_03868 ANIA_03900 ANIA_03986 ANI…
4.46273e-07	151	1001	1.56103	Nucleobase-containing compound biosynthetic process	http://amigo.geneontology.org/amigo/term/GO:0034654	ANIA_00094 ANIA_00096 ANIA_00134 ANIA_00138 ANIA_00148 ANIA_00197 ANIA_00388 ANIA_00486 ANIA_00507 ANIA_00554 ANIA_00680 ANIA_00719 ANIA_00902 ANIA_00937 ANIA_01205 ANIA_01265 ANIA_01271 ANIA_01498 ANIA_01584 ANIA_01599 ANIA_01694 ANIA_01729 ANIA_01867 ANIA_02141 ANIA_02324 ANIA_02513 ANIA_02650 ANIA_02652 ANIA_02725 ANIA_02762 ANIA_02782 ANIA_03120 ANIA_03217 ANIA_03269 ANIA_03280 ANIA_03290 ANI…
2.09363e-06	193	1386	1.4368	Regulation of cellular process	http://amigo.geneontology.org/amigo/term/GO:0050794	ANIA_00038 ANIA_00094 ANIA_00096 ANIA_00120 ANIA_00134 ANIA_00138 ANIA_00148 ANIA_00197 ANIA_00256 ANIA_00388 ANIA_00439 ANIA_00486 ANIA_00507 ANIA_00554 ANIA_00556 ANIA_00680 ANIA_00699 ANIA_00719 ANIA_00902 ANIA_00937 ANIA_01025 ANIA_01205 ANIA_01265 ANIA_01401 ANIA_01584 ANIA_01599 ANIA_01661 ANIA_01665 ANIA_01729 ANIA_01800 ANIA_01867 ANIA_01967 ANIA_01980 ANIA_02141 ANIA_02160 ANIA_02324 ANI…
4.86642e-06	201	1473	1.40809	Regulation of biological process	http://amigo.geneontology.org/amigo/term/GO:0050789	ANIA_00038 ANIA_00094 ANIA_00096 ANIA_00119 ANIA_00120 ANIA_00134 ANIA_00138 ANIA_00148 ANIA_00197 ANIA_00256 ANIA_00388 ANIA_00439 ANIA_00486 ANIA_00507 ANIA_00554 ANIA_00556 ANIA_00680 ANIA_00699 ANIA_00719 ANIA_00902 ANIA_00937 ANIA_01025 ANIA_01205 ANIA_01265 ANIA_01401 ANIA_01584 ANIA_01599 ANIA_01661 ANIA_01665 ANIA_01729 ANIA_01800 ANIA_01867 ANIA_01967 ANIA_01980 ANIA_02141 ANIA_02153 ANI…
6.45227e-06	162	1136	1.47342	Heterocycle biosynthetic process	http://amigo.geneontology.org/amigo/term/GO:0018130	ANIA_00094 ANIA_00096 ANIA_00134 ANIA_00138 ANIA_00148 ANIA_00150 ANIA_00197 ANIA_00256 ANIA_00388 ANIA_00486 ANIA_00507 ANIA_00554 ANIA_00680 ANIA_00719 ANIA_00836 ANIA_00902 ANIA_00937 ANIA_00947 ANIA_01205 ANIA_01265 ANIA_01271 ANIA_01498 ANIA_01584 ANIA_01599 ANIA_01694 ANIA_01729 ANIA_01867 ANIA_01967 ANIA_02141 ANIA_02324 ANIA_02327 ANIA_02513 ANIA_02623 ANIA_02650 ANIA_02652 ANIA_02725 ANI…
1.20722e-05	159	1121	1.46572	Aromatic compound biosynthetic process	http://amigo.geneontology.org/amigo/term/GO:0019438	ANIA_00050 ANIA_00094 ANIA_00096 ANIA_00134 ANIA_00138 ANIA_00148 ANIA_00150 ANIA_00197 ANIA_00388 ANIA_00486 ANIA_00507 ANIA_00554 ANIA_00680 ANIA_00719 ANIA_00902 ANIA_00937 ANIA_01137 ANIA_01205 ANIA_01265 ANIA_01271 ANIA_01498 ANIA_01584 ANIA_01599 ANIA_01694 ANIA_01729 ANIA_01867 ANIA_01967 ANIA_02141 ANIA_02324 ANIA_02513 ANIA_02650 ANIA_02652 ANIA_02725 ANIA_02762 ANIA_02782 ANIA_03120 ANI…
0.000132716	21	72	3.06418	Carbon catabolite activation of transcription	http://amigo.geneontology.org/amigo/term/GO:0045991	ANIA_00388 ANIA_00554 ANIA_03217 ANIA_03269 ANIA_03280 ANIA_03986 ANIA_04001 ANIA_04750 ANIA_04821 ANIA_08164 ANIA_08355 ANIA_08506 ANIA_08732 ANIA_08885 ANIA_08978 ANIA_09292 ANIA_09458 ANIA_10423 ANIA_10504 ANIA_10638 ANIA_11093
0.000170624	165	1222	1.39396	Organic cyclic compound biosynthetic process	http://amigo.geneontology.org/amigo/term/GO:1901362	ANIA_00050 ANIA_00094 ANIA_00096 ANIA_00134 ANIA_00138 ANIA_00148 ANIA_00150 ANIA_00197 ANIA_00256 ANIA_00388 ANIA_00486 ANIA_00507 ANIA_00554 ANIA_00680 ANIA_00719 ANIA_00836 ANIA_00902 ANIA_00937 ANIA_00947 ANIA_01137 ANIA_01205 ANIA_01265 ANIA_01271 ANIA_01498 ANIA_01584 ANIA_01599 ANIA_01694 ANIA_01729 ANIA_01867 ANIA_01967 ANIA_02141 ANIA_02324 ANIA_02327 ANIA_02513 ANIA_02623 ANIA_02650 ANI…
0.000171099	32	140	2.36845	Cellular response to extracellular stimulus	http://amigo.geneontology.org/amigo/term/GO:0031668	ANIA_00388 ANIA_00439 ANIA_00554 ANIA_01733 ANIA_03217 ANIA_03269 ANIA_03280 ANIA_03986 ANIA_04001 ANIA_04166 ANIA_04750 ANIA_04821 ANIA_05708 ANIA_06846 ANIA_07388 ANIA_08164 ANIA_08168 ANIA_08355 ANIA_08369 ANIA_08506 ANIA_08540 ANIA_08732 ANIA_08885 ANIA_08978 ANIA_09292 ANIA_09458 ANIA_10171 ANIA_10423 ANIA_10504 ANIA_10564 ANIA_10638 ANIA_11093
0.000171099	32	140	2.36845	Cellular response to nutrient levels	http://amigo.geneontology.org/amigo/term/GO:0031669	ANIA_00388 ANIA_00439 ANIA_00554 ANIA_01733 ANIA_03217 ANIA_03269 ANIA_03280 ANIA_03986 ANIA_04001 ANIA_04166 ANIA_04750 ANIA_04821 ANIA_05708 ANIA_06846 ANIA_07388 ANIA_08164 ANIA_08168 ANIA_08355 ANIA_08369 ANIA_08506 ANIA_08540 ANIA_08732 ANIA_08885 ANIA_08978 ANIA_09292 ANIA_09458 ANIA_10171 ANIA_10423 ANIA_10504 ANIA_10564 ANIA_10638 ANIA_11093
0.000171099	32	140	2.36845	Cellular response to external stimulus	http://amigo.geneontology.org/amigo/term/GO:0071496	ANIA_00388 ANIA_00439 ANIA_00554 ANIA_01733 ANIA_03217 ANIA_03269 ANIA_03280 ANIA_03986 ANIA_04001 ANIA_04166 ANIA_04750 ANIA_04821 ANIA_05708 ANIA_06846 ANIA_07388 ANIA_08164 ANIA_08168 ANIA_08355 ANIA_08369 ANIA_08506 ANIA_08540 ANIA_08732 ANIA_08885 ANIA_08978 ANIA_09292 ANIA_09458 ANIA_10171 ANIA_10423 ANIA_10504 ANIA_10564 ANIA_10638 ANIA_11093
0.000209694	18	56	3.28305	Regulation of transcription from RNA polymerase II promoter by a nonfermentable carbon source	http://amigo.geneontology.org/amigo/term/GO:0061413	ANIA_00388 ANIA_03280 ANIA_03986 ANIA_04001 ANIA_04750 ANIA_04821 ANIA_08164 ANIA_08355 ANIA_08506 ANIA_08732 ANIA_08885 ANIA_08978 ANIA_09292 ANIA_09458 ANIA_10423 ANIA_10504 ANIA_10638 ANIA_11093
0.000209694	18	56	3.28305	Positive regulation of transcription from RNA polymerase II promoter by a nonfermentable carbon source	http://amigo.geneontology.org/amigo/term/GO:0061414	ANIA_00388 ANIA_03280 ANIA_03986 ANIA_04001 ANIA_04750 ANIA_04821 ANIA_08164 ANIA_08355 ANIA_08506 ANIA_08732 ANIA_08885 ANIA_08978 ANIA_09292 ANIA_09458 ANIA_10423 ANIA_10504 ANIA_10638 ANIA_11093
0.000228407	231	1846	1.29995	Nucleobase-containing compound metabolic process	http://amigo.geneontology.org/amigo/term/GO:0006139	ANIA_00038 ANIA_00094 ANIA_00096 ANIA_00114 ANIA_00119 ANIA_00126 ANIA_00134 ANIA_00138 ANIA_00148 ANIA_00197 ANIA_00237 ANIA_00388 ANIA_00486 ANIA_00507 ANIA_00554 ANIA_00556 ANIA_00582 ANIA_00680 ANIA_00719 ANIA_00902 ANIA_00937 ANIA_01071 ANIA_01205 ANIA_01265 ANIA_01271 ANIA_01401 ANIA_01435 ANIA_01479 ANIA_01498 ANIA_01580 ANIA_01584 ANIA_01599 ANIA_01660 ANIA_01694 ANIA_01729 ANIA_01843 ANI…
0.000294669	32	144	2.30173	Response to extracellular stimulus	http://amigo.geneontology.org/amigo/term/GO:0009991	ANIA_00388 ANIA_00439 ANIA_00554 ANIA_01733 ANIA_03217 ANIA_03269 ANIA_03280 ANIA_03986 ANIA_04001 ANIA_04166 ANIA_04750 ANIA_04821 ANIA_05708 ANIA_06846 ANIA_07388 ANIA_08164 ANIA_08168 ANIA_08355 ANIA_08369 ANIA_08506 ANIA_08540 ANIA_08732 ANIA_08885 ANIA_08978 ANIA_09292 ANIA_09458 ANIA_10171 ANIA_10423 ANIA_10504 ANIA_10564 ANIA_10638 ANIA_11093
0.000294669	32	144	2.30173	Response to nutrient levels	http://amigo.geneontology.org/amigo/term/GO:0031667	ANIA_00388 ANIA_00439 ANIA_00554 ANIA_01733 ANIA_03217 ANIA_03269 ANIA_03280 ANIA_03986 ANIA_04001 ANIA_04166 ANIA_04750 ANIA_04821 ANIA_05708 ANIA_06846 ANIA_07388 ANIA_08164 ANIA_08168 ANIA_08355 ANIA_08369 ANIA_08506 ANIA_08540 ANIA_08732 ANIA_08885 ANIA_08978 ANIA_09292 ANIA_09458 ANIA_10171 ANIA_10423 ANIA_10504 ANIA_10564 ANIA_10638 ANIA_11093
0.000302457	22	82	2.80883	Carbon catabolite regulation of transcription	http://amigo.geneontology.org/amigo/term/GO:0045990	ANIA_00388 ANIA_00554 ANIA_03217 ANIA_03269 ANIA_03280 ANIA_03986 ANIA_04001 ANIA_04166 ANIA_04750 ANIA_04821 ANIA_08164 ANIA_08355 ANIA_08506 ANIA_08732 ANIA_08885 ANIA_08978 ANIA_09292 ANIA_09458 ANIA_10423 ANIA_10504 ANIA_10638 ANIA_11093
0.000307133	6	7	8.75479	Primary alcohol catabolic process	http://amigo.geneontology.org/amigo/term/GO:0034310	ANIA_00554 ANIA_05226 ANIA_08978 ANIA_08979 ANIA_08980 ANIA_08981
0.000307133	6	7	8.75479	Ethanol catabolic process	http://amigo.geneontology.org/amigo/term/GO:0006068	ANIA_00554 ANIA_05226 ANIA_08978 ANIA_08979 ANIA_08980 ANIA_08981
0.000317576	20	71	2.96056	Carbon catabolite activation of transcription from RNA polymerase II promoter	http://amigo.geneontology.org/amigo/term/GO:0000436	ANIA_00388 ANIA_03217 ANIA_03269 ANIA_03280 ANIA_03986 ANIA_04001 ANIA_04750 ANIA_04821 ANIA_08164 ANIA_08355 ANIA_08506 ANIA_08732 ANIA_08885 ANIA_08978 ANIA_09292 ANIA_09458 ANIA_10423 ANIA_10504 ANIA_10638 ANIA_11093
0.000318748	201	1575	1.32366	Nucleic acid metabolic process	http://amigo.geneontology.org/amigo/term/GO:0090304	ANIA_00038 ANIA_00094 ANIA_00096 ANIA_00114 ANIA_00119 ANIA_00126 ANIA_00134 ANIA_00138 ANIA_00148 ANIA_00197 ANIA_00237 ANIA_00388 ANIA_00486 ANIA_00507 ANIA_00554 ANIA_00556 ANIA_00582 ANIA_00680 ANIA_00719 ANIA_00902 ANIA_00937 ANIA_01205 ANIA_01265 ANIA_01401 ANIA_01435 ANIA_01479 ANIA_01584 ANIA_01599 ANIA_01660 ANIA_01729 ANIA_01843 ANIA_01867 ANIA_02141 ANIA_02153 ANIA_02324 ANIA_02327 ANI…
0.00035951	32	146	2.26976	Response to external stimulus	http://amigo.geneontology.org/amigo/term/GO:0009605	ANIA_00388 ANIA_00439 ANIA_00554 ANIA_01733 ANIA_03217 ANIA_03269 ANIA_03280 ANIA_03986 ANIA_04001 ANIA_04166 ANIA_04750 ANIA_04821 ANIA_05708 ANIA_06846 ANIA_07388 ANIA_08164 ANIA_08168 ANIA_08355 ANIA_08369 ANIA_08506 ANIA_08540 ANIA_08732 ANIA_08885 ANIA_08978 ANIA_09292 ANIA_09458 ANIA_10171 ANIA_10423 ANIA_10504 ANIA_10564 ANIA_10638 ANIA_11093
0.000578834	49	276	1.86747	Double-stranded DNA binding	http://amigo.geneontology.org/amigo/term/GO:0003690	ANIA_00126 ANIA_00148 ANIA_00388 ANIA_00680 ANIA_01265 ANIA_01435 ANIA_01479 ANIA_01584 ANIA_01599 ANIA_01729 ANIA_01843 ANIA_02652 ANIA_03217 ANIA_03269 ANIA_03280 ANIA_03451 ANIA_03619 ANIA_03749 ANIA_03986 ANIA_04001 ANIA_04123 ANIA_04750 ANIA_04821 ANIA_05070 ANIA_05609 ANIA_05892 ANIA_05924 ANIA_06583 ANIA_06706 ANIA_06846 ANIA_08088 ANIA_08164 ANIA_08355 ANIA_08369 ANIA_08391 ANIA_08431 ANI…
0.000584166	25	104	2.50341	Cellular response to nutrient	http://amigo.geneontology.org/amigo/term/GO:0031670	ANIA_00388 ANIA_00554 ANIA_03217 ANIA_03269 ANIA_03280 ANIA_03986 ANIA_04001 ANIA_04166 ANIA_04750 ANIA_04821 ANIA_06846 ANIA_08164 ANIA_08168 ANIA_08355 ANIA_08369 ANIA_08506 ANIA_08732 ANIA_08885 ANIA_08978 ANIA_09292 ANIA_09458 ANIA_10423 ANIA_10504 ANIA_10638 ANIA_11093
0.000618431	212	1686	1.29739	Biological regulation	http://amigo.geneontology.org/amigo/term/GO:0065007	ANIA_00038 ANIA_00094 ANIA_00096 ANIA_00108 ANIA_00119 ANIA_00120 ANIA_00134 ANIA_00138 ANIA_00148 ANIA_00197 ANIA_00256 ANIA_00388 ANIA_00439 ANIA_00486 ANIA_00507 ANIA_00554 ANIA_00556 ANIA_00680 ANIA_00699 ANIA_00719 ANIA_00901 ANIA_00902 ANIA_00937 ANIA_01025 ANIA_01205 ANIA_01265 ANIA_01401 ANIA_01584 ANIA_01599 ANIA_01661 ANIA_01665 ANIA_01729 ANIA_01800 ANIA_01867 ANIA_01967 ANIA_01980 ANI…
0.000666578	243	1990	1.26696	Heterocycle metabolic process	http://amigo.geneontology.org/amigo/term/GO:0046483	ANIA_00038 ANIA_00094 ANIA_00096 ANIA_00114 ANIA_00119 ANIA_00126 ANIA_00134 ANIA_00138 ANIA_00148 ANIA_00150 ANIA_00197 ANIA_00237 ANIA_00256 ANIA_00388 ANIA_00486 ANIA_00507 ANIA_00554 ANIA_00556 ANIA_00582 ANIA_00680 ANIA_00719 ANIA_00836 ANIA_00902 ANIA_00937 ANIA_00947 ANIA_01071 ANIA_01205 ANIA_01265 ANIA_01271 ANIA_01401 ANIA_01435 ANIA_01479 ANIA_01498 ANIA_01580 ANIA_01584 ANIA_01599 ANI…
0.000666578	25	105	2.47911	Response to nutrient	http://amigo.geneontology.org/amigo/term/GO:0007584	ANIA_00388 ANIA_00554 ANIA_03217 ANIA_03269 ANIA_03280 ANIA_03986 ANIA_04001 ANIA_04166 ANIA_04750 ANIA_04821 ANIA_06846 ANIA_08164 ANIA_08168 ANIA_08355 ANIA_08369 ANIA_08506 ANIA_08732 ANIA_08885 ANIA_08978 ANIA_09292 ANIA_09458 ANIA_10423 ANIA_10504 ANIA_10638 ANIA_11093
0.00109921	175	1372	1.32796	Nucleic acid binding	http://amigo.geneontology.org/amigo/term/GO:0003676	ANIA_00094 ANIA_00096 ANIA_00119 ANIA_00126 ANIA_00138 ANIA_00148 ANIA_00197 ANIA_00388 ANIA_00486 ANIA_00507 ANIA_00578 ANIA_00582 ANIA_00680 ANIA_00719 ANIA_00902 ANIA_00937 ANIA_01265 ANIA_01401 ANIA_01432 ANIA_01435 ANIA_01479 ANIA_01584 ANIA_01599 ANIA_01729 ANIA_01773 ANIA_01843 ANIA_01956 ANIA_02141 ANIA_02324 ANIA_02482 ANIA_02498 ANIA_02637 ANIA_02650 ANIA_02652 ANIA_02725 ANIA_02782 ANI…
0.00132008	20	78	2.68787	Carbon catabolite regulation of transcription from RNA polymerase II promoter	http://amigo.geneontology.org/amigo/term/GO:0000429	ANIA_00388 ANIA_03217 ANIA_03269 ANIA_03280 ANIA_03986 ANIA_04001 ANIA_04750 ANIA_04821 ANIA_08164 ANIA_08355 ANIA_08506 ANIA_08732 ANIA_08885 ANIA_08978 ANIA_09292 ANIA_09458 ANIA_10423 ANIA_10504 ANIA_10638 ANIA_11093
0.00155271	43	238	1.87692	Cellular response to DNA damage stimulus	http://amigo.geneontology.org/amigo/term/GO:0006974	ANIA_00038 ANIA_00126 ANIA_00138 ANIA_00556 ANIA_00582 ANIA_01479 ANIA_01843 ANIA_01867 ANIA_02637 ANIA_02969 ANIA_03129 ANIA_03619 ANIA_03629 ANIA_03749 ANIA_03797 ANIA_04037 ANIA_04432 ANIA_04519 ANIA_04571 ANIA_05102 ANIA_05620 ANIA_06069 ANIA_06261 ANIA_06300 ANIA_06517 ANIA_06583 ANIA_06616 ANIA_06687 ANIA_06878 ANIA_07308 ANIA_07577 ANIA_07753 ANIA_08064 ANIA_08079 ANIA_08807 ANIA_10008 ANI…
0.00220804	5	6	8.5116	DNA clamp loader activity	http://amigo.geneontology.org/amigo/term/GO:0003689	ANIA_02160 ANIA_02969 ANIA_06300 ANIA_06517 ANIA_08064
0.00244682	172	1357	1.31202	Cellular macromolecule biosynthetic process	http://amigo.geneontology.org/amigo/term/GO:0034645	ANIA_00094 ANIA_00096 ANIA_00134 ANIA_00138 ANIA_00148 ANIA_00197 ANIA_00388 ANIA_00486 ANIA_00507 ANIA_00551 ANIA_00554 ANIA_00582 ANIA_00636 ANIA_00680 ANIA_00719 ANIA_00902 ANIA_00937 ANIA_01205 ANIA_01265 ANIA_01435 ANIA_01584 ANIA_01599 ANIA_01665 ANIA_01729 ANIA_01867 ANIA_02096 ANIA_02141 ANIA_02160 ANIA_02324 ANIA_02425 ANIA_02482 ANIA_02513 ANIA_02650 ANIA_02652 ANIA_02725 ANIA_02782 ANI…
0.00371749	7	13	5.4998	ADP binding	http://amigo.geneontology.org/amigo/term/GO:0043531	ANIA_01071 ANIA_01580 ANIA_03881 ANIA_08322 ANIA_08457 ANIA_08545 ANIA_09426
0.00392504	4	4	10.2139	Elg1 RFC-like complex	http://amigo.geneontology.org/amigo/term/GO:0031391	ANIA_02969 ANIA_06300 ANIA_06517 ANIA_08064
0.00414627	239	1997	1.23539	Nucleus	http://amigo.geneontology.org/amigo/term/GO:0005634	ANIA_00038 ANIA_00094 ANIA_00096 ANIA_00119 ANIA_00120 ANIA_00126 ANIA_00134 ANIA_00138 ANIA_00148 ANIA_00197 ANIA_00237 ANIA_00388 ANIA_00486 ANIA_00507 ANIA_00554 ANIA_00556 ANIA_00576 ANIA_00578 ANIA_00582 ANIA_00680 ANIA_00699 ANIA_00719 ANIA_00883 ANIA_00902 ANIA_00937 ANIA_00960 ANIA_01106 ANIA_01205 ANIA_01265 ANIA_01401 ANIA_01435 ANIA_01479 ANIA_01539 ANIA_01584 ANIA_01599 ANIA_01660 ANI…
0.00513506	29	148	2.05697	RNA polymerase II cis-regulatory region sequence-specific DNA binding	http://amigo.geneontology.org/amigo/term/GO:0000978	ANIA_00148 ANIA_00388 ANIA_01265 ANIA_01584 ANIA_03217 ANIA_03269 ANIA_03280 ANIA_03986 ANIA_04001 ANIA_04123 ANIA_04750 ANIA_04821 ANIA_05609 ANIA_05924 ANIA_06846 ANIA_08164 ANIA_08355 ANIA_08369 ANIA_08431 ANIA_08506 ANIA_08732 ANIA_08885 ANIA_08978 ANIA_09292 ANIA_09458 ANIA_10423 ANIA_10504 ANIA_10638 ANIA_11093
0.00520001	37	206	1.87087	DNA repair	http://amigo.geneontology.org/amigo/term/GO:0006281	ANIA_00038 ANIA_00126 ANIA_00138 ANIA_00556 ANIA_00582 ANIA_01479 ANIA_01843 ANIA_02637 ANIA_02969 ANIA_03129 ANIA_03619 ANIA_03629 ANIA_03749 ANIA_03797 ANIA_04037 ANIA_04432 ANIA_04519 ANIA_05102 ANIA_05620 ANIA_06069 ANIA_06261 ANIA_06300 ANIA_06517 ANIA_06583 ANIA_06616 ANIA_06687 ANIA_06878 ANIA_07308 ANIA_07577 ANIA_07753 ANIA_08064 ANIA_10240 ANIA_10415 ANIA_10443 ANIA_10635 ANIA_10755 ANI…
0.00524287	172	1378	1.29176	Macromolecule biosynthetic process	http://amigo.geneontology.org/amigo/term/GO:0009059	ANIA_00094 ANIA_00096 ANIA_00134 ANIA_00138 ANIA_00148 ANIA_00197 ANIA_00388 ANIA_00486 ANIA_00507 ANIA_00551 ANIA_00554 ANIA_00582 ANIA_00636 ANIA_00680 ANIA_00719 ANIA_00902 ANIA_00937 ANIA_01205 ANIA_01265 ANIA_01435 ANIA_01584 ANIA_01599 ANIA_01665 ANIA_01729 ANIA_01867 ANIA_02096 ANIA_02141 ANIA_02160 ANIA_02324 ANIA_02425 ANIA_02482 ANIA_02513 ANIA_02650 ANIA_02652 ANIA_02725 ANIA_02782 ANI…
0.00529863	115	857	1.38514	Cellular response to stimulus	http://amigo.geneontology.org/amigo/term/GO:0051716	ANIA_00038 ANIA_00120 ANIA_00126 ANIA_00138 ANIA_00256 ANIA_00388 ANIA_00439 ANIA_00551 ANIA_00554 ANIA_00556 ANIA_00582 ANIA_00836 ANIA_01025 ANIA_01479 ANIA_01661 ANIA_01665 ANIA_01733 ANIA_01800 ANIA_01843 ANIA_01867 ANIA_01967 ANIA_02204 ANIA_02363 ANIA_02412 ANIA_02637 ANIA_02962 ANIA_02969 ANIA_03065 ANIA_03095 ANIA_03129 ANIA_03217 ANIA_03269 ANIA_03280 ANIA_03619 ANIA_03629 ANIA_03749 ANI…
0.00553445	41	238	1.7973	Sequence-specific double-stranded DNA binding	http://amigo.geneontology.org/amigo/term/GO:1990837	ANIA_00148 ANIA_00388 ANIA_00680 ANIA_01265 ANIA_01435 ANIA_01584 ANIA_01599 ANIA_02652 ANIA_03217 ANIA_03269 ANIA_03280 ANIA_03986 ANIA_04001 ANIA_04123 ANIA_04750 ANIA_04821 ANIA_05070 ANIA_05609 ANIA_05892 ANIA_05924 ANIA_06706 ANIA_06846 ANIA_08088 ANIA_08164 ANIA_08355 ANIA_08369 ANIA_08391 ANIA_08431 ANIA_08506 ANIA_08732 ANIA_08885 ANIA_08978 ANIA_09292 ANIA_09399 ANIA_09458 ANIA_10423 ANI…
0.00565594	18	76	2.55348	Glycosyl compound metabolic process	http://amigo.geneontology.org/amigo/term/GO:1901657	ANIA_01071 ANIA_01498 ANIA_01580 ANIA_03013 ANIA_03340 ANIA_03881 ANIA_04382 ANIA_06711 ANIA_07108 ANIA_07363 ANIA_07624 ANIA_08323 ANIA_08457 ANIA_08524 ANIA_08545 ANIA_09426 ANIA_10180 ANIA_10230
0.00644716	161	1281	1.29893	Cation binding	http://amigo.geneontology.org/amigo/term/GO:0043169	ANIA_00042 ANIA_00051 ANIA_00094 ANIA_00096 ANIA_00148 ANIA_00197 ANIA_00224 ANIA_00388 ANIA_00486 ANIA_00507 ANIA_00551 ANIA_00556 ANIA_00680 ANIA_00901 ANIA_00902 ANIA_00937 ANIA_00947 ANIA_01025 ANIA_01301 ANIA_01584 ANIA_01599 ANIA_01729 ANIA_01868 ANIA_01956 ANIA_01967 ANIA_02195 ANIA_02322 ANIA_02324 ANIA_02327 ANIA_02334 ANIA_02650 ANIA_02725 ANIA_02782 ANIA_03120 ANIA_03217 ANIA_03269 ANI…
0.00698312	16	64	2.67906	Nucleoside metabolic process	http://amigo.geneontology.org/amigo/term/GO:0009116	ANIA_01071 ANIA_01498 ANIA_01580 ANIA_03340 ANIA_03881 ANIA_04382 ANIA_06711 ANIA_07108 ANIA_07363 ANIA_08323 ANIA_08457 ANIA_08524 ANIA_08545 ANIA_09426 ANIA_10180 ANIA_10230
0.00837203	159	1270	1.29403	Metal ion binding	http://amigo.geneontology.org/amigo/term/GO:0046872	ANIA_00042 ANIA_00051 ANIA_00094 ANIA_00096 ANIA_00148 ANIA_00197 ANIA_00224 ANIA_00388 ANIA_00486 ANIA_00507 ANIA_00551 ANIA_00556 ANIA_00680 ANIA_00901 ANIA_00902 ANIA_00937 ANIA_00947 ANIA_01025 ANIA_01301 ANIA_01584 ANIA_01599 ANIA_01729 ANIA_01868 ANIA_01956 ANIA_01967 ANIA_02195 ANIA_02322 ANIA_02324 ANIA_02327 ANIA_02334 ANIA_02650 ANIA_02725 ANIA_02782 ANIA_03120 ANIA_03217 ANIA_03269 ANI…
0.00846242	29	153	1.98794	Cis-regulatory region sequence-specific DNA binding	http://amigo.geneontology.org/amigo/term/GO:0000987	ANIA_00148 ANIA_00388 ANIA_01265 ANIA_01584 ANIA_03217 ANIA_03269 ANIA_03280 ANIA_03986 ANIA_04001 ANIA_04123 ANIA_04750 ANIA_04821 ANIA_05609 ANIA_05924 ANIA_06846 ANIA_08164 ANIA_08355 ANIA_08369 ANIA_08431 ANIA_08506 ANIA_08732 ANIA_08885 ANIA_08978 ANIA_09292 ANIA_09458 ANIA_10423 ANIA_10504 ANIA_10638 ANIA_11093
0.00866273	43	258	1.72913	Positive regulation of transcription by RNA polymerase II	http://amigo.geneontology.org/amigo/term/GO:0045944	ANIA_00148 ANIA_00388 ANIA_00486 ANIA_01584 ANIA_03217 ANIA_03269 ANIA_03280 ANIA_03290 ANIA_03986 ANIA_04001 ANIA_04013 ANIA_04123 ANIA_04720 ANIA_04750 ANIA_04821 ANIA_05102 ANIA_05431 ANIA_05609 ANIA_06569 ANIA_06687 ANIA_06846 ANIA_07592 ANIA_08103 ANIA_08164 ANIA_08345 ANIA_08355 ANIA_08357 ANIA_08431 ANIA_08506 ANIA_08529 ANIA_08732 ANIA_08774 ANIA_08885 ANIA_08978 ANIA_09292 ANIA_09458 ANI…
0.00893455	176	1431	1.27132	Cellular nitrogen compound biosynthetic process	http://amigo.geneontology.org/amigo/term/GO:0044271	ANIA_00094 ANIA_00096 ANIA_00134 ANIA_00138 ANIA_00148 ANIA_00197 ANIA_00256 ANIA_00388 ANIA_00486 ANIA_00507 ANIA_00554 ANIA_00680 ANIA_00719 ANIA_00902 ANIA_00937 ANIA_01205 ANIA_01265 ANIA_01271 ANIA_01498 ANIA_01584 ANIA_01599 ANIA_01665 ANIA_01694 ANIA_01729 ANIA_01867 ANIA_02141 ANIA_02237 ANIA_02324 ANIA_02333 ANIA_02464 ANIA_02482 ANIA_02513 ANIA_02514 ANIA_02623 ANIA_02650 ANIA_02652 ANI…
0.00893455	11	34	3.3045	Replication fork	http://amigo.geneontology.org/amigo/term/GO:0005657	ANIA_00582 ANIA_02969 ANIA_05102 ANIA_06300 ANIA_06517 ANIA_06687 ANIA_07308 ANIA_08064 ANIA_10470 ANIA_10635 ANIA_10755
0.00893455	37	214	1.80821	Transcription cis-regulatory region binding	http://amigo.geneontology.org/amigo/term/GO:0000976	ANIA_00148 ANIA_00388 ANIA_00680 ANIA_01265 ANIA_01584 ANIA_01599 ANIA_02652 ANIA_03217 ANIA_03269 ANIA_03280 ANIA_03986 ANIA_04001 ANIA_04123 ANIA_04750 ANIA_04821 ANIA_05070 ANIA_05609 ANIA_05924 ANIA_06846 ANIA_08088 ANIA_08164 ANIA_08355 ANIA_08369 ANIA_08391 ANIA_08431 ANIA_08506 ANIA_08732 ANIA_08885 ANIA_08978 ANIA_09292 ANIA_09399 ANIA_09458 ANIA_10423 ANIA_10501 ANIA_10504 ANIA_10638 ANI…
0.00893455	37	214	1.80821	Transcription regulatory region nucleic acid binding	http://amigo.geneontology.org/amigo/term/GO:0001067	ANIA_00148 ANIA_00388 ANIA_00680 ANIA_01265 ANIA_01584 ANIA_01599 ANIA_02652 ANIA_03217 ANIA_03269 ANIA_03280 ANIA_03986 ANIA_04001 ANIA_04123 ANIA_04750 ANIA_04821 ANIA_05070 ANIA_05609 ANIA_05924 ANIA_06846 ANIA_08088 ANIA_08164 ANIA_08355 ANIA_08369 ANIA_08391 ANIA_08431 ANIA_08506 ANIA_08732 ANIA_08885 ANIA_08978 ANIA_09292 ANIA_09399 ANIA_09458 ANIA_10423 ANIA_10501 ANIA_10504 ANIA_10638 ANI…
0.00893455	6	13	5.57123	Homologous recombination	http://www.genome.jp/kegg-bin/show_pathway?ani03440	ANIA_00556 ANIA_00582 ANIA_03619 ANIA_04555 ANIA_06878 ANIA_07308
0.00910662	7	16	4.7665	Ethanol metabolic process	http://amigo.geneontology.org/amigo/term/GO:0006067	ANIA_00554 ANIA_05226 ANIA_08396 ANIA_08978 ANIA_08979 ANIA_08980 ANIA_08981
0.0108878	64	430	1.53089	Cell communication	http://amigo.geneontology.org/amigo/term/GO:0007154	ANIA_00038 ANIA_00120 ANIA_00388 ANIA_00439 ANIA_00554 ANIA_00556 ANIA_01025 ANIA_01661 ANIA_01733 ANIA_01800 ANIA_01867 ANIA_02363 ANIA_02412 ANIA_02969 ANIA_03065 ANIA_03095 ANIA_03217 ANIA_03269 ANIA_03280 ANIA_03619 ANIA_03986 ANIA_04001 ANIA_04166 ANIA_04349 ANIA_04447 ANIA_04571 ANIA_04750 ANIA_04821 ANIA_04998 ANIA_05529 ANIA_05708 ANIA_05814 ANIA_06289 ANIA_06304 ANIA_06339 ANIA_06616 ANI…
0.0118848	18	79	2.38767	DNA-dependent DNA replication	http://amigo.geneontology.org/amigo/term/GO:0006261	ANIA_01435 ANIA_02969 ANIA_03129 ANIA_03619 ANIA_04432 ANIA_05102 ANIA_05892 ANIA_06069 ANIA_06261 ANIA_06300 ANIA_06517 ANIA_06687 ANIA_06878 ANIA_07308 ANIA_08064 ANIA_10470 ANIA_10635 ANIA_10755
0.0127139	5	8	6.3837	Threonine catabolic process	http://amigo.geneontology.org/amigo/term/GO:0006567	ANIA_00554 ANIA_05426 ANIA_07564 ANIA_08978 ANIA_08979
0.0127381	42	253	1.70232	Kinase activity	http://amigo.geneontology.org/amigo/term/GO:0016301	ANIA_00038 ANIA_00576 ANIA_00699 ANIA_01326 ANIA_01665 ANIA_01694 ANIA_01800 ANIA_01867 ANIA_02363 ANIA_02412 ANIA_02513 ANIA_03065 ANIA_03619 ANIA_04196 ANIA_04382 ANIA_04447 ANIA_04599 ANIA_05529 ANIA_05708 ANIA_05815 ANIA_05817 ANIA_05843 ANIA_06304 ANIA_06339 ANIA_06711 ANIA_06985 ANIA_07108 ANIA_07469 ANIA_07986 ANIA_07995 ANIA_08827 ANIA_08836 ANIA_08859 ANIA_08860 ANIA_10082 ANIA_10119 ANI…
0.0129148	44	271	1.67691	Small molecule catabolic process	http://amigo.geneontology.org/amigo/term/GO:0044282	ANIA_00388 ANIA_00423 ANIA_00554 ANIA_00593 ANIA_01137 ANIA_01271 ANIA_01498 ANIA_01541 ANIA_01733 ANIA_02248 ANIA_02350 ANIA_02762 ANIA_02951 ANIA_03591 ANIA_04035 ANIA_04114 ANIA_04687 ANIA_04792 ANIA_04829 ANIA_05060 ANIA_05226 ANIA_05426 ANIA_05626 ANIA_05669 ANIA_05986 ANIA_06762 ANIA_06767 ANIA_06796 ANIA_07068 ANIA_07564 ANIA_07995 ANIA_08396 ANIA_08782 ANIA_08978 ANIA_08979 ANIA_08980 ANI…
0.0129148	45	280	1.66531	Positive regulation of transcription, DNA-templated	http://amigo.geneontology.org/amigo/term/GO:0045893	ANIA_00148 ANIA_00388 ANIA_00486 ANIA_00554 ANIA_01584 ANIA_03217 ANIA_03269 ANIA_03280 ANIA_03290 ANIA_03986 ANIA_04001 ANIA_04013 ANIA_04123 ANIA_04720 ANIA_04750 ANIA_04821 ANIA_05102 ANIA_05431 ANIA_05609 ANIA_06569 ANIA_06687 ANIA_06846 ANIA_07592 ANIA_08092 ANIA_08103 ANIA_08164 ANIA_08345 ANIA_08355 ANIA_08357 ANIA_08431 ANIA_08506 ANIA_08529 ANIA_08732 ANIA_08774 ANIA_08885 ANIA_08978 ANI…
0.0130891	4	5	8.17114	DNA replication factor C complex	http://amigo.geneontology.org/amigo/term/GO:0005663	ANIA_02969 ANIA_06300 ANIA_06517 ANIA_08064
0.0130891	4	5	8.17114	Ctf18 RFC-like complex	http://amigo.geneontology.org/amigo/term/GO:0031390	ANIA_02160 ANIA_06300 ANIA_06517 ANIA_08064
0.0159306	56	372	1.55429	Transferase activity, transferring phosphorus-containing groups	http://amigo.geneontology.org/amigo/term/GO:0016772	ANIA_00038 ANIA_00576 ANIA_00699 ANIA_01326 ANIA_01498 ANIA_01665 ANIA_01694 ANIA_01800 ANIA_01867 ANIA_02327 ANIA_02363 ANIA_02412 ANIA_02513 ANIA_03065 ANIA_03380 ANIA_03499 ANIA_03619 ANIA_04196 ANIA_04303 ANIA_04382 ANIA_04447 ANIA_04599 ANIA_05529 ANIA_05620 ANIA_05708 ANIA_05815 ANIA_05817 ANIA_05843 ANIA_06140 ANIA_06252 ANIA_06304 ANIA_06339 ANIA_06711 ANIA_06985 ANIA_07108 ANIA_07308 ANI…
0.0169325	20	95	2.19654	DNA replication	http://amigo.geneontology.org/amigo/term/GO:0006260	ANIA_00582 ANIA_01435 ANIA_02160 ANIA_02969 ANIA_03129 ANIA_03619 ANIA_04432 ANIA_05102 ANIA_05892 ANIA_06069 ANIA_06261 ANIA_06300 ANIA_06517 ANIA_06687 ANIA_06878 ANIA_07308 ANIA_08064 ANIA_10470 ANIA_10635 ANIA_10755
0.0199691	163	1340	1.26031	RNA metabolic process	http://amigo.geneontology.org/amigo/term/GO:0016070	ANIA_00094 ANIA_00096 ANIA_00114 ANIA_00119 ANIA_00134 ANIA_00138 ANIA_00148 ANIA_00197 ANIA_00237 ANIA_00388 ANIA_00486 ANIA_00507 ANIA_00554 ANIA_00680 ANIA_00719 ANIA_00902 ANIA_00937 ANIA_01205 ANIA_01265 ANIA_01401 ANIA_01584 ANIA_01599 ANIA_01729 ANIA_01867 ANIA_02153 ANIA_02324 ANIA_02327 ANIA_02457 ANIA_02482 ANIA_02513 ANIA_02650 ANIA_02652 ANIA_02725 ANIA_02782 ANIA_03014 ANIA_03120 ANI…
0.0208429	45	287	1.62412	Positive regulation of RNA biosynthetic process	http://amigo.geneontology.org/amigo/term/GO:1902680	ANIA_00148 ANIA_00388 ANIA_00486 ANIA_00554 ANIA_01584 ANIA_03217 ANIA_03269 ANIA_03280 ANIA_03290 ANIA_03986 ANIA_04001 ANIA_04013 ANIA_04123 ANIA_04720 ANIA_04750 ANIA_04821 ANIA_05102 ANIA_05431 ANIA_05609 ANIA_06569 ANIA_06687 ANIA_06846 ANIA_07592 ANIA_08092 ANIA_08103 ANIA_08164 ANIA_08345 ANIA_08355 ANIA_08357 ANIA_08431 ANIA_08506 ANIA_08529 ANIA_08732 ANIA_08774 ANIA_08885 ANIA_08978 ANI…
0.0208429	45	287	1.62412	Positive regulation of nucleic acid-templated transcription	http://amigo.geneontology.org/amigo/term/GO:1903508	ANIA_00148 ANIA_00388 ANIA_00486 ANIA_00554 ANIA_01584 ANIA_03217 ANIA_03269 ANIA_03280 ANIA_03290 ANIA_03986 ANIA_04001 ANIA_04013 ANIA_04123 ANIA_04720 ANIA_04750 ANIA_04821 ANIA_05102 ANIA_05431 ANIA_05609 ANIA_06569 ANIA_06687 ANIA_06846 ANIA_07592 ANIA_08092 ANIA_08103 ANIA_08164 ANIA_08345 ANIA_08355 ANIA_08357 ANIA_08431 ANIA_08506 ANIA_08529 ANIA_08732 ANIA_08774 ANIA_08885 ANIA_08978 ANI…
0.0219092	8	23	3.71415	Primary alcohol metabolic process	http://amigo.geneontology.org/amigo/term/GO:0034308	ANIA_00554 ANIA_05226 ANIA_08396 ANIA_08978 ANIA_08979 ANIA_08980 ANIA_08981 ANIA_10762
0.0255848	26	139	1.91052	Protein kinase activity	http://amigo.geneontology.org/amigo/term/GO:0004672	ANIA_00038 ANIA_00576 ANIA_00699 ANIA_01326 ANIA_01665 ANIA_01800 ANIA_01867 ANIA_02363 ANIA_02412 ANIA_02513 ANIA_03065 ANIA_04196 ANIA_04447 ANIA_05529 ANIA_05708 ANIA_05815 ANIA_06339 ANIA_07986 ANIA_08827 ANIA_08836 ANIA_10082 ANIA_10119 ANIA_10731 ANIA_10819 ANIA_10895 ANIA_10937
0.0255848	35	208	1.72699	Phosphotransferase activity, alcohol group as acceptor	http://amigo.geneontology.org/amigo/term/GO:0016773	ANIA_00038 ANIA_00576 ANIA_00699 ANIA_01326 ANIA_01665 ANIA_01694 ANIA_01800 ANIA_01867 ANIA_02363 ANIA_02412 ANIA_02513 ANIA_03065 ANIA_03499 ANIA_04196 ANIA_04447 ANIA_04599 ANIA_05529 ANIA_05708 ANIA_05815 ANIA_06339 ANIA_06985 ANIA_07108 ANIA_07469 ANIA_07986 ANIA_07995 ANIA_08827 ANIA_08836 ANIA_10082 ANIA_10119 ANIA_10567 ANIA_10731 ANIA_10762 ANIA_10819 ANIA_10895 ANIA_10937
0.0257896	3	3	10.2139	Acetaldehyde catabolic process	http://amigo.geneontology.org/amigo/term/GO:0046187	ANIA_00554 ANIA_08978 ANIA_08979
0.0257896	3	3	10.2139	Acetaldehyde metabolic process	http://amigo.geneontology.org/amigo/term/GO:0006117	ANIA_00554 ANIA_08978 ANIA_08979
0.0257896	3	3	10.2139	Rad17 RFC-like complex	http://amigo.geneontology.org/amigo/term/GO:0031389	ANIA_06300 ANIA_06517 ANIA_08064
0.0257896	3	3	10.2139	NAD+ ADP-ribosyltransferase activity	http://amigo.geneontology.org/amigo/term/GO:0003950	ANIA_00482 ANIA_03129 ANIA_10567
0.0289874	29	167	1.8172	RNA polymerase II transcription regulatory region sequence-specific DNA binding	http://amigo.geneontology.org/amigo/term/GO:0000977	ANIA_00148 ANIA_00388 ANIA_01265 ANIA_01584 ANIA_03217 ANIA_03269 ANIA_03280 ANIA_03986 ANIA_04001 ANIA_04123 ANIA_04750 ANIA_04821 ANIA_05609 ANIA_05924 ANIA_06846 ANIA_08164 ANIA_08355 ANIA_08369 ANIA_08431 ANIA_08506 ANIA_08732 ANIA_08885 ANIA_08978 ANIA_09292 ANIA_09458 ANIA_10423 ANIA_10504 ANIA_10638 ANIA_11093
0.0315192	4	6	6.80928	Mitotic intra-S DNA damage checkpoint signaling	http://amigo.geneontology.org/amigo/term/GO:0031573	ANIA_00556 ANIA_03619 ANIA_06616 ANIA_06878
0.0371452	31	181	1.74935	Protein phosphorylation	http://amigo.geneontology.org/amigo/term/GO:0006468	ANIA_00038 ANIA_00138 ANIA_00576 ANIA_00699 ANIA_01326 ANIA_01665 ANIA_01800 ANIA_01867 ANIA_02363 ANIA_02412 ANIA_02513 ANIA_03065 ANIA_03095 ANIA_04196 ANIA_04447 ANIA_04571 ANIA_05529 ANIA_05708 ANIA_05815 ANIA_06339 ANIA_07986 ANIA_08079 ANIA_08827 ANIA_08836 ANIA_10082 ANIA_10119 ANIA_10731 ANIA_10741 ANIA_10819 ANIA_10895 ANIA_10937
0.0382226	7	20	3.76302	DNA strand elongation	http://amigo.geneontology.org/amigo/term/GO:0022616	ANIA_02969 ANIA_03129 ANIA_06069 ANIA_06517 ANIA_07308 ANIA_10470 ANIA_10755
0.0382226	7	20	3.76302	DNA strand elongation involved in DNA replication	http://amigo.geneontology.org/amigo/term/GO:0006271	ANIA_02969 ANIA_03129 ANIA_06069 ANIA_06517 ANIA_07308 ANIA_10470 ANIA_10755
0.0382226	7	20	3.76302	Kinesin complex	http://amigo.geneontology.org/amigo/term/GO:0005871	ANIA_01071 ANIA_01580 ANIA_03970 ANIA_08322 ANIA_08457 ANIA_09426 ANIA_10448
0.0382226	8	25	3.40464	Microtubule motor activity	http://amigo.geneontology.org/amigo/term/GO:0003777	ANIA_01071 ANIA_01580 ANIA_03970 ANIA_08322 ANIA_08457 ANIA_08862 ANIA_09426 ANIA_10448
0.0400031	16	74	2.23867	Double-strand break repair	http://amigo.geneontology.org/amigo/term/GO:0006302	ANIA_00556 ANIA_00582 ANIA_01843 ANIA_02637 ANIA_03129 ANIA_03619 ANIA_04432 ANIA_04519 ANIA_06261 ANIA_06583 ANIA_06616 ANIA_06878 ANIA_07753 ANIA_10240 ANIA_10415 ANIA_10755
0.0452984	46	305	1.54553	Phosphorylation	http://amigo.geneontology.org/amigo/term/GO:0016310	ANIA_00038 ANIA_00138 ANIA_00576 ANIA_00699 ANIA_01326 ANIA_01665 ANIA_01694 ANIA_01800 ANIA_01867 ANIA_02334 ANIA_02363 ANIA_02412 ANIA_02513 ANIA_03065 ANIA_03095 ANIA_04196 ANIA_04382 ANIA_04447 ANIA_04571 ANIA_04599 ANIA_05529 ANIA_05708 ANIA_05815 ANIA_05817 ANIA_05843 ANIA_06304 ANIA_06339 ANIA_06711 ANIA_06985 ANIA_07108 ANIA_07469 ANIA_07986 ANIA_07995 ANIA_08079 ANIA_08827 ANIA_08836 ANI…
0.0467944	65	471	1.42775	Cellular response to stress	http://amigo.geneontology.org/amigo/term/GO:0033554	ANIA_00038 ANIA_00126 ANIA_00138 ANIA_00439 ANIA_00551 ANIA_00554 ANIA_00556 ANIA_00582 ANIA_00836 ANIA_01479 ANIA_01665 ANIA_01733 ANIA_01800 ANIA_01843 ANIA_01867 ANIA_02204 ANIA_02412 ANIA_02637 ANIA_02969 ANIA_03065 ANIA_03129 ANIA_03619 ANIA_03629 ANIA_03749 ANIA_03797 ANIA_03838 ANIA_04037 ANIA_04432 ANIA_04519 ANIA_04571 ANIA_05102 ANIA_05529 ANIA_05620 ANIA_05708 ANIA_06069 ANIA_06261 ANI…
0.0467944	115	918	1.29219	Response to stimulus	http://amigo.geneontology.org/amigo/term/GO:0050896	ANIA_00038 ANIA_00120 ANIA_00126 ANIA_00138 ANIA_00256 ANIA_00388 ANIA_00439 ANIA_00551 ANIA_00554 ANIA_00556 ANIA_00582 ANIA_00836 ANIA_01025 ANIA_01479 ANIA_01661 ANIA_01665 ANIA_01733 ANIA_01800 ANIA_01843 ANIA_01867 ANIA_01967 ANIA_02204 ANIA_02363 ANIA_02412 ANIA_02637 ANIA_02962 ANIA_02969 ANIA_03065 ANIA_03095 ANIA_03129 ANIA_03217 ANIA_03269 ANIA_03280 ANIA_03619 ANIA_03629 ANIA_03749 ANI…
0.0467944	47	318	1.53372	Positive regulation of RNA metabolic process	http://amigo.geneontology.org/amigo/term/GO:0051254	ANIA_00148 ANIA_00388 ANIA_00486 ANIA_00554 ANIA_01584 ANIA_03217 ANIA_03269 ANIA_03280 ANIA_03290 ANIA_03986 ANIA_04001 ANIA_04013 ANIA_04123 ANIA_04720 ANIA_04750 ANIA_04821 ANIA_05102 ANIA_05431 ANIA_05609 ANIA_06569 ANIA_06687 ANIA_06846 ANIA_07592 ANIA_08092 ANIA_08103 ANIA_08164 ANIA_08345 ANIA_08355 ANIA_08357 ANIA_08431 ANIA_08506 ANIA_08529 ANIA_08732 ANIA_08774 ANIA_08885 ANIA_08978 ANI…
Sorbitol vs. Untreated	A. nidulans	THS30	downregulated genes	DEG
Enrichment FDR	nGenes	Pathway Genes	Fold Enrichment	Pathway	URL	Genes
3.18551e-15	740	1990	1.27542	Heterocycle metabolic process	http://amigo.geneontology.org/amigo/term/GO:0046483	ANIA_00038 ANIA_00070 ANIA_00076 ANIA_00083 ANIA_00094 ANIA_00096 ANIA_00097 ANIA_00106 ANIA_00114 ANIA_00119 ANIA_00121 ANIA_00124 ANIA_00126 ANIA_00128 ANIA_00130 ANIA_00134 ANIA_00138 ANIA_00148 ANIA_00150 ANIA_00154 ANIA_00161 ANIA_00189 ANIA_00191 ANIA_00192 ANIA_00197 ANIA_00202 ANIA_00237 ANIA_00256 ANIA_00258 ANIA_00260 ANIA_00270 ANIA_00321 ANIA_00327 ANIA_00388 ANIA_00410 ANIA_00421 ANI…
3.18551e-15	575	1473	1.33	Regulation of biological process	http://amigo.geneontology.org/amigo/term/GO:0050789	ANIA_00038 ANIA_00083 ANIA_00094 ANIA_00096 ANIA_00106 ANIA_00119 ANIA_00120 ANIA_00124 ANIA_00129 ANIA_00134 ANIA_00138 ANIA_00148 ANIA_00154 ANIA_00163 ANIA_00167 ANIA_00184 ANIA_00191 ANIA_00197 ANIA_00202 ANIA_00256 ANIA_00306 ANIA_00327 ANIA_00388 ANIA_00410 ANIA_00434 ANIA_00439 ANIA_00449 ANIA_00486 ANIA_00504 ANIA_00505 ANIA_00507 ANIA_00554 ANIA_00556 ANIA_00565 ANIA_00568 ANIA_00575 ANI…
3.18551e-15	547	1386	1.34466	Regulation of cellular process	http://amigo.geneontology.org/amigo/term/GO:0050794	ANIA_00038 ANIA_00083 ANIA_00094 ANIA_00096 ANIA_00106 ANIA_00120 ANIA_00124 ANIA_00134 ANIA_00138 ANIA_00148 ANIA_00154 ANIA_00163 ANIA_00167 ANIA_00184 ANIA_00191 ANIA_00197 ANIA_00202 ANIA_00256 ANIA_00306 ANIA_00327 ANIA_00388 ANIA_00410 ANIA_00439 ANIA_00449 ANIA_00486 ANIA_00504 ANIA_00505 ANIA_00507 ANIA_00554 ANIA_00556 ANIA_00565 ANIA_00568 ANIA_00575 ANIA_00641 ANIA_00671 ANIA_00673 ANI…
3.18551e-15	695	1846	1.29316	Nucleobase-containing compound metabolic process	http://amigo.geneontology.org/amigo/term/GO:0006139	ANIA_00038 ANIA_00070 ANIA_00076 ANIA_00083 ANIA_00094 ANIA_00096 ANIA_00097 ANIA_00114 ANIA_00119 ANIA_00124 ANIA_00126 ANIA_00128 ANIA_00130 ANIA_00134 ANIA_00138 ANIA_00148 ANIA_00154 ANIA_00161 ANIA_00189 ANIA_00191 ANIA_00192 ANIA_00197 ANIA_00202 ANIA_00237 ANIA_00258 ANIA_00260 ANIA_00321 ANIA_00327 ANIA_00388 ANIA_00410 ANIA_00421 ANIA_00424 ANIA_00434 ANIA_00437 ANIA_00475 ANIA_00486 ANI…
1.34404e-14	742	1997	1.26719	Nucleus	http://amigo.geneontology.org/amigo/term/GO:0005634	ANIA_00038 ANIA_00065 ANIA_00083 ANIA_00084 ANIA_00094 ANIA_00096 ANIA_00097 ANIA_00119 ANIA_00120 ANIA_00124 ANIA_00126 ANIA_00129 ANIA_00134 ANIA_00138 ANIA_00143 ANIA_00148 ANIA_00154 ANIA_00156 ANIA_00161 ANIA_00166 ANIA_00184 ANIA_00189 ANIA_00191 ANIA_00192 ANIA_00197 ANIA_00202 ANIA_00237 ANIA_00258 ANIA_00260 ANIA_00270 ANIA_00310 ANIA_00321 ANIA_00327 ANIA_00388 ANIA_00410 ANIA_00421 ANI…
1.80414e-14	641	1686	1.295	Biological regulation	http://amigo.geneontology.org/amigo/term/GO:0065007	ANIA_00038 ANIA_00083 ANIA_00084 ANIA_00094 ANIA_00096 ANIA_00106 ANIA_00108 ANIA_00119 ANIA_00120 ANIA_00124 ANIA_00129 ANIA_00134 ANIA_00138 ANIA_00148 ANIA_00154 ANIA_00163 ANIA_00167 ANIA_00184 ANIA_00191 ANIA_00197 ANIA_00202 ANIA_00241 ANIA_00256 ANIA_00261 ANIA_00306 ANIA_00327 ANIA_00388 ANIA_00410 ANIA_00434 ANIA_00439 ANIA_00449 ANIA_00486 ANIA_00504 ANIA_00505 ANIA_00507 ANIA_00554 ANI…
3.83869e-12	590	1575	1.28359	Nucleic acid metabolic process	http://amigo.geneontology.org/amigo/term/GO:0090304	ANIA_00038 ANIA_00076 ANIA_00083 ANIA_00094 ANIA_00096 ANIA_00097 ANIA_00114 ANIA_00119 ANIA_00124 ANIA_00126 ANIA_00128 ANIA_00130 ANIA_00134 ANIA_00138 ANIA_00148 ANIA_00154 ANIA_00161 ANIA_00189 ANIA_00191 ANIA_00192 ANIA_00197 ANIA_00202 ANIA_00237 ANIA_00258 ANIA_00260 ANIA_00321 ANIA_00327 ANIA_00388 ANIA_00410 ANIA_00421 ANIA_00424 ANIA_00434 ANIA_00437 ANIA_00475 ANIA_00486 ANIA_00502 ANI…
1.10316e-11	336	809	1.40569	Macromolecule modification	http://amigo.geneontology.org/amigo/term/GO:0043412	ANIA_00038 ANIA_00065 ANIA_00083 ANIA_00086 ANIA_00103 ANIA_00106 ANIA_00121 ANIA_00124 ANIA_00127 ANIA_00128 ANIA_00129 ANIA_00130 ANIA_00134 ANIA_00138 ANIA_00164 ANIA_00173 ANIA_00191 ANIA_00327 ANIA_00410 ANIA_00482 ANIA_00502 ANIA_00504 ANIA_00551 ANIA_00576 ANIA_00596 ANIA_00636 ANIA_00667 ANIA_00668 ANIA_00685 ANIA_00690 ANIA_00699 ANIA_00719 ANIA_00720 ANIA_00804 ANIA_00810 ANIA_00822 ANI…
1.10316e-11	164	335	1.65861	Intracellular protein-containing complex	http://amigo.geneontology.org/amigo/term/GO:0140535	ANIA_00083 ANIA_00138 ANIA_00154 ANIA_00191 ANIA_00192 ANIA_00260 ANIA_00321 ANIA_00327 ANIA_00504 ANIA_00596 ANIA_00668 ANIA_00719 ANIA_00810 ANIA_00816 ANIA_00883 ANIA_00905 ANIA_00911 ANIA_00978 ANIA_01038 ANIA_01167 ANIA_01208 ANIA_01248 ANIA_01272 ANIA_01283 ANIA_01328 ANIA_01344 ANIA_01360 ANIA_01369 ANIA_01485 ANIA_01494 ANIA_01545 ANIA_01668 ANIA_01669 ANIA_01757 ANIA_01779 ANIA_01976 ANI…
1.9635e-11	124	238	1.78464	Cellular response to DNA damage stimulus	http://amigo.geneontology.org/amigo/term/GO:0006974	ANIA_00038 ANIA_00076 ANIA_00097 ANIA_00126 ANIA_00138 ANIA_00327 ANIA_00410 ANIA_00437 ANIA_00504 ANIA_00556 ANIA_00582 ANIA_00596 ANIA_00872 ANIA_01023 ANIA_01237 ANIA_01272 ANIA_01479 ANIA_01485 ANIA_01668 ANIA_01708 ANIA_01843 ANIA_01867 ANIA_01976 ANIA_02087 ANIA_02139 ANIA_02214 ANIA_02246 ANIA_02304 ANIA_02446 ANIA_02491 ANIA_02637 ANIA_02764 ANIA_02969 ANIA_03040 ANIA_03067 ANIA_03118 ANI…
4.92316e-11	422	1078	1.33572	Regulation of metabolic process	http://amigo.geneontology.org/amigo/term/GO:0019222	ANIA_00083 ANIA_00094 ANIA_00096 ANIA_00106 ANIA_00119 ANIA_00120 ANIA_00134 ANIA_00138 ANIA_00148 ANIA_00154 ANIA_00167 ANIA_00191 ANIA_00197 ANIA_00202 ANIA_00256 ANIA_00327 ANIA_00388 ANIA_00410 ANIA_00434 ANIA_00439 ANIA_00486 ANIA_00504 ANIA_00505 ANIA_00507 ANIA_00554 ANIA_00565 ANIA_00568 ANIA_00632 ANIA_00646 ANIA_00671 ANIA_00680 ANIA_00719 ANIA_00720 ANIA_00767 ANIA_00807 ANIA_00816 ANI…
5.65692e-11	394	996	1.34986	Regulation of cellular metabolic process	http://amigo.geneontology.org/amigo/term/GO:0031323	ANIA_00083 ANIA_00094 ANIA_00096 ANIA_00106 ANIA_00120 ANIA_00134 ANIA_00138 ANIA_00148 ANIA_00154 ANIA_00167 ANIA_00191 ANIA_00197 ANIA_00202 ANIA_00256 ANIA_00327 ANIA_00388 ANIA_00410 ANIA_00439 ANIA_00486 ANIA_00504 ANIA_00505 ANIA_00507 ANIA_00554 ANIA_00565 ANIA_00568 ANIA_00671 ANIA_00680 ANIA_00719 ANIA_00720 ANIA_00807 ANIA_00816 ANIA_00891 ANIA_00902 ANIA_00906 ANIA_00910 ANIA_00911 ANI…
6.36087e-11	382	962	1.35564	Regulation of nitrogen compound metabolic process	http://amigo.geneontology.org/amigo/term/GO:0051171	ANIA_00083 ANIA_00094 ANIA_00096 ANIA_00106 ANIA_00134 ANIA_00138 ANIA_00148 ANIA_00154 ANIA_00167 ANIA_00191 ANIA_00197 ANIA_00202 ANIA_00256 ANIA_00327 ANIA_00388 ANIA_00410 ANIA_00486 ANIA_00504 ANIA_00505 ANIA_00507 ANIA_00554 ANIA_00565 ANIA_00568 ANIA_00671 ANIA_00680 ANIA_00719 ANIA_00720 ANIA_00807 ANIA_00816 ANIA_00891 ANIA_00902 ANIA_00906 ANIA_00910 ANIA_00911 ANIA_00937 ANIA_01028 ANI…
7.54839e-11	298	713	1.41552	Protein modification process	http://amigo.geneontology.org/amigo/term/GO:0036211	ANIA_00038 ANIA_00065 ANIA_00083 ANIA_00086 ANIA_00103 ANIA_00106 ANIA_00121 ANIA_00124 ANIA_00127 ANIA_00129 ANIA_00134 ANIA_00138 ANIA_00164 ANIA_00173 ANIA_00191 ANIA_00327 ANIA_00410 ANIA_00482 ANIA_00504 ANIA_00551 ANIA_00576 ANIA_00596 ANIA_00636 ANIA_00667 ANIA_00668 ANIA_00690 ANIA_00699 ANIA_00719 ANIA_00720 ANIA_00810 ANIA_00822 ANIA_00883 ANIA_00905 ANIA_00906 ANIA_00911 ANIA_01171 ANI…
7.54839e-11	298	713	1.41552	Cellular protein modification process	http://amigo.geneontology.org/amigo/term/GO:0006464	ANIA_00038 ANIA_00065 ANIA_00083 ANIA_00086 ANIA_00103 ANIA_00106 ANIA_00121 ANIA_00124 ANIA_00127 ANIA_00129 ANIA_00134 ANIA_00138 ANIA_00164 ANIA_00173 ANIA_00191 ANIA_00327 ANIA_00410 ANIA_00482 ANIA_00504 ANIA_00551 ANIA_00576 ANIA_00596 ANIA_00636 ANIA_00667 ANIA_00668 ANIA_00690 ANIA_00699 ANIA_00719 ANIA_00720 ANIA_00810 ANIA_00822 ANIA_00883 ANIA_00905 ANIA_00906 ANIA_00911 ANIA_01171 ANI…
7.54839e-11	295	710	1.41929	Purine nucleotide binding	http://amigo.geneontology.org/amigo/term/GO:0017076	ANIA_00034 ANIA_00038 ANIA_00097 ANIA_00106 ANIA_00114 ANIA_00124 ANIA_00126 ANIA_00161 ANIA_00327 ANIA_00347 ANIA_00349 ANIA_00381 ANIA_00424 ANIA_00449 ANIA_00490 ANIA_00561 ANIA_00565 ANIA_00576 ANIA_00637 ANIA_00646 ANIA_00673 ANIA_00676 ANIA_00699 ANIA_00705 ANIA_00797 ANIA_00804 ANIA_00822 ANIA_00847 ANIA_00866 ANIA_00893 ANIA_00948 ANIA_00953 ANIA_01062 ANIA_01071 ANIA_01085 ANIA_01171 ANI…
7.54839e-11	294	707	1.42056	Purine ribonucleotide binding	http://amigo.geneontology.org/amigo/term/GO:0032555	ANIA_00034 ANIA_00038 ANIA_00097 ANIA_00106 ANIA_00114 ANIA_00124 ANIA_00126 ANIA_00161 ANIA_00327 ANIA_00347 ANIA_00349 ANIA_00381 ANIA_00424 ANIA_00449 ANIA_00490 ANIA_00561 ANIA_00565 ANIA_00576 ANIA_00637 ANIA_00646 ANIA_00673 ANIA_00676 ANIA_00699 ANIA_00705 ANIA_00797 ANIA_00804 ANIA_00822 ANIA_00847 ANIA_00866 ANIA_00893 ANIA_00948 ANIA_00953 ANIA_01062 ANIA_01071 ANIA_01085 ANIA_01171 ANI…
1.05821e-10	536	1431	1.27752	Cellular nitrogen compound biosynthetic process	http://amigo.geneontology.org/amigo/term/GO:0044271	ANIA_00083 ANIA_00094 ANIA_00096 ANIA_00097 ANIA_00106 ANIA_00121 ANIA_00134 ANIA_00138 ANIA_00148 ANIA_00154 ANIA_00167 ANIA_00191 ANIA_00192 ANIA_00197 ANIA_00202 ANIA_00256 ANIA_00260 ANIA_00270 ANIA_00278 ANIA_00321 ANIA_00327 ANIA_00388 ANIA_00410 ANIA_00434 ANIA_00486 ANIA_00490 ANIA_00495 ANIA_00505 ANIA_00507 ANIA_00554 ANIA_00565 ANIA_00568 ANIA_00591 ANIA_00641 ANIA_00648 ANIA_00662 ANI…
1.53697e-10	490	1286	1.29226	Protein metabolic process	http://amigo.geneontology.org/amigo/term/GO:0019538	ANIA_00038 ANIA_00065 ANIA_00083 ANIA_00084 ANIA_00086 ANIA_00103 ANIA_00106 ANIA_00121 ANIA_00124 ANIA_00127 ANIA_00129 ANIA_00134 ANIA_00138 ANIA_00164 ANIA_00167 ANIA_00173 ANIA_00191 ANIA_00224 ANIA_00256 ANIA_00278 ANIA_00327 ANIA_00349 ANIA_00410 ANIA_00482 ANIA_00504 ANIA_00505 ANIA_00551 ANIA_00576 ANIA_00596 ANIA_00636 ANIA_00641 ANIA_00667 ANIA_00668 ANIA_00690 ANIA_00699 ANIA_00705 ANI…
1.79689e-10	404	1036	1.3313	Regulation of macromolecule metabolic process	http://amigo.geneontology.org/amigo/term/GO:0060255	ANIA_00083 ANIA_00094 ANIA_00096 ANIA_00119 ANIA_00134 ANIA_00138 ANIA_00148 ANIA_00154 ANIA_00167 ANIA_00191 ANIA_00197 ANIA_00202 ANIA_00327 ANIA_00388 ANIA_00410 ANIA_00434 ANIA_00486 ANIA_00505 ANIA_00507 ANIA_00554 ANIA_00568 ANIA_00632 ANIA_00646 ANIA_00671 ANIA_00680 ANIA_00719 ANIA_00720 ANIA_00767 ANIA_00807 ANIA_00816 ANIA_00891 ANIA_00902 ANIA_00906 ANIA_00910 ANIA_00911 ANIA_00937 ANI…
1.80524e-10	442	1141	1.31151	Cellular protein metabolic process	http://amigo.geneontology.org/amigo/term/GO:0044267	ANIA_00038 ANIA_00065 ANIA_00083 ANIA_00084 ANIA_00086 ANIA_00103 ANIA_00106 ANIA_00121 ANIA_00124 ANIA_00127 ANIA_00129 ANIA_00134 ANIA_00138 ANIA_00164 ANIA_00167 ANIA_00173 ANIA_00191 ANIA_00278 ANIA_00327 ANIA_00410 ANIA_00482 ANIA_00504 ANIA_00505 ANIA_00551 ANIA_00576 ANIA_00596 ANIA_00636 ANIA_00641 ANIA_00667 ANIA_00668 ANIA_00690 ANIA_00699 ANIA_00705 ANIA_00719 ANIA_00720 ANIA_00810 ANI…
1.86434e-10	108	206	1.8006	DNA repair	http://amigo.geneontology.org/amigo/term/GO:0006281	ANIA_00038 ANIA_00076 ANIA_00097 ANIA_00126 ANIA_00138 ANIA_00327 ANIA_00437 ANIA_00504 ANIA_00556 ANIA_00582 ANIA_00596 ANIA_00872 ANIA_01237 ANIA_01479 ANIA_01668 ANIA_01708 ANIA_01843 ANIA_01976 ANIA_02087 ANIA_02139 ANIA_02214 ANIA_02304 ANIA_02446 ANIA_02491 ANIA_02637 ANIA_02764 ANIA_02969 ANIA_03040 ANIA_03067 ANIA_03118 ANIA_03129 ANIA_03144 ANIA_03186 ANIA_03373 ANIA_03450 ANIA_03619 ANI…
1.86434e-10	405	1048	1.32939	Protein binding	http://amigo.geneontology.org/amigo/term/GO:0005515	ANIA_00038 ANIA_00065 ANIA_00083 ANIA_00095 ANIA_00108 ANIA_00120 ANIA_00127 ANIA_00128 ANIA_00184 ANIA_00191 ANIA_00203 ANIA_00219 ANIA_00244 ANIA_00249 ANIA_00306 ANIA_00307 ANIA_00310 ANIA_00317 ANIA_00349 ANIA_00381 ANIA_00396 ANIA_00414 ANIA_00481 ANIA_00490 ANIA_00539 ANIA_00576 ANIA_00596 ANIA_00641 ANIA_00668 ANIA_00673 ANIA_00690 ANIA_00719 ANIA_00782 ANIA_00810 ANIA_00813 ANIA_00883 ANI…
2.00377e-10	381	969	1.34219	Regulation of primary metabolic process	http://amigo.geneontology.org/amigo/term/GO:0080090	ANIA_00083 ANIA_00094 ANIA_00096 ANIA_00134 ANIA_00138 ANIA_00148 ANIA_00154 ANIA_00167 ANIA_00191 ANIA_00197 ANIA_00202 ANIA_00327 ANIA_00388 ANIA_00410 ANIA_00486 ANIA_00504 ANIA_00505 ANIA_00507 ANIA_00554 ANIA_00565 ANIA_00568 ANIA_00671 ANIA_00680 ANIA_00719 ANIA_00720 ANIA_00807 ANIA_00816 ANIA_00891 ANIA_00902 ANIA_00906 ANIA_00910 ANIA_00911 ANIA_00937 ANIA_01028 ANIA_01052 ANIA_01132 ANI…
2.03596e-10	509	1357	1.28117	Cellular macromolecule biosynthetic process	http://amigo.geneontology.org/amigo/term/GO:0034645	ANIA_00083 ANIA_00086 ANIA_00094 ANIA_00096 ANIA_00097 ANIA_00127 ANIA_00129 ANIA_00134 ANIA_00138 ANIA_00148 ANIA_00154 ANIA_00167 ANIA_00191 ANIA_00192 ANIA_00197 ANIA_00202 ANIA_00260 ANIA_00278 ANIA_00321 ANIA_00327 ANIA_00388 ANIA_00410 ANIA_00434 ANIA_00486 ANIA_00505 ANIA_00507 ANIA_00551 ANIA_00554 ANIA_00558 ANIA_00568 ANIA_00582 ANIA_00636 ANIA_00641 ANIA_00667 ANIA_00671 ANIA_00680 ANI…
5.72834e-10	60	95	2.17277	DNA replication	http://amigo.geneontology.org/amigo/term/GO:0006260	ANIA_00097 ANIA_00129 ANIA_00260 ANIA_00410 ANIA_00582 ANIA_00872 ANIA_01207 ANIA_01237 ANIA_01259 ANIA_01435 ANIA_01779 ANIA_01976 ANIA_02087 ANIA_02160 ANIA_02446 ANIA_02491 ANIA_02764 ANIA_02969 ANIA_03033 ANIA_03040 ANIA_03067 ANIA_03118 ANIA_03129 ANIA_03450 ANIA_03619 ANIA_03940 ANIA_04380 ANIA_04432 ANIA_04752 ANIA_04771 ANIA_04789 ANIA_05092 ANIA_05102 ANIA_05494 ANIA_05617 ANIA_05892 ANI…
7.09571e-10	301	742	1.38674	Ribonucleotide binding	http://amigo.geneontology.org/amigo/term/GO:0032553	ANIA_00034 ANIA_00038 ANIA_00097 ANIA_00106 ANIA_00114 ANIA_00124 ANIA_00126 ANIA_00161 ANIA_00327 ANIA_00330 ANIA_00347 ANIA_00349 ANIA_00381 ANIA_00424 ANIA_00449 ANIA_00490 ANIA_00502 ANIA_00561 ANIA_00565 ANIA_00576 ANIA_00637 ANIA_00646 ANIA_00673 ANIA_00676 ANIA_00699 ANIA_00705 ANIA_00797 ANIA_00804 ANIA_00822 ANIA_00847 ANIA_00866 ANIA_00876 ANIA_00893 ANIA_00948 ANIA_00953 ANIA_01062 ANI…
8.94843e-10	313	779	1.37434	Carbohydrate derivative binding	http://amigo.geneontology.org/amigo/term/GO:0097367	ANIA_00034 ANIA_00038 ANIA_00097 ANIA_00106 ANIA_00114 ANIA_00124 ANIA_00126 ANIA_00161 ANIA_00221 ANIA_00299 ANIA_00321 ANIA_00327 ANIA_00330 ANIA_00347 ANIA_00349 ANIA_00381 ANIA_00424 ANIA_00449 ANIA_00490 ANIA_00502 ANIA_00561 ANIA_00565 ANIA_00576 ANIA_00637 ANIA_00646 ANIA_00673 ANIA_00676 ANIA_00699 ANIA_00705 ANIA_00797 ANIA_00804 ANIA_00822 ANIA_00847 ANIA_00866 ANIA_00876 ANIA_00893 ANI…
9.725e-10	512	1378	1.26881	Macromolecule biosynthetic process	http://amigo.geneontology.org/amigo/term/GO:0009059	ANIA_00083 ANIA_00086 ANIA_00094 ANIA_00096 ANIA_00097 ANIA_00127 ANIA_00129 ANIA_00134 ANIA_00138 ANIA_00148 ANIA_00154 ANIA_00167 ANIA_00191 ANIA_00192 ANIA_00197 ANIA_00202 ANIA_00260 ANIA_00278 ANIA_00321 ANIA_00327 ANIA_00388 ANIA_00410 ANIA_00434 ANIA_00486 ANIA_00505 ANIA_00507 ANIA_00551 ANIA_00554 ANIA_00558 ANIA_00568 ANIA_00582 ANIA_00636 ANIA_00641 ANIA_00667 ANIA_00671 ANIA_00680 ANI…
1.00981e-09	52	79	2.27436	DNA-dependent DNA replication	http://amigo.geneontology.org/amigo/term/GO:0006261	ANIA_00129 ANIA_00260 ANIA_00410 ANIA_00872 ANIA_01207 ANIA_01237 ANIA_01259 ANIA_01435 ANIA_01779 ANIA_01976 ANIA_02087 ANIA_02446 ANIA_02491 ANIA_02969 ANIA_03033 ANIA_03040 ANIA_03067 ANIA_03118 ANIA_03129 ANIA_03450 ANIA_03619 ANIA_03940 ANIA_04432 ANIA_04752 ANIA_04771 ANIA_05092 ANIA_05102 ANIA_05494 ANIA_05617 ANIA_05892 ANIA_05901 ANIA_05992 ANIA_06069 ANIA_06261 ANIA_06300 ANIA_06517 ANI…
2.64521e-09	248	595	1.42285	Adenyl ribonucleotide binding	http://amigo.geneontology.org/amigo/term/GO:0032559	ANIA_00034 ANIA_00038 ANIA_00097 ANIA_00106 ANIA_00114 ANIA_00124 ANIA_00126 ANIA_00161 ANIA_00327 ANIA_00349 ANIA_00381 ANIA_00424 ANIA_00490 ANIA_00561 ANIA_00565 ANIA_00576 ANIA_00637 ANIA_00646 ANIA_00673 ANIA_00699 ANIA_00705 ANIA_00797 ANIA_00822 ANIA_00847 ANIA_00866 ANIA_00948 ANIA_01062 ANIA_01071 ANIA_01171 ANIA_01201 ANIA_01207 ANIA_01237 ANIA_01296 ANIA_01326 ANIA_01380 ANIA_01479 ANI…
3.89789e-09	248	597	1.41802	Adenyl nucleotide binding	http://amigo.geneontology.org/amigo/term/GO:0030554	ANIA_00034 ANIA_00038 ANIA_00097 ANIA_00106 ANIA_00114 ANIA_00124 ANIA_00126 ANIA_00161 ANIA_00327 ANIA_00349 ANIA_00381 ANIA_00424 ANIA_00490 ANIA_00561 ANIA_00565 ANIA_00576 ANIA_00637 ANIA_00646 ANIA_00673 ANIA_00699 ANIA_00705 ANIA_00797 ANIA_00822 ANIA_00847 ANIA_00866 ANIA_00948 ANIA_01062 ANIA_01071 ANIA_01171 ANIA_01201 ANIA_01207 ANIA_01237 ANIA_01296 ANIA_01326 ANIA_01380 ANIA_01479 ANI…
4.15419e-09	143	307	1.59998	DNA metabolic process	http://amigo.geneontology.org/amigo/term/GO:0006259	ANIA_00038 ANIA_00076 ANIA_00097 ANIA_00126 ANIA_00138 ANIA_00260 ANIA_00327 ANIA_00410 ANIA_00424 ANIA_00437 ANIA_00504 ANIA_00556 ANIA_00582 ANIA_00596 ANIA_00872 ANIA_01191 ANIA_01207 ANIA_01237 ANIA_01259 ANIA_01435 ANIA_01479 ANIA_01660 ANIA_01668 ANIA_01708 ANIA_01843 ANIA_01906 ANIA_01976 ANIA_02087 ANIA_02139 ANIA_02141 ANIA_02214 ANIA_02271 ANIA_02302 ANIA_02304 ANIA_02417 ANIA_02446 ANI…
4.17557e-09	280	691	1.3847	Purine ribonucleoside triphosphate binding	http://amigo.geneontology.org/amigo/term/GO:0035639	ANIA_00034 ANIA_00038 ANIA_00097 ANIA_00106 ANIA_00114 ANIA_00124 ANIA_00126 ANIA_00161 ANIA_00327 ANIA_00347 ANIA_00349 ANIA_00381 ANIA_00424 ANIA_00449 ANIA_00490 ANIA_00561 ANIA_00565 ANIA_00576 ANIA_00637 ANIA_00646 ANIA_00673 ANIA_00676 ANIA_00699 ANIA_00705 ANIA_00797 ANIA_00804 ANIA_00822 ANIA_00847 ANIA_00866 ANIA_00893 ANIA_00948 ANIA_00953 ANIA_01085 ANIA_01171 ANIA_01182 ANIA_01201 ANI…
5.26897e-09	588	1620	1.23304	Protein-containing complex	http://amigo.geneontology.org/amigo/term/GO:0032991	ANIA_00065 ANIA_00068 ANIA_00083 ANIA_00084 ANIA_00097 ANIA_00119 ANIA_00124 ANIA_00126 ANIA_00138 ANIA_00143 ANIA_00154 ANIA_00161 ANIA_00165 ANIA_00166 ANIA_00167 ANIA_00189 ANIA_00191 ANIA_00192 ANIA_00244 ANIA_00256 ANIA_00260 ANIA_00261 ANIA_00278 ANIA_00306 ANIA_00321 ANIA_00327 ANIA_00381 ANIA_00405 ANIA_00410 ANIA_00421 ANIA_00434 ANIA_00439 ANIA_00462 ANIA_00475 ANIA_00504 ANIA_00556 ANI…
6.4737e-09	220	523	1.44428	Zinc ion binding	http://amigo.geneontology.org/amigo/term/GO:0008270	ANIA_00094 ANIA_00096 ANIA_00148 ANIA_00158 ANIA_00197 ANIA_00202 ANIA_00241 ANIA_00261 ANIA_00388 ANIA_00443 ANIA_00486 ANIA_00507 ANIA_00568 ANIA_00646 ANIA_00667 ANIA_00680 ANIA_00774 ANIA_00797 ANIA_00891 ANIA_00902 ANIA_00918 ANIA_00937 ANIA_01028 ANIA_01303 ANIA_01403 ANIA_01406 ANIA_01584 ANIA_01599 ANIA_01638 ANIA_01705 ANIA_01706 ANIA_01729 ANIA_01779 ANIA_01944 ANIA_02001 ANIA_02002 ANI…
8.92867e-09	175	392	1.51119	Cell cycle	http://amigo.geneontology.org/amigo/term/GO:0007049	ANIA_00038 ANIA_00084 ANIA_00129 ANIA_00143 ANIA_00166 ANIA_00410 ANIA_00414 ANIA_00504 ANIA_00556 ANIA_00673 ANIA_00676 ANIA_00699 ANIA_00807 ANIA_00848 ANIA_00872 ANIA_00905 ANIA_00911 ANIA_00960 ANIA_01005 ANIA_01056 ANIA_01171 ANIA_01182 ANIA_01191 ANIA_01207 ANIA_01223 ANIA_01237 ANIA_01286 ANIA_01359 ANIA_01394 ANIA_01398 ANIA_01399 ANIA_01435 ANIA_01485 ANIA_01545 ANIA_01660 ANIA_01661 ANI…
1.09381e-08	355	919	1.31961	Regulation of gene expression	http://amigo.geneontology.org/amigo/term/GO:0010468	ANIA_00083 ANIA_00094 ANIA_00096 ANIA_00119 ANIA_00134 ANIA_00138 ANIA_00148 ANIA_00154 ANIA_00167 ANIA_00191 ANIA_00197 ANIA_00202 ANIA_00327 ANIA_00388 ANIA_00410 ANIA_00434 ANIA_00486 ANIA_00505 ANIA_00507 ANIA_00554 ANIA_00568 ANIA_00632 ANIA_00646 ANIA_00671 ANIA_00680 ANIA_00719 ANIA_00720 ANIA_00767 ANIA_00807 ANIA_00891 ANIA_00902 ANIA_00910 ANIA_00937 ANIA_01028 ANIA_01052 ANIA_01132 ANI…
2.04312e-08	89	168	1.78413	Regulation of cell cycle	http://amigo.geneontology.org/amigo/term/GO:0051726	ANIA_00038 ANIA_00410 ANIA_00504 ANIA_00556 ANIA_00676 ANIA_00699 ANIA_00807 ANIA_00872 ANIA_00905 ANIA_01191 ANIA_01207 ANIA_01359 ANIA_01398 ANIA_01485 ANIA_01545 ANIA_01661 ANIA_01668 ANIA_01779 ANIA_01867 ANIA_01967 ANIA_02059 ANIA_02172 ANIA_02211 ANIA_02246 ANIA_02302 ANIA_02412 ANIA_02439 ANIA_02969 ANIA_03040 ANIA_03065 ANIA_03090 ANIA_03118 ANIA_03411 ANIA_03422 ANIA_03450 ANIA_03619 ANI…
2.04312e-08	337	869	1.32433	Regulation of biosynthetic process	http://amigo.geneontology.org/amigo/term/GO:0009889	ANIA_00083 ANIA_00094 ANIA_00096 ANIA_00134 ANIA_00138 ANIA_00148 ANIA_00154 ANIA_00167 ANIA_00191 ANIA_00197 ANIA_00202 ANIA_00256 ANIA_00327 ANIA_00388 ANIA_00410 ANIA_00486 ANIA_00504 ANIA_00505 ANIA_00507 ANIA_00554 ANIA_00568 ANIA_00671 ANIA_00680 ANIA_00719 ANIA_00720 ANIA_00807 ANIA_00816 ANIA_00891 ANIA_00902 ANIA_00937 ANIA_01028 ANIA_01052 ANIA_01132 ANIA_01190 ANIA_01205 ANIA_01227 ANI…
2.12939e-08	326	837	1.33079	Regulation of cellular macromolecule biosynthetic process	http://amigo.geneontology.org/amigo/term/GO:2000112	ANIA_00083 ANIA_00094 ANIA_00096 ANIA_00134 ANIA_00138 ANIA_00148 ANIA_00154 ANIA_00167 ANIA_00191 ANIA_00197 ANIA_00202 ANIA_00327 ANIA_00388 ANIA_00410 ANIA_00486 ANIA_00505 ANIA_00507 ANIA_00554 ANIA_00568 ANIA_00671 ANIA_00680 ANIA_00719 ANIA_00720 ANIA_00807 ANIA_00891 ANIA_00902 ANIA_00937 ANIA_01028 ANIA_01052 ANIA_01132 ANIA_01190 ANIA_01205 ANIA_01227 ANIA_01265 ANIA_01272 ANIA_01286 ANI…
2.25324e-08	335	864	1.32419	Regulation of cellular biosynthetic process	http://amigo.geneontology.org/amigo/term/GO:0031326	ANIA_00083 ANIA_00094 ANIA_00096 ANIA_00134 ANIA_00138 ANIA_00148 ANIA_00154 ANIA_00167 ANIA_00191 ANIA_00197 ANIA_00202 ANIA_00256 ANIA_00327 ANIA_00388 ANIA_00410 ANIA_00486 ANIA_00504 ANIA_00505 ANIA_00507 ANIA_00554 ANIA_00568 ANIA_00671 ANIA_00680 ANIA_00719 ANIA_00720 ANIA_00807 ANIA_00816 ANIA_00891 ANIA_00902 ANIA_00937 ANIA_01028 ANIA_01052 ANIA_01132 ANIA_01190 ANIA_01205 ANIA_01227 ANI…
2.73511e-08	380	1001	1.29662	Nucleobase-containing compound biosynthetic process	http://amigo.geneontology.org/amigo/term/GO:0034654	ANIA_00083 ANIA_00094 ANIA_00096 ANIA_00097 ANIA_00134 ANIA_00138 ANIA_00148 ANIA_00154 ANIA_00191 ANIA_00192 ANIA_00197 ANIA_00202 ANIA_00260 ANIA_00321 ANIA_00327 ANIA_00388 ANIA_00410 ANIA_00434 ANIA_00486 ANIA_00490 ANIA_00495 ANIA_00507 ANIA_00554 ANIA_00565 ANIA_00568 ANIA_00591 ANIA_00662 ANIA_00667 ANIA_00671 ANIA_00680 ANIA_00719 ANIA_00743 ANIA_00807 ANIA_00816 ANIA_00891 ANIA_00893 ANI…
2.78596e-08	327	842	1.32683	Regulation of macromolecule biosynthetic process	http://amigo.geneontology.org/amigo/term/GO:0010556	ANIA_00083 ANIA_00094 ANIA_00096 ANIA_00134 ANIA_00138 ANIA_00148 ANIA_00154 ANIA_00167 ANIA_00191 ANIA_00197 ANIA_00202 ANIA_00327 ANIA_00388 ANIA_00410 ANIA_00486 ANIA_00505 ANIA_00507 ANIA_00554 ANIA_00568 ANIA_00671 ANIA_00680 ANIA_00719 ANIA_00720 ANIA_00807 ANIA_00816 ANIA_00891 ANIA_00902 ANIA_00937 ANIA_01028 ANIA_01052 ANIA_01132 ANIA_01190 ANIA_01205 ANIA_01227 ANIA_01265 ANIA_01272 ANI…
2.86429e-08	333	857	1.3225	Cellular response to stimulus	http://amigo.geneontology.org/amigo/term/GO:0051716	ANIA_00038 ANIA_00076 ANIA_00097 ANIA_00106 ANIA_00120 ANIA_00126 ANIA_00138 ANIA_00158 ANIA_00163 ANIA_00179 ANIA_00241 ANIA_00256 ANIA_00327 ANIA_00388 ANIA_00410 ANIA_00437 ANIA_00439 ANIA_00449 ANIA_00504 ANIA_00551 ANIA_00554 ANIA_00556 ANIA_00568 ANIA_00575 ANIA_00582 ANIA_00596 ANIA_00641 ANIA_00671 ANIA_00676 ANIA_00687 ANIA_00797 ANIA_00810 ANIA_00822 ANIA_00836 ANIA_00847 ANIA_00872 ANI…
7.0146e-08	94	184	1.7205	Mitotic cell cycle process	http://amigo.geneontology.org/amigo/term/GO:1903047	ANIA_00084 ANIA_00143 ANIA_00410 ANIA_00504 ANIA_00556 ANIA_00676 ANIA_00848 ANIA_00872 ANIA_00905 ANIA_00960 ANIA_01005 ANIA_01056 ANIA_01171 ANIA_01182 ANIA_01191 ANIA_01207 ANIA_01223 ANIA_01237 ANIA_01286 ANIA_01398 ANIA_01545 ANIA_01779 ANIA_01867 ANIA_02160 ANIA_02302 ANIA_02412 ANIA_02439 ANIA_02491 ANIA_02963 ANIA_02969 ANIA_03040 ANIA_03067 ANIA_03118 ANIA_03154 ANIA_03187 ANIA_03450 ANI…
9.28435e-08	107	218	1.653	Mitotic cell cycle	http://amigo.geneontology.org/amigo/term/GO:0000278	ANIA_00084 ANIA_00143 ANIA_00166 ANIA_00410 ANIA_00504 ANIA_00556 ANIA_00676 ANIA_00848 ANIA_00872 ANIA_00905 ANIA_00960 ANIA_01005 ANIA_01056 ANIA_01171 ANIA_01182 ANIA_01191 ANIA_01207 ANIA_01223 ANIA_01237 ANIA_01286 ANIA_01398 ANIA_01545 ANIA_01779 ANIA_01867 ANIA_02160 ANIA_02302 ANIA_02412 ANIA_02439 ANIA_02491 ANIA_02963 ANIA_02969 ANIA_03040 ANIA_03067 ANIA_03118 ANIA_03154 ANIA_03187 ANI…
1.07044e-07	142	313	1.53771	Cell cycle process	http://amigo.geneontology.org/amigo/term/GO:0022402	ANIA_00038 ANIA_00084 ANIA_00129 ANIA_00143 ANIA_00410 ANIA_00414 ANIA_00504 ANIA_00556 ANIA_00673 ANIA_00676 ANIA_00807 ANIA_00848 ANIA_00872 ANIA_00905 ANIA_00960 ANIA_01005 ANIA_01056 ANIA_01171 ANIA_01182 ANIA_01191 ANIA_01207 ANIA_01223 ANIA_01237 ANIA_01286 ANIA_01359 ANIA_01394 ANIA_01398 ANIA_01435 ANIA_01545 ANIA_01661 ANIA_01708 ANIA_01779 ANIA_01843 ANIA_01867 ANIA_01967 ANIA_02059 ANI…
1.21639e-07	155	351	1.50435	Host intracellular organelle	http://amigo.geneontology.org/amigo/term/GO:0033647	ANIA_00094 ANIA_00096 ANIA_00148 ANIA_00197 ANIA_00202 ANIA_00388 ANIA_00507 ANIA_00568 ANIA_00680 ANIA_00891 ANIA_00902 ANIA_00937 ANIA_01028 ANIA_01303 ANIA_01406 ANIA_01584 ANIA_01599 ANIA_01705 ANIA_01729 ANIA_02001 ANIA_02142 ANIA_02172 ANIA_02211 ANIA_02304 ANIA_02324 ANIA_02446 ANIA_02650 ANIA_02725 ANIA_02763 ANIA_02765 ANIA_02782 ANIA_02826 ANIA_03050 ANIA_03075 ANIA_03120 ANIA_03217 ANI…
1.21639e-07	155	351	1.50435	Host intracellular membrane-bounded organelle	http://amigo.geneontology.org/amigo/term/GO:0033648	ANIA_00094 ANIA_00096 ANIA_00148 ANIA_00197 ANIA_00202 ANIA_00388 ANIA_00507 ANIA_00568 ANIA_00680 ANIA_00891 ANIA_00902 ANIA_00937 ANIA_01028 ANIA_01303 ANIA_01406 ANIA_01584 ANIA_01599 ANIA_01705 ANIA_01729 ANIA_02001 ANIA_02142 ANIA_02172 ANIA_02211 ANIA_02304 ANIA_02324 ANIA_02446 ANIA_02650 ANIA_02725 ANIA_02763 ANIA_02765 ANIA_02782 ANIA_02826 ANIA_03050 ANIA_03075 ANIA_03120 ANIA_03217 ANI…
1.21639e-07	155	351	1.50435	Host cell nucleus	http://amigo.geneontology.org/amigo/term/GO:0042025	ANIA_00094 ANIA_00096 ANIA_00148 ANIA_00197 ANIA_00202 ANIA_00388 ANIA_00507 ANIA_00568 ANIA_00680 ANIA_00891 ANIA_00902 ANIA_00937 ANIA_01028 ANIA_01303 ANIA_01406 ANIA_01584 ANIA_01599 ANIA_01705 ANIA_01729 ANIA_02001 ANIA_02142 ANIA_02172 ANIA_02211 ANIA_02304 ANIA_02324 ANIA_02446 ANIA_02650 ANIA_02725 ANIA_02763 ANIA_02765 ANIA_02782 ANIA_02826 ANIA_03050 ANIA_03075 ANIA_03120 ANIA_03217 ANI…
1.39772e-07	313	812	1.31765	Regulation of nucleobase-containing compound metabolic process	http://amigo.geneontology.org/amigo/term/GO:0019219	ANIA_00083 ANIA_00094 ANIA_00096 ANIA_00134 ANIA_00138 ANIA_00148 ANIA_00154 ANIA_00191 ANIA_00197 ANIA_00202 ANIA_00327 ANIA_00388 ANIA_00410 ANIA_00486 ANIA_00504 ANIA_00507 ANIA_00554 ANIA_00565 ANIA_00568 ANIA_00671 ANIA_00680 ANIA_00719 ANIA_00807 ANIA_00816 ANIA_00891 ANIA_00902 ANIA_00937 ANIA_01028 ANIA_01052 ANIA_01132 ANIA_01190 ANIA_01205 ANIA_01227 ANIA_01265 ANIA_01272 ANIA_01286 ANI…
1.39772e-07	155	352	1.50002	Host cellular component	http://amigo.geneontology.org/amigo/term/GO:0018995	ANIA_00094 ANIA_00096 ANIA_00148 ANIA_00197 ANIA_00202 ANIA_00388 ANIA_00507 ANIA_00568 ANIA_00680 ANIA_00891 ANIA_00902 ANIA_00937 ANIA_01028 ANIA_01303 ANIA_01406 ANIA_01584 ANIA_01599 ANIA_01705 ANIA_01729 ANIA_02001 ANIA_02142 ANIA_02172 ANIA_02211 ANIA_02304 ANIA_02324 ANIA_02446 ANIA_02650 ANIA_02725 ANIA_02763 ANIA_02765 ANIA_02782 ANIA_02826 ANIA_03050 ANIA_03075 ANIA_03120 ANIA_03217 ANI…
1.39772e-07	155	352	1.50002	Host cell part	http://amigo.geneontology.org/amigo/term/GO:0033643	ANIA_00094 ANIA_00096 ANIA_00148 ANIA_00197 ANIA_00202 ANIA_00388 ANIA_00507 ANIA_00568 ANIA_00680 ANIA_00891 ANIA_00902 ANIA_00937 ANIA_01028 ANIA_01303 ANIA_01406 ANIA_01584 ANIA_01599 ANIA_01705 ANIA_01729 ANIA_02001 ANIA_02142 ANIA_02172 ANIA_02211 ANIA_02304 ANIA_02324 ANIA_02446 ANIA_02650 ANIA_02725 ANIA_02763 ANIA_02765 ANIA_02782 ANIA_02826 ANIA_03050 ANIA_03075 ANIA_03120 ANIA_03217 ANI…
1.39772e-07	155	352	1.50002	Host intracellular part	http://amigo.geneontology.org/amigo/term/GO:0033646	ANIA_00094 ANIA_00096 ANIA_00148 ANIA_00197 ANIA_00202 ANIA_00388 ANIA_00507 ANIA_00568 ANIA_00680 ANIA_00891 ANIA_00902 ANIA_00937 ANIA_01028 ANIA_01303 ANIA_01406 ANIA_01584 ANIA_01599 ANIA_01705 ANIA_01729 ANIA_02001 ANIA_02142 ANIA_02172 ANIA_02211 ANIA_02304 ANIA_02324 ANIA_02446 ANIA_02650 ANIA_02725 ANIA_02763 ANIA_02765 ANIA_02782 ANIA_02826 ANIA_03050 ANIA_03075 ANIA_03120 ANIA_03217 ANI…
1.39772e-07	155	352	1.50002	Host intracellular region	http://amigo.geneontology.org/amigo/term/GO:0043656	ANIA_00094 ANIA_00096 ANIA_00148 ANIA_00197 ANIA_00202 ANIA_00388 ANIA_00507 ANIA_00568 ANIA_00680 ANIA_00891 ANIA_00902 ANIA_00937 ANIA_01028 ANIA_01303 ANIA_01406 ANIA_01584 ANIA_01599 ANIA_01705 ANIA_01729 ANIA_02001 ANIA_02142 ANIA_02172 ANIA_02211 ANIA_02304 ANIA_02324 ANIA_02446 ANIA_02650 ANIA_02725 ANIA_02763 ANIA_02765 ANIA_02782 ANIA_02826 ANIA_03050 ANIA_03075 ANIA_03120 ANIA_03217 ANI…
1.39772e-07	155	352	1.50002	Host cell	http://amigo.geneontology.org/amigo/term/GO:0043657	ANIA_00094 ANIA_00096 ANIA_00148 ANIA_00197 ANIA_00202 ANIA_00388 ANIA_00507 ANIA_00568 ANIA_00680 ANIA_00891 ANIA_00902 ANIA_00937 ANIA_01028 ANIA_01303 ANIA_01406 ANIA_01584 ANIA_01599 ANIA_01705 ANIA_01729 ANIA_02001 ANIA_02142 ANIA_02172 ANIA_02211 ANIA_02304 ANIA_02324 ANIA_02446 ANIA_02650 ANIA_02725 ANIA_02763 ANIA_02765 ANIA_02782 ANIA_02826 ANIA_03050 ANIA_03075 ANIA_03120 ANIA_03217 ANI…
1.40892e-07	46	76	2.15165	Glycosyl compound metabolic process	http://amigo.geneontology.org/amigo/term/GO:1901657	ANIA_00128 ANIA_00130 ANIA_00502 ANIA_00662 ANIA_01071 ANIA_01498 ANIA_01580 ANIA_01806 ANIA_01965 ANIA_02494 ANIA_03013 ANIA_03169 ANIA_03222 ANIA_03340 ANIA_03547 ANIA_03557 ANIA_03881 ANIA_04382 ANIA_04561 ANIA_05237 ANIA_05492 ANIA_05884 ANIA_06072 ANIA_06490 ANIA_06711 ANIA_07108 ANIA_07363 ANIA_07502 ANIA_07624 ANIA_08019 ANIA_08214 ANIA_08323 ANIA_08457 ANIA_08524 ANIA_08533 ANIA_08545 ANI…
1.56246e-07	420	1136	1.26067	Heterocycle biosynthetic process	http://amigo.geneontology.org/amigo/term/GO:0018130	ANIA_00083 ANIA_00094 ANIA_00096 ANIA_00097 ANIA_00106 ANIA_00121 ANIA_00134 ANIA_00138 ANIA_00148 ANIA_00150 ANIA_00154 ANIA_00191 ANIA_00192 ANIA_00197 ANIA_00202 ANIA_00256 ANIA_00260 ANIA_00270 ANIA_00321 ANIA_00327 ANIA_00388 ANIA_00410 ANIA_00434 ANIA_00486 ANIA_00490 ANIA_00495 ANIA_00507 ANIA_00554 ANIA_00565 ANIA_00568 ANIA_00591 ANIA_00648 ANIA_00662 ANIA_00667 ANIA_00671 ANIA_00680 ANI…
1.61925e-07	234	579	1.38015	ATP binding	http://amigo.geneontology.org/amigo/term/GO:0005524	ANIA_00034 ANIA_00038 ANIA_00097 ANIA_00106 ANIA_00114 ANIA_00124 ANIA_00126 ANIA_00161 ANIA_00327 ANIA_00349 ANIA_00381 ANIA_00424 ANIA_00490 ANIA_00561 ANIA_00565 ANIA_00576 ANIA_00637 ANIA_00646 ANIA_00673 ANIA_00699 ANIA_00705 ANIA_00797 ANIA_00822 ANIA_00847 ANIA_00866 ANIA_00948 ANIA_01171 ANIA_01201 ANIA_01207 ANIA_01237 ANIA_01296 ANIA_01326 ANIA_01380 ANIA_01479 ANIA_01485 ANIA_01498 ANI…
2.05303e-07	208	504	1.40663	Positive regulation of cellular process	http://amigo.geneontology.org/amigo/term/GO:0048522	ANIA_00106 ANIA_00124 ANIA_00148 ANIA_00184 ANIA_00202 ANIA_00256 ANIA_00306 ANIA_00388 ANIA_00410 ANIA_00439 ANIA_00486 ANIA_00504 ANIA_00505 ANIA_00554 ANIA_00568 ANIA_00671 ANIA_00673 ANIA_00807 ANIA_00872 ANIA_00891 ANIA_00905 ANIA_00910 ANIA_00911 ANIA_00953 ANIA_01167 ANIA_01227 ANIA_01303 ANIA_01306 ANIA_01369 ANIA_01398 ANIA_01406 ANIA_01494 ANIA_01545 ANIA_01584 ANIA_01661 ANIA_01668 ANI…
2.16775e-07	304	791	1.31765	DNA binding	http://amigo.geneontology.org/amigo/term/GO:0003677	ANIA_00094 ANIA_00096 ANIA_00097 ANIA_00126 ANIA_00138 ANIA_00148 ANIA_00197 ANIA_00202 ANIA_00260 ANIA_00321 ANIA_00388 ANIA_00424 ANIA_00434 ANIA_00437 ANIA_00486 ANIA_00507 ANIA_00532 ANIA_00568 ANIA_00582 ANIA_00596 ANIA_00646 ANIA_00671 ANIA_00680 ANIA_00719 ANIA_00872 ANIA_00891 ANIA_00902 ANIA_00937 ANIA_01028 ANIA_01152 ANIA_01207 ANIA_01237 ANIA_01259 ANIA_01265 ANIA_01303 ANIA_01391 ANI…
2.2495e-07	212	516	1.39995	Positive regulation of biological process	http://amigo.geneontology.org/amigo/term/GO:0048518	ANIA_00106 ANIA_00124 ANIA_00148 ANIA_00184 ANIA_00202 ANIA_00256 ANIA_00306 ANIA_00388 ANIA_00410 ANIA_00439 ANIA_00486 ANIA_00504 ANIA_00505 ANIA_00554 ANIA_00568 ANIA_00641 ANIA_00671 ANIA_00673 ANIA_00807 ANIA_00872 ANIA_00891 ANIA_00905 ANIA_00910 ANIA_00911 ANIA_00953 ANIA_01167 ANIA_01227 ANIA_01303 ANIA_01306 ANIA_01369 ANIA_01398 ANIA_01406 ANIA_01494 ANIA_01545 ANIA_01584 ANIA_01661 ANI…
2.40146e-07	196	471	1.41954	Cellular response to stress	http://amigo.geneontology.org/amigo/term/GO:0033554	ANIA_00038 ANIA_00076 ANIA_00097 ANIA_00126 ANIA_00138 ANIA_00158 ANIA_00241 ANIA_00327 ANIA_00410 ANIA_00437 ANIA_00439 ANIA_00504 ANIA_00551 ANIA_00554 ANIA_00556 ANIA_00582 ANIA_00596 ANIA_00641 ANIA_00671 ANIA_00810 ANIA_00836 ANIA_00847 ANIA_00872 ANIA_00953 ANIA_01023 ANIA_01237 ANIA_01272 ANIA_01479 ANIA_01485 ANIA_01639 ANIA_01665 ANIA_01668 ANIA_01708 ANIA_01733 ANIA_01800 ANIA_01812 ANI…
2.79813e-07	119	255	1.57783	Chromosome	http://amigo.geneontology.org/amigo/term/GO:0005694	ANIA_00038 ANIA_00083 ANIA_00126 ANIA_00143 ANIA_00166 ANIA_00260 ANIA_00327 ANIA_00556 ANIA_00582 ANIA_00872 ANIA_00960 ANIA_01056 ANIA_01191 ANIA_01207 ANIA_01208 ANIA_01237 ANIA_01259 ANIA_01286 ANIA_01398 ANIA_01399 ANIA_01401 ANIA_01432 ANIA_01435 ANIA_01660 ANIA_01690 ANIA_01905 ANIA_01906 ANIA_01929 ANIA_01976 ANIA_01977 ANIA_02087 ANIA_02141 ANIA_02143 ANIA_02160 ANIA_02214 ANIA_02417 ANI…
3.19357e-07	413	1121	1.25646	Aromatic compound biosynthetic process	http://amigo.geneontology.org/amigo/term/GO:0019438	ANIA_00050 ANIA_00083 ANIA_00094 ANIA_00096 ANIA_00097 ANIA_00121 ANIA_00134 ANIA_00138 ANIA_00148 ANIA_00150 ANIA_00154 ANIA_00191 ANIA_00192 ANIA_00197 ANIA_00202 ANIA_00260 ANIA_00270 ANIA_00321 ANIA_00327 ANIA_00388 ANIA_00410 ANIA_00434 ANIA_00486 ANIA_00490 ANIA_00495 ANIA_00507 ANIA_00554 ANIA_00565 ANIA_00568 ANIA_00591 ANIA_00648 ANIA_00662 ANIA_00667 ANIA_00671 ANIA_00680 ANIA_00719 ANI…
4.37958e-07	118	255	1.57075	Chromosome organization	http://amigo.geneontology.org/amigo/term/GO:0051276	ANIA_00038 ANIA_00083 ANIA_00143 ANIA_00327 ANIA_00410 ANIA_00424 ANIA_00434 ANIA_00437 ANIA_00504 ANIA_00556 ANIA_00676 ANIA_00719 ANIA_00848 ANIA_00905 ANIA_00960 ANIA_01182 ANIA_01190 ANIA_01191 ANIA_01223 ANIA_01237 ANIA_01286 ANIA_01398 ANIA_01545 ANIA_01660 ANIA_01708 ANIA_01729 ANIA_01906 ANIA_01976 ANIA_02087 ANIA_02141 ANIA_02143 ANIA_02160 ANIA_02271 ANIA_02302 ANIA_02417 ANIA_02439 ANI…
4.54328e-07	40	64	2.20839	Nucleoside metabolic process	http://amigo.geneontology.org/amigo/term/GO:0009116	ANIA_00662 ANIA_01071 ANIA_01498 ANIA_01580 ANIA_01806 ANIA_01965 ANIA_02494 ANIA_03169 ANIA_03222 ANIA_03340 ANIA_03547 ANIA_03557 ANIA_03881 ANIA_04382 ANIA_04561 ANIA_05237 ANIA_05492 ANIA_05884 ANIA_06072 ANIA_06490 ANIA_06711 ANIA_07108 ANIA_07363 ANIA_07502 ANIA_08019 ANIA_08214 ANIA_08323 ANIA_08457 ANIA_08524 ANIA_08533 ANIA_08545 ANIA_08571 ANIA_08611 ANIA_08847 ANIA_08869 ANIA_09083 ANI…
6.59648e-07	385	1046	1.26129	Nucleotide binding	http://amigo.geneontology.org/amigo/term/GO:0000166	ANIA_00034 ANIA_00038 ANIA_00097 ANIA_00106 ANIA_00114 ANIA_00124 ANIA_00126 ANIA_00161 ANIA_00327 ANIA_00330 ANIA_00347 ANIA_00349 ANIA_00381 ANIA_00403 ANIA_00424 ANIA_00449 ANIA_00490 ANIA_00502 ANIA_00561 ANIA_00565 ANIA_00576 ANIA_00593 ANIA_00623 ANIA_00628 ANIA_00637 ANIA_00646 ANIA_00672 ANIA_00673 ANIA_00676 ANIA_00699 ANIA_00701 ANIA_00705 ANIA_00797 ANIA_00804 ANIA_00822 ANIA_00836 ANI…
6.59648e-07	385	1046	1.26129	Nucleoside phosphate binding	http://amigo.geneontology.org/amigo/term/GO:1901265	ANIA_00034 ANIA_00038 ANIA_00097 ANIA_00106 ANIA_00114 ANIA_00124 ANIA_00126 ANIA_00161 ANIA_00327 ANIA_00330 ANIA_00347 ANIA_00349 ANIA_00381 ANIA_00403 ANIA_00424 ANIA_00449 ANIA_00490 ANIA_00502 ANIA_00561 ANIA_00565 ANIA_00576 ANIA_00593 ANIA_00623 ANIA_00628 ANIA_00637 ANIA_00646 ANIA_00672 ANIA_00673 ANIA_00676 ANIA_00699 ANIA_00701 ANIA_00705 ANIA_00797 ANIA_00804 ANIA_00822 ANIA_00836 ANI…
7.11146e-07	345	918	1.27961	Response to stimulus	http://amigo.geneontology.org/amigo/term/GO:0050896	ANIA_00038 ANIA_00076 ANIA_00097 ANIA_00106 ANIA_00120 ANIA_00126 ANIA_00138 ANIA_00158 ANIA_00163 ANIA_00179 ANIA_00241 ANIA_00256 ANIA_00327 ANIA_00388 ANIA_00410 ANIA_00437 ANIA_00439 ANIA_00449 ANIA_00504 ANIA_00551 ANIA_00554 ANIA_00556 ANIA_00568 ANIA_00575 ANIA_00582 ANIA_00596 ANIA_00641 ANIA_00671 ANIA_00676 ANIA_00687 ANIA_00797 ANIA_00810 ANIA_00822 ANIA_00836 ANIA_00847 ANIA_00872 ANI…
7.48801e-07	303	795	1.30325	Regulation of RNA metabolic process	http://amigo.geneontology.org/amigo/term/GO:0051252	ANIA_00083 ANIA_00094 ANIA_00096 ANIA_00134 ANIA_00138 ANIA_00148 ANIA_00154 ANIA_00191 ANIA_00197 ANIA_00202 ANIA_00327 ANIA_00388 ANIA_00410 ANIA_00486 ANIA_00507 ANIA_00554 ANIA_00568 ANIA_00671 ANIA_00680 ANIA_00719 ANIA_00807 ANIA_00816 ANIA_00891 ANIA_00902 ANIA_00937 ANIA_01028 ANIA_01052 ANIA_01132 ANIA_01190 ANIA_01205 ANIA_01227 ANIA_01265 ANIA_01272 ANIA_01286 ANIA_01303 ANIA_01369 ANI…
7.77455e-07	73	140	1.7687	Supramolecular complex	http://amigo.geneontology.org/amigo/term/GO:0099080	ANIA_00108 ANIA_00143 ANIA_00166 ANIA_00641 ANIA_00676 ANIA_00960 ANIA_01005 ANIA_01055 ANIA_01056 ANIA_01182 ANIA_01325 ANIA_01398 ANIA_01401 ANIA_01432 ANIA_01977 ANIA_02065 ANIA_02439 ANIA_02482 ANIA_02759 ANIA_02862 ANIA_02886 ANIA_03187 ANIA_03411 ANIA_03547 ANIA_03710 ANIA_03724 ANIA_03970 ANIA_04000 ANIA_04804 ANIA_04867 ANIA_04961 ANIA_04965 ANIA_04967 ANIA_05116 ANIA_05154 ANIA_05181 ANI…
8.53855e-07	45	74	2.07604	Double-strand break repair	http://amigo.geneontology.org/amigo/term/GO:0006302	ANIA_00097 ANIA_00437 ANIA_00556 ANIA_00582 ANIA_00872 ANIA_01237 ANIA_01843 ANIA_02087 ANIA_02139 ANIA_02214 ANIA_02491 ANIA_02637 ANIA_02764 ANIA_03040 ANIA_03118 ANIA_03129 ANIA_03450 ANIA_03619 ANIA_03940 ANIA_04432 ANIA_04519 ANIA_04552 ANIA_04789 ANIA_05092 ANIA_05901 ANIA_05992 ANIA_06261 ANIA_06583 ANIA_06616 ANIA_06728 ANIA_06827 ANIA_06878 ANIA_07423 ANIA_07499 ANIA_07753 ANIA_08742 ANI…
1.17224e-06	64	118	1.8266	Regulation of cell cycle process	http://amigo.geneontology.org/amigo/term/GO:0010564	ANIA_00038 ANIA_00410 ANIA_00504 ANIA_00556 ANIA_00676 ANIA_00807 ANIA_00872 ANIA_00905 ANIA_01191 ANIA_01207 ANIA_01359 ANIA_01398 ANIA_01545 ANIA_01661 ANIA_01779 ANIA_01967 ANIA_02059 ANIA_02246 ANIA_02302 ANIA_02439 ANIA_02969 ANIA_03040 ANIA_03090 ANIA_03118 ANIA_03450 ANIA_03619 ANIA_03719 ANIA_03737 ANIA_03946 ANIA_04085 ANIA_04182 ANIA_04279 ANIA_04399 ANIA_04571 ANIA_04735 ANIA_05028 ANI…
1.33289e-06	478	1340	1.22048	RNA metabolic process	http://amigo.geneontology.org/amigo/term/GO:0016070	ANIA_00083 ANIA_00094 ANIA_00096 ANIA_00114 ANIA_00119 ANIA_00124 ANIA_00128 ANIA_00130 ANIA_00134 ANIA_00138 ANIA_00148 ANIA_00154 ANIA_00161 ANIA_00189 ANIA_00191 ANIA_00192 ANIA_00197 ANIA_00202 ANIA_00237 ANIA_00258 ANIA_00260 ANIA_00321 ANIA_00327 ANIA_00388 ANIA_00410 ANIA_00421 ANIA_00434 ANIA_00475 ANIA_00486 ANIA_00502 ANIA_00504 ANIA_00505 ANIA_00507 ANIA_00554 ANIA_00568 ANIA_00632 ANI…
1.91315e-06	266	685	1.3174	Cytosol	http://amigo.geneontology.org/amigo/term/GO:0005829	ANIA_00009 ANIA_00034 ANIA_00050 ANIA_00120 ANIA_00124 ANIA_00127 ANIA_00128 ANIA_00134 ANIA_00163 ANIA_00179 ANIA_00184 ANIA_00270 ANIA_00278 ANIA_00321 ANIA_00381 ANIA_00423 ANIA_00434 ANIA_00504 ANIA_00554 ANIA_00565 ANIA_00667 ANIA_00699 ANIA_00719 ANIA_00797 ANIA_00865 ANIA_00907 ANIA_00912 ANIA_01038 ANIA_01056 ANIA_01103 ANIA_01122 ANIA_01166 ANIA_01205 ANIA_01228 ANIA_01272 ANIA_01283 ANI…
2.2523e-06	161	389	1.43443	Catalytic activity, acting on a nucleic acid	http://amigo.geneontology.org/amigo/term/GO:0140640	ANIA_00076 ANIA_00083 ANIA_00097 ANIA_00119 ANIA_00128 ANIA_00130 ANIA_00189 ANIA_00192 ANIA_00260 ANIA_00321 ANIA_00327 ANIA_00424 ANIA_00437 ANIA_00502 ANIA_00556 ANIA_00637 ANIA_00646 ANIA_00685 ANIA_00705 ANIA_00872 ANIA_00956 ANIA_01201 ANIA_01237 ANIA_01296 ANIA_01380 ANIA_01479 ANIA_01708 ANIA_01751 ANIA_01913 ANIA_02065 ANIA_02087 ANIA_02138 ANIA_02139 ANIA_02150 ANIA_02160 ANIA_02190 ANI…
2.39211e-06	258	664	1.3205	Catalytic activity, acting on a protein	http://amigo.geneontology.org/amigo/term/GO:0140096	ANIA_00038 ANIA_00065 ANIA_00103 ANIA_00106 ANIA_00124 ANIA_00129 ANIA_00134 ANIA_00164 ANIA_00173 ANIA_00224 ANIA_00256 ANIA_00349 ANIA_00410 ANIA_00504 ANIA_00576 ANIA_00690 ANIA_00699 ANIA_00810 ANIA_00822 ANIA_00883 ANIA_00905 ANIA_01171 ANIA_01326 ANIA_01358 ANIA_01485 ANIA_01539 ANIA_01545 ANIA_01573 ANIA_01638 ANIA_01639 ANIA_01658 ANIA_01665 ANIA_01706 ANIA_01746 ANIA_01757 ANIA_01780 ANI…
2.53044e-06	145	339	1.46207	Negative regulation of biological process	http://amigo.geneontology.org/amigo/term/GO:0048519	ANIA_00038 ANIA_00119 ANIA_00184 ANIA_00410 ANIA_00434 ANIA_00439 ANIA_00486 ANIA_00504 ANIA_00505 ANIA_00556 ANIA_00565 ANIA_00632 ANIA_00641 ANIA_00646 ANIA_00671 ANIA_00676 ANIA_00767 ANIA_00847 ANIA_01132 ANIA_01191 ANIA_01207 ANIA_01272 ANIA_01286 ANIA_01306 ANIA_01359 ANIA_01400 ANIA_01545 ANIA_01669 ANIA_01708 ANIA_01779 ANIA_01812 ANIA_01867 ANIA_01967 ANIA_01976 ANIA_02021 ANIA_02065 ANI…
2.81694e-06	157	372	1.4368	Transferase activity, transferring phosphorus-containing groups	http://amigo.geneontology.org/amigo/term/GO:0016772	ANIA_00034 ANIA_00038 ANIA_00106 ANIA_00124 ANIA_00156 ANIA_00161 ANIA_00192 ANIA_00193 ANIA_00260 ANIA_00270 ANIA_00321 ANIA_00576 ANIA_00591 ANIA_00699 ANIA_00804 ANIA_00822 ANIA_01171 ANIA_01272 ANIA_01296 ANIA_01305 ANIA_01326 ANIA_01404 ANIA_01485 ANIA_01498 ANIA_01568 ANIA_01665 ANIA_01668 ANIA_01680 ANIA_01694 ANIA_01800 ANIA_01867 ANIA_01911 ANIA_01965 ANIA_02180 ANIA_02246 ANIA_02311 ANI…
3.88748e-06	93	197	1.60618	Regulation of protein metabolic process	http://amigo.geneontology.org/amigo/term/GO:0051246	ANIA_00167 ANIA_00410 ANIA_00505 ANIA_00720 ANIA_00906 ANIA_00910 ANIA_00911 ANIA_01167 ANIA_01191 ANIA_01272 ANIA_01344 ANIA_01400 ANIA_01545 ANIA_01665 ANIA_01668 ANIA_01779 ANIA_02065 ANIA_02080 ANIA_02172 ANIA_02180 ANIA_02211 ANIA_02214 ANIA_02246 ANIA_02304 ANIA_02482 ANIA_02775 ANIA_03055 ANIA_03095 ANIA_03411 ANIA_03422 ANIA_03625 ANIA_03905 ANIA_04000 ANIA_04015 ANIA_04066 ANIA_04085 ANI…
4.15326e-06	59	110	1.82294	Positive regulation of molecular function	http://amigo.geneontology.org/amigo/term/GO:0044093	ANIA_00084 ANIA_00108 ANIA_00261 ANIA_00504 ANIA_00911 ANIA_01167 ANIA_01535 ANIA_01629 ANIA_01661 ANIA_01668 ANIA_01779 ANIA_01931 ANIA_01980 ANIA_02172 ANIA_02211 ANIA_02222 ANIA_02514 ANIA_02520 ANIA_02878 ANIA_03095 ANIA_03422 ANIA_03905 ANIA_03937 ANIA_04000 ANIA_04066 ANIA_04274 ANIA_04385 ANIA_04449 ANIA_04457 ANIA_04537 ANIA_04571 ANIA_04862 ANIA_04890 ANIA_04998 ANIA_05617 ANIA_05666 ANI…
4.3696e-06	89	187	1.62018	Regulation of cellular protein metabolic process	http://amigo.geneontology.org/amigo/term/GO:0032268	ANIA_00167 ANIA_00410 ANIA_00505 ANIA_00720 ANIA_00906 ANIA_00910 ANIA_00911 ANIA_01167 ANIA_01191 ANIA_01272 ANIA_01344 ANIA_01400 ANIA_01545 ANIA_01665 ANIA_01668 ANIA_01779 ANIA_02065 ANIA_02080 ANIA_02172 ANIA_02211 ANIA_02214 ANIA_02246 ANIA_02482 ANIA_02775 ANIA_03055 ANIA_03095 ANIA_03411 ANIA_03422 ANIA_03625 ANIA_03905 ANIA_04000 ANIA_04015 ANIA_04066 ANIA_04085 ANIA_04163 ANIA_04202 ANI…
4.3696e-06	482	1372	1.2087	Nucleic acid binding	http://amigo.geneontology.org/amigo/term/GO:0003676	ANIA_00094 ANIA_00096 ANIA_00097 ANIA_00119 ANIA_00126 ANIA_00138 ANIA_00148 ANIA_00167 ANIA_00189 ANIA_00197 ANIA_00202 ANIA_00260 ANIA_00321 ANIA_00388 ANIA_00421 ANIA_00424 ANIA_00434 ANIA_00437 ANIA_00486 ANIA_00505 ANIA_00507 ANIA_00532 ANIA_00568 ANIA_00578 ANIA_00582 ANIA_00596 ANIA_00637 ANIA_00646 ANIA_00671 ANIA_00680 ANIA_00705 ANIA_00719 ANIA_00767 ANIA_00872 ANIA_00891 ANIA_00902 ANI…
4.89526e-06	205	515	1.35905	Response to stress	http://amigo.geneontology.org/amigo/term/GO:0006950	ANIA_00038 ANIA_00076 ANIA_00097 ANIA_00126 ANIA_00138 ANIA_00158 ANIA_00241 ANIA_00327 ANIA_00410 ANIA_00437 ANIA_00439 ANIA_00504 ANIA_00551 ANIA_00554 ANIA_00556 ANIA_00582 ANIA_00596 ANIA_00641 ANIA_00671 ANIA_00810 ANIA_00836 ANIA_00847 ANIA_00872 ANIA_00953 ANIA_01023 ANIA_01237 ANIA_01272 ANIA_01390 ANIA_01479 ANIA_01485 ANIA_01639 ANIA_01665 ANIA_01668 ANIA_01708 ANIA_01733 ANIA_01800 ANI…
4.94914e-06	554	1588	1.18914	Gene expression	http://amigo.geneontology.org/amigo/term/GO:0010467	ANIA_00083 ANIA_00094 ANIA_00096 ANIA_00114 ANIA_00119 ANIA_00124 ANIA_00128 ANIA_00130 ANIA_00134 ANIA_00138 ANIA_00148 ANIA_00154 ANIA_00161 ANIA_00167 ANIA_00189 ANIA_00191 ANIA_00192 ANIA_00197 ANIA_00202 ANIA_00237 ANIA_00278 ANIA_00321 ANIA_00327 ANIA_00388 ANIA_00410 ANIA_00421 ANIA_00434 ANIA_00475 ANIA_00486 ANIA_00502 ANIA_00504 ANIA_00505 ANIA_00507 ANIA_00554 ANIA_00568 ANIA_00632 ANI…
5.68133e-06	57	106	1.82823	Positive regulation of catalytic activity	http://amigo.geneontology.org/amigo/term/GO:0043085	ANIA_00084 ANIA_00108 ANIA_00261 ANIA_00504 ANIA_00911 ANIA_01167 ANIA_01535 ANIA_01629 ANIA_01661 ANIA_01668 ANIA_01779 ANIA_01931 ANIA_01980 ANIA_02172 ANIA_02211 ANIA_02222 ANIA_02514 ANIA_02878 ANIA_03095 ANIA_03422 ANIA_03905 ANIA_03937 ANIA_04000 ANIA_04066 ANIA_04274 ANIA_04385 ANIA_04449 ANIA_04457 ANIA_04537 ANIA_04571 ANIA_04862 ANIA_04890 ANIA_04998 ANIA_05617 ANIA_05674 ANIA_05719 ANI…
6.14014e-06	422	1183	1.22413	Small molecule binding	http://amigo.geneontology.org/amigo/term/GO:0036094	ANIA_00034 ANIA_00038 ANIA_00097 ANIA_00106 ANIA_00114 ANIA_00124 ANIA_00126 ANIA_00150 ANIA_00161 ANIA_00321 ANIA_00327 ANIA_00330 ANIA_00347 ANIA_00349 ANIA_00381 ANIA_00403 ANIA_00424 ANIA_00449 ANIA_00490 ANIA_00502 ANIA_00561 ANIA_00565 ANIA_00576 ANIA_00593 ANIA_00623 ANIA_00628 ANIA_00637 ANIA_00646 ANIA_00672 ANIA_00673 ANIA_00676 ANIA_00699 ANIA_00701 ANIA_00705 ANIA_00743 ANIA_00780 ANI…
6.62512e-06	437	1222	1.21832	Organic cyclic compound biosynthetic process	http://amigo.geneontology.org/amigo/term/GO:1901362	ANIA_00050 ANIA_00083 ANIA_00094 ANIA_00096 ANIA_00097 ANIA_00106 ANIA_00121 ANIA_00134 ANIA_00138 ANIA_00148 ANIA_00150 ANIA_00154 ANIA_00191 ANIA_00192 ANIA_00197 ANIA_00202 ANIA_00256 ANIA_00260 ANIA_00270 ANIA_00321 ANIA_00327 ANIA_00388 ANIA_00410 ANIA_00434 ANIA_00486 ANIA_00490 ANIA_00495 ANIA_00507 ANIA_00554 ANIA_00565 ANIA_00568 ANIA_00591 ANIA_00648 ANIA_00662 ANIA_00667 ANIA_00671 ANI…
9.31064e-06	113	253	1.51016	Kinase activity	http://amigo.geneontology.org/amigo/term/GO:0016301	ANIA_00034 ANIA_00038 ANIA_00106 ANIA_00124 ANIA_00156 ANIA_00161 ANIA_00193 ANIA_00270 ANIA_00576 ANIA_00699 ANIA_00822 ANIA_01171 ANIA_01272 ANIA_01296 ANIA_01326 ANIA_01404 ANIA_01485 ANIA_01568 ANIA_01665 ANIA_01668 ANIA_01680 ANIA_01694 ANIA_01800 ANIA_01867 ANIA_01965 ANIA_02180 ANIA_02246 ANIA_02311 ANIA_02363 ANIA_02412 ANIA_02473 ANIA_02513 ANIA_02882 ANIA_03065 ANIA_03169 ANIA_03214 ANI…
1.11654e-05	82	175	1.62447	Cellular nitrogen compound catabolic process	http://amigo.geneontology.org/amigo/term/GO:0044270	ANIA_00232 ANIA_00258 ANIA_00418 ANIA_00434 ANIA_00505 ANIA_00632 ANIA_00646 ANIA_00662 ANIA_00767 ANIA_00891 ANIA_01271 ANIA_01480 ANIA_01498 ANIA_01857 ANIA_01976 ANIA_02065 ANIA_02080 ANIA_02153 ANIA_02248 ANIA_02252 ANIA_02270 ANIA_02271 ANIA_02494 ANIA_02764 ANIA_02938 ANIA_03014 ANIA_03104 ANIA_03411 ANIA_03431 ANIA_03591 ANIA_03656 ANIA_03657 ANIA_03739 ANIA_03812 ANIA_03957 ANIA_04000 ANI…
1.1923e-05	117	268	1.49255	Negative regulation of cellular process	http://amigo.geneontology.org/amigo/term/GO:0048523	ANIA_00038 ANIA_00184 ANIA_00410 ANIA_00439 ANIA_00486 ANIA_00504 ANIA_00556 ANIA_00565 ANIA_00641 ANIA_00671 ANIA_00676 ANIA_00847 ANIA_01132 ANIA_01191 ANIA_01207 ANIA_01272 ANIA_01306 ANIA_01359 ANIA_01400 ANIA_01545 ANIA_01669 ANIA_01708 ANIA_01779 ANIA_01812 ANIA_01867 ANIA_01967 ANIA_01976 ANIA_02021 ANIA_02065 ANIA_02080 ANIA_02126 ANIA_02141 ANIA_02246 ANIA_02270 ANIA_02302 ANIA_02439 ANI…
1.30111e-05	381	1061	1.23141	Anion binding	http://amigo.geneontology.org/amigo/term/GO:0043168	ANIA_00034 ANIA_00038 ANIA_00097 ANIA_00106 ANIA_00114 ANIA_00124 ANIA_00126 ANIA_00127 ANIA_00161 ANIA_00327 ANIA_00330 ANIA_00347 ANIA_00349 ANIA_00381 ANIA_00403 ANIA_00424 ANIA_00449 ANIA_00462 ANIA_00490 ANIA_00502 ANIA_00561 ANIA_00565 ANIA_00576 ANIA_00623 ANIA_00637 ANIA_00646 ANIA_00673 ANIA_00676 ANIA_00699 ANIA_00705 ANIA_00780 ANIA_00797 ANIA_00804 ANIA_00822 ANIA_00836 ANIA_00847 ANI…
1.66334e-05	257	680	1.29376	Phosphate-containing compound metabolic process	http://amigo.geneontology.org/amigo/term/GO:0006796	ANIA_00034 ANIA_00038 ANIA_00103 ANIA_00106 ANIA_00120 ANIA_00124 ANIA_00129 ANIA_00138 ANIA_00156 ANIA_00161 ANIA_00164 ANIA_00193 ANIA_00206 ANIA_00270 ANIA_00410 ANIA_00490 ANIA_00495 ANIA_00504 ANIA_00564 ANIA_00565 ANIA_00576 ANIA_00579 ANIA_00591 ANIA_00605 ANIA_00636 ANIA_00662 ANIA_00699 ANIA_00822 ANIA_00868 ANIA_00893 ANIA_00906 ANIA_00910 ANIA_00918 ANIA_00919 ANIA_00947 ANIA_01171 ANI…
1.69856e-05	278	743	1.27903	Regulation of nucleic acid-templated transcription	http://amigo.geneontology.org/amigo/term/GO:1903506	ANIA_00083 ANIA_00094 ANIA_00096 ANIA_00134 ANIA_00138 ANIA_00148 ANIA_00154 ANIA_00191 ANIA_00197 ANIA_00202 ANIA_00327 ANIA_00388 ANIA_00410 ANIA_00486 ANIA_00507 ANIA_00554 ANIA_00568 ANIA_00671 ANIA_00680 ANIA_00719 ANIA_00807 ANIA_00816 ANIA_00891 ANIA_00902 ANIA_00937 ANIA_01028 ANIA_01052 ANIA_01132 ANIA_01190 ANIA_01205 ANIA_01227 ANIA_01265 ANIA_01272 ANIA_01286 ANIA_01303 ANIA_01369 ANI…
1.69856e-05	278	743	1.27903	Regulation of RNA biosynthetic process	http://amigo.geneontology.org/amigo/term/GO:2001141	ANIA_00083 ANIA_00094 ANIA_00096 ANIA_00134 ANIA_00138 ANIA_00148 ANIA_00154 ANIA_00191 ANIA_00197 ANIA_00202 ANIA_00327 ANIA_00388 ANIA_00410 ANIA_00486 ANIA_00507 ANIA_00554 ANIA_00568 ANIA_00671 ANIA_00680 ANIA_00719 ANIA_00807 ANIA_00816 ANIA_00891 ANIA_00902 ANIA_00937 ANIA_01028 ANIA_01052 ANIA_01132 ANIA_01190 ANIA_01205 ANIA_01227 ANIA_01265 ANIA_01272 ANIA_01286 ANIA_01303 ANIA_01369 ANI…
1.88486e-05	93	204	1.55823	Cytoskeleton	http://amigo.geneontology.org/amigo/term/GO:0005856	ANIA_00108 ANIA_00143 ANIA_00184 ANIA_00306 ANIA_00317 ANIA_00410 ANIA_00605 ANIA_00641 ANIA_00673 ANIA_00676 ANIA_01005 ANIA_01023 ANIA_01056 ANIA_01071 ANIA_01182 ANIA_01191 ANIA_01306 ANIA_01394 ANIA_01398 ANIA_01401 ANIA_01462 ANIA_01545 ANIA_01580 ANIA_01953 ANIA_02126 ANIA_02484 ANIA_02756 ANIA_02759 ANIA_02773 ANIA_02862 ANIA_02886 ANIA_03171 ANIA_03187 ANIA_03547 ANIA_03589 ANIA_03710 ANI…
1.88527e-05	232	604	1.31095	Regulation of transcription by RNA polymerase II	http://amigo.geneontology.org/amigo/term/GO:0006357	ANIA_00083 ANIA_00094 ANIA_00096 ANIA_00138 ANIA_00148 ANIA_00191 ANIA_00197 ANIA_00202 ANIA_00327 ANIA_00388 ANIA_00410 ANIA_00486 ANIA_00507 ANIA_00568 ANIA_00671 ANIA_00680 ANIA_00719 ANIA_00891 ANIA_00902 ANIA_00937 ANIA_01028 ANIA_01132 ANIA_01265 ANIA_01303 ANIA_01369 ANIA_01406 ANIA_01494 ANIA_01584 ANIA_01599 ANIA_01668 ANIA_01669 ANIA_01705 ANIA_01729 ANIA_01812 ANIA_01867 ANIA_01929 ANI…
1.89129e-05	277	741	1.27792	Regulation of transcription, DNA-templated	http://amigo.geneontology.org/amigo/term/GO:0006355	ANIA_00083 ANIA_00094 ANIA_00096 ANIA_00134 ANIA_00138 ANIA_00148 ANIA_00154 ANIA_00191 ANIA_00197 ANIA_00202 ANIA_00327 ANIA_00388 ANIA_00410 ANIA_00486 ANIA_00507 ANIA_00554 ANIA_00568 ANIA_00671 ANIA_00680 ANIA_00719 ANIA_00807 ANIA_00891 ANIA_00902 ANIA_00937 ANIA_01028 ANIA_01052 ANIA_01132 ANIA_01190 ANIA_01205 ANIA_01227 ANIA_01265 ANIA_01272 ANIA_01286 ANIA_01303 ANIA_01369 ANIA_01406 ANI…
1.96792e-05	70	146	1.67196	Catalytic activity, acting on DNA	http://amigo.geneontology.org/amigo/term/GO:0140097	ANIA_00076 ANIA_00083 ANIA_00097 ANIA_00260 ANIA_00327 ANIA_00424 ANIA_00437 ANIA_00556 ANIA_00872 ANIA_01237 ANIA_01479 ANIA_01708 ANIA_02087 ANIA_02139 ANIA_02160 ANIA_02446 ANIA_02491 ANIA_02637 ANIA_02661 ANIA_02764 ANIA_02969 ANIA_03067 ANIA_03118 ANIA_03129 ANIA_03186 ANIA_03373 ANIA_03619 ANIA_03629 ANIA_03749 ANIA_03753 ANIA_03797 ANIA_03940 ANIA_03944 ANIA_03947 ANIA_03958 ANIA_04289 ANI…
2.2008e-05	130	305	1.44493	Phosphorylation	http://amigo.geneontology.org/amigo/term/GO:0016310	ANIA_00034 ANIA_00038 ANIA_00106 ANIA_00124 ANIA_00138 ANIA_00156 ANIA_00161 ANIA_00193 ANIA_00270 ANIA_00576 ANIA_00699 ANIA_00822 ANIA_01171 ANIA_01272 ANIA_01296 ANIA_01326 ANIA_01404 ANIA_01485 ANIA_01568 ANIA_01665 ANIA_01668 ANIA_01680 ANIA_01694 ANIA_01779 ANIA_01800 ANIA_01867 ANIA_01965 ANIA_02172 ANIA_02180 ANIA_02211 ANIA_02246 ANIA_02311 ANIA_02334 ANIA_02363 ANIA_02412 ANIA_02473 ANI…
2.2375e-05	71	147	1.66051	TRNA metabolic process	http://amigo.geneontology.org/amigo/term/GO:0006399	ANIA_00114 ANIA_00128 ANIA_00130 ANIA_00161 ANIA_00189 ANIA_00191 ANIA_00502 ANIA_00504 ANIA_00705 ANIA_00767 ANIA_00804 ANIA_00956 ANIA_01201 ANIA_01296 ANIA_01380 ANIA_01385 ANIA_01401 ANIA_01751 ANIA_01913 ANIA_02105 ANIA_02150 ANIA_02190 ANIA_02252 ANIA_02327 ANIA_02499 ANIA_02513 ANIA_03012 ANIA_03652 ANIA_03657 ANIA_03702 ANIA_03792 ANIA_03824 ANIA_04086 ANIA_04550 ANIA_04786 ANIA_05119 ANI…
2.32348e-05	299	810	1.26187	RNA biosynthetic process	http://amigo.geneontology.org/amigo/term/GO:0032774	ANIA_00083 ANIA_00094 ANIA_00096 ANIA_00134 ANIA_00138 ANIA_00148 ANIA_00154 ANIA_00191 ANIA_00192 ANIA_00197 ANIA_00202 ANIA_00260 ANIA_00321 ANIA_00327 ANIA_00388 ANIA_00410 ANIA_00434 ANIA_00486 ANIA_00507 ANIA_00554 ANIA_00568 ANIA_00671 ANIA_00680 ANIA_00719 ANIA_00807 ANIA_00816 ANIA_00891 ANIA_00902 ANIA_00937 ANIA_01028 ANIA_01052 ANIA_01132 ANIA_01152 ANIA_01190 ANIA_01205 ANIA_01227 ANI…
2.54789e-05	220	569	1.31601	Nuclear protein-containing complex	http://amigo.geneontology.org/amigo/term/GO:0140513	ANIA_00065 ANIA_00083 ANIA_00084 ANIA_00097 ANIA_00126 ANIA_00138 ANIA_00143 ANIA_00154 ANIA_00161 ANIA_00189 ANIA_00191 ANIA_00192 ANIA_00260 ANIA_00321 ANIA_00327 ANIA_00410 ANIA_00421 ANIA_00434 ANIA_00556 ANIA_00576 ANIA_00582 ANIA_00632 ANIA_00668 ANIA_00699 ANIA_00719 ANIA_00767 ANIA_00816 ANIA_00872 ANIA_00905 ANIA_00911 ANIA_00960 ANIA_01152 ANIA_01190 ANIA_01207 ANIA_01208 ANIA_01227 ANI…
2.54789e-05	59	115	1.74298	Chromosome segregation	http://amigo.geneontology.org/amigo/term/GO:0007059	ANIA_00143 ANIA_00410 ANIA_00504 ANIA_00676 ANIA_00848 ANIA_00905 ANIA_00960 ANIA_01182 ANIA_01191 ANIA_01223 ANIA_01286 ANIA_01398 ANIA_01399 ANIA_01545 ANIA_01977 ANIA_02143 ANIA_02160 ANIA_02302 ANIA_02439 ANIA_02886 ANIA_02963 ANIA_03118 ANIA_03123 ANIA_03187 ANIA_03451 ANIA_03579 ANIA_03710 ANIA_03946 ANIA_04085 ANIA_04399 ANIA_04597 ANIA_04735 ANIA_04752 ANIA_04804 ANIA_04961 ANIA_05102 ANI…
2.63821e-05	260	693	1.28391	Phosphorus metabolic process	http://amigo.geneontology.org/amigo/term/GO:0006793	ANIA_00034 ANIA_00038 ANIA_00103 ANIA_00106 ANIA_00120 ANIA_00124 ANIA_00129 ANIA_00138 ANIA_00156 ANIA_00161 ANIA_00164 ANIA_00193 ANIA_00206 ANIA_00270 ANIA_00410 ANIA_00469 ANIA_00490 ANIA_00495 ANIA_00504 ANIA_00564 ANIA_00565 ANIA_00576 ANIA_00579 ANIA_00591 ANIA_00605 ANIA_00636 ANIA_00662 ANIA_00699 ANIA_00743 ANIA_00822 ANIA_00868 ANIA_00893 ANIA_00906 ANIA_00910 ANIA_00918 ANIA_00919 ANI…
2.89427e-05	54	103	1.78295	Posttranscriptional regulation of gene expression	http://amigo.geneontology.org/amigo/term/GO:0010608	ANIA_00119 ANIA_00167 ANIA_00505 ANIA_00720 ANIA_01344 ANIA_01665 ANIA_01976 ANIA_02065 ANIA_02080 ANIA_02246 ANIA_02271 ANIA_02482 ANIA_02775 ANIA_03055 ANIA_03411 ANIA_03739 ANIA_04000 ANIA_04015 ANIA_04085 ANIA_04163 ANIA_04202 ANIA_04285 ANIA_04470 ANIA_04546 ANIA_04790 ANIA_04965 ANIA_05179 ANIA_05408 ANIA_05898 ANIA_06199 ANIA_06283 ANIA_06587 ANIA_06695 ANIA_07492 ANIA_07554 ANIA_07628 ANI…
2.89427e-05	47	85	1.86219	Regulation of mitotic cell cycle	http://amigo.geneontology.org/amigo/term/GO:0007346	ANIA_00410 ANIA_00556 ANIA_00676 ANIA_00872 ANIA_00905 ANIA_01207 ANIA_01545 ANIA_01779 ANIA_02302 ANIA_02439 ANIA_02969 ANIA_03040 ANIA_03118 ANIA_03422 ANIA_03450 ANIA_03619 ANIA_03946 ANIA_04085 ANIA_04182 ANIA_04271 ANIA_04279 ANIA_04385 ANIA_04571 ANIA_04735 ANIA_05406 ANIA_05494 ANIA_05495 ANIA_05674 ANIA_05717 ANIA_05820 ANIA_06078 ANIA_06145 ANIA_06339 ANIA_06616 ANIA_06878 ANIA_07206 ANI…
2.94877e-05	60	118	1.72708	Protein-containing complex binding	http://amigo.geneontology.org/amigo/term/GO:0044877	ANIA_00068 ANIA_00184 ANIA_00306 ANIA_00673 ANIA_00906 ANIA_01056 ANIA_01130 ANIA_01167 ANIA_01237 ANIA_01286 ANIA_01306 ANIA_01708 ANIA_01711 ANIA_02271 ANIA_02304 ANIA_02756 ANIA_02765 ANIA_02775 ANIA_03055 ANIA_03090 ANIA_03096 ANIA_03123 ANIA_03156 ANIA_04015 ANIA_04043 ANIA_04163 ANIA_04168 ANIA_04492 ANIA_04530 ANIA_04571 ANIA_04742 ANIA_04919 ANIA_05102 ANIA_05686 ANIA_05719 ANIA_05778 ANI…
3.59427e-05	166	415	1.37023	DNA-binding transcription factor activity, RNA polymerase II-specific	http://amigo.geneontology.org/amigo/term/GO:0000981	ANIA_00094 ANIA_00096 ANIA_00148 ANIA_00197 ANIA_00202 ANIA_00388 ANIA_00486 ANIA_00507 ANIA_00568 ANIA_00671 ANIA_00680 ANIA_00891 ANIA_00902 ANIA_00937 ANIA_01028 ANIA_01265 ANIA_01303 ANIA_01406 ANIA_01584 ANIA_01599 ANIA_01705 ANIA_01729 ANIA_01812 ANIA_02001 ANIA_02270 ANIA_02324 ANIA_02650 ANIA_02652 ANIA_02725 ANIA_02763 ANIA_02782 ANIA_02826 ANIA_03050 ANIA_03075 ANIA_03120 ANIA_03217 ANI…
3.96074e-05	24	34	2.37727	Replication fork	http://amigo.geneontology.org/amigo/term/GO:0005657	ANIA_00260 ANIA_00582 ANIA_00872 ANIA_01208 ANIA_02446 ANIA_02491 ANIA_02969 ANIA_03033 ANIA_03940 ANIA_05102 ANIA_05901 ANIA_06300 ANIA_06517 ANIA_06687 ANIA_06728 ANIA_06827 ANIA_07308 ANIA_07325 ANIA_07423 ANIA_08064 ANIA_10145 ANIA_10470 ANIA_10635 ANIA_10755
4.4688e-05	92	202	1.53385	Peptidyl-amino acid modification	http://amigo.geneontology.org/amigo/term/GO:0018193	ANIA_00065 ANIA_00083 ANIA_00106 ANIA_00121 ANIA_00134 ANIA_00191 ANIA_00327 ANIA_00668 ANIA_00690 ANIA_00719 ANIA_00720 ANIA_00906 ANIA_01191 ANIA_01272 ANIA_01328 ANIA_01485 ANIA_01706 ANIA_01782 ANIA_01800 ANIA_01905 ANIA_01907 ANIA_01976 ANIA_02298 ANIA_02363 ANIA_02412 ANIA_02450 ANIA_02745 ANIA_02769 ANIA_03065 ANIA_03096 ANIA_03214 ANIA_03450 ANIA_03628 ANIA_03839 ANIA_03905 ANIA_04069 ANI…
5.99391e-05	166	417	1.36023	Positive regulation of cellular metabolic process	http://amigo.geneontology.org/amigo/term/GO:0031325	ANIA_00106 ANIA_00148 ANIA_00202 ANIA_00256 ANIA_00388 ANIA_00410 ANIA_00439 ANIA_00486 ANIA_00504 ANIA_00505 ANIA_00554 ANIA_00568 ANIA_00671 ANIA_00807 ANIA_00891 ANIA_00910 ANIA_00911 ANIA_01167 ANIA_01227 ANIA_01303 ANIA_01369 ANIA_01406 ANIA_01494 ANIA_01545 ANIA_01584 ANIA_01668 ANIA_01779 ANIA_01812 ANIA_01867 ANIA_02065 ANIA_02080 ANIA_02172 ANIA_02211 ANIA_02270 ANIA_02845 ANIA_03050 ANI…
6.25781e-05	239	634	1.28579	Transcription by RNA polymerase II	http://amigo.geneontology.org/amigo/term/GO:0006366	ANIA_00083 ANIA_00094 ANIA_00096 ANIA_00138 ANIA_00148 ANIA_00191 ANIA_00192 ANIA_00197 ANIA_00202 ANIA_00327 ANIA_00388 ANIA_00410 ANIA_00434 ANIA_00486 ANIA_00507 ANIA_00568 ANIA_00671 ANIA_00680 ANIA_00719 ANIA_00816 ANIA_00891 ANIA_00902 ANIA_00937 ANIA_01028 ANIA_01132 ANIA_01265 ANIA_01303 ANIA_01369 ANIA_01406 ANIA_01494 ANIA_01584 ANIA_01599 ANIA_01668 ANIA_01669 ANIA_01705 ANIA_01729 ANI…
6.25781e-05	169	426	1.35514	Positive regulation of metabolic process	http://amigo.geneontology.org/amigo/term/GO:0009893	ANIA_00106 ANIA_00148 ANIA_00202 ANIA_00256 ANIA_00388 ANIA_00410 ANIA_00439 ANIA_00486 ANIA_00504 ANIA_00505 ANIA_00554 ANIA_00568 ANIA_00671 ANIA_00807 ANIA_00891 ANIA_00910 ANIA_00911 ANIA_01167 ANIA_01227 ANIA_01303 ANIA_01369 ANIA_01406 ANIA_01494 ANIA_01545 ANIA_01584 ANIA_01668 ANIA_01779 ANIA_01812 ANIA_01867 ANIA_02065 ANIA_02080 ANIA_02172 ANIA_02211 ANIA_02270 ANIA_02845 ANIA_03050 ANI…
6.59629e-05	47	87	1.81938	Sister chromatid segregation	http://amigo.geneontology.org/amigo/term/GO:0000819	ANIA_00143 ANIA_00410 ANIA_00504 ANIA_00676 ANIA_00848 ANIA_00905 ANIA_00960 ANIA_01182 ANIA_01191 ANIA_01223 ANIA_01286 ANIA_01398 ANIA_01545 ANIA_02143 ANIA_02160 ANIA_02302 ANIA_02439 ANIA_02963 ANIA_03187 ANIA_03451 ANIA_03579 ANIA_03710 ANIA_03946 ANIA_04085 ANIA_04399 ANIA_04597 ANIA_04735 ANIA_04804 ANIA_04961 ANIA_05102 ANIA_05406 ANIA_05495 ANIA_05899 ANIA_06517 ANIA_07048 ANIA_07296 ANI…
6.87891e-05	39	68	1.93153	Negative regulation of cell cycle process	http://amigo.geneontology.org/amigo/term/GO:0010948	ANIA_00038 ANIA_00410 ANIA_00504 ANIA_00556 ANIA_00676 ANIA_01207 ANIA_01359 ANIA_01545 ANIA_01779 ANIA_01967 ANIA_02246 ANIA_02302 ANIA_02439 ANIA_02969 ANIA_03040 ANIA_03118 ANIA_03450 ANIA_03619 ANIA_03737 ANIA_03946 ANIA_04085 ANIA_04279 ANIA_04571 ANIA_05406 ANIA_05494 ANIA_05666 ANIA_06578 ANIA_06616 ANIA_06749 ANIA_06878 ANIA_06975 ANIA_07423 ANIA_07563 ANIA_08876 ANIA_09413 ANIA_09435 ANI…
7.38717e-05	294	805	1.24859	Nucleic acid-templated transcription	http://amigo.geneontology.org/amigo/term/GO:0097659	ANIA_00083 ANIA_00094 ANIA_00096 ANIA_00134 ANIA_00138 ANIA_00148 ANIA_00154 ANIA_00191 ANIA_00192 ANIA_00197 ANIA_00202 ANIA_00321 ANIA_00327 ANIA_00388 ANIA_00410 ANIA_00434 ANIA_00486 ANIA_00507 ANIA_00554 ANIA_00568 ANIA_00671 ANIA_00680 ANIA_00719 ANIA_00807 ANIA_00816 ANIA_00891 ANIA_00902 ANIA_00937 ANIA_01028 ANIA_01052 ANIA_01132 ANIA_01152 ANIA_01190 ANIA_01205 ANIA_01227 ANIA_01265 ANI…
7.42193e-05	171	430	1.3487	Cell communication	http://amigo.geneontology.org/amigo/term/GO:0007154	ANIA_00038 ANIA_00106 ANIA_00120 ANIA_00163 ANIA_00241 ANIA_00388 ANIA_00410 ANIA_00439 ANIA_00449 ANIA_00504 ANIA_00554 ANIA_00556 ANIA_00568 ANIA_00575 ANIA_00671 ANIA_00676 ANIA_00822 ANIA_00847 ANIA_00953 ANIA_01025 ANIA_01171 ANIA_01207 ANIA_01406 ANIA_01545 ANIA_01661 ANIA_01733 ANIA_01800 ANIA_01812 ANIA_01867 ANIA_02130 ANIA_02180 ANIA_02222 ANIA_02246 ANIA_02363 ANIA_02412 ANIA_02439 ANI…
7.53194e-05	93	208	1.51307	Phosphotransferase activity, alcohol group as acceptor	http://amigo.geneontology.org/amigo/term/GO:0016773	ANIA_00034 ANIA_00038 ANIA_00106 ANIA_00124 ANIA_00156 ANIA_00161 ANIA_00270 ANIA_00576 ANIA_00699 ANIA_00822 ANIA_01171 ANIA_01296 ANIA_01326 ANIA_01404 ANIA_01485 ANIA_01568 ANIA_01665 ANIA_01680 ANIA_01694 ANIA_01800 ANIA_01867 ANIA_02180 ANIA_02246 ANIA_02363 ANIA_02412 ANIA_02473 ANIA_02513 ANIA_03065 ANIA_03214 ANIA_03422 ANIA_03450 ANIA_03499 ANIA_03719 ANIA_03916 ANIA_03946 ANIA_04182 ANI…
7.53194e-05	140	346	1.39495	Sequence-specific DNA binding	http://amigo.geneontology.org/amigo/term/GO:0043565	ANIA_00094 ANIA_00148 ANIA_00197 ANIA_00388 ANIA_00486 ANIA_00568 ANIA_00671 ANIA_00680 ANIA_00872 ANIA_00891 ANIA_00937 ANIA_01028 ANIA_01152 ANIA_01207 ANIA_01259 ANIA_01265 ANIA_01391 ANIA_01435 ANIA_01494 ANIA_01584 ANIA_01599 ANIA_01812 ANIA_01905 ANIA_01906 ANIA_01929 ANIA_02141 ANIA_02270 ANIA_02271 ANIA_02324 ANIA_02417 ANIA_02491 ANIA_02650 ANIA_02652 ANIA_02826 ANIA_02955 ANIA_03040 ANI…
8.12451e-05	293	803	1.24749	Transcription, DNA-templated	http://amigo.geneontology.org/amigo/term/GO:0006351	ANIA_00083 ANIA_00094 ANIA_00096 ANIA_00134 ANIA_00138 ANIA_00148 ANIA_00154 ANIA_00191 ANIA_00192 ANIA_00197 ANIA_00202 ANIA_00321 ANIA_00327 ANIA_00388 ANIA_00410 ANIA_00434 ANIA_00486 ANIA_00507 ANIA_00554 ANIA_00568 ANIA_00671 ANIA_00680 ANIA_00719 ANIA_00807 ANIA_00816 ANIA_00891 ANIA_00902 ANIA_00937 ANIA_01028 ANIA_01052 ANIA_01132 ANIA_01152 ANIA_01190 ANIA_01205 ANIA_01227 ANIA_01265 ANI…
8.32442e-05	446	1281	1.18926	Cation binding	http://amigo.geneontology.org/amigo/term/GO:0043169	ANIA_00042 ANIA_00051 ANIA_00077 ANIA_00094 ANIA_00096 ANIA_00097 ANIA_00106 ANIA_00131 ANIA_00148 ANIA_00158 ANIA_00197 ANIA_00202 ANIA_00224 ANIA_00232 ANIA_00241 ANIA_00258 ANIA_00260 ANIA_00261 ANIA_00317 ANIA_00321 ANIA_00338 ANIA_00388 ANIA_00410 ANIA_00443 ANIA_00459 ANIA_00486 ANIA_00502 ANIA_00507 ANIA_00551 ANIA_00556 ANIA_00565 ANIA_00568 ANIA_00641 ANIA_00646 ANIA_00667 ANIA_00680 ANI…
8.93889e-05	40	71	1.89735	Negative regulation of cell cycle	http://amigo.geneontology.org/amigo/term/GO:0045786	ANIA_00038 ANIA_00410 ANIA_00504 ANIA_00556 ANIA_00676 ANIA_01207 ANIA_01359 ANIA_01545 ANIA_01779 ANIA_01967 ANIA_02246 ANIA_02302 ANIA_02439 ANIA_02969 ANIA_03040 ANIA_03118 ANIA_03450 ANIA_03619 ANIA_03737 ANIA_03946 ANIA_04085 ANIA_04271 ANIA_04279 ANIA_04571 ANIA_05406 ANIA_05494 ANIA_05666 ANIA_06578 ANIA_06616 ANIA_06749 ANIA_06878 ANIA_06975 ANIA_07423 ANIA_07563 ANIA_08876 ANIA_09413 ANI…
9.35704e-05	214	562	1.29857	Cellular localization	http://amigo.geneontology.org/amigo/term/GO:0051641	ANIA_00068 ANIA_00084 ANIA_00095 ANIA_00124 ANIA_00127 ANIA_00143 ANIA_00165 ANIA_00244 ANIA_00255 ANIA_00261 ANIA_00317 ANIA_00410 ANIA_00434 ANIA_00462 ANIA_00576 ANIA_00632 ANIA_00673 ANIA_00706 ANIA_00848 ANIA_00878 ANIA_00901 ANIA_00906 ANIA_00960 ANIA_01002 ANIA_01023 ANIA_01038 ANIA_01056 ANIA_01076 ANIA_01177 ANIA_01182 ANIA_01190 ANIA_01223 ANIA_01238 ANIA_01272 ANIA_01283 ANIA_01293 ANI…
0.000106833	156	392	1.36108	Positive regulation of nitrogen compound metabolic process	http://amigo.geneontology.org/amigo/term/GO:0051173	ANIA_00106 ANIA_00148 ANIA_00202 ANIA_00256 ANIA_00388 ANIA_00410 ANIA_00486 ANIA_00504 ANIA_00505 ANIA_00554 ANIA_00568 ANIA_00671 ANIA_00807 ANIA_00891 ANIA_00910 ANIA_00911 ANIA_01167 ANIA_01227 ANIA_01303 ANIA_01369 ANIA_01406 ANIA_01494 ANIA_01545 ANIA_01584 ANIA_01668 ANIA_01779 ANIA_01812 ANIA_02065 ANIA_02080 ANIA_02172 ANIA_02211 ANIA_02270 ANIA_02845 ANIA_03050 ANIA_03075 ANIA_03095 ANI…
0.000138741	88	198	1.51207	Regulation of molecular function	http://amigo.geneontology.org/amigo/term/GO:0065009	ANIA_00084 ANIA_00108 ANIA_00163 ANIA_00261 ANIA_00504 ANIA_00911 ANIA_01025 ANIA_01038 ANIA_01167 ANIA_01248 ANIA_01272 ANIA_01344 ANIA_01400 ANIA_01535 ANIA_01545 ANIA_01629 ANIA_01661 ANIA_01668 ANIA_01669 ANIA_01779 ANIA_01867 ANIA_01931 ANIA_01980 ANIA_02081 ANIA_02141 ANIA_02172 ANIA_02211 ANIA_02222 ANIA_02491 ANIA_02514 ANIA_02520 ANIA_02878 ANIA_03095 ANIA_03422 ANIA_03450 ANIA_03625 ANI…
0.000141497	49	96	1.75555	DNA recombination	http://amigo.geneontology.org/amigo/term/GO:0006310	ANIA_00097 ANIA_00556 ANIA_00582 ANIA_00872 ANIA_01237 ANIA_01708 ANIA_01843 ANIA_02087 ANIA_02302 ANIA_02491 ANIA_02765 ANIA_03040 ANIA_03118 ANIA_03450 ANIA_03546 ANIA_03619 ANIA_03797 ANIA_03940 ANIA_04331 ANIA_04432 ANIA_04519 ANIA_04552 ANIA_04752 ANIA_04789 ANIA_05092 ANIA_05278 ANIA_05406 ANIA_05901 ANIA_05992 ANIA_06069 ANIA_06261 ANIA_06569 ANIA_06616 ANIA_06636 ANIA_06728 ANIA_06827 ANI…
0.000142311	114	276	1.43257	Double-stranded DNA binding	http://amigo.geneontology.org/amigo/term/GO:0003690	ANIA_00126 ANIA_00148 ANIA_00388 ANIA_00434 ANIA_00568 ANIA_00671 ANIA_00680 ANIA_00872 ANIA_01028 ANIA_01152 ANIA_01207 ANIA_01237 ANIA_01259 ANIA_01265 ANIA_01391 ANIA_01435 ANIA_01479 ANIA_01494 ANIA_01584 ANIA_01599 ANIA_01708 ANIA_01729 ANIA_01812 ANIA_01843 ANIA_01905 ANIA_01929 ANIA_02139 ANIA_02270 ANIA_02491 ANIA_02652 ANIA_02765 ANIA_02826 ANIA_02955 ANIA_03040 ANIA_03050 ANIA_03075 ANI…
0.00014911	12	13	3.10874	Replisome	http://amigo.geneontology.org/amigo/term/GO:0030894	ANIA_00260 ANIA_00582 ANIA_01208 ANIA_02446 ANIA_03033 ANIA_06687 ANIA_06827 ANIA_07308 ANIA_07325 ANIA_07423 ANIA_10470 ANIA_10755
0.00014911	12	13	3.10874	Nuclear replisome	http://amigo.geneontology.org/amigo/term/GO:0043601	ANIA_00260 ANIA_00582 ANIA_01208 ANIA_02446 ANIA_03033 ANIA_06687 ANIA_06827 ANIA_07308 ANIA_07325 ANIA_07423 ANIA_10470 ANIA_10755
0.00014911	408	1169	1.1938	Transferase activity	http://amigo.geneontology.org/amigo/term/GO:0016740	ANIA_00034 ANIA_00038 ANIA_00065 ANIA_00086 ANIA_00106 ANIA_00121 ANIA_00124 ANIA_00128 ANIA_00130 ANIA_00134 ANIA_00150 ANIA_00156 ANIA_00161 ANIA_00192 ANIA_00193 ANIA_00206 ANIA_00260 ANIA_00270 ANIA_00321 ANIA_00385 ANIA_00482 ANIA_00487 ANIA_00495 ANIA_00558 ANIA_00565 ANIA_00576 ANIA_00591 ANIA_00636 ANIA_00648 ANIA_00685 ANIA_00687 ANIA_00690 ANIA_00699 ANIA_00720 ANIA_00743 ANIA_00780 ANI…
0.00016335	440	1270	1.18357	Metal ion binding	http://amigo.geneontology.org/amigo/term/GO:0046872	ANIA_00042 ANIA_00051 ANIA_00077 ANIA_00094 ANIA_00096 ANIA_00097 ANIA_00106 ANIA_00131 ANIA_00148 ANIA_00158 ANIA_00197 ANIA_00202 ANIA_00224 ANIA_00232 ANIA_00241 ANIA_00258 ANIA_00260 ANIA_00261 ANIA_00317 ANIA_00321 ANIA_00338 ANIA_00388 ANIA_00410 ANIA_00443 ANIA_00459 ANIA_00486 ANIA_00502 ANIA_00507 ANIA_00551 ANIA_00556 ANIA_00565 ANIA_00568 ANIA_00641 ANIA_00646 ANIA_00667 ANIA_00680 ANI…
0.000164516	50	98	1.73598	Regulation of cellular amide metabolic process	http://amigo.geneontology.org/amigo/term/GO:0034248	ANIA_00106 ANIA_00167 ANIA_00256 ANIA_00504 ANIA_00505 ANIA_00720 ANIA_00807 ANIA_01344 ANIA_01665 ANIA_02065 ANIA_02080 ANIA_02246 ANIA_02270 ANIA_02482 ANIA_02775 ANIA_03055 ANIA_03411 ANIA_03719 ANIA_04000 ANIA_04015 ANIA_04085 ANIA_04163 ANIA_04202 ANIA_04351 ANIA_04470 ANIA_04965 ANIA_05179 ANIA_05898 ANIA_06199 ANIA_06283 ANIA_06587 ANIA_07492 ANIA_07554 ANIA_07628 ANIA_07746 ANIA_08173 ANI…
0.000172203	29	48	2.078	Recombinational repair	http://amigo.geneontology.org/amigo/term/GO:0000725	ANIA_00556 ANIA_00582 ANIA_00872 ANIA_01237 ANIA_02087 ANIA_02491 ANIA_03040 ANIA_03118 ANIA_03450 ANIA_03619 ANIA_03797 ANIA_03940 ANIA_04432 ANIA_04789 ANIA_05092 ANIA_05901 ANIA_05992 ANIA_06261 ANIA_06616 ANIA_06728 ANIA_06827 ANIA_07423 ANIA_07499 ANIA_08742 ANIA_10145 ANIA_10240 ANIA_10415 ANIA_10497 ANIA_10763
0.000172475	41	75	1.84106	Regulation of cell cycle phase transition	http://amigo.geneontology.org/amigo/term/GO:1901987	ANIA_00038 ANIA_00410 ANIA_00556 ANIA_00676 ANIA_00872 ANIA_00905 ANIA_01207 ANIA_01545 ANIA_01779 ANIA_02246 ANIA_02302 ANIA_02439 ANIA_02969 ANIA_03040 ANIA_03118 ANIA_03450 ANIA_03619 ANIA_03737 ANIA_03946 ANIA_04085 ANIA_04182 ANIA_04279 ANIA_04571 ANIA_04735 ANIA_05406 ANIA_05494 ANIA_05495 ANIA_05717 ANIA_05820 ANIA_06078 ANIA_06616 ANIA_06878 ANIA_06975 ANIA_07206 ANIA_07563 ANIA_08013 ANI…
0.000192484	18	24	2.52585	Nuclear replication fork	http://amigo.geneontology.org/amigo/term/GO:0043596	ANIA_00260 ANIA_00582 ANIA_00872 ANIA_01208 ANIA_02446 ANIA_02491 ANIA_03033 ANIA_03940 ANIA_05102 ANIA_05901 ANIA_06687 ANIA_06827 ANIA_07308 ANIA_07325 ANIA_07423 ANIA_10470 ANIA_10635 ANIA_10755
0.000193947	28	46	2.09552	Double-strand break repair via homologous recombination	http://amigo.geneontology.org/amigo/term/GO:0000724	ANIA_00556 ANIA_00582 ANIA_00872 ANIA_01237 ANIA_02087 ANIA_02491 ANIA_03040 ANIA_03118 ANIA_03450 ANIA_03619 ANIA_03940 ANIA_04432 ANIA_04789 ANIA_05092 ANIA_05901 ANIA_05992 ANIA_06261 ANIA_06616 ANIA_06728 ANIA_06827 ANIA_07423 ANIA_07499 ANIA_08742 ANIA_10145 ANIA_10240 ANIA_10415 ANIA_10497 ANIA_10763
0.000211843	292	809	1.23387	Cellular catabolic process	http://amigo.geneontology.org/amigo/term/GO:0044248	ANIA_00034 ANIA_00084 ANIA_00127 ANIA_00232 ANIA_00258 ANIA_00405 ANIA_00418 ANIA_00434 ANIA_00439 ANIA_00472 ANIA_00505 ANIA_00551 ANIA_00554 ANIA_00576 ANIA_00593 ANIA_00596 ANIA_00632 ANIA_00646 ANIA_00662 ANIA_00712 ANIA_00763 ANIA_00767 ANIA_00774 ANIA_00810 ANIA_00868 ANIA_00883 ANIA_00891 ANIA_00905 ANIA_00911 ANIA_00941 ANIA_00953 ANIA_01015 ANIA_01132 ANIA_01135 ANIA_01137 ANIA_01167 ANI…
0.00021484	61	127	1.63044	Regulation of organelle organization	http://amigo.geneontology.org/amigo/term/GO:0033043	ANIA_00184 ANIA_00306 ANIA_00410 ANIA_00439 ANIA_00504 ANIA_00673 ANIA_00905 ANIA_00910 ANIA_01191 ANIA_01306 ANIA_01325 ANIA_01398 ANIA_01545 ANIA_01980 ANIA_02126 ANIA_02141 ANIA_02302 ANIA_02439 ANIA_02484 ANIA_02491 ANIA_02862 ANIA_03065 ANIA_03067 ANIA_03171 ANIA_03946 ANIA_04085 ANIA_04167 ANIA_04399 ANIA_04537 ANIA_04735 ANIA_04919 ANIA_04998 ANIA_05102 ANIA_05494 ANIA_05495 ANIA_05521 ANI…
0.00021484	177	461	1.31881	DNA-binding transcription factor activity	http://amigo.geneontology.org/amigo/term/GO:0003700	ANIA_00094 ANIA_00096 ANIA_00148 ANIA_00197 ANIA_00202 ANIA_00388 ANIA_00486 ANIA_00507 ANIA_00568 ANIA_00671 ANIA_00680 ANIA_00891 ANIA_00902 ANIA_00937 ANIA_01028 ANIA_01265 ANIA_01303 ANIA_01406 ANIA_01584 ANIA_01599 ANIA_01686 ANIA_01705 ANIA_01729 ANIA_01812 ANIA_02001 ANIA_02270 ANIA_02324 ANIA_02650 ANIA_02652 ANIA_02725 ANIA_02763 ANIA_02782 ANIA_02826 ANIA_03050 ANIA_03075 ANIA_03120 ANI…
0.000216495	154	391	1.34712	Positive regulation of macromolecule metabolic process	http://amigo.geneontology.org/amigo/term/GO:0010604	ANIA_00148 ANIA_00202 ANIA_00388 ANIA_00410 ANIA_00486 ANIA_00505 ANIA_00554 ANIA_00568 ANIA_00671 ANIA_00891 ANIA_00910 ANIA_00911 ANIA_01167 ANIA_01227 ANIA_01303 ANIA_01369 ANIA_01406 ANIA_01494 ANIA_01545 ANIA_01584 ANIA_01668 ANIA_01779 ANIA_01812 ANIA_02065 ANIA_02080 ANIA_02172 ANIA_02211 ANIA_02270 ANIA_02845 ANIA_03050 ANIA_03075 ANIA_03095 ANIA_03154 ANIA_03217 ANIA_03269 ANIA_03280 ANI…
0.000216495	31	52	2.00772	Negative regulation of cell cycle phase transition	http://amigo.geneontology.org/amigo/term/GO:1901988	ANIA_00038 ANIA_00410 ANIA_00556 ANIA_00676 ANIA_01207 ANIA_01545 ANIA_01779 ANIA_02246 ANIA_02302 ANIA_02439 ANIA_02969 ANIA_03040 ANIA_03118 ANIA_03450 ANIA_03619 ANIA_03737 ANIA_03946 ANIA_04085 ANIA_04279 ANIA_04571 ANIA_05406 ANIA_05494 ANIA_06616 ANIA_06878 ANIA_06975 ANIA_07563 ANIA_08876 ANIA_09413 ANIA_09435 ANIA_09467 ANIA_10434
0.000223356	50	99	1.71826	Nuclear chromosome segregation	http://amigo.geneontology.org/amigo/term/GO:0098813	ANIA_00143 ANIA_00410 ANIA_00504 ANIA_00676 ANIA_00848 ANIA_00905 ANIA_00960 ANIA_01182 ANIA_01191 ANIA_01223 ANIA_01286 ANIA_01398 ANIA_01545 ANIA_02143 ANIA_02160 ANIA_02302 ANIA_02439 ANIA_02963 ANIA_03118 ANIA_03187 ANIA_03451 ANIA_03579 ANIA_03710 ANIA_03946 ANIA_04085 ANIA_04399 ANIA_04597 ANIA_04735 ANIA_04752 ANIA_04804 ANIA_04961 ANIA_05102 ANIA_05406 ANIA_05495 ANIA_05899 ANIA_06517 ANI…
0.000223601	48	93	1.73822	Chromosomal region	http://amigo.geneontology.org/amigo/term/GO:0098687	ANIA_00038 ANIA_00143 ANIA_00166 ANIA_00556 ANIA_00582 ANIA_00960 ANIA_01056 ANIA_01237 ANIA_01286 ANIA_01398 ANIA_01399 ANIA_01401 ANIA_01432 ANIA_01660 ANIA_01905 ANIA_01906 ANIA_01977 ANIA_02141 ANIA_02160 ANIA_02439 ANIA_02513 ANIA_02886 ANIA_03067 ANIA_03158 ANIA_03187 ANIA_03451 ANIA_03710 ANIA_03753 ANIA_04552 ANIA_04797 ANIA_04804 ANIA_04961 ANIA_05521 ANIA_06175 ANIA_06214 ANIA_06224 ANI…
0.00023066	73	163	1.55601	Heterocycle catabolic process	http://amigo.geneontology.org/amigo/term/GO:0046700	ANIA_00258 ANIA_00434 ANIA_00505 ANIA_00632 ANIA_00646 ANIA_00662 ANIA_00767 ANIA_00891 ANIA_01271 ANIA_01480 ANIA_01498 ANIA_01857 ANIA_01976 ANIA_02065 ANIA_02080 ANIA_02153 ANIA_02252 ANIA_02271 ANIA_02494 ANIA_02764 ANIA_02938 ANIA_03014 ANIA_03104 ANIA_03411 ANIA_03431 ANIA_03591 ANIA_03657 ANIA_03739 ANIA_03812 ANIA_04000 ANIA_04425 ANIA_04530 ANIA_04546 ANIA_04958 ANIA_04965 ANIA_05060 ANI…
0.000232176	287	792	1.23443	Organelle organization	http://amigo.geneontology.org/amigo/term/GO:0006996	ANIA_00038 ANIA_00083 ANIA_00084 ANIA_00108 ANIA_00127 ANIA_00143 ANIA_00184 ANIA_00244 ANIA_00261 ANIA_00306 ANIA_00327 ANIA_00405 ANIA_00410 ANIA_00414 ANIA_00421 ANIA_00424 ANIA_00434 ANIA_00437 ANIA_00439 ANIA_00504 ANIA_00556 ANIA_00594 ANIA_00605 ANIA_00673 ANIA_00676 ANIA_00706 ANIA_00719 ANIA_00763 ANIA_00848 ANIA_00905 ANIA_00906 ANIA_00910 ANIA_00960 ANIA_01005 ANIA_01023 ANIA_01055 ANI…
0.000249949	308	856	1.22321	Non-membrane-bounded organelle	http://amigo.geneontology.org/amigo/term/GO:0043228	ANIA_00038 ANIA_00083 ANIA_00108 ANIA_00126 ANIA_00143 ANIA_00166 ANIA_00184 ANIA_00189 ANIA_00192 ANIA_00237 ANIA_00260 ANIA_00278 ANIA_00306 ANIA_00317 ANIA_00327 ANIA_00410 ANIA_00421 ANIA_00475 ANIA_00505 ANIA_00556 ANIA_00582 ANIA_00605 ANIA_00637 ANIA_00641 ANIA_00659 ANIA_00673 ANIA_00676 ANIA_00850 ANIA_00872 ANIA_00907 ANIA_00960 ANIA_01005 ANIA_01023 ANIA_01055 ANIA_01056 ANIA_01071 ANI…
0.000249949	308	856	1.22321	Intracellular non-membrane-bounded organelle	http://amigo.geneontology.org/amigo/term/GO:0043232	ANIA_00038 ANIA_00083 ANIA_00108 ANIA_00126 ANIA_00143 ANIA_00166 ANIA_00184 ANIA_00189 ANIA_00192 ANIA_00237 ANIA_00260 ANIA_00278 ANIA_00306 ANIA_00317 ANIA_00327 ANIA_00410 ANIA_00421 ANIA_00475 ANIA_00505 ANIA_00556 ANIA_00582 ANIA_00605 ANIA_00637 ANIA_00641 ANIA_00659 ANIA_00673 ANIA_00676 ANIA_00850 ANIA_00872 ANIA_00907 ANIA_00960 ANIA_01005 ANIA_01023 ANIA_01055 ANIA_01056 ANIA_01071 ANI…
0.000253739	81	181	1.51551	Protein phosphorylation	http://amigo.geneontology.org/amigo/term/GO:0006468	ANIA_00038 ANIA_00106 ANIA_00124 ANIA_00138 ANIA_00576 ANIA_00699 ANIA_00822 ANIA_01171 ANIA_01272 ANIA_01326 ANIA_01485 ANIA_01665 ANIA_01668 ANIA_01779 ANIA_01800 ANIA_01867 ANIA_02172 ANIA_02211 ANIA_02246 ANIA_02363 ANIA_02412 ANIA_02513 ANIA_03065 ANIA_03095 ANIA_03214 ANIA_03422 ANIA_03450 ANIA_03719 ANIA_03946 ANIA_04066 ANIA_04163 ANIA_04182 ANIA_04196 ANIA_04279 ANIA_04322 ANIA_04385 ANI…
0.000258475	49	96	1.71898	Cell cycle phase transition	http://amigo.geneontology.org/amigo/term/GO:0044770	ANIA_00038 ANIA_00084 ANIA_00410 ANIA_00504 ANIA_00556 ANIA_00676 ANIA_00872 ANIA_00905 ANIA_01207 ANIA_01545 ANIA_01779 ANIA_01867 ANIA_02246 ANIA_02302 ANIA_02412 ANIA_02439 ANIA_02969 ANIA_03040 ANIA_03118 ANIA_03154 ANIA_03450 ANIA_03619 ANIA_03737 ANIA_03946 ANIA_04085 ANIA_04182 ANIA_04271 ANIA_04279 ANIA_04571 ANIA_04735 ANIA_05406 ANIA_05494 ANIA_05495 ANIA_05717 ANIA_05820 ANIA_06078 ANI…
0.000277384	29	48	2.03471	Cell cycle checkpoint signaling	http://amigo.geneontology.org/amigo/term/GO:0000075	ANIA_00038 ANIA_00410 ANIA_00556 ANIA_00676 ANIA_01207 ANIA_01545 ANIA_02246 ANIA_02439 ANIA_02969 ANIA_03040 ANIA_03118 ANIA_03450 ANIA_03619 ANIA_03737 ANIA_03946 ANIA_04085 ANIA_04279 ANIA_04571 ANIA_05406 ANIA_05494 ANIA_06616 ANIA_06878 ANIA_06975 ANIA_07563 ANIA_08876 ANIA_09413 ANIA_09435 ANIA_09467 ANIA_10434
0.000321032	28	46	2.04996	Endopeptidase complex	http://amigo.geneontology.org/amigo/term/GO:1905369	ANIA_01167 ANIA_01757 ANIA_01775 ANIA_02085 ANIA_03493 ANIA_03716 ANIA_03756 ANIA_03826 ANIA_03932 ANIA_04236 ANIA_04449 ANIA_04457 ANIA_04492 ANIA_04731 ANIA_04775 ANIA_04869 ANIA_05121 ANIA_05774 ANIA_05793 ANIA_05872 ANIA_06547 ANIA_06726 ANIA_07579 ANIA_08054 ANIA_10020 ANIA_10439 ANIA_10519 ANIA_10639
0.000379532	21	31	2.28141	Telomere maintenance	http://amigo.geneontology.org/amigo/term/GO:0000723	ANIA_00038 ANIA_00437 ANIA_00556 ANIA_01191 ANIA_01237 ANIA_01660 ANIA_01906 ANIA_02141 ANIA_02271 ANIA_02417 ANIA_03619 ANIA_03753 ANIA_04552 ANIA_04797 ANIA_05278 ANIA_06569 ANIA_06616 ANIA_06975 ANIA_07423 ANIA_07714 ANIA_07753
0.000379532	21	31	2.28141	DNA integrity checkpoint signaling	http://amigo.geneontology.org/amigo/term/GO:0031570	ANIA_00038 ANIA_00410 ANIA_00556 ANIA_01207 ANIA_02246 ANIA_02969 ANIA_03040 ANIA_03118 ANIA_03450 ANIA_03619 ANIA_03737 ANIA_04279 ANIA_04571 ANIA_05406 ANIA_05494 ANIA_06616 ANIA_06878 ANIA_06975 ANIA_07563 ANIA_08876 ANIA_10434
0.000379532	21	31	2.28141	Telomere organization	http://amigo.geneontology.org/amigo/term/GO:0032200	ANIA_00038 ANIA_00437 ANIA_00556 ANIA_01191 ANIA_01237 ANIA_01660 ANIA_01906 ANIA_02141 ANIA_02271 ANIA_02417 ANIA_03619 ANIA_03753 ANIA_04552 ANIA_04797 ANIA_05278 ANIA_06569 ANIA_06616 ANIA_06975 ANIA_07423 ANIA_07714 ANIA_07753
0.000386812	54	111	1.65328	Endosome	http://amigo.geneontology.org/amigo/term/GO:0005768	ANIA_00127 ANIA_00244 ANIA_00255 ANIA_00256 ANIA_00317 ANIA_00347 ANIA_00576 ANIA_01023 ANIA_01038 ANIA_01248 ANIA_01293 ANIA_01462 ANIA_01638 ANIA_02066 ANIA_02093 ANIA_02094 ANIA_02288 ANIA_02418 ANIA_02521 ANIA_02736 ANIA_03015 ANIA_03100 ANIA_03144 ANIA_03188 ANIA_03584 ANIA_03594 ANIA_03821 ANIA_04270 ANIA_04274 ANIA_04351 ANIA_04709 ANIA_05378 ANIA_05632 ANIA_05739 ANIA_06107 ANIA_06311 ANI…
0.000417154	26	42	2.08483	Protein localization to nucleus	http://amigo.geneontology.org/amigo/term/GO:0034504	ANIA_00084 ANIA_00906 ANIA_01190 ANIA_01223 ANIA_01545 ANIA_02086 ANIA_02142 ANIA_02164 ANIA_02431 ANIA_03454 ANIA_04293 ANIA_04942 ANIA_05627 ANIA_05717 ANIA_06006 ANIA_06143 ANIA_06591 ANIA_06734 ANIA_06738 ANIA_06980 ANIA_07481 ANIA_07731 ANIA_08863 ANIA_10082 ANIA_10112 ANIA_10895
0.000424154	17	23	2.48924	Glycosyl compound biosynthetic process	http://amigo.geneontology.org/amigo/term/GO:1901659	ANIA_00128 ANIA_00130 ANIA_00502 ANIA_00662 ANIA_02494 ANIA_03222 ANIA_04382 ANIA_04561 ANIA_05492 ANIA_05884 ANIA_07108 ANIA_07502 ANIA_08214 ANIA_08847 ANIA_08869 ANIA_09083 ANIA_10230
0.000434057	42	81	1.76809	Regulation of translation	http://amigo.geneontology.org/amigo/term/GO:0006417	ANIA_00167 ANIA_00505 ANIA_00720 ANIA_01344 ANIA_01665 ANIA_02065 ANIA_02080 ANIA_02246 ANIA_02482 ANIA_02775 ANIA_03055 ANIA_03411 ANIA_04000 ANIA_04015 ANIA_04085 ANIA_04163 ANIA_04202 ANIA_04470 ANIA_04965 ANIA_05179 ANIA_05898 ANIA_06199 ANIA_06283 ANIA_06587 ANIA_07492 ANIA_07554 ANIA_07628 ANIA_07746 ANIA_08173 ANIA_09065 ANIA_09090 ANIA_09093 ANIA_09437 ANIA_10119 ANIA_10121 ANIA_10248 ANI…
0.000470962	25	40	2.10487	Import into nucleus	http://amigo.geneontology.org/amigo/term/GO:0051170	ANIA_00084 ANIA_00124 ANIA_00906 ANIA_01190 ANIA_01223 ANIA_01401 ANIA_02086 ANIA_02142 ANIA_02164 ANIA_02431 ANIA_03454 ANIA_04293 ANIA_04942 ANIA_05627 ANIA_05717 ANIA_06006 ANIA_06143 ANIA_06591 ANIA_06734 ANIA_06738 ANIA_06980 ANIA_07481 ANIA_07731 ANIA_08863 ANIA_10112
0.000497683	39	73	1.79923	Process utilizing autophagic mechanism	http://amigo.geneontology.org/amigo/term/GO:0061919	ANIA_00127 ANIA_00405 ANIA_00439 ANIA_00576 ANIA_00763 ANIA_00953 ANIA_01545 ANIA_01867 ANIA_02093 ANIA_02280 ANIA_02876 ANIA_02887 ANIA_03584 ANIA_03807 ANIA_04278 ANIA_04709 ANIA_04832 ANIA_04886 ANIA_05174 ANIA_05876 ANIA_05982 ANIA_06267 ANIA_06351 ANIA_06360 ANIA_06890 ANIA_07428 ANIA_07437 ANIA_07464 ANIA_07591 ANIA_07602 ANIA_08874 ANIA_09467 ANIA_10171 ANIA_10213 ANIA_10594 ANIA_10849 ANI…
0.000497683	196	524	1.28172	Transcription regulator activity	http://amigo.geneontology.org/amigo/term/GO:0140110	ANIA_00094 ANIA_00096 ANIA_00148 ANIA_00197 ANIA_00202 ANIA_00388 ANIA_00486 ANIA_00507 ANIA_00568 ANIA_00671 ANIA_00680 ANIA_00719 ANIA_00891 ANIA_00902 ANIA_00937 ANIA_01028 ANIA_01227 ANIA_01265 ANIA_01286 ANIA_01303 ANIA_01406 ANIA_01584 ANIA_01599 ANIA_01669 ANIA_01686 ANIA_01705 ANIA_01729 ANIA_01812 ANIA_02001 ANIA_02046 ANIA_02078 ANIA_02123 ANIA_02270 ANIA_02324 ANIA_02495 ANIA_02650 ANI…
0.000497683	39	73	1.79923	Autophagy	http://amigo.geneontology.org/amigo/term/GO:0006914	ANIA_00127 ANIA_00405 ANIA_00439 ANIA_00576 ANIA_00763 ANIA_00953 ANIA_01545 ANIA_01867 ANIA_02093 ANIA_02280 ANIA_02876 ANIA_02887 ANIA_03584 ANIA_03807 ANIA_04278 ANIA_04709 ANIA_04832 ANIA_04886 ANIA_05174 ANIA_05876 ANIA_05982 ANIA_06267 ANIA_06351 ANIA_06360 ANIA_06890 ANIA_07428 ANIA_07437 ANIA_07464 ANIA_07591 ANIA_07602 ANIA_08874 ANIA_09467 ANIA_10171 ANIA_10213 ANIA_10594 ANIA_10849 ANI…
0.000520735	82	188	1.48473	Regulation of catalytic activity	http://amigo.geneontology.org/amigo/term/GO:0050790	ANIA_00084 ANIA_00108 ANIA_00163 ANIA_00261 ANIA_00504 ANIA_00911 ANIA_01025 ANIA_01038 ANIA_01167 ANIA_01272 ANIA_01344 ANIA_01400 ANIA_01535 ANIA_01545 ANIA_01629 ANIA_01661 ANIA_01668 ANIA_01669 ANIA_01779 ANIA_01931 ANIA_01980 ANIA_02081 ANIA_02141 ANIA_02172 ANIA_02211 ANIA_02222 ANIA_02491 ANIA_02514 ANIA_02878 ANIA_03095 ANIA_03422 ANIA_03625 ANIA_03905 ANIA_03937 ANIA_04000 ANIA_04066 ANI…
0.000527047	266	738	1.23223	Transition metal ion binding	http://amigo.geneontology.org/amigo/term/GO:0046914	ANIA_00042 ANIA_00094 ANIA_00096 ANIA_00148 ANIA_00158 ANIA_00197 ANIA_00202 ANIA_00232 ANIA_00241 ANIA_00261 ANIA_00338 ANIA_00388 ANIA_00443 ANIA_00459 ANIA_00486 ANIA_00507 ANIA_00556 ANIA_00568 ANIA_00646 ANIA_00667 ANIA_00680 ANIA_00774 ANIA_00797 ANIA_00878 ANIA_00891 ANIA_00901 ANIA_00902 ANIA_00918 ANIA_00937 ANIA_00949 ANIA_01006 ANIA_01028 ANIA_01087 ANIA_01301 ANIA_01303 ANIA_01403 ANI…
0.000529515	75	170	1.51248	Regulation of cellular component organization	http://amigo.geneontology.org/amigo/term/GO:0051128	ANIA_00184 ANIA_00306 ANIA_00410 ANIA_00439 ANIA_00504 ANIA_00673 ANIA_00905 ANIA_00910 ANIA_01171 ANIA_01191 ANIA_01306 ANIA_01325 ANIA_01398 ANIA_01545 ANIA_01980 ANIA_02126 ANIA_02141 ANIA_02222 ANIA_02302 ANIA_02439 ANIA_02484 ANIA_02491 ANIA_02756 ANIA_02862 ANIA_03065 ANIA_03067 ANIA_03171 ANIA_03411 ANIA_03946 ANIA_04015 ANIA_04085 ANIA_04167 ANIA_04168 ANIA_04236 ANIA_04278 ANIA_04399 ANI…
0.000553444	60	128	1.59109	Microtubule cytoskeleton	http://amigo.geneontology.org/amigo/term/GO:0015630	ANIA_00108 ANIA_00143 ANIA_00410 ANIA_00641 ANIA_00676 ANIA_01005 ANIA_01056 ANIA_01071 ANIA_01182 ANIA_01191 ANIA_01394 ANIA_01398 ANIA_01401 ANIA_01545 ANIA_01580 ANIA_01953 ANIA_02759 ANIA_02773 ANIA_02862 ANIA_02886 ANIA_03187 ANIA_03547 ANIA_03589 ANIA_03710 ANIA_03724 ANIA_03970 ANIA_04085 ANIA_04182 ANIA_04664 ANIA_04867 ANIA_04961 ANIA_05116 ANIA_05181 ANIA_05343 ANIA_05521 ANIA_05531 ANI…
0.000583324	23	36	2.15165	Protein import into nucleus	http://amigo.geneontology.org/amigo/term/GO:0006606	ANIA_00084 ANIA_00906 ANIA_01190 ANIA_01223 ANIA_02086 ANIA_02142 ANIA_02164 ANIA_02431 ANIA_03454 ANIA_04293 ANIA_04942 ANIA_05627 ANIA_05717 ANIA_06006 ANIA_06143 ANIA_06591 ANIA_06734 ANIA_06738 ANIA_06980 ANIA_07481 ANIA_07731 ANIA_08863 ANIA_10112
0.000597808	70	156	1.53082	Enzyme regulator activity	http://amigo.geneontology.org/amigo/term/GO:0030234	ANIA_00084 ANIA_00108 ANIA_00120 ANIA_00163 ANIA_00167 ANIA_00261 ANIA_00449 ANIA_00978 ANIA_01167 ANIA_01272 ANIA_01344 ANIA_01400 ANIA_01535 ANIA_01545 ANIA_01629 ANIA_01661 ANIA_01668 ANIA_01669 ANIA_01779 ANIA_01931 ANIA_01980 ANIA_02080 ANIA_02081 ANIA_02130 ANIA_02141 ANIA_02172 ANIA_02211 ANIA_02222 ANIA_02514 ANIA_02878 ANIA_03095 ANIA_03159 ANIA_03625 ANIA_03905 ANIA_03937 ANIA_04066 ANI…
0.00059896	27	45	2.02068	Negative regulation of mitotic cell cycle	http://amigo.geneontology.org/amigo/term/GO:0045930	ANIA_00410 ANIA_00556 ANIA_00676 ANIA_01207 ANIA_01545 ANIA_01779 ANIA_02302 ANIA_02439 ANIA_02969 ANIA_03040 ANIA_03118 ANIA_03450 ANIA_03619 ANIA_03946 ANIA_04085 ANIA_04271 ANIA_04279 ANIA_04571 ANIA_05406 ANIA_05494 ANIA_06616 ANIA_06878 ANIA_08876 ANIA_09413 ANIA_09435 ANIA_09467 ANIA_10434
0.000598984	64	140	1.56188	Cellular response to extracellular stimulus	http://amigo.geneontology.org/amigo/term/GO:0031668	ANIA_00241 ANIA_00388 ANIA_00439 ANIA_00554 ANIA_00568 ANIA_00671 ANIA_00953 ANIA_01406 ANIA_01733 ANIA_01812 ANIA_02180 ANIA_02955 ANIA_03217 ANIA_03269 ANIA_03280 ANIA_03300 ANIA_03502 ANIA_03683 ANIA_03684 ANIA_03986 ANIA_04001 ANIA_04163 ANIA_04166 ANIA_04489 ANIA_04750 ANIA_04785 ANIA_04821 ANIA_04837 ANIA_05174 ANIA_05708 ANIA_05823 ANIA_06293 ANIA_06832 ANIA_06846 ANIA_07189 ANIA_07388 ANI…
0.000598984	64	140	1.56188	Cellular response to nutrient levels	http://amigo.geneontology.org/amigo/term/GO:0031669	ANIA_00241 ANIA_00388 ANIA_00439 ANIA_00554 ANIA_00568 ANIA_00671 ANIA_00953 ANIA_01406 ANIA_01733 ANIA_01812 ANIA_02180 ANIA_02955 ANIA_03217 ANIA_03269 ANIA_03280 ANIA_03300 ANIA_03502 ANIA_03683 ANIA_03684 ANIA_03986 ANIA_04001 ANIA_04163 ANIA_04166 ANIA_04489 ANIA_04750 ANIA_04785 ANIA_04821 ANIA_04837 ANIA_05174 ANIA_05708 ANIA_05823 ANIA_06293 ANIA_06832 ANIA_06846 ANIA_07189 ANIA_07388 ANI…
0.000598984	64	140	1.56188	Cellular response to external stimulus	http://amigo.geneontology.org/amigo/term/GO:0071496	ANIA_00241 ANIA_00388 ANIA_00439 ANIA_00554 ANIA_00568 ANIA_00671 ANIA_00953 ANIA_01406 ANIA_01733 ANIA_01812 ANIA_02180 ANIA_02955 ANIA_03217 ANIA_03269 ANIA_03280 ANIA_03300 ANIA_03502 ANIA_03683 ANIA_03684 ANIA_03986 ANIA_04001 ANIA_04163 ANIA_04166 ANIA_04489 ANIA_04750 ANIA_04785 ANIA_04821 ANIA_04837 ANIA_05174 ANIA_05708 ANIA_05823 ANIA_06293 ANIA_06832 ANIA_06846 ANIA_07189 ANIA_07388 ANI…
0.00063165	22	34	2.17916	Positive regulation of phosphorus metabolic process	http://amigo.geneontology.org/amigo/term/GO:0010562	ANIA_00410 ANIA_00504 ANIA_01545 ANIA_01668 ANIA_01779 ANIA_02172 ANIA_02211 ANIA_03095 ANIA_03422 ANIA_04066 ANIA_04163 ANIA_04385 ANIA_04571 ANIA_05674 ANIA_05719 ANIA_06339 ANIA_06360 ANIA_08836 ANIA_09424 ANIA_10682 ANIA_10734 ANIA_11032
0.00063165	22	34	2.17916	Positive regulation of phosphate metabolic process	http://amigo.geneontology.org/amigo/term/GO:0045937	ANIA_00410 ANIA_00504 ANIA_01545 ANIA_01668 ANIA_01779 ANIA_02172 ANIA_02211 ANIA_03095 ANIA_03422 ANIA_04066 ANIA_04163 ANIA_04385 ANIA_04571 ANIA_05674 ANIA_05719 ANIA_06339 ANIA_06360 ANIA_08836 ANIA_09424 ANIA_10682 ANIA_10734 ANIA_11032
0.000686799	110	275	1.3927	Nucleobase-containing small molecule metabolic process	http://amigo.geneontology.org/amigo/term/GO:0055086	ANIA_00070 ANIA_00490 ANIA_00495 ANIA_00504 ANIA_00565 ANIA_00591 ANIA_00662 ANIA_00667 ANIA_00743 ANIA_00868 ANIA_00891 ANIA_00893 ANIA_00919 ANIA_01071 ANIA_01271 ANIA_01480 ANIA_01498 ANIA_01580 ANIA_01694 ANIA_01806 ANIA_01857 ANIA_01911 ANIA_01965 ANIA_02180 ANIA_02311 ANIA_02334 ANIA_02435 ANIA_02473 ANIA_02494 ANIA_02762 ANIA_02875 ANIA_02938 ANIA_03169 ANIA_03222 ANIA_03340 ANIA_03419 ANI…
0.000734793	13	16	2.73633	Proteasomal ubiquitin-independent protein catabolic process	http://amigo.geneontology.org/amigo/term/GO:0010499	ANIA_01757 ANIA_02085 ANIA_03493 ANIA_03756 ANIA_03932 ANIA_04449 ANIA_04457 ANIA_04869 ANIA_05793 ANIA_05872 ANIA_06547 ANIA_06726 ANIA_08054
0.000734793	13	16	2.73633	Proteasome core complex	http://amigo.geneontology.org/amigo/term/GO:0005839	ANIA_01757 ANIA_02085 ANIA_03493 ANIA_03756 ANIA_03932 ANIA_04449 ANIA_04457 ANIA_04869 ANIA_05793 ANIA_05872 ANIA_06547 ANIA_06726 ANIA_08054
0.000734793	13	16	2.73633	Threonine-type endopeptidase activity	http://amigo.geneontology.org/amigo/term/GO:0004298	ANIA_01757 ANIA_02085 ANIA_03493 ANIA_03756 ANIA_03932 ANIA_04449 ANIA_04457 ANIA_04869 ANIA_05793 ANIA_05872 ANIA_06547 ANIA_06726 ANIA_08054
0.000836624	42	84	1.72497	Catalytic activity, acting on a tRNA	http://amigo.geneontology.org/amigo/term/GO:0140101	ANIA_00128 ANIA_00130 ANIA_00189 ANIA_00502 ANIA_00705 ANIA_00956 ANIA_01201 ANIA_01380 ANIA_01751 ANIA_01913 ANIA_02150 ANIA_02190 ANIA_03652 ANIA_03702 ANIA_03824 ANIA_04086 ANIA_04550 ANIA_05119 ANIA_06088 ANIA_06488 ANIA_07028 ANIA_07361 ANIA_07479 ANIA_08066 ANIA_08214 ANIA_08224 ANIA_08653 ANIA_08721 ANIA_08799 ANIA_08800 ANIA_08867 ANIA_09400 ANIA_09419 ANIA_10195 ANIA_10353 ANIA_10450 ANI…
0.000842911	14	21	2.6194	DNA replication	http://www.genome.jp/kegg-bin/show_pathway?ani03030	ANIA_00260 ANIA_00582 ANIA_02446 ANIA_02764 ANIA_03033 ANIA_03067 ANIA_05114 ANIA_05992 ANIA_06300 ANIA_06517 ANIA_07308 ANIA_07325 ANIA_07439 ANIA_07493
0.000842911	14	18	2.6194	Ribonucleoside metabolic process	http://amigo.geneontology.org/amigo/term/GO:0009119	ANIA_00662 ANIA_02494 ANIA_03222 ANIA_04561 ANIA_05492 ANIA_05884 ANIA_06072 ANIA_06490 ANIA_08214 ANIA_08571 ANIA_08847 ANIA_09083 ANIA_10230 ANIA_11146
0.000868757	49	100	1.65022	Mitotic nuclear division	http://amigo.geneontology.org/amigo/term/GO:0140014	ANIA_00143 ANIA_00410 ANIA_00504 ANIA_00676 ANIA_00848 ANIA_00905 ANIA_00960 ANIA_01005 ANIA_01182 ANIA_01191 ANIA_01223 ANIA_01286 ANIA_01398 ANIA_01545 ANIA_01779 ANIA_02160 ANIA_02302 ANIA_02439 ANIA_02963 ANIA_03187 ANIA_03451 ANIA_03579 ANIA_03710 ANIA_03946 ANIA_04085 ANIA_04399 ANIA_04597 ANIA_04735 ANIA_04804 ANIA_04867 ANIA_04961 ANIA_05495 ANIA_05717 ANIA_05873 ANIA_05899 ANIA_07048 ANI…
0.00088262	33	61	1.85229	ATP-dependent activity, acting on DNA	http://amigo.geneontology.org/amigo/term/GO:0008094	ANIA_00083 ANIA_00327 ANIA_00424 ANIA_00872 ANIA_01237 ANIA_01479 ANIA_01708 ANIA_02087 ANIA_02160 ANIA_02491 ANIA_02969 ANIA_03619 ANIA_03749 ANIA_03797 ANIA_03940 ANIA_04432 ANIA_04552 ANIA_05092 ANIA_05278 ANIA_05406 ANIA_05617 ANIA_05992 ANIA_06300 ANIA_06517 ANIA_06728 ANIA_07753 ANIA_08064 ANIA_09436 ANIA_10043 ANIA_10145 ANIA_10414 ANIA_10497 ANIA_10757
0.0008851	17	24	2.38552	Nuclear DNA replication	http://amigo.geneontology.org/amigo/term/GO:0033260	ANIA_00129 ANIA_00872 ANIA_01237 ANIA_01435 ANIA_01779 ANIA_02491 ANIA_03040 ANIA_03067 ANIA_03450 ANIA_03619 ANIA_05901 ANIA_05992 ANIA_06069 ANIA_07325 ANIA_07423 ANIA_10497 ANIA_10755
0.0008851	17	24	2.38552	Cell cycle DNA replication	http://amigo.geneontology.org/amigo/term/GO:0044786	ANIA_00129 ANIA_00872 ANIA_01237 ANIA_01435 ANIA_01779 ANIA_02491 ANIA_03040 ANIA_03067 ANIA_03450 ANIA_03619 ANIA_05901 ANIA_05992 ANIA_06069 ANIA_07325 ANIA_07423 ANIA_10497 ANIA_10755
0.0008851	63	139	1.54869	Nuclear division	http://amigo.geneontology.org/amigo/term/GO:0000280	ANIA_00143 ANIA_00410 ANIA_00504 ANIA_00556 ANIA_00676 ANIA_00848 ANIA_00905 ANIA_00960 ANIA_01005 ANIA_01182 ANIA_01191 ANIA_01223 ANIA_01237 ANIA_01286 ANIA_01398 ANIA_01545 ANIA_01779 ANIA_01843 ANIA_02160 ANIA_02302 ANIA_02439 ANIA_02963 ANIA_03065 ANIA_03118 ANIA_03187 ANIA_03451 ANIA_03579 ANIA_03619 ANIA_03710 ANIA_03946 ANIA_04085 ANIA_04399 ANIA_04597 ANIA_04735 ANIA_04752 ANIA_04804 ANI…
0.0008851	15	20	2.52585	Threonine-type peptidase activity	http://amigo.geneontology.org/amigo/term/GO:0070003	ANIA_01757 ANIA_02085 ANIA_03493 ANIA_03756 ANIA_03932 ANIA_04449 ANIA_04457 ANIA_04869 ANIA_05658 ANIA_05793 ANIA_05872 ANIA_06547 ANIA_06726 ANIA_08054 ANIA_10444
0.000901835	52	108	1.62153	Cell division	http://amigo.geneontology.org/amigo/term/GO:0051301	ANIA_00143 ANIA_00166 ANIA_00410 ANIA_00676 ANIA_00699 ANIA_00905 ANIA_00911 ANIA_00960 ANIA_01171 ANIA_01394 ANIA_01398 ANIA_01399 ANIA_01545 ANIA_02130 ANIA_02412 ANIA_02772 ANIA_02862 ANIA_02963 ANIA_03187 ANIA_03451 ANIA_03724 ANIA_04085 ANIA_04182 ANIA_04385 ANIA_04735 ANIA_04961 ANIA_05181 ANIA_05529 ANIA_05666 ANIA_05686 ANIA_05815 ANIA_05899 ANIA_06138 ANIA_06224 ANIA_06288 ANIA_06364 ANI…
0.000965304	39	75	1.75125	Positive regulation of cellular protein metabolic process	http://amigo.geneontology.org/amigo/term/GO:0032270	ANIA_00410 ANIA_00505 ANIA_00910 ANIA_00911 ANIA_01167 ANIA_01545 ANIA_01668 ANIA_01779 ANIA_02172 ANIA_02211 ANIA_03095 ANIA_03422 ANIA_04000 ANIA_04015 ANIA_04066 ANIA_04163 ANIA_04385 ANIA_04449 ANIA_04457 ANIA_04470 ANIA_04571 ANIA_05674 ANIA_05719 ANIA_05961 ANIA_06339 ANIA_06360 ANIA_07259 ANIA_08173 ANIA_08836 ANIA_08863 ANIA_09065 ANIA_09093 ANIA_09320 ANIA_09424 ANIA_10017 ANIA_10315 ANI…
0.00103223	107	265	1.38598	Vesicle-mediated transport	http://amigo.geneontology.org/amigo/term/GO:0016192	ANIA_00095 ANIA_00165 ANIA_00244 ANIA_00255 ANIA_00261 ANIA_00317 ANIA_00347 ANIA_00462 ANIA_00576 ANIA_00699 ANIA_00706 ANIA_00763 ANIA_01002 ANIA_01023 ANIA_01038 ANIA_01177 ANIA_01248 ANIA_01272 ANIA_01283 ANIA_01293 ANIA_01297 ANIA_01462 ANIA_01629 ANIA_01796 ANIA_01845 ANIA_01931 ANIA_01980 ANIA_02066 ANIA_02093 ANIA_02094 ANIA_02222 ANIA_02418 ANIA_02736 ANIA_02756 ANIA_03015 ANIA_03029 ANI…
0.00109368	34	64	1.81754	Condensed chromosome	http://amigo.geneontology.org/amigo/term/GO:0000793	ANIA_00126 ANIA_00143 ANIA_00166 ANIA_00960 ANIA_01056 ANIA_01191 ANIA_01237 ANIA_01398 ANIA_01401 ANIA_01432 ANIA_01977 ANIA_02143 ANIA_02439 ANIA_02765 ANIA_02886 ANIA_02963 ANIA_03187 ANIA_03451 ANIA_03619 ANIA_03710 ANIA_04804 ANIA_04961 ANIA_05521 ANIA_06224 ANIA_06600 ANIA_06616 ANIA_07048 ANIA_08263 ANIA_08719 ANIA_08742 ANIA_09435 ANIA_09467 ANIA_10240 ANIA_10415
0.00113213	36	70	1.78295	Nuclear-transcribed mRNA catabolic process	http://amigo.geneontology.org/amigo/term/GO:0000956	ANIA_00434 ANIA_00505 ANIA_00632 ANIA_00646 ANIA_00767 ANIA_02065 ANIA_02080 ANIA_02153 ANIA_02252 ANIA_02271 ANIA_03411 ANIA_03657 ANIA_03739 ANIA_03812 ANIA_04000 ANIA_04530 ANIA_04965 ANIA_05154 ANIA_05898 ANIA_06007 ANIA_06199 ANIA_06514 ANIA_06587 ANIA_06600 ANIA_06695 ANIA_07492 ANIA_07628 ANIA_07714 ANIA_07746 ANIA_09090 ANIA_10119 ANIA_10121 ANIA_10164 ANIA_10362 ANIA_10406 ANIA_11052
0.00113213	311	884	1.19838	Organonitrogen compound biosynthetic process	http://amigo.geneontology.org/amigo/term/GO:1901566	ANIA_00050 ANIA_00086 ANIA_00106 ANIA_00121 ANIA_00127 ANIA_00128 ANIA_00130 ANIA_00167 ANIA_00256 ANIA_00270 ANIA_00278 ANIA_00385 ANIA_00490 ANIA_00495 ANIA_00502 ANIA_00505 ANIA_00551 ANIA_00554 ANIA_00565 ANIA_00591 ANIA_00636 ANIA_00641 ANIA_00648 ANIA_00662 ANIA_00667 ANIA_00687 ANIA_00705 ANIA_00720 ANIA_00797 ANIA_00840 ANIA_00872 ANIA_00893 ANIA_00906 ANIA_00907 ANIA_00910 ANIA_00912 ANI…
0.00114417	163	428	1.2947	Organonitrogen compound catabolic process	http://amigo.geneontology.org/amigo/term/GO:1901565	ANIA_00084 ANIA_00221 ANIA_00232 ANIA_00299 ANIA_00349 ANIA_00418 ANIA_00551 ANIA_00554 ANIA_00593 ANIA_00596 ANIA_00662 ANIA_00810 ANIA_00883 ANIA_00891 ANIA_00905 ANIA_00911 ANIA_01167 ANIA_01271 ANIA_01293 ANIA_01480 ANIA_01498 ANIA_01541 ANIA_01573 ANIA_01638 ANIA_01658 ANIA_01726 ANIA_01733 ANIA_01742 ANIA_01757 ANIA_01809 ANIA_01857 ANIA_01909 ANIA_02066 ANIA_02085 ANIA_02237 ANIA_02240 ANI…
0.00120202	31	56	1.86432	Regulation of mitotic cell cycle phase transition	http://amigo.geneontology.org/amigo/term/GO:1901990	ANIA_00410 ANIA_00556 ANIA_00872 ANIA_00905 ANIA_01207 ANIA_01545 ANIA_01779 ANIA_02302 ANIA_02439 ANIA_02969 ANIA_03040 ANIA_03118 ANIA_03450 ANIA_03946 ANIA_04085 ANIA_04182 ANIA_04571 ANIA_04735 ANIA_05494 ANIA_05495 ANIA_05717 ANIA_05820 ANIA_06078 ANIA_06616 ANIA_07206 ANIA_08013 ANIA_08876 ANIA_09413 ANIA_09435 ANIA_09467 ANIA_10434
0.00134634	41	81	1.70469	Mitotic sister chromatid segregation	http://amigo.geneontology.org/amigo/term/GO:0000070	ANIA_00143 ANIA_00410 ANIA_00504 ANIA_00676 ANIA_00848 ANIA_00905 ANIA_00960 ANIA_01182 ANIA_01191 ANIA_01223 ANIA_01286 ANIA_01398 ANIA_01545 ANIA_02160 ANIA_02302 ANIA_02439 ANIA_02963 ANIA_03187 ANIA_03451 ANIA_03579 ANIA_03710 ANIA_03946 ANIA_04085 ANIA_04399 ANIA_04597 ANIA_04735 ANIA_04804 ANIA_04961 ANIA_05495 ANIA_05899 ANIA_07048 ANIA_07296 ANIA_07423 ANIA_07499 ANIA_08013 ANIA_08719 ANI…
0.00134908	8	8	3.3678	Magnesium-dependent protein serine/threonine phosphatase complex	http://amigo.geneontology.org/amigo/term/GO:0005963	ANIA_00504 ANIA_01545 ANIA_03625 ANIA_03905 ANIA_04085 ANIA_08820 ANIA_09467 ANIA_10111
0.00134908	8	8	3.3678	COP9 signalosome	http://amigo.geneontology.org/amigo/term/GO:0008180	ANIA_01491 ANIA_01539 ANIA_02129 ANIA_02233 ANIA_03623 ANIA_04783 ANIA_05798 ANIA_10208
0.00134908	48	101	1.63287	TRNA processing	http://amigo.geneontology.org/amigo/term/GO:0008033	ANIA_00114 ANIA_00128 ANIA_00130 ANIA_00161 ANIA_00189 ANIA_00191 ANIA_00502 ANIA_00504 ANIA_00767 ANIA_00804 ANIA_00956 ANIA_01296 ANIA_01385 ANIA_01401 ANIA_01751 ANIA_02105 ANIA_02190 ANIA_02252 ANIA_02327 ANIA_02499 ANIA_02513 ANIA_03012 ANIA_03652 ANIA_03792 ANIA_04786 ANIA_05119 ANIA_06088 ANIA_06165 ANIA_06349 ANIA_06522 ANIA_06569 ANIA_06604 ANIA_06734 ANIA_07028 ANIA_08066 ANIA_08214 ANI…
0.00138061	20	31	2.17277	Post-Golgi vesicle-mediated transport	http://amigo.geneontology.org/amigo/term/GO:0006892	ANIA_00462 ANIA_01002 ANIA_02094 ANIA_03098 ANIA_03122 ANIA_03144 ANIA_03821 ANIA_04014 ANIA_04207 ANIA_04463 ANIA_05705 ANIA_05710 ANIA_06112 ANIA_06493 ANIA_07993 ANIA_08291 ANIA_08710 ANIA_08879 ANIA_10061 ANIA_11007
0.00140374	30	56	1.871	Actin cytoskeleton	http://amigo.geneontology.org/amigo/term/GO:0015629	ANIA_00184 ANIA_00306 ANIA_00317 ANIA_00605 ANIA_00673 ANIA_01023 ANIA_01306 ANIA_01462 ANIA_01953 ANIA_02126 ANIA_02484 ANIA_02756 ANIA_03589 ANIA_03815 ANIA_04085 ANIA_04168 ANIA_04270 ANIA_04463 ANIA_04919 ANIA_05686 ANIA_05778 ANIA_06341 ANIA_07707 ANIA_08065 ANIA_08698 ANIA_08820 ANIA_08862 ANIA_09463 ANIA_10288 ANIA_10942
0.00141215	11	13	2.84967	Cellular amide catabolic process	http://amigo.geneontology.org/amigo/term/GO:0043605	ANIA_00232 ANIA_00418 ANIA_01480 ANIA_02248 ANIA_02270 ANIA_03104 ANIA_03656 ANIA_03957 ANIA_08777 ANIA_10079 ANIA_10950
0.00141215	11	13	2.84967	Protein serine/threonine phosphatase complex	http://amigo.geneontology.org/amigo/term/GO:0008287	ANIA_00410 ANIA_00504 ANIA_01400 ANIA_01545 ANIA_02425 ANIA_03625 ANIA_03905 ANIA_04085 ANIA_08820 ANIA_09467 ANIA_10111
0.00141215	11	13	2.84967	Phosphatase complex	http://amigo.geneontology.org/amigo/term/GO:1903293	ANIA_00410 ANIA_00504 ANIA_01400 ANIA_01545 ANIA_02425 ANIA_03625 ANIA_03905 ANIA_04085 ANIA_08820 ANIA_09467 ANIA_10111
0.00141215	24	40	2.02068	Mitotic cell cycle checkpoint signaling	http://amigo.geneontology.org/amigo/term/GO:0007093	ANIA_00410 ANIA_00556 ANIA_00676 ANIA_01207 ANIA_01545 ANIA_02439 ANIA_02969 ANIA_03040 ANIA_03118 ANIA_03450 ANIA_03619 ANIA_03946 ANIA_04085 ANIA_04279 ANIA_04571 ANIA_05406 ANIA_05494 ANIA_06616 ANIA_06878 ANIA_08876 ANIA_09413 ANIA_09435 ANIA_09467 ANIA_10434
0.0014739	64	144	1.51788	Response to extracellular stimulus	http://amigo.geneontology.org/amigo/term/GO:0009991	ANIA_00241 ANIA_00388 ANIA_00439 ANIA_00554 ANIA_00568 ANIA_00671 ANIA_00953 ANIA_01406 ANIA_01733 ANIA_01812 ANIA_02180 ANIA_02955 ANIA_03217 ANIA_03269 ANIA_03280 ANIA_03300 ANIA_03502 ANIA_03683 ANIA_03684 ANIA_03986 ANIA_04001 ANIA_04163 ANIA_04166 ANIA_04489 ANIA_04750 ANIA_04785 ANIA_04821 ANIA_04837 ANIA_05174 ANIA_05708 ANIA_05823 ANIA_06293 ANIA_06832 ANIA_06846 ANIA_07189 ANIA_07388 ANI…
0.0014739	64	144	1.51788	Response to nutrient levels	http://amigo.geneontology.org/amigo/term/GO:0031667	ANIA_00241 ANIA_00388 ANIA_00439 ANIA_00554 ANIA_00568 ANIA_00671 ANIA_00953 ANIA_01406 ANIA_01733 ANIA_01812 ANIA_02180 ANIA_02955 ANIA_03217 ANIA_03269 ANIA_03280 ANIA_03300 ANIA_03502 ANIA_03683 ANIA_03684 ANIA_03986 ANIA_04001 ANIA_04163 ANIA_04166 ANIA_04489 ANIA_04750 ANIA_04785 ANIA_04821 ANIA_04837 ANIA_05174 ANIA_05708 ANIA_05823 ANIA_06293 ANIA_06832 ANIA_06846 ANIA_07189 ANIA_07388 ANI…
0.00148258	19	29	2.20649	DNA replication initiation	http://amigo.geneontology.org/amigo/term/GO:0006270	ANIA_00872 ANIA_01207 ANIA_01259 ANIA_01435 ANIA_01976 ANIA_02491 ANIA_03040 ANIA_03067 ANIA_03450 ANIA_03940 ANIA_04771 ANIA_05892 ANIA_05901 ANIA_05992 ANIA_08710 ANIA_10072 ANIA_10434 ANIA_10497 ANIA_10755
0.00148258	19	29	2.20649	Ribonucleoside monophosphate biosynthetic process	http://amigo.geneontology.org/amigo/term/GO:0009156	ANIA_00495 ANIA_00565 ANIA_00893 ANIA_00919 ANIA_01965 ANIA_05884 ANIA_05904 ANIA_06078 ANIA_06157 ANIA_06209 ANIA_06541 ANIA_06711 ANIA_07469 ANIA_07502 ANIA_08121 ANIA_08872 ANIA_09083 ANIA_10131 ANIA_10753
0.00150733	72	166	1.47854	Molecular function regulator	http://amigo.geneontology.org/amigo/term/GO:0098772	ANIA_00084 ANIA_00108 ANIA_00120 ANIA_00163 ANIA_00167 ANIA_00261 ANIA_00449 ANIA_00978 ANIA_01167 ANIA_01272 ANIA_01344 ANIA_01400 ANIA_01535 ANIA_01545 ANIA_01629 ANIA_01661 ANIA_01668 ANIA_01669 ANIA_01779 ANIA_01931 ANIA_01980 ANIA_02080 ANIA_02081 ANIA_02130 ANIA_02141 ANIA_02172 ANIA_02211 ANIA_02222 ANIA_02514 ANIA_02878 ANIA_03095 ANIA_03159 ANIA_03625 ANIA_03905 ANIA_03937 ANIA_04066 ANI…
0.00158203	124	313	1.33848	Transferase complex	http://amigo.geneontology.org/amigo/term/GO:1990234	ANIA_00065 ANIA_00083 ANIA_00138 ANIA_00154 ANIA_00191 ANIA_00192 ANIA_00260 ANIA_00321 ANIA_00327 ANIA_00576 ANIA_00596 ANIA_00636 ANIA_00668 ANIA_00719 ANIA_00810 ANIA_00816 ANIA_00883 ANIA_00905 ANIA_00911 ANIA_01208 ANIA_01328 ANIA_01360 ANIA_01369 ANIA_01494 ANIA_01668 ANIA_01669 ANIA_01867 ANIA_01965 ANIA_01976 ANIA_01981 ANIA_02002 ANIA_02049 ANIA_02172 ANIA_02211 ANIA_02214 ANIA_02240 ANI…
0.00160007	23	38	2.0384	Positive regulation of organelle organization	http://amigo.geneontology.org/amigo/term/GO:0010638	ANIA_00184 ANIA_00306 ANIA_00410 ANIA_00673 ANIA_00905 ANIA_00910 ANIA_01306 ANIA_01398 ANIA_01545 ANIA_04735 ANIA_04919 ANIA_05778 ANIA_06341 ANIA_07423 ANIA_08013 ANIA_08065 ANIA_08698 ANIA_08863 ANIA_09467 ANIA_10119 ANIA_10121 ANIA_10942 ANIA_10956
0.00160235	365	1064	1.17406	Small molecule metabolic process	http://amigo.geneontology.org/amigo/term/GO:0044281	ANIA_00034 ANIA_00050 ANIA_00070 ANIA_00106 ANIA_00148 ANIA_00150 ANIA_00156 ANIA_00202 ANIA_00206 ANIA_00232 ANIA_00256 ANIA_00270 ANIA_00385 ANIA_00388 ANIA_00418 ANIA_00423 ANIA_00469 ANIA_00490 ANIA_00495 ANIA_00504 ANIA_00554 ANIA_00562 ANIA_00565 ANIA_00591 ANIA_00593 ANIA_00609 ANIA_00648 ANIA_00662 ANIA_00667 ANIA_00687 ANIA_00705 ANIA_00720 ANIA_00743 ANIA_00774 ANIA_00797 ANIA_00807 ANI…
0.00169332	12	15	2.69424	Mitotic G2/M transition checkpoint	http://amigo.geneontology.org/amigo/term/GO:0044818	ANIA_00556 ANIA_01207 ANIA_01545 ANIA_02969 ANIA_03040 ANIA_03118 ANIA_03450 ANIA_04571 ANIA_05494 ANIA_06616 ANIA_08876 ANIA_10434
0.00176092	71	164	1.47601	Cytoskeleton organization	http://amigo.geneontology.org/amigo/term/GO:0007010	ANIA_00084 ANIA_00108 ANIA_00184 ANIA_00306 ANIA_00410 ANIA_00414 ANIA_00504 ANIA_00594 ANIA_00605 ANIA_00673 ANIA_00676 ANIA_00848 ANIA_01005 ANIA_01023 ANIA_01056 ANIA_01171 ANIA_01182 ANIA_01306 ANIA_01398 ANIA_01462 ANIA_02126 ANIA_02484 ANIA_02756 ANIA_02862 ANIA_03171 ANIA_03454 ANIA_03579 ANIA_03589 ANIA_03673 ANIA_03724 ANIA_03905 ANIA_04085 ANIA_04168 ANIA_04182 ANIA_04270 ANIA_04278 ANI…
0.00178979	39	77	1.70577	Mitotic cell cycle phase transition	http://amigo.geneontology.org/amigo/term/GO:0044772	ANIA_00084 ANIA_00410 ANIA_00504 ANIA_00556 ANIA_00872 ANIA_00905 ANIA_01207 ANIA_01545 ANIA_01779 ANIA_01867 ANIA_02302 ANIA_02412 ANIA_02439 ANIA_02969 ANIA_03040 ANIA_03118 ANIA_03154 ANIA_03450 ANIA_03946 ANIA_04085 ANIA_04182 ANIA_04271 ANIA_04571 ANIA_04735 ANIA_05494 ANIA_05495 ANIA_05717 ANIA_05820 ANIA_06078 ANIA_06616 ANIA_07206 ANIA_08013 ANIA_08092 ANIA_08820 ANIA_08876 ANIA_09413 ANI…
0.00178979	39	77	1.70577	Positive regulation of protein metabolic process	http://amigo.geneontology.org/amigo/term/GO:0051247	ANIA_00410 ANIA_00505 ANIA_00910 ANIA_00911 ANIA_01167 ANIA_01545 ANIA_01668 ANIA_01779 ANIA_02172 ANIA_02211 ANIA_03095 ANIA_03422 ANIA_04000 ANIA_04015 ANIA_04066 ANIA_04163 ANIA_04385 ANIA_04449 ANIA_04457 ANIA_04470 ANIA_04571 ANIA_05674 ANIA_05719 ANIA_05961 ANIA_06339 ANIA_06360 ANIA_07259 ANIA_08173 ANIA_08836 ANIA_08863 ANIA_09065 ANIA_09093 ANIA_09320 ANIA_09424 ANIA_10017 ANIA_10315 ANI…
0.00178979	123	314	1.33625	Cellular amino acid metabolic process	http://amigo.geneontology.org/amigo/term/GO:0006520	ANIA_00050 ANIA_00202 ANIA_00385 ANIA_00490 ANIA_00554 ANIA_00565 ANIA_00593 ANIA_00648 ANIA_00687 ANIA_00705 ANIA_00720 ANIA_00797 ANIA_00840 ANIA_00912 ANIA_01135 ANIA_01137 ANIA_01201 ANIA_01271 ANIA_01342 ANIA_01380 ANIA_01513 ANIA_01541 ANIA_01673 ANIA_01726 ANIA_01733 ANIA_01809 ANIA_01857 ANIA_01908 ANIA_01913 ANIA_01965 ANIA_02150 ANIA_02248 ANIA_02350 ANIA_02882 ANIA_03031 ANIA_03096 ANI…
0.00192656	14	19	2.48153	Sister chromatid cohesion	http://amigo.geneontology.org/amigo/term/GO:0007062	ANIA_01223 ANIA_02143 ANIA_02160 ANIA_02963 ANIA_03946 ANIA_05102 ANIA_06517 ANIA_07296 ANIA_07423 ANIA_07499 ANIA_08742 ANIA_09467 ANIA_10253 ANIA_10414
0.00206341	79	190	1.43814	Organic cyclic compound catabolic process	http://amigo.geneontology.org/amigo/term/GO:1901361	ANIA_00258 ANIA_00434 ANIA_00505 ANIA_00632 ANIA_00646 ANIA_00662 ANIA_00767 ANIA_00891 ANIA_01271 ANIA_01480 ANIA_01498 ANIA_01809 ANIA_01857 ANIA_01976 ANIA_02065 ANIA_02080 ANIA_02153 ANIA_02252 ANIA_02271 ANIA_02494 ANIA_02764 ANIA_02938 ANIA_03013 ANIA_03014 ANIA_03104 ANIA_03411 ANIA_03431 ANIA_03591 ANIA_03657 ANIA_03739 ANIA_03812 ANIA_03897 ANIA_04000 ANIA_04425 ANIA_04530 ANIA_04546 ANI…
0.0020832	21	34	2.08011	Negative regulation of mitotic cell cycle phase transition	http://amigo.geneontology.org/amigo/term/GO:1901991	ANIA_00410 ANIA_00556 ANIA_01207 ANIA_01545 ANIA_01779 ANIA_02302 ANIA_02439 ANIA_02969 ANIA_03040 ANIA_03118 ANIA_03450 ANIA_03946 ANIA_04085 ANIA_04571 ANIA_05494 ANIA_06616 ANIA_08876 ANIA_09413 ANIA_09435 ANIA_09467 ANIA_10434
0.00217169	36	71	1.73201	Regulation of cellular catabolic process	http://amigo.geneontology.org/amigo/term/GO:0031329	ANIA_00439 ANIA_00953 ANIA_01545 ANIA_01867 ANIA_01976 ANIA_02065 ANIA_02080 ANIA_02270 ANIA_02271 ANIA_03739 ANIA_04000 ANIA_04546 ANIA_04965 ANIA_05808 ANIA_05898 ANIA_05961 ANIA_05982 ANIA_06199 ANIA_06587 ANIA_06695 ANIA_06890 ANIA_07492 ANIA_07628 ANIA_07714 ANIA_07746 ANIA_08777 ANIA_09090 ANIA_09320 ANIA_09467 ANIA_10119 ANIA_10121 ANIA_10138 ANIA_10164 ANIA_10362 ANIA_10406 ANIA_10956
0.00224426	24	41	1.97139	Positive regulation of protein modification process	http://amigo.geneontology.org/amigo/term/GO:0031401	ANIA_00410 ANIA_00911 ANIA_01545 ANIA_01668 ANIA_01779 ANIA_02172 ANIA_02211 ANIA_03095 ANIA_03422 ANIA_04066 ANIA_04163 ANIA_04385 ANIA_04571 ANIA_05674 ANIA_05719 ANIA_06339 ANIA_06360 ANIA_07259 ANIA_08836 ANIA_08863 ANIA_09424 ANIA_10017 ANIA_10763 ANIA_11032
0.00224426	72	167	1.46073	Protein modification by small protein conjugation or removal	http://amigo.geneontology.org/amigo/term/GO:0070647	ANIA_00173 ANIA_00596 ANIA_00810 ANIA_00883 ANIA_00905 ANIA_00906 ANIA_00911 ANIA_01191 ANIA_01491 ANIA_01539 ANIA_01658 ANIA_01746 ANIA_01909 ANIA_02129 ANIA_02214 ANIA_02233 ANIA_02298 ANIA_02302 ANIA_02327 ANIA_02413 ANIA_02416 ANIA_02441 ANIA_02450 ANIA_02458 ANIA_02490 ANIA_02761 ANIA_02961 ANIA_03039 ANIA_03447 ANIA_03453 ANIA_03623 ANIA_03711 ANIA_03939 ANIA_03999 ANIA_04166 ANIA_04271 ANI…
0.00224426	24	41	1.97139	Proteasome complex	http://amigo.geneontology.org/amigo/term/GO:0000502	ANIA_01167 ANIA_01757 ANIA_02085 ANIA_03493 ANIA_03716 ANIA_03756 ANIA_03932 ANIA_04236 ANIA_04449 ANIA_04457 ANIA_04492 ANIA_04731 ANIA_04775 ANIA_04869 ANIA_05121 ANIA_05774 ANIA_05793 ANIA_05872 ANIA_06547 ANIA_06726 ANIA_07579 ANIA_08054 ANIA_10020 ANIA_10519
0.00224426	64	146	1.4968	Response to external stimulus	http://amigo.geneontology.org/amigo/term/GO:0009605	ANIA_00241 ANIA_00388 ANIA_00439 ANIA_00554 ANIA_00568 ANIA_00671 ANIA_00953 ANIA_01406 ANIA_01733 ANIA_01812 ANIA_02180 ANIA_02955 ANIA_03217 ANIA_03269 ANIA_03280 ANIA_03300 ANIA_03502 ANIA_03683 ANIA_03684 ANIA_03986 ANIA_04001 ANIA_04163 ANIA_04166 ANIA_04489 ANIA_04750 ANIA_04785 ANIA_04821 ANIA_04837 ANIA_05174 ANIA_05708 ANIA_05823 ANIA_06293 ANIA_06832 ANIA_06846 ANIA_07189 ANIA_07388 ANI…
0.00233442	20	34	2.10487	Vesicle tethering complex	http://amigo.geneontology.org/amigo/term/GO:0099023	ANIA_00244 ANIA_00462 ANIA_01002 ANIA_01038 ANIA_01248 ANIA_02418 ANIA_02736 ANIA_03015 ANIA_04014 ANIA_04884 ANIA_04886 ANIA_06493 ANIA_06533 ANIA_06911 ANIA_07993 ANIA_08879 ANIA_09086 ANIA_10061 ANIA_10826 ANIA_11007
0.00233442	20	32	2.10487	Nucleoside monophosphate biosynthetic process	http://amigo.geneontology.org/amigo/term/GO:0009124	ANIA_00495 ANIA_00565 ANIA_00893 ANIA_00919 ANIA_01965 ANIA_05884 ANIA_05904 ANIA_06078 ANIA_06157 ANIA_06209 ANIA_06541 ANIA_06711 ANIA_07028 ANIA_07469 ANIA_07502 ANIA_08121 ANIA_08872 ANIA_09083 ANIA_10131 ANIA_10753
0.00251894	37	75	1.70697	MRNA catabolic process	http://amigo.geneontology.org/amigo/term/GO:0006402	ANIA_00434 ANIA_00505 ANIA_00632 ANIA_00646 ANIA_00767 ANIA_02065 ANIA_02080 ANIA_02153 ANIA_02252 ANIA_02271 ANIA_03411 ANIA_03657 ANIA_03739 ANIA_03812 ANIA_04000 ANIA_04530 ANIA_04546 ANIA_04965 ANIA_05154 ANIA_05898 ANIA_06007 ANIA_06199 ANIA_06514 ANIA_06587 ANIA_06600 ANIA_06695 ANIA_07492 ANIA_07628 ANIA_07714 ANIA_07746 ANIA_09090 ANIA_10119 ANIA_10121 ANIA_10164 ANIA_10362 ANIA_10406 ANI…
0.00251955	44	92	1.62839	Regulation of protein modification process	http://amigo.geneontology.org/amigo/term/GO:0031399	ANIA_00410 ANIA_00906 ANIA_00911 ANIA_01191 ANIA_01272 ANIA_01400 ANIA_01545 ANIA_01668 ANIA_01779 ANIA_02172 ANIA_02211 ANIA_02214 ANIA_03095 ANIA_03422 ANIA_03625 ANIA_03905 ANIA_04066 ANIA_04085 ANIA_04163 ANIA_04385 ANIA_04571 ANIA_05674 ANIA_05708 ANIA_05717 ANIA_05719 ANIA_05814 ANIA_06339 ANIA_06360 ANIA_07259 ANIA_08079 ANIA_08173 ANIA_08836 ANIA_08863 ANIA_09095 ANIA_09424 ANIA_09467 ANI…
0.00254865	26	46	1.90354	Amino acid activation	http://amigo.geneontology.org/amigo/term/GO:0043038	ANIA_00705 ANIA_01201 ANIA_01380 ANIA_01913 ANIA_02150 ANIA_03496 ANIA_03702 ANIA_03824 ANIA_04086 ANIA_04550 ANIA_06236 ANIA_06488 ANIA_07361 ANIA_07479 ANIA_08224 ANIA_08433 ANIA_08653 ANIA_08800 ANIA_08867 ANIA_09244 ANIA_09419 ANIA_10195 ANIA_10353 ANIA_10474 ANIA_10475 ANIA_11125
0.00255904	23	39	1.98614	Protein-DNA complex	http://amigo.geneontology.org/amigo/term/GO:0032993	ANIA_00260 ANIA_00582 ANIA_00872 ANIA_01208 ANIA_01435 ANIA_01906 ANIA_02141 ANIA_02446 ANIA_02491 ANIA_02765 ANIA_03033 ANIA_03040 ANIA_03940 ANIA_04771 ANIA_04797 ANIA_05901 ANIA_06687 ANIA_06827 ANIA_07308 ANIA_07325 ANIA_07423 ANIA_10470 ANIA_10755
0.00255904	23	39	1.98614	Nucleoside monophosphate metabolic process	http://amigo.geneontology.org/amigo/term/GO:0009123	ANIA_00495 ANIA_00565 ANIA_00893 ANIA_00919 ANIA_01965 ANIA_03619 ANIA_05884 ANIA_05904 ANIA_06078 ANIA_06157 ANIA_06209 ANIA_06541 ANIA_06711 ANIA_07028 ANIA_07469 ANIA_07502 ANIA_08121 ANIA_08213 ANIA_08860 ANIA_08872 ANIA_09083 ANIA_10131 ANIA_10753
0.00261095	19	30	2.13294	Positive regulation of phosphorylation	http://amigo.geneontology.org/amigo/term/GO:0042327	ANIA_01668 ANIA_01779 ANIA_02172 ANIA_02211 ANIA_03095 ANIA_03422 ANIA_04066 ANIA_04163 ANIA_04385 ANIA_04571 ANIA_05674 ANIA_05719 ANIA_06339 ANIA_06360 ANIA_08836 ANIA_09424 ANIA_10682 ANIA_10734 ANIA_11032
0.00261095	76	180	1.43794	Ligase activity	http://amigo.geneontology.org/amigo/term/GO:0016874	ANIA_00054 ANIA_00097 ANIA_00114 ANIA_00398 ANIA_00490 ANIA_00562 ANIA_00565 ANIA_00609 ANIA_00705 ANIA_00810 ANIA_00893 ANIA_01103 ANIA_01193 ANIA_01201 ANIA_01242 ANIA_01296 ANIA_01380 ANIA_01680 ANIA_01746 ANIA_01913 ANIA_02150 ANIA_02298 ANIA_02327 ANIA_02416 ANIA_02441 ANIA_02442 ANIA_02450 ANIA_02674 ANIA_02761 ANIA_03129 ANIA_03150 ANIA_03490 ANIA_03496 ANIA_03702 ANIA_03824 ANIA_03840 ANI…
0.00279941	57	131	1.52353	Nucleobase-containing compound catabolic process	http://amigo.geneontology.org/amigo/term/GO:0034655	ANIA_00258 ANIA_00434 ANIA_00505 ANIA_00632 ANIA_00646 ANIA_00662 ANIA_00767 ANIA_01498 ANIA_01976 ANIA_02065 ANIA_02080 ANIA_02153 ANIA_02252 ANIA_02271 ANIA_02494 ANIA_02764 ANIA_02938 ANIA_03014 ANIA_03411 ANIA_03657 ANIA_03739 ANIA_03812 ANIA_04000 ANIA_04425 ANIA_04530 ANIA_04546 ANIA_04958 ANIA_04965 ANIA_05114 ANIA_05154 ANIA_05188 ANIA_05492 ANIA_05655 ANIA_05898 ANIA_06007 ANIA_06199 ANI…
0.00287038	38	77	1.6839	Regulation of catabolic process	http://amigo.geneontology.org/amigo/term/GO:0009894	ANIA_00439 ANIA_00953 ANIA_01545 ANIA_01867 ANIA_01976 ANIA_02065 ANIA_02080 ANIA_02270 ANIA_02271 ANIA_02304 ANIA_03739 ANIA_04000 ANIA_04546 ANIA_04965 ANIA_05808 ANIA_05898 ANIA_05961 ANIA_05982 ANIA_06199 ANIA_06587 ANIA_06695 ANIA_06890 ANIA_07492 ANIA_07628 ANIA_07714 ANIA_07746 ANIA_08777 ANIA_09090 ANIA_09320 ANIA_09467 ANIA_10020 ANIA_10119 ANIA_10121 ANIA_10138 ANIA_10164 ANIA_10362 ANI…
0.00290257	30	56	1.80418	Positive regulation of cellular component organization	http://amigo.geneontology.org/amigo/term/GO:0051130	ANIA_00184 ANIA_00306 ANIA_00410 ANIA_00673 ANIA_00905 ANIA_00910 ANIA_01306 ANIA_01398 ANIA_01545 ANIA_02756 ANIA_03411 ANIA_04015 ANIA_04236 ANIA_04735 ANIA_04919 ANIA_05102 ANIA_05778 ANIA_06288 ANIA_06341 ANIA_06687 ANIA_07423 ANIA_08013 ANIA_08065 ANIA_08698 ANIA_08863 ANIA_09467 ANIA_10119 ANIA_10121 ANIA_10942 ANIA_10956
0.00295014	22	37	2.00247	Nucleotide-excision repair	http://amigo.geneontology.org/amigo/term/GO:0006289	ANIA_00097 ANIA_00138 ANIA_00582 ANIA_00596 ANIA_01668 ANIA_02304 ANIA_03067 ANIA_03629 ANIA_04037 ANIA_04283 ANIA_04331 ANIA_06616 ANIA_06827 ANIA_07015 ANIA_07308 ANIA_07325 ANIA_07423 ANIA_09436 ANIA_10641 ANIA_10757 ANIA_10978 ANIA_10989
0.00304474	66	154	1.47202	Organelle fission	http://amigo.geneontology.org/amigo/term/GO:0048285	ANIA_00143 ANIA_00410 ANIA_00504 ANIA_00556 ANIA_00676 ANIA_00848 ANIA_00905 ANIA_00960 ANIA_01005 ANIA_01182 ANIA_01191 ANIA_01223 ANIA_01237 ANIA_01286 ANIA_01398 ANIA_01545 ANIA_01779 ANIA_01843 ANIA_02160 ANIA_02302 ANIA_02439 ANIA_02963 ANIA_03065 ANIA_03118 ANIA_03187 ANIA_03451 ANIA_03579 ANIA_03619 ANIA_03710 ANIA_03946 ANIA_04085 ANIA_04399 ANIA_04597 ANIA_04735 ANIA_04752 ANIA_04804 ANI…
0.0036075	16	24	2.2452	Signal transduction in response to DNA damage	http://amigo.geneontology.org/amigo/term/GO:0042770	ANIA_00038 ANIA_00410 ANIA_00556 ANIA_02246 ANIA_03118 ANIA_03619 ANIA_03737 ANIA_04279 ANIA_04571 ANIA_05494 ANIA_06616 ANIA_06878 ANIA_06975 ANIA_07563 ANIA_08876 ANIA_10434
0.0036075	16	24	2.2452	DNA damage checkpoint signaling	http://amigo.geneontology.org/amigo/term/GO:0000077	ANIA_00038 ANIA_00410 ANIA_00556 ANIA_02246 ANIA_03118 ANIA_03619 ANIA_03737 ANIA_04279 ANIA_04571 ANIA_05494 ANIA_06616 ANIA_06878 ANIA_06975 ANIA_07563 ANIA_08876 ANIA_10434
0.00373701	7	7	3.3678	Proteasome core complex, alpha-subunit complex	http://amigo.geneontology.org/amigo/term/GO:0019773	ANIA_01757 ANIA_04869 ANIA_05793 ANIA_05872 ANIA_06547 ANIA_06726 ANIA_08054
0.00375277	81	195	1.40614	Cytoplasmic vesicle	http://amigo.geneontology.org/amigo/term/GO:0031410	ANIA_00088 ANIA_00127 ANIA_00244 ANIA_00255 ANIA_00256 ANIA_00261 ANIA_00317 ANIA_00347 ANIA_00551 ANIA_00575 ANIA_00576 ANIA_00706 ANIA_01023 ANIA_01038 ANIA_01177 ANIA_01248 ANIA_01293 ANIA_01462 ANIA_01638 ANIA_02066 ANIA_02093 ANIA_02094 ANIA_02288 ANIA_02418 ANIA_02521 ANIA_02736 ANIA_02756 ANIA_03015 ANIA_03100 ANIA_03122 ANIA_03144 ANIA_03171 ANIA_03188 ANIA_03584 ANIA_03594 ANIA_03720 ANI…
0.00375277	81	195	1.40614	Intracellular vesicle	http://amigo.geneontology.org/amigo/term/GO:0097708	ANIA_00088 ANIA_00127 ANIA_00244 ANIA_00255 ANIA_00256 ANIA_00261 ANIA_00317 ANIA_00347 ANIA_00551 ANIA_00575 ANIA_00576 ANIA_00706 ANIA_01023 ANIA_01038 ANIA_01177 ANIA_01248 ANIA_01293 ANIA_01462 ANIA_01638 ANIA_02066 ANIA_02093 ANIA_02094 ANIA_02288 ANIA_02418 ANIA_02521 ANIA_02736 ANIA_02756 ANIA_03015 ANIA_03100 ANIA_03122 ANIA_03144 ANIA_03171 ANIA_03188 ANIA_03584 ANIA_03594 ANIA_03720 ANI…
0.00385328	15	22	2.29622	Regulation of G2/M transition of mitotic cell cycle	http://amigo.geneontology.org/amigo/term/GO:0010389	ANIA_00556 ANIA_01207 ANIA_01545 ANIA_02969 ANIA_03040 ANIA_03118 ANIA_03450 ANIA_04182 ANIA_04571 ANIA_05494 ANIA_05717 ANIA_06078 ANIA_06616 ANIA_08876 ANIA_10434
0.00385328	15	22	2.29622	Mitotic DNA integrity checkpoint signaling	http://amigo.geneontology.org/amigo/term/GO:0044774	ANIA_00556 ANIA_01207 ANIA_02969 ANIA_03040 ANIA_03118 ANIA_03450 ANIA_03619 ANIA_04279 ANIA_04571 ANIA_05406 ANIA_05494 ANIA_06616 ANIA_06878 ANIA_08876 ANIA_10434
0.00385328	15	22	2.29622	Regulation of cell cycle G2/M phase transition	http://amigo.geneontology.org/amigo/term/GO:1902749	ANIA_00556 ANIA_01207 ANIA_01545 ANIA_02969 ANIA_03040 ANIA_03118 ANIA_03450 ANIA_04182 ANIA_04571 ANIA_05494 ANIA_05717 ANIA_06078 ANIA_06616 ANIA_08876 ANIA_10434
0.00386793	38	78	1.66203	Regulation of hydrolase activity	http://amigo.geneontology.org/amigo/term/GO:0051336	ANIA_00084 ANIA_00108 ANIA_00261 ANIA_01025 ANIA_01038 ANIA_01167 ANIA_01400 ANIA_01545 ANIA_01629 ANIA_01661 ANIA_01669 ANIA_01931 ANIA_01980 ANIA_02222 ANIA_03625 ANIA_03905 ANIA_04000 ANIA_04085 ANIA_04274 ANIA_04449 ANIA_04457 ANIA_04537 ANIA_04862 ANIA_04890 ANIA_04998 ANIA_05708 ANIA_05814 ANIA_06033 ANIA_06533 ANIA_07015 ANIA_09086 ANIA_09413 ANIA_09463 ANIA_09467 ANIA_10754 ANIA_10826 ANI…
0.00390568	20	34	2.04109	Cytosolic transport	http://amigo.geneontology.org/amigo/term/GO:0016482	ANIA_01038 ANIA_01272 ANIA_01283 ANIA_02094 ANIA_02736 ANIA_03015 ANIA_03144 ANIA_03594 ANIA_03821 ANIA_04014 ANIA_04463 ANIA_05710 ANIA_06289 ANIA_06598 ANIA_07602 ANIA_07993 ANIA_08868 ANIA_09356 ANIA_10594 ANIA_10918
0.0039391	11	14	2.64613	Telomeric DNA binding	http://amigo.geneontology.org/amigo/term/GO:0042162	ANIA_01906 ANIA_02141 ANIA_02271 ANIA_02417 ANIA_03619 ANIA_03753 ANIA_04552 ANIA_04797 ANIA_07423 ANIA_07714 ANIA_07753
0.00399583	36	72	1.6839	Nuclear envelope	http://amigo.geneontology.org/amigo/term/GO:0005635	ANIA_00084 ANIA_00576 ANIA_00676 ANIA_00906 ANIA_01056 ANIA_01190 ANIA_01238 ANIA_01296 ANIA_02085 ANIA_02086 ANIA_02142 ANIA_02164 ANIA_02431 ANIA_03422 ANIA_03454 ANIA_03719 ANIA_04293 ANIA_04862 ANIA_04942 ANIA_05627 ANIA_05717 ANIA_05889 ANIA_06006 ANIA_06143 ANIA_06591 ANIA_06689 ANIA_06734 ANIA_06738 ANIA_06868 ANIA_06980 ANIA_07731 ANIA_08787 ANIA_08862 ANIA_10002 ANIA_10112 ANIA_10754
0.00399744	14	20	2.35746	Nucleobase-containing small molecule biosynthetic process	http://amigo.geneontology.org/amigo/term/GO:0034404	ANIA_00662 ANIA_02494 ANIA_03222 ANIA_04382 ANIA_04561 ANIA_05492 ANIA_05884 ANIA_07108 ANIA_07502 ANIA_08214 ANIA_08847 ANIA_08869 ANIA_09083 ANIA_10230
0.00399744	14	20	2.35746	Vesicle-mediated transport to the plasma membrane	http://amigo.geneontology.org/amigo/term/GO:0098876	ANIA_00462 ANIA_01002 ANIA_03015 ANIA_03098 ANIA_03122 ANIA_04014 ANIA_05705 ANIA_06112 ANIA_06493 ANIA_08710 ANIA_08879 ANIA_10061 ANIA_10594 ANIA_11007
0.00399744	14	20	2.35746	Structural constituent of nuclear pore	http://amigo.geneontology.org/amigo/term/GO:0017056	ANIA_01190 ANIA_01238 ANIA_02086 ANIA_02431 ANIA_03454 ANIA_04293 ANIA_05627 ANIA_05889 ANIA_06143 ANIA_06689 ANIA_06738 ANIA_06980 ANIA_10002 ANIA_10112
0.00399744	14	20	2.35746	Nucleoside biosynthetic process	http://amigo.geneontology.org/amigo/term/GO:0009163	ANIA_00662 ANIA_02494 ANIA_03222 ANIA_04382 ANIA_04561 ANIA_05492 ANIA_05884 ANIA_07108 ANIA_07502 ANIA_08214 ANIA_08847 ANIA_08869 ANIA_09083 ANIA_10230
0.0040798	30	57	1.77252	Microtubule	http://amigo.geneontology.org/amigo/term/GO:0005874	ANIA_00108 ANIA_00143 ANIA_00641 ANIA_00676 ANIA_01005 ANIA_01056 ANIA_01182 ANIA_01398 ANIA_02759 ANIA_02862 ANIA_03547 ANIA_03710 ANIA_03724 ANIA_03970 ANIA_04867 ANIA_04961 ANIA_05116 ANIA_05181 ANIA_05343 ANIA_05521 ANIA_05531 ANIA_05815 ANIA_05873 ANIA_06863 ANIA_06875 ANIA_08286 ANIA_08322 ANIA_08457 ANIA_09426 ANIA_10448
0.00410516	13	18	2.4323	Positive regulation of cytoskeleton organization	http://amigo.geneontology.org/amigo/term/GO:0051495	ANIA_00184 ANIA_00306 ANIA_00410 ANIA_00673 ANIA_01306 ANIA_01398 ANIA_04919 ANIA_05778 ANIA_06341 ANIA_08065 ANIA_08698 ANIA_08863 ANIA_10942
0.00410516	13	18	2.4323	Mitotic DNA replication	http://amigo.geneontology.org/amigo/term/GO:1902969	ANIA_00872 ANIA_01237 ANIA_02491 ANIA_03040 ANIA_03067 ANIA_03450 ANIA_03619 ANIA_05901 ANIA_06069 ANIA_07325 ANIA_07423 ANIA_10497 ANIA_10755
0.00428503	61	139	1.47795	Protein kinase activity	http://amigo.geneontology.org/amigo/term/GO:0004672	ANIA_00038 ANIA_00106 ANIA_00124 ANIA_00576 ANIA_00699 ANIA_00822 ANIA_01171 ANIA_01326 ANIA_01485 ANIA_01665 ANIA_01800 ANIA_01867 ANIA_02246 ANIA_02363 ANIA_02412 ANIA_02513 ANIA_03065 ANIA_03214 ANIA_03422 ANIA_03450 ANIA_03719 ANIA_03946 ANIA_04182 ANIA_04196 ANIA_04279 ANIA_04322 ANIA_04385 ANIA_04447 ANIA_04717 ANIA_05494 ANIA_05529 ANIA_05666 ANIA_05674 ANIA_05708 ANIA_05757 ANIA_05815 ANI…
0.00435307	25	45	1.871	Ribonucleoprotein granule	http://amigo.geneontology.org/amigo/term/GO:0035770	ANIA_01055 ANIA_01325 ANIA_02065 ANIA_02482 ANIA_03411 ANIA_04000 ANIA_04965 ANIA_04967 ANIA_05154 ANIA_05529 ANIA_05898 ANIA_06199 ANIA_06711 ANIA_07480 ANIA_07492 ANIA_07628 ANIA_07746 ANIA_08853 ANIA_10119 ANIA_10121 ANIA_10164 ANIA_10362 ANIA_10417 ANIA_10963 ANIA_11052
0.00435307	25	45	1.871	Cytoplasmic ribonucleoprotein granule	http://amigo.geneontology.org/amigo/term/GO:0036464	ANIA_01055 ANIA_01325 ANIA_02065 ANIA_02482 ANIA_03411 ANIA_04000 ANIA_04965 ANIA_04967 ANIA_05154 ANIA_05529 ANIA_05898 ANIA_06199 ANIA_06711 ANIA_07480 ANIA_07492 ANIA_07628 ANIA_07746 ANIA_08853 ANIA_10119 ANIA_10121 ANIA_10164 ANIA_10362 ANIA_10417 ANIA_10963 ANIA_11052
0.00435307	25	46	1.871	Actin binding	http://amigo.geneontology.org/amigo/term/GO:0003779	ANIA_00184 ANIA_00306 ANIA_00317 ANIA_00673 ANIA_01023 ANIA_01306 ANIA_01462 ANIA_02126 ANIA_02484 ANIA_02756 ANIA_04168 ANIA_04270 ANIA_04919 ANIA_05686 ANIA_05778 ANIA_06341 ANIA_06911 ANIA_07707 ANIA_08065 ANIA_08496 ANIA_08698 ANIA_08862 ANIA_09463 ANIA_10288 ANIA_10942
0.00455546	45	99	1.57865	RNA catabolic process	http://amigo.geneontology.org/amigo/term/GO:0006401	ANIA_00258 ANIA_00434 ANIA_00505 ANIA_00632 ANIA_00646 ANIA_00767 ANIA_01976 ANIA_02065 ANIA_02080 ANIA_02153 ANIA_02252 ANIA_02271 ANIA_02764 ANIA_03014 ANIA_03411 ANIA_03657 ANIA_03739 ANIA_03812 ANIA_04000 ANIA_04530 ANIA_04546 ANIA_04958 ANIA_04965 ANIA_05114 ANIA_05154 ANIA_05188 ANIA_05898 ANIA_06007 ANIA_06199 ANIA_06514 ANIA_06587 ANIA_06600 ANIA_06695 ANIA_07492 ANIA_07493 ANIA_07628 ANI…
0.00470657	92	227	1.36492	Intracellular signal transduction	http://amigo.geneontology.org/amigo/term/GO:0035556	ANIA_00038 ANIA_00106 ANIA_00163 ANIA_00410 ANIA_00439 ANIA_00449 ANIA_00504 ANIA_00556 ANIA_00575 ANIA_00676 ANIA_00822 ANIA_00847 ANIA_00953 ANIA_01171 ANIA_01207 ANIA_01545 ANIA_01800 ANIA_01867 ANIA_02130 ANIA_02222 ANIA_02246 ANIA_02363 ANIA_02412 ANIA_02439 ANIA_02947 ANIA_02969 ANIA_03040 ANIA_03065 ANIA_03095 ANIA_03118 ANIA_03159 ANIA_03214 ANIA_03422 ANIA_03450 ANIA_03619 ANIA_03688 ANI…
0.00475497	33	65	1.7098	Peptidase complex	http://amigo.geneontology.org/amigo/term/GO:1905368	ANIA_00154 ANIA_00668 ANIA_00719 ANIA_01167 ANIA_01757 ANIA_01775 ANIA_02085 ANIA_02769 ANIA_03493 ANIA_03716 ANIA_03756 ANIA_03826 ANIA_03932 ANIA_04236 ANIA_04449 ANIA_04457 ANIA_04492 ANIA_04731 ANIA_04775 ANIA_04869 ANIA_05121 ANIA_05774 ANIA_05793 ANIA_05872 ANIA_06547 ANIA_06726 ANIA_07579 ANIA_08054 ANIA_10020 ANIA_10439 ANIA_10519 ANIA_10639 ANIA_10763
0.0049771	18	29	2.09036	Positive regulation of kinase activity	http://amigo.geneontology.org/amigo/term/GO:0033674	ANIA_01668 ANIA_01779 ANIA_02172 ANIA_02211 ANIA_03095 ANIA_03422 ANIA_04066 ANIA_04385 ANIA_04571 ANIA_05674 ANIA_05719 ANIA_06339 ANIA_06360 ANIA_08836 ANIA_09424 ANIA_10682 ANIA_10734 ANIA_11032
0.00500884	38	79	1.64072	Regulation of phosphate metabolic process	http://amigo.geneontology.org/amigo/term/GO:0019220	ANIA_00120 ANIA_00410 ANIA_00504 ANIA_01272 ANIA_01400 ANIA_01545 ANIA_01668 ANIA_01669 ANIA_01779 ANIA_02172 ANIA_02211 ANIA_03095 ANIA_03422 ANIA_03625 ANIA_03905 ANIA_04066 ANIA_04085 ANIA_04163 ANIA_04385 ANIA_04571 ANIA_05674 ANIA_05708 ANIA_05719 ANIA_05814 ANIA_06339 ANIA_06360 ANIA_08079 ANIA_08173 ANIA_08836 ANIA_09095 ANIA_09424 ANIA_09467 ANIA_10682 ANIA_10734 ANIA_10741 ANIA_10756 ANI…
0.00500884	38	79	1.64072	Regulation of phosphorus metabolic process	http://amigo.geneontology.org/amigo/term/GO:0051174	ANIA_00120 ANIA_00410 ANIA_00504 ANIA_01272 ANIA_01400 ANIA_01545 ANIA_01668 ANIA_01669 ANIA_01779 ANIA_02172 ANIA_02211 ANIA_03095 ANIA_03422 ANIA_03625 ANIA_03905 ANIA_04066 ANIA_04085 ANIA_04163 ANIA_04385 ANIA_04571 ANIA_05674 ANIA_05708 ANIA_05719 ANIA_05814 ANIA_06339 ANIA_06360 ANIA_08079 ANIA_08173 ANIA_08836 ANIA_09095 ANIA_09424 ANIA_09467 ANIA_10682 ANIA_10734 ANIA_10741 ANIA_10756 ANI…
0.00505743	81	197	1.39179	Vesicle	http://amigo.geneontology.org/amigo/term/GO:0031982	ANIA_00088 ANIA_00127 ANIA_00244 ANIA_00255 ANIA_00256 ANIA_00261 ANIA_00317 ANIA_00347 ANIA_00551 ANIA_00575 ANIA_00576 ANIA_00706 ANIA_01023 ANIA_01038 ANIA_01177 ANIA_01248 ANIA_01293 ANIA_01462 ANIA_01638 ANIA_02066 ANIA_02093 ANIA_02094 ANIA_02288 ANIA_02418 ANIA_02521 ANIA_02736 ANIA_02756 ANIA_03015 ANIA_03100 ANIA_03122 ANIA_03144 ANIA_03171 ANIA_03188 ANIA_03584 ANIA_03594 ANIA_03720 ANI…
0.00527978	21	36	1.96455	Positive regulation of cellular component biogenesis	http://amigo.geneontology.org/amigo/term/GO:0044089	ANIA_00184 ANIA_00306 ANIA_00673 ANIA_01306 ANIA_01398 ANIA_01545 ANIA_03411 ANIA_04236 ANIA_04919 ANIA_05102 ANIA_05778 ANIA_06288 ANIA_06341 ANIA_06687 ANIA_08065 ANIA_08698 ANIA_08863 ANIA_09467 ANIA_10119 ANIA_10121 ANIA_10956
0.00527978	21	38	1.96455	Cortical actin cytoskeleton	http://amigo.geneontology.org/amigo/term/GO:0030864	ANIA_00184 ANIA_00317 ANIA_00605 ANIA_00673 ANIA_01023 ANIA_01462 ANIA_02756 ANIA_03815 ANIA_04085 ANIA_04168 ANIA_04270 ANIA_04463 ANIA_05686 ANIA_05778 ANIA_06341 ANIA_07707 ANIA_08698 ANIA_08820 ANIA_09463 ANIA_10288 ANIA_10942
0.00527978	21	36	1.96455	TRNA aminoacylation for protein translation	http://amigo.geneontology.org/amigo/term/GO:0006418	ANIA_00705 ANIA_01201 ANIA_01380 ANIA_01913 ANIA_02150 ANIA_03702 ANIA_03824 ANIA_04086 ANIA_04550 ANIA_06488 ANIA_07361 ANIA_07479 ANIA_08224 ANIA_08800 ANIA_08867 ANIA_09419 ANIA_10195 ANIA_10353 ANIA_10474 ANIA_10475 ANIA_11125
0.00531974	47	104	1.55183	Cellular response to nutrient	http://amigo.geneontology.org/amigo/term/GO:0031670	ANIA_00388 ANIA_00554 ANIA_00568 ANIA_00671 ANIA_01406 ANIA_01812 ANIA_02955 ANIA_03217 ANIA_03269 ANIA_03280 ANIA_03300 ANIA_03502 ANIA_03683 ANIA_03684 ANIA_03986 ANIA_04001 ANIA_04166 ANIA_04489 ANIA_04750 ANIA_04785 ANIA_04821 ANIA_04837 ANIA_06293 ANIA_06832 ANIA_06846 ANIA_07189 ANIA_07468 ANIA_07951 ANIA_07971 ANIA_08164 ANIA_08168 ANIA_08355 ANIA_08369 ANIA_08506 ANIA_08732 ANIA_08885 ANI…
0.00560005	32	64	1.71063	Polymeric cytoskeletal fiber	http://amigo.geneontology.org/amigo/term/GO:0099513	ANIA_00108 ANIA_00143 ANIA_00641 ANIA_00676 ANIA_01005 ANIA_01056 ANIA_01182 ANIA_01398 ANIA_02759 ANIA_02862 ANIA_03547 ANIA_03710 ANIA_03724 ANIA_03970 ANIA_04867 ANIA_04961 ANIA_05116 ANIA_05181 ANIA_05343 ANIA_05521 ANIA_05531 ANIA_05686 ANIA_05815 ANIA_05873 ANIA_06863 ANIA_06875 ANIA_08286 ANIA_08322 ANIA_08457 ANIA_08862 ANIA_09426 ANIA_10448
0.00625473	40	84	1.60371	Macromolecule methylation	http://amigo.geneontology.org/amigo/term/GO:0043414	ANIA_00065 ANIA_00128 ANIA_00130 ANIA_00134 ANIA_00685 ANIA_00690 ANIA_01191 ANIA_01751 ANIA_01905 ANIA_02190 ANIA_02759 ANIA_03038 ANIA_03096 ANIA_04543 ANIA_04764 ANIA_05119 ANIA_05789 ANIA_05795 ANIA_06072 ANIA_06162 ANIA_06349 ANIA_06522 ANIA_06568 ANIA_07490 ANIA_08066 ANIA_08721 ANIA_08799 ANIA_08825 ANIA_08849 ANIA_09399 ANIA_09438 ANIA_10189 ANIA_10212 ANIA_10239 ANIA_10282 ANIA_10450 ANI…
0.00645184	8	9	2.9936	Protein deneddylation	http://amigo.geneontology.org/amigo/term/GO:0000338	ANIA_01491 ANIA_01539 ANIA_02129 ANIA_02233 ANIA_03623 ANIA_04783 ANIA_05798 ANIA_10456
0.00669773	38	79	1.61995	DNA conformation change	http://amigo.geneontology.org/amigo/term/GO:0071103	ANIA_00327 ANIA_00424 ANIA_01191 ANIA_01286 ANIA_01729 ANIA_02087 ANIA_02491 ANIA_02765 ANIA_03067 ANIA_03123 ANIA_03451 ANIA_03619 ANIA_03797 ANIA_03940 ANIA_04399 ANIA_04432 ANIA_04552 ANIA_04555 ANIA_04597 ANIA_05092 ANIA_05102 ANIA_05278 ANIA_05406 ANIA_05617 ANIA_05899 ANIA_05901 ANIA_05992 ANIA_06505 ANIA_07423 ANIA_07499 ANIA_08863 ANIA_09436 ANIA_10043 ANIA_10414 ANIA_10497 ANIA_10757 ANI…
0.00675943	163	446	1.24762	Establishment of localization in cell	http://amigo.geneontology.org/amigo/term/GO:0051649	ANIA_00068 ANIA_00084 ANIA_00095 ANIA_00124 ANIA_00143 ANIA_00165 ANIA_00244 ANIA_00255 ANIA_00261 ANIA_00317 ANIA_00434 ANIA_00576 ANIA_00706 ANIA_00878 ANIA_00901 ANIA_00906 ANIA_01023 ANIA_01038 ANIA_01056 ANIA_01177 ANIA_01182 ANIA_01190 ANIA_01223 ANIA_01238 ANIA_01272 ANIA_01283 ANIA_01293 ANIA_01326 ANIA_01398 ANIA_01401 ANIA_01462 ANIA_01629 ANIA_01638 ANIA_01711 ANIA_01796 ANIA_01845 ANI…
0.00676484	29	56	1.74404	Regulation of transcription from RNA polymerase II promoter by a nonfermentable carbon source	http://amigo.geneontology.org/amigo/term/GO:0061413	ANIA_00388 ANIA_00568 ANIA_03280 ANIA_03300 ANIA_03502 ANIA_03683 ANIA_03684 ANIA_03986 ANIA_04001 ANIA_04750 ANIA_04821 ANIA_04837 ANIA_07189 ANIA_07971 ANIA_08164 ANIA_08355 ANIA_08506 ANIA_08732 ANIA_08885 ANIA_08978 ANIA_09292 ANIA_09458 ANIA_10423 ANIA_10504 ANIA_10550 ANIA_10638 ANIA_10976 ANIA_11093 ANIA_11098
0.00676484	29	56	1.74404	Positive regulation of transcription from RNA polymerase II promoter by a nonfermentable carbon source	http://amigo.geneontology.org/amigo/term/GO:0061414	ANIA_00388 ANIA_00568 ANIA_03280 ANIA_03300 ANIA_03502 ANIA_03683 ANIA_03684 ANIA_03986 ANIA_04001 ANIA_04750 ANIA_04821 ANIA_04837 ANIA_07189 ANIA_07971 ANIA_08164 ANIA_08355 ANIA_08506 ANIA_08732 ANIA_08885 ANIA_08978 ANIA_09292 ANIA_09458 ANIA_10423 ANIA_10504 ANIA_10550 ANIA_10638 ANIA_10976 ANIA_11093 ANIA_11098
0.00680644	47	105	1.53676	Response to nutrient	http://amigo.geneontology.org/amigo/term/GO:0007584	ANIA_00388 ANIA_00554 ANIA_00568 ANIA_00671 ANIA_01406 ANIA_01812 ANIA_02955 ANIA_03217 ANIA_03269 ANIA_03280 ANIA_03300 ANIA_03502 ANIA_03683 ANIA_03684 ANIA_03986 ANIA_04001 ANIA_04166 ANIA_04489 ANIA_04750 ANIA_04785 ANIA_04821 ANIA_04837 ANIA_06293 ANIA_06832 ANIA_06846 ANIA_07189 ANIA_07468 ANIA_07951 ANIA_07971 ANIA_08164 ANIA_08168 ANIA_08355 ANIA_08369 ANIA_08506 ANIA_08732 ANIA_08885 ANI…
0.00693786	182	504	1.2308	Cellular amide metabolic process	http://amigo.geneontology.org/amigo/term/GO:0043603	ANIA_00009 ANIA_00106 ANIA_00167 ANIA_00232 ANIA_00256 ANIA_00278 ANIA_00418 ANIA_00504 ANIA_00505 ANIA_00554 ANIA_00565 ANIA_00641 ANIA_00705 ANIA_00720 ANIA_00807 ANIA_00868 ANIA_00872 ANIA_00907 ANIA_00918 ANIA_00978 ANIA_01080 ANIA_01122 ANIA_01166 ANIA_01201 ANIA_01228 ANIA_01344 ANIA_01380 ANIA_01480 ANIA_01494 ANIA_01638 ANIA_01665 ANIA_01751 ANIA_01913 ANIA_01967 ANIA_02063 ANIA_02065 ANI…
0.00700057	22	39	1.89978	TRNA aminoacylation	http://amigo.geneontology.org/amigo/term/GO:0043039	ANIA_00705 ANIA_01201 ANIA_01380 ANIA_01913 ANIA_02150 ANIA_03702 ANIA_03824 ANIA_04086 ANIA_04550 ANIA_06488 ANIA_07361 ANIA_07479 ANIA_08224 ANIA_08653 ANIA_08800 ANIA_08867 ANIA_09419 ANIA_10195 ANIA_10353 ANIA_10474 ANIA_10475 ANIA_11125
0.00700057	22	40	1.89978	Regulation of RNA stability	http://amigo.geneontology.org/amigo/term/GO:0043487	ANIA_01976 ANIA_02065 ANIA_02080 ANIA_02271 ANIA_03739 ANIA_04000 ANIA_04546 ANIA_04965 ANIA_05898 ANIA_06199 ANIA_06587 ANIA_06695 ANIA_07492 ANIA_07628 ANIA_07714 ANIA_07746 ANIA_09090 ANIA_10119 ANIA_10121 ANIA_10164 ANIA_10362 ANIA_10406
0.00700057	15	23	2.19639	Ribosome binding	http://amigo.geneontology.org/amigo/term/GO:0043022	ANIA_02775 ANIA_03055 ANIA_03096 ANIA_03156 ANIA_04015 ANIA_04163 ANIA_04530 ANIA_06330 ANIA_07721 ANIA_08173 ANIA_08824 ANIA_08883 ANIA_10170 ANIA_10315 ANIA_10734
0.00706498	19	34	1.99963	Ubiquitin mediated proteolysis	http://www.genome.jp/kegg-bin/show_pathway?ani04120	ANIA_00482 ANIA_00596 ANIA_00905 ANIA_00911 ANIA_01746 ANIA_02298 ANIA_02302 ANIA_02416 ANIA_02450 ANIA_02761 ANIA_03999 ANIA_04735 ANIA_05495 ANIA_05593 ANIA_06217 ANIA_06894 ANIA_07338 ANIA_08013 ANIA_08258
0.00706498	19	32	1.99963	Ribonucleoside monophosphate metabolic process	http://amigo.geneontology.org/amigo/term/GO:0009161	ANIA_00495 ANIA_00565 ANIA_00893 ANIA_00919 ANIA_01965 ANIA_05884 ANIA_05904 ANIA_06078 ANIA_06157 ANIA_06209 ANIA_06541 ANIA_06711 ANIA_07469 ANIA_07502 ANIA_08121 ANIA_08872 ANIA_09083 ANIA_10131 ANIA_10753
0.00731054	34	71	1.65949	Cytoplasmic translation	http://amigo.geneontology.org/amigo/term/GO:0002181	ANIA_00278 ANIA_00720 ANIA_00978 ANIA_01166 ANIA_01751 ANIA_02080 ANIA_02244 ANIA_02482 ANIA_02734 ANIA_02907 ANIA_02980 ANIA_03055 ANIA_03156 ANIA_03172 ANIA_03411 ANIA_03646 ANIA_04080 ANIA_04259 ANIA_04470 ANIA_04594 ANIA_04742 ANIA_04937 ANIA_05014 ANIA_05179 ANIA_05719 ANIA_05745 ANIA_06283 ANIA_08853 ANIA_08883 ANIA_09093 ANIA_10139 ANIA_10175 ANIA_10248 ANIA_10459
0.0074159	93	238	1.34423	Sequence-specific double-stranded DNA binding	http://amigo.geneontology.org/amigo/term/GO:1990837	ANIA_00148 ANIA_00388 ANIA_00568 ANIA_00671 ANIA_00680 ANIA_00872 ANIA_01028 ANIA_01152 ANIA_01207 ANIA_01259 ANIA_01265 ANIA_01391 ANIA_01435 ANIA_01494 ANIA_01584 ANIA_01599 ANIA_01812 ANIA_01905 ANIA_01929 ANIA_02270 ANIA_02491 ANIA_02652 ANIA_02826 ANIA_02955 ANIA_03040 ANIA_03050 ANIA_03075 ANIA_03217 ANIA_03269 ANIA_03280 ANIA_03300 ANIA_03502 ANIA_03607 ANIA_03667 ANIA_03683 ANIA_03684 ANI…
0.00752505	24	44	1.83698	Macroautophagy	http://amigo.geneontology.org/amigo/term/GO:0016236	ANIA_00127 ANIA_00405 ANIA_00439 ANIA_00576 ANIA_01545 ANIA_01867 ANIA_02280 ANIA_02887 ANIA_04278 ANIA_04709 ANIA_04832 ANIA_05174 ANIA_05982 ANIA_06360 ANIA_07428 ANIA_07464 ANIA_07602 ANIA_08874 ANIA_09467 ANIA_10171 ANIA_10213 ANIA_10956 ANIA_11004 ANIA_12408
0.00752938	32	65	1.6839	Supramolecular polymer	http://amigo.geneontology.org/amigo/term/GO:0099081	ANIA_00108 ANIA_00143 ANIA_00641 ANIA_00676 ANIA_01005 ANIA_01056 ANIA_01182 ANIA_01398 ANIA_02759 ANIA_02862 ANIA_03547 ANIA_03710 ANIA_03724 ANIA_03970 ANIA_04867 ANIA_04961 ANIA_05116 ANIA_05181 ANIA_05343 ANIA_05521 ANIA_05531 ANIA_05686 ANIA_05815 ANIA_05873 ANIA_06863 ANIA_06875 ANIA_08286 ANIA_08322 ANIA_08457 ANIA_08862 ANIA_09426 ANIA_10448
0.00752938	32	65	1.6839	Supramolecular fiber	http://amigo.geneontology.org/amigo/term/GO:0099512	ANIA_00108 ANIA_00143 ANIA_00641 ANIA_00676 ANIA_01005 ANIA_01056 ANIA_01182 ANIA_01398 ANIA_02759 ANIA_02862 ANIA_03547 ANIA_03710 ANIA_03724 ANIA_03970 ANIA_04867 ANIA_04961 ANIA_05116 ANIA_05181 ANIA_05343 ANIA_05521 ANIA_05531 ANIA_05686 ANIA_05815 ANIA_05873 ANIA_06863 ANIA_06875 ANIA_08286 ANIA_08322 ANIA_08457 ANIA_08862 ANIA_09426 ANIA_10448
0.00752938	146	393	1.26076	Proteolysis	http://amigo.geneontology.org/amigo/term/GO:0006508	ANIA_00084 ANIA_00173 ANIA_00224 ANIA_00256 ANIA_00349 ANIA_00551 ANIA_00596 ANIA_00810 ANIA_00883 ANIA_00905 ANIA_00906 ANIA_00910 ANIA_00911 ANIA_01167 ANIA_01293 ANIA_01491 ANIA_01539 ANIA_01573 ANIA_01638 ANIA_01658 ANIA_01706 ANIA_01757 ANIA_01780 ANIA_01909 ANIA_02066 ANIA_02085 ANIA_02092 ANIA_02129 ANIA_02180 ANIA_02194 ANIA_02233 ANIA_02237 ANIA_02240 ANIA_02302 ANIA_02304 ANIA_02366 ANI…
0.00757504	14	23	2.2452	Proteasome	http://www.genome.jp/kegg-bin/show_pathway?ani03050	ANIA_01757 ANIA_02085 ANIA_03493 ANIA_03716 ANIA_03756 ANIA_03932 ANIA_04236 ANIA_04449 ANIA_04731 ANIA_04775 ANIA_05793 ANIA_05872 ANIA_06547 ANIA_06726
0.00769474	30	60	1.71244	Endosomal transport	http://amigo.geneontology.org/amigo/term/GO:0016197	ANIA_00095 ANIA_00255 ANIA_00317 ANIA_01023 ANIA_01038 ANIA_01272 ANIA_01283 ANIA_01293 ANIA_01462 ANIA_02066 ANIA_02736 ANIA_03015 ANIA_03594 ANIA_04014 ANIA_04270 ANIA_04709 ANIA_05632 ANIA_05710 ANIA_06112 ANIA_06289 ANIA_06546 ANIA_06598 ANIA_06911 ANIA_07602 ANIA_07993 ANIA_08868 ANIA_09356 ANIA_10129 ANIA_10594 ANIA_10918
0.00769474	30	59	1.71244	Chromosome, centromeric region	http://amigo.geneontology.org/amigo/term/GO:0000775	ANIA_00143 ANIA_00166 ANIA_00960 ANIA_01056 ANIA_01237 ANIA_01286 ANIA_01398 ANIA_01399 ANIA_01401 ANIA_01432 ANIA_01977 ANIA_02160 ANIA_02439 ANIA_02886 ANIA_03158 ANIA_03187 ANIA_03451 ANIA_03710 ANIA_04804 ANIA_04961 ANIA_05521 ANIA_06224 ANIA_06600 ANIA_07048 ANIA_08263 ANIA_08719 ANIA_08807 ANIA_09435 ANIA_09467 ANIA_10280
0.00774952	46	104	1.53385	Nuclear transport	http://amigo.geneontology.org/amigo/term/GO:0051169	ANIA_00084 ANIA_00124 ANIA_00434 ANIA_00906 ANIA_01190 ANIA_01223 ANIA_01238 ANIA_01326 ANIA_01401 ANIA_01711 ANIA_02086 ANIA_02142 ANIA_02164 ANIA_02271 ANIA_02431 ANIA_03012 ANIA_03172 ANIA_03454 ANIA_03651 ANIA_03657 ANIA_03739 ANIA_04293 ANIA_04862 ANIA_04942 ANIA_05627 ANIA_05717 ANIA_05789 ANIA_06006 ANIA_06143 ANIA_06175 ANIA_06331 ANIA_06591 ANIA_06734 ANIA_06738 ANIA_06980 ANIA_07013 ANI…
0.00774952	46	104	1.53385	Nucleocytoplasmic transport	http://amigo.geneontology.org/amigo/term/GO:0006913	ANIA_00084 ANIA_00124 ANIA_00434 ANIA_00906 ANIA_01190 ANIA_01223 ANIA_01238 ANIA_01326 ANIA_01401 ANIA_01711 ANIA_02086 ANIA_02142 ANIA_02164 ANIA_02271 ANIA_02431 ANIA_03012 ANIA_03172 ANIA_03454 ANIA_03651 ANIA_03657 ANIA_03739 ANIA_04293 ANIA_04862 ANIA_04942 ANIA_05627 ANIA_05717 ANIA_05789 ANIA_06006 ANIA_06143 ANIA_06175 ANIA_06331 ANIA_06591 ANIA_06734 ANIA_06738 ANIA_06980 ANIA_07013 ANI…
0.00789414	9	13	2.75547	Homologous recombination	http://www.genome.jp/kegg-bin/show_pathway?ani03440	ANIA_00556 ANIA_00582 ANIA_02087 ANIA_02446 ANIA_03118 ANIA_03619 ANIA_04555 ANIA_06878 ANIA_07308
0.00789864	18	30	2.02068	DNA geometric change	http://amigo.geneontology.org/amigo/term/GO:0032392	ANIA_00327 ANIA_02087 ANIA_02491 ANIA_03619 ANIA_03797 ANIA_03940 ANIA_04432 ANIA_04552 ANIA_05092 ANIA_05278 ANIA_05617 ANIA_05901 ANIA_05992 ANIA_07423 ANIA_09436 ANIA_10414 ANIA_10497 ANIA_10757
0.00789864	18	30	2.02068	DNA duplex unwinding	http://amigo.geneontology.org/amigo/term/GO:0032508	ANIA_00327 ANIA_02087 ANIA_02491 ANIA_03619 ANIA_03797 ANIA_03940 ANIA_04432 ANIA_04552 ANIA_05092 ANIA_05278 ANIA_05617 ANIA_05901 ANIA_05992 ANIA_07423 ANIA_09436 ANIA_10414 ANIA_10497 ANIA_10757
0.00789864	21	37	1.91145	Aminoacyl-tRNA ligase activity	http://amigo.geneontology.org/amigo/term/GO:0004812	ANIA_00705 ANIA_01201 ANIA_01380 ANIA_01913 ANIA_02150 ANIA_03702 ANIA_03824 ANIA_04086 ANIA_04550 ANIA_06488 ANIA_07361 ANIA_07479 ANIA_08224 ANIA_08800 ANIA_08867 ANIA_09419 ANIA_10195 ANIA_10353 ANIA_10474 ANIA_10475 ANIA_11125
0.00789864	21	37	1.91145	Ligase activity, forming carbon-oxygen bonds	http://amigo.geneontology.org/amigo/term/GO:0016875	ANIA_00705 ANIA_01201 ANIA_01380 ANIA_01913 ANIA_02150 ANIA_03702 ANIA_03824 ANIA_04086 ANIA_04550 ANIA_06488 ANIA_07361 ANIA_07479 ANIA_08224 ANIA_08800 ANIA_08867 ANIA_09419 ANIA_10195 ANIA_10353 ANIA_10474 ANIA_10475 ANIA_11125
0.00789864	18	31	2.02068	Peptide binding	http://amigo.geneontology.org/amigo/term/GO:0042277	ANIA_00906 ANIA_01638 ANIA_02086 ANIA_02142 ANIA_02431 ANIA_04043 ANIA_04282 ANIA_04580 ANIA_04583 ANIA_05627 ANIA_05717 ANIA_05812 ANIA_06734 ANIA_07721 ANIA_07731 ANIA_08246 ANIA_08605 ANIA_10215
0.00799754	13	21	2.30428	DNA-dependent DNA replication maintenance of fidelity	http://amigo.geneontology.org/amigo/term/GO:0045005	ANIA_00410 ANIA_01237 ANIA_03067 ANIA_03118 ANIA_03450 ANIA_03619 ANIA_04752 ANIA_05494 ANIA_06261 ANIA_06878 ANIA_07325 ANIA_10414 ANIA_10956
0.00799754	349	1035	1.15231	Catabolic process	http://amigo.geneontology.org/amigo/term/GO:0009056	ANIA_00034 ANIA_00084 ANIA_00127 ANIA_00179 ANIA_00221 ANIA_00232 ANIA_00258 ANIA_00299 ANIA_00349 ANIA_00383 ANIA_00388 ANIA_00405 ANIA_00418 ANIA_00423 ANIA_00434 ANIA_00439 ANIA_00472 ANIA_00505 ANIA_00551 ANIA_00554 ANIA_00576 ANIA_00593 ANIA_00596 ANIA_00632 ANIA_00646 ANIA_00662 ANIA_00712 ANIA_00763 ANIA_00767 ANIA_00774 ANIA_00810 ANIA_00868 ANIA_00883 ANIA_00891 ANIA_00905 ANIA_00911 ANI…
0.00835209	44	99	1.54357	Cell cortex	http://amigo.geneontology.org/amigo/term/GO:0005938	ANIA_00184 ANIA_00317 ANIA_00462 ANIA_00594 ANIA_00605 ANIA_00673 ANIA_00822 ANIA_01002 ANIA_01023 ANIA_01191 ANIA_01394 ANIA_01462 ANIA_02484 ANIA_02658 ANIA_02756 ANIA_03090 ANIA_03171 ANIA_03807 ANIA_03815 ANIA_04085 ANIA_04168 ANIA_04270 ANIA_04463 ANIA_04998 ANIA_05529 ANIA_05686 ANIA_05778 ANIA_06150 ANIA_06288 ANIA_06341 ANIA_06493 ANIA_07707 ANIA_08182 ANIA_08270 ANIA_08698 ANIA_08820 ANI…
0.00845509	12	17	2.37727	Negative regulation of G2/M transition of mitotic cell cycle	http://amigo.geneontology.org/amigo/term/GO:0010972	ANIA_00556 ANIA_01207 ANIA_01545 ANIA_02969 ANIA_03040 ANIA_03118 ANIA_03450 ANIA_04571 ANIA_05494 ANIA_06616 ANIA_08876 ANIA_10434
0.00845509	12	17	2.37727	Negative regulation of cell cycle G2/M phase transition	http://amigo.geneontology.org/amigo/term/GO:1902750	ANIA_00556 ANIA_01207 ANIA_01545 ANIA_02969 ANIA_03040 ANIA_03118 ANIA_03450 ANIA_04571 ANIA_05494 ANIA_06616 ANIA_08876 ANIA_10434
0.00845509	12	17	2.37727	Positive regulation of supramolecular fiber organization	http://amigo.geneontology.org/amigo/term/GO:1902905	ANIA_00184 ANIA_00306 ANIA_00673 ANIA_01306 ANIA_01398 ANIA_04919 ANIA_05778 ANIA_06341 ANIA_08065 ANIA_08698 ANIA_08863 ANIA_10942
0.00847934	10	13	2.59061	Ribonucleoside biosynthetic process	http://amigo.geneontology.org/amigo/term/GO:0042455	ANIA_00662 ANIA_02494 ANIA_03222 ANIA_04561 ANIA_05492 ANIA_05884 ANIA_08214 ANIA_08847 ANIA_09083 ANIA_10230
0.00847934	23	42	1.84427	Positive regulation of cell cycle	http://amigo.geneontology.org/amigo/term/GO:0045787	ANIA_00410 ANIA_00807 ANIA_00872 ANIA_00905 ANIA_01398 ANIA_01545 ANIA_01661 ANIA_01668 ANIA_01779 ANIA_02172 ANIA_02211 ANIA_03719 ANIA_04066 ANIA_04182 ANIA_04735 ANIA_05028 ANIA_05820 ANIA_06288 ANIA_06505 ANIA_07499 ANIA_08013 ANIA_09121 ANIA_09424
0.00859406	11	15	2.46972	Positive regulation of protein polymerization	http://amigo.geneontology.org/amigo/term/GO:0032273	ANIA_00184 ANIA_00306 ANIA_00673 ANIA_01306 ANIA_01398 ANIA_04919 ANIA_05778 ANIA_06341 ANIA_08065 ANIA_08698 ANIA_08863
0.00859406	11	15	2.46972	DNA polymerase complex	http://amigo.geneontology.org/amigo/term/GO:0042575	ANIA_00260 ANIA_02446 ANIA_03033 ANIA_03067 ANIA_04789 ANIA_06687 ANIA_07308 ANIA_07325 ANIA_07439 ANIA_10470 ANIA_10755
0.00859406	48	107	1.51079	Protein serine/threonine kinase activity	http://amigo.geneontology.org/amigo/term/GO:0004674	ANIA_00038 ANIA_00106 ANIA_00124 ANIA_00576 ANIA_00699 ANIA_00822 ANIA_01171 ANIA_01485 ANIA_01665 ANIA_01867 ANIA_02246 ANIA_02412 ANIA_02513 ANIA_03065 ANIA_03422 ANIA_03450 ANIA_03719 ANIA_04182 ANIA_04279 ANIA_04385 ANIA_04717 ANIA_05494 ANIA_05529 ANIA_05666 ANIA_05674 ANIA_05708 ANIA_05757 ANIA_05815 ANIA_05982 ANIA_06339 ANIA_06363 ANIA_06758 ANIA_06768 ANIA_06975 ANIA_07563 ANIA_08751 ANI…
0.00868398	36	77	1.61654	Supramolecular fiber organization	http://amigo.geneontology.org/amigo/term/GO:0097435	ANIA_00184 ANIA_00306 ANIA_00594 ANIA_00673 ANIA_00676 ANIA_01005 ANIA_01023 ANIA_01182 ANIA_01306 ANIA_01398 ANIA_01462 ANIA_02126 ANIA_02484 ANIA_02756 ANIA_03171 ANIA_04168 ANIA_04867 ANIA_04919 ANIA_05116 ANIA_05521 ANIA_05686 ANIA_05778 ANIA_05873 ANIA_06341 ANIA_07707 ANIA_08065 ANIA_08286 ANIA_08496 ANIA_08698 ANIA_08862 ANIA_08863 ANIA_08877 ANIA_09463 ANIA_10288 ANIA_10397 ANIA_10942
0.00875617	25	48	1.79138	Regulation of GTPase activity	http://amigo.geneontology.org/amigo/term/GO:0043087	ANIA_00084 ANIA_00108 ANIA_00261 ANIA_01025 ANIA_01038 ANIA_01545 ANIA_01629 ANIA_01661 ANIA_01931 ANIA_01980 ANIA_02222 ANIA_04274 ANIA_04537 ANIA_04862 ANIA_04890 ANIA_04998 ANIA_06033 ANIA_06533 ANIA_09086 ANIA_09413 ANIA_09463 ANIA_10754 ANIA_10826 ANIA_10882 ANIA_11010
0.00889201	17	28	2.04473	Positive regulation of protein phosphorylation	http://amigo.geneontology.org/amigo/term/GO:0001934	ANIA_01668 ANIA_01779 ANIA_02172 ANIA_02211 ANIA_03095 ANIA_03422 ANIA_04066 ANIA_04163 ANIA_04385 ANIA_04571 ANIA_05674 ANIA_05719 ANIA_06339 ANIA_06360 ANIA_08836 ANIA_09424 ANIA_11032
0.00901876	20	35	1.92446	Positive regulation of transferase activity	http://amigo.geneontology.org/amigo/term/GO:0051347	ANIA_00911 ANIA_01668 ANIA_01779 ANIA_02172 ANIA_02211 ANIA_03095 ANIA_03422 ANIA_04066 ANIA_04385 ANIA_04571 ANIA_05674 ANIA_05719 ANIA_06339 ANIA_06360 ANIA_07259 ANIA_08836 ANIA_09424 ANIA_10682 ANIA_10734 ANIA_11032
0.00901876	20	35	1.92446	Nuclear pore	http://amigo.geneontology.org/amigo/term/GO:0005643	ANIA_00084 ANIA_00576 ANIA_01190 ANIA_01238 ANIA_02086 ANIA_02142 ANIA_02431 ANIA_03454 ANIA_04293 ANIA_04942 ANIA_05627 ANIA_05889 ANIA_06143 ANIA_06689 ANIA_06738 ANIA_06980 ANIA_08787 ANIA_10002 ANIA_10112 ANIA_10754
0.00906883	91	234	1.33829	Negative regulation of metabolic process	http://amigo.geneontology.org/amigo/term/GO:0009892	ANIA_00119 ANIA_00410 ANIA_00434 ANIA_00486 ANIA_00505 ANIA_00565 ANIA_00632 ANIA_00646 ANIA_00671 ANIA_00767 ANIA_01132 ANIA_01191 ANIA_01272 ANIA_01286 ANIA_01400 ANIA_01669 ANIA_01708 ANIA_01812 ANIA_01867 ANIA_01976 ANIA_02021 ANIA_02065 ANIA_02080 ANIA_02141 ANIA_02153 ANIA_02252 ANIA_02270 ANIA_02271 ANIA_02304 ANIA_02765 ANIA_02955 ANIA_03067 ANIA_03411 ANIA_03450 ANIA_03578 ANIA_03580 ANI…
0.009141	34	72	1.63579	Carbon catabolite activation of transcription	http://amigo.geneontology.org/amigo/term/GO:0045991	ANIA_00388 ANIA_00554 ANIA_00568 ANIA_03217 ANIA_03269 ANIA_03280 ANIA_03300 ANIA_03502 ANIA_03683 ANIA_03684 ANIA_03986 ANIA_04001 ANIA_04750 ANIA_04785 ANIA_04821 ANIA_04837 ANIA_06832 ANIA_07189 ANIA_07971 ANIA_08164 ANIA_08355 ANIA_08506 ANIA_08732 ANIA_08885 ANIA_08978 ANIA_09292 ANIA_09458 ANIA_10423 ANIA_10504 ANIA_10550 ANIA_10638 ANIA_10976 ANIA_11093 ANIA_11098
0.00948155	6	6	3.3678	Protein phosphatase type 2A complex	http://amigo.geneontology.org/amigo/term/GO:0000159	ANIA_00504 ANIA_01545 ANIA_03905 ANIA_04085 ANIA_09467 ANIA_10111
0.00948501	76	186	1.37609	Ubiquitin-dependent protein catabolic process	http://amigo.geneontology.org/amigo/term/GO:0006511	ANIA_00084 ANIA_00551 ANIA_00596 ANIA_00810 ANIA_00883 ANIA_00905 ANIA_00911 ANIA_01167 ANIA_01293 ANIA_01658 ANIA_01757 ANIA_01909 ANIA_02066 ANIA_02085 ANIA_02240 ANIA_02302 ANIA_02304 ANIA_02413 ANIA_02761 ANIA_02961 ANIA_03450 ANIA_03453 ANIA_03493 ANIA_03711 ANIA_03716 ANIA_03733 ANIA_03756 ANIA_03932 ANIA_03939 ANIA_03999 ANIA_04037 ANIA_04236 ANIA_04441 ANIA_04449 ANIA_04457 ANIA_04492 ANI…
0.00953607	43	94	1.54059	S-adenosylmethionine-dependent methyltransferase activity	http://amigo.geneontology.org/amigo/term/GO:0008757	ANIA_00065 ANIA_00128 ANIA_00130 ANIA_00134 ANIA_00685 ANIA_00690 ANIA_00720 ANIA_00865 ANIA_01614 ANIA_02190 ANIA_02759 ANIA_03038 ANIA_03096 ANIA_03378 ANIA_03600 ANIA_04543 ANIA_04625 ANIA_04764 ANIA_04774 ANIA_05688 ANIA_05789 ANIA_05795 ANIA_06072 ANIA_06094 ANIA_06162 ANIA_06568 ANIA_07490 ANIA_08066 ANIA_08531 ANIA_08799 ANIA_08825 ANIA_08849 ANIA_09399 ANIA_09438 ANIA_10189 ANIA_10212 ANI…
0.00959524	40	86	1.56642	Translation regulator activity	http://amigo.geneontology.org/amigo/term/GO:0045182	ANIA_00138 ANIA_00167 ANIA_00872 ANIA_00978 ANIA_01080 ANIA_01344 ANIA_01494 ANIA_01665 ANIA_02063 ANIA_02080 ANIA_02246 ANIA_02769 ANIA_02775 ANIA_02907 ANIA_03055 ANIA_03156 ANIA_03411 ANIA_03462 ANIA_04015 ANIA_04038 ANIA_04218 ANIA_04259 ANIA_04470 ANIA_04742 ANIA_05745 ANIA_06330 ANIA_06700 ANIA_06864 ANIA_08066 ANIA_08824 ANIA_08853 ANIA_08883 ANIA_09065 ANIA_09093 ANIA_09304 ANIA_10139 ANI…
0.00997969	132	354	1.26652	Cellular macromolecule catabolic process	http://amigo.geneontology.org/amigo/term/GO:0044265	ANIA_00084 ANIA_00258 ANIA_00434 ANIA_00505 ANIA_00551 ANIA_00596 ANIA_00632 ANIA_00646 ANIA_00767 ANIA_00810 ANIA_00883 ANIA_00905 ANIA_00911 ANIA_01167 ANIA_01293 ANIA_01658 ANIA_01742 ANIA_01757 ANIA_01909 ANIA_01976 ANIA_02065 ANIA_02066 ANIA_02080 ANIA_02085 ANIA_02153 ANIA_02237 ANIA_02240 ANIA_02252 ANIA_02271 ANIA_02302 ANIA_02304 ANIA_02413 ANIA_02761 ANIA_02764 ANIA_02961 ANIA_02972 ANI…
0.0100772	16	26	2.07249	Autophagosome assembly	http://amigo.geneontology.org/amigo/term/GO:0000045	ANIA_00127 ANIA_00405 ANIA_00439 ANIA_01545 ANIA_02280 ANIA_02887 ANIA_04709 ANIA_04832 ANIA_05174 ANIA_06360 ANIA_07428 ANIA_07602 ANIA_09467 ANIA_10171 ANIA_10213 ANIA_11004
0.0100772	16	26	2.07249	Autophagosome organization	http://amigo.geneontology.org/amigo/term/GO:1905037	ANIA_00127 ANIA_00405 ANIA_00439 ANIA_01545 ANIA_02280 ANIA_02887 ANIA_04709 ANIA_04832 ANIA_05174 ANIA_06360 ANIA_07428 ANIA_07602 ANIA_09467 ANIA_10171 ANIA_10213 ANIA_11004
0.0102319	24	45	1.79616	Ribonucleoprotein complex binding	http://amigo.geneontology.org/amigo/term/GO:0043021	ANIA_00068 ANIA_01711 ANIA_02271 ANIA_02775 ANIA_03055 ANIA_03096 ANIA_03156 ANIA_04015 ANIA_04043 ANIA_04163 ANIA_04530 ANIA_04742 ANIA_05719 ANIA_06330 ANIA_06627 ANIA_07714 ANIA_07721 ANIA_08173 ANIA_08824 ANIA_08883 ANIA_09437 ANIA_10170 ANIA_10315 ANIA_10734
0.0113457	210	593	1.19871	Catalytic complex	http://amigo.geneontology.org/amigo/term/GO:1902494	ANIA_00065 ANIA_00083 ANIA_00138 ANIA_00154 ANIA_00189 ANIA_00191 ANIA_00192 ANIA_00260 ANIA_00321 ANIA_00327 ANIA_00410 ANIA_00504 ANIA_00576 ANIA_00596 ANIA_00636 ANIA_00648 ANIA_00668 ANIA_00719 ANIA_00767 ANIA_00810 ANIA_00816 ANIA_00878 ANIA_00883 ANIA_00901 ANIA_00905 ANIA_00911 ANIA_01167 ANIA_01193 ANIA_01208 ANIA_01259 ANIA_01328 ANIA_01360 ANIA_01369 ANIA_01400 ANIA_01408 ANIA_01494 ANI…
0.0115256	87	224	1.33789	Negative regulation of macromolecule metabolic process	http://amigo.geneontology.org/amigo/term/GO:0010605	ANIA_00119 ANIA_00410 ANIA_00434 ANIA_00486 ANIA_00505 ANIA_00632 ANIA_00646 ANIA_00671 ANIA_00767 ANIA_01132 ANIA_01191 ANIA_01272 ANIA_01286 ANIA_01400 ANIA_01669 ANIA_01708 ANIA_01812 ANIA_01867 ANIA_01976 ANIA_02021 ANIA_02065 ANIA_02080 ANIA_02141 ANIA_02153 ANIA_02252 ANIA_02270 ANIA_02271 ANIA_02304 ANIA_02765 ANIA_02955 ANIA_03067 ANIA_03411 ANIA_03450 ANIA_03578 ANIA_03580 ANIA_03637 ANI…
0.0115974	15	25	2.10487	Retrograde transport, endosome to Golgi	http://amigo.geneontology.org/amigo/term/GO:0042147	ANIA_01038 ANIA_01272 ANIA_01283 ANIA_02736 ANIA_03015 ANIA_03594 ANIA_04014 ANIA_06289 ANIA_06598 ANIA_07602 ANIA_07993 ANIA_08868 ANIA_09356 ANIA_10594 ANIA_10918
0.0116206	21	40	1.86115	Cortical cytoskeleton	http://amigo.geneontology.org/amigo/term/GO:0030863	ANIA_00184 ANIA_00317 ANIA_00605 ANIA_00673 ANIA_01023 ANIA_01462 ANIA_02756 ANIA_03815 ANIA_04085 ANIA_04168 ANIA_04270 ANIA_04463 ANIA_05686 ANIA_05778 ANIA_06341 ANIA_07707 ANIA_08698 ANIA_08820 ANIA_09463 ANIA_10288 ANIA_10942
0.0120162	80	201	1.35389	Reproductive process	http://amigo.geneontology.org/amigo/term/GO:0022414	ANIA_00410 ANIA_00556 ANIA_00641 ANIA_00673 ANIA_00676 ANIA_00807 ANIA_01005 ANIA_01237 ANIA_01359 ANIA_01491 ANIA_01545 ANIA_01661 ANIA_01708 ANIA_01843 ANIA_01967 ANIA_02059 ANIA_02094 ANIA_02129 ANIA_02233 ANIA_02302 ANIA_02458 ANIA_02520 ANIA_03067 ANIA_03090 ANIA_03118 ANIA_03187 ANIA_03422 ANIA_03451 ANIA_03594 ANIA_03619 ANIA_03623 ANIA_03674 ANIA_03688 ANIA_03719 ANIA_03790 ANIA_03946 ANI…
0.012131	55	137	1.4471	Nuclease activity	http://amigo.geneontology.org/amigo/term/GO:0004518	ANIA_00076 ANIA_00119 ANIA_00189 ANIA_00258 ANIA_00437 ANIA_00556 ANIA_02065 ANIA_02139 ANIA_02252 ANIA_02271 ANIA_02457 ANIA_02637 ANIA_02661 ANIA_02764 ANIA_03067 ANIA_03118 ANIA_03186 ANIA_03619 ANIA_03629 ANIA_03652 ANIA_03657 ANIA_03812 ANIA_03947 ANIA_04331 ANIA_04425 ANIA_04530 ANIA_04789 ANIA_04958 ANIA_05013 ANIA_05114 ANIA_05188 ANIA_05408 ANIA_05680 ANIA_05898 ANIA_06088 ANIA_06514 ANI…
0.0121875	23	45	1.80138	Exonuclease activity	http://amigo.geneontology.org/amigo/term/GO:0004527	ANIA_00437 ANIA_00556 ANIA_02065 ANIA_02139 ANIA_02637 ANIA_02764 ANIA_03067 ANIA_03186 ANIA_03619 ANIA_03657 ANIA_04425 ANIA_04789 ANIA_05013 ANIA_05680 ANIA_05898 ANIA_07298 ANIA_07325 ANIA_07628 ANIA_08288 ANIA_10406 ANIA_10755 ANIA_10955 ANIA_11052
0.0122369	18	31	1.95549	Regulation of cellular localization	http://amigo.geneontology.org/amigo/term/GO:0060341	ANIA_00124 ANIA_00410 ANIA_00906 ANIA_01401 ANIA_01545 ANIA_03012 ANIA_04862 ANIA_04884 ANIA_05666 ANIA_06331 ANIA_06546 ANIA_07423 ANIA_07499 ANIA_08820 ANIA_08865 ANIA_10082 ANIA_10594 ANIA_10895
0.0122369	18	31	1.95549	DNA helicase activity	http://amigo.geneontology.org/amigo/term/GO:0003678	ANIA_00327 ANIA_00872 ANIA_02087 ANIA_02491 ANIA_03619 ANIA_03797 ANIA_03940 ANIA_04432 ANIA_04552 ANIA_05092 ANIA_05278 ANIA_05617 ANIA_05992 ANIA_07753 ANIA_09436 ANIA_10414 ANIA_10497 ANIA_10757
0.012969	214	610	1.19323	Oxoacid metabolic process	http://amigo.geneontology.org/amigo/term/GO:0043436	ANIA_00050 ANIA_00106 ANIA_00148 ANIA_00150 ANIA_00202 ANIA_00206 ANIA_00256 ANIA_00385 ANIA_00469 ANIA_00490 ANIA_00554 ANIA_00562 ANIA_00565 ANIA_00593 ANIA_00609 ANIA_00648 ANIA_00687 ANIA_00705 ANIA_00720 ANIA_00797 ANIA_00807 ANIA_00840 ANIA_00868 ANIA_00912 ANIA_00918 ANIA_01006 ANIA_01007 ANIA_01008 ANIA_01132 ANIA_01135 ANIA_01137 ANIA_01138 ANIA_01201 ANIA_01242 ANIA_01271 ANIA_01303 ANI…
0.0130435	48	111	1.48307	Negative regulation of gene expression	http://amigo.geneontology.org/amigo/term/GO:0010629	ANIA_00119 ANIA_00410 ANIA_00434 ANIA_00505 ANIA_00632 ANIA_00646 ANIA_00767 ANIA_01286 ANIA_02065 ANIA_02080 ANIA_02153 ANIA_02252 ANIA_02271 ANIA_03067 ANIA_03411 ANIA_03657 ANIA_03739 ANIA_03812 ANIA_04000 ANIA_04202 ANIA_04530 ANIA_04546 ANIA_04790 ANIA_04965 ANIA_05154 ANIA_05351 ANIA_05408 ANIA_05898 ANIA_06007 ANIA_06199 ANIA_06514 ANIA_06587 ANIA_06600 ANIA_06695 ANIA_07492 ANIA_07628 ANI…
0.0133448	210	598	1.19466	Carboxylic acid metabolic process	http://amigo.geneontology.org/amigo/term/GO:0019752	ANIA_00050 ANIA_00106 ANIA_00148 ANIA_00150 ANIA_00202 ANIA_00206 ANIA_00256 ANIA_00385 ANIA_00490 ANIA_00554 ANIA_00562 ANIA_00565 ANIA_00593 ANIA_00609 ANIA_00648 ANIA_00687 ANIA_00705 ANIA_00720 ANIA_00797 ANIA_00807 ANIA_00840 ANIA_00868 ANIA_00912 ANIA_00918 ANIA_01132 ANIA_01135 ANIA_01137 ANIA_01138 ANIA_01201 ANIA_01242 ANIA_01271 ANIA_01303 ANIA_01342 ANIA_01380 ANIA_01406 ANIA_01513 ANI…
0.0133448	38	84	1.56069	Actin filament-based process	http://amigo.geneontology.org/amigo/term/GO:0030029	ANIA_00184 ANIA_00306 ANIA_00410 ANIA_00504 ANIA_00594 ANIA_00605 ANIA_00673 ANIA_01023 ANIA_01171 ANIA_01306 ANIA_01462 ANIA_02126 ANIA_02484 ANIA_02756 ANIA_03171 ANIA_04168 ANIA_04270 ANIA_04278 ANIA_04385 ANIA_04919 ANIA_04998 ANIA_05529 ANIA_05686 ANIA_05778 ANIA_06304 ANIA_06341 ANIA_07707 ANIA_08065 ANIA_08496 ANIA_08698 ANIA_08836 ANIA_08862 ANIA_08877 ANIA_09463 ANIA_10288 ANIA_10397 ANI…
0.0133448	38	84	1.56069	Actin cytoskeleton organization	http://amigo.geneontology.org/amigo/term/GO:0030036	ANIA_00184 ANIA_00306 ANIA_00410 ANIA_00504 ANIA_00594 ANIA_00605 ANIA_00673 ANIA_01023 ANIA_01171 ANIA_01306 ANIA_01462 ANIA_02126 ANIA_02484 ANIA_02756 ANIA_03171 ANIA_04168 ANIA_04270 ANIA_04278 ANIA_04385 ANIA_04919 ANIA_04998 ANIA_05529 ANIA_05686 ANIA_05778 ANIA_06304 ANIA_06341 ANIA_07707 ANIA_08065 ANIA_08496 ANIA_08698 ANIA_08836 ANIA_08862 ANIA_08877 ANIA_09463 ANIA_10288 ANIA_10397 ANI…
0.0139222	92	235	1.31846	Protein catabolic process	http://amigo.geneontology.org/amigo/term/GO:0030163	ANIA_00084 ANIA_00349 ANIA_00551 ANIA_00596 ANIA_00810 ANIA_00883 ANIA_00905 ANIA_00911 ANIA_01167 ANIA_01293 ANIA_01573 ANIA_01658 ANIA_01742 ANIA_01757 ANIA_01909 ANIA_02066 ANIA_02085 ANIA_02237 ANIA_02240 ANIA_02302 ANIA_02304 ANIA_02413 ANIA_02497 ANIA_02761 ANIA_02961 ANIA_02972 ANIA_03054 ANIA_03450 ANIA_03453 ANIA_03493 ANIA_03711 ANIA_03716 ANIA_03733 ANIA_03756 ANIA_03764 ANIA_03932 ANI…
0.0139332	120	324	1.27087	Positive regulation of nucleobase-containing compound metabolic process	http://amigo.geneontology.org/amigo/term/GO:0045935	ANIA_00148 ANIA_00202 ANIA_00388 ANIA_00486 ANIA_00504 ANIA_00554 ANIA_00568 ANIA_00671 ANIA_00891 ANIA_01227 ANIA_01303 ANIA_01369 ANIA_01406 ANIA_01494 ANIA_01545 ANIA_01584 ANIA_01812 ANIA_02065 ANIA_02080 ANIA_02172 ANIA_02211 ANIA_02270 ANIA_02845 ANIA_03050 ANIA_03075 ANIA_03154 ANIA_03217 ANIA_03269 ANIA_03280 ANIA_03290 ANIA_03300 ANIA_03502 ANIA_03580 ANIA_03637 ANIA_03667 ANIA_03683 ANI…
0.0142269	33	71	1.61069	Carbon catabolite activation of transcription from RNA polymerase II promoter	http://amigo.geneontology.org/amigo/term/GO:0000436	ANIA_00388 ANIA_00568 ANIA_03217 ANIA_03269 ANIA_03280 ANIA_03300 ANIA_03502 ANIA_03683 ANIA_03684 ANIA_03986 ANIA_04001 ANIA_04750 ANIA_04785 ANIA_04821 ANIA_04837 ANIA_06832 ANIA_07189 ANIA_07971 ANIA_08164 ANIA_08355 ANIA_08506 ANIA_08732 ANIA_08885 ANIA_08978 ANIA_09292 ANIA_09458 ANIA_10423 ANIA_10504 ANIA_10550 ANIA_10638 ANIA_10976 ANIA_11093 ANIA_11098
0.0144835	26	53	1.71692	Actin filament organization	http://amigo.geneontology.org/amigo/term/GO:0007015	ANIA_00184 ANIA_00306 ANIA_00594 ANIA_00673 ANIA_01023 ANIA_01306 ANIA_01462 ANIA_02126 ANIA_02484 ANIA_02756 ANIA_03171 ANIA_04168 ANIA_04919 ANIA_05686 ANIA_05778 ANIA_06341 ANIA_07707 ANIA_08065 ANIA_08496 ANIA_08698 ANIA_08862 ANIA_08877 ANIA_09463 ANIA_10288 ANIA_10397 ANIA_10942
0.0145614	74	188	1.36184	Aromatic compound catabolic process	http://amigo.geneontology.org/amigo/term/GO:0019439	ANIA_00258 ANIA_00434 ANIA_00505 ANIA_00632 ANIA_00646 ANIA_00662 ANIA_00767 ANIA_00891 ANIA_01271 ANIA_01498 ANIA_01809 ANIA_01857 ANIA_01976 ANIA_02065 ANIA_02080 ANIA_02153 ANIA_02252 ANIA_02271 ANIA_02494 ANIA_02764 ANIA_02938 ANIA_03014 ANIA_03411 ANIA_03657 ANIA_03739 ANIA_03812 ANIA_03897 ANIA_04000 ANIA_04425 ANIA_04530 ANIA_04532 ANIA_04546 ANIA_04958 ANIA_04965 ANIA_05060 ANIA_05068 ANI…
0.0145784	13	20	2.18907	DNA-directed DNA polymerase activity	http://amigo.geneontology.org/amigo/term/GO:0003887	ANIA_00260 ANIA_02446 ANIA_03067 ANIA_03373 ANIA_03944 ANIA_04289 ANIA_04789 ANIA_05620 ANIA_07308 ANIA_07325 ANIA_07439 ANIA_10470 ANIA_10755
0.0150978	31	65	1.63128	GTPase regulator activity	http://amigo.geneontology.org/amigo/term/GO:0030695	ANIA_00084 ANIA_00108 ANIA_00163 ANIA_00167 ANIA_00261 ANIA_00449 ANIA_00978 ANIA_01344 ANIA_01629 ANIA_01661 ANIA_01931 ANIA_01980 ANIA_02080 ANIA_02081 ANIA_02130 ANIA_02222 ANIA_03159 ANIA_04274 ANIA_04369 ANIA_04537 ANIA_04862 ANIA_04890 ANIA_04998 ANIA_05592 ANIA_06033 ANIA_09413 ANIA_09463 ANIA_10459 ANIA_10754 ANIA_10882 ANIA_11010
0.0150978	31	65	1.63128	Nucleoside-triphosphatase regulator activity	http://amigo.geneontology.org/amigo/term/GO:0060589	ANIA_00084 ANIA_00108 ANIA_00163 ANIA_00167 ANIA_00261 ANIA_00449 ANIA_00978 ANIA_01344 ANIA_01629 ANIA_01661 ANIA_01931 ANIA_01980 ANIA_02080 ANIA_02081 ANIA_02130 ANIA_02222 ANIA_03159 ANIA_04274 ANIA_04369 ANIA_04537 ANIA_04862 ANIA_04890 ANIA_04998 ANIA_05592 ANIA_06033 ANIA_09413 ANIA_09463 ANIA_10459 ANIA_10754 ANIA_10882 ANIA_11010
0.0151301	7	8	2.94682	Chaperonin-containing T-complex	http://amigo.geneontology.org/amigo/term/GO:0005832	ANIA_00381 ANIA_01851 ANIA_01904 ANIA_02149 ANIA_03070 ANIA_03134 ANIA_05713
0.0151301	7	8	2.94682	Arp2/3 protein complex	http://amigo.geneontology.org/amigo/term/GO:0005885	ANIA_00306 ANIA_00673 ANIA_04919 ANIA_05778 ANIA_06341 ANIA_08065 ANIA_08698
0.0151301	7	8	2.94682	GTPase activator complex	http://amigo.geneontology.org/amigo/term/GO:1902773	ANIA_00978 ANIA_01272 ANIA_01283 ANIA_01344 ANIA_06289 ANIA_09413 ANIA_10459
0.0151301	7	8	2.94682	Negative regulation of catabolic process	http://amigo.geneontology.org/amigo/term/GO:0009895	ANIA_01867 ANIA_02304 ANIA_04000 ANIA_04546 ANIA_05982 ANIA_06695 ANIA_10138
0.0154841	52	121	1.44732	Transferase complex, transferring phosphorus-containing groups	http://amigo.geneontology.org/amigo/term/GO:0061695	ANIA_00083 ANIA_00138 ANIA_00192 ANIA_00260 ANIA_00321 ANIA_00576 ANIA_00816 ANIA_01369 ANIA_01494 ANIA_01668 ANIA_01669 ANIA_01867 ANIA_01965 ANIA_02049 ANIA_02172 ANIA_02211 ANIA_02446 ANIA_02769 ANIA_02902 ANIA_03033 ANIA_03067 ANIA_03166 ANIA_03169 ANIA_03753 ANIA_04182 ANIA_04283 ANIA_04709 ANIA_04789 ANIA_04790 ANIA_05708 ANIA_06252 ANIA_06360 ANIA_06558 ANIA_06687 ANIA_06711 ANIA_07015 ANI…
0.0155372	37	82	1.55761	Carbon catabolite regulation of transcription	http://amigo.geneontology.org/amigo/term/GO:0045990	ANIA_00388 ANIA_00554 ANIA_00568 ANIA_03217 ANIA_03269 ANIA_03280 ANIA_03300 ANIA_03502 ANIA_03683 ANIA_03684 ANIA_03986 ANIA_04001 ANIA_04166 ANIA_04750 ANIA_04785 ANIA_04821 ANIA_04837 ANIA_06293 ANIA_06832 ANIA_07189 ANIA_07468 ANIA_07971 ANIA_08164 ANIA_08355 ANIA_08506 ANIA_08732 ANIA_08885 ANIA_08978 ANIA_09292 ANIA_09458 ANIA_10423 ANIA_10504 ANIA_10550 ANIA_10638 ANIA_10976 ANIA_11093 ANI…
0.0157737	29	60	1.65536	GTPase activator activity	http://amigo.geneontology.org/amigo/term/GO:0005096	ANIA_00084 ANIA_00108 ANIA_00167 ANIA_00261 ANIA_00449 ANIA_00978 ANIA_01344 ANIA_01629 ANIA_01661 ANIA_01931 ANIA_01980 ANIA_02080 ANIA_02130 ANIA_02222 ANIA_03159 ANIA_04274 ANIA_04369 ANIA_04537 ANIA_04862 ANIA_04890 ANIA_04998 ANIA_05592 ANIA_06033 ANIA_09413 ANIA_09463 ANIA_10459 ANIA_10754 ANIA_10882 ANIA_11010
0.0162893	16	27	1.99573	Cell cycle G2/M phase transition	http://amigo.geneontology.org/amigo/term/GO:0044839	ANIA_00556 ANIA_01207 ANIA_01545 ANIA_02412 ANIA_02969 ANIA_03040 ANIA_03118 ANIA_03450 ANIA_04182 ANIA_04571 ANIA_05494 ANIA_05717 ANIA_06078 ANIA_06616 ANIA_08876 ANIA_10434
0.0162893	16	27	1.99573	Positive regulation of protein kinase activity	http://amigo.geneontology.org/amigo/term/GO:0045860	ANIA_01668 ANIA_01779 ANIA_02172 ANIA_02211 ANIA_03095 ANIA_03422 ANIA_04066 ANIA_04385 ANIA_04571 ANIA_05674 ANIA_05719 ANIA_06339 ANIA_06360 ANIA_08836 ANIA_09424 ANIA_11032
0.0162893	16	27	1.99573	G2/M transition of mitotic cell cycle	http://amigo.geneontology.org/amigo/term/GO:0000086	ANIA_00556 ANIA_01207 ANIA_01545 ANIA_02412 ANIA_02969 ANIA_03040 ANIA_03118 ANIA_03450 ANIA_04182 ANIA_04571 ANIA_05494 ANIA_05717 ANIA_06078 ANIA_06616 ANIA_08876 ANIA_10434
0.0162893	16	27	1.99573	Mediator complex	http://amigo.geneontology.org/amigo/term/GO:0016592	ANIA_00083 ANIA_00699 ANIA_01227 ANIA_02046 ANIA_02078 ANIA_02123 ANIA_02172 ANIA_02495 ANIA_04377 ANIA_05375 ANIA_06109 ANIA_06223 ANIA_07438 ANIA_09302 ANIA_10521 ANIA_10892
0.0169074	25	50	1.71826	Regulation of cytoskeleton organization	http://amigo.geneontology.org/amigo/term/GO:0051493	ANIA_00184 ANIA_00306 ANIA_00410 ANIA_00504 ANIA_00673 ANIA_01306 ANIA_01398 ANIA_02126 ANIA_02484 ANIA_02862 ANIA_03171 ANIA_04919 ANIA_04998 ANIA_05521 ANIA_05778 ANIA_06341 ANIA_08065 ANIA_08286 ANIA_08496 ANIA_08698 ANIA_08863 ANIA_09463 ANIA_10397 ANIA_10756 ANIA_10942
0.0170315	23	44	1.76044	Protein polyubiquitination	http://amigo.geneontology.org/amigo/term/GO:0000209	ANIA_00883 ANIA_00905 ANIA_00911 ANIA_01909 ANIA_02413 ANIA_02761 ANIA_02961 ANIA_03039 ANIA_03999 ANIA_04271 ANIA_04735 ANIA_05351 ANIA_05495 ANIA_05496 ANIA_05961 ANIA_06894 ANIA_07338 ANIA_07577 ANIA_08258 ANIA_09320 ANIA_10324 ANIA_10365 ANIA_10556
0.0170868	217	623	1.18446	Organic acid metabolic process	http://amigo.geneontology.org/amigo/term/GO:0006082	ANIA_00050 ANIA_00106 ANIA_00148 ANIA_00150 ANIA_00202 ANIA_00206 ANIA_00256 ANIA_00385 ANIA_00469 ANIA_00490 ANIA_00554 ANIA_00562 ANIA_00565 ANIA_00593 ANIA_00609 ANIA_00648 ANIA_00687 ANIA_00705 ANIA_00720 ANIA_00797 ANIA_00807 ANIA_00840 ANIA_00868 ANIA_00912 ANIA_00918 ANIA_01006 ANIA_01007 ANIA_01008 ANIA_01132 ANIA_01135 ANIA_01137 ANIA_01138 ANIA_01201 ANIA_01242 ANIA_01271 ANIA_01303 ANI…
0.0170868	113	307	1.27278	ATP-dependent activity	http://amigo.geneontology.org/amigo/term/GO:0140657	ANIA_00083 ANIA_00119 ANIA_00126 ANIA_00327 ANIA_00349 ANIA_00424 ANIA_00561 ANIA_00562 ANIA_00609 ANIA_00637 ANIA_00646 ANIA_00673 ANIA_00872 ANIA_00948 ANIA_01071 ANIA_01195 ANIA_01211 ANIA_01237 ANIA_01479 ANIA_01580 ANIA_01680 ANIA_01708 ANIA_02087 ANIA_02138 ANIA_02160 ANIA_02255 ANIA_02482 ANIA_02491 ANIA_02827 ANIA_02925 ANIA_02969 ANIA_02972 ANIA_03061 ANIA_03098 ANIA_03168 ANIA_03451 ANI…
0.0171308	76	190	1.34712	Modification-dependent protein catabolic process	http://amigo.geneontology.org/amigo/term/GO:0019941	ANIA_00084 ANIA_00551 ANIA_00596 ANIA_00810 ANIA_00883 ANIA_00905 ANIA_00911 ANIA_01167 ANIA_01293 ANIA_01658 ANIA_01757 ANIA_01909 ANIA_02066 ANIA_02085 ANIA_02240 ANIA_02302 ANIA_02304 ANIA_02413 ANIA_02761 ANIA_02961 ANIA_03450 ANIA_03453 ANIA_03493 ANIA_03711 ANIA_03716 ANIA_03733 ANIA_03756 ANIA_03932 ANIA_03939 ANIA_03999 ANIA_04037 ANIA_04236 ANIA_04441 ANIA_04449 ANIA_04457 ANIA_04492 ANI…
0.0173434	46	107	1.47542	Golgi vesicle transport	http://amigo.geneontology.org/amigo/term/GO:0048193	ANIA_00261 ANIA_00462 ANIA_00706 ANIA_01002 ANIA_01038 ANIA_01177 ANIA_01248 ANIA_01629 ANIA_01796 ANIA_01845 ANIA_01931 ANIA_02094 ANIA_03015 ANIA_03098 ANIA_03122 ANIA_03144 ANIA_03692 ANIA_03720 ANIA_03821 ANIA_04014 ANIA_04207 ANIA_04274 ANIA_04463 ANIA_04495 ANIA_04547 ANIA_04884 ANIA_04886 ANIA_05705 ANIA_05710 ANIA_06033 ANIA_06112 ANIA_06267 ANIA_06493 ANIA_06533 ANIA_07302 ANIA_07602 ANI…
0.0176284	8	10	2.69424	Mitotic DNA replication checkpoint signaling	http://amigo.geneontology.org/amigo/term/GO:0033314	ANIA_01207 ANIA_02969 ANIA_03040 ANIA_03450 ANIA_04571 ANIA_06616 ANIA_08876 ANIA_10434
0.0176284	8	10	2.69424	Arp2/3 complex-mediated actin nucleation	http://amigo.geneontology.org/amigo/term/GO:0034314	ANIA_00184 ANIA_00306 ANIA_00673 ANIA_04919 ANIA_05778 ANIA_06341 ANIA_08065 ANIA_08698
0.0176284	147	408	1.23151	Intracellular transport	http://amigo.geneontology.org/amigo/term/GO:0046907	ANIA_00068 ANIA_00084 ANIA_00095 ANIA_00124 ANIA_00165 ANIA_00244 ANIA_00255 ANIA_00261 ANIA_00317 ANIA_00434 ANIA_00576 ANIA_00706 ANIA_00906 ANIA_01023 ANIA_01038 ANIA_01056 ANIA_01177 ANIA_01182 ANIA_01190 ANIA_01223 ANIA_01238 ANIA_01272 ANIA_01283 ANIA_01293 ANIA_01326 ANIA_01401 ANIA_01462 ANIA_01629 ANIA_01638 ANIA_01711 ANIA_01796 ANIA_01845 ANIA_01907 ANIA_01931 ANIA_01953 ANIA_01980 ANI…
0.0176284	8	10	2.69424	Chromosome, telomeric repeat region	http://amigo.geneontology.org/amigo/term/GO:0140445	ANIA_00556 ANIA_01906 ANIA_02141 ANIA_03067 ANIA_04797 ANIA_06616 ANIA_07325 ANIA_07423
0.0176284	8	10	2.69424	Nuclear localization sequence binding	http://amigo.geneontology.org/amigo/term/GO:0008139	ANIA_00906 ANIA_02086 ANIA_02142 ANIA_02431 ANIA_05627 ANIA_05717 ANIA_06734 ANIA_07731
0.0179515	10	14	2.40557	Clathrin-coated vesicle	http://amigo.geneontology.org/amigo/term/GO:0030136	ANIA_02756 ANIA_03122 ANIA_03821 ANIA_04207 ANIA_04463 ANIA_05224 ANIA_07016 ANIA_07741 ANIA_08710 ANIA_08795
0.0179515	10	14	2.40557	Nuclear-transcribed mRNA catabolic process, nonsense-mediated decay	http://amigo.geneontology.org/amigo/term/GO:0000184	ANIA_00505 ANIA_00646 ANIA_02271 ANIA_03411 ANIA_06007 ANIA_06600 ANIA_06695 ANIA_07714 ANIA_10164 ANIA_11052
0.0179515	36	78	1.55437	Translation factor activity, RNA binding	http://amigo.geneontology.org/amigo/term/GO:0008135	ANIA_00138 ANIA_00167 ANIA_00872 ANIA_00978 ANIA_01080 ANIA_01344 ANIA_01494 ANIA_02063 ANIA_02080 ANIA_02769 ANIA_02775 ANIA_02907 ANIA_03055 ANIA_03156 ANIA_03411 ANIA_03462 ANIA_04015 ANIA_04038 ANIA_04218 ANIA_04259 ANIA_04470 ANIA_04742 ANIA_05745 ANIA_06330 ANIA_06700 ANIA_06864 ANIA_08066 ANIA_08824 ANIA_08853 ANIA_08883 ANIA_09304 ANIA_10139 ANIA_10459 ANIA_10501 ANIA_10535 ANIA_11128
0.0179515	10	14	2.40557	Clathrin binding	http://amigo.geneontology.org/amigo/term/GO:0030276	ANIA_02756 ANIA_03029 ANIA_03821 ANIA_04207 ANIA_04463 ANIA_05224 ANIA_05950 ANIA_07016 ANIA_07741 ANIA_08795
0.0179515	10	14	2.40557	Metalloaminopeptidase activity	http://amigo.geneontology.org/amigo/term/GO:0070006	ANIA_01638 ANIA_01780 ANIA_04282 ANIA_04404 ANIA_05810 ANIA_05812 ANIA_10351 ANIA_10540 ANIA_11005 ANIA_11070
0.0180852	9	12	2.52585	Double-strand break repair via break-induced replication	http://amigo.geneontology.org/amigo/term/GO:0000727	ANIA_00872 ANIA_02491 ANIA_03040 ANIA_03118 ANIA_03450 ANIA_03940 ANIA_05901 ANIA_05992 ANIA_10497
0.0180852	9	12	2.52585	Positive regulation of actin filament polymerization	http://amigo.geneontology.org/amigo/term/GO:0030838	ANIA_00184 ANIA_00306 ANIA_00673 ANIA_01306 ANIA_04919 ANIA_05778 ANIA_06341 ANIA_08065 ANIA_08698
0.0180852	9	12	2.52585	Actin nucleation	http://amigo.geneontology.org/amigo/term/GO:0045010	ANIA_00184 ANIA_00306 ANIA_00673 ANIA_01306 ANIA_04919 ANIA_05778 ANIA_06341 ANIA_08065 ANIA_08698
0.0180852	9	12	2.52585	DNA replication checkpoint signaling	http://amigo.geneontology.org/amigo/term/GO:0000076	ANIA_00410 ANIA_01207 ANIA_02969 ANIA_03040 ANIA_03450 ANIA_04571 ANIA_06616 ANIA_08876 ANIA_10434
0.0180852	9	12	2.52585	Positive regulation of sporulation resulting in formation of a cellular spore	http://amigo.geneontology.org/amigo/term/GO:0045881	ANIA_00807 ANIA_01545 ANIA_01661 ANIA_01967 ANIA_03719 ANIA_05028 ANIA_06505 ANIA_06578 ANIA_09121
0.0180852	9	13	2.52585	Threonine metabolic process	http://amigo.geneontology.org/amigo/term/GO:0006566	ANIA_00554 ANIA_01908 ANIA_02882 ANIA_03031 ANIA_04793 ANIA_05426 ANIA_07564 ANIA_08978 ANIA_08979
0.0185671	117	318	1.26292	Positive regulation of RNA metabolic process	http://amigo.geneontology.org/amigo/term/GO:0051254	ANIA_00148 ANIA_00202 ANIA_00388 ANIA_00486 ANIA_00554 ANIA_00568 ANIA_00671 ANIA_00891 ANIA_01227 ANIA_01303 ANIA_01369 ANIA_01406 ANIA_01494 ANIA_01545 ANIA_01584 ANIA_01812 ANIA_02065 ANIA_02080 ANIA_02172 ANIA_02211 ANIA_02270 ANIA_02845 ANIA_03050 ANIA_03075 ANIA_03154 ANIA_03217 ANIA_03269 ANIA_03280 ANIA_03290 ANIA_03300 ANIA_03502 ANIA_03580 ANIA_03637 ANIA_03667 ANIA_03683 ANIA_03684 ANI…
0.019381	24	48	1.71973	Positive regulation of cellular catabolic process	http://amigo.geneontology.org/amigo/term/GO:0031331	ANIA_00439 ANIA_01545 ANIA_01867 ANIA_02065 ANIA_02080 ANIA_04000 ANIA_04965 ANIA_05808 ANIA_05898 ANIA_05961 ANIA_06199 ANIA_06587 ANIA_06890 ANIA_07492 ANIA_07628 ANIA_07746 ANIA_09090 ANIA_09320 ANIA_09467 ANIA_10119 ANIA_10121 ANIA_10362 ANIA_10406 ANIA_10956
0.019381	24	48	1.71973	Positive regulation of hydrolase activity	http://amigo.geneontology.org/amigo/term/GO:0051345	ANIA_00084 ANIA_00108 ANIA_00261 ANIA_01167 ANIA_01629 ANIA_01661 ANIA_01931 ANIA_01980 ANIA_02222 ANIA_04000 ANIA_04274 ANIA_04449 ANIA_04457 ANIA_04537 ANIA_04862 ANIA_04890 ANIA_04998 ANIA_06033 ANIA_07015 ANIA_09413 ANIA_09463 ANIA_10754 ANIA_10882 ANIA_11010
0.0198218	78	198	1.33344	Modification-dependent macromolecule catabolic process	http://amigo.geneontology.org/amigo/term/GO:0043632	ANIA_00084 ANIA_00551 ANIA_00596 ANIA_00810 ANIA_00883 ANIA_00905 ANIA_00911 ANIA_01167 ANIA_01293 ANIA_01658 ANIA_01757 ANIA_01909 ANIA_02066 ANIA_02085 ANIA_02240 ANIA_02302 ANIA_02304 ANIA_02413 ANIA_02761 ANIA_02961 ANIA_03450 ANIA_03453 ANIA_03493 ANIA_03657 ANIA_03711 ANIA_03716 ANIA_03733 ANIA_03756 ANIA_03932 ANIA_03939 ANIA_03999 ANIA_04037 ANIA_04236 ANIA_04441 ANIA_04449 ANIA_04457 ANI…
0.0204186	377	1139	1.12859	Cellular component organization	http://amigo.geneontology.org/amigo/term/GO:0016043	ANIA_00038 ANIA_00083 ANIA_00084 ANIA_00106 ANIA_00108 ANIA_00127 ANIA_00143 ANIA_00184 ANIA_00244 ANIA_00261 ANIA_00306 ANIA_00327 ANIA_00405 ANIA_00410 ANIA_00414 ANIA_00421 ANIA_00424 ANIA_00434 ANIA_00437 ANIA_00439 ANIA_00504 ANIA_00556 ANIA_00558 ANIA_00594 ANIA_00605 ANIA_00632 ANIA_00667 ANIA_00673 ANIA_00676 ANIA_00706 ANIA_00719 ANIA_00763 ANIA_00848 ANIA_00864 ANIA_00872 ANIA_00905 ANI…
0.0208893	35	78	1.55096	Carbon catabolite regulation of transcription from RNA polymerase II promoter	http://amigo.geneontology.org/amigo/term/GO:0000429	ANIA_00388 ANIA_00568 ANIA_03217 ANIA_03269 ANIA_03280 ANIA_03300 ANIA_03502 ANIA_03683 ANIA_03684 ANIA_03986 ANIA_04001 ANIA_04750 ANIA_04785 ANIA_04821 ANIA_04837 ANIA_06293 ANIA_06832 ANIA_07189 ANIA_07468 ANIA_07971 ANIA_08164 ANIA_08355 ANIA_08506 ANIA_08732 ANIA_08885 ANIA_08978 ANIA_09292 ANIA_09458 ANIA_10423 ANIA_10504 ANIA_10550 ANIA_10638 ANIA_10976 ANIA_11093 ANIA_11098
0.020959	51	122	1.43131	Cytoskeletal protein binding	http://amigo.geneontology.org/amigo/term/GO:0008092	ANIA_00108 ANIA_00184 ANIA_00306 ANIA_00317 ANIA_00641 ANIA_00673 ANIA_01005 ANIA_01023 ANIA_01056 ANIA_01130 ANIA_01306 ANIA_01398 ANIA_01462 ANIA_02126 ANIA_02484 ANIA_02756 ANIA_02862 ANIA_03710 ANIA_03970 ANIA_04168 ANIA_04270 ANIA_04602 ANIA_04867 ANIA_04890 ANIA_04919 ANIA_04961 ANIA_05116 ANIA_05343 ANIA_05521 ANIA_05531 ANIA_05686 ANIA_05778 ANIA_05873 ANIA_06341 ANIA_06863 ANIA_06875 ANI…
0.0225857	25	50	1.6839	Spindle pole body	http://amigo.geneontology.org/amigo/term/GO:0005816	ANIA_00410 ANIA_00676 ANIA_01005 ANIA_01191 ANIA_01398 ANIA_01401 ANIA_02773 ANIA_03710 ANIA_04085 ANIA_04182 ANIA_04867 ANIA_05181 ANIA_05521 ANIA_05666 ANIA_05873 ANIA_06224 ANIA_06288 ANIA_06616 ANIA_06974 ANIA_07206 ANIA_08286 ANIA_08751 ANIA_09413 ANIA_09467 ANIA_11166
0.0225857	36	79	1.53469	Translation regulator activity, nucleic acid binding	http://amigo.geneontology.org/amigo/term/GO:0090079	ANIA_00138 ANIA_00167 ANIA_00872 ANIA_00978 ANIA_01080 ANIA_01344 ANIA_01494 ANIA_02063 ANIA_02080 ANIA_02769 ANIA_02775 ANIA_02907 ANIA_03055 ANIA_03156 ANIA_03411 ANIA_03462 ANIA_04015 ANIA_04038 ANIA_04218 ANIA_04259 ANIA_04470 ANIA_04742 ANIA_05745 ANIA_06330 ANIA_06700 ANIA_06864 ANIA_08066 ANIA_08824 ANIA_08853 ANIA_08883 ANIA_09304 ANIA_10139 ANIA_10459 ANIA_10501 ANIA_10535 ANIA_11128
0.0233073	121	330	1.25001	Cellular macromolecule localization	http://amigo.geneontology.org/amigo/term/GO:0070727	ANIA_00068 ANIA_00084 ANIA_00127 ANIA_00165 ANIA_00244 ANIA_00261 ANIA_00410 ANIA_00434 ANIA_00462 ANIA_00576 ANIA_00632 ANIA_00706 ANIA_00906 ANIA_00960 ANIA_01177 ANIA_01190 ANIA_01223 ANIA_01272 ANIA_01283 ANIA_01293 ANIA_01394 ANIA_01401 ANIA_01545 ANIA_01638 ANIA_01907 ANIA_01980 ANIA_02066 ANIA_02086 ANIA_02093 ANIA_02142 ANIA_02164 ANIA_02418 ANIA_02431 ANIA_02484 ANIA_02496 ANIA_02756 ANI…
0.0252653	16	28	1.92446	Cellular metabolic compound salvage	http://amigo.geneontology.org/amigo/term/GO:0043094	ANIA_00270 ANIA_00662 ANIA_02494 ANIA_03222 ANIA_03593 ANIA_04382 ANIA_05492 ANIA_05655 ANIA_06078 ANIA_06490 ANIA_07108 ANIA_07502 ANIA_08869 ANIA_08872 ANIA_09083 ANIA_10230
0.0252653	16	29	1.92446	Actin filament binding	http://amigo.geneontology.org/amigo/term/GO:0051015	ANIA_00306 ANIA_00673 ANIA_01306 ANIA_02756 ANIA_04168 ANIA_04919 ANIA_05686 ANIA_05778 ANIA_06341 ANIA_07707 ANIA_08065 ANIA_08496 ANIA_08862 ANIA_09463 ANIA_10288 ANIA_10942
0.025578	57	138	1.39105	Proteasomal protein catabolic process	http://amigo.geneontology.org/amigo/term/GO:0010498	ANIA_00551 ANIA_00596 ANIA_00810 ANIA_00905 ANIA_00911 ANIA_01757 ANIA_01909 ANIA_02085 ANIA_02240 ANIA_02302 ANIA_02304 ANIA_02413 ANIA_02961 ANIA_03450 ANIA_03493 ANIA_03733 ANIA_03756 ANIA_03932 ANIA_03999 ANIA_04037 ANIA_04236 ANIA_04441 ANIA_04449 ANIA_04457 ANIA_04492 ANIA_04535 ANIA_04735 ANIA_04761 ANIA_04775 ANIA_04800 ANIA_04869 ANIA_05105 ANIA_05121 ANIA_05351 ANIA_05495 ANIA_05793 ANI…
0.025686	65	164	1.35967	Methylation	http://amigo.geneontology.org/amigo/term/GO:0032259	ANIA_00065 ANIA_00128 ANIA_00130 ANIA_00134 ANIA_00685 ANIA_00690 ANIA_00720 ANIA_00807 ANIA_01191 ANIA_01614 ANIA_01751 ANIA_01901 ANIA_01905 ANIA_02165 ANIA_02190 ANIA_02405 ANIA_02759 ANIA_03038 ANIA_03096 ANIA_03236 ANIA_03378 ANIA_03580 ANIA_03600 ANIA_04543 ANIA_04625 ANIA_04764 ANIA_04774 ANIA_05119 ANIA_05415 ANIA_05688 ANIA_05789 ANIA_05795 ANIA_06072 ANIA_06094 ANIA_06162 ANIA_06349 ANI…
0.025686	5	5	3.3678	Inosine metabolic process	http://amigo.geneontology.org/amigo/term/GO:0046102	ANIA_00662 ANIA_02494 ANIA_03222 ANIA_05492 ANIA_06490
0.025686	5	5	3.3678	TRNA 5 -end processing	http://amigo.geneontology.org/amigo/term/GO:0099116	ANIA_00189 ANIA_00804 ANIA_03652 ANIA_06088 ANIA_10784
0.025686	5	5	3.3678	Eukaryotic translation initiation factor 2B complex	http://amigo.geneontology.org/amigo/term/GO:0005851	ANIA_00167 ANIA_00978 ANIA_01344 ANIA_03156 ANIA_10459
0.025686	5	5	3.3678	Ctf18 RFC-like complex	http://amigo.geneontology.org/amigo/term/GO:0031390	ANIA_02160 ANIA_06300 ANIA_06517 ANIA_08064 ANIA_10253
0.0268381	29	61	1.60108	Cell division site	http://amigo.geneontology.org/amigo/term/GO:0032153	ANIA_00410 ANIA_00676 ANIA_01005 ANIA_01171 ANIA_01205 ANIA_01394 ANIA_02756 ANIA_03815 ANIA_04085 ANIA_04166 ANIA_04867 ANIA_05529 ANIA_05592 ANIA_05666 ANIA_05686 ANIA_05873 ANIA_06288 ANIA_06341 ANIA_07707 ANIA_08182 ANIA_08270 ANIA_08288 ANIA_08820 ANIA_08863 ANIA_08874 ANIA_09463 ANIA_10061 ANIA_10595 ANIA_10942
0.0279601	61	158	1.36957	Nucleic acid phosphodiester bond hydrolysis	http://amigo.geneontology.org/amigo/term/GO:0090305	ANIA_00076 ANIA_00119 ANIA_00161 ANIA_00189 ANIA_00258 ANIA_00421 ANIA_00437 ANIA_00556 ANIA_02065 ANIA_02139 ANIA_02252 ANIA_02457 ANIA_02637 ANIA_02661 ANIA_02759 ANIA_02764 ANIA_03067 ANIA_03118 ANIA_03172 ANIA_03186 ANIA_03619 ANIA_03652 ANIA_03657 ANIA_03812 ANIA_03947 ANIA_04331 ANIA_04425 ANIA_04530 ANIA_04599 ANIA_04789 ANIA_04958 ANIA_05013 ANIA_05114 ANIA_05154 ANIA_05188 ANIA_05408 ANI…
0.0279845	12	20	2.12703	DNA strand elongation	http://amigo.geneontology.org/amigo/term/GO:0022616	ANIA_02491 ANIA_02969 ANIA_03067 ANIA_03129 ANIA_05992 ANIA_06069 ANIA_06517 ANIA_07308 ANIA_07325 ANIA_10470 ANIA_10497 ANIA_10755
0.0279845	12	20	2.12703	DNA strand elongation involved in DNA replication	http://amigo.geneontology.org/amigo/term/GO:0006271	ANIA_02491 ANIA_02969 ANIA_03067 ANIA_03129 ANIA_05992 ANIA_06069 ANIA_06517 ANIA_07308 ANIA_07325 ANIA_10470 ANIA_10497 ANIA_10755
0.0279845	12	20	2.12703	Kinesin complex	http://amigo.geneontology.org/amigo/term/GO:0005871	ANIA_01071 ANIA_01580 ANIA_03547 ANIA_03970 ANIA_05343 ANIA_06863 ANIA_06875 ANIA_08286 ANIA_08322 ANIA_08457 ANIA_09426 ANIA_10448
0.0285282	55	133	1.3927	Proteasome-mediated ubiquitin-dependent protein catabolic process	http://amigo.geneontology.org/amigo/term/GO:0043161	ANIA_00551 ANIA_00596 ANIA_00810 ANIA_00905 ANIA_00911 ANIA_01757 ANIA_01909 ANIA_02085 ANIA_02240 ANIA_02302 ANIA_02304 ANIA_02413 ANIA_02961 ANIA_03450 ANIA_03493 ANIA_03733 ANIA_03756 ANIA_03932 ANIA_03999 ANIA_04037 ANIA_04236 ANIA_04441 ANIA_04449 ANIA_04457 ANIA_04492 ANIA_04535 ANIA_04735 ANIA_04775 ANIA_04800 ANIA_04869 ANIA_05121 ANIA_05351 ANIA_05495 ANIA_05793 ANIA_05845 ANIA_05872 ANI…
0.0286433	27	56	1.62376	Microtubule organizing center	http://amigo.geneontology.org/amigo/term/GO:0005815	ANIA_00410 ANIA_00676 ANIA_01005 ANIA_01191 ANIA_01398 ANIA_01401 ANIA_02773 ANIA_02862 ANIA_03710 ANIA_04085 ANIA_04182 ANIA_04867 ANIA_05181 ANIA_05521 ANIA_05666 ANIA_05873 ANIA_06224 ANIA_06288 ANIA_06616 ANIA_06974 ANIA_07206 ANIA_08286 ANIA_08751 ANIA_09413 ANIA_09467 ANIA_10137 ANIA_11166
0.0289011	118	322	1.24577	Cellular protein localization	http://amigo.geneontology.org/amigo/term/GO:0034613	ANIA_00068 ANIA_00084 ANIA_00127 ANIA_00165 ANIA_00244 ANIA_00261 ANIA_00410 ANIA_00462 ANIA_00576 ANIA_00706 ANIA_00906 ANIA_00960 ANIA_01177 ANIA_01190 ANIA_01223 ANIA_01272 ANIA_01283 ANIA_01293 ANIA_01394 ANIA_01401 ANIA_01545 ANIA_01638 ANIA_01907 ANIA_01980 ANIA_02066 ANIA_02086 ANIA_02093 ANIA_02142 ANIA_02164 ANIA_02418 ANIA_02431 ANIA_02484 ANIA_02496 ANIA_02756 ANIA_02862 ANIA_02925 ANI…
0.0293498	15	26	1.94296	Regulation of protein localization	http://amigo.geneontology.org/amigo/term/GO:0032880	ANIA_00410 ANIA_01401 ANIA_01545 ANIA_01867 ANIA_03012 ANIA_03100 ANIA_04862 ANIA_04890 ANIA_06546 ANIA_07423 ANIA_07499 ANIA_08865 ANIA_10082 ANIA_10594 ANIA_10895
0.030324	51	124	1.40785	Meiotic cell cycle	http://amigo.geneontology.org/amigo/term/GO:0051321	ANIA_00410 ANIA_00556 ANIA_00673 ANIA_00676 ANIA_00807 ANIA_01005 ANIA_01237 ANIA_01359 ANIA_01545 ANIA_01661 ANIA_01708 ANIA_01843 ANIA_01967 ANIA_02059 ANIA_02302 ANIA_02458 ANIA_03067 ANIA_03090 ANIA_03118 ANIA_03187 ANIA_03451 ANIA_03594 ANIA_03619 ANIA_03674 ANIA_03719 ANIA_03946 ANIA_04182 ANIA_04331 ANIA_04752 ANIA_04867 ANIA_05028 ANIA_05406 ANIA_05494 ANIA_05873 ANIA_06505 ANIA_06578 ANI…
0.0303888	25	52	1.65088	Lipoprotein metabolic process	http://amigo.geneontology.org/amigo/term/GO:0042157	ANIA_00127 ANIA_00636 ANIA_01775 ANIA_01796 ANIA_01907 ANIA_02096 ANIA_02240 ANIA_02303 ANIA_02497 ANIA_03588 ANIA_03826 ANIA_03839 ANIA_04235 ANIA_04495 ANIA_05011 ANIA_05174 ANIA_06496 ANIA_06589 ANIA_07049 ANIA_07428 ANIA_08822 ANIA_10268 ANIA_10439 ANIA_10611 ANIA_10639
0.0317007	11	17	2.17916	Regulation of dephosphorylation	http://amigo.geneontology.org/amigo/term/GO:0035303	ANIA_00120 ANIA_00410 ANIA_01400 ANIA_01545 ANIA_01669 ANIA_03625 ANIA_03905 ANIA_04085 ANIA_05708 ANIA_05814 ANIA_09467
0.0317007	11	17	2.17916	Cytoplasmic stress granule	http://amigo.geneontology.org/amigo/term/GO:0010494	ANIA_01325 ANIA_02482 ANIA_03411 ANIA_04000 ANIA_05529 ANIA_06711 ANIA_07480 ANIA_08853 ANIA_10164 ANIA_10417 ANIA_11052
0.0317798	23	46	1.6839	Regulation of reproductive process	http://amigo.geneontology.org/amigo/term/GO:2000241	ANIA_00641 ANIA_00807 ANIA_01359 ANIA_01545 ANIA_01661 ANIA_01967 ANIA_02059 ANIA_02094 ANIA_02520 ANIA_03090 ANIA_03619 ANIA_03688 ANIA_03719 ANIA_04163 ANIA_04182 ANIA_05028 ANIA_05494 ANIA_05836 ANIA_06505 ANIA_06578 ANIA_06749 ANIA_07743 ANIA_09121
0.0317798	23	46	1.6839	Condensed chromosome, centromeric region	http://amigo.geneontology.org/amigo/term/GO:0000779	ANIA_00143 ANIA_00166 ANIA_00960 ANIA_01056 ANIA_01398 ANIA_01401 ANIA_01432 ANIA_01977 ANIA_02439 ANIA_02886 ANIA_03187 ANIA_03451 ANIA_03710 ANIA_04804 ANIA_04961 ANIA_05521 ANIA_06224 ANIA_06600 ANIA_07048 ANIA_08263 ANIA_08719 ANIA_09435 ANIA_09467
0.0319005	17	31	1.84686	P-body	http://amigo.geneontology.org/amigo/term/GO:0000932	ANIA_01055 ANIA_02065 ANIA_04965 ANIA_04967 ANIA_05154 ANIA_05898 ANIA_06199 ANIA_07480 ANIA_07492 ANIA_07628 ANIA_07746 ANIA_10119 ANIA_10121 ANIA_10362 ANIA_10417 ANIA_10963 ANIA_11052
0.0326467	19	36	1.77745	Negative regulation of organelle organization	http://amigo.geneontology.org/amigo/term/GO:0010639	ANIA_00184 ANIA_00410 ANIA_00504 ANIA_01306 ANIA_01545 ANIA_02126 ANIA_02302 ANIA_02439 ANIA_02484 ANIA_02491 ANIA_03946 ANIA_04085 ANIA_05494 ANIA_06341 ANIA_07423 ANIA_08496 ANIA_09435 ANIA_10397 ANIA_10942
0.0326467	21	41	1.72497	Regulation of chromosome organization	http://amigo.geneontology.org/amigo/term/GO:0033044	ANIA_00410 ANIA_00504 ANIA_00905 ANIA_01191 ANIA_01545 ANIA_02141 ANIA_02302 ANIA_02439 ANIA_02491 ANIA_03067 ANIA_03946 ANIA_04085 ANIA_04399 ANIA_04735 ANIA_05102 ANIA_05495 ANIA_07423 ANIA_07499 ANIA_08013 ANIA_09435 ANIA_10956
0.0326467	19	37	1.77745	Regulation of mRNA stability	http://amigo.geneontology.org/amigo/term/GO:0043488	ANIA_02065 ANIA_02080 ANIA_03739 ANIA_04000 ANIA_04546 ANIA_04965 ANIA_05898 ANIA_06199 ANIA_06587 ANIA_06695 ANIA_07492 ANIA_07628 ANIA_07746 ANIA_09090 ANIA_10119 ANIA_10121 ANIA_10164 ANIA_10362 ANIA_10406
0.0326467	19	37	1.77745	Positive regulation of GTPase activity	http://amigo.geneontology.org/amigo/term/GO:0043547	ANIA_00084 ANIA_00108 ANIA_00261 ANIA_01629 ANIA_01661 ANIA_01931 ANIA_01980 ANIA_02222 ANIA_04274 ANIA_04537 ANIA_04862 ANIA_04890 ANIA_04998 ANIA_06033 ANIA_09413 ANIA_09463 ANIA_10754 ANIA_10882 ANIA_11010
0.0326467	19	37	1.77745	Regulation of mRNA catabolic process	http://amigo.geneontology.org/amigo/term/GO:0061013	ANIA_02065 ANIA_02080 ANIA_03739 ANIA_04000 ANIA_04546 ANIA_04965 ANIA_05898 ANIA_06199 ANIA_06587 ANIA_06695 ANIA_07492 ANIA_07628 ANIA_07746 ANIA_09090 ANIA_10119 ANIA_10121 ANIA_10164 ANIA_10362 ANIA_10406
0.033637	147	413	1.21043	Amide biosynthetic process	http://amigo.geneontology.org/amigo/term/GO:0043604	ANIA_00106 ANIA_00167 ANIA_00256 ANIA_00278 ANIA_00505 ANIA_00554 ANIA_00565 ANIA_00641 ANIA_00705 ANIA_00720 ANIA_00872 ANIA_00907 ANIA_00918 ANIA_00978 ANIA_01080 ANIA_01122 ANIA_01166 ANIA_01201 ANIA_01228 ANIA_01344 ANIA_01380 ANIA_01494 ANIA_01665 ANIA_01751 ANIA_01913 ANIA_02063 ANIA_02065 ANIA_02080 ANIA_02150 ANIA_02237 ANIA_02244 ANIA_02246 ANIA_02301 ANIA_02333 ANIA_02435 ANIA_02464 ANI…
0.0336457	26	54	1.62153	RNA export from nucleus	http://amigo.geneontology.org/amigo/term/GO:0006405	ANIA_00084 ANIA_00434 ANIA_01190 ANIA_01326 ANIA_01401 ANIA_02086 ANIA_02271 ANIA_03012 ANIA_03172 ANIA_03651 ANIA_03657 ANIA_03739 ANIA_04293 ANIA_05627 ANIA_05717 ANIA_06143 ANIA_06175 ANIA_06331 ANIA_06738 ANIA_06980 ANIA_07013 ANIA_07714 ANIA_07726 ANIA_08787 ANIA_10112 ANIA_10362
0.0337268	146	410	1.21108	Protein localization	http://amigo.geneontology.org/amigo/term/GO:0008104	ANIA_00068 ANIA_00084 ANIA_00127 ANIA_00165 ANIA_00244 ANIA_00255 ANIA_00261 ANIA_00410 ANIA_00462 ANIA_00576 ANIA_00706 ANIA_00725 ANIA_00906 ANIA_00960 ANIA_01002 ANIA_01177 ANIA_01190 ANIA_01223 ANIA_01272 ANIA_01283 ANIA_01293 ANIA_01297 ANIA_01394 ANIA_01401 ANIA_01545 ANIA_01638 ANIA_01711 ANIA_01867 ANIA_01907 ANIA_01980 ANIA_02066 ANIA_02086 ANIA_02093 ANIA_02094 ANIA_02142 ANIA_02164 ANI…
0.0338425	14	24	1.96455	Regulation of sporulation resulting in formation of a cellular spore	http://amigo.geneontology.org/amigo/term/GO:0042173	ANIA_00641 ANIA_00807 ANIA_01359 ANIA_01545 ANIA_01661 ANIA_01967 ANIA_02059 ANIA_03090 ANIA_03719 ANIA_05028 ANIA_06505 ANIA_06578 ANIA_06749 ANIA_09121
0.0338425	14	25	1.96455	Microtubule motor activity	http://amigo.geneontology.org/amigo/term/GO:0003777	ANIA_01071 ANIA_01580 ANIA_03547 ANIA_03970 ANIA_04664 ANIA_05343 ANIA_06863 ANIA_06875 ANIA_08286 ANIA_08322 ANIA_08457 ANIA_08862 ANIA_09426 ANIA_10448
0.0338425	14	25	1.96455	3 -5 exonuclease activity	http://amigo.geneontology.org/amigo/term/GO:0008408	ANIA_00556 ANIA_02065 ANIA_03067 ANIA_03619 ANIA_03657 ANIA_04425 ANIA_04789 ANIA_05680 ANIA_05898 ANIA_07298 ANIA_07325 ANIA_07628 ANIA_10755 ANIA_10955
0.0348121	10	15	2.2452	Golgi to plasma membrane transport	http://amigo.geneontology.org/amigo/term/GO:0006893	ANIA_00462 ANIA_01002 ANIA_03098 ANIA_03122 ANIA_05705 ANIA_06493 ANIA_08710 ANIA_08879 ANIA_10061 ANIA_11007
0.0351301	45	108	1.42972	Meiotic cell cycle process	http://amigo.geneontology.org/amigo/term/GO:1903046	ANIA_00410 ANIA_00556 ANIA_00673 ANIA_00676 ANIA_00807 ANIA_01237 ANIA_01359 ANIA_01545 ANIA_01661 ANIA_01708 ANIA_01843 ANIA_01967 ANIA_02059 ANIA_02302 ANIA_02458 ANIA_03067 ANIA_03090 ANIA_03118 ANIA_03187 ANIA_03451 ANIA_03594 ANIA_03619 ANIA_03719 ANIA_03946 ANIA_04331 ANIA_04752 ANIA_05028 ANIA_05406 ANIA_05494 ANIA_06505 ANIA_06578 ANIA_06616 ANIA_06636 ANIA_06728 ANIA_06749 ANIA_06878 ANI…
0.0353974	113	311	1.24366	Positive regulation of macromolecule biosynthetic process	http://amigo.geneontology.org/amigo/term/GO:0010557	ANIA_00148 ANIA_00202 ANIA_00388 ANIA_00486 ANIA_00505 ANIA_00554 ANIA_00568 ANIA_00671 ANIA_00891 ANIA_01227 ANIA_01303 ANIA_01369 ANIA_01406 ANIA_01494 ANIA_01545 ANIA_01584 ANIA_01779 ANIA_01812 ANIA_02172 ANIA_02211 ANIA_02270 ANIA_02845 ANIA_03050 ANIA_03075 ANIA_03154 ANIA_03217 ANIA_03269 ANIA_03280 ANIA_03290 ANIA_03300 ANIA_03502 ANIA_03580 ANIA_03637 ANIA_03667 ANIA_03683 ANIA_03684 ANI…
0.0353974	51	124	1.3964	Protein modification by small protein conjugation	http://amigo.geneontology.org/amigo/term/GO:0032446	ANIA_00596 ANIA_00810 ANIA_00883 ANIA_00905 ANIA_00911 ANIA_01191 ANIA_01658 ANIA_01746 ANIA_01909 ANIA_02129 ANIA_02214 ANIA_02298 ANIA_02302 ANIA_02327 ANIA_02413 ANIA_02416 ANIA_02441 ANIA_02450 ANIA_02458 ANIA_02490 ANIA_02761 ANIA_02961 ANIA_03039 ANIA_03447 ANIA_03939 ANIA_03999 ANIA_04271 ANIA_04399 ANIA_04735 ANIA_05351 ANIA_05495 ANIA_05496 ANIA_05961 ANIA_06049 ANIA_06052 ANIA_06646 ANI…
0.0353974	24	50	1.64953	Positive regulation of catabolic process	http://amigo.geneontology.org/amigo/term/GO:0009896	ANIA_00439 ANIA_01545 ANIA_01867 ANIA_02065 ANIA_02080 ANIA_04000 ANIA_04965 ANIA_05808 ANIA_05898 ANIA_05961 ANIA_06199 ANIA_06587 ANIA_06890 ANIA_07492 ANIA_07628 ANIA_07746 ANIA_09090 ANIA_09320 ANIA_09467 ANIA_10119 ANIA_10121 ANIA_10362 ANIA_10406 ANIA_10956
0.0354395	111	301	1.24608	Signaling	http://amigo.geneontology.org/amigo/term/GO:0023052	ANIA_00038 ANIA_00106 ANIA_00120 ANIA_00163 ANIA_00410 ANIA_00439 ANIA_00449 ANIA_00504 ANIA_00556 ANIA_00575 ANIA_00676 ANIA_00822 ANIA_00847 ANIA_00953 ANIA_01025 ANIA_01171 ANIA_01207 ANIA_01545 ANIA_01661 ANIA_01800 ANIA_01867 ANIA_02130 ANIA_02222 ANIA_02246 ANIA_02363 ANIA_02412 ANIA_02439 ANIA_02520 ANIA_02554 ANIA_02947 ANIA_02969 ANIA_03040 ANIA_03065 ANIA_03090 ANIA_03095 ANIA_03118 ANI…
0.0354395	111	301	1.24608	Signal transduction	http://amigo.geneontology.org/amigo/term/GO:0007165	ANIA_00038 ANIA_00106 ANIA_00120 ANIA_00163 ANIA_00410 ANIA_00439 ANIA_00449 ANIA_00504 ANIA_00556 ANIA_00575 ANIA_00676 ANIA_00822 ANIA_00847 ANIA_00953 ANIA_01025 ANIA_01171 ANIA_01207 ANIA_01545 ANIA_01661 ANIA_01800 ANIA_01867 ANIA_02130 ANIA_02222 ANIA_02246 ANIA_02363 ANIA_02412 ANIA_02439 ANIA_02520 ANIA_02554 ANIA_02947 ANIA_02969 ANIA_03040 ANIA_03065 ANIA_03090 ANIA_03095 ANIA_03118 ANI…
0.0354988	6	7	2.88668	Positive regulation of autophagy	http://amigo.geneontology.org/amigo/term/GO:0010508	ANIA_00439 ANIA_01545 ANIA_01867 ANIA_06890 ANIA_09467 ANIA_10956
0.0354988	6	7	2.88668	Peptidyl-arginine modification	http://amigo.geneontology.org/amigo/term/GO:0018195	ANIA_00134 ANIA_03096 ANIA_06072 ANIA_10189 ANIA_10212 ANIA_10526
0.0354988	6	7	2.88668	Peptidyl-arginine methylation	http://amigo.geneontology.org/amigo/term/GO:0018216	ANIA_00134 ANIA_03096 ANIA_06072 ANIA_10189 ANIA_10212 ANIA_10526
0.0354988	6	7	2.88668	Negative regulation of cellular catabolic process	http://amigo.geneontology.org/amigo/term/GO:0031330	ANIA_01867 ANIA_04000 ANIA_04546 ANIA_05982 ANIA_06695 ANIA_10138
0.0354988	6	7	2.88668	Primary alcohol catabolic process	http://amigo.geneontology.org/amigo/term/GO:0034310	ANIA_00554 ANIA_05226 ANIA_08978 ANIA_08979 ANIA_08980 ANIA_08981
0.0354988	6	7	2.88668	Peptidyl-arginine N-methylation	http://amigo.geneontology.org/amigo/term/GO:0035246	ANIA_00134 ANIA_03096 ANIA_06072 ANIA_10189 ANIA_10212 ANIA_10526
0.0354988	6	7	2.88668	Ribonucleoside catabolic process	http://amigo.geneontology.org/amigo/term/GO:0042454	ANIA_00662 ANIA_02494 ANIA_05492 ANIA_06490 ANIA_08571 ANIA_11146
0.0354988	6	7	2.88668	UMP metabolic process	http://amigo.geneontology.org/amigo/term/GO:0046049	ANIA_00565 ANIA_00919 ANIA_05884 ANIA_06157 ANIA_07502 ANIA_10131
0.0354988	6	7	2.88668	Ethanol catabolic process	http://amigo.geneontology.org/amigo/term/GO:0006068	ANIA_00554 ANIA_05226 ANIA_08978 ANIA_08979 ANIA_08980 ANIA_08981
0.0354988	6	7	2.88668	UMP biosynthetic process	http://amigo.geneontology.org/amigo/term/GO:0006222	ANIA_00565 ANIA_00919 ANIA_05884 ANIA_06157 ANIA_07502 ANIA_10131
0.0354988	6	7	2.88668	Guanyl-nucleotide exchange factor complex	http://amigo.geneontology.org/amigo/term/GO:0032045	ANIA_00978 ANIA_01272 ANIA_01283 ANIA_01344 ANIA_06289 ANIA_10459
0.0354988	6	7	2.88668	Arginine N-methyltransferase activity	http://amigo.geneontology.org/amigo/term/GO:0016273	ANIA_00134 ANIA_03096 ANIA_06072 ANIA_10189 ANIA_10212 ANIA_10526
0.0354988	6	7	2.88668	Protein-arginine N-methyltransferase activity	http://amigo.geneontology.org/amigo/term/GO:0016274	ANIA_00134 ANIA_03096 ANIA_06072 ANIA_10189 ANIA_10212 ANIA_10526
0.0354988	6	7	2.88668	Pyrimidine ribonucleoside monophosphate metabolic process	http://amigo.geneontology.org/amigo/term/GO:0009173	ANIA_00565 ANIA_00919 ANIA_05884 ANIA_06157 ANIA_07502 ANIA_10131
0.0354988	6	7	2.88668	Pyrimidine ribonucleoside monophosphate biosynthetic process	http://amigo.geneontology.org/amigo/term/GO:0009174	ANIA_00565 ANIA_00919 ANIA_05884 ANIA_06157 ANIA_07502 ANIA_10131
0.0355496	27	58	1.59527	Regulation of phosphorylation	http://amigo.geneontology.org/amigo/term/GO:0042325	ANIA_01272 ANIA_01668 ANIA_01779 ANIA_02172 ANIA_02211 ANIA_03095 ANIA_03422 ANIA_04066 ANIA_04163 ANIA_04385 ANIA_04571 ANIA_05674 ANIA_05708 ANIA_05719 ANIA_06339 ANIA_06360 ANIA_08079 ANIA_08173 ANIA_08836 ANIA_09095 ANIA_09424 ANIA_10682 ANIA_10734 ANIA_10741 ANIA_10756 ANIA_10854 ANIA_11032
0.03579	16	30	1.85809	Regulation of protein polymerization	http://amigo.geneontology.org/amigo/term/GO:0032271	ANIA_00184 ANIA_00306 ANIA_00673 ANIA_01306 ANIA_01398 ANIA_02126 ANIA_02484 ANIA_04919 ANIA_05778 ANIA_06341 ANIA_08065 ANIA_08496 ANIA_08698 ANIA_08863 ANIA_10397 ANIA_10942
0.03579	22	44	1.6839	Protein modification by small protein removal	http://amigo.geneontology.org/amigo/term/GO:0070646	ANIA_00173 ANIA_00906 ANIA_01491 ANIA_01539 ANIA_02129 ANIA_02233 ANIA_03453 ANIA_03623 ANIA_03711 ANIA_04166 ANIA_04492 ANIA_04783 ANIA_05638 ANIA_05717 ANIA_05798 ANIA_06164 ANIA_07422 ANIA_07491 ANIA_08192 ANIA_10017 ANIA_10456 ANIA_11102
0.0358565	47	114	1.41327	GTP binding	http://amigo.geneontology.org/amigo/term/GO:0005525	ANIA_00347 ANIA_00449 ANIA_00676 ANIA_00804 ANIA_00893 ANIA_00953 ANIA_01085 ANIA_01182 ANIA_01223 ANIA_01394 ANIA_01408 ANIA_01666 ANIA_01911 ANIA_02063 ANIA_02080 ANIA_02244 ANIA_03090 ANIA_03156 ANIA_03171 ANIA_03328 ANIA_03419 ANIA_03434 ANIA_04038 ANIA_04080 ANIA_04167 ANIA_04218 ANIA_04470 ANIA_05518 ANIA_06150 ANIA_06330 ANIA_06522 ANIA_06627 ANIA_06974 ANIA_07206 ANIA_07487 ANIA_07602 ANI…
0.0358565	47	114	1.41327	Guanyl nucleotide binding	http://amigo.geneontology.org/amigo/term/GO:0019001	ANIA_00347 ANIA_00449 ANIA_00676 ANIA_00804 ANIA_00893 ANIA_00953 ANIA_01085 ANIA_01182 ANIA_01223 ANIA_01394 ANIA_01408 ANIA_01666 ANIA_01911 ANIA_02063 ANIA_02080 ANIA_02244 ANIA_03090 ANIA_03156 ANIA_03171 ANIA_03328 ANIA_03419 ANIA_03434 ANIA_04038 ANIA_04080 ANIA_04167 ANIA_04218 ANIA_04470 ANIA_05518 ANIA_06150 ANIA_06330 ANIA_06522 ANIA_06627 ANIA_06974 ANIA_07206 ANIA_07487 ANIA_07602 ANI…
0.0358565	47	114	1.41327	Guanyl ribonucleotide binding	http://amigo.geneontology.org/amigo/term/GO:0032561	ANIA_00347 ANIA_00449 ANIA_00676 ANIA_00804 ANIA_00893 ANIA_00953 ANIA_01085 ANIA_01182 ANIA_01223 ANIA_01394 ANIA_01408 ANIA_01666 ANIA_01911 ANIA_02063 ANIA_02080 ANIA_02244 ANIA_03090 ANIA_03156 ANIA_03171 ANIA_03328 ANIA_03419 ANIA_03434 ANIA_04038 ANIA_04080 ANIA_04167 ANIA_04218 ANIA_04470 ANIA_05518 ANIA_06150 ANIA_06330 ANIA_06522 ANIA_06627 ANIA_06974 ANIA_07206 ANIA_07487 ANIA_07602 ANI…
0.036285	9	13	2.33155	Cellular bud neck	http://amigo.geneontology.org/amigo/term/GO:0005935	ANIA_00410 ANIA_01545 ANIA_03936 ANIA_04085 ANIA_05529 ANIA_06288 ANIA_08862 ANIA_08863 ANIA_09467
0.036285	9	13	2.33155	Regulation of translational initiation	http://amigo.geneontology.org/amigo/term/GO:0006446	ANIA_00167 ANIA_01344 ANIA_01665 ANIA_02246 ANIA_03055 ANIA_03411 ANIA_08173 ANIA_10362 ANIA_10459
0.0367466	18	34	1.78295	Damaged DNA binding	http://amigo.geneontology.org/amigo/term/GO:0003684	ANIA_00138 ANIA_00437 ANIA_00596 ANIA_01479 ANIA_01708 ANIA_02139 ANIA_02304 ANIA_03373 ANIA_03629 ANIA_03749 ANIA_04037 ANIA_04331 ANIA_04552 ANIA_05620 ANIA_06827 ANIA_07423 ANIA_07753 ANIA_09436
0.0377348	13	22	1.99006	Aminopeptidase activity	http://amigo.geneontology.org/amigo/term/GO:0004177	ANIA_01638 ANIA_01780 ANIA_02092 ANIA_02946 ANIA_04282 ANIA_04404 ANIA_05810 ANIA_05812 ANIA_08608 ANIA_10351 ANIA_10540 ANIA_11005 ANIA_11070
0.0377348	13	24	1.99006	Nucleotide excision repair	http://www.genome.jp/kegg-bin/show_pathway?ani03420	ANIA_00596 ANIA_01668 ANIA_02211 ANIA_02446 ANIA_03067 ANIA_04331 ANIA_06300 ANIA_06517 ANIA_07015 ANIA_07308 ANIA_07325 ANIA_07439 ANIA_08064
0.0377348	25	53	1.61913	Vacuole organization	http://amigo.geneontology.org/amigo/term/GO:0007033	ANIA_00127 ANIA_00405 ANIA_00439 ANIA_01545 ANIA_02280 ANIA_02887 ANIA_03061 ANIA_03144 ANIA_04709 ANIA_04832 ANIA_05174 ANIA_06267 ANIA_06360 ANIA_06911 ANIA_07428 ANIA_07602 ANIA_08023 ANIA_08862 ANIA_09467 ANIA_10171 ANIA_10193 ANIA_10213 ANIA_10849 ANIA_11004 ANIA_12408
0.0380895	8	11	2.44931	Protein localization to chromosome	http://amigo.geneontology.org/amigo/term/GO:0034502	ANIA_00410 ANIA_00960 ANIA_01401 ANIA_04804 ANIA_07423 ANIA_07499 ANIA_08865 ANIA_09467
0.0380895	8	11	2.44931	Purine ribonucleoside metabolic process	http://amigo.geneontology.org/amigo/term/GO:0046128	ANIA_00662 ANIA_02494 ANIA_03222 ANIA_05492 ANIA_06072 ANIA_06490 ANIA_09083 ANIA_10230
0.0380895	8	11	2.44931	Aldehyde catabolic process	http://amigo.geneontology.org/amigo/term/GO:0046185	ANIA_00554 ANIA_04174 ANIA_05534 ANIA_06796 ANIA_07632 ANIA_08782 ANIA_08978 ANIA_08979
0.0380895	8	12	2.44931	Exocytic process	http://amigo.geneontology.org/amigo/term/GO:0140029	ANIA_01002 ANIA_02418 ANIA_04724 ANIA_06493 ANIA_06531 ANIA_06974 ANIA_08862 ANIA_11007
0.0380895	8	11	2.44931	Proteasome storage granule	http://amigo.geneontology.org/amigo/term/GO:0034515	ANIA_02085 ANIA_03756 ANIA_05793 ANIA_06547 ANIA_06726 ANIA_08054 ANIA_10020 ANIA_10519
0.0380895	8	12	2.44931	Vesicle docking involved in exocytosis	http://amigo.geneontology.org/amigo/term/GO:0006904	ANIA_01002 ANIA_02418 ANIA_04724 ANIA_06493 ANIA_06531 ANIA_06974 ANIA_08862 ANIA_11007
0.0380896	92	249	1.26982	Organophosphate biosynthetic process	http://amigo.geneontology.org/amigo/term/GO:0090407	ANIA_00156 ANIA_00206 ANIA_00270 ANIA_00490 ANIA_00495 ANIA_00504 ANIA_00565 ANIA_00579 ANIA_00591 ANIA_00636 ANIA_00662 ANIA_00893 ANIA_00906 ANIA_00910 ANIA_00919 ANIA_00947 ANIA_01271 ANIA_01498 ANIA_01694 ANIA_01775 ANIA_01796 ANIA_01857 ANIA_01965 ANIA_02096 ANIA_02240 ANIA_02303 ANIA_02311 ANIA_02327 ANIA_02435 ANIA_02473 ANIA_02762 ANIA_03169 ANIA_03188 ANIA_03276 ANIA_03431 ANIA_03588 ANI…
0.03821	7	9	2.6194	Purine-containing compound salvage	http://amigo.geneontology.org/amigo/term/GO:0043101	ANIA_02494 ANIA_03222 ANIA_05492 ANIA_06078 ANIA_08872 ANIA_09083 ANIA_10230
0.0394994	59	151	1.3517	Negative regulation of nitrogen compound metabolic process	http://amigo.geneontology.org/amigo/term/GO:0051172	ANIA_00486 ANIA_00565 ANIA_00671 ANIA_01132 ANIA_01191 ANIA_01272 ANIA_01400 ANIA_01669 ANIA_01708 ANIA_01812 ANIA_01867 ANIA_01976 ANIA_02021 ANIA_02065 ANIA_02080 ANIA_02141 ANIA_02270 ANIA_02304 ANIA_02765 ANIA_02955 ANIA_03450 ANIA_03578 ANIA_03580 ANIA_03637 ANIA_03667 ANIA_04000 ANIA_04013 ANIA_04166 ANIA_04202 ANIA_04445 ANIA_04546 ANIA_04720 ANIA_04783 ANIA_04965 ANIA_05431 ANIA_05494 ANI…
0.0397083	121	337	1.22742	Positive regulation of cellular biosynthetic process	http://amigo.geneontology.org/amigo/term/GO:0031328	ANIA_00148 ANIA_00202 ANIA_00256 ANIA_00388 ANIA_00486 ANIA_00504 ANIA_00505 ANIA_00554 ANIA_00568 ANIA_00671 ANIA_00807 ANIA_00891 ANIA_01227 ANIA_01303 ANIA_01369 ANIA_01406 ANIA_01494 ANIA_01545 ANIA_01584 ANIA_01779 ANIA_01812 ANIA_02172 ANIA_02211 ANIA_02270 ANIA_02845 ANIA_03050 ANIA_03075 ANIA_03154 ANIA_03217 ANIA_03269 ANIA_03280 ANIA_03290 ANIA_03300 ANIA_03502 ANIA_03580 ANIA_03637 ANI…
0.0397083	121	337	1.22742	Positive regulation of biosynthetic process	http://amigo.geneontology.org/amigo/term/GO:0009891	ANIA_00148 ANIA_00202 ANIA_00256 ANIA_00388 ANIA_00486 ANIA_00504 ANIA_00505 ANIA_00554 ANIA_00568 ANIA_00671 ANIA_00807 ANIA_00891 ANIA_01227 ANIA_01303 ANIA_01369 ANIA_01406 ANIA_01494 ANIA_01545 ANIA_01584 ANIA_01779 ANIA_01812 ANIA_02172 ANIA_02211 ANIA_02270 ANIA_02845 ANIA_03050 ANIA_03075 ANIA_03154 ANIA_03217 ANIA_03269 ANIA_03280 ANIA_03290 ANIA_03300 ANIA_03502 ANIA_03580 ANIA_03637 ANI…
0.0400394	32	71	1.51788	Translational initiation	http://amigo.geneontology.org/amigo/term/GO:0006413	ANIA_00167 ANIA_00872 ANIA_00978 ANIA_01080 ANIA_01344 ANIA_01494 ANIA_01665 ANIA_02246 ANIA_02769 ANIA_02775 ANIA_02907 ANIA_03055 ANIA_03156 ANIA_03411 ANIA_04015 ANIA_04038 ANIA_04259 ANIA_04470 ANIA_04742 ANIA_04838 ANIA_05745 ANIA_06864 ANIA_08066 ANIA_08173 ANIA_08824 ANIA_08883 ANIA_10139 ANIA_10175 ANIA_10362 ANIA_10459 ANIA_10501 ANIA_10535
0.0409541	15	27	1.871	Positive regulation of protein-containing complex assembly	http://amigo.geneontology.org/amigo/term/GO:0031334	ANIA_00184 ANIA_00306 ANIA_00673 ANIA_01306 ANIA_01398 ANIA_03411 ANIA_04236 ANIA_04919 ANIA_05102 ANIA_05778 ANIA_06341 ANIA_06687 ANIA_08065 ANIA_08698 ANIA_08863
0.0409541	15	28	1.871	RNA destabilization	http://amigo.geneontology.org/amigo/term/GO:0050779	ANIA_02065 ANIA_02080 ANIA_04000 ANIA_04965 ANIA_05898 ANIA_06199 ANIA_06587 ANIA_07492 ANIA_07628 ANIA_07746 ANIA_09090 ANIA_10119 ANIA_10121 ANIA_10362 ANIA_10406
0.0409541	15	28	1.871	Positive regulation of mRNA catabolic process	http://amigo.geneontology.org/amigo/term/GO:0061014	ANIA_02065 ANIA_02080 ANIA_04000 ANIA_04965 ANIA_05898 ANIA_06199 ANIA_06587 ANIA_07492 ANIA_07628 ANIA_07746 ANIA_09090 ANIA_10119 ANIA_10121 ANIA_10362 ANIA_10406
0.0409541	15	28	1.871	MRNA destabilization	http://amigo.geneontology.org/amigo/term/GO:0061157	ANIA_02065 ANIA_02080 ANIA_04000 ANIA_04965 ANIA_05898 ANIA_06199 ANIA_06587 ANIA_07492 ANIA_07628 ANIA_07746 ANIA_09090 ANIA_10119 ANIA_10121 ANIA_10362 ANIA_10406
0.0409541	15	27	1.871	Positive regulation of reproductive process	http://amigo.geneontology.org/amigo/term/GO:2000243	ANIA_00641 ANIA_00807 ANIA_01545 ANIA_01661 ANIA_02094 ANIA_02520 ANIA_03090 ANIA_03688 ANIA_03719 ANIA_04163 ANIA_05028 ANIA_05836 ANIA_06505 ANIA_07743 ANIA_09121
0.0409541	15	28	1.871	Actin cortical patch	http://amigo.geneontology.org/amigo/term/GO:0030479	ANIA_00184 ANIA_00317 ANIA_00605 ANIA_00673 ANIA_01023 ANIA_01462 ANIA_02756 ANIA_04168 ANIA_04270 ANIA_04463 ANIA_05778 ANIA_06341 ANIA_08698 ANIA_10288 ANIA_10942
0.0409541	15	28	1.871	Endocytic patch	http://amigo.geneontology.org/amigo/term/GO:0061645	ANIA_00184 ANIA_00317 ANIA_00605 ANIA_00673 ANIA_01023 ANIA_01462 ANIA_02756 ANIA_04168 ANIA_04270 ANIA_04463 ANIA_05778 ANIA_06341 ANIA_08698 ANIA_10288 ANIA_10942
0.0409541	80	214	1.28911	Transcription cis-regulatory region binding	http://amigo.geneontology.org/amigo/term/GO:0000976	ANIA_00148 ANIA_00388 ANIA_00568 ANIA_00671 ANIA_00680 ANIA_01028 ANIA_01152 ANIA_01265 ANIA_01391 ANIA_01494 ANIA_01584 ANIA_01599 ANIA_01812 ANIA_01905 ANIA_01929 ANIA_02270 ANIA_02652 ANIA_02826 ANIA_02955 ANIA_03050 ANIA_03075 ANIA_03217 ANIA_03269 ANIA_03280 ANIA_03300 ANIA_03502 ANIA_03607 ANIA_03667 ANIA_03683 ANIA_03684 ANIA_03688 ANIA_03986 ANIA_04001 ANIA_04123 ANIA_04744 ANIA_04750 ANI…
0.0409541	80	214	1.28911	Transcription regulatory region nucleic acid binding	http://amigo.geneontology.org/amigo/term/GO:0001067	ANIA_00148 ANIA_00388 ANIA_00568 ANIA_00671 ANIA_00680 ANIA_01028 ANIA_01152 ANIA_01265 ANIA_01391 ANIA_01494 ANIA_01584 ANIA_01599 ANIA_01812 ANIA_01905 ANIA_01929 ANIA_02270 ANIA_02652 ANIA_02826 ANIA_02955 ANIA_03050 ANIA_03075 ANIA_03217 ANIA_03269 ANIA_03280 ANIA_03300 ANIA_03502 ANIA_03607 ANIA_03667 ANIA_03683 ANIA_03684 ANIA_03688 ANIA_03986 ANIA_04001 ANIA_04123 ANIA_04744 ANIA_04750 ANI…
0.0409541	21	43	1.6839	L-amino acid transmembrane transporter activity	http://amigo.geneontology.org/amigo/term/GO:0015179	ANIA_00275 ANIA_00856 ANIA_01061 ANIA_02043 ANIA_02287 ANIA_02560 ANIA_02962 ANIA_03081 ANIA_03304 ANIA_03347 ANIA_04124 ANIA_04250 ANIA_05968 ANIA_06118 ANIA_07777 ANIA_08538 ANIA_08726 ANIA_08881 ANIA_09441 ANIA_10319 ANIA_10905
0.0409541	15	28	1.871	Nuclear-transcribed mRNA catabolic process, deadenylation-dependent decay	http://amigo.geneontology.org/amigo/term/GO:0000288	ANIA_02065 ANIA_02080 ANIA_04000 ANIA_04965 ANIA_05898 ANIA_06199 ANIA_06587 ANIA_07492 ANIA_07628 ANIA_07746 ANIA_09090 ANIA_10119 ANIA_10121 ANIA_10362 ANIA_10406
0.0424136	17	32	1.78914	Positive regulation of cell cycle process	http://amigo.geneontology.org/amigo/term/GO:0090068	ANIA_00410 ANIA_00807 ANIA_00872 ANIA_00905 ANIA_01398 ANIA_01545 ANIA_01661 ANIA_01779 ANIA_03719 ANIA_04735 ANIA_05028 ANIA_05820 ANIA_06288 ANIA_06505 ANIA_07499 ANIA_08013 ANIA_09121
0.0424136	17	33	1.78914	Protein kinase regulator activity	http://amigo.geneontology.org/amigo/term/GO:0019887	ANIA_01272 ANIA_01668 ANIA_01779 ANIA_02172 ANIA_02211 ANIA_03095 ANIA_04066 ANIA_05708 ANIA_05719 ANIA_06288 ANIA_06360 ANIA_08079 ANIA_08173 ANIA_09424 ANIA_10734 ANIA_10741 ANIA_10854
0.0424203	12	20	2.02068	Regulation of sexual sporulation	http://amigo.geneontology.org/amigo/term/GO:0034306	ANIA_00807 ANIA_01359 ANIA_01661 ANIA_01967 ANIA_02059 ANIA_03090 ANIA_03719 ANIA_05028 ANIA_06505 ANIA_06578 ANIA_06749 ANIA_09121
0.0424203	12	20	2.02068	Regulation of sexual sporulation resulting in formation of a cellular spore	http://amigo.geneontology.org/amigo/term/GO:0043940	ANIA_00807 ANIA_01359 ANIA_01661 ANIA_01967 ANIA_02059 ANIA_03090 ANIA_03719 ANIA_05028 ANIA_06505 ANIA_06578 ANIA_06749 ANIA_09121
0.0424203	12	22	2.02068	Vesicle docking	http://amigo.geneontology.org/amigo/term/GO:0048278	ANIA_00706 ANIA_01002 ANIA_02418 ANIA_03098 ANIA_04724 ANIA_06493 ANIA_06531 ANIA_06974 ANIA_08862 ANIA_08879 ANIA_10061 ANIA_11007
0.0424203	12	20	2.02068	Metalloexopeptidase activity	http://amigo.geneontology.org/amigo/term/GO:0008235	ANIA_00224 ANIA_01638 ANIA_01780 ANIA_03459 ANIA_04282 ANIA_04404 ANIA_05810 ANIA_05812 ANIA_10351 ANIA_10540 ANIA_11005 ANIA_11070
0.0465686	31	70	1.51307	Ubiquitin ligase complex	http://amigo.geneontology.org/amigo/term/GO:0000151	ANIA_00596 ANIA_00810 ANIA_00883 ANIA_00905 ANIA_00911 ANIA_01208 ANIA_02214 ANIA_02302 ANIA_02761 ANIA_02772 ANIA_02961 ANIA_03939 ANIA_04037 ANIA_04535 ANIA_04735 ANIA_04800 ANIA_06261 ANIA_07259 ANIA_07577 ANIA_08013 ANIA_09113 ANIA_09320 ANIA_09424 ANIA_10008 ANIA_10268 ANIA_10363 ANIA_10365 ANIA_10434 ANIA_10516 ANIA_10556 ANIA_11004
0.0465686	22	45	1.64648	Kinetochore	http://amigo.geneontology.org/amigo/term/GO:0000776	ANIA_00143 ANIA_00166 ANIA_00960 ANIA_01056 ANIA_01398 ANIA_01401 ANIA_01432 ANIA_01977 ANIA_02439 ANIA_02886 ANIA_03187 ANIA_03710 ANIA_04804 ANIA_04961 ANIA_05521 ANIA_06224 ANIA_06600 ANIA_07048 ANIA_08263 ANIA_08719 ANIA_09435 ANIA_09467
0.0467093	82	216	1.27852	Proteolysis involved in cellular protein catabolic process	http://amigo.geneontology.org/amigo/term/GO:0051603	ANIA_00084 ANIA_00551 ANIA_00596 ANIA_00810 ANIA_00883 ANIA_00905 ANIA_00911 ANIA_01167 ANIA_01293 ANIA_01658 ANIA_01757 ANIA_01909 ANIA_02066 ANIA_02085 ANIA_02237 ANIA_02240 ANIA_02302 ANIA_02304 ANIA_02413 ANIA_02761 ANIA_02961 ANIA_02972 ANIA_03054 ANIA_03450 ANIA_03453 ANIA_03493 ANIA_03711 ANIA_03716 ANIA_03733 ANIA_03756 ANIA_03764 ANIA_03932 ANIA_03939 ANIA_03999 ANIA_04037 ANIA_04236 ANI…
0.047955	28	61	1.54587	TRNA modification	http://amigo.geneontology.org/amigo/term/GO:0006400	ANIA_00128 ANIA_00130 ANIA_00191 ANIA_00502 ANIA_00504 ANIA_00804 ANIA_00956 ANIA_01385 ANIA_01751 ANIA_02190 ANIA_02327 ANIA_02499 ANIA_04786 ANIA_05119 ANIA_06165 ANIA_06349 ANIA_06522 ANIA_06569 ANIA_06604 ANIA_07028 ANIA_08066 ANIA_08214 ANIA_08721 ANIA_08799 ANIA_09419 ANIA_10248 ANIA_10450 ANIA_10832
0.0489643	20	41	1.6839	Regulation of actin cytoskeleton organization	http://amigo.geneontology.org/amigo/term/GO:0032956	ANIA_00184 ANIA_00306 ANIA_00410 ANIA_00504 ANIA_00673 ANIA_01306 ANIA_02126 ANIA_02484 ANIA_03171 ANIA_04919 ANIA_04998 ANIA_05778 ANIA_06341 ANIA_08065 ANIA_08496 ANIA_08698 ANIA_09463 ANIA_10397 ANIA_10756 ANIA_10942
0.0489643	20	41	1.6839	Regulation of actin filament-based process	http://amigo.geneontology.org/amigo/term/GO:0032970	ANIA_00184 ANIA_00306 ANIA_00410 ANIA_00504 ANIA_00673 ANIA_01306 ANIA_02126 ANIA_02484 ANIA_03171 ANIA_04919 ANIA_04998 ANIA_05778 ANIA_06341 ANIA_08065 ANIA_08496 ANIA_08698 ANIA_09463 ANIA_10397 ANIA_10756 ANIA_10942
0.0494115	11	18	2.0581	Nucleobase biosynthetic process	http://amigo.geneontology.org/amigo/term/GO:0046112	ANIA_00490 ANIA_00565 ANIA_00919 ANIA_02494 ANIA_05492 ANIA_05884 ANIA_06078 ANIA_06157 ANIA_06541 ANIA_09083 ANIA_10131
0.0494115	11	18	2.0581	G1/S transition of mitotic cell cycle	http://amigo.geneontology.org/amigo/term/GO:0000082	ANIA_00084 ANIA_00504 ANIA_00872 ANIA_01867 ANIA_03154 ANIA_03450 ANIA_04182 ANIA_04271 ANIA_05820 ANIA_08092 ANIA_08820
0.0494115	11	18	2.0581	Site of double-strand break	http://amigo.geneontology.org/amigo/term/GO:0035861	ANIA_00556 ANIA_00582 ANIA_01237 ANIA_02214 ANIA_03619 ANIA_05494 ANIA_06616 ANIA_06827 ANIA_07423 ANIA_10414 ANIA_10755
0.0494115	11	18	2.0581	Site of DNA damage	http://amigo.geneontology.org/amigo/term/GO:0090734	ANIA_00556 ANIA_00582 ANIA_01237 ANIA_02214 ANIA_03619 ANIA_05494 ANIA_06616 ANIA_06827 ANIA_07423 ANIA_10414 ANIA_10755
0.0494115	11	18	2.0581	DNA replication origin binding	http://amigo.geneontology.org/amigo/term/GO:0003688	ANIA_00872 ANIA_01207 ANIA_01259 ANIA_01435 ANIA_02491 ANIA_03040 ANIA_05892 ANIA_05992 ANIA_10072 ANIA_10497 ANIA_10755
Sorbitol vs. Untreated	A. nidulans	THS30	upregulated genes	DEG; log2FC>2
Enrichment FDR	nGenes	Pathway Genes	Fold Enrichment	Pathway	URL	Genes
0.000244728	82	846	1.77386	Transmembrane transport	http://amigo.geneontology.org/amigo/term/GO:0055085	ANIA_00015 ANIA_00029 ANIA_00208 ANIA_00209 ANIA_00501 ANIA_00528 ANIA_00601 ANIA_00771 ANIA_00811 ANIA_01472 ANIA_01577 ANIA_02062 ANIA_02300 ANIA_02368 ANIA_02465 ANIA_02475 ANIA_02544 ANIA_02665 ANIA_02707 ANIA_02822 ANIA_02831 ANIA_02841 ANIA_02864 ANIA_03287 ANIA_03357 ANIA_03503 ANIA_03681 ANIA_03722 ANIA_03781 ANIA_03876 ANIA_03915 ANIA_04106 ANIA_04109 ANIA_04148 ANIA_04157 ANIA_04277 ANI…
0.000259805	81	855	1.73348	Transporter activity	http://amigo.geneontology.org/amigo/term/GO:0005215	ANIA_00015 ANIA_00029 ANIA_00208 ANIA_00209 ANIA_00501 ANIA_00528 ANIA_00601 ANIA_00771 ANIA_00811 ANIA_01472 ANIA_01577 ANIA_02300 ANIA_02368 ANIA_02465 ANIA_02475 ANIA_02544 ANIA_02665 ANIA_02676 ANIA_02707 ANIA_02822 ANIA_02831 ANIA_02841 ANIA_02864 ANIA_03287 ANIA_03357 ANIA_03503 ANIA_03681 ANIA_03722 ANIA_03781 ANIA_03876 ANIA_03915 ANIA_04106 ANIA_04109 ANIA_04148 ANIA_04157 ANIA_04277 ANI…
0.000259805	79	824	1.75538	Transmembrane transporter activity	http://amigo.geneontology.org/amigo/term/GO:0022857	ANIA_00015 ANIA_00029 ANIA_00208 ANIA_00209 ANIA_00501 ANIA_00528 ANIA_00601 ANIA_00771 ANIA_00811 ANIA_01472 ANIA_01577 ANIA_02300 ANIA_02368 ANIA_02465 ANIA_02475 ANIA_02544 ANIA_02665 ANIA_02707 ANIA_02822 ANIA_02831 ANIA_02841 ANIA_02864 ANIA_03287 ANIA_03357 ANIA_03503 ANIA_03681 ANIA_03722 ANIA_03781 ANIA_03876 ANIA_03915 ANIA_04106 ANIA_04109 ANIA_04148 ANIA_04157 ANIA_04277 ANIA_04482 ANI…
Sorbitol vs. Untreated	A. nidulans	THS30	upregulated genes	DEG; log2FC>1
No significant enrichment found
Sorbitol vs. Untreated	A. nidulans	THS30	upregulated genes	DEG
Enrichment FDR	nGenes	Pathway Genes	Fold Enrichment	Pathway	URL	Genes
7.52079e-19	331	696	1.54661	Mitochondrion	http://amigo.geneontology.org/amigo/term/GO:0005739	ANIA_00040 ANIA_00066 ANIA_00116 ANIA_00123 ANIA_00252 ANIA_00346 ANIA_00357 ANIA_00432 ANIA_00447 ANIA_00470 ANIA_00559 ANIA_00604 ANIA_00630 ANIA_00670 ANIA_00686 ANIA_00716 ANIA_00747 ANIA_00821 ANIA_00824 ANIA_00859 ANIA_00870 ANIA_00896 ANIA_00932 ANIA_00943 ANIA_00952 ANIA_01022 ANIA_01059 ANIA_01063 ANIA_01066 ANIA_01074 ANIA_01083 ANIA_01084 ANIA_01093 ANIA_01095 ANIA_01104 ANIA_01105 ANI…
7.52079e-19	103	148	2.24051	Mitochondrial protein-containing complex	http://amigo.geneontology.org/amigo/term/GO:0098798	ANIA_00040 ANIA_00116 ANIA_00123 ANIA_00252 ANIA_00357 ANIA_00470 ANIA_00559 ANIA_00747 ANIA_00821 ANIA_00896 ANIA_00943 ANIA_01063 ANIA_01095 ANIA_01105 ANIA_01347 ANIA_01534 ANIA_01624 ANIA_01636 ANIA_01770 ANIA_01892 ANIA_01954 ANIA_01970 ANIA_02055 ANIA_02057 ANIA_02306 ANIA_02315 ANIA_02316 ANIA_02916 ANIA_02949 ANIA_03173 ANIA_03458 ANIA_03635 ANIA_03744 ANIA_03803 ANIA_03922 ANIA_04162 ANI…
1.06363e-16	161	285	1.83152	Mitochondrial envelope	http://amigo.geneontology.org/amigo/term/GO:0005740	ANIA_00066 ANIA_00252 ANIA_00346 ANIA_00357 ANIA_00432 ANIA_00559 ANIA_00670 ANIA_00686 ANIA_00716 ANIA_00747 ANIA_00821 ANIA_00870 ANIA_00896 ANIA_00943 ANIA_01022 ANIA_01063 ANIA_01066 ANIA_01093 ANIA_01104 ANIA_01105 ANIA_01231 ANIA_01269 ANIA_01281 ANIA_01347 ANIA_01376 ANIA_01534 ANIA_01624 ANIA_01753 ANIA_01892 ANIA_01912 ANIA_01915 ANIA_01999 ANIA_02055 ANIA_02173 ANIA_02261 ANIA_02306 ANI…
1.67091e-15	129	216	1.92268	Organelle inner membrane	http://amigo.geneontology.org/amigo/term/GO:0019866	ANIA_00066 ANIA_00162 ANIA_00252 ANIA_00346 ANIA_00357 ANIA_00686 ANIA_00716 ANIA_00747 ANIA_00870 ANIA_00896 ANIA_00943 ANIA_01022 ANIA_01063 ANIA_01066 ANIA_01093 ANIA_01104 ANIA_01231 ANIA_01269 ANIA_01281 ANIA_01347 ANIA_01534 ANIA_01624 ANIA_01892 ANIA_01915 ANIA_01999 ANIA_02173 ANIA_02306 ANIA_02315 ANIA_02316 ANIA_02332 ANIA_02916 ANIA_02939 ANIA_03011 ANIA_03068 ANIA_03586 ANIA_03663 ANI…
2.69483e-15	149	265	1.82391	Mitochondrial membrane	http://amigo.geneontology.org/amigo/term/GO:0031966	ANIA_00066 ANIA_00252 ANIA_00346 ANIA_00357 ANIA_00432 ANIA_00559 ANIA_00686 ANIA_00716 ANIA_00747 ANIA_00821 ANIA_00870 ANIA_00896 ANIA_00943 ANIA_01022 ANIA_01063 ANIA_01066 ANIA_01093 ANIA_01104 ANIA_01105 ANIA_01231 ANIA_01269 ANIA_01281 ANIA_01347 ANIA_01376 ANIA_01534 ANIA_01624 ANIA_01753 ANIA_01892 ANIA_01912 ANIA_01915 ANIA_01999 ANIA_02055 ANIA_02173 ANIA_02261 ANIA_02306 ANIA_02315 ANI…
2.85478e-15	126	211	1.92247	Mitochondrial inner membrane	http://amigo.geneontology.org/amigo/term/GO:0005743	ANIA_00066 ANIA_00252 ANIA_00346 ANIA_00357 ANIA_00686 ANIA_00716 ANIA_00747 ANIA_00870 ANIA_00896 ANIA_00943 ANIA_01022 ANIA_01063 ANIA_01066 ANIA_01093 ANIA_01104 ANIA_01231 ANIA_01269 ANIA_01281 ANIA_01347 ANIA_01534 ANIA_01624 ANIA_01892 ANIA_01915 ANIA_01999 ANIA_02173 ANIA_02306 ANIA_02315 ANIA_02316 ANIA_02332 ANIA_02916 ANIA_02939 ANIA_03011 ANIA_03068 ANIA_03586 ANIA_03663 ANIA_03738 ANI…
3.28491e-13	182	357	1.6505	Organelle envelope	http://amigo.geneontology.org/amigo/term/GO:0031967	ANIA_00066 ANIA_00162 ANIA_00252 ANIA_00295 ANIA_00346 ANIA_00357 ANIA_00432 ANIA_00559 ANIA_00670 ANIA_00686 ANIA_00716 ANIA_00747 ANIA_00821 ANIA_00858 ANIA_00870 ANIA_00896 ANIA_00943 ANIA_01022 ANIA_01063 ANIA_01064 ANIA_01066 ANIA_01093 ANIA_01104 ANIA_01105 ANIA_01231 ANIA_01269 ANIA_01281 ANIA_01347 ANIA_01357 ANIA_01376 ANIA_01534 ANIA_01624 ANIA_01753 ANIA_01771 ANIA_01892 ANIA_01912 ANI…
3.28491e-13	182	357	1.6505	Envelope	http://amigo.geneontology.org/amigo/term/GO:0031975	ANIA_00066 ANIA_00162 ANIA_00252 ANIA_00295 ANIA_00346 ANIA_00357 ANIA_00432 ANIA_00559 ANIA_00670 ANIA_00686 ANIA_00716 ANIA_00747 ANIA_00821 ANIA_00858 ANIA_00870 ANIA_00896 ANIA_00943 ANIA_01022 ANIA_01063 ANIA_01064 ANIA_01066 ANIA_01093 ANIA_01104 ANIA_01105 ANIA_01231 ANIA_01269 ANIA_01281 ANIA_01347 ANIA_01357 ANIA_01376 ANIA_01534 ANIA_01624 ANIA_01753 ANIA_01771 ANIA_01892 ANIA_01912 ANI…
2.74192e-12	53	69	2.47286	Inner mitochondrial membrane protein complex	http://amigo.geneontology.org/amigo/term/GO:0098800	ANIA_00252 ANIA_00357 ANIA_00747 ANIA_00896 ANIA_00943 ANIA_01063 ANIA_01347 ANIA_01534 ANIA_01624 ANIA_01892 ANIA_02306 ANIA_02315 ANIA_02316 ANIA_02916 ANIA_03922 ANIA_04162 ANIA_04288 ANIA_04388 ANIA_04490 ANIA_04557 ANIA_04559 ANIA_04633 ANIA_04927 ANIA_05597 ANIA_05693 ANIA_05969 ANIA_06248 ANIA_06255 ANIA_06287 ANIA_06348 ANIA_06631 ANIA_06841 ANIA_07561 ANIA_07629 ANIA_07649 ANIA_08049 ANI…
1.6585e-07	59	95	1.9994	Mitochondrial transport	http://amigo.geneontology.org/amigo/term/GO:0006839	ANIA_00066 ANIA_00346 ANIA_00357 ANIA_00559 ANIA_00747 ANIA_00821 ANIA_00870 ANIA_01104 ANIA_01105 ANIA_01269 ANIA_01281 ANIA_01892 ANIA_02057 ANIA_02173 ANIA_02315 ANIA_02432 ANIA_02567 ANIA_02939 ANIA_03663 ANIA_03803 ANIA_04064 ANIA_04280 ANIA_04352 ANIA_04387 ANIA_04490 ANIA_04559 ANIA_04633 ANIA_05132 ANIA_05298 ANIA_05356 ANIA_05693 ANIA_06087 ANIA_06089 ANIA_06248 ANIA_06254 ANIA_06279 ANI…
3.23433e-07	51	79	2.07833	ATP metabolic process	http://amigo.geneontology.org/amigo/term/GO:0046034	ANIA_00252 ANIA_00357 ANIA_00747 ANIA_00896 ANIA_00943 ANIA_01063 ANIA_01202 ANIA_01523 ANIA_01534 ANIA_01624 ANIA_01918 ANIA_02306 ANIA_02315 ANIA_02316 ANIA_02414 ANIA_02638 ANIA_02916 ANIA_03059 ANIA_03223 ANIA_03922 ANIA_04164 ANIA_04255 ANIA_04288 ANIA_04388 ANIA_04740 ANIA_04859 ANIA_04927 ANIA_05083 ANIA_05597 ANIA_05606 ANIA_05629 ANIA_05703 ANIA_05969 ANIA_06246 ANIA_06287 ANIA_06631 ANI…
3.38337e-07	20	21	3.06607	Energy coupled proton transport, down electrochemical gradient	http://amigo.geneontology.org/amigo/term/GO:0015985	ANIA_00252 ANIA_00357 ANIA_00943 ANIA_01523 ANIA_01534 ANIA_01624 ANIA_02315 ANIA_04927 ANIA_05083 ANIA_05606 ANIA_06287 ANIA_06631 ANIA_10032 ANIA_10047 ANIA_10626 ANIA_11303 ANIA_11444 ANIA_11499 ANIA_11543 ANIA_11565
3.38337e-07	20	21	3.06607	ATP synthesis coupled proton transport	http://amigo.geneontology.org/amigo/term/GO:0015986	ANIA_00252 ANIA_00357 ANIA_00943 ANIA_01523 ANIA_01534 ANIA_01624 ANIA_02315 ANIA_04927 ANIA_05083 ANIA_05606 ANIA_06287 ANIA_06631 ANIA_10032 ANIA_10047 ANIA_10626 ANIA_11303 ANIA_11444 ANIA_11499 ANIA_11543 ANIA_11565
7.16185e-07	17	17	3.21938	Proton-transporting ATP synthase complex	http://amigo.geneontology.org/amigo/term/GO:0045259	ANIA_00252 ANIA_00943 ANIA_01523 ANIA_01534 ANIA_01624 ANIA_02315 ANIA_04927 ANIA_06287 ANIA_06631 ANIA_10032 ANIA_10047 ANIA_10626 ANIA_11303 ANIA_11444 ANIA_11499 ANIA_11543 ANIA_11565
7.66228e-07	36	50	2.31795	Organellar ribosome	http://amigo.geneontology.org/amigo/term/GO:0000313	ANIA_00116 ANIA_00123 ANIA_00470 ANIA_01095 ANIA_01636 ANIA_01770 ANIA_01954 ANIA_01970 ANIA_02057 ANIA_02949 ANIA_03173 ANIA_03458 ANIA_03635 ANIA_03744 ANIA_04251 ANIA_04308 ANIA_04611 ANIA_04613 ANIA_04652 ANIA_04730 ANIA_05164 ANIA_05203 ANIA_05897 ANIA_06039 ANIA_06302 ANIA_06564 ANIA_06891 ANIA_06904 ANIA_07449 ANIA_07699 ANIA_07701 ANIA_08794 ANIA_09469 ANIA_10161 ANIA_10922 ANIA_11631
7.66228e-07	36	50	2.31795	Mitochondrial ribosome	http://amigo.geneontology.org/amigo/term/GO:0005761	ANIA_00116 ANIA_00123 ANIA_00470 ANIA_01095 ANIA_01636 ANIA_01770 ANIA_01954 ANIA_01970 ANIA_02057 ANIA_02949 ANIA_03173 ANIA_03458 ANIA_03635 ANIA_03744 ANIA_04251 ANIA_04308 ANIA_04611 ANIA_04613 ANIA_04652 ANIA_04730 ANIA_05164 ANIA_05203 ANIA_05897 ANIA_06039 ANIA_06302 ANIA_06564 ANIA_06891 ANIA_06904 ANIA_07449 ANIA_07699 ANIA_07701 ANIA_08794 ANIA_09469 ANIA_10161 ANIA_10922 ANIA_11631
7.66228e-07	21	23	2.93943	ATP biosynthetic process	http://amigo.geneontology.org/amigo/term/GO:0006754	ANIA_00252 ANIA_00357 ANIA_00943 ANIA_01523 ANIA_01534 ANIA_01624 ANIA_02315 ANIA_04859 ANIA_04927 ANIA_05083 ANIA_05606 ANIA_06287 ANIA_06631 ANIA_10032 ANIA_10047 ANIA_10626 ANIA_11303 ANIA_11444 ANIA_11499 ANIA_11543 ANIA_11565
1.18501e-06	320	803	1.29912	Organelle membrane	http://amigo.geneontology.org/amigo/term/GO:0031090	ANIA_00015 ANIA_00066 ANIA_00090 ANIA_00104 ANIA_00162 ANIA_00225 ANIA_00252 ANIA_00295 ANIA_00315 ANIA_00346 ANIA_00357 ANIA_00367 ANIA_00417 ANIA_00432 ANIA_00528 ANIA_00559 ANIA_00627 ANIA_00686 ANIA_00700 ANIA_00716 ANIA_00732 ANIA_00747 ANIA_00762 ANIA_00787 ANIA_00803 ANIA_00819 ANIA_00821 ANIA_00827 ANIA_00831 ANIA_00834 ANIA_00870 ANIA_00896 ANIA_00943 ANIA_00981 ANIA_01014 ANIA_01022 ANI…
1.48937e-06	26	32	2.61574	Oxidative phosphorylation	http://amigo.geneontology.org/amigo/term/GO:0006119	ANIA_00357 ANIA_00747 ANIA_00896 ANIA_01063 ANIA_02306 ANIA_02315 ANIA_02316 ANIA_02414 ANIA_02916 ANIA_03922 ANIA_04164 ANIA_04288 ANIA_04388 ANIA_04740 ANIA_05597 ANIA_05629 ANIA_05703 ANIA_05969 ANIA_06246 ANIA_06287 ANIA_07500 ANIA_08049 ANIA_08118 ANIA_08793 ANIA_10553 ANIA_10585
1.89244e-06	23	29	2.74243	Purine nucleoside triphosphate metabolic process	http://amigo.geneontology.org/amigo/term/GO:0009144	ANIA_00252 ANIA_00357 ANIA_00943 ANIA_01202 ANIA_01523 ANIA_01534 ANIA_01624 ANIA_02315 ANIA_03331 ANIA_04859 ANIA_04927 ANIA_05083 ANIA_05606 ANIA_06287 ANIA_06631 ANIA_10032 ANIA_10047 ANIA_10626 ANIA_11303 ANIA_11444 ANIA_11499 ANIA_11543 ANIA_11565
2.7573e-06	83	160	1.69119	Mitochondrion organization	http://amigo.geneontology.org/amigo/term/GO:0007005	ANIA_00559 ANIA_00604 ANIA_00747 ANIA_00821 ANIA_01066 ANIA_01093 ANIA_01104 ANIA_01105 ANIA_01163 ANIA_01281 ANIA_01347 ANIA_01760 ANIA_01892 ANIA_01912 ANIA_01986 ANIA_02055 ANIA_02076 ANIA_02432 ANIA_02939 ANIA_03068 ANIA_03758 ANIA_03803 ANIA_03831 ANIA_03922 ANIA_03928 ANIA_04064 ANIA_04164 ANIA_04388 ANIA_04490 ANIA_04557 ANIA_04559 ANIA_04633 ANIA_04740 ANIA_04755 ANIA_04842 ANIA_04863 ANI…
2.83229e-06	21	26	2.81696	Purine nucleoside triphosphate biosynthetic process	http://amigo.geneontology.org/amigo/term/GO:0009145	ANIA_00252 ANIA_00357 ANIA_00943 ANIA_01523 ANIA_01534 ANIA_01624 ANIA_02315 ANIA_04859 ANIA_04927 ANIA_05083 ANIA_05606 ANIA_06287 ANIA_06631 ANIA_10032 ANIA_10047 ANIA_10626 ANIA_11303 ANIA_11444 ANIA_11499 ANIA_11543 ANIA_11565
2.83229e-06	21	26	2.81696	Purine ribonucleoside triphosphate biosynthetic process	http://amigo.geneontology.org/amigo/term/GO:0009206	ANIA_00252 ANIA_00357 ANIA_00943 ANIA_01523 ANIA_01534 ANIA_01624 ANIA_02315 ANIA_04859 ANIA_04927 ANIA_05083 ANIA_05606 ANIA_06287 ANIA_06631 ANIA_10032 ANIA_10047 ANIA_10626 ANIA_11303 ANIA_11444 ANIA_11499 ANIA_11543 ANIA_11565
4.36017e-06	15	15	3.21938	Mitochondrial proton-transporting ATP synthase complex	http://amigo.geneontology.org/amigo/term/GO:0005753	ANIA_00252 ANIA_00943 ANIA_01534 ANIA_01624 ANIA_02315 ANIA_04927 ANIA_06287 ANIA_06631 ANIA_10032 ANIA_10047 ANIA_11303 ANIA_11444 ANIA_11499 ANIA_11543 ANIA_11565
5.11954e-06	68	124	1.76547	Mitochondrial matrix	http://amigo.geneontology.org/amigo/term/GO:0005759	ANIA_00040 ANIA_00116 ANIA_00123 ANIA_00470 ANIA_00747 ANIA_01095 ANIA_01163 ANIA_01636 ANIA_01770 ANIA_01954 ANIA_01970 ANIA_02057 ANIA_02432 ANIA_02949 ANIA_03034 ANIA_03173 ANIA_03458 ANIA_03635 ANIA_03744 ANIA_03853 ANIA_04164 ANIA_04251 ANIA_04304 ANIA_04308 ANIA_04409 ANIA_04430 ANIA_04559 ANIA_04611 ANIA_04613 ANIA_04652 ANIA_04655 ANIA_04730 ANIA_04977 ANIA_05164 ANIA_05203 ANIA_05571 ANI…
5.53159e-06	23	28	2.64449	Aerobic electron transport chain	http://amigo.geneontology.org/amigo/term/GO:0019646	ANIA_00357 ANIA_00747 ANIA_00896 ANIA_01063 ANIA_02306 ANIA_02316 ANIA_02414 ANIA_02916 ANIA_03922 ANIA_04164 ANIA_04388 ANIA_04740 ANIA_05597 ANIA_05629 ANIA_05703 ANIA_05969 ANIA_06246 ANIA_07500 ANIA_08049 ANIA_08118 ANIA_08793 ANIA_10553 ANIA_10585
5.53159e-06	23	28	2.64449	ATP synthesis coupled electron transport	http://amigo.geneontology.org/amigo/term/GO:0042773	ANIA_00357 ANIA_00747 ANIA_00896 ANIA_01063 ANIA_02306 ANIA_02316 ANIA_02414 ANIA_02916 ANIA_03922 ANIA_04164 ANIA_04288 ANIA_04388 ANIA_04740 ANIA_05597 ANIA_05629 ANIA_05703 ANIA_05969 ANIA_06246 ANIA_08049 ANIA_08118 ANIA_08793 ANIA_10553 ANIA_10585
1.026e-05	21	27	2.70428	Purine ribonucleoside triphosphate metabolic process	http://amigo.geneontology.org/amigo/term/GO:0009205	ANIA_00252 ANIA_00357 ANIA_00943 ANIA_01523 ANIA_01534 ANIA_01624 ANIA_02315 ANIA_04859 ANIA_04927 ANIA_05083 ANIA_05606 ANIA_06287 ANIA_06631 ANIA_10032 ANIA_10047 ANIA_10626 ANIA_11303 ANIA_11444 ANIA_11499 ANIA_11543 ANIA_11565
1.17817e-05	28	38	2.37217	Respiratory electron transport chain	http://amigo.geneontology.org/amigo/term/GO:0022904	ANIA_00357 ANIA_00394 ANIA_00747 ANIA_00896 ANIA_01063 ANIA_02306 ANIA_02316 ANIA_02332 ANIA_02414 ANIA_02916 ANIA_03922 ANIA_04164 ANIA_04288 ANIA_04388 ANIA_04740 ANIA_04977 ANIA_05597 ANIA_05629 ANIA_05703 ANIA_05969 ANIA_06246 ANIA_07500 ANIA_08049 ANIA_08118 ANIA_08785 ANIA_08793 ANIA_10553 ANIA_10585
1.28522e-05	22	27	2.6232	Mitochondrial ATP synthesis coupled electron transport	http://amigo.geneontology.org/amigo/term/GO:0042775	ANIA_00357 ANIA_00747 ANIA_00896 ANIA_01063 ANIA_02306 ANIA_02316 ANIA_02414 ANIA_02916 ANIA_03922 ANIA_04164 ANIA_04388 ANIA_04740 ANIA_05597 ANIA_05629 ANIA_05703 ANIA_05969 ANIA_06246 ANIA_08049 ANIA_08118 ANIA_08793 ANIA_10553 ANIA_10585
1.28522e-05	22	29	2.6232	Ribonucleoside triphosphate biosynthetic process	http://amigo.geneontology.org/amigo/term/GO:0009201	ANIA_00252 ANIA_00357 ANIA_00943 ANIA_01523 ANIA_01534 ANIA_01624 ANIA_02315 ANIA_04859 ANIA_04927 ANIA_05083 ANIA_05606 ANIA_05999 ANIA_06287 ANIA_06631 ANIA_10032 ANIA_10047 ANIA_10626 ANIA_11303 ANIA_11444 ANIA_11499 ANIA_11543 ANIA_11565
2.70642e-05	30	43	2.24608	Respirasome	http://amigo.geneontology.org/amigo/term/GO:0070469	ANIA_00357 ANIA_00747 ANIA_00896 ANIA_01063 ANIA_01066 ANIA_02306 ANIA_02316 ANIA_02916 ANIA_03011 ANIA_03922 ANIA_04288 ANIA_04388 ANIA_05597 ANIA_05629 ANIA_05969 ANIA_06246 ANIA_06255 ANIA_06557 ANIA_07561 ANIA_07629 ANIA_08049 ANIA_08118 ANIA_08763 ANIA_08793 ANIA_09078 ANIA_10229 ANIA_10525 ANIA_10553 ANIA_10585 ANIA_11377
3.46262e-05	119	260	1.47917	Inorganic ion transmembrane transport	http://amigo.geneontology.org/amigo/term/GO:0098660	ANIA_00209 ANIA_00252 ANIA_00357 ANIA_00501 ANIA_00601 ANIA_00713 ANIA_00747 ANIA_00870 ANIA_00943 ANIA_01022 ANIA_01181 ANIA_01189 ANIA_01290 ANIA_01523 ANIA_01534 ANIA_01577 ANIA_01624 ANIA_01628 ANIA_01795 ANIA_01833 ANIA_02218 ANIA_02308 ANIA_02315 ANIA_02316 ANIA_02368 ANIA_02466 ANIA_02475 ANIA_02477 ANIA_02544 ANIA_02585 ANIA_02665 ANIA_02730 ANIA_02892 ANIA_02939 ANIA_02958 ANIA_02974 ANI…
3.85781e-05	22	30	2.52951	Ribonucleoside triphosphate metabolic process	http://amigo.geneontology.org/amigo/term/GO:0009199	ANIA_00252 ANIA_00357 ANIA_00943 ANIA_01523 ANIA_01534 ANIA_01624 ANIA_02315 ANIA_04859 ANIA_04927 ANIA_05083 ANIA_05606 ANIA_05999 ANIA_06287 ANIA_06631 ANIA_10032 ANIA_10047 ANIA_10626 ANIA_11303 ANIA_11444 ANIA_11499 ANIA_11543 ANIA_11565
5.47151e-05	29	42	2.2229	Protein localization to mitochondrion	http://amigo.geneontology.org/amigo/term/GO:0070585	ANIA_00559 ANIA_00747 ANIA_00821 ANIA_01104 ANIA_01105 ANIA_01281 ANIA_01892 ANIA_02432 ANIA_02939 ANIA_03803 ANIA_04490 ANIA_04559 ANIA_04633 ANIA_05693 ANIA_06089 ANIA_06248 ANIA_06306 ANIA_06348 ANIA_06397 ANIA_06841 ANIA_07549 ANIA_07649 ANIA_08059 ANIA_08229 ANIA_09118 ANIA_10159 ANIA_10828 ANIA_10847 ANIA_11136
5.47151e-05	29	42	2.2229	Establishment of protein localization to mitochondrion	http://amigo.geneontology.org/amigo/term/GO:0072655	ANIA_00559 ANIA_00747 ANIA_00821 ANIA_01104 ANIA_01105 ANIA_01281 ANIA_01892 ANIA_02432 ANIA_02939 ANIA_03803 ANIA_04490 ANIA_04559 ANIA_04633 ANIA_05693 ANIA_06089 ANIA_06248 ANIA_06306 ANIA_06348 ANIA_06397 ANIA_06841 ANIA_07549 ANIA_07649 ANIA_08059 ANIA_08229 ANIA_09118 ANIA_10159 ANIA_10828 ANIA_10847 ANIA_11136
0.000113809	157	369	1.37723	Ion transmembrane transport	http://amigo.geneontology.org/amigo/term/GO:0034220	ANIA_00209 ANIA_00218 ANIA_00252 ANIA_00357 ANIA_00366 ANIA_00501 ANIA_00528 ANIA_00601 ANIA_00713 ANIA_00747 ANIA_00870 ANIA_00943 ANIA_01022 ANIA_01181 ANIA_01189 ANIA_01269 ANIA_01290 ANIA_01472 ANIA_01523 ANIA_01534 ANIA_01577 ANIA_01624 ANIA_01628 ANIA_01795 ANIA_01833 ANIA_02218 ANIA_02308 ANIA_02315 ANIA_02316 ANIA_02358 ANIA_02368 ANIA_02466 ANIA_02475 ANIA_02477 ANIA_02544 ANIA_02585 ANI…
0.000117102	24	33	2.34137	Respiratory chain complex	http://amigo.geneontology.org/amigo/term/GO:0098803	ANIA_00357 ANIA_00747 ANIA_00896 ANIA_01063 ANIA_02306 ANIA_02316 ANIA_02916 ANIA_03922 ANIA_04288 ANIA_04388 ANIA_05597 ANIA_05969 ANIA_06255 ANIA_07561 ANIA_07629 ANIA_08049 ANIA_08118 ANIA_08763 ANIA_08793 ANIA_09078 ANIA_10229 ANIA_10525 ANIA_10553 ANIA_10585
0.000117521	25	35	2.29956	Mitochondrial respirasome	http://amigo.geneontology.org/amigo/term/GO:0005746	ANIA_00357 ANIA_00747 ANIA_00896 ANIA_01063 ANIA_01066 ANIA_02306 ANIA_02316 ANIA_02916 ANIA_03922 ANIA_04288 ANIA_04388 ANIA_05597 ANIA_05969 ANIA_06255 ANIA_07561 ANIA_07629 ANIA_08049 ANIA_08118 ANIA_08763 ANIA_08793 ANIA_09078 ANIA_10229 ANIA_10525 ANIA_10553 ANIA_10585
0.000168088	111	246	1.45858	Inorganic cation transmembrane transport	http://amigo.geneontology.org/amigo/term/GO:0098662	ANIA_00209 ANIA_00252 ANIA_00357 ANIA_00501 ANIA_00601 ANIA_00713 ANIA_00747 ANIA_00943 ANIA_01022 ANIA_01181 ANIA_01189 ANIA_01290 ANIA_01523 ANIA_01534 ANIA_01577 ANIA_01624 ANIA_01628 ANIA_01795 ANIA_01833 ANIA_02218 ANIA_02308 ANIA_02315 ANIA_02316 ANIA_02368 ANIA_02466 ANIA_02475 ANIA_02544 ANIA_02585 ANIA_02665 ANIA_02892 ANIA_02939 ANIA_02958 ANIA_02974 ANIA_03088 ANIA_03209 ANIA_03220 ANI…
0.000193979	44	77	1.83964	Cellular respiration	http://amigo.geneontology.org/amigo/term/GO:0045333	ANIA_00357 ANIA_00394 ANIA_00670 ANIA_00747 ANIA_00896 ANIA_01063 ANIA_02306 ANIA_02315 ANIA_02316 ANIA_02332 ANIA_02414 ANIA_02916 ANIA_03068 ANIA_03466 ANIA_03922 ANIA_04164 ANIA_04288 ANIA_04388 ANIA_04740 ANIA_04755 ANIA_04977 ANIA_05571 ANIA_05597 ANIA_05629 ANIA_05634 ANIA_05703 ANIA_05969 ANIA_06246 ANIA_06287 ANIA_06717 ANIA_07000 ANIA_07500 ANIA_08049 ANIA_08118 ANIA_08275 ANIA_08707 ANI…
0.000199941	29	44	2.12186	Channel activity	http://amigo.geneontology.org/amigo/term/GO:0015267	ANIA_00252 ANIA_00830 ANIA_01523 ANIA_01624 ANIA_02308 ANIA_02315 ANIA_02477 ANIA_02730 ANIA_02822 ANIA_02880 ANIA_03157 ANIA_03361 ANIA_03915 ANIA_04402 ANIA_05167 ANIA_06071 ANIA_06287 ANIA_07165 ANIA_07571 ANIA_07618 ANIA_08842 ANIA_10032 ANIA_10047 ANIA_10056 ANIA_10250 ANIA_10626 ANIA_10902 ANIA_11499 ANIA_11565
0.000199941	29	44	2.12186	Passive transmembrane transporter activity	http://amigo.geneontology.org/amigo/term/GO:0022803	ANIA_00252 ANIA_00830 ANIA_01523 ANIA_01624 ANIA_02308 ANIA_02315 ANIA_02477 ANIA_02730 ANIA_02822 ANIA_02880 ANIA_03157 ANIA_03361 ANIA_03915 ANIA_04402 ANIA_05167 ANIA_06071 ANIA_06287 ANIA_07165 ANIA_07571 ANIA_07618 ANIA_08842 ANIA_10032 ANIA_10047 ANIA_10056 ANIA_10250 ANIA_10626 ANIA_10902 ANIA_11499 ANIA_11565
0.000199941	178	432	1.33578	Ion transport	http://amigo.geneontology.org/amigo/term/GO:0006811	ANIA_00176 ANIA_00209 ANIA_00218 ANIA_00225 ANIA_00252 ANIA_00357 ANIA_00366 ANIA_00497 ANIA_00501 ANIA_00528 ANIA_00601 ANIA_00713 ANIA_00747 ANIA_00870 ANIA_00943 ANIA_01022 ANIA_01181 ANIA_01189 ANIA_01269 ANIA_01290 ANIA_01472 ANIA_01523 ANIA_01534 ANIA_01577 ANIA_01624 ANIA_01628 ANIA_01795 ANIA_01833 ANIA_01986 ANIA_02173 ANIA_02218 ANIA_02308 ANIA_02315 ANIA_02316 ANIA_02358 ANIA_02368 ANI…
0.000220702	63	125	1.64895	Primary active transmembrane transporter activity	http://amigo.geneontology.org/amigo/term/GO:0015399	ANIA_00015 ANIA_00225 ANIA_00252 ANIA_00357 ANIA_00404 ANIA_00559 ANIA_00630 ANIA_00747 ANIA_00771 ANIA_01014 ANIA_01063 ANIA_01094 ANIA_01174 ANIA_01189 ANIA_01523 ANIA_01534 ANIA_01624 ANIA_01628 ANIA_02052 ANIA_02300 ANIA_02306 ANIA_02315 ANIA_02316 ANIA_02414 ANIA_03011 ANIA_03088 ANIA_03952 ANIA_04091 ANIA_04288 ANIA_04388 ANIA_04589 ANIA_04859 ANIA_04920 ANIA_05083 ANIA_05597 ANIA_05606 ANI…
0.000220702	22	32	2.36088	Nucleoside triphosphate biosynthetic process	http://amigo.geneontology.org/amigo/term/GO:0009142	ANIA_00252 ANIA_00357 ANIA_00943 ANIA_01523 ANIA_01534 ANIA_01624 ANIA_02315 ANIA_04859 ANIA_04927 ANIA_05083 ANIA_05606 ANIA_05999 ANIA_06287 ANIA_06631 ANIA_10032 ANIA_10047 ANIA_10626 ANIA_11303 ANIA_11444 ANIA_11499 ANIA_11543 ANIA_11565
0.00022495	25	36	2.23568	Protein targeting to mitochondrion	http://amigo.geneontology.org/amigo/term/GO:0006626	ANIA_00559 ANIA_00747 ANIA_00821 ANIA_01104 ANIA_01105 ANIA_01281 ANIA_01892 ANIA_02432 ANIA_03803 ANIA_04490 ANIA_04559 ANIA_04633 ANIA_05693 ANIA_06089 ANIA_06248 ANIA_06306 ANIA_06348 ANIA_06841 ANIA_07649 ANIA_08059 ANIA_09118 ANIA_10159 ANIA_10828 ANIA_10847 ANIA_11136
0.000232553	38	64	1.91151	Aerobic respiration	http://amigo.geneontology.org/amigo/term/GO:0009060	ANIA_00357 ANIA_00670 ANIA_00747 ANIA_00896 ANIA_01063 ANIA_02306 ANIA_02315 ANIA_02316 ANIA_02332 ANIA_02414 ANIA_02916 ANIA_03068 ANIA_03466 ANIA_03922 ANIA_04164 ANIA_04288 ANIA_04388 ANIA_04740 ANIA_04755 ANIA_05571 ANIA_05597 ANIA_05629 ANIA_05634 ANIA_05703 ANIA_05969 ANIA_06246 ANIA_06287 ANIA_06717 ANIA_07000 ANIA_07500 ANIA_08049 ANIA_08118 ANIA_08275 ANIA_08707 ANIA_08793 ANIA_10178 ANI…
0.000241998	318	846	1.23048	Transmembrane transport	http://amigo.geneontology.org/amigo/term/GO:0055085	ANIA_00015 ANIA_00029 ANIA_00122 ANIA_00208 ANIA_00209 ANIA_00218 ANIA_00225 ANIA_00252 ANIA_00346 ANIA_00357 ANIA_00366 ANIA_00404 ANIA_00417 ANIA_00497 ANIA_00501 ANIA_00528 ANIA_00559 ANIA_00581 ANIA_00601 ANIA_00643 ANIA_00700 ANIA_00713 ANIA_00732 ANIA_00747 ANIA_00771 ANIA_00811 ANIA_00830 ANIA_00834 ANIA_00870 ANIA_00890 ANIA_00930 ANIA_00943 ANIA_01014 ANIA_01022 ANIA_01101 ANIA_01105 ANI…
0.000347774	29	45	2.07471	Protein transmembrane transport	http://amigo.geneontology.org/amigo/term/GO:0071806	ANIA_00122 ANIA_00417 ANIA_00559 ANIA_00643 ANIA_00834 ANIA_01105 ANIA_01281 ANIA_01511 ANIA_01892 ANIA_02014 ANIA_02062 ANIA_02432 ANIA_04490 ANIA_04559 ANIA_04589 ANIA_04633 ANIA_05681 ANIA_05693 ANIA_06089 ANIA_06248 ANIA_06258 ANIA_06269 ANIA_06348 ANIA_07687 ANIA_08059 ANIA_09118 ANIA_10159 ANIA_10828 ANIA_10925
0.000399671	27	41	2.12008	Mitochondrial transmembrane transport	http://amigo.geneontology.org/amigo/term/GO:1990542	ANIA_00346 ANIA_00357 ANIA_00559 ANIA_01105 ANIA_01281 ANIA_01892 ANIA_02315 ANIA_02432 ANIA_03663 ANIA_04064 ANIA_04387 ANIA_04490 ANIA_04559 ANIA_04633 ANIA_05298 ANIA_05693 ANIA_06089 ANIA_06248 ANIA_06279 ANIA_06287 ANIA_06348 ANIA_06690 ANIA_08785 ANIA_09118 ANIA_10250 ANIA_10828 ANIA_11107
0.000441397	22	31	2.28472	Proton-transporting two-sector ATPase complex	http://amigo.geneontology.org/amigo/term/GO:0016469	ANIA_00252 ANIA_00943 ANIA_01523 ANIA_01534 ANIA_01624 ANIA_02315 ANIA_03088 ANIA_04927 ANIA_05083 ANIA_05606 ANIA_06127 ANIA_06287 ANIA_06631 ANIA_09107 ANIA_10032 ANIA_10047 ANIA_10626 ANIA_11303 ANIA_11444 ANIA_11499 ANIA_11543 ANIA_11565
0.000441397	319	855	1.22114	Transporter activity	http://amigo.geneontology.org/amigo/term/GO:0005215	ANIA_00015 ANIA_00029 ANIA_00066 ANIA_00208 ANIA_00209 ANIA_00218 ANIA_00225 ANIA_00252 ANIA_00346 ANIA_00357 ANIA_00366 ANIA_00404 ANIA_00497 ANIA_00501 ANIA_00528 ANIA_00559 ANIA_00581 ANIA_00601 ANIA_00630 ANIA_00700 ANIA_00713 ANIA_00732 ANIA_00747 ANIA_00771 ANIA_00811 ANIA_00830 ANIA_00834 ANIA_00870 ANIA_00890 ANIA_00943 ANIA_01014 ANIA_01063 ANIA_01094 ANIA_01101 ANIA_01145 ANIA_01174 ANI…
0.000441397	24	35	2.20757	Ion channel activity	http://amigo.geneontology.org/amigo/term/GO:0005216	ANIA_00252 ANIA_01523 ANIA_01624 ANIA_02308 ANIA_02315 ANIA_02477 ANIA_02730 ANIA_02880 ANIA_03157 ANIA_03361 ANIA_04402 ANIA_05167 ANIA_06071 ANIA_06287 ANIA_07165 ANIA_07571 ANIA_08842 ANIA_10032 ANIA_10047 ANIA_10056 ANIA_10250 ANIA_10626 ANIA_11499 ANIA_11565
0.000441397	25	39	2.17526	Oxidative phosphorylation	http://www.genome.jp/kegg-bin/show_pathway?ani00190	ANIA_00357 ANIA_00395 ANIA_00943 ANIA_01063 ANIA_01534 ANIA_01624 ANIA_01915 ANIA_02316 ANIA_02332 ANIA_03922 ANIA_04288 ANIA_04859 ANIA_04927 ANIA_05597 ANIA_05606 ANIA_05629 ANIA_05704 ANIA_06287 ANIA_06557 ANIA_06631 ANIA_07629 ANIA_08049 ANIA_08118 ANIA_08763 ANIA_08793
0.000441397	24	38	2.20757	Nucleoside triphosphate metabolic process	http://amigo.geneontology.org/amigo/term/GO:0009141	ANIA_00252 ANIA_00357 ANIA_00943 ANIA_01202 ANIA_01523 ANIA_01534 ANIA_01624 ANIA_02315 ANIA_03331 ANIA_04859 ANIA_04927 ANIA_05083 ANIA_05606 ANIA_05999 ANIA_06287 ANIA_06631 ANIA_10032 ANIA_10047 ANIA_10626 ANIA_11303 ANIA_11444 ANIA_11499 ANIA_11543 ANIA_11565
0.000527412	15	18	2.68281	Organellar small ribosomal subunit	http://amigo.geneontology.org/amigo/term/GO:0000314	ANIA_00470 ANIA_01954 ANIA_03173 ANIA_03744 ANIA_04251 ANIA_04611 ANIA_04613 ANIA_05164 ANIA_05203 ANIA_06039 ANIA_06564 ANIA_07449 ANIA_07699 ANIA_07701 ANIA_10161
0.000527412	15	18	2.68281	Mitochondrial small ribosomal subunit	http://amigo.geneontology.org/amigo/term/GO:0005763	ANIA_00470 ANIA_01954 ANIA_03173 ANIA_03744 ANIA_04251 ANIA_04611 ANIA_04613 ANIA_05164 ANIA_05203 ANIA_06039 ANIA_06564 ANIA_07449 ANIA_07699 ANIA_07701 ANIA_10161
0.000551774	82	177	1.50851	Integral component of organelle membrane	http://amigo.geneontology.org/amigo/term/GO:0031301	ANIA_00104 ANIA_00162 ANIA_00315 ANIA_00432 ANIA_00528 ANIA_00559 ANIA_00762 ANIA_00834 ANIA_00870 ANIA_00981 ANIA_01014 ANIA_01022 ANIA_01066 ANIA_01105 ANIA_01347 ANIA_01620 ANIA_01771 ANIA_01892 ANIA_01969 ANIA_02055 ANIA_02358 ANIA_02404 ANIA_02684 ANIA_02738 ANIA_03190 ANIA_03439 ANIA_03576 ANIA_03583 ANIA_03658 ANIA_03722 ANIA_03910 ANIA_03997 ANIA_04068 ANIA_04280 ANIA_04478 ANIA_04557 ANI…
0.0005731	28	44	2.04869	Mitochondrial respiratory chain complex assembly	http://amigo.geneontology.org/amigo/term/GO:0033108	ANIA_01066 ANIA_03068 ANIA_03922 ANIA_04164 ANIA_04388 ANIA_04740 ANIA_04842 ANIA_04863 ANIA_04918 ANIA_05008 ANIA_05703 ANIA_05938 ANIA_06255 ANIA_06397 ANIA_06841 ANIA_07144 ANIA_07549 ANIA_07629 ANIA_08229 ANIA_08766 ANIA_10178 ANIA_10525 ANIA_10569 ANIA_10609 ANIA_10622 ANIA_10711 ANIA_10717 ANIA_11175
0.0005731	10	10	3.21938	Mitochondrial proton-transporting ATP synthase complex, coupling factor F(o)	http://amigo.geneontology.org/amigo/term/GO:0000276	ANIA_00943 ANIA_01534 ANIA_01624 ANIA_04927 ANIA_06287 ANIA_06631 ANIA_11303 ANIA_11444 ANIA_11543 ANIA_11565
0.0005731	10	10	3.21938	Proton-transporting ATP synthase complex, coupling factor F(o)	http://amigo.geneontology.org/amigo/term/GO:0045263	ANIA_00943 ANIA_01534 ANIA_01624 ANIA_04927 ANIA_06287 ANIA_06631 ANIA_11303 ANIA_11444 ANIA_11543 ANIA_11565
0.0005731	10	10	3.21938	Proton channel activity	http://amigo.geneontology.org/amigo/term/GO:0015252	ANIA_00252 ANIA_01523 ANIA_01624 ANIA_02315 ANIA_06287 ANIA_10032 ANIA_10047 ANIA_10626 ANIA_11499 ANIA_11565
0.0005731	10	10	3.21938	Proton-transporting ATP synthase activity, rotational mechanism	http://amigo.geneontology.org/amigo/term/GO:0046933	ANIA_00252 ANIA_01523 ANIA_01624 ANIA_02315 ANIA_06287 ANIA_10032 ANIA_10047 ANIA_10626 ANIA_11499 ANIA_11565
0.000650204	502	1417	1.16101	Transport	http://amigo.geneontology.org/amigo/term/GO:0006810	ANIA_00015 ANIA_00029 ANIA_00056 ANIA_00066 ANIA_00090 ANIA_00122 ANIA_00176 ANIA_00208 ANIA_00209 ANIA_00218 ANIA_00225 ANIA_00252 ANIA_00281 ANIA_00295 ANIA_00316 ANIA_00346 ANIA_00357 ANIA_00366 ANIA_00404 ANIA_00406 ANIA_00417 ANIA_00497 ANIA_00501 ANIA_00528 ANIA_00559 ANIA_00571 ANIA_00573 ANIA_00581 ANIA_00601 ANIA_00627 ANIA_00634 ANIA_00643 ANIA_00700 ANIA_00713 ANIA_00732 ANIA_00747 ANI…
0.000650204	133	314	1.36798	Cation transport	http://amigo.geneontology.org/amigo/term/GO:0006812	ANIA_00176 ANIA_00209 ANIA_00252 ANIA_00357 ANIA_00501 ANIA_00601 ANIA_00713 ANIA_00747 ANIA_00943 ANIA_01022 ANIA_01181 ANIA_01189 ANIA_01269 ANIA_01290 ANIA_01523 ANIA_01534 ANIA_01577 ANIA_01624 ANIA_01628 ANIA_01795 ANIA_01833 ANIA_02218 ANIA_02308 ANIA_02315 ANIA_02316 ANIA_02368 ANIA_02466 ANIA_02475 ANIA_02544 ANIA_02585 ANIA_02665 ANIA_02880 ANIA_02892 ANIA_02939 ANIA_02958 ANIA_02974 ANI…
0.000651585	155	376	1.33423	Ion transmembrane transporter activity	http://amigo.geneontology.org/amigo/term/GO:0015075	ANIA_00066 ANIA_00209 ANIA_00218 ANIA_00252 ANIA_00357 ANIA_00366 ANIA_00497 ANIA_00501 ANIA_00601 ANIA_00713 ANIA_00747 ANIA_00870 ANIA_00943 ANIA_01181 ANIA_01189 ANIA_01269 ANIA_01290 ANIA_01472 ANIA_01523 ANIA_01534 ANIA_01577 ANIA_01624 ANIA_01628 ANIA_01631 ANIA_01795 ANIA_01833 ANIA_02173 ANIA_02218 ANIA_02306 ANIA_02308 ANIA_02315 ANIA_02316 ANIA_02368 ANIA_02465 ANIA_02466 ANIA_02475 ANI…
0.000655047	112	258	1.40848	Membrane protein complex	http://amigo.geneontology.org/amigo/term/GO:0098796	ANIA_00162 ANIA_00252 ANIA_00357 ANIA_00417 ANIA_00559 ANIA_00571 ANIA_00651 ANIA_00747 ANIA_00821 ANIA_00834 ANIA_00896 ANIA_00943 ANIA_01016 ANIA_01063 ANIA_01105 ANIA_01229 ANIA_01341 ANIA_01347 ANIA_01365 ANIA_01488 ANIA_01523 ANIA_01534 ANIA_01620 ANIA_01624 ANIA_01892 ANIA_01933 ANIA_01969 ANIA_02048 ANIA_02055 ANIA_02306 ANIA_02315 ANIA_02316 ANIA_02419 ANIA_02916 ANIA_03026 ANIA_03088 ANI…
0.000655047	130	307	1.37219	Inorganic molecular entity transmembrane transporter activity	http://amigo.geneontology.org/amigo/term/GO:0015318	ANIA_00066 ANIA_00209 ANIA_00218 ANIA_00252 ANIA_00357 ANIA_00501 ANIA_00601 ANIA_00713 ANIA_00747 ANIA_00870 ANIA_00943 ANIA_01181 ANIA_01189 ANIA_01290 ANIA_01523 ANIA_01534 ANIA_01577 ANIA_01624 ANIA_01628 ANIA_01795 ANIA_01833 ANIA_02218 ANIA_02306 ANIA_02308 ANIA_02315 ANIA_02316 ANIA_02368 ANIA_02465 ANIA_02466 ANIA_02475 ANIA_02477 ANIA_02544 ANIA_02585 ANIA_02665 ANIA_02730 ANIA_02880 ANI…
0.000673281	17	22	2.4877	Cation channel activity	http://amigo.geneontology.org/amigo/term/GO:0005261	ANIA_00252 ANIA_01523 ANIA_01624 ANIA_02315 ANIA_02880 ANIA_05167 ANIA_06071 ANIA_06287 ANIA_07571 ANIA_08842 ANIA_10032 ANIA_10047 ANIA_10056 ANIA_10250 ANIA_10626 ANIA_11499 ANIA_11565
0.000876176	121	283	1.38136	Cation transmembrane transport	http://amigo.geneontology.org/amigo/term/GO:0098655	ANIA_00209 ANIA_00252 ANIA_00357 ANIA_00501 ANIA_00601 ANIA_00713 ANIA_00747 ANIA_00943 ANIA_01022 ANIA_01181 ANIA_01189 ANIA_01269 ANIA_01290 ANIA_01523 ANIA_01534 ANIA_01577 ANIA_01624 ANIA_01628 ANIA_01795 ANIA_01833 ANIA_02218 ANIA_02308 ANIA_02315 ANIA_02316 ANIA_02368 ANIA_02466 ANIA_02475 ANIA_02544 ANIA_02585 ANIA_02665 ANIA_02880 ANIA_02892 ANIA_02939 ANIA_02958 ANIA_02974 ANIA_03088 ANI…
0.000914573	76	163	1.51033	Proton transmembrane transport	http://amigo.geneontology.org/amigo/term/GO:1902600	ANIA_00252 ANIA_00357 ANIA_00501 ANIA_00713 ANIA_00747 ANIA_00943 ANIA_01022 ANIA_01189 ANIA_01290 ANIA_01523 ANIA_01534 ANIA_01577 ANIA_01624 ANIA_01628 ANIA_02308 ANIA_02315 ANIA_02316 ANIA_02466 ANIA_02475 ANIA_02544 ANIA_02585 ANIA_02665 ANIA_02892 ANIA_02939 ANIA_02958 ANIA_02974 ANIA_03088 ANIA_03220 ANIA_03357 ANIA_03922 ANIA_04148 ANIA_04150 ANIA_04277 ANIA_04388 ANIA_04621 ANIA_04836 ANI…
0.00109833	126	298	1.3658	Cation transmembrane transporter activity	http://amigo.geneontology.org/amigo/term/GO:0008324	ANIA_00209 ANIA_00252 ANIA_00357 ANIA_00501 ANIA_00601 ANIA_00713 ANIA_00747 ANIA_00943 ANIA_01181 ANIA_01189 ANIA_01269 ANIA_01290 ANIA_01523 ANIA_01534 ANIA_01577 ANIA_01624 ANIA_01628 ANIA_01631 ANIA_01795 ANIA_01833 ANIA_02218 ANIA_02306 ANIA_02308 ANIA_02315 ANIA_02316 ANIA_02368 ANIA_02465 ANIA_02466 ANIA_02475 ANIA_02544 ANIA_02585 ANIA_02665 ANIA_02880 ANIA_02892 ANIA_02958 ANIA_02974 ANI…
0.00111855	14	17	2.65125	Cellular response to heat	http://amigo.geneontology.org/amigo/term/GO:0034605	ANIA_00858 ANIA_01163 ANIA_02530 ANIA_02911 ANIA_03441 ANIA_05324 ANIA_05523 ANIA_05602 ANIA_05635 ANIA_05755 ANIA_07697 ANIA_08269 ANIA_08637 ANIA_08639
0.00115789	84	186	1.46972	Intrinsic component of organelle membrane	http://amigo.geneontology.org/amigo/term/GO:0031300	ANIA_00104 ANIA_00162 ANIA_00315 ANIA_00432 ANIA_00528 ANIA_00559 ANIA_00762 ANIA_00834 ANIA_00870 ANIA_00981 ANIA_01014 ANIA_01022 ANIA_01066 ANIA_01093 ANIA_01105 ANIA_01347 ANIA_01620 ANIA_01771 ANIA_01892 ANIA_01969 ANIA_02055 ANIA_02358 ANIA_02404 ANIA_02684 ANIA_02738 ANIA_03190 ANIA_03439 ANIA_03576 ANIA_03583 ANIA_03658 ANIA_03722 ANIA_03910 ANIA_03997 ANIA_04068 ANIA_04280 ANIA_04478 ANI…
0.00124165	506	1438	1.15287	Establishment of localization	http://amigo.geneontology.org/amigo/term/GO:0051234	ANIA_00015 ANIA_00029 ANIA_00056 ANIA_00066 ANIA_00090 ANIA_00122 ANIA_00162 ANIA_00176 ANIA_00208 ANIA_00209 ANIA_00218 ANIA_00225 ANIA_00252 ANIA_00281 ANIA_00295 ANIA_00316 ANIA_00346 ANIA_00357 ANIA_00366 ANIA_00404 ANIA_00406 ANIA_00417 ANIA_00497 ANIA_00501 ANIA_00528 ANIA_00559 ANIA_00571 ANIA_00573 ANIA_00581 ANIA_00601 ANIA_00627 ANIA_00634 ANIA_00643 ANIA_00700 ANIA_00713 ANIA_00732 ANI…
0.00137726	116	272	1.37804	Inorganic cation transmembrane transporter activity	http://amigo.geneontology.org/amigo/term/GO:0022890	ANIA_00209 ANIA_00252 ANIA_00357 ANIA_00501 ANIA_00601 ANIA_00713 ANIA_00747 ANIA_00943 ANIA_01181 ANIA_01189 ANIA_01290 ANIA_01523 ANIA_01534 ANIA_01577 ANIA_01624 ANIA_01628 ANIA_01795 ANIA_01833 ANIA_02218 ANIA_02306 ANIA_02308 ANIA_02315 ANIA_02316 ANIA_02368 ANIA_02465 ANIA_02466 ANIA_02475 ANIA_02544 ANIA_02585 ANIA_02665 ANIA_02880 ANIA_02892 ANIA_02958 ANIA_02974 ANIA_03088 ANIA_03209 ANI…
0.00143322	304	824	1.20826	Transmembrane transporter activity	http://amigo.geneontology.org/amigo/term/GO:0022857	ANIA_00015 ANIA_00029 ANIA_00066 ANIA_00208 ANIA_00209 ANIA_00218 ANIA_00225 ANIA_00252 ANIA_00346 ANIA_00357 ANIA_00366 ANIA_00404 ANIA_00497 ANIA_00501 ANIA_00528 ANIA_00559 ANIA_00581 ANIA_00601 ANIA_00630 ANIA_00700 ANIA_00713 ANIA_00732 ANIA_00747 ANIA_00771 ANIA_00811 ANIA_00830 ANIA_00834 ANIA_00870 ANIA_00890 ANIA_00943 ANIA_01014 ANIA_01063 ANIA_01094 ANIA_01101 ANIA_01145 ANIA_01174 ANI…
0.00163191	20	29	2.22026	Mitochondrial intermembrane space	http://amigo.geneontology.org/amigo/term/GO:0005758	ANIA_00432 ANIA_00670 ANIA_01093 ANIA_03853 ANIA_04755 ANIA_04863 ANIA_05008 ANIA_05130 ANIA_05646 ANIA_06246 ANIA_06255 ANIA_06306 ANIA_07649 ANIA_10178 ANIA_10220 ANIA_10622 ANIA_10879 ANIA_10983 ANIA_11136 ANIA_11377
0.00163191	20	29	2.22026	Organelle envelope lumen	http://amigo.geneontology.org/amigo/term/GO:0031970	ANIA_00432 ANIA_00670 ANIA_01093 ANIA_03853 ANIA_04755 ANIA_04863 ANIA_05008 ANIA_05130 ANIA_05646 ANIA_06246 ANIA_06255 ANIA_06306 ANIA_07649 ANIA_10178 ANIA_10220 ANIA_10622 ANIA_10879 ANIA_10983 ANIA_11136 ANIA_11377
0.0016464	19	27	2.26549	Cytochrome complex assembly	http://amigo.geneontology.org/amigo/term/GO:0017004	ANIA_01066 ANIA_03068 ANIA_03922 ANIA_04388 ANIA_04415 ANIA_04842 ANIA_04863 ANIA_05008 ANIA_06255 ANIA_06397 ANIA_07144 ANIA_07549 ANIA_08229 ANIA_08766 ANIA_10178 ANIA_10609 ANIA_10711 ANIA_10879 ANIA_11175
0.00190822	26	42	1.99295	Intracellular protein transmembrane transport	http://amigo.geneontology.org/amigo/term/GO:0065002	ANIA_00122 ANIA_00417 ANIA_00559 ANIA_00643 ANIA_00834 ANIA_01105 ANIA_01281 ANIA_01511 ANIA_01892 ANIA_02014 ANIA_02062 ANIA_02432 ANIA_04490 ANIA_04559 ANIA_04589 ANIA_04633 ANIA_05681 ANIA_05693 ANIA_06089 ANIA_06248 ANIA_06258 ANIA_06269 ANIA_06348 ANIA_09118 ANIA_10828 ANIA_10925
0.00200907	86	192	1.44201	Generation of precursor metabolites and energy	http://amigo.geneontology.org/amigo/term/GO:0006091	ANIA_00252 ANIA_00285 ANIA_00357 ANIA_00394 ANIA_00395 ANIA_00670 ANIA_00747 ANIA_00896 ANIA_01063 ANIA_01094 ANIA_01189 ANIA_01202 ANIA_01257 ANIA_01523 ANIA_01534 ANIA_01624 ANIA_01628 ANIA_01918 ANIA_02013 ANIA_02306 ANIA_02314 ANIA_02315 ANIA_02316 ANIA_02332 ANIA_02378 ANIA_02414 ANIA_02638 ANIA_02916 ANIA_03059 ANIA_03068 ANIA_03223 ANIA_03466 ANIA_03862 ANIA_03922 ANIA_04064 ANIA_04164 ANI…
0.00208674	25	40	2.01211	Transporter complex	http://amigo.geneontology.org/amigo/term/GO:1990351	ANIA_00357 ANIA_00747 ANIA_01063 ANIA_01511 ANIA_02306 ANIA_03922 ANIA_04288 ANIA_04388 ANIA_05167 ANIA_05597 ANIA_05969 ANIA_06258 ANIA_06306 ANIA_06635 ANIA_07561 ANIA_07629 ANIA_07649 ANIA_08049 ANIA_08763 ANIA_09078 ANIA_10229 ANIA_10250 ANIA_10525 ANIA_10925 ANIA_11136
0.00254177	23	36	2.05682	Oxidoreduction-driven active transmembrane transporter activity	http://amigo.geneontology.org/amigo/term/GO:0015453	ANIA_00357 ANIA_00630 ANIA_00747 ANIA_01063 ANIA_01094 ANIA_02306 ANIA_02316 ANIA_02414 ANIA_03011 ANIA_04288 ANIA_04388 ANIA_05597 ANIA_05629 ANIA_05969 ANIA_06255 ANIA_08118 ANIA_08273 ANIA_08763 ANIA_09078 ANIA_10229 ANIA_10553 ANIA_10585 ANIA_11377
0.00285485	48	95	1.62663	Energy derivation by oxidation of organic compounds	http://amigo.geneontology.org/amigo/term/GO:0015980	ANIA_00357 ANIA_00394 ANIA_00670 ANIA_00747 ANIA_00896 ANIA_01063 ANIA_01257 ANIA_02306 ANIA_02314 ANIA_02315 ANIA_02316 ANIA_02332 ANIA_02414 ANIA_02916 ANIA_03068 ANIA_03466 ANIA_03922 ANIA_04164 ANIA_04288 ANIA_04388 ANIA_04740 ANIA_04755 ANIA_04913 ANIA_04977 ANIA_05571 ANIA_05597 ANIA_05629 ANIA_05634 ANIA_05703 ANIA_05969 ANIA_06246 ANIA_06287 ANIA_06717 ANIA_07000 ANIA_07500 ANIA_08049 ANI…
0.00305072	14	18	2.50396	Proton-transporting two-sector ATPase complex, proton-transporting domain	http://amigo.geneontology.org/amigo/term/GO:0033177	ANIA_00943 ANIA_01534 ANIA_01624 ANIA_03088 ANIA_04927 ANIA_05083 ANIA_05606 ANIA_06127 ANIA_06287 ANIA_06631 ANIA_11303 ANIA_11444 ANIA_11543 ANIA_11565
0.00325604	10	11	2.92671	Trehalose metabolic process	http://amigo.geneontology.org/amigo/term/GO:0005991	ANIA_00363 ANIA_01016 ANIA_01959 ANIA_03441 ANIA_03913 ANIA_05523 ANIA_05635 ANIA_08639 ANIA_09340 ANIA_10533
0.00325604	51	103	1.59406	Protein targeting	http://amigo.geneontology.org/amigo/term/GO:0006605	ANIA_00122 ANIA_00417 ANIA_00559 ANIA_00643 ANIA_00747 ANIA_00821 ANIA_00834 ANIA_01104 ANIA_01105 ANIA_01281 ANIA_01511 ANIA_01892 ANIA_01940 ANIA_02014 ANIA_02062 ANIA_02071 ANIA_02140 ANIA_02432 ANIA_03003 ANIA_03803 ANIA_03842 ANIA_04076 ANIA_04490 ANIA_04559 ANIA_04589 ANIA_04633 ANIA_04697 ANIA_04876 ANIA_04899 ANIA_04915 ANIA_05579 ANIA_05681 ANIA_05693 ANIA_06089 ANIA_06248 ANIA_06258 ANI…
0.00339476	16	22	2.34137	Response to temperature stimulus	http://amigo.geneontology.org/amigo/term/GO:0009266	ANIA_00858 ANIA_01163 ANIA_02530 ANIA_02731 ANIA_02911 ANIA_03441 ANIA_05324 ANIA_05523 ANIA_05602 ANIA_05635 ANIA_05755 ANIA_07697 ANIA_08269 ANIA_08637 ANIA_08639 ANIA_10778
0.00339476	16	22	2.34137	Response to heat	http://amigo.geneontology.org/amigo/term/GO:0009408	ANIA_00858 ANIA_01163 ANIA_02530 ANIA_02731 ANIA_02911 ANIA_03441 ANIA_05324 ANIA_05523 ANIA_05602 ANIA_05635 ANIA_05755 ANIA_07697 ANIA_08269 ANIA_08637 ANIA_08639 ANIA_10778
0.00414781	8	8	3.21938	Proton-transporting ATP synthase complex, catalytic core F(1)	http://amigo.geneontology.org/amigo/term/GO:0045261	ANIA_00252 ANIA_01523 ANIA_02315 ANIA_06287 ANIA_10032 ANIA_10047 ANIA_10626 ANIA_11499
0.00489244	11	13	2.72409	Protein transporter activity	http://amigo.geneontology.org/amigo/term/GO:0140318	ANIA_00559 ANIA_00834 ANIA_01892 ANIA_03642 ANIA_04589 ANIA_06306 ANIA_06348 ANIA_07687 ANIA_08059 ANIA_10159 ANIA_10828
0.00512033	529	1528	1.1331	Localization	http://amigo.geneontology.org/amigo/term/GO:0051179	ANIA_00015 ANIA_00029 ANIA_00056 ANIA_00066 ANIA_00090 ANIA_00122 ANIA_00162 ANIA_00176 ANIA_00208 ANIA_00209 ANIA_00218 ANIA_00225 ANIA_00252 ANIA_00281 ANIA_00294 ANIA_00295 ANIA_00316 ANIA_00346 ANIA_00357 ANIA_00366 ANIA_00404 ANIA_00406 ANIA_00417 ANIA_00448 ANIA_00497 ANIA_00501 ANIA_00528 ANIA_00559 ANIA_00571 ANIA_00573 ANIA_00581 ANIA_00601 ANIA_00627 ANIA_00634 ANIA_00643 ANIA_00700 ANI…
0.00526187	132	329	1.3116	Active transmembrane transporter activity	http://amigo.geneontology.org/amigo/term/GO:0022804	ANIA_00015 ANIA_00218 ANIA_00225 ANIA_00252 ANIA_00357 ANIA_00404 ANIA_00501 ANIA_00559 ANIA_00581 ANIA_00630 ANIA_00713 ANIA_00747 ANIA_00771 ANIA_00870 ANIA_01014 ANIA_01063 ANIA_01094 ANIA_01174 ANIA_01189 ANIA_01290 ANIA_01523 ANIA_01534 ANIA_01577 ANIA_01624 ANIA_01628 ANIA_01631 ANIA_02052 ANIA_02300 ANIA_02306 ANIA_02308 ANIA_02315 ANIA_02316 ANIA_02414 ANIA_02465 ANIA_02466 ANIA_02475 ANI…
0.0057091	20	31	2.07702	Organellar large ribosomal subunit	http://amigo.geneontology.org/amigo/term/GO:0000315	ANIA_00116 ANIA_00123 ANIA_01095 ANIA_01636 ANIA_01770 ANIA_01970 ANIA_02057 ANIA_02949 ANIA_03458 ANIA_03635 ANIA_04308 ANIA_04652 ANIA_05897 ANIA_06302 ANIA_06891 ANIA_06904 ANIA_08794 ANIA_09469 ANIA_10922 ANIA_11631
0.0057091	20	31	2.07702	Mitochondrial large ribosomal subunit	http://amigo.geneontology.org/amigo/term/GO:0005762	ANIA_00116 ANIA_00123 ANIA_01095 ANIA_01636 ANIA_01770 ANIA_01970 ANIA_02057 ANIA_02949 ANIA_03458 ANIA_03635 ANIA_04308 ANIA_04652 ANIA_05897 ANIA_06302 ANIA_06891 ANIA_06904 ANIA_08794 ANIA_09469 ANIA_10922 ANIA_11631
0.00591006	12	15	2.5755	Protein import into mitochondrial matrix	http://amigo.geneontology.org/amigo/term/GO:0030150	ANIA_00559 ANIA_01105 ANIA_01281 ANIA_01892 ANIA_04490 ANIA_04559 ANIA_04633 ANIA_05693 ANIA_06248 ANIA_06348 ANIA_09118 ANIA_10828
0.00591006	12	15	2.5755	Cytochrome complex	http://amigo.geneontology.org/amigo/term/GO:0070069	ANIA_00357 ANIA_00747 ANIA_02306 ANIA_02316 ANIA_03922 ANIA_04388 ANIA_05597 ANIA_05969 ANIA_06255 ANIA_08118 ANIA_10553 ANIA_10585
0.00663889	80	183	1.41511	Proton transmembrane transporter activity	http://amigo.geneontology.org/amigo/term/GO:0015078	ANIA_00252 ANIA_00357 ANIA_00501 ANIA_00713 ANIA_00747 ANIA_00943 ANIA_01189 ANIA_01290 ANIA_01523 ANIA_01534 ANIA_01577 ANIA_01624 ANIA_01628 ANIA_02306 ANIA_02308 ANIA_02315 ANIA_02316 ANIA_02465 ANIA_02466 ANIA_02475 ANIA_02544 ANIA_02585 ANIA_02665 ANIA_02892 ANIA_02958 ANIA_02974 ANIA_03088 ANIA_03210 ANIA_03220 ANIA_03357 ANIA_04148 ANIA_04150 ANIA_04277 ANIA_04388 ANIA_04621 ANIA_04836 ANI…
0.00844646	9	12	2.89744	Protein refolding	http://amigo.geneontology.org/amigo/term/GO:0042026	ANIA_00858 ANIA_01163 ANIA_02062 ANIA_02432 ANIA_05129 ANIA_06010 ANIA_06089 ANIA_09101 ANIA_10778
0.0118311	7	7	3.21938	Mitochondrial respiratory chain complex III	http://amigo.geneontology.org/amigo/term/GO:0005750	ANIA_00357 ANIA_00747 ANIA_02306 ANIA_03922 ANIA_04388 ANIA_05597 ANIA_05969
0.0118311	7	7	3.21938	Respiratory chain complex III	http://amigo.geneontology.org/amigo/term/GO:0045275	ANIA_00357 ANIA_00747 ANIA_02306 ANIA_03922 ANIA_04388 ANIA_05597 ANIA_05969
0.0118311	7	7	3.21938	Ubiquinol-cytochrome-c reductase activity	http://amigo.geneontology.org/amigo/term/GO:0008121	ANIA_00357 ANIA_00747 ANIA_02306 ANIA_04388 ANIA_05597 ANIA_05969 ANIA_08273
0.0139702	33	63	1.68634	Electron transport chain	http://amigo.geneontology.org/amigo/term/GO:0022900	ANIA_00357 ANIA_00394 ANIA_00747 ANIA_00896 ANIA_01063 ANIA_02306 ANIA_02316 ANIA_02332 ANIA_02414 ANIA_02916 ANIA_03862 ANIA_03922 ANIA_04164 ANIA_04288 ANIA_04304 ANIA_04388 ANIA_04740 ANIA_04977 ANIA_05597 ANIA_05629 ANIA_05703 ANIA_05969 ANIA_06246 ANIA_06255 ANIA_07500 ANIA_07629 ANIA_08049 ANIA_08118 ANIA_08273 ANIA_08785 ANIA_08793 ANIA_10553 ANIA_10585
0.0139702	33	63	1.68634	Electron transfer activity	http://amigo.geneontology.org/amigo/term/GO:0009055	ANIA_00357 ANIA_00394 ANIA_00630 ANIA_00747 ANIA_00932 ANIA_01063 ANIA_01094 ANIA_02306 ANIA_02316 ANIA_02332 ANIA_02414 ANIA_02916 ANIA_03011 ANIA_04288 ANIA_04304 ANIA_04388 ANIA_04977 ANIA_05597 ANIA_05629 ANIA_05703 ANIA_05969 ANIA_06246 ANIA_06255 ANIA_08118 ANIA_08273 ANIA_08763 ANIA_08793 ANIA_09078 ANIA_10229 ANIA_10350 ANIA_10553 ANIA_10585 ANIA_11377
0.0198697	19	31	1.97317	Protein transmembrane import into intracellular organelle	http://amigo.geneontology.org/amigo/term/GO:0044743	ANIA_00122 ANIA_00559 ANIA_01105 ANIA_01281 ANIA_01511 ANIA_01892 ANIA_02432 ANIA_04490 ANIA_04559 ANIA_04633 ANIA_05681 ANIA_05693 ANIA_06089 ANIA_06248 ANIA_06258 ANIA_06348 ANIA_09118 ANIA_10828 ANIA_10925
0.0198697	19	31	1.97317	Transmembrane transporter complex	http://amigo.geneontology.org/amigo/term/GO:1902495	ANIA_00357 ANIA_00747 ANIA_01063 ANIA_02306 ANIA_03922 ANIA_04288 ANIA_04388 ANIA_05167 ANIA_05597 ANIA_05969 ANIA_06635 ANIA_07561 ANIA_07629 ANIA_08049 ANIA_08763 ANIA_09078 ANIA_10229 ANIA_10250 ANIA_10525
0.021508	66	150	1.41653	Establishment of protein localization to organelle	http://amigo.geneontology.org/amigo/term/GO:0072594	ANIA_00056 ANIA_00122 ANIA_00417 ANIA_00559 ANIA_00643 ANIA_00747 ANIA_00821 ANIA_00831 ANIA_00834 ANIA_01064 ANIA_01089 ANIA_01104 ANIA_01105 ANIA_01281 ANIA_01511 ANIA_01892 ANIA_02014 ANIA_02062 ANIA_02071 ANIA_02432 ANIA_02939 ANIA_03003 ANIA_03803 ANIA_03842 ANIA_03864 ANIA_04076 ANIA_04170 ANIA_04490 ANIA_04559 ANIA_04589 ANIA_04633 ANIA_04876 ANIA_04899 ANIA_04915 ANIA_05482 ANIA_05536 ANI…
0.0220935	18	29	1.99823	Inorganic anion transmembrane transport	http://amigo.geneontology.org/amigo/term/GO:0098661	ANIA_00601 ANIA_00870 ANIA_02308 ANIA_02368 ANIA_02477 ANIA_02730 ANIA_03157 ANIA_03301 ANIA_03781 ANIA_04478 ANIA_04733 ANIA_04904 ANIA_06254 ANIA_07165 ANIA_08956 ANIA_09370 ANIA_10782 ANIA_11011
0.0224129	8	9	2.86167	Mitochondrial electron transport, ubiquinol to cytochrome c	http://amigo.geneontology.org/amigo/term/GO:0006122	ANIA_00357 ANIA_00747 ANIA_02306 ANIA_03922 ANIA_04388 ANIA_05597 ANIA_05969 ANIA_06246
0.0241961	17	27	2.02702	Integral component of Golgi membrane	http://amigo.geneontology.org/amigo/term/GO:0030173	ANIA_00762 ANIA_01620 ANIA_01969 ANIA_02738 ANIA_03439 ANIA_03576 ANIA_03583 ANIA_04068 ANIA_04716 ANIA_06628 ANIA_07534 ANIA_07562 ANIA_07601 ANIA_07672 ANIA_10033 ANIA_10508 ANIA_10676
0.0241961	17	27	2.02702	Intrinsic component of Golgi membrane	http://amigo.geneontology.org/amigo/term/GO:0031228	ANIA_00762 ANIA_01620 ANIA_01969 ANIA_02738 ANIA_03439 ANIA_03576 ANIA_03583 ANIA_04068 ANIA_04716 ANIA_06628 ANIA_07534 ANIA_07562 ANIA_07601 ANIA_07672 ANIA_10033 ANIA_10508 ANIA_10676
0.0250161	29	55	1.69749	Conidium formation	http://amigo.geneontology.org/amigo/term/GO:0048315	ANIA_00055 ANIA_00162 ANIA_00279 ANIA_00363 ANIA_00422 ANIA_00651 ANIA_00973 ANIA_01016 ANIA_01937 ANIA_01959 ANIA_02421 ANIA_03913 ANIA_04566 ANIA_05086 ANIA_05156 ANIA_05296 ANIA_05755 ANIA_05893 ANIA_06197 ANIA_06230 ANIA_06317 ANIA_06318 ANIA_06635 ANIA_06715 ANIA_07542 ANIA_07697 ANIA_07757 ANIA_08129 ANIA_08842
0.0250161	29	55	1.69749	Conidium development	http://amigo.geneontology.org/amigo/term/GO:0061794	ANIA_00055 ANIA_00162 ANIA_00279 ANIA_00363 ANIA_00422 ANIA_00651 ANIA_00973 ANIA_01016 ANIA_01937 ANIA_01959 ANIA_02421 ANIA_03913 ANIA_04566 ANIA_05086 ANIA_05156 ANIA_05296 ANIA_05755 ANIA_05893 ANIA_06197 ANIA_06230 ANIA_06317 ANIA_06318 ANIA_06635 ANIA_06715 ANIA_07542 ANIA_07697 ANIA_07757 ANIA_08129 ANIA_08842
0.0250161	29	55	1.69749	Oxidoreductase complex	http://amigo.geneontology.org/amigo/term/GO:1990204	ANIA_00357 ANIA_00747 ANIA_00896 ANIA_01063 ANIA_01074 ANIA_01396 ANIA_02306 ANIA_02916 ANIA_03466 ANIA_03922 ANIA_04288 ANIA_04388 ANIA_04977 ANIA_05457 ANIA_05571 ANIA_05597 ANIA_05969 ANIA_06635 ANIA_06792 ANIA_07561 ANIA_07629 ANIA_08049 ANIA_08763 ANIA_08793 ANIA_09078 ANIA_09403 ANIA_10229 ANIA_10525 ANIA_10901
0.028233	9	13	2.63404	Chaperone cofactor-dependent protein refolding	http://amigo.geneontology.org/amigo/term/GO:0051085	ANIA_00858 ANIA_01163 ANIA_02062 ANIA_02238 ANIA_02432 ANIA_05129 ANIA_06010 ANIA_09101 ANIA_10778
0.028233	9	11	2.63404	Perinuclear region of cytoplasm	http://amigo.geneontology.org/amigo/term/GO:0048471	ANIA_00295 ANIA_04208 ANIA_04615 ANIA_04992 ANIA_05668 ANIA_07571 ANIA_08197 ANIA_08269 ANIA_09063
0.028233	9	11	2.63404	Protein transmembrane transporter activity	http://amigo.geneontology.org/amigo/term/GO:0008320	ANIA_00559 ANIA_00834 ANIA_01892 ANIA_04589 ANIA_06348 ANIA_07687 ANIA_08059 ANIA_10159 ANIA_10828
0.028233	9	11	2.63404	Macromolecule transmembrane transporter activity	http://amigo.geneontology.org/amigo/term/GO:0022884	ANIA_00559 ANIA_00834 ANIA_01892 ANIA_04589 ANIA_06348 ANIA_07687 ANIA_08059 ANIA_10159 ANIA_10828
0.0310108	19	33	1.91151	Mitochondrial membrane organization	http://amigo.geneontology.org/amigo/term/GO:0007006	ANIA_00559 ANIA_00821 ANIA_01093 ANIA_01105 ANIA_01347 ANIA_02939 ANIA_04064 ANIA_04557 ANIA_04633 ANIA_06306 ANIA_06397 ANIA_07549 ANIA_07649 ANIA_08059 ANIA_08229 ANIA_10159 ANIA_10466 ANIA_10828 ANIA_11136
0.0325128	6	6	3.21938	Trehalose biosynthetic process	http://amigo.geneontology.org/amigo/term/GO:0005992	ANIA_00363 ANIA_01959 ANIA_03441 ANIA_05523 ANIA_08639 ANIA_10533
0.0326734	84	203	1.33875	Active ion transmembrane transporter activity	http://amigo.geneontology.org/amigo/term/GO:0022853	ANIA_00218 ANIA_00252 ANIA_00357 ANIA_00501 ANIA_00713 ANIA_00747 ANIA_01189 ANIA_01290 ANIA_01523 ANIA_01534 ANIA_01577 ANIA_01624 ANIA_01628 ANIA_02306 ANIA_02308 ANIA_02315 ANIA_02316 ANIA_02465 ANIA_02466 ANIA_02475 ANIA_02544 ANIA_02585 ANIA_02665 ANIA_02730 ANIA_02892 ANIA_02958 ANIA_02974 ANIA_03088 ANIA_03157 ANIA_03210 ANIA_03220 ANIA_03357 ANIA_03781 ANIA_04064 ANIA_04148 ANIA_04150 ANI…
0.0327891	39	81	1.55007	Asexual sporulation	http://amigo.geneontology.org/amigo/term/GO:0030436	ANIA_00055 ANIA_00082 ANIA_00162 ANIA_00279 ANIA_00363 ANIA_00422 ANIA_00453 ANIA_00651 ANIA_00973 ANIA_01016 ANIA_01037 ANIA_01560 ANIA_01937 ANIA_01959 ANIA_02421 ANIA_02919 ANIA_03113 ANIA_03913 ANIA_04566 ANIA_04570 ANIA_05086 ANIA_05156 ANIA_05296 ANIA_05660 ANIA_05755 ANIA_05893 ANIA_06197 ANIA_06230 ANIA_06317 ANIA_06318 ANIA_06635 ANIA_06715 ANIA_06731 ANIA_07513 ANIA_07542 ANIA_07697 ANI…
0.0368044	21	39	1.82721	Response to topologically incorrect protein	http://amigo.geneontology.org/amigo/term/GO:0035966	ANIA_00787 ANIA_00858 ANIA_00927 ANIA_01163 ANIA_01488 ANIA_01536 ANIA_02062 ANIA_02238 ANIA_02432 ANIA_03592 ANIA_05129 ANIA_05906 ANIA_06010 ANIA_06089 ANIA_08290 ANIA_08817 ANIA_09397 ANIA_10006 ANIA_10241 ANIA_10877 ANIA_11129
0.0382085	26	50	1.70824	Mitochondrial gene expression	http://amigo.geneontology.org/amigo/term/GO:0140053	ANIA_00123 ANIA_01083 ANIA_01084 ANIA_01954 ANIA_02057 ANIA_03010 ANIA_03034 ANIA_03173 ANIA_03603 ANIA_03832 ANIA_04875 ANIA_04954 ANIA_05897 ANIA_06039 ANIA_06302 ANIA_06526 ANIA_06540 ANIA_06577 ANIA_06904 ANIA_07449 ANIA_07609 ANIA_07699 ANIA_07701 ANIA_08780 ANIA_08794 ANIA_10923
0.0433798	59	139	1.40699	Membrane organization	http://amigo.geneontology.org/amigo/term/GO:0061024	ANIA_00281 ANIA_00559 ANIA_00571 ANIA_00573 ANIA_00627 ANIA_00802 ANIA_00803 ANIA_00821 ANIA_01093 ANIA_01105 ANIA_01229 ANIA_01347 ANIA_01365 ANIA_01771 ANIA_01912 ANIA_02011 ANIA_02048 ANIA_02279 ANIA_02419 ANIA_02516 ANIA_02939 ANIA_03752 ANIA_03842 ANIA_03910 ANIA_04045 ANIA_04064 ANIA_04240 ANIA_04317 ANIA_04342 ANIA_04406 ANIA_04416 ANIA_04557 ANIA_04601 ANIA_04633 ANIA_04876 ANIA_04997 ANI…
0.0438311	16	26	1.98116	NADH dehydrogenase activity	http://amigo.geneontology.org/amigo/term/GO:0003954	ANIA_00432 ANIA_00630 ANIA_01063 ANIA_01094 ANIA_01860 ANIA_02414 ANIA_03011 ANIA_03632 ANIA_04288 ANIA_05629 ANIA_05703 ANIA_08763 ANIA_09078 ANIA_10229 ANIA_10440 ANIA_11377
0.0438311	16	28	1.98116	Response to unfolded protein	http://amigo.geneontology.org/amigo/term/GO:0006986	ANIA_00787 ANIA_00858 ANIA_01163 ANIA_01488 ANIA_01536 ANIA_02062 ANIA_02432 ANIA_03592 ANIA_05129 ANIA_06010 ANIA_06089 ANIA_08290 ANIA_08817 ANIA_09397 ANIA_10241 ANIA_11129
0.0438552	25	47	1.71244	Organophosphate ester transport	http://amigo.geneontology.org/amigo/term/GO:0015748	ANIA_00346 ANIA_00821 ANIA_00870 ANIA_02011 ANIA_02055 ANIA_02173 ANIA_02864 ANIA_04064 ANIA_04280 ANIA_04287 ANIA_04387 ANIA_04836 ANIA_04997 ANIA_05132 ANIA_05356 ANIA_06614 ANIA_06853 ANIA_07287 ANIA_07304 ANIA_08233 ANIA_08248 ANIA_08785 ANIA_10303 ANIA_10622 ANIA_10983
0.0472976	394	1139	1.1275	Cellular component organization	http://amigo.geneontology.org/amigo/term/GO:0016043	ANIA_00090 ANIA_00091 ANIA_00098 ANIA_00116 ANIA_00122 ANIA_00133 ANIA_00162 ANIA_00253 ANIA_00281 ANIA_00316 ANIA_00359 ANIA_00391 ANIA_00447 ANIA_00448 ANIA_00470 ANIA_00559 ANIA_00571 ANIA_00573 ANIA_00604 ANIA_00627 ANIA_00643 ANIA_00664 ANIA_00697 ANIA_00715 ANIA_00728 ANIA_00733 ANIA_00741 ANIA_00747 ANIA_00794 ANIA_00799 ANIA_00802 ANIA_00803 ANIA_00808 ANIA_00821 ANIA_00837 ANIA_00855 ANI…
0.047628	19	33	1.85358	Pyrophosphate hydrolysis-driven proton transmembrane transporter activity	http://amigo.geneontology.org/amigo/term/GO:0009678	ANIA_00252 ANIA_01189 ANIA_01523 ANIA_01534 ANIA_01624 ANIA_01628 ANIA_02315 ANIA_03088 ANIA_04859 ANIA_04920 ANIA_05083 ANIA_05606 ANIA_05743 ANIA_06127 ANIA_06287 ANIA_06631 ANIA_06642 ANIA_09107 ANIA_10982

## Sheet: Anid wt NaCl
NaCl vs. Untreated	A. nidulans	THS30	downregulated genes	DEG; log2FC<-2
Enrichment FDR	nGenes	Pathway Genes	Fold Enrichment	Pathway	URL	Genes
3.02689e-07	32	352	3.32205	Host cellular component	http://amigo.geneontology.org/amigo/term/GO:0018995	ANIA_00197 ANIA_02324 ANIA_03120 ANIA_03269 ANIA_03290 ANIA_03986 ANIA_04123 ANIA_04606 ANIA_04626 ANIA_05070 ANIA_05274 ANIA_05431 ANIA_05609 ANIA_05775 ANIA_06747 ANIA_07592 ANIA_07896 ANIA_08079 ANIA_08164 ANIA_08298 ANIA_08355 ANIA_08426 ANIA_08431 ANIA_08655 ANIA_08774 ANIA_08938 ANIA_09458 ANIA_09516 ANIA_10331 ANIA_10423 ANIA_10600 ANIA_10775
3.02689e-07	32	352	3.32205	Host cell part	http://amigo.geneontology.org/amigo/term/GO:0033643	ANIA_00197 ANIA_02324 ANIA_03120 ANIA_03269 ANIA_03290 ANIA_03986 ANIA_04123 ANIA_04606 ANIA_04626 ANIA_05070 ANIA_05274 ANIA_05431 ANIA_05609 ANIA_05775 ANIA_06747 ANIA_07592 ANIA_07896 ANIA_08079 ANIA_08164 ANIA_08298 ANIA_08355 ANIA_08426 ANIA_08431 ANIA_08655 ANIA_08774 ANIA_08938 ANIA_09458 ANIA_09516 ANIA_10331 ANIA_10423 ANIA_10600 ANIA_10775
3.02689e-07	32	352	3.32205	Host intracellular part	http://amigo.geneontology.org/amigo/term/GO:0033646	ANIA_00197 ANIA_02324 ANIA_03120 ANIA_03269 ANIA_03290 ANIA_03986 ANIA_04123 ANIA_04606 ANIA_04626 ANIA_05070 ANIA_05274 ANIA_05431 ANIA_05609 ANIA_05775 ANIA_06747 ANIA_07592 ANIA_07896 ANIA_08079 ANIA_08164 ANIA_08298 ANIA_08355 ANIA_08426 ANIA_08431 ANIA_08655 ANIA_08774 ANIA_08938 ANIA_09458 ANIA_09516 ANIA_10331 ANIA_10423 ANIA_10600 ANIA_10775
3.02689e-07	32	351	3.33162	Host intracellular organelle	http://amigo.geneontology.org/amigo/term/GO:0033647	ANIA_00197 ANIA_02324 ANIA_03120 ANIA_03269 ANIA_03290 ANIA_03986 ANIA_04123 ANIA_04606 ANIA_04626 ANIA_05070 ANIA_05274 ANIA_05431 ANIA_05609 ANIA_05775 ANIA_06747 ANIA_07592 ANIA_07896 ANIA_08079 ANIA_08164 ANIA_08298 ANIA_08355 ANIA_08426 ANIA_08431 ANIA_08655 ANIA_08774 ANIA_08938 ANIA_09458 ANIA_09516 ANIA_10331 ANIA_10423 ANIA_10600 ANIA_10775
3.02689e-07	32	351	3.33162	Host intracellular membrane-bounded organelle	http://amigo.geneontology.org/amigo/term/GO:0033648	ANIA_00197 ANIA_02324 ANIA_03120 ANIA_03269 ANIA_03290 ANIA_03986 ANIA_04123 ANIA_04606 ANIA_04626 ANIA_05070 ANIA_05274 ANIA_05431 ANIA_05609 ANIA_05775 ANIA_06747 ANIA_07592 ANIA_07896 ANIA_08079 ANIA_08164 ANIA_08298 ANIA_08355 ANIA_08426 ANIA_08431 ANIA_08655 ANIA_08774 ANIA_08938 ANIA_09458 ANIA_09516 ANIA_10331 ANIA_10423 ANIA_10600 ANIA_10775
3.02689e-07	32	351	3.33162	Host cell nucleus	http://amigo.geneontology.org/amigo/term/GO:0042025	ANIA_00197 ANIA_02324 ANIA_03120 ANIA_03269 ANIA_03290 ANIA_03986 ANIA_04123 ANIA_04606 ANIA_04626 ANIA_05070 ANIA_05274 ANIA_05431 ANIA_05609 ANIA_05775 ANIA_06747 ANIA_07592 ANIA_07896 ANIA_08079 ANIA_08164 ANIA_08298 ANIA_08355 ANIA_08426 ANIA_08431 ANIA_08655 ANIA_08774 ANIA_08938 ANIA_09458 ANIA_09516 ANIA_10331 ANIA_10423 ANIA_10600 ANIA_10775
3.02689e-07	32	352	3.32205	Host intracellular region	http://amigo.geneontology.org/amigo/term/GO:0043656	ANIA_00197 ANIA_02324 ANIA_03120 ANIA_03269 ANIA_03290 ANIA_03986 ANIA_04123 ANIA_04606 ANIA_04626 ANIA_05070 ANIA_05274 ANIA_05431 ANIA_05609 ANIA_05775 ANIA_06747 ANIA_07592 ANIA_07896 ANIA_08079 ANIA_08164 ANIA_08298 ANIA_08355 ANIA_08426 ANIA_08431 ANIA_08655 ANIA_08774 ANIA_08938 ANIA_09458 ANIA_09516 ANIA_10331 ANIA_10423 ANIA_10600 ANIA_10775
3.02689e-07	32	352	3.32205	Host cell	http://amigo.geneontology.org/amigo/term/GO:0043657	ANIA_00197 ANIA_02324 ANIA_03120 ANIA_03269 ANIA_03290 ANIA_03986 ANIA_04123 ANIA_04606 ANIA_04626 ANIA_05070 ANIA_05274 ANIA_05431 ANIA_05609 ANIA_05775 ANIA_06747 ANIA_07592 ANIA_07896 ANIA_08079 ANIA_08164 ANIA_08298 ANIA_08355 ANIA_08426 ANIA_08431 ANIA_08655 ANIA_08774 ANIA_08938 ANIA_09458 ANIA_09516 ANIA_10331 ANIA_10423 ANIA_10600 ANIA_10775
3.02689e-07	35	415	3.09915	DNA-binding transcription factor activity, RNA polymerase II-specific	http://amigo.geneontology.org/amigo/term/GO:0000981	ANIA_00197 ANIA_02324 ANIA_02652 ANIA_03120 ANIA_03269 ANIA_03290 ANIA_03986 ANIA_04123 ANIA_04606 ANIA_04626 ANIA_05070 ANIA_05274 ANIA_05431 ANIA_05609 ANIA_05775 ANIA_06747 ANIA_07592 ANIA_07896 ANIA_08079 ANIA_08088 ANIA_08164 ANIA_08298 ANIA_08355 ANIA_08426 ANIA_08431 ANIA_08655 ANIA_08774 ANIA_08938 ANIA_09458 ANIA_09516 ANIA_10331 ANIA_10423 ANIA_10600 ANIA_10775 ANIA_11197
9.53355e-07	39	523	2.74652	Zinc ion binding	http://amigo.geneontology.org/amigo/term/GO:0008270	ANIA_00197 ANIA_02195 ANIA_02324 ANIA_03120 ANIA_03269 ANIA_03290 ANIA_03986 ANIA_04123 ANIA_04606 ANIA_04626 ANIA_04821 ANIA_05070 ANIA_05274 ANIA_05431 ANIA_05434 ANIA_05609 ANIA_05775 ANIA_06747 ANIA_07592 ANIA_07830 ANIA_07896 ANIA_08079 ANIA_08164 ANIA_08298 ANIA_08355 ANIA_08426 ANIA_08431 ANIA_08655 ANIA_08774 ANIA_08938 ANIA_08979 ANIA_09458 ANIA_09516 ANIA_10331 ANIA_10423 ANIA_10600 ANI…
1.04398e-06	36	461	2.87739	DNA-binding transcription factor activity	http://amigo.geneontology.org/amigo/term/GO:0003700	ANIA_00197 ANIA_02324 ANIA_02652 ANIA_03120 ANIA_03269 ANIA_03290 ANIA_03986 ANIA_04123 ANIA_04606 ANIA_04626 ANIA_05070 ANIA_05274 ANIA_05431 ANIA_05609 ANIA_05775 ANIA_06747 ANIA_07592 ANIA_07896 ANIA_08079 ANIA_08088 ANIA_08164 ANIA_08298 ANIA_08355 ANIA_08426 ANIA_08431 ANIA_08655 ANIA_08774 ANIA_08938 ANIA_09458 ANIA_09516 ANIA_10331 ANIA_10423 ANIA_10600 ANIA_10623 ANIA_10775 ANIA_11197
5.45334e-06	41	604	2.48527	Regulation of transcription by RNA polymerase II	http://amigo.geneontology.org/amigo/term/GO:0006357	ANIA_00197 ANIA_01867 ANIA_02324 ANIA_02652 ANIA_03120 ANIA_03269 ANIA_03290 ANIA_03986 ANIA_04123 ANIA_04606 ANIA_04626 ANIA_04821 ANIA_05070 ANIA_05274 ANIA_05431 ANIA_05609 ANIA_05775 ANIA_06569 ANIA_06747 ANIA_07592 ANIA_07896 ANIA_08079 ANIA_08088 ANIA_08164 ANIA_08298 ANIA_08355 ANIA_08369 ANIA_08426 ANIA_08431 ANIA_08655 ANIA_08774 ANIA_08938 ANIA_09458 ANIA_09516 ANIA_10331 ANIA_10391 ANI…
1.93943e-05	41	634	2.36616	Transcription by RNA polymerase II	http://amigo.geneontology.org/amigo/term/GO:0006366	ANIA_00197 ANIA_01867 ANIA_02324 ANIA_02652 ANIA_03120 ANIA_03269 ANIA_03290 ANIA_03986 ANIA_04123 ANIA_04606 ANIA_04626 ANIA_04821 ANIA_05070 ANIA_05274 ANIA_05431 ANIA_05609 ANIA_05775 ANIA_06569 ANIA_06747 ANIA_07592 ANIA_07896 ANIA_08079 ANIA_08088 ANIA_08164 ANIA_08298 ANIA_08355 ANIA_08369 ANIA_08426 ANIA_08431 ANIA_08655 ANIA_08774 ANIA_08938 ANIA_09458 ANIA_09516 ANIA_10331 ANIA_10391 ANI…
2.13519e-05	45	738	2.23621	Transition metal ion binding	http://amigo.geneontology.org/amigo/term/GO:0046914	ANIA_00197 ANIA_01006 ANIA_02195 ANIA_02324 ANIA_03120 ANIA_03269 ANIA_03290 ANIA_03497 ANIA_03609 ANIA_03986 ANIA_04117 ANIA_04123 ANIA_04606 ANIA_04626 ANIA_04821 ANIA_05070 ANIA_05274 ANIA_05397 ANIA_05431 ANIA_05434 ANIA_05609 ANIA_05775 ANIA_06747 ANIA_07592 ANIA_07830 ANIA_07896 ANIA_08079 ANIA_08164 ANIA_08298 ANIA_08355 ANIA_08426 ANIA_08431 ANIA_08655 ANIA_08774 ANIA_08938 ANIA_08979 ANI…
2.13519e-05	36	524	2.5254	Transcription regulator activity	http://amigo.geneontology.org/amigo/term/GO:0140110	ANIA_00197 ANIA_02324 ANIA_02652 ANIA_03120 ANIA_03269 ANIA_03290 ANIA_03986 ANIA_04123 ANIA_04606 ANIA_04626 ANIA_05070 ANIA_05274 ANIA_05431 ANIA_05609 ANIA_05775 ANIA_06747 ANIA_07592 ANIA_07896 ANIA_08079 ANIA_08088 ANIA_08164 ANIA_08298 ANIA_08355 ANIA_08426 ANIA_08431 ANIA_08655 ANIA_08774 ANIA_08938 ANIA_09458 ANIA_09516 ANIA_10331 ANIA_10423 ANIA_10600 ANIA_10623 ANIA_10775 ANIA_11197
0.000132485	43	743	2.12223	Regulation of nucleic acid-templated transcription	http://amigo.geneontology.org/amigo/term/GO:1903506	ANIA_00197 ANIA_01867 ANIA_02324 ANIA_02652 ANIA_03120 ANIA_03269 ANIA_03290 ANIA_03986 ANIA_04123 ANIA_04606 ANIA_04626 ANIA_04821 ANIA_05070 ANIA_05274 ANIA_05431 ANIA_05609 ANIA_05775 ANIA_06569 ANIA_06747 ANIA_07592 ANIA_07896 ANIA_08079 ANIA_08088 ANIA_08092 ANIA_08164 ANIA_08298 ANIA_08355 ANIA_08369 ANIA_08426 ANIA_08431 ANIA_08655 ANIA_08774 ANIA_08860 ANIA_08938 ANIA_09458 ANIA_09516 ANI…
0.000132485	43	743	2.12223	Regulation of RNA biosynthetic process	http://amigo.geneontology.org/amigo/term/GO:2001141	ANIA_00197 ANIA_01867 ANIA_02324 ANIA_02652 ANIA_03120 ANIA_03269 ANIA_03290 ANIA_03986 ANIA_04123 ANIA_04606 ANIA_04626 ANIA_04821 ANIA_05070 ANIA_05274 ANIA_05431 ANIA_05609 ANIA_05775 ANIA_06569 ANIA_06747 ANIA_07592 ANIA_07896 ANIA_08079 ANIA_08088 ANIA_08092 ANIA_08164 ANIA_08298 ANIA_08355 ANIA_08369 ANIA_08426 ANIA_08431 ANIA_08655 ANIA_08774 ANIA_08860 ANIA_08938 ANIA_09458 ANIA_09516 ANI…
0.000132485	43	741	2.12804	Regulation of transcription, DNA-templated	http://amigo.geneontology.org/amigo/term/GO:0006355	ANIA_00197 ANIA_01867 ANIA_02324 ANIA_02652 ANIA_03120 ANIA_03269 ANIA_03290 ANIA_03986 ANIA_04123 ANIA_04606 ANIA_04626 ANIA_04821 ANIA_05070 ANIA_05274 ANIA_05431 ANIA_05609 ANIA_05775 ANIA_06569 ANIA_06747 ANIA_07592 ANIA_07896 ANIA_08079 ANIA_08088 ANIA_08092 ANIA_08164 ANIA_08298 ANIA_08355 ANIA_08369 ANIA_08426 ANIA_08431 ANIA_08655 ANIA_08774 ANIA_08860 ANIA_08938 ANIA_09458 ANIA_09516 ANI…
0.000302541	44	795	2.03014	Regulation of RNA metabolic process	http://amigo.geneontology.org/amigo/term/GO:0051252	ANIA_00197 ANIA_01867 ANIA_02324 ANIA_02652 ANIA_03120 ANIA_03269 ANIA_03290 ANIA_03986 ANIA_04123 ANIA_04606 ANIA_04626 ANIA_04821 ANIA_05070 ANIA_05274 ANIA_05431 ANIA_05609 ANIA_05775 ANIA_06569 ANIA_06600 ANIA_06747 ANIA_07592 ANIA_07896 ANIA_08079 ANIA_08088 ANIA_08092 ANIA_08164 ANIA_08298 ANIA_08355 ANIA_08369 ANIA_08426 ANIA_08431 ANIA_08655 ANIA_08774 ANIA_08860 ANIA_08938 ANIA_09458 ANI…
0.000475981	25	346	2.67214	Sequence-specific DNA binding	http://amigo.geneontology.org/amigo/term/GO:0043565	ANIA_00197 ANIA_02324 ANIA_02652 ANIA_03269 ANIA_03986 ANIA_04123 ANIA_04821 ANIA_05070 ANIA_05274 ANIA_05431 ANIA_05609 ANIA_07592 ANIA_07896 ANIA_08088 ANIA_08164 ANIA_08298 ANIA_08355 ANIA_08369 ANIA_08426 ANIA_08431 ANIA_08655 ANIA_09458 ANIA_10423 ANIA_10623 ANIA_11197
0.000476458	44	812	1.987	Regulation of nucleobase-containing compound metabolic process	http://amigo.geneontology.org/amigo/term/GO:0019219	ANIA_00197 ANIA_01867 ANIA_02324 ANIA_02652 ANIA_03120 ANIA_03269 ANIA_03290 ANIA_03986 ANIA_04123 ANIA_04606 ANIA_04626 ANIA_04821 ANIA_05070 ANIA_05274 ANIA_05431 ANIA_05609 ANIA_05775 ANIA_06569 ANIA_06600 ANIA_06747 ANIA_07592 ANIA_07896 ANIA_08079 ANIA_08088 ANIA_08092 ANIA_08164 ANIA_08298 ANIA_08355 ANIA_08369 ANIA_08426 ANIA_08431 ANIA_08655 ANIA_08774 ANIA_08860 ANIA_08938 ANIA_09458 ANI…
0.000784242	43	803	1.96394	Transcription, DNA-templated	http://amigo.geneontology.org/amigo/term/GO:0006351	ANIA_00197 ANIA_01867 ANIA_02324 ANIA_02652 ANIA_03120 ANIA_03269 ANIA_03290 ANIA_03986 ANIA_04123 ANIA_04606 ANIA_04626 ANIA_04821 ANIA_05070 ANIA_05274 ANIA_05431 ANIA_05609 ANIA_05775 ANIA_06569 ANIA_06747 ANIA_07592 ANIA_07896 ANIA_08079 ANIA_08088 ANIA_08092 ANIA_08164 ANIA_08298 ANIA_08355 ANIA_08369 ANIA_08426 ANIA_08431 ANIA_08655 ANIA_08774 ANIA_08860 ANIA_08938 ANIA_09458 ANIA_09516 ANI…
0.000798383	43	805	1.95898	Nucleic acid-templated transcription	http://amigo.geneontology.org/amigo/term/GO:0097659	ANIA_00197 ANIA_01867 ANIA_02324 ANIA_02652 ANIA_03120 ANIA_03269 ANIA_03290 ANIA_03986 ANIA_04123 ANIA_04606 ANIA_04626 ANIA_04821 ANIA_05070 ANIA_05274 ANIA_05431 ANIA_05609 ANIA_05775 ANIA_06569 ANIA_06747 ANIA_07592 ANIA_07896 ANIA_08079 ANIA_08088 ANIA_08092 ANIA_08164 ANIA_08298 ANIA_08355 ANIA_08369 ANIA_08426 ANIA_08431 ANIA_08655 ANIA_08774 ANIA_08860 ANIA_08938 ANIA_09458 ANIA_09516 ANI…
0.00086751	43	810	1.94671	RNA biosynthetic process	http://amigo.geneontology.org/amigo/term/GO:0032774	ANIA_00197 ANIA_01867 ANIA_02324 ANIA_02652 ANIA_03120 ANIA_03269 ANIA_03290 ANIA_03986 ANIA_04123 ANIA_04606 ANIA_04626 ANIA_04821 ANIA_05070 ANIA_05274 ANIA_05431 ANIA_05609 ANIA_05775 ANIA_06569 ANIA_06747 ANIA_07592 ANIA_07896 ANIA_08079 ANIA_08088 ANIA_08092 ANIA_08164 ANIA_08298 ANIA_08355 ANIA_08369 ANIA_08426 ANIA_08431 ANIA_08655 ANIA_08774 ANIA_08860 ANIA_08938 ANIA_09458 ANIA_09516 ANI…
0.00086751	44	837	1.92679	Regulation of cellular macromolecule biosynthetic process	http://amigo.geneontology.org/amigo/term/GO:2000112	ANIA_00197 ANIA_01867 ANIA_02160 ANIA_02324 ANIA_02652 ANIA_03120 ANIA_03269 ANIA_03290 ANIA_03986 ANIA_04123 ANIA_04606 ANIA_04626 ANIA_04821 ANIA_05070 ANIA_05274 ANIA_05431 ANIA_05609 ANIA_05775 ANIA_06569 ANIA_06747 ANIA_07592 ANIA_07896 ANIA_08079 ANIA_08088 ANIA_08092 ANIA_08164 ANIA_08298 ANIA_08355 ANIA_08369 ANIA_08426 ANIA_08431 ANIA_08655 ANIA_08774 ANIA_08860 ANIA_08938 ANIA_09458 ANI…
0.00086751	5	13	13.8951	ADP binding	http://amigo.geneontology.org/amigo/term/GO:0043531	ANIA_01580 ANIA_03881 ANIA_08322 ANIA_08545 ANIA_09426
0.000935695	44	842	1.91518	Regulation of macromolecule biosynthetic process	http://amigo.geneontology.org/amigo/term/GO:0010556	ANIA_00197 ANIA_01867 ANIA_02160 ANIA_02324 ANIA_02652 ANIA_03120 ANIA_03269 ANIA_03290 ANIA_03986 ANIA_04123 ANIA_04606 ANIA_04626 ANIA_04821 ANIA_05070 ANIA_05274 ANIA_05431 ANIA_05609 ANIA_05775 ANIA_06569 ANIA_06747 ANIA_07592 ANIA_07896 ANIA_08079 ANIA_08088 ANIA_08092 ANIA_08164 ANIA_08298 ANIA_08355 ANIA_08369 ANIA_08426 ANIA_08431 ANIA_08655 ANIA_08774 ANIA_08860 ANIA_08938 ANIA_09458 ANI…
0.00171029	44	864	1.86573	Regulation of cellular biosynthetic process	http://amigo.geneontology.org/amigo/term/GO:0031326	ANIA_00197 ANIA_01867 ANIA_02160 ANIA_02324 ANIA_02652 ANIA_03120 ANIA_03269 ANIA_03290 ANIA_03986 ANIA_04123 ANIA_04606 ANIA_04626 ANIA_04821 ANIA_05070 ANIA_05274 ANIA_05431 ANIA_05609 ANIA_05775 ANIA_06569 ANIA_06747 ANIA_07592 ANIA_07896 ANIA_08079 ANIA_08088 ANIA_08092 ANIA_08164 ANIA_08298 ANIA_08355 ANIA_08369 ANIA_08426 ANIA_08431 ANIA_08655 ANIA_08774 ANIA_08860 ANIA_08938 ANIA_09458 ANI…
0.0019011	44	869	1.85484	Regulation of biosynthetic process	http://amigo.geneontology.org/amigo/term/GO:0009889	ANIA_00197 ANIA_01867 ANIA_02160 ANIA_02324 ANIA_02652 ANIA_03120 ANIA_03269 ANIA_03290 ANIA_03986 ANIA_04123 ANIA_04606 ANIA_04626 ANIA_04821 ANIA_05070 ANIA_05274 ANIA_05431 ANIA_05609 ANIA_05775 ANIA_06569 ANIA_06747 ANIA_07592 ANIA_07896 ANIA_08079 ANIA_08088 ANIA_08092 ANIA_08164 ANIA_08298 ANIA_08355 ANIA_08369 ANIA_08426 ANIA_08431 ANIA_08655 ANIA_08774 ANIA_08860 ANIA_08938 ANIA_09458 ANI…
0.00238873	47	962	1.78923	Regulation of nitrogen compound metabolic process	http://amigo.geneontology.org/amigo/term/GO:0051171	ANIA_00197 ANIA_01867 ANIA_02324 ANIA_02652 ANIA_03120 ANIA_03269 ANIA_03290 ANIA_03986 ANIA_04123 ANIA_04606 ANIA_04626 ANIA_04821 ANIA_05070 ANIA_05274 ANIA_05431 ANIA_05609 ANIA_05708 ANIA_05775 ANIA_06569 ANIA_06600 ANIA_06747 ANIA_07592 ANIA_07896 ANIA_08079 ANIA_08088 ANIA_08092 ANIA_08164 ANIA_08298 ANIA_08355 ANIA_08369 ANIA_08426 ANIA_08431 ANIA_08655 ANIA_08774 ANIA_08777 ANIA_08860 ANI…
0.00270991	48	996	1.7641	Regulation of cellular metabolic process	http://amigo.geneontology.org/amigo/term/GO:0031323	ANIA_00197 ANIA_01867 ANIA_02160 ANIA_02324 ANIA_02652 ANIA_03120 ANIA_03269 ANIA_03290 ANIA_03986 ANIA_04123 ANIA_04606 ANIA_04626 ANIA_04821 ANIA_05070 ANIA_05274 ANIA_05431 ANIA_05609 ANIA_05708 ANIA_05775 ANIA_06569 ANIA_06600 ANIA_06747 ANIA_07592 ANIA_07896 ANIA_08079 ANIA_08088 ANIA_08092 ANIA_08164 ANIA_08298 ANIA_08355 ANIA_08369 ANIA_08426 ANIA_08431 ANIA_08655 ANIA_08774 ANIA_08777 ANI…
0.00542965	46	969	1.73834	Regulation of primary metabolic process	http://amigo.geneontology.org/amigo/term/GO:0080090	ANIA_00197 ANIA_01867 ANIA_02324 ANIA_02652 ANIA_03120 ANIA_03269 ANIA_03290 ANIA_03986 ANIA_04123 ANIA_04606 ANIA_04626 ANIA_04821 ANIA_05070 ANIA_05274 ANIA_05431 ANIA_05609 ANIA_05708 ANIA_05775 ANIA_06569 ANIA_06600 ANIA_06747 ANIA_07592 ANIA_07896 ANIA_08079 ANIA_08088 ANIA_08092 ANIA_08164 ANIA_08298 ANIA_08355 ANIA_08369 ANIA_08426 ANIA_08431 ANIA_08655 ANIA_08774 ANIA_08860 ANIA_08938 ANI…
0.00611649	44	919	1.75453	Regulation of gene expression	http://amigo.geneontology.org/amigo/term/GO:0010468	ANIA_00197 ANIA_01867 ANIA_02324 ANIA_02652 ANIA_03120 ANIA_03269 ANIA_03290 ANIA_03986 ANIA_04123 ANIA_04606 ANIA_04626 ANIA_04821 ANIA_05070 ANIA_05274 ANIA_05431 ANIA_05609 ANIA_05775 ANIA_06569 ANIA_06600 ANIA_06747 ANIA_07592 ANIA_07896 ANIA_08079 ANIA_08088 ANIA_08092 ANIA_08164 ANIA_08298 ANIA_08355 ANIA_08369 ANIA_08426 ANIA_08431 ANIA_08655 ANIA_08774 ANIA_08860 ANIA_08938 ANIA_09458 ANI…
0.00654341	10	89	4.05924	Metal ion transmembrane transporter activity	http://amigo.geneontology.org/amigo/term/GO:0046873	ANIA_00782 ANIA_05187 ANIA_05394 ANIA_06115 ANIA_06481 ANIA_06845 ANIA_06960 ANIA_08337 ANIA_08941 ANIA_10235
0.00731782	39	791	1.81334	DNA binding	http://amigo.geneontology.org/amigo/term/GO:0003677	ANIA_00197 ANIA_02324 ANIA_02652 ANIA_03120 ANIA_03269 ANIA_03290 ANIA_03986 ANIA_04123 ANIA_04606 ANIA_04626 ANIA_04821 ANIA_05070 ANIA_05274 ANIA_05431 ANIA_05609 ANIA_05775 ANIA_06569 ANIA_06747 ANIA_07538 ANIA_07592 ANIA_07896 ANIA_08079 ANIA_08088 ANIA_08164 ANIA_08298 ANIA_08355 ANIA_08369 ANIA_08426 ANIA_08431 ANIA_08655 ANIA_08938 ANIA_09458 ANIA_09516 ANIA_10331 ANIA_10423 ANIA_10600 ANI…
0.00831348	19	280	2.49607	Positive regulation of transcription, DNA-templated	http://amigo.geneontology.org/amigo/term/GO:0045893	ANIA_03269 ANIA_03290 ANIA_03986 ANIA_04123 ANIA_04821 ANIA_05431 ANIA_05609 ANIA_06569 ANIA_07592 ANIA_08092 ANIA_08164 ANIA_08355 ANIA_08431 ANIA_08774 ANIA_09458 ANIA_10423 ANIA_10600 ANIA_10775 ANIA_11197
0.00831348	18	258	2.57032	Positive regulation of transcription by RNA polymerase II	http://amigo.geneontology.org/amigo/term/GO:0045944	ANIA_03269 ANIA_03290 ANIA_03986 ANIA_04123 ANIA_04821 ANIA_05431 ANIA_05609 ANIA_06569 ANIA_07592 ANIA_08164 ANIA_08355 ANIA_08431 ANIA_08774 ANIA_09458 ANIA_10423 ANIA_10600 ANIA_10775 ANIA_11197
0.00906717	8	64	4.738	Nucleoside metabolic process	http://amigo.geneontology.org/amigo/term/GO:0009116	ANIA_01498 ANIA_01580 ANIA_03340 ANIA_03881 ANIA_07363 ANIA_08524 ANIA_08545 ANIA_09426
0.0102159	47	1036	1.66143	Regulation of macromolecule metabolic process	http://amigo.geneontology.org/amigo/term/GO:0060255	ANIA_00197 ANIA_01867 ANIA_02160 ANIA_02324 ANIA_02652 ANIA_03120 ANIA_03269 ANIA_03290 ANIA_03986 ANIA_04123 ANIA_04606 ANIA_04626 ANIA_04821 ANIA_05070 ANIA_05274 ANIA_05431 ANIA_05609 ANIA_05708 ANIA_05775 ANIA_06569 ANIA_06600 ANIA_06747 ANIA_07592 ANIA_07896 ANIA_08079 ANIA_08088 ANIA_08092 ANIA_08164 ANIA_08298 ANIA_08355 ANIA_08369 ANIA_08426 ANIA_08431 ANIA_08655 ANIA_08774 ANIA_08860 ANI…
0.0102159	19	287	2.43411	Positive regulation of RNA biosynthetic process	http://amigo.geneontology.org/amigo/term/GO:1902680	ANIA_03269 ANIA_03290 ANIA_03986 ANIA_04123 ANIA_04821 ANIA_05431 ANIA_05609 ANIA_06569 ANIA_07592 ANIA_08092 ANIA_08164 ANIA_08355 ANIA_08431 ANIA_08774 ANIA_09458 ANIA_10423 ANIA_10600 ANIA_10775 ANIA_11197
0.0102159	19	287	2.43411	Positive regulation of nucleic acid-templated transcription	http://amigo.geneontology.org/amigo/term/GO:1903508	ANIA_03269 ANIA_03290 ANIA_03986 ANIA_04123 ANIA_04821 ANIA_05431 ANIA_05609 ANIA_06569 ANIA_07592 ANIA_08092 ANIA_08164 ANIA_08355 ANIA_08431 ANIA_08774 ANIA_09458 ANIA_10423 ANIA_10600 ANIA_10775 ANIA_11197
0.0132685	48	1078	1.6298	Regulation of metabolic process	http://amigo.geneontology.org/amigo/term/GO:0019222	ANIA_00197 ANIA_01867 ANIA_02160 ANIA_02324 ANIA_02652 ANIA_03120 ANIA_03269 ANIA_03290 ANIA_03986 ANIA_04123 ANIA_04606 ANIA_04626 ANIA_04821 ANIA_05070 ANIA_05274 ANIA_05431 ANIA_05609 ANIA_05708 ANIA_05775 ANIA_06569 ANIA_06600 ANIA_06747 ANIA_07592 ANIA_07896 ANIA_08079 ANIA_08088 ANIA_08092 ANIA_08164 ANIA_08298 ANIA_08355 ANIA_08369 ANIA_08426 ANIA_08431 ANIA_08655 ANIA_08774 ANIA_08777 ANI…
0.0192237	4	15	9.63394	Oxidoreductase activity, acting on the CH-NH group of donors, oxygen as acceptor	http://amigo.geneontology.org/amigo/term/GO:0016647	ANIA_02350 ANIA_05025 ANIA_08162 ANIA_08657
0.0197222	7	54	4.68316	Transition metal ion transport	http://amigo.geneontology.org/amigo/term/GO:0000041	ANIA_03763 ANIA_05378 ANIA_05397 ANIA_06115 ANIA_06845 ANIA_08337 ANIA_08540
0.0197222	3	7	15.4831	Iron coordination entity transport	http://amigo.geneontology.org/amigo/term/GO:1901678	ANIA_03763 ANIA_05378 ANIA_08540
0.0197222	3	7	15.4831	Polyamine oxidase activity	http://amigo.geneontology.org/amigo/term/GO:0046592	ANIA_02350 ANIA_05025 ANIA_08162
0.0224651	8	76	4.01414	Glycosyl compound metabolic process	http://amigo.geneontology.org/amigo/term/GO:1901657	ANIA_01498 ANIA_01580 ANIA_03340 ANIA_03881 ANIA_07363 ANIA_08524 ANIA_08545 ANIA_09426
0.0224651	4	16	9.03182	Amidase activity	http://amigo.geneontology.org/amigo/term/GO:0004040	ANIA_02662 ANIA_08653 ANIA_08777 ANIA_09324
0.0231486	19	311	2.2432	Positive regulation of macromolecule biosynthetic process	http://amigo.geneontology.org/amigo/term/GO:0010557	ANIA_03269 ANIA_03290 ANIA_03986 ANIA_04123 ANIA_04821 ANIA_05431 ANIA_05609 ANIA_06569 ANIA_07592 ANIA_08092 ANIA_08164 ANIA_08355 ANIA_08431 ANIA_08774 ANIA_09458 ANIA_10423 ANIA_10600 ANIA_10775 ANIA_11197
0.0256126	44	1001	1.61054	Nucleobase-containing compound biosynthetic process	http://amigo.geneontology.org/amigo/term/GO:0034654	ANIA_00197 ANIA_01498 ANIA_01867 ANIA_02324 ANIA_02652 ANIA_03120 ANIA_03269 ANIA_03290 ANIA_03986 ANIA_04123 ANIA_04606 ANIA_04626 ANIA_04821 ANIA_05070 ANIA_05274 ANIA_05431 ANIA_05609 ANIA_05775 ANIA_06569 ANIA_06747 ANIA_07592 ANIA_07896 ANIA_08079 ANIA_08088 ANIA_08092 ANIA_08164 ANIA_08298 ANIA_08355 ANIA_08369 ANIA_08426 ANIA_08431 ANIA_08655 ANIA_08774 ANIA_08860 ANIA_08938 ANIA_09458 ANI…
0.0270521	4	17	8.50053	Iron ion transmembrane transport	http://amigo.geneontology.org/amigo/term/GO:0034755	ANIA_03763 ANIA_05378 ANIA_05397 ANIA_06845
0.0274851	19	318	2.20006	Positive regulation of RNA metabolic process	http://amigo.geneontology.org/amigo/term/GO:0051254	ANIA_03269 ANIA_03290 ANIA_03986 ANIA_04123 ANIA_04821 ANIA_05431 ANIA_05609 ANIA_06569 ANIA_07592 ANIA_08092 ANIA_08164 ANIA_08355 ANIA_08431 ANIA_08774 ANIA_09458 ANIA_10423 ANIA_10600 ANIA_10775 ANIA_11197
0.0286605	10	113	3.1971	Metal ion transport	http://amigo.geneontology.org/amigo/term/GO:0030001	ANIA_03763 ANIA_05187 ANIA_05378 ANIA_05397 ANIA_06115 ANIA_06845 ANIA_08337 ANIA_08540 ANIA_08941 ANIA_10235
0.0325413	48	1136	1.54555	Heterocycle biosynthetic process	http://amigo.geneontology.org/amigo/term/GO:0018130	ANIA_00197 ANIA_01035 ANIA_01498 ANIA_01867 ANIA_02324 ANIA_02652 ANIA_03120 ANIA_03269 ANIA_03290 ANIA_03986 ANIA_04123 ANIA_04371 ANIA_04606 ANIA_04626 ANIA_04821 ANIA_05070 ANIA_05274 ANIA_05431 ANIA_05609 ANIA_05775 ANIA_06569 ANIA_06747 ANIA_06775 ANIA_07592 ANIA_07896 ANIA_08079 ANIA_08088 ANIA_08092 ANIA_08164 ANIA_08298 ANIA_08355 ANIA_08369 ANIA_08426 ANIA_08431 ANIA_08655 ANIA_08774 ANI…
0.0325413	19	324	2.15855	Positive regulation of nucleobase-containing compound metabolic process	http://amigo.geneontology.org/amigo/term/GO:0045935	ANIA_03269 ANIA_03290 ANIA_03986 ANIA_04123 ANIA_04821 ANIA_05431 ANIA_05609 ANIA_06569 ANIA_07592 ANIA_08092 ANIA_08164 ANIA_08355 ANIA_08431 ANIA_08774 ANIA_09458 ANIA_10423 ANIA_10600 ANIA_10775 ANIA_11197
0.0409583	5	32	5.64489	Iron ion transport	http://amigo.geneontology.org/amigo/term/GO:0006826	ANIA_03763 ANIA_05378 ANIA_05397 ANIA_06845 ANIA_08540
0.0414825	47	1121	1.53386	Aromatic compound biosynthetic process	http://amigo.geneontology.org/amigo/term/GO:0019438	ANIA_00197 ANIA_01498 ANIA_01867 ANIA_02324 ANIA_02652 ANIA_03120 ANIA_03269 ANIA_03290 ANIA_03986 ANIA_04123 ANIA_04371 ANIA_04606 ANIA_04626 ANIA_04821 ANIA_05070 ANIA_05274 ANIA_05431 ANIA_05609 ANIA_05775 ANIA_06569 ANIA_06747 ANIA_07592 ANIA_07896 ANIA_08079 ANIA_08088 ANIA_08092 ANIA_08164 ANIA_08298 ANIA_08355 ANIA_08369 ANIA_08426 ANIA_08431 ANIA_08655 ANIA_08774 ANIA_08777 ANIA_08860 ANI…
0.0454492	14	214	2.42001	Transcription cis-regulatory region binding	http://amigo.geneontology.org/amigo/term/GO:0000976	ANIA_02652 ANIA_03269 ANIA_03986 ANIA_04123 ANIA_04821 ANIA_05070 ANIA_05609 ANIA_08088 ANIA_08164 ANIA_08355 ANIA_08369 ANIA_08431 ANIA_09458 ANIA_10423
0.0454492	14	214	2.42001	Transcription regulatory region nucleic acid binding	http://amigo.geneontology.org/amigo/term/GO:0001067	ANIA_02652 ANIA_03269 ANIA_03986 ANIA_04123 ANIA_04821 ANIA_05070 ANIA_05609 ANIA_08088 ANIA_08164 ANIA_08355 ANIA_08369 ANIA_08431 ANIA_09458 ANIA_10423
0.0457183	2	3	24.0848	Nitrate transport	http://amigo.geneontology.org/amigo/term/GO:0015706	ANIA_01008 ANIA_08647
0.0457183	2	3	24.0848	Nitrite transport	http://amigo.geneontology.org/amigo/term/GO:0015707	ANIA_01008 ANIA_08647
0.0457183	19	337	2.06752	Positive regulation of cellular biosynthetic process	http://amigo.geneontology.org/amigo/term/GO:0031328	ANIA_03269 ANIA_03290 ANIA_03986 ANIA_04123 ANIA_04821 ANIA_05431 ANIA_05609 ANIA_06569 ANIA_07592 ANIA_08092 ANIA_08164 ANIA_08355 ANIA_08431 ANIA_08774 ANIA_09458 ANIA_10423 ANIA_10600 ANIA_10775 ANIA_11197
0.0457183	11	148	2.75972	RNA polymerase II cis-regulatory region sequence-specific DNA binding	http://amigo.geneontology.org/amigo/term/GO:0000978	ANIA_03269 ANIA_03986 ANIA_04123 ANIA_04821 ANIA_05609 ANIA_08164 ANIA_08355 ANIA_08369 ANIA_08431 ANIA_09458 ANIA_10423
0.0457183	2	3	24.0848	Nitrate transmembrane transporter activity	http://amigo.geneontology.org/amigo/term/GO:0015112	ANIA_01008 ANIA_08647
0.0457183	2	3	24.0848	High-affinity secondary active nitrite transmembrane transporter activity	http://amigo.geneontology.org/amigo/term/GO:0015513	ANIA_01008 ANIA_08647
0.0457183	19	337	2.06752	Positive regulation of biosynthetic process	http://amigo.geneontology.org/amigo/term/GO:0009891	ANIA_03269 ANIA_03290 ANIA_03986 ANIA_04123 ANIA_04821 ANIA_05431 ANIA_05609 ANIA_06569 ANIA_07592 ANIA_08092 ANIA_08164 ANIA_08355 ANIA_08431 ANIA_08774 ANIA_09458 ANIA_10423 ANIA_10600 ANIA_10775 ANIA_11197
0.0498159	14	219	2.36347	Integral component of plasma membrane	http://amigo.geneontology.org/amigo/term/GO:0005887	ANIA_02560 ANIA_03214 ANIA_03763 ANIA_05378 ANIA_06115 ANIA_06238 ANIA_07972 ANIA_08365 ANIA_08540 ANIA_08647 ANIA_08941 ANIA_08983 ANIA_09316 ANIA_10235
NaCl vs. Untreated	A. nidulans	THS30	downregulated genes	DEG; log2FC<-1
Enrichment FDR	nGenes	Pathway Genes	Fold Enrichment	Pathway	URL	Genes
3.02804e-12	395	1990	1.39246	Heterocycle metabolic process	http://amigo.geneontology.org/amigo/term/GO:0046483	ANIA_00038 ANIA_00072 ANIA_00114 ANIA_00119 ANIA_00124 ANIA_00126 ANIA_00130 ANIA_00134 ANIA_00148 ANIA_00150 ANIA_00154 ANIA_00191 ANIA_00192 ANIA_00197 ANIA_00228 ANIA_00237 ANIA_00256 ANIA_00270 ANIA_00388 ANIA_00475 ANIA_00486 ANIA_00490 ANIA_00502 ANIA_00507 ANIA_00554 ANIA_00556 ANIA_00565 ANIA_00582 ANIA_00585 ANIA_00589 ANIA_00591 ANIA_00637 ANIA_00695 ANIA_00752 ANIA_00804 ANIA_00807 ANI…
3.02804e-12	373	1846	1.41923	Nucleobase-containing compound metabolic process	http://amigo.geneontology.org/amigo/term/GO:0006139	ANIA_00038 ANIA_00072 ANIA_00114 ANIA_00119 ANIA_00124 ANIA_00126 ANIA_00130 ANIA_00134 ANIA_00148 ANIA_00154 ANIA_00191 ANIA_00192 ANIA_00197 ANIA_00228 ANIA_00237 ANIA_00388 ANIA_00475 ANIA_00486 ANIA_00490 ANIA_00502 ANIA_00507 ANIA_00554 ANIA_00556 ANIA_00565 ANIA_00582 ANIA_00585 ANIA_00589 ANIA_00591 ANIA_00637 ANIA_00695 ANIA_00752 ANIA_00804 ANIA_00807 ANIA_00902 ANIA_00937 ANIA_00956 ANI…
3.02804e-12	106	352	2.09749	Host cellular component	http://amigo.geneontology.org/amigo/term/GO:0018995	ANIA_00148 ANIA_00197 ANIA_00388 ANIA_00507 ANIA_00585 ANIA_00752 ANIA_00902 ANIA_00937 ANIA_01077 ANIA_01134 ANIA_01303 ANIA_01729 ANIA_01893 ANIA_02036 ANIA_02324 ANIA_02650 ANIA_02667 ANIA_02765 ANIA_02780 ANIA_02782 ANIA_02826 ANIA_03120 ANIA_03217 ANIA_03269 ANIA_03290 ANIA_03385 ANIA_03420 ANIA_03502 ANIA_03637 ANIA_03868 ANIA_03900 ANIA_03986 ANIA_04123 ANIA_04489 ANIA_04606 ANIA_04626 ANI…
3.02804e-12	106	352	2.09749	Host cell part	http://amigo.geneontology.org/amigo/term/GO:0033643	ANIA_00148 ANIA_00197 ANIA_00388 ANIA_00507 ANIA_00585 ANIA_00752 ANIA_00902 ANIA_00937 ANIA_01077 ANIA_01134 ANIA_01303 ANIA_01729 ANIA_01893 ANIA_02036 ANIA_02324 ANIA_02650 ANIA_02667 ANIA_02765 ANIA_02780 ANIA_02782 ANIA_02826 ANIA_03120 ANIA_03217 ANIA_03269 ANIA_03290 ANIA_03385 ANIA_03420 ANIA_03502 ANIA_03637 ANIA_03868 ANIA_03900 ANIA_03986 ANIA_04123 ANIA_04489 ANIA_04606 ANIA_04626 ANI…
3.02804e-12	106	352	2.09749	Host intracellular part	http://amigo.geneontology.org/amigo/term/GO:0033646	ANIA_00148 ANIA_00197 ANIA_00388 ANIA_00507 ANIA_00585 ANIA_00752 ANIA_00902 ANIA_00937 ANIA_01077 ANIA_01134 ANIA_01303 ANIA_01729 ANIA_01893 ANIA_02036 ANIA_02324 ANIA_02650 ANIA_02667 ANIA_02765 ANIA_02780 ANIA_02782 ANIA_02826 ANIA_03120 ANIA_03217 ANIA_03269 ANIA_03290 ANIA_03385 ANIA_03420 ANIA_03502 ANIA_03637 ANIA_03868 ANIA_03900 ANIA_03986 ANIA_04123 ANIA_04489 ANIA_04606 ANIA_04626 ANI…
3.02804e-12	106	351	2.10352	Host intracellular organelle	http://amigo.geneontology.org/amigo/term/GO:0033647	ANIA_00148 ANIA_00197 ANIA_00388 ANIA_00507 ANIA_00585 ANIA_00752 ANIA_00902 ANIA_00937 ANIA_01077 ANIA_01134 ANIA_01303 ANIA_01729 ANIA_01893 ANIA_02036 ANIA_02324 ANIA_02650 ANIA_02667 ANIA_02765 ANIA_02780 ANIA_02782 ANIA_02826 ANIA_03120 ANIA_03217 ANIA_03269 ANIA_03290 ANIA_03385 ANIA_03420 ANIA_03502 ANIA_03637 ANIA_03868 ANIA_03900 ANIA_03986 ANIA_04123 ANIA_04489 ANIA_04606 ANIA_04626 ANI…
3.02804e-12	106	351	2.10352	Host intracellular membrane-bounded organelle	http://amigo.geneontology.org/amigo/term/GO:0033648	ANIA_00148 ANIA_00197 ANIA_00388 ANIA_00507 ANIA_00585 ANIA_00752 ANIA_00902 ANIA_00937 ANIA_01077 ANIA_01134 ANIA_01303 ANIA_01729 ANIA_01893 ANIA_02036 ANIA_02324 ANIA_02650 ANIA_02667 ANIA_02765 ANIA_02780 ANIA_02782 ANIA_02826 ANIA_03120 ANIA_03217 ANIA_03269 ANIA_03290 ANIA_03385 ANIA_03420 ANIA_03502 ANIA_03637 ANIA_03868 ANIA_03900 ANIA_03986 ANIA_04123 ANIA_04489 ANIA_04606 ANIA_04626 ANI…
3.02804e-12	106	351	2.10352	Host cell nucleus	http://amigo.geneontology.org/amigo/term/GO:0042025	ANIA_00148 ANIA_00197 ANIA_00388 ANIA_00507 ANIA_00585 ANIA_00752 ANIA_00902 ANIA_00937 ANIA_01077 ANIA_01134 ANIA_01303 ANIA_01729 ANIA_01893 ANIA_02036 ANIA_02324 ANIA_02650 ANIA_02667 ANIA_02765 ANIA_02780 ANIA_02782 ANIA_02826 ANIA_03120 ANIA_03217 ANIA_03269 ANIA_03290 ANIA_03385 ANIA_03420 ANIA_03502 ANIA_03637 ANIA_03868 ANIA_03900 ANIA_03986 ANIA_04123 ANIA_04489 ANIA_04606 ANIA_04626 ANI…
3.02804e-12	106	352	2.09749	Host intracellular region	http://amigo.geneontology.org/amigo/term/GO:0043656	ANIA_00148 ANIA_00197 ANIA_00388 ANIA_00507 ANIA_00585 ANIA_00752 ANIA_00902 ANIA_00937 ANIA_01077 ANIA_01134 ANIA_01303 ANIA_01729 ANIA_01893 ANIA_02036 ANIA_02324 ANIA_02650 ANIA_02667 ANIA_02765 ANIA_02780 ANIA_02782 ANIA_02826 ANIA_03120 ANIA_03217 ANIA_03269 ANIA_03290 ANIA_03385 ANIA_03420 ANIA_03502 ANIA_03637 ANIA_03868 ANIA_03900 ANIA_03986 ANIA_04123 ANIA_04489 ANIA_04606 ANIA_04626 ANI…
3.02804e-12	106	352	2.09749	Host cell	http://amigo.geneontology.org/amigo/term/GO:0043657	ANIA_00148 ANIA_00197 ANIA_00388 ANIA_00507 ANIA_00585 ANIA_00752 ANIA_00902 ANIA_00937 ANIA_01077 ANIA_01134 ANIA_01303 ANIA_01729 ANIA_01893 ANIA_02036 ANIA_02324 ANIA_02650 ANIA_02667 ANIA_02765 ANIA_02780 ANIA_02782 ANIA_02826 ANIA_03120 ANIA_03217 ANIA_03269 ANIA_03290 ANIA_03385 ANIA_03420 ANIA_03502 ANIA_03637 ANIA_03868 ANIA_03900 ANIA_03986 ANIA_04123 ANIA_04489 ANIA_04606 ANIA_04626 ANI…
2.56252e-11	323	1575	1.43817	Nucleic acid metabolic process	http://amigo.geneontology.org/amigo/term/GO:0090304	ANIA_00038 ANIA_00072 ANIA_00114 ANIA_00119 ANIA_00124 ANIA_00126 ANIA_00130 ANIA_00134 ANIA_00148 ANIA_00154 ANIA_00191 ANIA_00192 ANIA_00197 ANIA_00228 ANIA_00237 ANIA_00388 ANIA_00475 ANIA_00486 ANIA_00502 ANIA_00507 ANIA_00554 ANIA_00556 ANIA_00582 ANIA_00585 ANIA_00589 ANIA_00637 ANIA_00695 ANIA_00752 ANIA_00804 ANIA_00807 ANIA_00902 ANIA_00937 ANIA_00956 ANIA_01077 ANIA_01134 ANIA_01164 ANI…
2.76095e-11	137	523	1.84067	Zinc ion binding	http://amigo.geneontology.org/amigo/term/GO:0008270	ANIA_00148 ANIA_00197 ANIA_00388 ANIA_00443 ANIA_00486 ANIA_00507 ANIA_00585 ANIA_00797 ANIA_00902 ANIA_00937 ANIA_01077 ANIA_01134 ANIA_01303 ANIA_01403 ANIA_01729 ANIA_01888 ANIA_01893 ANIA_01944 ANIA_02036 ANIA_02195 ANIA_02324 ANIA_02334 ANIA_02650 ANIA_02666 ANIA_02667 ANIA_02780 ANIA_02782 ANIA_02826 ANIA_03067 ANIA_03120 ANIA_03137 ANIA_03217 ANIA_03269 ANIA_03290 ANIA_03385 ANIA_03420 ANI…
6.02492e-11	115	415	1.94175	DNA-binding transcription factor activity, RNA polymerase II-specific	http://amigo.geneontology.org/amigo/term/GO:0000981	ANIA_00148 ANIA_00197 ANIA_00388 ANIA_00486 ANIA_00507 ANIA_00585 ANIA_00902 ANIA_00937 ANIA_01077 ANIA_01134 ANIA_01265 ANIA_01303 ANIA_01729 ANIA_01893 ANIA_02009 ANIA_02036 ANIA_02324 ANIA_02650 ANIA_02652 ANIA_02667 ANIA_02780 ANIA_02782 ANIA_02826 ANIA_03120 ANIA_03217 ANIA_03269 ANIA_03290 ANIA_03385 ANIA_03420 ANIA_03502 ANIA_03637 ANIA_03868 ANIA_03900 ANIA_03986 ANIA_04013 ANIA_04035 ANI…
6.32648e-10	121	461	1.84462	DNA-binding transcription factor activity	http://amigo.geneontology.org/amigo/term/GO:0003700	ANIA_00148 ANIA_00197 ANIA_00388 ANIA_00486 ANIA_00507 ANIA_00585 ANIA_00902 ANIA_00937 ANIA_01077 ANIA_01134 ANIA_01156 ANIA_01265 ANIA_01303 ANIA_01729 ANIA_01893 ANIA_02009 ANIA_02036 ANIA_02324 ANIA_02650 ANIA_02652 ANIA_02667 ANIA_02780 ANIA_02782 ANIA_02826 ANIA_03120 ANIA_03217 ANIA_03269 ANIA_03290 ANIA_03385 ANIA_03420 ANIA_03502 ANIA_03578 ANIA_03637 ANIA_03868 ANIA_03900 ANIA_03986 ANI…
2.55301e-09	275	1340	1.43764	RNA metabolic process	http://amigo.geneontology.org/amigo/term/GO:0016070	ANIA_00072 ANIA_00114 ANIA_00119 ANIA_00124 ANIA_00130 ANIA_00134 ANIA_00148 ANIA_00154 ANIA_00191 ANIA_00192 ANIA_00197 ANIA_00237 ANIA_00388 ANIA_00475 ANIA_00486 ANIA_00502 ANIA_00507 ANIA_00554 ANIA_00585 ANIA_00589 ANIA_00637 ANIA_00695 ANIA_00752 ANIA_00804 ANIA_00807 ANIA_00902 ANIA_00937 ANIA_00956 ANIA_01077 ANIA_01134 ANIA_01164 ANIA_01201 ANIA_01205 ANIA_01227 ANIA_01265 ANIA_01296 ANI…
2.67371e-09	180	791	1.59776	DNA binding	http://amigo.geneontology.org/amigo/term/GO:0003677	ANIA_00126 ANIA_00148 ANIA_00197 ANIA_00228 ANIA_00388 ANIA_00486 ANIA_00507 ANIA_00582 ANIA_00585 ANIA_00752 ANIA_00902 ANIA_00937 ANIA_01077 ANIA_01134 ANIA_01265 ANIA_01303 ANIA_01435 ANIA_01479 ANIA_01690 ANIA_01708 ANIA_01729 ANIA_01843 ANIA_01893 ANIA_01929 ANIA_01956 ANIA_02009 ANIA_02036 ANIA_02324 ANIA_02491 ANIA_02637 ANIA_02650 ANIA_02652 ANIA_02667 ANIA_02747 ANIA_02765 ANIA_02780 ANI…
4.00479e-09	382	1997	1.33504	Nucleus	http://amigo.geneontology.org/amigo/term/GO:0005634	ANIA_00038 ANIA_00119 ANIA_00120 ANIA_00124 ANIA_00126 ANIA_00134 ANIA_00148 ANIA_00154 ANIA_00191 ANIA_00192 ANIA_00197 ANIA_00228 ANIA_00237 ANIA_00270 ANIA_00310 ANIA_00388 ANIA_00475 ANIA_00486 ANIA_00507 ANIA_00554 ANIA_00556 ANIA_00576 ANIA_00578 ANIA_00582 ANIA_00585 ANIA_00589 ANIA_00637 ANIA_00695 ANIA_00699 ANIA_00752 ANIA_00807 ANIA_00814 ANIA_00822 ANIA_00844 ANIA_00865 ANIA_00883 ANI…
5.96112e-09	181	803	1.57824	Transcription, DNA-templated	http://amigo.geneontology.org/amigo/term/GO:0006351	ANIA_00134 ANIA_00148 ANIA_00154 ANIA_00191 ANIA_00192 ANIA_00197 ANIA_00388 ANIA_00486 ANIA_00507 ANIA_00554 ANIA_00585 ANIA_00752 ANIA_00807 ANIA_00902 ANIA_00937 ANIA_01077 ANIA_01134 ANIA_01205 ANIA_01227 ANIA_01265 ANIA_01303 ANIA_01369 ANIA_01690 ANIA_01729 ANIA_01867 ANIA_01893 ANIA_01929 ANIA_01976 ANIA_02009 ANIA_02036 ANIA_02324 ANIA_02513 ANIA_02650 ANIA_02652 ANIA_02667 ANIA_02747 ANI…
5.96112e-09	170	741	1.60602	Regulation of transcription, DNA-templated	http://amigo.geneontology.org/amigo/term/GO:0006355	ANIA_00134 ANIA_00148 ANIA_00154 ANIA_00191 ANIA_00197 ANIA_00388 ANIA_00486 ANIA_00507 ANIA_00554 ANIA_00585 ANIA_00807 ANIA_00902 ANIA_00937 ANIA_01077 ANIA_01134 ANIA_01205 ANIA_01227 ANIA_01265 ANIA_01303 ANIA_01369 ANIA_01690 ANIA_01729 ANIA_01867 ANIA_01893 ANIA_01929 ANIA_01976 ANIA_02009 ANIA_02036 ANIA_02324 ANIA_02513 ANIA_02650 ANIA_02652 ANIA_02667 ANIA_02765 ANIA_02780 ANIA_02782 ANI…
6.17117e-09	182	810	1.57305	RNA biosynthetic process	http://amigo.geneontology.org/amigo/term/GO:0032774	ANIA_00134 ANIA_00148 ANIA_00154 ANIA_00191 ANIA_00192 ANIA_00197 ANIA_00388 ANIA_00486 ANIA_00507 ANIA_00554 ANIA_00585 ANIA_00752 ANIA_00807 ANIA_00902 ANIA_00937 ANIA_01077 ANIA_01134 ANIA_01205 ANIA_01227 ANIA_01265 ANIA_01303 ANIA_01369 ANIA_01690 ANIA_01729 ANIA_01867 ANIA_01893 ANIA_01929 ANIA_01976 ANIA_02009 ANIA_02036 ANIA_02324 ANIA_02513 ANIA_02650 ANIA_02652 ANIA_02667 ANIA_02747 ANI…
6.17117e-09	181	805	1.57426	Nucleic acid-templated transcription	http://amigo.geneontology.org/amigo/term/GO:0097659	ANIA_00134 ANIA_00148 ANIA_00154 ANIA_00191 ANIA_00192 ANIA_00197 ANIA_00388 ANIA_00486 ANIA_00507 ANIA_00554 ANIA_00585 ANIA_00752 ANIA_00807 ANIA_00902 ANIA_00937 ANIA_01077 ANIA_01134 ANIA_01205 ANIA_01227 ANIA_01265 ANIA_01303 ANIA_01369 ANIA_01690 ANIA_01729 ANIA_01867 ANIA_01893 ANIA_01929 ANIA_01976 ANIA_02009 ANIA_02036 ANIA_02324 ANIA_02513 ANIA_02650 ANIA_02652 ANIA_02667 ANIA_02747 ANI…
6.17117e-09	170	743	1.60164	Regulation of nucleic acid-templated transcription	http://amigo.geneontology.org/amigo/term/GO:1903506	ANIA_00134 ANIA_00148 ANIA_00154 ANIA_00191 ANIA_00197 ANIA_00388 ANIA_00486 ANIA_00507 ANIA_00554 ANIA_00585 ANIA_00807 ANIA_00902 ANIA_00937 ANIA_01077 ANIA_01134 ANIA_01205 ANIA_01227 ANIA_01265 ANIA_01303 ANIA_01369 ANIA_01690 ANIA_01729 ANIA_01867 ANIA_01893 ANIA_01929 ANIA_01976 ANIA_02009 ANIA_02036 ANIA_02324 ANIA_02513 ANIA_02650 ANIA_02652 ANIA_02667 ANIA_02765 ANIA_02780 ANIA_02782 ANI…
6.17117e-09	170	743	1.60164	Regulation of RNA biosynthetic process	http://amigo.geneontology.org/amigo/term/GO:2001141	ANIA_00134 ANIA_00148 ANIA_00154 ANIA_00191 ANIA_00197 ANIA_00388 ANIA_00486 ANIA_00507 ANIA_00554 ANIA_00585 ANIA_00807 ANIA_00902 ANIA_00937 ANIA_01077 ANIA_01134 ANIA_01205 ANIA_01227 ANIA_01265 ANIA_01303 ANIA_01369 ANIA_01690 ANIA_01729 ANIA_01867 ANIA_01893 ANIA_01929 ANIA_01976 ANIA_02009 ANIA_02036 ANIA_02324 ANIA_02513 ANIA_02650 ANIA_02652 ANIA_02667 ANIA_02765 ANIA_02780 ANIA_02782 ANI…
6.95825e-09	215	1001	1.5028	Nucleobase-containing compound biosynthetic process	http://amigo.geneontology.org/amigo/term/GO:0034654	ANIA_00134 ANIA_00148 ANIA_00154 ANIA_00191 ANIA_00192 ANIA_00197 ANIA_00388 ANIA_00486 ANIA_00490 ANIA_00507 ANIA_00554 ANIA_00565 ANIA_00585 ANIA_00591 ANIA_00752 ANIA_00807 ANIA_00902 ANIA_00937 ANIA_01077 ANIA_01134 ANIA_01205 ANIA_01227 ANIA_01265 ANIA_01271 ANIA_01303 ANIA_01369 ANIA_01498 ANIA_01690 ANIA_01729 ANIA_01867 ANIA_01893 ANIA_01911 ANIA_01929 ANIA_01965 ANIA_01976 ANIA_02009 ANI…
6.95825e-09	169	738	1.60095	Transition metal ion binding	http://amigo.geneontology.org/amigo/term/GO:0046914	ANIA_00042 ANIA_00148 ANIA_00197 ANIA_00338 ANIA_00388 ANIA_00443 ANIA_00486 ANIA_00507 ANIA_00556 ANIA_00585 ANIA_00640 ANIA_00797 ANIA_00901 ANIA_00902 ANIA_00937 ANIA_01006 ANIA_01077 ANIA_01087 ANIA_01134 ANIA_01301 ANIA_01303 ANIA_01403 ANIA_01729 ANIA_01888 ANIA_01893 ANIA_01901 ANIA_01944 ANIA_01967 ANIA_02036 ANIA_02040 ANIA_02195 ANIA_02324 ANIA_02334 ANIA_02650 ANIA_02666 ANIA_02667 ANI…
1.60865e-08	207	962	1.50317	Regulation of nitrogen compound metabolic process	http://amigo.geneontology.org/amigo/term/GO:0051171	ANIA_00134 ANIA_00148 ANIA_00154 ANIA_00191 ANIA_00197 ANIA_00256 ANIA_00388 ANIA_00486 ANIA_00507 ANIA_00554 ANIA_00565 ANIA_00585 ANIA_00807 ANIA_00814 ANIA_00902 ANIA_00937 ANIA_01077 ANIA_01134 ANIA_01205 ANIA_01227 ANIA_01265 ANIA_01303 ANIA_01369 ANIA_01690 ANIA_01708 ANIA_01729 ANIA_01867 ANIA_01893 ANIA_01929 ANIA_01976 ANIA_02009 ANIA_02036 ANIA_02246 ANIA_02324 ANIA_02482 ANIA_02513 ANI…
1.80775e-08	128	524	1.71309	Transcription regulator activity	http://amigo.geneontology.org/amigo/term/GO:0140110	ANIA_00148 ANIA_00197 ANIA_00388 ANIA_00486 ANIA_00507 ANIA_00585 ANIA_00902 ANIA_00937 ANIA_01077 ANIA_01134 ANIA_01156 ANIA_01227 ANIA_01265 ANIA_01303 ANIA_01729 ANIA_01893 ANIA_02009 ANIA_02036 ANIA_02324 ANIA_02650 ANIA_02652 ANIA_02667 ANIA_02780 ANIA_02782 ANIA_02826 ANIA_03120 ANIA_03217 ANIA_03269 ANIA_03290 ANIA_03385 ANIA_03420 ANIA_03502 ANIA_03578 ANIA_03637 ANIA_03868 ANIA_03900 ANI…
2.43388e-08	226	1078	1.4641	Regulation of metabolic process	http://amigo.geneontology.org/amigo/term/GO:0019222	ANIA_00119 ANIA_00120 ANIA_00134 ANIA_00148 ANIA_00154 ANIA_00191 ANIA_00197 ANIA_00256 ANIA_00388 ANIA_00439 ANIA_00486 ANIA_00507 ANIA_00554 ANIA_00565 ANIA_00585 ANIA_00807 ANIA_00814 ANIA_00902 ANIA_00937 ANIA_01077 ANIA_01134 ANIA_01205 ANIA_01227 ANIA_01265 ANIA_01303 ANIA_01369 ANIA_01690 ANIA_01708 ANIA_01729 ANIA_01867 ANIA_01893 ANIA_01929 ANIA_01976 ANIA_02009 ANIA_02036 ANIA_02153 ANI…
2.43388e-08	212	996	1.48634	Regulation of cellular metabolic process	http://amigo.geneontology.org/amigo/term/GO:0031323	ANIA_00120 ANIA_00134 ANIA_00148 ANIA_00154 ANIA_00191 ANIA_00197 ANIA_00256 ANIA_00388 ANIA_00439 ANIA_00486 ANIA_00507 ANIA_00554 ANIA_00565 ANIA_00585 ANIA_00807 ANIA_00814 ANIA_00902 ANIA_00937 ANIA_01077 ANIA_01134 ANIA_01205 ANIA_01227 ANIA_01265 ANIA_01303 ANIA_01369 ANIA_01690 ANIA_01708 ANIA_01729 ANIA_01867 ANIA_01893 ANIA_01929 ANIA_01976 ANIA_02009 ANIA_02036 ANIA_02160 ANIA_02246 ANI…
2.63261e-08	233	1121	1.45223	Aromatic compound biosynthetic process	http://amigo.geneontology.org/amigo/term/GO:0019438	ANIA_00050 ANIA_00134 ANIA_00148 ANIA_00149 ANIA_00150 ANIA_00154 ANIA_00191 ANIA_00192 ANIA_00197 ANIA_00270 ANIA_00388 ANIA_00486 ANIA_00490 ANIA_00507 ANIA_00554 ANIA_00565 ANIA_00585 ANIA_00591 ANIA_00752 ANIA_00807 ANIA_00902 ANIA_00937 ANIA_01077 ANIA_01134 ANIA_01135 ANIA_01137 ANIA_01205 ANIA_01227 ANIA_01265 ANIA_01271 ANIA_01303 ANIA_01369 ANIA_01403 ANIA_01498 ANIA_01690 ANIA_01729 ANI…
2.8307e-08	198	919	1.50757	Regulation of gene expression	http://amigo.geneontology.org/amigo/term/GO:0010468	ANIA_00119 ANIA_00134 ANIA_00148 ANIA_00154 ANIA_00191 ANIA_00197 ANIA_00388 ANIA_00486 ANIA_00507 ANIA_00554 ANIA_00585 ANIA_00807 ANIA_00902 ANIA_00937 ANIA_01077 ANIA_01134 ANIA_01205 ANIA_01227 ANIA_01265 ANIA_01303 ANIA_01369 ANIA_01690 ANIA_01729 ANIA_01867 ANIA_01893 ANIA_01929 ANIA_01976 ANIA_02009 ANIA_02036 ANIA_02153 ANIA_02246 ANIA_02252 ANIA_02324 ANIA_02482 ANIA_02513 ANIA_02650 ANI…
3.00943e-08	235	1136	1.44513	Heterocycle biosynthetic process	http://amigo.geneontology.org/amigo/term/GO:0018130	ANIA_00134 ANIA_00148 ANIA_00150 ANIA_00154 ANIA_00191 ANIA_00192 ANIA_00197 ANIA_00256 ANIA_00270 ANIA_00388 ANIA_00486 ANIA_00490 ANIA_00507 ANIA_00554 ANIA_00565 ANIA_00585 ANIA_00591 ANIA_00752 ANIA_00807 ANIA_00836 ANIA_00902 ANIA_00937 ANIA_01033 ANIA_01035 ANIA_01077 ANIA_01134 ANIA_01205 ANIA_01227 ANIA_01265 ANIA_01271 ANIA_01303 ANIA_01369 ANIA_01403 ANIA_01498 ANIA_01690 ANIA_01729 ANI…
3.00943e-08	179	812	1.54326	Regulation of nucleobase-containing compound metabolic process	http://amigo.geneontology.org/amigo/term/GO:0019219	ANIA_00134 ANIA_00148 ANIA_00154 ANIA_00191 ANIA_00197 ANIA_00388 ANIA_00486 ANIA_00507 ANIA_00554 ANIA_00565 ANIA_00585 ANIA_00807 ANIA_00902 ANIA_00937 ANIA_01077 ANIA_01134 ANIA_01205 ANIA_01227 ANIA_01265 ANIA_01303 ANIA_01369 ANIA_01690 ANIA_01708 ANIA_01729 ANIA_01867 ANIA_01893 ANIA_01929 ANIA_01976 ANIA_02009 ANIA_02036 ANIA_02324 ANIA_02513 ANIA_02650 ANIA_02652 ANIA_02667 ANIA_02765 ANI…
3.00943e-08	176	795	1.5503	Regulation of RNA metabolic process	http://amigo.geneontology.org/amigo/term/GO:0051252	ANIA_00134 ANIA_00148 ANIA_00154 ANIA_00191 ANIA_00197 ANIA_00388 ANIA_00486 ANIA_00507 ANIA_00554 ANIA_00585 ANIA_00807 ANIA_00902 ANIA_00937 ANIA_01077 ANIA_01134 ANIA_01205 ANIA_01227 ANIA_01265 ANIA_01303 ANIA_01369 ANIA_01690 ANIA_01729 ANIA_01867 ANIA_01893 ANIA_01929 ANIA_01976 ANIA_02009 ANIA_02036 ANIA_02324 ANIA_02513 ANIA_02650 ANIA_02652 ANIA_02667 ANIA_02765 ANIA_02780 ANIA_02782 ANI…
3.00943e-08	218	1036	1.4702	Regulation of macromolecule metabolic process	http://amigo.geneontology.org/amigo/term/GO:0060255	ANIA_00119 ANIA_00134 ANIA_00148 ANIA_00154 ANIA_00191 ANIA_00197 ANIA_00388 ANIA_00486 ANIA_00507 ANIA_00554 ANIA_00585 ANIA_00807 ANIA_00814 ANIA_00902 ANIA_00937 ANIA_01077 ANIA_01134 ANIA_01205 ANIA_01227 ANIA_01265 ANIA_01303 ANIA_01369 ANIA_01690 ANIA_01708 ANIA_01729 ANIA_01867 ANIA_01893 ANIA_01929 ANIA_01976 ANIA_02009 ANIA_02036 ANIA_02153 ANIA_02160 ANIA_02246 ANIA_02252 ANIA_02324 ANI…
3.00943e-08	142	604	1.64261	Regulation of transcription by RNA polymerase II	http://amigo.geneontology.org/amigo/term/GO:0006357	ANIA_00148 ANIA_00191 ANIA_00197 ANIA_00388 ANIA_00486 ANIA_00507 ANIA_00585 ANIA_00902 ANIA_00937 ANIA_01077 ANIA_01134 ANIA_01265 ANIA_01303 ANIA_01369 ANIA_01729 ANIA_01867 ANIA_01893 ANIA_01929 ANIA_01976 ANIA_02009 ANIA_02036 ANIA_02324 ANIA_02650 ANIA_02652 ANIA_02667 ANIA_02780 ANIA_02782 ANIA_02826 ANIA_02955 ANIA_03120 ANIA_03217 ANIA_03269 ANIA_03290 ANIA_03385 ANIA_03420 ANIA_03502 ANI…
3.95142e-08	249	1222	1.4223	Organic cyclic compound biosynthetic process	http://amigo.geneontology.org/amigo/term/GO:1901362	ANIA_00050 ANIA_00134 ANIA_00148 ANIA_00149 ANIA_00150 ANIA_00154 ANIA_00191 ANIA_00192 ANIA_00197 ANIA_00256 ANIA_00270 ANIA_00388 ANIA_00486 ANIA_00490 ANIA_00507 ANIA_00554 ANIA_00565 ANIA_00585 ANIA_00591 ANIA_00752 ANIA_00807 ANIA_00836 ANIA_00902 ANIA_00937 ANIA_01033 ANIA_01035 ANIA_01077 ANIA_01134 ANIA_01135 ANIA_01137 ANIA_01205 ANIA_01227 ANIA_01265 ANIA_01271 ANIA_01303 ANIA_01369 ANI…
6.33913e-08	182	837	1.52164	Regulation of cellular macromolecule biosynthetic process	http://amigo.geneontology.org/amigo/term/GO:2000112	ANIA_00134 ANIA_00148 ANIA_00154 ANIA_00191 ANIA_00197 ANIA_00388 ANIA_00486 ANIA_00507 ANIA_00554 ANIA_00585 ANIA_00807 ANIA_00902 ANIA_00937 ANIA_01077 ANIA_01134 ANIA_01205 ANIA_01227 ANIA_01265 ANIA_01303 ANIA_01369 ANIA_01690 ANIA_01729 ANIA_01867 ANIA_01893 ANIA_01929 ANIA_01976 ANIA_02009 ANIA_02036 ANIA_02160 ANIA_02246 ANIA_02324 ANIA_02482 ANIA_02513 ANIA_02650 ANIA_02652 ANIA_02667 ANI…
8.86033e-08	187	869	1.50513	Regulation of biosynthetic process	http://amigo.geneontology.org/amigo/term/GO:0009889	ANIA_00134 ANIA_00148 ANIA_00154 ANIA_00191 ANIA_00197 ANIA_00256 ANIA_00388 ANIA_00486 ANIA_00507 ANIA_00554 ANIA_00585 ANIA_00807 ANIA_00902 ANIA_00937 ANIA_01077 ANIA_01134 ANIA_01205 ANIA_01227 ANIA_01265 ANIA_01303 ANIA_01369 ANIA_01690 ANIA_01729 ANIA_01867 ANIA_01893 ANIA_01929 ANIA_01976 ANIA_02009 ANIA_02036 ANIA_02160 ANIA_02246 ANIA_02324 ANIA_02482 ANIA_02513 ANIA_02650 ANIA_02652 ANI…
1.00009e-07	182	842	1.51248	Regulation of macromolecule biosynthetic process	http://amigo.geneontology.org/amigo/term/GO:0010556	ANIA_00134 ANIA_00148 ANIA_00154 ANIA_00191 ANIA_00197 ANIA_00388 ANIA_00486 ANIA_00507 ANIA_00554 ANIA_00585 ANIA_00807 ANIA_00902 ANIA_00937 ANIA_01077 ANIA_01134 ANIA_01205 ANIA_01227 ANIA_01265 ANIA_01303 ANIA_01369 ANIA_01690 ANIA_01729 ANIA_01867 ANIA_01893 ANIA_01929 ANIA_01976 ANIA_02009 ANIA_02036 ANIA_02160 ANIA_02246 ANIA_02324 ANIA_02482 ANIA_02513 ANIA_02650 ANIA_02652 ANIA_02667 ANI…
1.05921e-07	204	969	1.47056	Regulation of primary metabolic process	http://amigo.geneontology.org/amigo/term/GO:0080090	ANIA_00134 ANIA_00148 ANIA_00154 ANIA_00191 ANIA_00197 ANIA_00388 ANIA_00486 ANIA_00507 ANIA_00554 ANIA_00565 ANIA_00585 ANIA_00807 ANIA_00814 ANIA_00902 ANIA_00937 ANIA_01077 ANIA_01134 ANIA_01205 ANIA_01227 ANIA_01265 ANIA_01303 ANIA_01369 ANIA_01690 ANIA_01708 ANIA_01729 ANIA_01867 ANIA_01893 ANIA_01929 ANIA_01976 ANIA_02009 ANIA_02036 ANIA_02246 ANIA_02324 ANIA_02482 ANIA_02513 ANIA_02650 ANI…
1.3202e-07	145	634	1.59705	Transcription by RNA polymerase II	http://amigo.geneontology.org/amigo/term/GO:0006366	ANIA_00148 ANIA_00191 ANIA_00192 ANIA_00197 ANIA_00388 ANIA_00486 ANIA_00507 ANIA_00585 ANIA_00752 ANIA_00902 ANIA_00937 ANIA_01077 ANIA_01134 ANIA_01265 ANIA_01303 ANIA_01369 ANIA_01729 ANIA_01867 ANIA_01893 ANIA_01929 ANIA_01976 ANIA_02009 ANIA_02036 ANIA_02324 ANIA_02650 ANIA_02652 ANIA_02667 ANIA_02771 ANIA_02780 ANIA_02782 ANIA_02826 ANIA_02955 ANIA_03120 ANIA_03217 ANIA_03269 ANIA_03290 ANI…
1.51282e-07	185	864	1.49776	Regulation of cellular biosynthetic process	http://amigo.geneontology.org/amigo/term/GO:0031326	ANIA_00134 ANIA_00148 ANIA_00154 ANIA_00191 ANIA_00197 ANIA_00256 ANIA_00388 ANIA_00486 ANIA_00507 ANIA_00554 ANIA_00585 ANIA_00807 ANIA_00902 ANIA_00937 ANIA_01077 ANIA_01134 ANIA_01205 ANIA_01227 ANIA_01265 ANIA_01303 ANIA_01369 ANIA_01690 ANIA_01729 ANIA_01867 ANIA_01893 ANIA_01929 ANIA_01976 ANIA_02009 ANIA_02036 ANIA_02160 ANIA_02246 ANIA_02324 ANIA_02482 ANIA_02513 ANIA_02650 ANIA_02652 ANI…
1.64604e-07	273	1386	1.37413	Regulation of cellular process	http://amigo.geneontology.org/amigo/term/GO:0050794	ANIA_00038 ANIA_00120 ANIA_00124 ANIA_00134 ANIA_00148 ANIA_00154 ANIA_00191 ANIA_00197 ANIA_00256 ANIA_00388 ANIA_00439 ANIA_00463 ANIA_00486 ANIA_00507 ANIA_00554 ANIA_00556 ANIA_00565 ANIA_00575 ANIA_00585 ANIA_00699 ANIA_00807 ANIA_00814 ANIA_00822 ANIA_00902 ANIA_00905 ANIA_00937 ANIA_01025 ANIA_01077 ANIA_01134 ANIA_01205 ANIA_01227 ANIA_01265 ANIA_01303 ANIA_01306 ANIA_01369 ANIA_01661 ANI…
1.77965e-07	287	1473	1.35939	Regulation of biological process	http://amigo.geneontology.org/amigo/term/GO:0050789	ANIA_00038 ANIA_00119 ANIA_00120 ANIA_00124 ANIA_00134 ANIA_00148 ANIA_00154 ANIA_00191 ANIA_00197 ANIA_00256 ANIA_00388 ANIA_00439 ANIA_00463 ANIA_00486 ANIA_00507 ANIA_00554 ANIA_00556 ANIA_00565 ANIA_00575 ANIA_00585 ANIA_00699 ANIA_00807 ANIA_00814 ANIA_00822 ANIA_00902 ANIA_00905 ANIA_00937 ANIA_01025 ANIA_01077 ANIA_01134 ANIA_01205 ANIA_01227 ANIA_01265 ANIA_01303 ANIA_01306 ANIA_01369 ANI…
4.3658e-07	89	346	1.81305	Sequence-specific DNA binding	http://amigo.geneontology.org/amigo/term/GO:0043565	ANIA_00148 ANIA_00197 ANIA_00228 ANIA_00388 ANIA_00486 ANIA_00585 ANIA_00937 ANIA_01134 ANIA_01265 ANIA_01435 ANIA_01929 ANIA_02009 ANIA_02036 ANIA_02324 ANIA_02491 ANIA_02650 ANIA_02652 ANIA_02780 ANIA_02826 ANIA_02955 ANIA_03217 ANIA_03269 ANIA_03385 ANIA_03502 ANIA_03637 ANIA_03667 ANIA_03944 ANIA_03986 ANIA_04001 ANIA_04013 ANIA_04123 ANIA_04720 ANIA_04750 ANIA_04821 ANIA_05052 ANIA_05070 ANI…
2.01758e-06	73	276	1.88108	Double-stranded DNA binding	http://amigo.geneontology.org/amigo/term/GO:0003690	ANIA_00126 ANIA_00148 ANIA_00228 ANIA_00388 ANIA_00585 ANIA_01134 ANIA_01265 ANIA_01435 ANIA_01479 ANIA_01708 ANIA_01729 ANIA_01843 ANIA_01929 ANIA_02009 ANIA_02491 ANIA_02652 ANIA_02765 ANIA_02780 ANIA_02826 ANIA_02955 ANIA_03217 ANIA_03269 ANIA_03451 ANIA_03502 ANIA_03667 ANIA_03749 ANIA_03944 ANIA_03986 ANIA_04001 ANIA_04123 ANIA_04750 ANIA_04821 ANIA_05052 ANIA_05070 ANIA_05609 ANIA_05892 ANI…
2.12333e-06	60	207	2.02123	Nucleolus	http://amigo.geneontology.org/amigo/term/GO:0005730	ANIA_00192 ANIA_00237 ANIA_00475 ANIA_00589 ANIA_00637 ANIA_00695 ANIA_00752 ANIA_00844 ANIA_01164 ANIA_01949 ANIA_02147 ANIA_02153 ANIA_02252 ANIA_02482 ANIA_02747 ANIA_03167 ANIA_03451 ANIA_03657 ANIA_03812 ANIA_03938 ANIA_03944 ANIA_04346 ANIA_04460 ANIA_04469 ANIA_04599 ANIA_04631 ANIA_05177 ANIA_05406 ANIA_05455 ANIA_05685 ANIA_05702 ANIA_05717 ANIA_06149 ANIA_06233 ANIA_06266 ANIA_06558 ANI…
8.19854e-06	36	104	2.43737	Cellular response to nutrient	http://amigo.geneontology.org/amigo/term/GO:0031670	ANIA_00388 ANIA_00554 ANIA_00585 ANIA_01134 ANIA_02780 ANIA_02955 ANIA_03217 ANIA_03269 ANIA_03502 ANIA_03986 ANIA_04001 ANIA_04489 ANIA_04750 ANIA_04821 ANIA_06846 ANIA_07346 ANIA_07468 ANIA_07971 ANIA_08111 ANIA_08164 ANIA_08168 ANIA_08355 ANIA_08369 ANIA_08506 ANIA_08732 ANIA_08902 ANIA_08978 ANIA_09292 ANIA_09458 ANIA_10423 ANIA_10504 ANIA_10543 ANIA_10550 ANIA_10638 ANIA_11093 ANIA_11098
8.66254e-06	296	1588	1.30117	Gene expression	http://amigo.geneontology.org/amigo/term/GO:0010467	ANIA_00072 ANIA_00114 ANIA_00119 ANIA_00124 ANIA_00130 ANIA_00134 ANIA_00148 ANIA_00154 ANIA_00191 ANIA_00192 ANIA_00197 ANIA_00237 ANIA_00388 ANIA_00475 ANIA_00486 ANIA_00502 ANIA_00507 ANIA_00554 ANIA_00585 ANIA_00589 ANIA_00637 ANIA_00695 ANIA_00752 ANIA_00804 ANIA_00807 ANIA_00902 ANIA_00937 ANIA_00956 ANIA_00978 ANIA_01077 ANIA_01080 ANIA_01134 ANIA_01164 ANIA_01201 ANIA_01205 ANIA_01227 ANI…
1.00238e-05	28	72	2.76235	Carbon catabolite activation of transcription	http://amigo.geneontology.org/amigo/term/GO:0045991	ANIA_00388 ANIA_00554 ANIA_01134 ANIA_02780 ANIA_03217 ANIA_03269 ANIA_03502 ANIA_03986 ANIA_04001 ANIA_04750 ANIA_04821 ANIA_07346 ANIA_07971 ANIA_08111 ANIA_08164 ANIA_08355 ANIA_08506 ANIA_08732 ANIA_08978 ANIA_09292 ANIA_09458 ANIA_10423 ANIA_10504 ANIA_10543 ANIA_10550 ANIA_10638 ANIA_11093 ANIA_11098
1.02457e-05	36	105	2.41371	Response to nutrient	http://amigo.geneontology.org/amigo/term/GO:0007584	ANIA_00388 ANIA_00554 ANIA_00585 ANIA_01134 ANIA_02780 ANIA_02955 ANIA_03217 ANIA_03269 ANIA_03502 ANIA_03986 ANIA_04001 ANIA_04489 ANIA_04750 ANIA_04821 ANIA_06846 ANIA_07346 ANIA_07468 ANIA_07971 ANIA_08111 ANIA_08164 ANIA_08168 ANIA_08355 ANIA_08369 ANIA_08506 ANIA_08732 ANIA_08902 ANIA_08978 ANIA_09292 ANIA_09458 ANIA_10423 ANIA_10504 ANIA_10543 ANIA_10550 ANIA_10638 ANIA_11093 ANIA_11098
1.8879e-05	30	82	2.58971	Carbon catabolite regulation of transcription	http://amigo.geneontology.org/amigo/term/GO:0045990	ANIA_00388 ANIA_00554 ANIA_00585 ANIA_01134 ANIA_02780 ANIA_03217 ANIA_03269 ANIA_03502 ANIA_03986 ANIA_04001 ANIA_04750 ANIA_04821 ANIA_07346 ANIA_07468 ANIA_07971 ANIA_08111 ANIA_08164 ANIA_08355 ANIA_08506 ANIA_08732 ANIA_08978 ANIA_09292 ANIA_09458 ANIA_10423 ANIA_10504 ANIA_10543 ANIA_10550 ANIA_10638 ANIA_11093 ANIA_11098
1.89371e-05	29	78	2.63514	Carbon catabolite regulation of transcription from RNA polymerase II promoter	http://amigo.geneontology.org/amigo/term/GO:0000429	ANIA_00388 ANIA_00585 ANIA_01134 ANIA_02780 ANIA_03217 ANIA_03269 ANIA_03502 ANIA_03986 ANIA_04001 ANIA_04750 ANIA_04821 ANIA_07346 ANIA_07468 ANIA_07971 ANIA_08111 ANIA_08164 ANIA_08355 ANIA_08506 ANIA_08732 ANIA_08978 ANIA_09292 ANIA_09458 ANIA_10423 ANIA_10504 ANIA_10543 ANIA_10550 ANIA_10638 ANIA_11093 ANIA_11098
2.07123e-05	63	238	1.86726	Sequence-specific double-stranded DNA binding	http://amigo.geneontology.org/amigo/term/GO:1990837	ANIA_00148 ANIA_00228 ANIA_00388 ANIA_00585 ANIA_01134 ANIA_01265 ANIA_01435 ANIA_01929 ANIA_02009 ANIA_02491 ANIA_02652 ANIA_02780 ANIA_02826 ANIA_02955 ANIA_03217 ANIA_03269 ANIA_03502 ANIA_03667 ANIA_03944 ANIA_03986 ANIA_04001 ANIA_04123 ANIA_04750 ANIA_04821 ANIA_05052 ANIA_05070 ANIA_05609 ANIA_05892 ANIA_05924 ANIA_05992 ANIA_06706 ANIA_06846 ANIA_06998 ANIA_07300 ANIA_07346 ANIA_07468 ANI…
2.20882e-05	309	1686	1.27856	Biological regulation	http://amigo.geneontology.org/amigo/term/GO:0065007	ANIA_00038 ANIA_00108 ANIA_00119 ANIA_00120 ANIA_00124 ANIA_00134 ANIA_00148 ANIA_00154 ANIA_00191 ANIA_00197 ANIA_00256 ANIA_00388 ANIA_00439 ANIA_00463 ANIA_00486 ANIA_00507 ANIA_00554 ANIA_00556 ANIA_00565 ANIA_00575 ANIA_00585 ANIA_00699 ANIA_00773 ANIA_00807 ANIA_00814 ANIA_00822 ANIA_00901 ANIA_00902 ANIA_00905 ANIA_00937 ANIA_01025 ANIA_01077 ANIA_01134 ANIA_01205 ANIA_01227 ANIA_01265 ANI…
2.40829e-05	43	140	2.15183	Cellular response to extracellular stimulus	http://amigo.geneontology.org/amigo/term/GO:0031668	ANIA_00388 ANIA_00439 ANIA_00554 ANIA_00585 ANIA_01134 ANIA_01733 ANIA_02780 ANIA_02955 ANIA_03217 ANIA_03269 ANIA_03502 ANIA_03986 ANIA_04001 ANIA_04489 ANIA_04750 ANIA_04821 ANIA_05708 ANIA_05823 ANIA_06846 ANIA_07346 ANIA_07468 ANIA_07971 ANIA_08111 ANIA_08164 ANIA_08168 ANIA_08355 ANIA_08369 ANIA_08506 ANIA_08540 ANIA_08732 ANIA_08902 ANIA_08978 ANIA_09292 ANIA_09458 ANIA_10171 ANIA_10423 ANI…
2.40829e-05	43	140	2.15183	Cellular response to nutrient levels	http://amigo.geneontology.org/amigo/term/GO:0031669	ANIA_00388 ANIA_00439 ANIA_00554 ANIA_00585 ANIA_01134 ANIA_01733 ANIA_02780 ANIA_02955 ANIA_03217 ANIA_03269 ANIA_03502 ANIA_03986 ANIA_04001 ANIA_04489 ANIA_04750 ANIA_04821 ANIA_05708 ANIA_05823 ANIA_06846 ANIA_07346 ANIA_07468 ANIA_07971 ANIA_08111 ANIA_08164 ANIA_08168 ANIA_08355 ANIA_08369 ANIA_08506 ANIA_08540 ANIA_08732 ANIA_08902 ANIA_08978 ANIA_09292 ANIA_09458 ANIA_10171 ANIA_10423 ANI…
2.40829e-05	43	140	2.15183	Cellular response to external stimulus	http://amigo.geneontology.org/amigo/term/GO:0071496	ANIA_00388 ANIA_00439 ANIA_00554 ANIA_00585 ANIA_01134 ANIA_01733 ANIA_02780 ANIA_02955 ANIA_03217 ANIA_03269 ANIA_03502 ANIA_03986 ANIA_04001 ANIA_04489 ANIA_04750 ANIA_04821 ANIA_05708 ANIA_05823 ANIA_06846 ANIA_07346 ANIA_07468 ANIA_07971 ANIA_08111 ANIA_08164 ANIA_08168 ANIA_08355 ANIA_08369 ANIA_08506 ANIA_08540 ANIA_08732 ANIA_08902 ANIA_08978 ANIA_09292 ANIA_09458 ANIA_10171 ANIA_10423 ANI…
2.40829e-05	27	71	2.7023	Carbon catabolite activation of transcription from RNA polymerase II promoter	http://amigo.geneontology.org/amigo/term/GO:0000436	ANIA_00388 ANIA_01134 ANIA_02780 ANIA_03217 ANIA_03269 ANIA_03502 ANIA_03986 ANIA_04001 ANIA_04750 ANIA_04821 ANIA_07346 ANIA_07971 ANIA_08111 ANIA_08164 ANIA_08355 ANIA_08506 ANIA_08732 ANIA_08978 ANIA_09292 ANIA_09458 ANIA_10423 ANIA_10504 ANIA_10543 ANIA_10550 ANIA_10638 ANIA_11093 ANIA_11098
3.67799e-05	159	779	1.4316	Carbohydrate derivative binding	http://amigo.geneontology.org/amigo/term/GO:0097367	ANIA_00038 ANIA_00114 ANIA_00124 ANIA_00126 ANIA_00221 ANIA_00228 ANIA_00299 ANIA_00330 ANIA_00381 ANIA_00490 ANIA_00502 ANIA_00565 ANIA_00576 ANIA_00589 ANIA_00637 ANIA_00699 ANIA_00797 ANIA_00804 ANIA_00822 ANIA_00866 ANIA_00948 ANIA_01071 ANIA_01182 ANIA_01201 ANIA_01296 ANIA_01326 ANIA_01394 ANIA_01408 ANIA_01479 ANIA_01498 ANIA_01580 ANIA_01680 ANIA_01708 ANIA_01800 ANIA_01867 ANIA_01911 ANI…
5.22004e-05	43	144	2.09122	Response to extracellular stimulus	http://amigo.geneontology.org/amigo/term/GO:0009991	ANIA_00388 ANIA_00439 ANIA_00554 ANIA_00585 ANIA_01134 ANIA_01733 ANIA_02780 ANIA_02955 ANIA_03217 ANIA_03269 ANIA_03502 ANIA_03986 ANIA_04001 ANIA_04489 ANIA_04750 ANIA_04821 ANIA_05708 ANIA_05823 ANIA_06846 ANIA_07346 ANIA_07468 ANIA_07971 ANIA_08111 ANIA_08164 ANIA_08168 ANIA_08355 ANIA_08369 ANIA_08506 ANIA_08540 ANIA_08732 ANIA_08902 ANIA_08978 ANIA_09292 ANIA_09458 ANIA_10171 ANIA_10423 ANI…
5.22004e-05	43	144	2.09122	Response to nutrient levels	http://amigo.geneontology.org/amigo/term/GO:0031667	ANIA_00388 ANIA_00439 ANIA_00554 ANIA_00585 ANIA_01134 ANIA_01733 ANIA_02780 ANIA_02955 ANIA_03217 ANIA_03269 ANIA_03502 ANIA_03986 ANIA_04001 ANIA_04489 ANIA_04750 ANIA_04821 ANIA_05708 ANIA_05823 ANIA_06846 ANIA_07346 ANIA_07468 ANIA_07971 ANIA_08111 ANIA_08164 ANIA_08168 ANIA_08355 ANIA_08369 ANIA_08506 ANIA_08540 ANIA_08732 ANIA_08902 ANIA_08978 ANIA_09292 ANIA_09458 ANIA_10171 ANIA_10423 ANI…
5.22004e-05	72	289	1.73854	NcRNA processing	http://amigo.geneontology.org/amigo/term/GO:0034470	ANIA_00072 ANIA_00114 ANIA_00124 ANIA_00130 ANIA_00191 ANIA_00237 ANIA_00475 ANIA_00502 ANIA_00589 ANIA_00637 ANIA_00695 ANIA_00804 ANIA_00956 ANIA_01164 ANIA_01296 ANIA_01385 ANIA_01949 ANIA_02147 ANIA_02153 ANIA_02252 ANIA_02513 ANIA_03038 ANIA_03056 ANIA_03167 ANIA_03313 ANIA_03652 ANIA_03657 ANIA_03812 ANIA_03938 ANIA_04346 ANIA_04460 ANIA_04469 ANIA_04599 ANIA_04631 ANIA_04771 ANIA_05013 ANI…
5.22004e-05	127	595	1.49412	Adenyl ribonucleotide binding	http://amigo.geneontology.org/amigo/term/GO:0032559	ANIA_00038 ANIA_00114 ANIA_00124 ANIA_00126 ANIA_00228 ANIA_00381 ANIA_00490 ANIA_00565 ANIA_00576 ANIA_00589 ANIA_00637 ANIA_00699 ANIA_00797 ANIA_00822 ANIA_00866 ANIA_00948 ANIA_01071 ANIA_01201 ANIA_01296 ANIA_01326 ANIA_01479 ANIA_01498 ANIA_01580 ANIA_01680 ANIA_01708 ANIA_01800 ANIA_01867 ANIA_01949 ANIA_01956 ANIA_01965 ANIA_02246 ANIA_02349 ANIA_02412 ANIA_02436 ANIA_02482 ANIA_02491 ANI…
5.67588e-05	23	56	2.83634	Regulation of transcription from RNA polymerase II promoter by a nonfermentable carbon source	http://amigo.geneontology.org/amigo/term/GO:0061413	ANIA_00388 ANIA_01134 ANIA_02780 ANIA_03502 ANIA_03986 ANIA_04001 ANIA_04750 ANIA_04821 ANIA_07346 ANIA_07971 ANIA_08164 ANIA_08355 ANIA_08506 ANIA_08732 ANIA_08978 ANIA_09292 ANIA_09458 ANIA_10423 ANIA_10504 ANIA_10550 ANIA_10638 ANIA_11093 ANIA_11098
5.67588e-05	23	56	2.83634	Positive regulation of transcription from RNA polymerase II promoter by a nonfermentable carbon source	http://amigo.geneontology.org/amigo/term/GO:0061414	ANIA_00388 ANIA_01134 ANIA_02780 ANIA_03502 ANIA_03986 ANIA_04001 ANIA_04750 ANIA_04821 ANIA_07346 ANIA_07971 ANIA_08164 ANIA_08355 ANIA_08506 ANIA_08732 ANIA_08978 ANIA_09292 ANIA_09458 ANIA_10423 ANIA_10504 ANIA_10550 ANIA_10638 ANIA_11093 ANIA_11098
5.8887e-05	127	597	1.48904	Adenyl nucleotide binding	http://amigo.geneontology.org/amigo/term/GO:0030554	ANIA_00038 ANIA_00114 ANIA_00124 ANIA_00126 ANIA_00228 ANIA_00381 ANIA_00490 ANIA_00565 ANIA_00576 ANIA_00589 ANIA_00637 ANIA_00699 ANIA_00797 ANIA_00822 ANIA_00866 ANIA_00948 ANIA_01071 ANIA_01201 ANIA_01296 ANIA_01326 ANIA_01479 ANIA_01498 ANIA_01580 ANIA_01680 ANIA_01708 ANIA_01800 ANIA_01867 ANIA_01949 ANIA_01956 ANIA_01965 ANIA_02246 ANIA_02349 ANIA_02412 ANIA_02436 ANIA_02482 ANIA_02491 ANI…
6.77982e-05	146	710	1.44037	Purine nucleotide binding	http://amigo.geneontology.org/amigo/term/GO:0017076	ANIA_00038 ANIA_00114 ANIA_00124 ANIA_00126 ANIA_00228 ANIA_00381 ANIA_00490 ANIA_00565 ANIA_00576 ANIA_00589 ANIA_00637 ANIA_00699 ANIA_00797 ANIA_00804 ANIA_00822 ANIA_00866 ANIA_00948 ANIA_01071 ANIA_01182 ANIA_01201 ANIA_01296 ANIA_01326 ANIA_01394 ANIA_01408 ANIA_01479 ANIA_01498 ANIA_01580 ANIA_01680 ANIA_01708 ANIA_01800 ANIA_01867 ANIA_01911 ANIA_01949 ANIA_01956 ANIA_01965 ANIA_02244 ANI…
7.35138e-05	43	146	2.06217	Response to external stimulus	http://amigo.geneontology.org/amigo/term/GO:0009605	ANIA_00388 ANIA_00439 ANIA_00554 ANIA_00585 ANIA_01134 ANIA_01733 ANIA_02780 ANIA_02955 ANIA_03217 ANIA_03269 ANIA_03502 ANIA_03986 ANIA_04001 ANIA_04489 ANIA_04750 ANIA_04821 ANIA_05708 ANIA_05823 ANIA_06846 ANIA_07346 ANIA_07468 ANIA_07971 ANIA_08111 ANIA_08164 ANIA_08168 ANIA_08355 ANIA_08369 ANIA_08506 ANIA_08540 ANIA_08732 ANIA_08902 ANIA_08978 ANIA_09292 ANIA_09458 ANIA_10171 ANIA_10423 ANI…
7.54333e-05	12	20	4.36161	Kinesin complex	http://amigo.geneontology.org/amigo/term/GO:0005871	ANIA_01071 ANIA_01580 ANIA_03124 ANIA_03721 ANIA_03970 ANIA_06863 ANIA_06875 ANIA_08286 ANIA_08322 ANIA_08457 ANIA_09426 ANIA_10448
7.54333e-05	201	1046	1.35027	Nucleotide binding	http://amigo.geneontology.org/amigo/term/GO:0000166	ANIA_00038 ANIA_00114 ANIA_00124 ANIA_00126 ANIA_00228 ANIA_00330 ANIA_00381 ANIA_00403 ANIA_00490 ANIA_00502 ANIA_00565 ANIA_00576 ANIA_00589 ANIA_00593 ANIA_00637 ANIA_00699 ANIA_00797 ANIA_00804 ANIA_00822 ANIA_00836 ANIA_00866 ANIA_00948 ANIA_00956 ANIA_01006 ANIA_01033 ANIA_01035 ANIA_01071 ANIA_01182 ANIA_01201 ANIA_01296 ANIA_01311 ANIA_01326 ANIA_01394 ANIA_01408 ANIA_01479 ANIA_01498 ANI…
7.54333e-05	201	1046	1.35027	Nucleoside phosphate binding	http://amigo.geneontology.org/amigo/term/GO:1901265	ANIA_00038 ANIA_00114 ANIA_00124 ANIA_00126 ANIA_00228 ANIA_00330 ANIA_00381 ANIA_00403 ANIA_00490 ANIA_00502 ANIA_00565 ANIA_00576 ANIA_00589 ANIA_00593 ANIA_00637 ANIA_00699 ANIA_00797 ANIA_00804 ANIA_00822 ANIA_00836 ANIA_00866 ANIA_00948 ANIA_00956 ANIA_01006 ANIA_01033 ANIA_01035 ANIA_01071 ANIA_01182 ANIA_01201 ANIA_01296 ANIA_01311 ANIA_01326 ANIA_01394 ANIA_01408 ANIA_01479 ANIA_01498 ANI…
8.03579e-05	145	707	1.43666	Purine ribonucleotide binding	http://amigo.geneontology.org/amigo/term/GO:0032555	ANIA_00038 ANIA_00114 ANIA_00124 ANIA_00126 ANIA_00228 ANIA_00381 ANIA_00490 ANIA_00565 ANIA_00576 ANIA_00589 ANIA_00637 ANIA_00699 ANIA_00797 ANIA_00804 ANIA_00822 ANIA_00866 ANIA_00948 ANIA_01071 ANIA_01182 ANIA_01201 ANIA_01296 ANIA_01326 ANIA_01394 ANIA_01408 ANIA_01479 ANIA_01498 ANIA_01580 ANIA_01680 ANIA_01708 ANIA_01800 ANIA_01867 ANIA_01911 ANIA_01949 ANIA_01956 ANIA_01965 ANIA_02244 ANI…
0.000118545	150	742	1.41708	Ribonucleotide binding	http://amigo.geneontology.org/amigo/term/GO:0032553	ANIA_00038 ANIA_00114 ANIA_00124 ANIA_00126 ANIA_00228 ANIA_00330 ANIA_00381 ANIA_00490 ANIA_00502 ANIA_00565 ANIA_00576 ANIA_00589 ANIA_00637 ANIA_00699 ANIA_00797 ANIA_00804 ANIA_00822 ANIA_00866 ANIA_00948 ANIA_01071 ANIA_01182 ANIA_01201 ANIA_01296 ANIA_01326 ANIA_01394 ANIA_01408 ANIA_01479 ANIA_01498 ANIA_01580 ANIA_01680 ANIA_01708 ANIA_01800 ANIA_01867 ANIA_01911 ANIA_01949 ANIA_01956 ANI…
0.000155119	262	1431	1.27959	Cellular nitrogen compound biosynthetic process	http://amigo.geneontology.org/amigo/term/GO:0044271	ANIA_00134 ANIA_00148 ANIA_00154 ANIA_00191 ANIA_00192 ANIA_00197 ANIA_00256 ANIA_00270 ANIA_00388 ANIA_00486 ANIA_00490 ANIA_00507 ANIA_00554 ANIA_00565 ANIA_00585 ANIA_00591 ANIA_00695 ANIA_00752 ANIA_00807 ANIA_00902 ANIA_00937 ANIA_00978 ANIA_01006 ANIA_01077 ANIA_01080 ANIA_01134 ANIA_01201 ANIA_01205 ANIA_01227 ANIA_01265 ANIA_01271 ANIA_01303 ANIA_01369 ANIA_01403 ANIA_01498 ANIA_01690 ANI…
0.000156026	251	1372	1.2878	Nucleic acid binding	http://amigo.geneontology.org/amigo/term/GO:0003676	ANIA_00072 ANIA_00119 ANIA_00126 ANIA_00148 ANIA_00197 ANIA_00228 ANIA_00388 ANIA_00486 ANIA_00507 ANIA_00578 ANIA_00582 ANIA_00585 ANIA_00589 ANIA_00637 ANIA_00695 ANIA_00752 ANIA_00902 ANIA_00937 ANIA_00978 ANIA_01077 ANIA_01080 ANIA_01134 ANIA_01265 ANIA_01288 ANIA_01303 ANIA_01408 ANIA_01435 ANIA_01479 ANIA_01690 ANIA_01708 ANIA_01729 ANIA_01843 ANIA_01893 ANIA_01929 ANIA_01944 ANIA_01949 ANI…
0.00017987	26	76	2.49379	Glycosyl compound metabolic process	http://amigo.geneontology.org/amigo/term/GO:1901657	ANIA_00130 ANIA_00502 ANIA_01071 ANIA_01498 ANIA_01580 ANIA_01965 ANIA_02494 ANIA_03340 ANIA_03557 ANIA_03881 ANIA_05884 ANIA_06711 ANIA_07108 ANIA_07363 ANIA_07502 ANIA_07624 ANIA_08214 ANIA_08323 ANIA_08457 ANIA_08524 ANIA_08533 ANIA_08545 ANIA_08611 ANIA_09426 ANIA_10180 ANIA_10230
0.000271757	13	25	3.74069	Microtubule motor activity	http://amigo.geneontology.org/amigo/term/GO:0003777	ANIA_01071 ANIA_01580 ANIA_03124 ANIA_03721 ANIA_03970 ANIA_06863 ANIA_06875 ANIA_08286 ANIA_08322 ANIA_08457 ANIA_08862 ANIA_09426 ANIA_10448
0.000271757	23	64	2.60386	Nucleoside metabolic process	http://amigo.geneontology.org/amigo/term/GO:0009116	ANIA_01071 ANIA_01498 ANIA_01580 ANIA_01965 ANIA_02494 ANIA_03340 ANIA_03557 ANIA_03881 ANIA_05884 ANIA_06711 ANIA_07108 ANIA_07363 ANIA_07502 ANIA_08214 ANIA_08323 ANIA_08457 ANIA_08524 ANIA_08533 ANIA_08545 ANIA_08611 ANIA_09426 ANIA_10180 ANIA_10230
[truncated: 773 more rows]

## Sheet: Anid wt NaCl + Sorbitol
NaCl + sorbitol vs. Untreated	A. nidulans	THS30	downregulated genes	DEG; log2FC<-2
[truncated: 881 more rows]

## Sheet: Anid gfdB vs wt
Untreated	A. nidulans	DgdfB vs. THS30	downregulated genes	DEG; log2FC<-2
[truncated: 292 more rows]

[truncated: 10 more sheets: Anid gfdB Sorbitol, Anid gfdB NaCl, Anid gfdB NaCl + Sorbitol, Awentii wt Sorbitol, Awentii wt NaCl, Awentii wt NaCl+sorbitol, Awentii gfdB vs wt, Awentii gfdB Sorbitol, Awentii gfdB NaCl, Awentii gfdB NaCl+sorbitol]
