# Supplementary material for: Aspergillus nidulans gfdB, Encoding the Hyperosmotic Stress Protein Glycerol-3-phosphate Dehydrogenase, Disrupts Osmoadaptation in Aspergillus wentii
Source: J Fungi (Basel). 2024 Apr 16;10(4):291. doi: 10.3390/jof10040291 (PMC11051529; doi:10.3390/jof10040291)
Supplement: Supplementary file 1 [file jof-10-00291-s001.zip › Table S4.xlsx]

## Sheet: Overwiev
Table S4	RNAseq data of "osmotic stress", "oxidative stress" and "glycerol metabolism" genes in A. nidulans as well as the RNAseq data of their A. wentii orthologues
	Sheet 1	RNAseq data of "osmotic stress" genes
	Sheet 2	RNAseq data of "oxidative stress" genes
	Sheet 3	RNAseq data of "glycerol metabolism" genes

## Sheet: osmotic stress
"Osmotic stress" genes
In the case of the A. wentii orthologues, best hits are marked with bold letters.
A. nidulans
GENE ID	Gene name	Description (FungiDB)	A. nidulans THS30						A. nidulans DgfdB						A. nidulans THS30 vs. DgfdB
			Sorbitol		NaCl		NaCl + Sorbitol		Sorbitol		NaCl		NaCl + Sorbitol		Untreated		Sorbitol		NaCl		NaCl + Sorbitol
			log2FoldChange	padj	log2FoldChange	padj	log2FoldChange	padj	log2FoldChange	padj	log2FoldChange	padj	log2FoldChange	padj	log2FoldChange	padj	log2FoldChange	padj	log2FoldChange	padj	log2FoldChange	padj
AN4479	nikA	Putative histidine-specific protein kinase, part of a two-component signal transduction phosphorelay system involved in response to fungicides	0.000221916	1	-0.259609	0.0978216	0.691938	4.60217e-06	0.169195	0.297099	-0.201649	0.210338	0.427046	0.00681868	0.375864	0.0464379	0.544837	0.000893211	0.433823	0.0187401	0.110972	0.681226
AN0931	pbsA	Mitogen activated protein kinase kinase (MAPKK) of the HOG signaling pathway that regulates osmotic stress response	1.49423	1.5616e-34	2.53972	9.71829e-99	0.0735433	0.627161	1.83477	1.87518e-51	2.71229	3.02276e-112	0.27356	0.0464051	0.0616318	0.778887	0.402168	0.00350065	0.234202	0.162947	0.261648	0.13968
AN2005	ypdA	Histidine-containing phosphotransfer protein, part of a two-component signal transducer involved in the HOG signaling pathway that regulates osmotic stress response	0.308001	0.147132	1.30656	6.94294e-12	-0.0899729	0.704083	0.487951	0.0151241	1.63425	8.33508e-18	0.131881	0.592554	-0.260558	0.354117	-0.0806076	0.774803	0.0671331	0.866748	-0.038704	0.929574
AN7697	sskA	Response regulator, part of a two-component signal transducer involved in the HOG signaling pathway that regulates osmotic stress response	0.743387	4.41612e-05	-0.231307	0.235853	1.15992	1.32359e-10	1.54345	2.68147e-18	-0.114647	0.586736	1.42673	2.35935e-15	0.195938	0.469248	0.996003	2.1051e-07	0.312598	0.214111	0.462743	0.0533192
AN3688	srrA	Response regulator, part of a two-component signal transduction system involved in control of stress response and conidiation	-0.983475	4.65461e-08	-0.647014	0.000363595	0.0266442	0.910246	-0.311825	0.104384	-0.120079	0.567668	0.276938	0.17462	-0.0595404	0.854931	0.61211	0.00242938	0.467395	0.0434954	0.190753	0.52608
AN6982	ptpA	Putative phosphotyrosine-specific protein phosphatase of the HOG signaling pathway that regulates osmotic stress response	1.30378	6.4991e-27	2.24789	1.26533e-78	-0.113189	0.432372	1.55702	6.24664e-38	2.50878	1.42275e-97	0.0432773	0.799904	0.149265	0.416631	0.402505	0.0033133	0.410156	0.00559753	0.305732	0.0692968
AN1017	hogA	Mitogen-activated protein kinase, putative	0.743262	6.38951e-06	2.33142	8.60497e-49	-0.0894209	0.653057	0.501488	0.00269069	2.1478	1.59147e-41	-0.0316899	0.895865	0.273976	0.225849	0.0322015	0.899397	0.0903506	0.767713	0.331707	0.154481
AN1652	msnA	Putative zinc-finger transcription factor	-0.107517	0.746845	-0.862086	0.000717848	0.885299	0.000688751	0.213806	0.44792	-0.778961	0.00244975	0.64324	0.0177622	0.54016	0.104442	0.861483	0.00209874	0.623285	0.0550284	0.298102	0.469671
AN2911	atfA	Basic-region leucine zipper transcription factor	2.05968	2.07686e-45	2.66671	3.9221e-76	0.147335	0.393228	2.48696	1.00607e-65	2.87877	2.71751e-88	0.156042	0.382836	-0.0188974	0.946788	0.408381	0.0152595	0.193165	0.380783	-0.0101908	0.977993
AN0351	gfdA	Glycerol-3-phosphate dehydrogenase [NAD+]	0.10675	0.513642	0.787156	4.02818e-09	-0.338469	0.0188296	0.163432	0.27082	0.851898	2.1463e-10	-0.377398	0.00966741	-0.051814	0.833423	0.00486723	0.983338	0.0129282	0.96829	-0.0907427	0.723358
AN6792	gfdB	Glycerol-3-phosphate dehydrogenase [NAD+], putative	4.02274	2.13213e-54	5.84039	9.2868e-115	0.18635	0.574024
AN1216	gpp2	Putative glycerol-3-phosphate phosphatase	0.662772	4.69233e-05	0.208736	0.232486	0.012726	0.953332	1.1007	6.21493e-12	0.550416	0.000832005	0.169293	0.382836	-0.145751	0.566697	0.292178	0.127538	0.19593	0.428293	0.0108163	0.978325
AN5523	tpsA	Putative alpha,alpha-trehalose-phosphate synthase (UDP-forming) with a role in trehalose biosynthesis	1.06043	3.48007e-18	1.24418	7.14125e-25	0.0971906	0.504894	1.26042	3.04603e-25	1.50238	1.49116e-35	0.477241	0.000213386	-0.0185635	0.935633	0.181432	0.234403	0.239636	0.15218	0.361487	0.0236281
AN3441	orlA	Trehalose 6-phosphate phosphatase, predicted subunit of the trehalose-6-phosphate synthase/phosphatase complex	0.490039	0.00942856	1.46514	1.7722e-16	-0.698143	0.000189886	0.513293	0.00591929	1.47713	1.12552e-16	-0.459298	0.0191632	0.0577694	0.860171	0.081024	0.757172	0.0697589	0.851314	0.296614	0.279406
AN5635	treB	Putative alpha, alpha-trehalase with a predicted role in trehalose hydrolysis	1.06901	3.32076e-22	2.21859	5.79247e-93	0.467651	4.90392e-05	1.05606	1.37371e-21	2.37432	6.08978e-106	0.380397	0.00134494	-0.0108561	0.961501	-0.023806	0.891892	0.144868	0.380569	-0.0981102	0.619127
AN4859	pmaA	Plasma membrane ATPase with a predicted role in energy metabolism	0.851386	1.53422e-06	0.890656	3.55976e-07	0.605746	0.000910229	0.931032	1.17414e-07	0.701831	7.45462e-05	0.153457	0.476264	0.340726	0.152636	0.420371	0.038752	0.151901	0.605105	-0.111563	0.737992
Behavior		Subgroup	No. genes	p-value	No. genes	p-value	No. genes	p-value	No. genes	p-value	No. genes	p-value	No. genes	p-value	No. genes	p-value	No. genes	p-value	No. genes	p-value	No. genes	p-value
downregulated in the	group	DEG; log2FC < 0	1	0.995077	2	0.981975	2	0.950009	0	1	1	0.996458	2	0.92993	0	1	0	1	0	1	0	1
downregulated in the	group	DEG; log2FC < -1	0	1	0	1	0	1	0	1	0	1	0	1	0	1	0	1	0	1	0	1
downregulated in the	group	DEG; log2FC < -2	0	1	0	1	0	1	0	1	0	1	0	1	0	1	0	1	0	1	0	1
upregulated in the	group	DEG; log2FC > 0	11	0.00161405	11	0.00294196	5	0.361582	11	0.000681397	11	0.00100935	6	0.0856749	1	0.758704	8	0.00129689	4	0.0378184	1	0.632014
upregulated in the	group	DEG; log2FC > 1	6	0.0188463	9	0.000787357	1	0.716103	7	0.00296631	8	0.00167611	1	0.599588	0	1	0	1	0	1	0	1
upregulated in the	group	DEG; log2FC > 2	2	0.220786	6	0.00188252	0	1	1	0.536675	5	0.0043774	0	1	0	1	0	1	0	1	0	1
all genes in the	group		16		16		16		15		15		15		15		15		15		15
downregulated in the	genome	DEG; log2FC < 0	3103		3508		2899		3278		3443		2840		730		1699		694		576
downregulated in the	genome	DEG; log2FC < -1	1031		1530		687		1255		1538		638		49		161		106		59
downregulated in the	genome	DEG; log2FC < -2	162		288		128		231		300		107		12		32		33		16
upregulated in the	genome	DEG; log2FC > 0	3310		3537		2722		3304		3444		2386		993		1842		973		708
upregulated in the	genome	DEG; log2FC > 1	1572		2025		831		1596		1913		650		202		257		109		144
upregulated in the	genome	DEG; log2FC > 2	608		987		168		549		855		141		22		39		21		19
all genes in the	genome		10988		10988		10988		10988		10988		10988		10988		10988		10988		10988
A. wentii
Gene ID	A. nidulans orthologue		A. wentii CBS141173						A. wentii 'c gfdB						A. wentii CBS141173 vs. 'c gfdB
			Sorbitol		NaCl		NaCl + Sorbitol		Sorbitol		NaCl		NaCl + Sorbitol		Untreated		Sorbitol		NaCl		NaCl + Sorbitol
	Gene ID	Gene name	log2FoldChange	padj	log2FoldChange	padj	log2FoldChange	padj	log2FoldChange	padj	log2FoldChange	padj	log2FoldChange	padj	log2FoldChange	padj	log2FoldChange	padj	log2FoldChange	padj	log2FoldChange	padj
ASPWEDRAFT_40694	AN4479	nikA	0.0761611	0.804001	-0.814408	0.000461374	0.0197631	0.954962	-0.262244	0.342412	-0.375607	0.143516	0.135941	0.662768	-0.257328	0.409495	-0.595733	0.0179412	0.181474	0.60624	-0.14115	0.714758
ASPWEDRAFT_112101	AN4479	nikA	0.168992	0.638822	0.0850763	0.815594	0.672183	0.033085	-0.446279	0.163975	-0.829928	0.00484303	-0.0704507	0.86391	1.14699	0.000106274	0.53172	0.0996374	0.231987	0.597826	0.404357	0.307706
ASPWEDRAFT_121265	AN4479	nikA	0.223124	0.812244	-0.606521	0.468133	-1.08598	0.227547	-0.331489	0.768852	0.924322	0.307972	-0.397385	0.755872	-1.22159	0.209678	-1.7762	0.0482976	0.309254	0.805786	-0.532997	0.725809
ASPWEDRAFT_184594	AN4479	nikA	0.186426	0.75856	-0.434593	0.404044	-1.79129	0.000227124	-1.07924	0.0315814	0.84779	0.0897339	-1.75752	0.000304569	-0.304166	0.653587	-1.56983	0.00131547	0.978217	0.0804811	-0.270395	0.728585
ASPWEDRAFT_51084	AN0931	pbsA	-0.0564322	0.856895	-0.0159171	0.958528	-0.244497	0.382123	0.171625	0.540895	0.286214	0.267537	-0.516971	0.0435077	0.206377	0.515336	0.434434	0.0894384	0.508508	0.0641222	-0.0660965	0.880882
ASPWEDRAFT_99233	AN2005	ypdA	2.75997	6.58e-23	3.2843	7.48e-33	1.3846	5.19e-06	2.16633	6.73e-14	2.81176	5.39e-24	1.01394	0.00114815	0.738565	0.0308938	0.144922	0.700524	0.266018	0.517764	0.367904	0.373967
ASPWEDRAFT_99575	AN7697	sskA	0.109554	0.605704	-0.0743449	0.720576	0.275382	0.161729	0.352246	0.0611381	0.0551244	0.804881	0.436353	0.0200751	0.162864	0.488409	0.405557	0.0289498	0.292334	0.177178	0.323835	0.144381
ASPWEDRAFT_202686	AN3688	srrA	-1.2771	0.00563375	-3.06504	6.83e-13	-1.58061	0.000732834	-1.16848	0.0140663	-1.09964	0.0178831	-1.21007	0.0117548	-0.963545	0.064076	-0.854923	0.0838738	1.00185	0.0601831	-0.593007	0.339504
ASPWEDRAFT_53169	AN6982	ptpA	0.308796	0.329659	0.131815	0.690854	-1.56585	1.76e-08	-1.29998	3.55e-06	0.178728	0.591094	-1.79902	6.17e-11	0.472051	0.162977	-1.13672	6.98e-05	0.518963	0.125545	0.238888	0.573678
ASPWEDRAFT_111477	AN1017	hogA	0.136753	0.606983	-0.278344	0.229592	-0.447715	0.0611052	-0.629374	0.00548286	-0.106945	0.687611	-0.84946	0.000141256	-0.0306896	0.935477	-0.796817	0.00036783	0.140709	0.672848	-0.432434	0.112134
ASPWEDRAFT_41261	AN1017	hogA	-0.683882	0.121553	0.773052	0.0646566	-0.545993	0.248995	0.198618	0.697743	0.762016	0.0784784	-0.382215	0.448861	-1.81231	1.48e-05	-0.929809	0.0344161	-1.82334	1.94e-05	-1.64853	0.000200042
ASPWEDRAFT_101996	AN1652	msnA	-0.216322	0.620891	0.331467	0.397089	0.0944551	0.847507	0.437724	0.282072	-0.240474	0.57016	0.233237	0.611508	-0.174821	0.740845	0.479225	0.237596	-0.746762	0.076838	-0.0360398	0.961531
ASPWEDRAFT_37015	AN2911	atfA	2.69241	1.6e-29	3.49228	3.58e-50	0.277992	0.361729	1.66485	2.72e-11	2.86016	4.59e-33	0.31476	0.295275	0.124507	0.744174	-0.903054	0.000571872	-0.507616	0.0956837	0.161275	0.695589
ASPWEDRAFT_104967	AN0351, AN6792	gfdA (gfdB)	3.13331	2.87e-25	3.41211	2.06e-30	0.339915	0.376003	1.07782	0.0011053	2.57579	2.34e-17	-0.183207	0.662993	0.633809	0.0933747	-1.42168	1.32e-05	-0.202508	0.682236	0.110687	0.846394
ASPWEDRAFT_104044	AN1216	gpp2	0.193816	0.357535	-0.206256	0.306106	0.918967	6.73e-07	0.847594	6.3e-06	0.260413	0.20248	0.705952	0.000247161	-0.165141	0.514807	0.488637	0.0121549	0.301528	0.196729	-0.378156	0.0994652
ASPWEDRAFT_673647	AN1216	gpp2	1.13707	0.116805	2.01942	0.00195626	-0.801286	0.392292	1.00348	0.239428	2.12131	0.00352884	0.0505042	0.969967	-0.329182	0.77037	-0.462778	0.586015	-0.227293	0.827619	0.522608	0.708794
ASPWEDRAFT_173702	AN3441, AN5523	orlA (tpsA)	-0.425422	0.276899	-1.30264	0.000130165	-1.48105	3.06e-05	-0.729676	0.0514899	-0.214331	0.60894	-0.746208	0.0494854	-0.834575	0.0345187	-1.13883	0.00162786	0.253736	0.625918	-0.0997368	0.878073
ASPWEDRAFT_99274	AN3441, AN5523	(orlA) tpsA	-0.582513	0.188133	-1.28588	0.00119423	-0.452344	0.343159	-1.1086	0.00846527	-0.284177	0.548886	-0.893971	0.0402753	-1.03123	0.0215868	-1.55732	0.000159483	-0.0295299	0.969096	-1.47286	0.000812215
ASPWEDRAFT_111742	AN3441, AN5523	orlA, tpsA	0.500406	0.230048	-0.354966	0.391962	0.13509	0.787123	-0.833573	0.0379752	-0.528534	0.196979	-0.830062	0.042246	0.26095	0.624327	-1.07303	0.00654365	0.0873817	0.897659	-0.704203	0.138799
ASPWEDRAFT_53309	AN3441, AN5523	orlA, tpsA	1.38982	0.305038	1.17338	0.382082	-1.14086	NA	1.2847	NA	1.21551	0.53453	0.623117	0.8142	-1.16029	0.608878	-1.26541	0.417053	-1.11815	0.547327	0.603685	NA
ASPWEDRAFT_33761	AN5635	treB	0.726445	1.66e-06	0.984299	1.77e-11	0.69674	8.94e-06	0.437877	0.00675823	0.392586	0.0133901	0.51796	0.00127754	0.354353	0.04521	0.0657859	0.747815	-0.237361	0.224354	0.175573	0.424705
ASPWEDRAFT_173501	AN4859	pmaA	0.139432	0.781209	0.374518	0.380742	1.24726	0.00216442	0.952454	0.0203163	-0.192741	0.685344	1.51108	0.000141048	0.68359	0.143732	1.49661	0.000169492	0.11633	0.861765	0.94741	0.0398238
ASPWEDRAFT_114988	AN4859	pmaA	1.90114	7.95e-09	2.7803	1.51e-18	0.132949	0.779084	1.14528	0.00170987	2.43125	1.79e-13	-1.11943	0.00968628	0.0556673	0.928336	-0.700188	0.0545974	-0.293386	0.528662	-1.19672	0.0102163
ASPWEDRAFT_66599	AN4859	pmaA	0.889717	0.172159	0.225195	0.76551	0.542411	0.475258	-1.21946	0.122253	0.0191555	0.983954	-0.9901	0.238344	0.628659	0.447071	-1.48052	0.0486692	0.422619	0.653978	-0.903851	0.372917
With all genes
Behavior		Subgroup	No. genes	p-value	No. genes	p-value	No. genes	p-value	No. genes	p-value	No. genes	p-value	No. genes	p-value	No. genes	p-value	No. genes	p-value	No. genes	p-value	No. genes	p-value
downregulated in the	group	DEG; log2FC < 0	1	0.988651	4	0.804504	4	0.528739	6	0.222439	2	0.937798	9	0.00885592	3	0.574854	12	0.000745805	1	0.908792	3	0.312995
downregulated in the	group	DEG; log2FC < -1	1	0.844913	3	0.555572	4	0.118341	4	0.113561	1	0.821776	4	0.11105	2	0.673776	8	0.0112431	1	0.805476	3	0.173783
downregulated in the	group	DEG; log2FC < -2	0	1	1	0.484088	0	1	0	1	0	1	0	1	0	1	0	1	0	1	0	1
upregulated in the	group	DEG; log2FC > 0	5	0.610106	6	0.584722	5	0.257881	7	0.100726	6	0.573486	5	0.341562	4	0.234046	3	0.720484	0	1	1	0.855967
upregulated in the	group	DEG; log2FC > 1	4	0.552092	5	0.514117	2	0.67471	4	0.284919	5	0.475857	2	0.722577	1	0.717555	1	0.849614	0	1	0	1
upregulated in the	group	DEG; log2FC > 2	3	0.254247	5	0.0645169	0	1	1	0.581657	5	0.0622189	0	1	0	1	0	1	0	1	0	1
all genes in the	group		24		24		24		24		24		24		24		24		24		24
With the "best hits" only
Behavior		Subgroup	No. genes	p-value	No. genes	p-value	No. genes	p-value	No. genes	p-value	No. genes	p-value	No. genes	p-value	No. genes	p-value	No. genes	p-value	No. genes	p-value	No. genes	p-value
downregulated in the	group	DEG; log2FC < 0	1	0.926567	4	0.369112	3	0.377166	4	0.211221	1	0.930667	6	0.0155429	1	0.838505	7	0.0099169	0	1	1	0.697598
downregulated in the	group	DEG; log2FC < -1	1	0.66269	3	0.226872	3	0.0942513	3	0.0909907	1	0.634201	2	0.297392	0	1	4	0.111454	0	1	1	0.581871
downregulated in the	group	DEG; log2FC < -2	0	1	2	0.0540237	0	1	0	1	0	1	0	1	0	1	0	1	0	1	0	1
upregulated in the	group	DEG; log2FC > 0	4	0.353148	4	0.484049	4	0.131054	6	0.021283	4	0.475142	5	0.0606937	3	0.171478	3	0.352129	0	1	1	0.676924
upregulated in the	group	DEG; log2FC > 1	3	0.395034	3	0.532039	2	0.385136	3	0.205341	3	0.502675	2	0.429623	0	1	1	0.66869	0	1	0	1
upregulated in the	group	DEG; log2FC > 2	3	0.0772738	3	0.132847	0	1	1	0.398388	3	0.12982	0	1	0	1	0	1	0	1	0	1
all genes in the	group		14		14		14		14		14		14		14		14		14		14
downregulated in the	genome	DEG; log2FC < 0	2153		2775		1976		2183		2196		2022		1545		2463		1201		1036
downregulated in the	genome	DEG; log2FC < -1	945		1504		1006		991		877		983		1190		1722		834		764
downregulated in the	genome	DEG; log2FC < -2	204		344		316		198		102		232		557		762		268		319
upregulated in the	genome	DEG; log2FC > 0	2718		3184		1824		2161		3152		2038		1314		1899		1384		981
upregulated in the	genome	DEG; log2FC > 1	2031		2465		1192		1432		2369		1301		649		960		671		487
upregulated in the	genome	DEG; log2FC > 2	925		1169		319		451		1157		348		151		210		150		109
all genes in the	genome		12659		12659		12659		12659		12659		12659		12659		12659		12659		12659

## Sheet: oxidative stress
"Oxidative stress" genes
In the case of the A. wentii orthologues, best hits are marked with bold letters.
A. nidulans
GENEID	Gene name	Description 1	Description 2	A. nidulans THS30						A. nidulans DgfdB						A. nidulans THS30 vs. DgfdB
				Sorbitol		NaCl		NaCl + Sorbitol		Sorbitol		NaCl		NaCl + Sorbitol		Untreated		Sorbitol		NaCl		NaCl + Sorbitol
				log2FoldChange	padj	log2FoldChange	padj	log2FoldChange	padj	log2FoldChange	padj	log2FoldChange	padj	log2FoldChange	padj	log2FoldChange	padj	log2FoldChange	padj	log2FoldChange	padj	log2FoldChange	padj
AN0241	sodA	superoxide dismutase activity	Cu/Zn-superoxide dismutase	-0.26014	0.000880301	0.241079	0.00182529	-0.0906853	0.295035	-0.301269	0.0001	0.291558	0.000155314	-0.0294944	0.776015	-0.0787338	0.499059	-0.119863	0.201317	-0.0282546	0.858792	-0.0175429	0.916873
AN5577	sodB	superoxide dismutase activity	Manganese-superoxide dismutase	0.386345	0.000197214	1.11851	2.41e-29	0.309862	0.00367941	0.476984	3.35e-06	1.25395	2.37e-36	0.446534	2.32e-05	-0.0761434	0.645973	0.0144952	0.929759	0.0592962	0.751793	0.0605289	0.756359
AN0785	sodM	superoxide dismutase activity	Putative manganese superoxide dismutase	2.07582	0.0695662	3.27164	0.00206203	1.9029	0.113062	0.146502	0.916443	0.84284	0.481288	1.75792	0.0897762	0.785328	NA	-1.14399	0.357686	-1.64347	NA	0.640346	0.644573
AN1131		superoxide dismutase activity	Putative cytosolic Cu/Zn superoxide dismutase	0.565235	7.56e-06	0.355275	0.00614187	0.703455	2.96e-08	0.455661	0.000514903	0.290038	0.0326263	0.698048	7.46e-08	-0.076104	0.727543	-0.185678	0.233063	-0.141341	0.48391	-0.0815107	0.72753
AN8637	catA	catalase activity	Conidia-specific catalase	4.42	2.71e-25	6.74453	5.13e-58	0.794219	0.0971852	2.48618	3.57e-09	5.19089	2.54e-36	0.0348268	0.956409	1.85865	0.00020621	-0.0751666	0.908481	0.305013	0.678011	1.09926	0.0570227
AN9339	catB	catalase activity	catalase B	0.423088	0.0128036	0.962904	2.2e-09	0.88998	6.4e-08	0.790397	1.23e-06	0.971591	1.69e-09	0.565982	0.000917708	0.0987163	0.720427	0.466026	0.0113326	0.107403	0.712766	-0.225282	0.377245
AN5918	catC	catalase activity	Catalase C	-0.756251	1.79e-05	-1.71226	6.05e-20	0.10936	0.597297	-1.13999	5.58e-09	-1.98519	3.42e-20	-0.141808	0.52597	-0.298223	0.216965	-0.681966	0.00173463	-0.571149	0.0567252	-0.549391	0.0148046
AN8553		catalase activity	Putative catalase with a predicted role in gluconic acid and gluconate metabolism	-0.662999	0.00160009	-0.295219	0.182341	0.112656	0.645222	-0.366314	0.105489	-0.0115459	0.96999	0.301546	0.193381	0.0331008	0.929222	0.329786	0.209771	0.316774	0.301319	0.221991	0.506797
AN7388	cpeA/catD	catalase activity	Putative bifunctional catalase-peroxidase	-1.63456	2.44e-11	-0.132299	0.646593	-1.23065	8.46e-07	-1.31241	9.68e-08	-0.25247	0.350806	-1.16806	3.41e-06	0.491419	0.129645	0.81357	0.00357699	0.371247	0.290112	0.55401	0.108566
AN10220	ccp1	cytochrome-c peroxidase activity	Putative cytochrome c peroxidase	0.533464	0.00436322	0.906078	4.65e-07	-0.129671	0.546009	1.00492	2.46e-08	1.09795	8.79e-10	0.202259	0.345136	0.323961	0.191447	0.795414	5.13e-05	0.51583	0.0221678	0.655891	0.00330631
AN5440		cytochrome-c peroxidase activity	Putative cytochrome c peroxidase	1.65567	8.44e-13	1.36261	4.11e-09	-0.167131	0.554261	1.31548	1.83e-08	1.06863	5.67e-06	-0.0926237	0.773918	0.145443	0.71647	-0.194756	0.528435	-0.14853	0.722362	0.21995	0.595539
AN7823		peroxidase activity	Putative peroxidase	1.18142	0.0436706	-0.86394	0.206049	-0.111081	0.885047	-1.163	0.0702962	-1.96535	0.00498072	-0.567679	0.405212	0.826525	0.305503	-1.51789	0.0264342	-0.274883	0.858231	0.369927	0.741095
AN7924		peroxidase activity	Has domain(s) with predicted peroxidase activity	0.0450927	0.849268	-0.44015	0.0229386	0.34647	0.0591985	0.0102887	0.965902	0.0125106	0.962779	-0.0203457	0.941238	0.0283521	0.930515	-0.00645186	0.983338	0.481013	0.060339	-0.338464	0.181719
AN8395		peroxidase activity	Putative peroxidase	0.4325	0.589646	2.56857	3.72e-05	-2.13794	0.0195583	-2.11026	0.0114073	0.00552712	0.999979	-2.63832	0.00335314	0.824693	0.387389	-1.71807	0.0678247	-1.73835	0.0229791	0.32431	0.877944
AN2578		peroxidase activity	Has domain(s) with predicted peroxidase activity	0.423869	0.0100532	0.566659	0.000373539	0.523413	0.00144756	0.949651	1.64e-09	0.73363	3.73e-06	0.987183	7.31e-10	-0.308715	0.149103	0.217067	0.271305	-0.141744	0.586326	0.155055	0.567501
AN6457		peroxidase activity	Has domain(s) with predicted peroxidase activity	1.04804	0.670815	-0.872413	0.737232	2.77061	NA	0.262282	0.911835	1.46722	0.464268	1.13744	0.611835	1.09815	NA	0.312393	NA	3.43779	NA	-0.535015	NA
AN0170	trxA	protein-disulfide reductase activity	Thioredoxin; predicted role in cell redox homeostasis; required for conidiation; expression upregulated after exposure to farnesol	-0.106419	0.516877	0.281154	0.047005	0.339174	0.0186033	0.325075	0.0211776	0.308177	0.0291657	0.254918	0.0917202	0.0446933	0.856414	0.476187	0.00157851	0.0717161	0.781555	-0.039563	0.888039
AN3581	trxR	thioredoxin-disulfide reductase activity	Thioredoxin reductase with a predicted role in pyrimidine metabolism	1.54424	5.14e-15	1.01373	3.23e-07	2.05755	2.23e-25	2.56849	1.25e-39	0.916101	4.53e-06	2.43165	1.24e-34	0.241775	0.413442	1.26602	1.93e-09	0.144142	0.680027	0.615875	0.0150358
AN8692	prxA	thioredoxin peroxidase activity	Thioredoxin-dependent peroxidase	-0.32712	0.0623482	0.0218469	0.920013	-0.25734	0.155235	-0.0103651	0.960228	0.0195	0.92944	-0.224756	0.235072	0.136628	0.600911	0.453383	0.014933	0.134281	0.626206	0.169212	0.542866
AN3687		thioredoxin peroxidase activity	Ortholog(s) have cytosol, mitochondrion, nucleus localization	0.152279	0.120867	0.382314	2.43e-05	0.5142	1.54e-08	0.629743	1.72e-11	0.709434	2.35e-14	0.89325	7.26e-22	-0.611391	9.85e-10	-0.133927	0.236875	-0.284272	0.0119056	-0.232341	0.0537808
AN8080		thioredoxin peroxidase activity	Ortholog(s) have thioredoxin peroxidase activity, role in cell redox homeostasis, cellular response to oxidative stress, response to metal ion and hyphal cell wall, peroxisome, plasma membrane, yeast-form cell wall localization	-0.0809181	0.644397	-0.461877	0.00102537	0.27658	0.0643346	-0.062852	0.699618	-0.516	0.000257603	0.509974	0.00042121	0.0408698	0.869833	0.0589359	0.77022	-0.0132533	0.96869	0.274264	0.165771
AN10223	tpxA	peroxiredoxin activity	Putative 1-Cys peroxiredoxin	-1.00502	3.43e-08	-0.507095	0.0063914	0.0434215	0.852019	-0.576691	0.00192383	-0.505606	0.00678274	-0.0735832	0.763882	-0.00773563	0.983781	0.420592	0.0463708	-0.00624702	0.989745	-0.12474	0.712698
AN3973	tpxB	peroxiredoxin activity	Putative peroxiredoxin	0.666463	0.000245007	1.34432	1.69e-14	0.45263	0.0168376	0.567442	0.00211507	1.52291	5.86e-18	0.315284	0.119794	-0.423335	0.0698225	-0.522356	0.00964252	-0.244745	0.348073	-0.560681	0.0139555
AN5232		peroxiredoxin activity	3-carboxymuconolactone hydrolase (decarboxylating), putative	-0.528805	3.85e-05	0.384065	0.00244324	-0.163135	0.254801	-0.790406	1.76e-08	0.167311	0.240355	-0.342872	0.015984	0.00467757	0.985938	-0.256924	0.126845	-0.212076	0.241592	-0.175059	0.407542
AN4023		peroxiredoxin activity	Has domain(s) with predicted peroxiredoxin activity and role in oxidation-reduction process	0.112937	0.617781	0.0686014	0.75916	-0.163388	0.438963	-0.493925	0.0096698	-0.36731	0.0582574	-0.373148	0.0654506	0.0454054	0.890889	-0.561457	0.0065541	-0.390506	0.11125	-0.164355	0.609077
AN1252		peroxiredoxin activity	Has domain(s) with predicted peroxiredoxin activity and role in oxidation-reduction process	1.63367	4.95e-12	0.331903	0.246062	1.32377	8.77e-08	2.03549	1.72e-16	0.730373	0.00990552	1.28531	1.01e-06	-0.116001	0.814779	0.285814	0.275707	0.282469	0.497873	-0.15446	0.711389
AN0932	glrA	glutathione-disulfide reductase (NADPH) activity	Glutathione reductase, putative	0.271198	0.040626	0.582267	2.85e-06	0.0148594	0.929258	0.632581	4.2e-07	0.772984	4.21e-10	0.25579	0.0640342	-0.0759242	0.720162	0.285459	0.048744	0.114792	0.572527	0.165007	0.408719
AN2846	gpxA	glutathione peroxidase activity	Putative glutathione peroxidase with a predicted role in glutathione biosynthesis; protein induced by farnesol	0.17904	0.188605	0.760041	3.43e-10	-0.361077	0.00510303	0.401878	0.0013054	0.492329	6.6e-05	-0.0379756	0.823677	0.323889	0.0361665	0.546728	3.96e-05	0.0561768	0.815828	0.646991	3.95e-06
AN4905		glutathione peroxidase activity	theta class glutathione S-transferase	-0.296942	0.0565848	1.34968	2.35e-21	-0.935721	2.33e-10	0.144027	0.374334	1.43642	6.84e-24	-0.383773	0.0148919	0.012316	0.965708	0.453285	0.00568132	0.0990582	0.701619	0.564265	0.00164918
AN3255		glutathione peroxidase activity	Predicted glutathione peroxidase	0.328059	0.0155152	1.89059	4.1e-52	0.18291	0.210785	0.44944	0.00121748	1.7575	1.94e-42	0.630739	4.93e-06	-0.454011	0.00456008	-0.332631	0.0282449	-0.587109	4e-05	-0.00618211	0.985503
AN4215		glutathione disulfide oxidoreductase activity	Ortholog(s) have glutathione disulfide oxidoreductase activity, glutathione peroxidase activity, glutathione transferase activity and role in glutathione metabolic process, pathogenesis, removal of superoxide radicals	-0.0521556	0.677729	0.136343	0.196469	0.344326	0.000676156	0.166096	0.114104	0.291092	0.00389857	0.387203	0.000149437	-0.0413384	0.815685	0.176913	0.133531	0.113411	0.457676	0.00153868	0.996314
AN4304		glutathione disulfide oxidoreductase activity	Ortholog(s) have glutathione disulfide oxidoreductase activity, role in cellular response to oxidative stress, response to osmotic stress and mitochondrial matrix localization	0.572412	6.04e-05	0.415291	0.00386399	-0.205118	0.19394	0.352491	0.016735	0.535676	0.000185607	-0.0204416	0.923215	-0.112332	0.622165	-0.332253	0.0417337	0.00805292	0.981215	0.0723444	0.795068
AN7567		glutathione disulfide oxidoreductase activity	Ortholog(s) have RNA polymerase II activating transcription factor binding, glutathione disulfide oxidoreductase activity	-0.637172	1.04e-13	-0.823903	1.52e-21	-0.630785	5.21e-13	-0.57	1.89e-10	-0.502324	2.01e-08	-0.633586	2.04e-12	-0.172239	0.138426	-0.105068	0.361627	0.14934	0.249542	-0.17504	0.176887
AN10379		glutathione transferase activity	Ortholog of A. fumigatus Af293 : Afu7g06460, A. niger CBS 513.88 : An03g05540, Neosartorya fischeri NRRL 181 : NFIA_027750, Aspergillus wentii : Aspwe1_0022967 and Aspergillus versicolor : Aspve1_0056237	0.292523	0.0462398	1.21662	1.28e-19	0.292448	0.050617	0.492456	0.000635767	1.73658	3.68e-38	0.337359	0.0278265	-0.0535001	0.835027	0.146433	0.415712	0.466457	0.00354889	-0.00858921	0.980304
AN5831		glutathione transferase activity	Ortholog of A. nidulans FGSC A4 : AN10273/gst3, A. fumigatus Af293 : Afu2g15770, A. niger CBS 513.88 : An15g06030, An05g00350 and A. oryzae RIB40 : AO090011000920	-0.440416	0.0024769	-0.444647	0.00202307	-0.142205	0.382692	0.489922	0.000714562	0.229756	0.132368	0.259325	0.102765	-0.335895	0.0670886	0.594443	0.000121878	0.338508	0.0679242	0.0656343	0.81495
(Gene set without glutathione, thioredoxin, glutaredox system genes)
Behavior		Subgroup		No. genes	p-value	No. genes	p-value	No. genes	p-value	No. genes	p-value	No. genes	p-value	No. genes	p-value	No. genes	p-value	No. genes	p-value	No. genes	p-value	No. genes	p-value
downregulated in the	group	DEG; log2FC < 0		4	0.703448	2	0.981975	2	0.950009	4	0.749746	2	0.979789	3	0.823373	0	1	2	0.73303	1	0.648174	1	0.577735
downregulated in the	group	DEG; log2FC < -1		1	0.793526	1	0.909359	2	0.264234	3	0.27342	2	0.677356	2	0.237205	0	1	1	0.210484	1	0.143761	0	1
downregulated in the	group	DEG; log2FC < -2		0	1	0	1	1	0.171061	1	0.288363	0	1	1	0.14502	0	1	0	1	0	1	0	1
upregulated in the	group	DEG; log2FC > 0		8	0.0758213	10	0.0122061	3	0.797352	7	0.176786	8	0.0930474	4	0.47023	1	0.78054	3	0.517537	1	0.773402	1	0.655757
upregulated in the	group	DEG; log2FC > 1		3	0.406769	5	0.156911	0	1	3	0.416854	4	0.299268	0	1	0	1	0	1	0	1	0	1
upregulated in the	group	DEG; log2FC > 2		1	0.598042	3	0.16855	0	1	1	0.559856	1	0.726656	0	1	0	1	0	1	0	1	0	1
all genes in the	group			16		16		16		16		16		16		16		16		16		16
(Gene set including glutathione, thioredoxin, glutaredox system genes)
Behavior		Subgroup		No. genes	p-value	No. genes	p-value	No. genes	p-value	No. genes	p-value	No. genes	p-value	No. genes	p-value	No. genes	p-value	No. genes	p-value	No. genes	p-value	No. genes	p-value
downregulated in the	group	DEG; log2FC < 0		8	0.813541	6	0.984824	5	0.97246	8	0.863161	5	0.994201	6	0.920415	2	0.685724	6	0.461828	3	0.381974	2	0.554379
downregulated in the	group	DEG; log2FC < -1		2	0.853413	1	0.994788	2	0.652419	3	0.779571	2	0.966015	2	0.61129	0	1	1	0.403952	1	0.288094	0	1
downregulated in the	group	DEG; log2FC < -2		0	1	0	1	1	0.336848	1	0.525177	0	1	1	0.290383	0	1	0	1	0	1	0	1
upregulated in the	group	DEG; log2FC > 0		15	0.0750707	21	0.000639316	9	0.513316	17	0.0161936	20	0.00137879	11	0.11908	2	0.837795	10	0.0565891	2	0.829009	4	0.186201
upregulated in the	group	DEG; log2FC > 1		5	0.574782	10	0.0957449	2	0.75409	5	0.589148	8	0.25558	2	0.621678	0	1	1	0.563796	0	1	0	1
upregulated in the	group	DEG; log2FC > 2		1	0.864052	3	0.620131	1	0.417313	2	0.527924	1	0.941563	1	0.364115	0	1	0	1	0	1	0	1
all genes in the	group			35		35		35		35		35		35		35		35		35		35
downregulated in the	genome	DEG; log2FC < 0		3103		3508		2899		3278		3443		2840		730		1699		694		576
downregulated in the	genome	DEG; log2FC < -1		1031		1530		687		1255		1538		638		49		161		106		59
downregulated in the	genome	DEG; log2FC < -2		162		288		128		231		300		107		12		32		33		16
upregulated in the	genome	DEG; log2FC > 0		3310		3537		2722		3304		3444		2386		993		1842		973		708
upregulated in the	genome	DEG; log2FC > 1		1572		2025		831		1596		1913		650		202		257		109		144
upregulated in the	genome	DEG; log2FC > 2		608		987		168		549		855		141		22		39		21		19
all genes in the	genome			10988		10988		10988		10988		10988		10988		10988		10988		10988		10988
A. wentii
Gene ID	A. nidulans orthologue			A. wentii CBS141173						A. wentii 'c gfdB						A. wentii CBS141173 vs. 'c gfdB
				Sorbitol		NaCl		NaCl + Sorbitol		Sorbitol		NaCl		NaCl + Sorbitol		Untreated		Sorbitol		NaCl		NaCl + Sorbitol
	Gene ID	Gene name	Description	log2FoldChange	padj	log2FoldChange	padj	log2FoldChange	padj	log2FoldChange	padj	log2FoldChange	padj	log2FoldChange	padj	log2FoldChange	padj	log2FoldChange	padj	log2FoldChange	padj	log2FoldChange	padj
ASPWEDRAFT_23769	AN0241	sodA	superoxide dismutase activity	-0.102221	0.772631	-0.299294	0.315122	0.0968844	0.790853	0.303009	0.338956	-0.105947	0.75822	0.557304	0.0633599	-0.105673	0.801481	0.299557	0.350467	0.0876741	0.849302	0.354747	0.345849
ASPWEDRAFT_487616	AN0785, AN5577	sodB (sodM)	superoxide dismutase activity	-1.20087	0.0499049	-0.292413	0.666162	0.582649	0.39765	-0.282157	0.692875	-1.0235	0.0953312	0.507855	0.472738	0.334609	0.690684	1.25332	0.044395	-0.396478	0.650156	0.259815	0.790735
ASPWEDRAFT_166636	AN0785, AN5577	(sodB) sodM	superoxide dismutase activity	-0.0671334	0.856872	0.108599	0.745841	0.160576	0.651009	0.691524	0.0181704	0.326846	0.288025	0.922063	0.00134928	-0.418553	0.221854	0.340105	0.287204	-0.200306	0.628188	0.342934	0.37224
ASPWEDRAFT_506345	AN1131		superoxide dismutase activity	1.34569	0.0015644	1.09537	0.00961679	1.2304	0.0062417	-1.05458	0.032088	0.350372	0.483646	-0.409125	0.461595	0.482833	0.394696	-1.91743	3.19e-05	-0.262164	0.686375	-1.1567	0.0270249
ASPWEDRAFT_104112	AN1131		superoxide dismutase activity	1.0819	0.00285626	0.730811	0.0477658	0.283195	0.540534	-0.283538	0.487825	-0.192513	0.641319	0.40067	0.319228	1.92713	4.68e-08	0.561694	0.145876	1.0038	0.0102356	2.0446	2.58e-08
ASPWEDRAFT_53830	AN5918, AN8637, AN9339	(catA, catB) catC	catalase activity	3.12519	1.68e-12	2.58631	4.22e-09	0.535684	0.327214	2.08749	7.05e-06	3.49235	1.68e-15	1.24388	0.0112651	0.0330079	0.968664	-1.00469	0.0430238	0.939045	0.0880189	0.7412	0.221341
ASPWEDRAFT_48635	AN5918, AN8637, AN9339	catA (catB, catC)	catalase activity	1.46598	0.000400847	0.977059	0.0212821	0.217457	0.707393	0.26254	0.648157	0.393206	0.457848	-0.872491	0.157508	-0.0390384	0.961415	-1.24248	0.00609352	-0.622891	0.254938	-1.12899	0.0894329
ASPWEDRAFT_41216	AN5918, AN8637, AN9339	(catA) catB (catC)	catalase activity	-0.252589	0.68395	0.00878828	0.989374	-2.36942	1.86e-06	0.591664	0.294363	0.913061	0.0794528	0.325475	0.606789	-0.109301	0.892172	0.734952	0.18491	0.794971	0.197361	2.58559	3.48e-07
ASPWEDRAFT_66442	AN5918, AN8637, AN9339	catA, catB, catC	catalase activity	0.659825	0.54293	1.65727	0.0648062	-2.47313	0.121098	1.90677	0.266052	2.9579	0.0459989	-0.283721	0.919642	-2.43261	0.155868	-1.18566	0.32519	-1.13199	0.327772	-0.2432	0.94927
ASPWEDRAFT_116154	AN5918, AN8637, AN9339	catA, catB, catC	catalase activity	5.90013	1.83e-30	4.20932	3.58e-16	1.52365	0.0101086	2.08497	0.000232603	4.00726	2.5e-14	1.37644	0.021868	0.312403	0.706311	-3.50276	7.02e-11	0.110346	0.911154	0.165194	0.871144
ASPWEDRAFT_140699	AN5918, AN8637, AN9339	catA, catB, catC	catalase activity	-0.610618	0.42269	-0.946684	0.178376	-1.62924	0.0305464	-0.519018	0.501428	-1.27351	0.0642065	-0.268173	0.763819	1.07576	0.16986	1.16736	0.109177	0.748936	0.413389	2.43683	0.00160004
ASPWEDRAFT_33541	AN5440, AN7388, AN10220	(ccp1, cpeA/catD)	cytochrome-c peroxidase activity, catalase activity	-0.351803	0.461389	1.19652	0.00309468	0.041407	0.946386	-0.579565	0.206015	0.442805	0.333588	-0.915602	0.0386794	0.728437	0.137534	0.500674	0.288469	-0.0252756	0.973997	-0.228572	0.734723
ASPWEDRAFT_54185	AN5440, AN7388, AN10220	(ccp1) cpeA/catD	cytochrome-c peroxidase activity, catalase activity	2.36441	0.0841484	-1.3794	0.320952	-5.16906	7.83e-05	-0.118066	0.946528	2.0737	0.13019	-0.464955	0.79531	-1.6236	0.321001	-4.10607	0.00192704	1.82949	0.265096	3.0805	0.043002
ASPWEDRAFT_235979	AN5440, AN7388, AN10220	ccp1 (cpeA/catD)	cytochrome-c peroxidase activity, catalase activity	1.77634	0.000149645	1.39488	0.00271718	-0.393318	0.494495	1.19099	0.0161239	2.0553	8.1e-06	0.786884	0.135369	-0.0393455	0.962228	-0.624696	0.243738	0.621071	0.310613	1.14086	0.0410403
ASPWEDRAFT_124254	AN2578, AN6457, AN8395		peroxidase activity	-0.6725	0.363689	-0.649065	0.367044	1.58049	0.0135448	1.84726	0.0239833	0.297253	0.780225	2.98141	0.000100527	-1.60828	0.0648216	0.911475	0.231876	-0.661965	0.539839	-0.207362	0.843225
ASPWEDRAFT_169781	AN7823, AN7924		peroxidase activity	1.27395	0.0356795	0.575953	0.374444	-0.232087	0.780092	4.3652	1.34e-06	3.6059	6.12e-05	3.18206	0.000981136	-2.95788	0.00239573	0.133366	0.865158	0.0720635	0.948545	0.456259	0.660942
ASPWEDRAFT_38834		trxA	protein-disulfide reductase activity	-0.142522	0.696992	0.0518821	0.886356	-1.49765	2.29477e-07	-0.936736	0.00165229	-0.113812	0.753312	-0.891541	0.00316792	0.776707	0.0150859	-0.0175069	0.967832	0.611013	0.0740955	1.38282	4.4098e-06
ASPWEDRAFT_139887	AN0170	trxA	protein-disulfide reductase activity	2.8393	1.72e-12	1.89596	3.06e-06	2.03174	1.68e-06	0.809644	0.085443	0.597609	0.20554	0.908648	0.0555203	-0.201967	0.753742	-2.23162	1.33e-07	-1.50032	0.00102408	-1.32506	0.00565246
ASPWEDRAFT_169564	AN0170	trxA	protein-disulfide reductase activity	1.20789	0.545231	2.44811	0.131613	1.60299	0.425274	-0.0477962	0.979642	2.0769	0.0899349	-1.8463	0.369064	2.23068	0.264908	0.974992	0.577716	1.85947	0.169489	-1.2186	0.666405
ASPWEDRAFT_101045	AN0170	trxA	protein-disulfide reductase activity	-0.0533309	0.83919	-0.543635	0.00574083	0.453853	0.0339027	0.0236836	0.930621	-0.623482	0.0016995	0.0847895	0.75288	0.451647	0.0447516	0.528661	0.0109501	0.371799	0.121471	0.0825831	0.808604
ASPWEDRAFT_161658	AN0170	trxA	protein-disulfide reductase activity	0.702642	0.121103	0.662073	0.130415	0.11536	0.841141	0.0676128	0.904795	-0.0158266	0.980035	0.738721	0.113669	-0.25446	0.675213	-0.88949	0.0489464	-0.93236	0.0578191	0.368901	0.557582
ASPWEDRAFT_35627	AN0170	trxA	protein-disulfide reductase activity	-0.386714	0.161881	-0.266259	0.335367	0.230461	0.452909	-0.0574533	0.862502	-0.519912	0.0499128	0.439587	0.120528	0.187934	0.595856	0.517195	0.0601636	-0.0657183	0.882886	0.39706	0.232962
ASPWEDRAFT_293907	AN0170	trxA	protein-disulfide reductase activity	4.75624	0.0078903	6.66276	5.68e-05	0	1	2.78771	0.164675	3.77147	0.0365766	0.601535	0.842627	1.60701	0.591034	-0.361525	0.841218	-1.28428	0.412387	1.57943	0.635228
ASPWEDRAFT_166503	AN3581	trxR	thioredoxin-disulfide reductase activity	1.46227	0.000985806	1.17231	0.00761758	-0.962088	0.0456251	1.12846	0.014908	1.79477	3.58e-05	1.29856	0.00494371	-0.0428199	0.955711	-0.376628	0.48123	0.579648	0.313005	2.21783	1.1e-06
ASPWEDRAFT_22524	AN3687, AN8080, AN8692	(prxA)	thioredoxin peroxidase activity	-0.405295	0.204954	-0.138716	0.686233	0.153861	0.681352	0.353858	0.285527	0.0241182	0.953977	0.732371	0.0180497	-0.420516	0.243984	0.338637	0.313761	-0.257681	0.533235	0.157995	0.741925
ASPWEDRAFT_174151	AN3687, AN8080, AN8692	(prxA)	thioredoxin peroxidase activity	0.474817	0.0197282	-0.0561492	0.816659	0.992934	3.92e-07	0.866711	1.1e-05	0.253225	0.240842	1.27251	3.47e-11	-0.376189	0.103555	0.0157039	0.957419	-0.0668156	0.837843	-0.0966161	0.768196
ASPWEDRAFT_126499	AN3687, AN8080, AN8692	prxA	thioredoxin peroxidase activity	-0.379568	0.303115	0.0451145	0.914087	-0.839362	0.016769	-0.647218	0.0659567	-0.246554	0.519517	-0.463398	0.215873	0.900343	0.0122059	0.632693	0.0752808	0.608674	0.124589	1.27631	0.000288537
ASPWEDRAFT_49041	AN3973, AN10223	tpxA (tpxB)	peroxiredoxin activity	-0.148098	0.819201	0.054721	0.931251	0.364313	0.551617	0.47323	0.412626	-0.299703	0.613521	0.547985	0.34984	-0.362081	0.601135	0.259246	0.682509	-0.716505	0.256627	-0.178409	0.836558
ASPWEDRAFT_167024	AN3973, AN10223	(tpxA) tpxB	peroxiredoxin activity	-0.097253	0.892552	-0.238455	0.710895	0.828535	0.177056	-0.225108	0.738269	-1.13645	0.042809	-0.0568815	0.944195	1.71239	0.00306462	1.58454	0.00486277	0.8144	0.232993	0.826977	0.244741
ASPWEDRAFT_472038	AN4023, AN5232		peroxiredoxin activity	-0.426717	0.19107	-0.65535	0.0302012	0.493524	0.13679	-0.494086	0.129751	-0.959267	0.00128274	-0.183493	0.630438	0.8277	0.0101213	0.76033	0.0158705	0.523783	0.157716	0.150682	0.761212
ASPWEDRAFT_37280	AN4023, AN5232		peroxiredoxin activity	0.554101	0.339824	0.808476	0.128652	1.14201	0.0395558	1.65743	0.00193266	0.861794	0.123025	1.90181	0.000362441	-0.214651	0.787468	0.888678	0.110967	-0.161332	0.850472	0.545145	0.45408
ASPWEDRAFT_36552	AN1252		peroxiredoxin activity	-0.499424	0.224012	-0.989535	0.00816759	-0.473628	0.276133	0.179111	0.732664	0.848911	0.0444929	0.702302	0.131765	-2.2047	1.75e-08	-1.52617	0.000182671	-0.366255	0.500904	-1.02877	0.0267578
ASPWEDRAFT_119062	AN1252		peroxiredoxin activity	-0.205569	0.698447	0.212278	0.666624	-0.808964	0.0849685	-0.292776	0.5722	0.447309	0.349772	-0.523026	0.305824	-0.624197	0.234523	-0.711405	0.132804	-0.389166	0.513267	-0.338259	0.615451
ASPWEDRAFT_37448	AN1252		peroxiredoxin activity	-1.20006	0.0521205	-0.378932	0.564445	-1.29398	0.0461791	-0.845308	0.183225	-0.930208	0.12608	-1.15346	0.068147	1.21437	0.0624576	1.56912	0.0110436	0.663098	0.393101	1.3549	0.0641069
ASPWEDRAFT_39921	AN0932	glrA	glutathione-disulfide reductase (NADPH) activity	0.66994	0.0265789	0.485145	0.105139	0.597637	0.0596456	0.78756	0.00905755	0.528786	0.0827334	0.775738	0.0111526	0.286593	0.45852	0.404213	0.216255	0.330234	0.395386	0.464695	0.218544
ASPWEDRAFT_104530	AN2846	gpxA	glutathione peroxidase activity	0.642888	0.0350902	0.888979	0.00190592	-0.558434	0.0823691	0.110632	0.761379	0.582081	0.0547154	0.11544	0.773189	0.619732	0.0641162	0.0874754	0.824934	0.312834	0.427521	1.29361	2.26e-05
ASPWEDRAFT_106588	AN4905		glutathione peroxidase activity	0.13069	0.662226	-0.185314	0.493502	-0.56004	0.0311228	-0.322806	0.233172	0.220504	0.422684	-0.168342	0.581744	-0.159789	0.641391	-0.613285	0.0155124	0.24603	0.45664	0.23191	0.511274
ASPWEDRAFT_100806	AN4905		glutathione peroxidase activity	0.348442	0.223933	0.51796	0.0498908	-0.481232	0.0947464	0.299355	0.314633	0.909088	0.00043336	0.421182	0.149022	-0.292692	0.387471	-0.34178	0.247315	0.0984366	0.818656	0.609722	0.0494972
ASPWEDRAFT_119830	AN4905		glutathione peroxidase activity	0.164395	0.957931	2.89471	NA	-0.332678	NA	2.89865	NA	3.15293	0.133885	-0.36025	NA	0.645201	NA	3.37946	0.124481	0.90342	0.714958	0	NA
ASPWEDRAFT_139874	AN4905		glutathione peroxidase activity	0.0704455	0.871597	0.819867	0.0107953	0.271399	0.49485	0.0727248	0.866817	-0.184053	0.646542	-0.196408	0.653177	-0.0571175	0.918399	-0.0548382	0.905119	-1.06104	0.0029159	-0.524925	0.232158
ASPWEDRAFT_620702	AN4905		glutathione peroxidase activity	-0.0830797	0.908592	1.3132	0.0149496	1.15442	0.0501236	0.75198	0.217808	-0.306723	0.642864	0.904178	0.138354	-0.179133	0.833469	0.655927	0.293488	-1.79905	0.00234808	-0.429373	0.604472
ASPWEDRAFT_643090	AN4905		glutathione peroxidase activity	-0.772241	0.0407304	-0.0055245	0.990894	-0.618399	0.12259	-0.73131	0.0568227	-0.690123	0.0659182	-0.182376	0.701348	0.214873	0.678582	0.255803	0.563485	-0.469726	0.313973	0.650896	0.151628
ASPWEDRAFT_108440	AN4215		glutathione disulfide oxidoreductase activity	-0.31176	0.329284	0.298046	0.331565	-0.512167	0.102623	-0.597377	0.047564	-0.0872295	0.807782	-0.237691	0.495931	0.53744	0.106067	0.251823	0.458	0.152165	0.729865	0.811916	0.0119377
ASPWEDRAFT_36290	AN4215		glutathione disulfide oxidoreductase activity	-0.0387254	0.892552	0.222709	0.341648	0.348045	0.151079	0.0230051	0.93856	0.145854	0.570046	0.210644	0.425389	-0.166652	0.577475	-0.104922	0.708837	-0.243508	0.402983	-0.304054	0.29854
ASPWEDRAFT_32125	AN7567		glutathione disulfide oxidoreductase activity	0.162967	0.667772	0.709814	0.020283	0.3155	0.385374	0.706258	0.0285959	0.484991	0.137682	0.65897	0.0459301	0.0158811	0.976853	0.559172	0.09304	-0.208942	0.648262	0.359351	0.400041
ASPWEDRAFT_169430	AN7567		glutathione disulfide oxidoreductase activity	0.0921035	0.944115	-0.607884	0.616789	-0.248259	0.866329	-0.16788	0.912162	0.440324	0.738751	0.973283	0.452009	-0.135761	0.940399	-0.395744	0.785755	0.912447	0.553159	1.08578	0.485346
ASPWEDRAFT_53567	AN5831, AN10379		glutathione transferase activity	-1.88942	9.13e-08	-3.64963	7.75e-27	-2.62876	1.19e-13	-0.524836	0.207397	-0.431098	0.293988	-0.0432223	0.938343	-2.95192	3.95e-17	-1.58734	2.39e-05	0.266611	0.630321	-0.366387	0.498577
ASPWEDRAFT_22967	AN5831, AN10379		glutathione transferase activity	1.61429	3.48e-05	-0.616264	0.137127	0.810108	0.0622765	0.700781	0.109512	0.682157	0.108732	0.869176	0.0452352	-0.873476	0.0559962	-1.78699	8.58e-06	0.424944	0.433657	-0.814408	0.0958407
With all genes
(Gene set without glutathione, thioredoxin, glutaredox system genes)
Behavior		Subgroup		No. genes	p-value	No. genes	p-value	No. genes	p-value	No. genes	p-value	No. genes	p-value	No. genes	p-value	No. genes	p-value	No. genes	p-value	No. genes	p-value	No. genes	p-value
downregulated in the	group	DEG; log2FC < 0		1	0.949445	0	1	3	0.466351	1	0.951708	1	0.952658	1	0.93835	1	0.875559	5	0.1856	0	1	1	0.745121
downregulated in the	group	DEG; log2FC < -1		1	0.711224	0	1	3	0.129109	1	0.728854	1	0.683184	0	1	1	0.794131	5	0.0555602	0	1	1	0.630873
downregulated in the	group	DEG; log2FC < -2		0	1	0	1	2	0.0592096	0	1	0	1	0	1	1	0.513442	2	0.250099	0	1	0	1
upregulated in the	group	DEG; log2FC > 0		7	0.0381393	7	0.0816783	3	0.411487	6	0.0418678	5	0.36615	5	0.100785	1	0.827017	1	0.92589	1	0.843336	5	0.00586701
upregulated in the	group	DEG; log2FC > 1		7	0.00811411	5	0.186058	3	0.186156	5	0.0276364	5	0.164654	4	0.0741146	1	0.569399	1	0.717088	1	0.581855	5	0.000253469
upregulated in the	group	DEG; log2FC > 2		2	0.328434	2	0.442477	0	1	3	0.0178022	5	0.0117307	2	0.0701748	0	1	0	1	0	1	4	8.74083e-06
all genes in the	group			16		16		16		16		16		16		16		16		16		16
(Gene set including glutathione, thioredoxin, glutaredox system genes)
Behavior		Subgroup		No. genes	p-value	No. genes	p-value	No. genes	p-value	No. genes	p-value	No. genes	p-value	No. genes	p-value	No. genes	p-value	No. genes	p-value	No. genes	p-value	No. genes	p-value
downregulated in the	group	DEG; log2FC < 0		3	0.992515	3	0.999294	9	0.330302	3	0.993278	5	0.936495	2	0.997646	3	0.943309	11	0.324944	3	0.84654	3	0.76416
downregulated in the	group	DEG; log2FC < -1		2	0.882869	1	0.997719	6	0.178727	1	0.980168	2	0.854788	0	1	3	0.841913	9	0.198089	3	0.621031	3	0.560178
downregulated in the	group	DEG; log2FC < -2		0	1	1	0.734174	2	0.337737	0	1	0	1	0	1	3	0.354292	3	0.55836	0	1	0	1
upregulated in the	group	DEG; log2FC > 0		13	0.215868	15	0.206545	7	0.548803	11	0.184951	9	0.87827	12	0.0743413	5	0.566253	5	0.866112	1	0.996183	11	0.000898664
upregulated in the	group	DEG; log2FC > 1		11	0.136186	9	0.608109	5	0.476651	7	0.297053	7	0.820015	7	0.219064	2	0.713196	3	0.716041	1	0.927138	8	0.000440173
upregulated in the	group	DEG; log2FC > 2		4	0.469277	3	0.832756	1	0.706942	3	0.243838	6	0.272465	2	0.381844	0	1	0	1	0	1	5	5.50398e-05
all genes in the	group			48		48		48		48		48		48		48		48		48		48
With the "best hits" only
(Gene set without glutathione, thioredoxin, glutaredox system genes)
Behavior		Subgroup		No. genes	p-value	No. genes	p-value	No. genes	p-value	No. genes	p-value	No. genes	p-value	No. genes	p-value	No. genes	p-value	No. genes	p-value	No. genes	p-value	No. genes	p-value
downregulated in the	group	DEG; log2FC < 0		1	0.845096	0	1	2	0.477983	1	0.849464	0	1	1	0.824651	0	1	4	0.111413	0	1	1	0.574352
downregulated in the	group	DEG; log2FC < -1		1	0.539814	0	1	2	0.185881	1	0.557576	0	1	0	1	0	1	4	0.0363059	0	1	1	0.463523
downregulated in the	group	DEG; log2FC < -2		0	1	0	1	2	0.0244863	0	1	0	1	0	1	0	1	1	0.46262	0	1	0	1
upregulated in the	group	DEG; log2FC > 0		4	0.148103	5	0.0798344	1	0.78912	3	0.236081	2	0.75381	2	0.495552	0	1	1	0.803277	0	1	3	0.0368618
upregulated in the	group	DEG; log2FC > 1		4	0.0618153	4	0.11168	1	0.628171	2	0.314957	2	0.584207	1	0.662054	0	1	1	0.545675	0	1	3	0.00554679
upregulated in the	group	DEG; log2FC > 2		1	0.531893	1	0.620642	0	1	1	0.304345	2	0.230751	0	1	0	1	0	1	0	1	2	0.00316014
all genes in the	group			10		10		10		10		10		10		10		10		10		10
(Gene set including glutathione, thioredoxin, glutaredox system genes)
Behavior		Subgroup		No. genes	p-value	No. genes	p-value	No. genes	p-value	No. genes	p-value	No. genes	p-value	No. genes	p-value	No. genes	p-value	No. genes	p-value	No. genes	p-value	No. genes	p-value
downregulated in the	group	DEG; log2FC < 0		2	0.957578	1	0.91588	7	0.000173291	3	0.868357	2	0.539007	2	0.491045	2	0.858796	8	6.27369e-05	0	1	2	0.660575
downregulated in the	group	DEG; log2FC < -1		2	0.609049	1	0.717841	4	0.00564089	2	0.63576	1	0.51238	0	1	2	0.735861	7	7.01307e-05	0	1	2	0.491008
downregulated in the	group	DEG; log2FC < -2		0	1	1	0.240886	3	0.00162294	0	1	0	1	0	1	2	0.334588	1	0.46262	0	1	0	1
upregulated in the	group	DEG; log2FC > 0		8	0.207365	8	0.000432564	3	0.164618	8	0.0758636	4	0.221707	9	6.12476e-07	4	0.30585	3	0.179768	0	1	8	0.000740789
upregulated in the	group	DEG; log2FC > 1		6	0.257819	5	0.0293783	2	0.241349	4	0.365397	3	0.283703	4	0.0140344	1	0.758884	2	0.172577	0	1	7	5.42519e-05
upregulated in the	group	DEG; log2FC > 2		1	0.87138	1	0.620642	0	1	1	0.624878	2	0.230751	0	1	0	1	0	1	0	1	3	0.00156264
all genes in the	group			27		27		27		27		27		27		27		27		27		27
downregulated in the	genome	DEG; log2FC < 0		2153		2775		1976		2183		2196		2022		1545		2463		1201		1036
downregulated in the	genome	DEG; log2FC < -1		945		1504		1006		991		877		983		1190		1722		834		764
downregulated in the	genome	DEG; log2FC < -2		204		344		316		198		102		232		557		762		268		319
upregulated in the	genome	DEG; log2FC > 0		2718		3184		1824		2161		3152		2038		1314		1899		1384		981
upregulated in the	genome	DEG; log2FC > 1		2031		2465		1192		1432		2369		1301		649		960		671		487
upregulated in the	genome	DEG; log2FC > 2		925		1169		319		451		1157		348		151		210		150		109
all genes in the	genome			12659		12659		12659		12659		12659		12659		12659		12659		12659		12659

## Sheet: glycerol metabolism
"Glycerol metabolism" genes
In the case of the A. wentii orthologues, best hits are marked with bold letters.
A. nidulans
GENE ID	Gene name	Description (FungiDB)		A. nidulans THS30						A. nidulans DgfdB						A. nidulans THS30 vs. DgfdB
				Sorbitol		NaCl		NaCl + Sorbitol		Sorbitol		NaCl		NaCl + Sorbitol		Untreated		Sorbitol		NaCl		NaCl + Sorbitol
				log2FoldChange	padj	log2FoldChange	padj	log2FoldChange	padj	log2FoldChange	padj	log2FoldChange	padj	log2FoldChange	padj	log2FoldChange	padj	log2FoldChange	padj	log2FoldChange	padj	log2FoldChange	padj
AN2864		Ortholog(s) have glycerol-3-phosphate transmembrane transporter activity, glycerophosphodiester transmembrane transporter activity and role in glycerol-3-phosphate transport, glycerophosphodiester transport, transmembrane transport		2.29258	1.00209e-20	1.4449	1.5182e-08	1.0972	3.62248e-05	2.05664	9.8969e-18	0.978471	0.00013554	0.831065	0.00173942	0.501002	0.171717	0.265057	0.344542	0.0345777	0.949625	0.234865	0.570728
AN9168		Ortholog(s) have solute:proton symporter activity, role in glycerol transport, transmembrane transport and plasma membrane localization		3.85092	4.61613e-46	5.32286	7.52144e-88	0.78368	0.0069864	5.08977	1.7631e-79	6.09692	2.96509e-114	1.753	4.10847e-10	-1.00455	0.00215742	0.234293	0.525222	-0.230487	0.618951	-0.0352374	0.956462
AN5589	gcnA	glycerol kinase		1.67676	1.36102e-17	2.91804	1.63054e-51	0.605114	0.00374566	1.51391	1.28759e-14	2.63227	3.66831e-42	0.412339	0.0608261	0.362194	0.18548	0.199343	0.441159	0.0764273	0.850893	0.169419	0.629431
AN1216	gppA	Putative glycerol-3-phosphate phosphatase		0.662772	4.69233e-05	0.208736	0.232486	0.012726	0.953332	1.1007	6.21493e-12	0.550416	0.000832005	0.169293	0.382836	-0.145751	0.566697	0.292178	0.127538	0.19593	0.428293	0.0108163	0.978325
AN0351	gfdA	Glycerol-3-phosphate dehydrogenase [NAD+]		0.10675	0.513642	0.787156	4.02818e-09	-0.338469	0.0188296	0.163432	0.27082	0.851898	2.1463e-10	-0.377398	0.00966741	-0.051814	0.833423	0.00486723	0.983338	0.0129282	0.96829	-0.0907427	0.723358
AN6792	gfdB	Glycerol-3-phosphate dehydrogenase [NAD+], putative		4.02274	2.13213e-54	5.84039	9.2868e-115	0.18635	0.574024
AN1396		Putative FAD dependent glycerol 3-phosphate dehydrogenase with a predicted role in glycerol metabolism		1.48918	4.60606e-11	1.79889	8.45854e-16	0.479735	0.0500054	1.26844	2.20625e-08	1.42865	2.19679e-10	0.0256378	0.940517	0.370051	0.24406	0.149316	0.637163	-0.000192985	0.99972	-0.084047	0.854813
AN1274		Ortholog(s) have alditol:NADP+ 1-oxidoreductase activity, glycerol dehydrogenase [NAD(P)+] activity, mRNA binding activity and role in D-xylose catabolic process, arabinose catabolic process, cellular response to oxidative stress		0.197251	0.0177543	0.872975	1.54162e-29	0.0427605	0.660769	0.0102733	0.91973	0.733357	2.20375e-20	0.0639847	0.52689	-0.219692	0.029185	-0.406669	3.16439e-06	-0.35931	7.35393e-05	-0.198468	0.0694924
AN7193		Putative NADP-dependent glycerol dehydrogenase with a predicted role in carbohydrate metabolism		-0.885415	4.14344e-08	1.28638	3.32533e-16	-0.701967	2.11575e-05	-0.729396	8.93115e-06	1.2016	3.97568e-14	-0.630257	0.000198316	-0.443369	0.0276162	-0.28735	0.143615	-0.528148	0.00653137	-0.37166	0.098094
AN11030		Putative NADP-coupled glycerol dehydrogenase		2.24383	0.345544	-0.872412	0.762413	2.56675	NA	-1.80628	NA	0.0840169	0.980316	-1.09492	0.703743	1.39349	NA	-2.65662	NA	2.34992	NA	-2.26818	NA
Behavior		Subgroup		No. genes	p-value	No. genes	p-value	No. genes	p-value	No. genes	p-value	No. genes	p-value	No. genes	p-value	No. genes	p-value	No. genes	p-value	No. genes	p-value	No. genes	p-value
downregulated in the	group	DEG; log2FC < 0		1	0.963848	0	1	2	0.785842	1	0.958827	0	1	2	0.71965	3	0.0181277	1	0.77961	2	0.106751	0	1
downregulated in the	group	DEG; log2FC < -1		0	1	0	1	0	1	0	1	0	1	0	1	1	0.0394403	0	1	0	1	0	1
downregulated in the	group	DEG; log2FC < -2		0	1	0	1	0	1	0	1	0	1	0	1	0	1	0	1	0	1	0	1
upregulated in the	group	DEG; log2FC > 0		7	0.0108226	8	0.00263777	3	0.467595	5	0.0995689	8	0.000601744	2	0.613952	0	1	0	1	0	1	0	1
upregulated in the	group	DEG; log2FC > 1		5	0.0080188	6	0.0041366	1	0.544674	5	0.0048588	4	0.0552286	1	0.422474	0	1	0	1	0	1	0	1
upregulated in the	group	DEG; log2FC > 2		3	0.0151003	3	0.0536955	0	1	2	0.0710512	2	0.151275	0	1	0	1	0	1	0	1	0	1
all genes in the	group			10		10		10		9		9		9		9		9		9		9
downregulated in the	genome	DEG; log2FC < 0		3103		3508		2899		3278		3443		2840		730		1699		694		576
downregulated in the	genome	DEG; log2FC < -1		1031		1530		687		1255		1538		638		49		161		106		59
downregulated in the	genome	DEG; log2FC < -2		162		288		128		231		300		107		12		32		33		16
upregulated in the	genome	DEG; log2FC > 0		3310		3537		2722		3304		3444		2386		993		1842		973		708
upregulated in the	genome	DEG; log2FC > 1		1572		2025		831		1596		1913		650		202		257		109		144
upregulated in the	genome	DEG; log2FC > 2		608		987		168		549		855		141		22		39		21		19
all genes in the	genome			10988		10988		10988		10988		10988		10988		10988		10988		10988		10988
A. wentii
Gene ID	A. nidulans orthologue			A. wentii CBS141173						A. wentii 'c gfdB						A. wentii CBS141173 vs. 'c gfdB
				Sorbitol		NaCl		NaCl + Sorbitol		Sorbitol		NaCl		NaCl + Sorbitol		Untreated		Sorbitol		NaCl		NaCl + Sorbitol
	Gene ID	Gene name	Description	log2FoldChange	padj	log2FoldChange	padj	log2FoldChange	padj	log2FoldChange	padj	log2FoldChange	padj	log2FoldChange	padj	log2FoldChange	padj	log2FoldChange	padj	log2FoldChange	padj	log2FoldChange	padj
ASPWEDRAFT_115153	AN2864		glycerol-3-phosphate transmembrane transporter	-1.29445	0.00275587	-0.531354	0.242998	0.407699	0.425751	0.390685	0.433287	-0.603827	0.191428	0.85221	0.0673853	-0.0284363	0.970022	1.65669	0.000144071	-0.100909	0.89441	0.416075	0.503722
ASPWEDRAFT_53485	AN2864		glycerol-3-phosphate transmembrane transporter	0.920423	0.123079	0.415527	0.510194	0.15795	0.838544	1.33207	0.149262	2.79656	0.000295626	1.39001	0.147239	-3.41072	1.11e-05	-2.99907	5.25e-06	-1.02969	0.145391	-2.17866	0.00444463
ASPWEDRAFT_121569	AN2864		glycerol-3-phosphate transmembrane transporter	0.583197	0.106675	0.155119	0.697868	1.05563	0.00270106	0.829803	0.019222	-0.108063	0.79997	1.07525	0.00207088	0.411905	0.341624	0.658512	0.0707802	0.148724	0.783307	0.431528	0.348422
ASPWEDRAFT_741393	AN2864		glycerol-3-phosphate transmembrane transporter	-0.0622223	0.9857	2.31712	NA	-0.996013	NA	1.33602	NA	2.62936	0.358116	-0.360266	NA	-0.979912	NA	0.418331	0.905672	-0.667676	0.860509	-0.344164	NA
ASPWEDRAFT_35932	AN9168		solute:proton symporter activity, role in glycerol transport	7.47964	1.26e-11	11.3977	1.41e-26	6.30429	3.79e-08	7.63006	7.02e-13	8.02619	9.66e-15	3.64951	0.00129657	2.44211	0.0727539	2.59254	0.0223854	-0.929431	0.543843	-0.21267	0.918408
ASPWEDRAFT_112163	AN9168		solute:proton symporter activity, role in glycerol transport	1.79326	0.0625093	4.51784	1.86e-07	-0.100435	0.941829	-2.31169	0.0154042	1.54971	0.107541	-3.99922	1.49e-05	1.36763	0.220945	-2.73732	0.00375151	-1.60049	0.148256	-2.53116	0.0163037
ASPWEDRAFT_110586	AN9168		solute:proton symporter activity, role in glycerol transport	5.55186	0.000545145	5.066	0.0014181	2.54819	0.209848	3.71072	0.0342446	4.34942	0.00831189	0.601526	0.837748	0.645221	0.842617	-1.19592	0.311775	-0.0713581	0.96916	-1.30144	0.636686
ASPWEDRAFT_134254	AN9168		solute:proton symporter activity, role in glycerol transport	1.77414	0.0152805	2.89321	1.67e-05	1.80788	0.018243	2.7229	5.91e-05	1.49214	0.0341305	2.4563	0.000394659	1.15967	0.193626	2.10843	0.00154805	-0.241394	0.820675	1.8081	0.0171408
ASPWEDRAFT_143956	AN9168		solute:proton symporter activity, role in glycerol transport	1.06105	NA	0.992974	NA	-0.332678	NA	0	NA	1.82016	NA	3.0463	NA	-0.316565	NA	-1.11766	NA	0.510622	NA	3.06241	NA
ASPWEDRAFT_172143	AN9168		solute:proton symporter activity, role in glycerol transport	-0.714572	0.0811725	-0.17427	0.702016	-0.108071	0.836767	-0.966649	0.0165495	-1.49833	7.73e-05	-0.670772	0.115986	0.958081	0.0250973	0.706004	0.0934517	-0.365978	0.496911	0.395381	0.478193
ASPWEDRAFT_173452	AN9168		solute:proton symporter activity, role in glycerol transport	1.15658	0.0585308	1.82891	0.000949485	1.46529	0.0188935	0.607541	0.384184	0.384495	0.588015	0.36774	0.653387	0.656115	0.421768	0.107079	0.891489	-0.7883	0.25271	-0.441435	0.633522
ASPWEDRAFT_174802	AN9168		solute:proton symporter activity, role in glycerol transport	3.22587	1.65e-12	4.56824	3.24e-25	0.517815	0.407801	3.48061	9.09e-12	4.75482	1.07e-22	0.530057	0.468006	-0.285446	0.728594	-0.0307124	0.962621	-0.0988696	0.897656	-0.273204	0.77365
ASPWEDRAFT_182739	AN9168		solute:proton symporter activity, role in glycerol transport	1.84234	0.00111291	-0.452612	0.525573	1.97566	0.000741312	1.91516	0.0118107	1.05612	0.1944	2.96803	3.46e-05	-1.29123	0.132608	-1.21841	0.0474859	0.217503	0.844342	-0.298853	0.74345
ASPWEDRAFT_43563	AN9168		solute:proton symporter activity, role in glycerol transport	2.55879	8.67e-06	1.71135	0.00401827	1.16067	0.0934516	1.49065	0.0350308	1.34146	0.0520546	0.620987	0.487917	-0.0442526	0.970983	-1.11239	0.0668657	-0.414147	0.62628	-0.583935	0.557836
ASPWEDRAFT_534313	AN9168		solute:proton symporter activity, role in glycerol transport	3.81169	1.07e-33	5.15799	2.03e-62	-0.316761	0.438126	1.89143	1.52e-08	4.27706	2.78e-42	-2.77583	2.91e-17	0.287905	0.533666	-1.63236	1.69e-06	-0.593028	0.151919	-2.17116	2.09e-10
ASPWEDRAFT_739303	AN9168		solute:proton symporter activity, role in glycerol transport	4.56581	0.00694408	5.40942	0.000767384	-0.332678	0.912501	0.801109	0.714283	1.60923	0.379484	-1.24222	0.625434	1.52717	0.577858	-2.23753	0.141772	-2.27302	0.105698	0	1
ASPWEDRAFT_47372	AN5589	gcnA	glycerol kinase	0.143244	0.615782	-0.67385	0.00349323	-0.332266	0.213291	-0.786533	0.000991471	-0.456306	0.0611726	-1.01811	1.55e-05	0.506852	0.0575718	-0.422925	0.0975374	0.724395	0.00465701	-0.178987	0.619199
ASPWEDRAFT_748248	AN5589	gcnA	glycerol kinase	0.419005	0.586961	-1.24556	0.0589344	-0.155539	0.861904	-0.277265	0.735492	0.764286	0.284959	-0.115075	0.905513	-0.740907	0.376862	-1.43718	0.0385142	1.26894	0.102436	-0.700443	0.456659
ASPWEDRAFT_104044	AN1216	gppA	glycerol-3-phosphate phosphatase	0.193816	0.357535	-0.206256	0.306106	0.918967	6.73e-07	0.847594	6.3e-06	0.260413	0.20248	0.705952	0.000247161	-0.165141	0.514807	0.488637	0.0121549	0.301528	0.196729	-0.378156	0.0994652
ASPWEDRAFT_673647	AN1216	gppA	glycerol-3-phosphate phosphatase	1.13707	0.116805	2.01942	0.00195626	-0.801286	0.392292	1.00348	0.239428	2.12131	0.00352884	0.0505042	0.969967	-0.329182	0.77037	-0.462778	0.586015	-0.227293	0.827619	0.522608	0.708794
ASPWEDRAFT_104967	AN0351, AN6792	gfdA, gfdB	Glycerol-3-phosphate dehydrogenase	3.13331	2.87e-25	3.41211	2.06e-30	0.339915	0.376003	1.07782	0.0011053	2.57579	2.34e-17	-0.183207	0.662993	0.633809	0.0933747	-1.42168	1.32e-05	-0.202508	0.682236	0.110687	0.846394
ASPWEDRAFT_24495	AN1396		FAD dependent glycerol 3-phosphate dehydrogenase	0.350087	0.288156	0.0360512	0.924263	0.207933	0.570808	-0.0298188	0.941081	-0.383631	0.233641	0.322424	0.355019	0.810551	0.0118588	0.430646	0.191714	0.390869	0.305927	0.925042	0.00503875
ASPWEDRAFT_45325	AN1274, AN7193, AN11030		NADP-coupled glycerol dehydrogenase	0.243316	0.882504	1.53906	0.197031	1.9005	NA	0.27334	NA	1.96409	0.23456	-0.279324	0.921184	-0.875382	0.699895	-0.845358	0.665605	-0.450352	0.795741	-3.0552	NA
ASPWEDRAFT_32407	AN1274, AN7193, AN11030		NADP-coupled glycerol dehydrogenase	0.675402	0.0974362	-0.104427	0.8247	0.945222	0.0204886	0.0465486	0.929144	-0.174237	0.711037	0.21282	0.667639	-0.301042	0.56576	-0.929896	0.0207634	-0.370852	0.48342	-1.03344	0.0186063
ASPWEDRAFT_45133	AN1274, AN7193, AN11030		NADP-coupled glycerol dehydrogenase	1.50545	0.00824332	1.00957	0.0768372	1.54464	0.00883111	0.64844	0.309075	0.534461	0.398372	0.857832	0.172991	-0.456854	0.550347	-1.31386	0.0262049	-0.931967	0.174974	-1.14366	0.0940854
ASPWEDRAFT_101237	AN1274, AN7193, AN11030		NADP-coupled glycerol dehydrogenase	0.951208	0.0153779	1.7855	8.39e-07	0.415731	0.359545	-0.0919519	0.853045	0.715451	0.0711511	-0.648682	0.133692	0.862133	0.0469331	-0.181027	0.713254	-0.207915	0.721683	-0.20228	0.754071
ASPWEDRAFT_101893	AN1274, AN7193, AN11030		NADP-coupled glycerol dehydrogenase	1.11266	1.17e-05	1.30786	1.14e-07	1.11742	1.96e-05	0.594918	0.0295161	1.04131	4.22e-05	0.476408	0.0952836	0.102334	0.795007	-0.415413	0.147031	-0.164215	0.679421	-0.53868	0.0889807
ASPWEDRAFT_104176	AN1274, AN7193, AN11030		NADP-coupled glycerol dehydrogenase	3.42713	5.74e-25	3.28241	2.43e-23	0.35799	0.425327	0.411817	0.351877	1.99192	1.76e-08	-0.591372	0.211503	0.102784	0.865412	-2.91252	1.77e-16	-1.1877	0.00140629	-0.846578	0.0932014
ASPWEDRAFT_108056	AN1274, AN7193, AN11030		NADP-coupled glycerol dehydrogenase	1.93746	3.82e-09	2.58546	4.27e-16	0.46383	0.248207	1.29019	0.000400675	1.92689	1.55e-08	0.589291	0.153434	-0.573308	0.187181	-1.22057	0.000504594	-1.23188	0.00066756	-0.447847	0.36446
ASPWEDRAFT_118731	AN1274, AN7193, AN11030		NADP-coupled glycerol dehydrogenase	2.95165	0.000642198	1.54213	0.0919234	2.96826	0.000970146	2.68017	0.00719123	2.22005	0.0251326	2.83158	0.00493304	-0.315985	0.842369	-0.58747	0.554287	0.361939	0.788266	-0.452666	0.734723
ASPWEDRAFT_147345	AN1274, AN7193, AN11030		NADP-coupled glycerol dehydrogenase	-0.302466	0.586647	-0.275823	0.600578	-0.184679	0.761318	0.168675	0.768927	-0.506752	0.321324	0.418757	0.452654	-0.0854717	0.911213	0.38567	0.488108	-0.316401	0.646492	0.517965	0.424067
ASPWEDRAFT_168638	AN1274, AN7193, AN11030		NADP-coupled glycerol dehydrogenase	-0.29699	0.835834	1.16611	0.296753	-0.724905	0.617214	-1.26144	0.507463	0.204019	0.906101	-1.00041	0.632152	-1.20579	0.450852	-2.17024	0.204101	-2.16788	0.118512	-1.4813	0.5261
ASPWEDRAFT_184430	AN1274, AN7193, AN11030		NADP-coupled glycerol dehydrogenase	0.318715	0.770813	0.800651	0.38342	-1.06555	0.383277	0.327609	0.799375	1.22516	0.234245	-1.55621	0.364573	-0.442914	0.753249	-0.43402	0.719887	-0.0184023	0.991877	-0.933572	0.696509
ASPWEDRAFT_22248	AN1274, AN7193, AN11030		NADP-coupled glycerol dehydrogenase	1.52466	0.0123678	3.28231	8.58e-10	0.565377	0.475248	1.89539	0.00412022	3.43536	4.05e-09	0.503844	0.585506	0.118806	0.918822	0.489541	0.445761	0.27186	0.708255	0.0572729	0.968889
ASPWEDRAFT_36695	AN1274, AN7193, AN11030		NADP-coupled glycerol dehydrogenase	0.436993	0.411535	1.07501	0.0202437	1.55643	0.00115288	1.21955	0.0112199	0.622412	0.214496	0.936999	0.0623437	0.790362	0.15557	1.57292	0.000885393	0.337766	0.619273	0.170932	0.832041
ASPWEDRAFT_37490	AN1274, AN7193, AN11030		NADP-coupled glycerol dehydrogenase	-0.168646	0.707566	-0.300183	0.452152	1.25091	0.000528476	0.613864	0.120055	-0.433958	0.286593	0.91556	0.0169181	0.0352662	0.955198	0.817777	0.0321088	-0.0985086	0.877942	-0.30008	0.570495
ASPWEDRAFT_69353	AN1274, AN7193, AN11030		NADP-coupled glycerol dehydrogenase	2.07418	0.0171429	2.63443	0.00130026	-0.249301	0.856204	0.578828	0.57884	1.41151	0.109838	0.502701	0.664206	0.862908	0.473679	-0.632444	0.522089	-0.360006	0.766738	1.61491	0.203413
With all genes
Behavior		Subgroup		No. genes	p-value	No. genes	p-value	No. genes	p-value	No. genes	p-value	No. genes	p-value	No. genes	p-value	No. genes	p-value	No. genes	p-value	No. genes	p-value	No. genes	p-value
downregulated in the	group	DEG; log2FC < 0		1	0.999001	1	0.999896	0	1	3	0.965988	1	0.999142	3	0.948948	1	0.99196	10	0.167866	2	0.878325	4	0.00402047
downregulated in the	group	DEG; log2FC < -1		1	0.943575	0	1	0	1	1	0.951231	1	0.930077	3	0.556329	1	0.97422	9	0.0557328	2	0.710491	4	0.00129859
downregulated in the	group	DEG; log2FC < -2		0	1	0	1	0	1	1	0.442409	0	1	2	0.147011	1	0.811252	3	0.386472	0	1	3	0.00118947
upregulated in the	group	DEG; log2FC > 0		17	0.000768675	17	0.00478746	12	0.00433606	15	0.000626206	13	0.107827	7	0.385638	3	0.753882	6	0.487399	1	0.9863	2	0.150273
upregulated in the	group	DEG; log2FC > 1		16	7.95801e-05	17	0.000229742	10	0.00172227	12	0.000518836	13	0.0134599	5	0.33023	0	1	4	0.307425	0	1	1	0.297553
upregulated in the	group	DEG; log2FC > 2		10	0.000233455	12	7.56559e-05	2	0.238994	5	0.00955466	9	0.00511166	4	0.0181464	0	1	2	0.125177	0	1	0	1
all genes in the	group			37		37		37		37		37		37		37		37		37		37
With the "best hits" only
Behavior		Subgroup		No. genes	p-value	No. genes	p-value	No. genes	p-value	No. genes	p-value	No. genes	p-value	No. genes	p-value	No. genes	p-value	No. genes	p-value	No. genes	p-value	No. genes	p-value
downregulated in the	group	DEG; log2FC < 0		1	0.813324	1	0.892241	0	1	1	0.818069	0	1	1	0.79129	0	1	3	0.247497	0	1	1	0.536383
downregulated in the	group	DEG; log2FC < -1		1	0.502661	0	1	0	1	0	1	0	1	1	0.516999	0	1	2	0.351721	0	1	1	0.42904
downregulated in the	group	DEG; log2FC < -2		0	1	0	1	0	1	0	1	0	1	0	1	0	1	0	1	0	1	0	1
upregulated in the	group	DEG; log2FC > 0		3	0.301279	2	0.703395	4	0.029603	3	0.187766	2	0.697329	2	0.438251	1	0.627177	3	0.140811	1	0.647384	1	0.516254
upregulated in the	group	DEG; log2FC > 1		3	0.16382	2	0.547769	2	0.205165	2	0.270861	2	0.524106	1	0.623313	0	1	2	0.145032	0	1	0	1
upregulated in the	group	DEG; log2FC > 2		2	0.136407	2	0.199015	1	0.205288	1	0.278626	2	0.19582	1	0.221945	0	1	1	0.139809	0	1	0	1
all genes in the	group			9		9		9		9		9		9		9		9		9		9
downregulated in the	genome	DEG; log2FC < 0		2153		2775		1976		2183		2196		2022		1545		2463		1201		1036
downregulated in the	genome	DEG; log2FC < -1		945		1504		1006		991		877		983		1190		1722		834		764
downregulated in the	genome	DEG; log2FC < -2		204		344		316		198		102		232		557		762		268		319
upregulated in the	genome	DEG; log2FC > 0		2718		3184		1824		2161		3152		2038		1314		1899		1384		981
upregulated in the	genome	DEG; log2FC > 1		2031		2465		1192		1432		2369		1301		649		960		671		487
upregulated in the	genome	DEG; log2FC > 2		925		1169		319		451		1157		348		151		210		150		109
all genes in the	genome			12659		12659		12659		12659		12659		12659		12659		12659		12659		12659
