# Supplementary material for: Aspergillus nidulans gfdB, Encoding the Hyperosmotic Stress Protein Glycerol-3-phosphate Dehydrogenase, Disrupts Osmoadaptation in Aspergillus wentii
Source: J Fungi (Basel). 2024 Apr 16;10(4):291. doi: 10.3390/jof10040291 (PMC11051529; doi:10.3390/jof10040291)
Supplement: Supplementary file 1 [file jof-10-00291-s001.zip › Table S5.xlsx]

## Sheet: Overwiev
Table S5	Transcriptional behavior of selected genes under the applied osmotic stress conditions
	Sheet 1	Genes showing upregulation or downregulation in the A. nidulans DgfdB (untreated) vs. A. nidulans THS30 (untreated) comparison
	Sheet 2	Genes showing upregulation or downregulation in the A. wentii 'c gfdB (untreated) vs. A. wentii CBS141173 (untreated) comparison
	Sheet 3	Results of the Fisher exact test (gene set enrichment analyses)

## Sheet: A. nidulans
GENE ID	A. nidulans DgfdB vs. A. nidulans THS30 (untreated)			Sorbitol vs. Untreated (A. nidulans THS30)			NaCl vs. Untreated (A. nidulans THS30)			NaCl + sorbitol vs. Untreated (A. nidulans THS30)			Sorbitol vs. Untreated (A. nidulans DgfdB)			NaCl vs. Untreated (A. nidulans DgfdB)			NaCl + sorbitol vs. Untreated (A. nidulans DgfdB)
	log2FoldChange	p-adj.	Regulation	log2FoldChange	p-adj.	Regulation	log2FoldChange	p-adj.	Regulation	log2FoldChange	p-adj.	Regulation	log2FoldChange	p-adj.	Regulation	log2FoldChange	p-adj.	Regulation	log2FoldChange	p-adj.	Regulation
AN9284	2.31965	0.0163096	upregulated	4.662	6.39381e-10	upregulated	5.92435	1.39705e-15	upregulated	2.18166	0.00836515	upregulated	2.37299	0.000143665	upregulated	3.71556	7.82253e-10	upregulated	0.0473653	0.960491
AN9188	3.68265	0.0357442	upregulated	5.97412	4.08189e-06	upregulated	7.93127	3.13631e-10	upregulated	3.753	0.00967694	upregulated	2.02822	0.00766003	upregulated	3.79279	2.34694e-08	upregulated	0.778307	0.427685
AN8956	2.93481	0.00338742	upregulated	5.57537	7.08515e-12	upregulated	5.03334	5.80229e-10	upregulated	6.71949	1.67821e-16	upregulated	5.14833	6.97856e-17	upregulated	3.29428	1.44302e-07	upregulated	4.99916	1.59108e-15	upregulated
AN8890	4.2682	0.0185859	upregulated	4.37832	0.00362878	upregulated	3.15476	0.0458195	upregulated	4.60705	0.00247349	upregulated	3.41893	3.44181e-05	upregulated	1.8389	0.0355719	upregulated	2.3942	0.00645705	upregulated
AN8417	1.38098	0.0245047	upregulated	4.21889	1.2317e-21	upregulated	5.85261	1.74146e-41	upregulated	2.77978	2.17159e-09	upregulated	2.52928	4.91169e-12	upregulated	4.23165	1.33787e-33	upregulated	1.8689	1.0854e-06	upregulated
AN8007	1.4225	0.00325825	upregulated	1.05401	0.0128339	upregulated	1.63234	5.8758e-05	upregulated	1.42273	0.000706577	upregulated	1.11352	0.00453062	upregulated	1.30487	0.000740445	upregulated	1.68403	1.5797e-05	upregulated
AN7716	1.49	0.0043736	upregulated	4.28921	2.60155e-24	upregulated	4.67858	5.15271e-29	upregulated	3.35309	5.81476e-15	upregulated	3.08034	3.61706e-14	upregulated	3.22443	1.66665e-15	upregulated	1.93439	5.1845e-06	upregulated
AN7011	1.3284	2.48563e-07	upregulated	2.26398	8.92601e-23	upregulated	2.57817	1.66132e-29	upregulated	1.42382	1.64001e-09	upregulated	1.00637	1.82758e-05	upregulated	1.73289	4.65949e-14	upregulated	0.12858	0.674279
AN6856	1.20407	0.0148804	upregulated	2.789	3.08876e-12	upregulated	5.47847	2.28595e-44	upregulated	1.14664	0.00679539	upregulated	1.51198	0.000204442	upregulated	4.07204	4.48662e-25	upregulated	0.297695	0.555483
AN5755	1.05684	1.47298e-14	upregulated	1.23294	8.29713e-22	upregulated	1.33299	1.46726e-25	upregulated	1.11809	7.84774e-18	upregulated	0.999737	6.99316e-15		0.83906	6.8308e-11		0.192663	0.195915
AN5634	1.378	2.03415e-06	upregulated	3.71646	1.13717e-48	upregulated	4.54504	5.63069e-73	upregulated	1.02547	0.000139836	upregulated	2.32343	2.53405e-20	upregulated	2.89423	4.34996e-31	upregulated	0.139378	0.680076
AN5303	1.07032	0.00104868	upregulated	1.25322	4.42241e-06	upregulated	1.51092	2.64492e-08	upregulated	1.66419	1.03607e-09	upregulated	0.610801	0.0213246		0.677776	0.00995558		0.246728	0.427253
AN4681	1.02139	0.0166449	upregulated	2.69748	3.81836e-16	upregulated	3.47888	1.87905e-26	upregulated	2.14432	2.86993e-10	upregulated	2.35859	1.08752e-13	upregulated	3.07232	9.50789e-23	upregulated	1.81948	2.7281e-08	upregulated
AN4586	1.39112	0.0329838	upregulated	4.33177	2.38815e-17	upregulated	3.08278	1.77608e-09	upregulated	2.75279	1.54853e-07	upregulated	3.37504	3.66487e-11	upregulated	1.87368	0.000318476	upregulated	1.29215	0.0201738	upregulated
AN2004	1.1658	3.55009e-17	upregulated	1.69581	3.85024e-40	upregulated	1.95924	1.72441e-53	upregulated	1.74016	2.30035e-41	upregulated	1.21777	2.2123e-22	upregulated	1.45904	6.99131e-32	upregulated	1.10758	3.1376e-18	upregulated
AN1997	1.26824	6.50861e-14	upregulated	4.19178	1.00208e-164	upregulated	3.04046	5.44466e-87	upregulated	1.8224	7.58564e-31	upregulated	2.77074	6.99044e-76	upregulated	2.23015	1.25465e-49	upregulated	0.59617	0.000245182
AN1547	1.98901	1.3958e-16	upregulated	4.37735	7.46839e-87	upregulated	6.0278	1.36802e-165	upregulated	1.10472	2.82488e-06	upregulated	2.53056	5.49009e-32	upregulated	4.0447	1.02299e-80	upregulated	0.144354	0.610439
AN1472	1.69507	3.93562e-09	upregulated	2.57352	4.32754e-23	upregulated	1.60266	1.21669e-09	upregulated	1.45028	7.56972e-08	upregulated	1.80841	1.07033e-12	upregulated	0.371117	0.184799		0.781918	0.0042062
AN1332	1.96502	0.00124894	upregulated	5.60677	3.41516e-33	upregulated	6.72622	5.83992e-48	upregulated	2.1676	3.31634e-05	upregulated	3.01843	2.31086e-21	upregulated	4.20797	2.4639e-42	upregulated	0.877196	0.0224074
AN12379	1.29789	0.000212774	upregulated	2.05735	7.76706e-13	upregulated	4.64066	8.66426e-65	upregulated	1.03259	0.00120435	upregulated	1.21287	2.43905e-06	upregulated	3.44418	2.26267e-48	upregulated	0.529453	0.0685477
AN12085	1.02313	7.13484e-11	upregulated	1.745	5.34658e-34	upregulated	3.30973	4.6481e-121	upregulated	1.22856	4.61815e-17	upregulated	1.14753	1.21984e-15	upregulated	2.34656	2.15292e-62	upregulated	0.655949	1.1905e-05
AN12077	1.44698	0.0449372	upregulated	2.64496	4.32692e-07	upregulated	2.3776	9.54923e-06	upregulated	1.31294	0.0301808	upregulated	1.36081	0.00134586	upregulated	0.770249	0.101789		-0.0643932	0.92743
AN12061	3.08448	0.0466929	upregulated	5.01834	2.28008e-05	upregulated	6.05411	1.78257e-07	upregulated	4.39097	0.000317386	upregulated	2.61269	3.09667e-05	upregulated	3.06967	5.91066e-07	upregulated	1.05495	0.158064
AN11574	2.09396	0.000406981	upregulated	1.58963	0.00241434	upregulated	1.23505	0.0279256	upregulated	1.83287	0.000570472	upregulated	1.16262	0.00120686	upregulated	1.31334	0.000208471	upregulated	1.14567	0.00173147	upregulated
AN10040	1.82543	0.000444822	upregulated	4.17683	1.65251e-23	upregulated	5.05039	2.48235e-34	upregulated	3.80714	3.35866e-19	upregulated	3.40693	5.289e-23	upregulated	3.6064	8.01267e-26	upregulated	2.6149	1.81799e-13	upregulated
AN0973	1.15571	0.0111307	upregulated	1.16538	0.00207723	upregulated	1.40375	0.000164093	upregulated	1.25587	0.00108617	upregulated	1.34628	0.000101781	upregulated	0.976588	0.00600599		1.15226	0.00137045	upregulated
AN0635	4.08254	0.00946392	upregulated	10.1184	2.3363e-16	upregulated	11.6833	1.11941e-21	upregulated	4.66554	0.000410669	upregulated	5.06537	8.589e-34	upregulated	7.25533	4.33193e-70	upregulated	0.0884793	0.916293
AN0230	2.56375	0.000369829	upregulated	3.0528	5.49206e-07	upregulated	2.41663	0.000119272	upregulated	1.90718	0.00404313	upregulated	1.51834	0.00087095	upregulated	0.827857	0.0903737		0.71998	0.165548
AN2398	1.45396	2.11483e-05	upregulated	1.88941	3.12859e-10	upregulated	3.13882	1.20983e-26	upregulated	-2.36018	1.51994e-11	downregulated	0.14054	0.686308		2.65455	2.97933e-20	upregulated	-2.21073	3.4988e-12	downregulated
AN9310	5.06609	0.000721434	upregulated	7.88856	3.64991e-10	upregulated	10.7182	4.65523e-18	upregulated	2.12162	0.182159		2.69119	1.57059e-11	upregulated	5.92716	6.00489e-56	upregulated	-0.823287	0.174141
AN9172	1.37658	0.000110592	upregulated	1.72253	1.59707e-08	upregulated	3.70564	5.30287e-37	upregulated	0.15163	0.70645		0.512581	0.0926316		2.25135	9.33015e-17	upregulated	0.696826	0.0227556
AN9163	1.19859	0.0465246	upregulated	2.09395	1.16621e-05	upregulated	4.30316	1.49036e-20	upregulated	-0.0241762	0.969658		0.494435	0.342591		2.95766	2.47144e-10	upregulated	-0.581652	0.293478
AN9123	1.04505	0.00107438	upregulated	2.13871	1.34807e-15	upregulated	3.84358	1.72346e-48	upregulated	0.315804	0.31325		0.846884	0.00203188		2.98911	1.63126e-30	upregulated	-0.000314934	upregulated
AN9010	2.16084	0.00133791	upregulated	2.93285	1.60261e-07	upregulated	2.70537	1.57969e-06	upregulated	-0.26561	0.747146		0.691405	0.17483		0.356293	0.523855		-2.02218	0.00103937	downregulated
AN8974	1.37513	0.00460256	upregulated	1.35168	0.0011607	upregulated	3.94633	1.69458e-23	upregulated	0.113781	0.825905		-0.143373	0.766821		2.38395	1.86594e-09	upregulated	-0.881975	0.0471631
AN8930	1.23757	0.0236217	upregulated	1.9497	1.01257e-05	upregulated	4.16634	1.55511e-22	upregulated	0.10118	0.858846		1.11145	0.0128943	upregulated	3.43364	4.52509e-16	upregulated	-0.444079	0.396311
AN8640	1.14551	0.012164	upregulated	3.92361	3.6631e-27	upregulated	5.67123	3.95528e-56	upregulated	0.265604	0.55371		2.68161	1.10129e-13	upregulated	4.55086	1.6408e-37	upregulated	-0.240064	0.612044
AN8637	1.85865	0.00020621	upregulated	4.42	2.71177e-25	upregulated	6.74453	5.12853e-58	upregulated	0.794219	0.0971852		2.48618	3.56776e-09	upregulated	5.19089	2.54195e-36	upregulated	0.0348268	0.956409
AN8612	1.28235	0.00260481	upregulated	3.06743	3.13172e-18	upregulated	4.49649	2.64511e-38	upregulated	0.49191	0.224521		2.67161	1.68439e-14	upregulated	5.04894	3.82275e-49	upregulated	0.42534	0.307423
AN8591	1.19701	0.00379343	upregulated	1.68259	1.42131e-06	upregulated	4.46097	7.83221e-40	upregulated	0.711305	0.0573854		1.17492	0.00084859	upregulated	3.42737	4.68988e-24	upregulated	-0.0491102	0.924376
AN8195	1.5583	0.00199575	upregulated	5.78113	1.20839e-51	upregulated	7.63027	2.22551e-90	upregulated	0.327294	0.55514		3.85929	3.686e-36	upregulated	6.25017	6.75666e-96	upregulated	0.464511	0.251332
AN8018	1.20387	1.99381e-08	upregulated	1.55854	7.82216e-16	upregulated	3.62655	1.34085e-82	upregulated	0.525424	0.012516		0.295545	0.153271		2.26321	2.54613e-34	upregulated	-0.265922	0.235936
AN7990	1.42623	0.00088718	upregulated	2.9317	1.04723e-16	upregulated	5.11109	1.74421e-49	upregulated	0.246717	0.590194		0.860525	0.0155179		3.79975	2.3755e-31	upregulated	-1.20519	0.00197496	downregulated
AN7989	1.174	0.0162688	upregulated	1.70602	2.06448e-05	upregulated	4.03069	1.63098e-25	upregulated	0.968068	0.0222014		0.499072	0.243298		3.28886	1.14931e-17	upregulated	-0.299605	0.544221
AN7960	1.82236	0.0124006	upregulated	3.96528	4.50085e-13	upregulated	6.29766	3.1163e-32	upregulated	-1.56045	0.126345		2.10981	3.10201e-07	upregulated	4.91603	6.70719e-38	upregulated	-0.0634945	0.928489
AN7959	1.64774	0.0130987	upregulated	3.24983	1.13075e-10	upregulated	5.72794	4.64585e-32	upregulated	-1.67415	0.0630982		1.63275	7.78847e-05	upregulated	4.47565	1.07125e-32	upregulated	-0.363649	0.534072
AN7607	1.82403	1.63875e-08	upregulated	4.60894	6.40713e-60	upregulated	4.00643	1.25438e-45	upregulated	0.372932	0.290045		2.44869	1.2076e-20	upregulated	1.36862	3.78803e-07	upregulated	-0.772456	0.0113863
AN6633	1.18359	2.35148e-05	upregulated	3.34283	4.51605e-43	upregulated	5.57464	6.38152e-119	upregulated	0.991081	0.000102062		2.41033	4.50529e-23	upregulated	4.33026	3.02477e-72	upregulated	0.63463	0.017609
AN6398	1.61504	8.88822e-06	upregulated	1.92453	2.08734e-09	upregulated	4.60032	1.1482e-49	upregulated	-0.74079	0.0471572		-0.190968	0.598445		3.06265	1.9267e-24	upregulated	-1.45094	1.66472e-05	downregulated
AN6367	1.15111	0.000453224	upregulated	1.98822	1.39305e-12	upregulated	2.53414	5.83083e-20	upregulated	-0.147731	0.669764		1.31553	3.3011e-06	upregulated	1.43436	3.27212e-07	upregulated	-0.791407	0.00892624
AN5768	1.02718	6.91625e-06	upregulated	2.3553	4.0925e-32	upregulated	3.46765	4.13461e-69	upregulated	0.640364	0.00274735		1.57193	3.421e-15	upregulated	2.63246	7.99868e-41	upregulated	0.119822	0.649125
AN5488	1.12638	6.5527e-09	upregulated	2.57275	1.44047e-49	upregulated	5.47193	8.09114e-224	upregulated	0.544293	0.00386811		2.03814	2.17476e-32	upregulated	4.80164	4.24252e-177	upregulated	0.373533	0.0547609
AN5339	1.20898	0.00506288	upregulated	2.07393	7.49295e-09	upregulated	4.48947	9.26747e-38	upregulated	0.623147	0.115039		0.934712	0.0113805		3.39735	2.31904e-22	upregulated	-0.0771364	0.883109
AN5338	1.20355	0.0245339	upregulated	1.60278	0.000255544	upregulated	3.63908	5.86334e-18	upregulated	0.104054	0.850569		0.702338	0.124695		2.48462	5.0155e-09	upregulated	-0.653884	0.182349
AN5017	1.42344	0.00825348	upregulated	3.26084	1.40159e-13	upregulated	5.5577	1.20381e-37	upregulated	0.689568	0.163045		1.52502	0.000707672	upregulated	4.38216	4.8373e-24	upregulated	-0.0322346	0.960491
AN4615	1.11148	2.36437e-07	upregulated	2.1016	7.27582e-28	upregulated	4.18108	4.19832e-108	upregulated	0.541805	0.00861626		1.20334	5.19607e-10	upregulated	3.01704	4.60163e-57	upregulated	0.230319	0.316416
AN4241	1.41616	0.000449878	upregulated	1.70086	1.04931e-06	upregulated	2.47565	3.76211e-13	upregulated	0.695747	0.06631		0.973415	0.00539593		1.08774	0.0016879	upregulated	-0.339579	0.411945
AN4148	1.04634	0.000675652	upregulated	2.142	2.29619e-16	upregulated	3.41957	2.61286e-40	upregulated	0.291872	0.333831		1.81672	3.65282e-12	upregulated	2.91431	1.37037e-29	upregulated	-0.350661	0.252351
AN3848	1.15002	0.0456759	upregulated	2.82156	3.54464e-10	upregulated	4.26301	5.09909e-22	upregulated	0.776651	0.11747		1.73659	0.000138055	upregulated	3.03969	8.11567e-12	upregulated	0.0471983	0.944325
AN3314	1.83059	0.00427878	upregulated	3.22868	6.30827e-10	upregulated	5.25972	5.32682e-25	upregulated	0.535569	0.405827		1.16771	0.0210363	upregulated	3.81417	4.57223e-16	upregulated	-0.70925	0.228922
AN2894	1.58356	0.0182444	upregulated	3.51483	7.965e-11	upregulated	6.10005	1.29109e-30	upregulated	-0.881218	0.145313		1.25877	0.0256133	upregulated	4.41515	1.07188e-16	upregulated	-0.974314	0.109396
AN2792	1.57759	0.0016448	upregulated	2.39683	1.63732e-08	upregulated	5.0183	6.40155e-34	upregulated	0.520998	0.281965		0.278269	0.562976		3.05432	1.57921e-13	upregulated	-0.612237	0.20782
AN2535	1.26459	3.18234e-05	upregulated	1.73913	6.71214e-11	upregulated	4.35422	2.72815e-63	upregulated	0.60698	0.0359174		0.919461	0.000640676		3.36137	4.18618e-39	upregulated	-0.0342994	0.931768
AN2404	1.15246	0.0073942	upregulated	2.3907	1.49164e-11	upregulated	4.50484	1.83956e-38	upregulated	0.931144	0.0135706		1.13316	0.00183033	upregulated	3.41801	1.10959e-22	upregulated	0.452634	0.275523
AN11938	1.01301	0.000264499	upregulated	1.24767	1.96452e-07	upregulated	2.40193	5.8901e-25	upregulated	0.740009	0.00334905		0.368096	0.146991		2.15509	5.17032e-21	upregulated	0.519196	0.0444943
AN11321	1.16778	0.00635803	upregulated	2.64265	4.58691e-16	upregulated	1.99956	3.08281e-09	upregulated	0.935486	0.0134314		1.11383	0.000244212	upregulated	1.11815	0.000237253	upregulated	-0.335324	0.400022
AN11314	1.18757	0.000778364	upregulated	3.0753	1.56817e-25	upregulated	5.87271	2.20336e-91	upregulated	-0.0317055	0.938807		1.78355	1.15384e-09	upregulated	4.71869	1.51252e-61	upregulated	-0.0284589	0.949145
AN11016	1.71822	0.0317442	upregulated	2.8376	9.83131e-06	upregulated	5.51298	8.03738e-19	upregulated	-0.238297	0.765983		0.716814	0.298137		3.6339	5.04867e-09	upregulated	-1.00241	0.164737
AN10988	1.08988	0.00071153	upregulated	2.40688	2.65825e-19	upregulated	3.12725	3.47221e-32	upregulated	0.485356	0.111746		1.17236	1.2663e-05	upregulated	1.75183	2.50198e-11	upregulated	-0.478984	0.118892
AN10678	1.46364	0.0211738	upregulated	2.17201	2.8553e-05	upregulated	4.63323	2.69815e-20	upregulated	-0.28519	0.649587		0.556838	0.321995		3.22601	1.72421e-10	upregulated	-0.755496	0.198091
AN10628	1.35696	8.52399e-05	upregulated	1.67832	1.4906e-08	upregulated	3.91874	1.07385e-43	upregulated	0.419038	0.234678		0.691482	0.0164748		2.96403	5.91382e-30	upregulated	0.0579067	0.88974
AN10581	1.19385	2.22801e-05	upregulated	1.65663	2.50274e-11	upregulated	3.47713	1.99174e-46	upregulated	0.630526	0.0173336		0.730783	0.00432336		2.41204	5.83651e-23	upregulated	-0.0237415	0.949145
AN0468	1.13361	1.57424e-07	upregulated	1.754	1.99605e-19	upregulated	3.19195	2.83054e-62	upregulated	0.794793	8.70425e-05		0.79703	6.18927e-05		2.21697	1.2543e-30	upregulated	0.290402	0.198495
AN0061	1.23274	0.0027751	upregulated	1.19794	0.000765052	upregulated	2.15483	3.35833e-10	upregulated	-0.403752	0.308335		0.478832	0.20025		1.27155	0.000282514	upregulated	-1.03309	0.00515131	downregulated
AN0045	1.0873	0.000817145	upregulated	3.13762	1.72508e-30	upregulated	4.83917	1.07946e-71	upregulated	0.206262	0.532174		2.21111	8.16519e-16	upregulated	3.92035	2.05026e-47	upregulated	0.115405	0.757838
AN7181	1.02255	0.000767316	upregulated	1.57623	1.07755e-09	upregulated	0.78204	0.00327283		2.65211	4.46862e-25	upregulated	2.11228	5.71759e-17	upregulated	1.33684	1.67895e-07	upregulated	2.97528	1.1155e-31	upregulated
AN6401	3.71723	6.5462e-10	upregulated	1.21944	0.0406894	upregulated	0.17385	0.805659		1.9692	0.000702968	upregulated	1.76272	0.00188915	upregulated	1.14701	0.0487788	upregulated	1.47205	0.0136647	upregulated
AN5437	1.03218	0.000336027	upregulated	1.15185	2.86084e-06	upregulated	0.429447	0.113189		1.46902	2.58258e-09	upregulated	1.76712	4.99836e-15	upregulated	0.544084	0.0270486		2.02167	5.13246e-19	upregulated
AN3551	1.24169	0.000514652	upregulated	1.27197	3.01249e-05	upregulated	-0.292665	0.45457		1.5835	2.27652e-07	upregulated	0.794332	0.00523278		-0.909539	0.00530422		0.917376	0.00137795
AN1088	1.18854	0.00835148	upregulated	2.37322	4.5375e-11	upregulated	0.828152	0.0344517		2.3847	6.82499e-11	upregulated	0.661632	0.0761465		-0.650865	0.10199		1.17995	0.00123927	upregulated
AN0664	1.34413	4.06839e-09	upregulated	1.92508	1.35888e-20	upregulated	0.868075	4.61296e-05		1.89767	1.15851e-19	upregulated	1.06466	2.39742e-07	upregulated	0.178306	0.451819		1.20482	7.95232e-09	upregulated
AN6664	1.3958	0.0117781	upregulated	1.08971	0.020996	upregulated	-0.406757	0.496171		-0.355309	0.558248		-0.515012	0.282405		-1.4179	0.00509617	downregulated	-0.949146	0.0532525
AN12170	1.00854	0.000308759	upregulated	1.05317	1.10564e-05	upregulated	0.99179	4.4508e-05		0.423538	0.117701		0.467336	0.0515606		0.205397	0.436585		0.315006	0.230162
AN8981	3.22133	1.42808e-07	upregulated	-2.31543	0.000180335	downregulated	-1.84468	0.0029739	downregulated	-1.45549	0.0211408	downregulated	-1.21822	0.0338427	downregulated	-1.06089	0.0664268		-0.923989	0.134239
AN8980	2.23847	2.64975e-06	upregulated	-3.20255	8.78883e-07	downregulated	-1.78909	0.00201115	downregulated	-2.28689	0.000231735	downregulated	-2.24892	6.30396e-07	downregulated	-1.13062	0.0080735	downregulated	-1.29409	0.00294133	downregulated
AN8979	2.72626	1.73383e-06	upregulated	-3.37053	7.07256e-11	downregulated	-3.18816	6.16274e-10	downregulated	-3.14284	2.05642e-09	downregulated	-2.45802	1.81294e-06	downregulated	-2.37166	3.95326e-06	downregulated	-1.93784	0.0002944	downregulated
AN8093	1.44041	0.00100871	upregulated	-2.47057	1.51582e-09	downregulated	-4.02641	4.20317e-15	downregulated	-1.04224	0.011469	downregulated	-1.84663	1.66028e-06	downregulated	-3.30105	1.44557e-15	downregulated	-0.804431	0.0490687
AN5421	1.15648	0.00549346	upregulated	-3.5395	4.12628e-19	downregulated	-4.74515	1.05952e-20	downregulated	-2.25225	3.11843e-09	downregulated	-3.18129	4.29141e-17	downregulated	-4.74031	1.32317e-25	downregulated	-1.73795	1.6515e-06	downregulated
AN2350	1.17403	0.0484334	upregulated	-1.43676	0.00558628	downregulated	-2.90896	2.45724e-06	downregulated	-2.02457	0.00028255	downregulated	-3.09908	3.55906e-08	downregulated	-5.2122	1.51656e-09	downregulated	-2.29495	1.01615e-05	downregulated
AN8653	1.10501	0.00398629	upregulated	-2.16614	1.8479e-08	downregulated	-2.47166	2.1389e-08	downregulated	-0.750916	0.0460658		-6.02937	3.53808e-11	downregulated	-5.17619	9.84146e-13	downregulated	-1.90852	1.01485e-07	downregulated
AN8327	1.67762	5.68222e-05	upregulated	-1.38927	0.00160183	downregulated	-2.1888	4.38037e-05	downregulated	-0.24437	0.614457		-0.771758	0.0388772		-1.76469	8.47552e-06	downregulated	0.134524	0.76706
AN8084	1.03955	0.00609454	upregulated	-1.32009	0.000270517	downregulated	-1.34653	0.00054363	downregulated	-0.999844	0.00852159		-1.71603	1.90624e-06	downregulated	-1.70285	2.82865e-06	downregulated	-0.764309	0.0255856
AN7058	1.436	1.92581e-06	upregulated	-1.0822	0.000188896	downregulated	-2.55141	7.10048e-15	downregulated	-0.312957	0.328538		-0.805714	0.00375026		-2.44051	4.44627e-17	downregulated	-0.179173	0.596159
AN6421	1.04509	0.0465919	upregulated	-1.68316	0.000271157	downregulated	-1.03497	0.026781	downregulated	-0.958707	0.0441851		-0.8119	0.0658106		-0.744142	0.0936323		-0.742164	0.107996
AN5665	1.01024	9.26304e-05	upregulated	-1.10562	2.30709e-06	downregulated	-1.70948	7.85263e-13	downregulated	-0.592346	0.0157624		-1.22507	1.04949e-07	downregulated	-1.42986	5.37637e-10	downregulated	-0.667024	0.00566896
AN4119	2.21069	4.70617e-11	upregulated	-1.06953	0.00101003	downregulated	-1.69531	9.29322e-08	downregulated	-0.366952	0.308236		-1.31078	3.57642e-05	downregulated	-2.40362	1.17751e-14	downregulated	-1.52198	2.41019e-06	downregulated
AN12156	1.03019	0.00211156	upregulated	-1.02403	0.000495934	downregulated	-1.19502	4.15293e-05	downregulated	0.164446	0.634159		-1.40702	1.0014e-06	downregulated	-2.02763	1.88179e-12	downregulated	-0.762465	0.0123153
AN9171	3.53102	0.0457281	upregulated	2.61788	0.0834891		5.35687	6.75977e-05	upregulated	3.21234	0.0315167	upregulated	-1.11325	0.306567		2.32593	0.000941831	upregulated	0.857106	0.325851
AN8329	1.30926	0.0184899	upregulated	0.684677	0.17009		1.34979	0.00322834	upregulated	1.77426	7.14208e-05	upregulated	-0.491003	0.298505		0.524936	0.21121		1.0898	0.00450766	upregulated
AN5035	1.16146	8.43272e-08	upregulated	0.861457	1.67617e-05		1.06266	6.71121e-08	upregulated	1.81758	2.06041e-20	upregulated	0.377069	0.0680848		0.458399	0.0243876		0.813236	5.85766e-05
AN2384	1.14544	0.00166587	upregulated	0.817137	0.0101418		1.13073	0.000296408	upregulated	1.00574	0.00179416	upregulated	0.796255	0.00399249		0.409553	0.173962		0.905554	0.00107858
AN0362	1.48534	1.66329e-14	upregulated	0.506889	0.00816212		1.62087	2.40013e-19	upregulated	1.0651	9.90473e-09	upregulated	-0.0778583	0.717983		0.764219	3.12439e-05		0.24175	0.254364
AN6455	1.98717	0.0113213	upregulated	0.172288	0.854866		1.73339	0.00886893	upregulated	-1.9476	0.0263141	downregulated	-1.68326	0.0129178	downregulated	-0.290697	0.690572		-2.99131	7.18449e-05	downregulated
AN8483	1.13327	2.53293e-06	upregulated	-0.207682	0.424101		2.12755	3.02115e-24	upregulated	0.00367919	0.99036		-0.569807	0.0109504		1.26818	8.69572e-10	upregulated	-0.399535	0.0934834
AN7558	1.27018	1.70068e-16	upregulated	0.170216	0.312618		1.26422	2.11848e-18	upregulated	0.480708	0.00175924		-0.900696	7.99883e-10		-0.0227775	0.9067		-0.404885	0.00999747
AN6862	1.28054	2.81905e-14	upregulated	0.554666	0.000744346		1.92076	2.09381e-35	upregulated	0.0513048	0.80281		-0.234484	0.165027		1.02305	1.71949e-11	upregulated	-0.140916	0.458656
AN6410	1.71422	0.0104917	upregulated	1.0858	0.0667185		1.44097	0.0117697	upregulated	0.761351	0.235424		-0.960511	0.0926231		-1.9111	0.00235523	downregulated	-1.51321	0.0112472	downregulated
AN5090	1.66951	2.79331e-07	upregulated	0.695431	0.0258237		2.35316	4.9158e-16	upregulated	0.533585	0.0994566		-0.472853	0.132561		1.06678	0.00031477	upregulated	-0.274998	0.440758
AN5086	1.01485	0.000821264	upregulated	0.60711	0.0250885		2.65643	5.27071e-29	upregulated	0.827619	0.00232972		-0.0156687	0.960228		2.4188	3.42849e-30	upregulated	-0.0829974	0.804107
AN4914	1.04046	0.00376974	upregulated	0.94657	0.00225843		2.43197	1.38321e-16	upregulated	0.158497	0.667884		0.377766	0.244289		1.93454	4.22498e-11	upregulated	-0.118643	0.769219
AN4913	1.12903	3.17788e-07	upregulated	0.528268	0.0118313		1.98317	3.85428e-24	upregulated	0.613358	0.00359615		-0.124446	0.586491		1.54115	2.56232e-15	upregulated	-0.219856	0.353374
AN2571	1.39263	0.0193108	upregulated	0.245747	0.693994		1.86522	0.000117833	upregulated	-0.806298	0.129705		0.160235	0.781735		0.673617	0.195961		-1.33575	0.00970726	downregulated
AN1651	1.22013	9.02689e-07	upregulated	0.0979712	0.747959		1.4312	8.38053e-11	upregulated	0.289512	0.273109		-0.410005	0.0778004		0.898615	1.34962e-05		-0.164152	0.536496
AN12102	1.04337	0.0183502	upregulated	0.705029	0.0665689		2.32701	3.52243e-11	upregulated	0.341748	0.413188		-0.220535	0.589984		1.50902	1.9043e-05	upregulated	-0.298306	0.495655
AN11095	1.25462	0.000555075	upregulated	0.526871	0.123187		2.49365	3.10048e-16	upregulated	0.896331	0.00642333		-0.290502	0.399856		1.88114	5.65601e-10	upregulated	-0.124516	0.765275
AN10977	1.31104	5.66758e-13	upregulated	0.744195	1.92869e-05		2.69664	1.47614e-58	upregulated	0.326091	0.0817747		0.0597921	0.770934		1.50233	4.28032e-19	upregulated	-0.111581	0.610857
AN10631	1.11605	0.0027228	upregulated	0.886539	0.00641874		3.55393	1.14207e-31	upregulated	0.19043	0.618365		-0.024573	0.950221		2.53528	4.79743e-17	upregulated	-0.152156	0.710033
AN10626	1.15792	0.0207156	upregulated	0.901589	0.0350981		3.49924	5.9039e-19	upregulated	0.771238	0.0796278		0.0237773	0.963045		2.8762	1.88831e-13	upregulated	-0.257749	0.615952
AN0366	1.86737	1.1704e-20	upregulated	0.915097	4.01405e-06		1.16325	5.08694e-09	upregulated	0.197361	0.426915		-1.20967	1.50471e-10	downregulated	-0.741593	4.77023e-05		-1.39929	1.80191e-13	downregulated
AN5709	1.26289	0.00221983	upregulated	-0.889975	0.0209085		-1.5853	7.92246e-05	downregulated	-1.1161	0.00508873	downregulated	-1.49235	4.72315e-05	downregulated	-2.29498	3.02266e-09	downregulated	-1.66894	7.3714e-06	downregulated
AN9302	1.28167	0.00164682	upregulated	-0.873377	0.0345603		-1.5363	0.00150325	downregulated	0.266603	0.539126		-0.756981	0.0366651		-1.49027	0.000151162	downregulated	0.0439965	0.925506
AN8983	1.20877	0.0121509	upregulated	-0.948159	0.0375541		-2.41871	2.52255e-05	downregulated	-0.0602158	0.913111		-1.29776	0.00234666	downregulated	-2.42039	7.98773e-07	downregulated	-0.829893	0.0544501
AN8611	1.55571	1.49775e-13	upregulated	-0.678356	0.00125472		-1.4077	2.89828e-11	downregulated	0.132568	0.586413		-0.80262	6.4593e-05		-1.20667	1.40809e-09	downregulated	-0.0128241	0.964787
AN7539	1.44722	0.000255483	upregulated	0.45735	0.236231		-1.39854	5.09872e-05	downregulated	0.769782	0.0362994		0.273585	0.477988		-1.3871	5.99873e-05	downregulated	0.535036	0.170241
AN5885	1.06881	0.0128853	upregulated	-0.302148	0.47535		-1.65907	8.00572e-06	downregulated	0.596044	0.123221		1.49989	1.64047e-05	upregulated	-0.644973	0.0835897		1.27665	0.000408915	upregulated
AN5664	1.40277	1.97961e-05	upregulated	-0.294047	0.401496		-1.70636	3.38351e-07	downregulated	0.127432	0.728264		0.698778	0.016573		-0.419431	0.177293		0.656446	0.0315136
AN4338	1.14677	7.57844e-05	upregulated	-0.576448	0.0385267		-1.287	4.71129e-06	downregulated	-0.742854	0.00876189		-0.520078	0.0511653		-2.19199	3.63417e-15	downregulated	-0.351924	0.223197
AN4131	1.64075	1.1013e-14	upregulated	-0.440401	0.0399919		-1.14741	1.10572e-08	downregulated	0.694831	0.000906874		-0.785525	0.000116594		-1.23946	5.56756e-10	downregulated	-0.128309	0.618987
AN4120	1.33187	8.77632e-09	upregulated	-0.747768	0.000818192		-1.14802	2.41587e-07	downregulated	0.299636	0.213956		-0.756426	0.000489631		-1.35467	2.73114e-10	downregulated	-0.371561	0.117694
AN3557	1.02223	0.00010052	upregulated	-0.888339	0.000303183		-1.22874	1.33271e-06	downregulated	0.197387	0.471456		-0.528137	0.0284393		-1.25368	1.80012e-07	downregulated	0.479576	0.0500487
AN1315	1.0395	0.00886151	upregulated	-0.357188	0.360355		-1.93901	1.54205e-06	downregulated	0.671093	0.0594163		-1.33422	0.000143806	downregulated	-2.92706	4.08354e-12	downregulated	-0.35081	0.360084
AN10402	1.20187	0.00376974	upregulated	-0.619973	0.125234		-1.15736	0.00603093	downregulated	0.466584	0.24455		-1.29827	0.000518857	downregulated	-1.75649	7.86585e-06	downregulated	-0.505599	0.192605
AN0338	1.31621	9.69611e-07	upregulated	-0.655643	0.0133331		-1.24481	4.78019e-06	downregulated	0.600602	0.0217097		-0.12597	0.647677		-1.10546	8.79181e-06	downregulated	0.637215	0.0105592
AN8627	1.61521	5.63587e-20	upregulated	0.724336	2.97722e-05		0.575167	0.00111359		1.39342	2.47892e-16	upregulated	-0.250258	0.158182		-0.386999	0.0252001		0.376213	0.0334659
AN8333	1.42436	2.38939e-05	upregulated	-0.0284635	0.954877		-0.322283	0.338404		1.12289	0.000276782	upregulated	-0.249722	0.452499		-0.94836	0.00189532		0.309671	0.380356
AN5037	2.18214	7.66555e-07	upregulated	0.397945	0.397245		-0.0678184	0.896574		1.7587	1.70645e-05	upregulated	0.352042	0.422582		-0.431253	0.324348		1.35391	0.00102343	upregulated
AN1941	2.78971	2.96919e-07	upregulated	0.887949	0.0993416		0.688039	0.201047		1.88978	0.000216631	upregulated	1.77796	0.000307779	upregulated	0.856913	0.096632		1.68707	0.000944134	upregulated
AN1604	2.30476	1.29551e-09	upregulated	0.305346	0.485412		-0.194249	0.673298		1.64477	5.75833e-06	upregulated	0.575958	0.09438		-0.104567	0.798314		1.25469	0.000171833	upregulated
AN10506	1.23521	1.22241e-07	upregulated	0.266928	0.270532		0.251713	0.2849		1.361	2.03703e-10	upregulated	0.205743	0.379072		0.58151	0.00709744		0.786567	0.000324768
AN10325	1.88762	0.0415306	upregulated	1.3676	0.0819455		0.227098	0.825468		2.44029	0.000984847	upregulated	2.50991	1.09923e-05	upregulated	1.5664	0.00882405	upregulated	2.76654	1.64848e-06	upregulated
AN0759	1.35775	0.0108807	upregulated	0.771557	0.10468		-0.210459	0.701444		1.1131	0.0165232	upregulated	-0.267238	0.58781		-0.60437	0.200468		0.510073	0.30307
AN0517	1.18017	0.0167644	upregulated	0.218939	0.677094		-0.00667709	0.994966		1.24267	0.00273924	upregulated	-0.398057	0.358081		-0.230694	0.614005		-0.142567	0.779859
AN0402	1.05538	0.0445218	upregulated	0.859668	0.0505907		0.165828	0.744117		1.84498	1.15009e-05	upregulated	-0.48113	0.286635		-0.894583	0.0390355		0.254142	0.630653
AN4795	1.04495	0.000655621	upregulated	0.586244	0.0355086		0.337074	0.240072		-1.26308	4.88306e-06	downregulated	-0.499299	0.0723433		-0.00379738	0.996762		-1.21392	8.6577e-06	downregulated
AN4608	1.00156	5.77671e-05	upregulated	-0.675589	0.00297189		-0.274356	0.251581		-1.00817	7.82965e-06	downregulated	-0.421485	0.0682842		-0.428107	0.0635526		-1.03015	5.09526e-06	downregulated
AN9345	1.65888	0.0296356	upregulated	0.252802	0.764808		-0.537403	0.510199		0.05842	0.947713		0.00600485	0.99369		-0.502862	0.447324		-0.320592	0.661445
AN9315	1.02835	0.0120641	upregulated	-0.823933	0.0221762		-0.904237	0.011598		0.5013	0.180672		0.361156	0.321294		-0.947716	0.00654071		0.205328	0.629543
AN9300	1.1858	8.34397e-05	upregulated	-0.014664	0.975543		-0.589601	0.05546		0.654316	0.021904		-0.413557	0.13828		-0.647538	0.0189756		-0.163518	0.613951
AN9021	1.0088	1.43195e-09	upregulated	-0.878634	3.01831e-08		-0.974328	1.13657e-09		-0.0930876	0.623915		-1.09156	2.55019e-12	downregulated	-0.929126	2.35089e-09		-0.361634	0.0305818
AN8803	2.31078	0.0141383	upregulated	0.515173	0.59188		-0.323573	0.737145		1.32401	0.117545		2.21499	0.00411336	upregulated	-0.241193	0.797609		1.22277	0.15158
AN8754	1.08283	6.6871e-08	upregulated	-0.268046	0.190326		-0.302996	0.122303		0.559556	0.00360026		-0.165666	0.416802		-0.108077	0.616178		0.259081	0.218227
AN8422	1.27944	0.000267443	upregulated	-0.0660038	0.88475		-0.604462	0.0810273		0.77324	0.0176026		-0.416303	0.198654		-0.999113	0.00157385		0.553313	0.0859907
AN8303	1.51314	0.00466286	upregulated	-0.197249	0.752242		-0.867907	0.122315		0.593727	0.25373		-0.10489	0.839884		-1.74244	0.000462315	downregulated	0.450712	0.350111
AN8222	2.3464	2.63198e-12	upregulated	0.539983	0.136942		0.30926	0.434545		0.758007	0.0345661		-0.801808	0.00669994		-1.4586	2.02183e-06	downregulated	-0.309637	0.340385
AN8174	1.19008	5.65221e-09	upregulated	-0.524394	0.0102852		0.273666	0.189621		0.0311913	0.903058		-1.07183	2.67671e-08	downregulated	-0.716533	0.00018954		-0.362891	0.0761926
AN8158	1.02484	0.0418041	upregulated	0.256056	0.610644		0.455031	0.320549		0.761417	0.079696		-0.316497	0.468293		-0.0394056	0.939153		-0.0305842	0.955723
AN8154	1.17492	2.002e-06	upregulated	-0.168592	0.555054		0.557764	0.0194454		-0.0388305	0.902283		-0.422567	0.0658166		0.45894	0.0313726		-0.27437	0.26255
AN8132	1.40949	0.000703278	upregulated	-0.408626	0.357238		0.107417	0.824954		0.060067	0.905371		-2.22332	2.71003e-07	downregulated	-1.73944	1.89896e-05	downregulated	-1.68405	1.98623e-05	downregulated
AN7820	1.64505	0.0197976	upregulated	0.230366	0.774062		0.309379	0.681779		0.983425	0.1278		-0.0713299	0.909706		-0.966349	0.109596		0.180708	0.787236
AN7397	1.18244	0.00946392	upregulated	0.515865	0.222501		0.216998	0.649764		0.874023	0.030857		-0.868337	0.0311344		-0.969876	0.0179415		-0.537493	0.194952
AN7378	1.11789	1.70776e-06	upregulated	-0.0472435	0.878613		0.658896	0.00230991		-0.212434	0.400217		-0.444174	0.0429193		0.291076	0.188813		-0.0275522	0.928355
AN7278	1.10468	7.01513e-15	upregulated	-0.364932	0.00977542		-0.428382	0.00192645		0.633913	4.06597e-06		-0.815948	1.26697e-09		-0.625329	3.67234e-06		-0.138135	0.390482
AN7026	1.27934	1.94656e-11	upregulated	-0.0547698	0.825376		-0.022544	0.925629		0.653685	0.000414457		-0.00558212	0.980957		-0.0682023	0.75362		0.502022	0.00813636
AN6791	1.19762	5.88058e-06	upregulated	-0.55592	0.0299597		-0.330873	0.210438		-0.678519	0.00890776		-0.911135	0.000163964		-1.2601	1.82886e-07	downregulated	-1.33361	4.92061e-08	downregulated
AN6319	1.09228	1.03707e-09	upregulated	-0.0655818	0.773807		-0.366838	0.052051		0.865594	3.05555e-07		-0.359705	0.0362269		-0.795997	3.18339e-06		0.203547	0.266678
AN5944	1.1298	0.0353202	upregulated	0.429325	0.390494		-0.158689	0.779461		0.106432	0.850989		-0.467552	0.314171		-1.86257	0.000161249	downregulated	-1.26419	0.00714883	downregulated
AN5942	1.75984	8.65021e-05	upregulated	-0.645185	0.136368		-0.579182	0.172478		-0.39564	0.386189		-1.08119	0.00766981	downregulated	-0.981023	0.0157792		-0.944885	0.0265678
AN5844	1.23446	4.12508e-06	upregulated	-0.275506	0.33026		-0.209844	0.462063		0.954584	0.000120172		-0.808822	0.00104845		-0.972625	7.99695e-05		-0.196399	0.497252
AN5584	1.15867	2.29222e-05	upregulated	-0.312844	0.257915		-0.0228874	0.947334		0.73082	0.00411135		0.119094	0.671611		0.0207405	0.949444		0.578774	0.0257593
AN5568	1.12518	5.0104e-14	upregulated	0.0973661	0.577979		0.220104	0.146067		0.699169	1.21768e-06		0.191238	0.211326		-0.0937656	0.56994		0.297141	0.056639
AN5353	1.12102	1.11038e-12	upregulated	-0.0621585	0.75564		-0.455159	0.0036687		0.466372	0.00288757		-0.66372	9.78945e-06		-0.983886	4.42107e-11		0.120083	0.505802
AN5046	1.96895	0.0184742	upregulated	1.37679	0.0576219		0.585359	0.468415		1.07104	0.161447		1.6193	0.00981296	upregulated	-0.0640699	0.940664		0.781905	0.273125
AN3858	2.60675	5.25913e-06	upregulated	-0.13347	0.867715		-0.654975	0.349154		-1.27998	0.0800657		-1.81801	0.000332811	downregulated	-2.14049	4.88723e-05	downregulated	-2.30893	1.26863e-05	downregulated
AN3818	1.26015	5.9171e-09	upregulated	-0.219426	0.365683		-0.527964	0.0243114		-0.307098	0.207526		-0.889726	1.37375e-05		-1.29283	1.24486e-09	downregulated	-0.493248	0.0175632
AN3574	1.25754	0.000975609	upregulated	0.282335	0.474453		0.703217	0.0419272		0.0984987	0.817062		0.0550027	0.887922		0.652622	0.043831		0.149455	0.715191
AN3474	1.31843	1.58255e-13	upregulated	-0.0921547	0.678993		0.168807	0.389377		0.641931	0.000287964		-0.544813	0.00148582		-0.33152	0.0588897		0.0719005	0.741763
AN3379	1.09223	0.000990401	upregulated	0.51886	0.0910028		-0.669428	0.0437956		0.898448	0.00243491		0.340828	0.243791		-1.00816	0.000853002	downregulated	0.801922	0.00390755
AN2942	1.09991	7.02858e-12	upregulated	-0.208685	0.216638		0.412324	0.00762934		0.396984	0.012811		-0.294651	0.0634083		0.314385	0.046154		0.00156442	0.9969
AN2352	1.47032	3.21729e-06	upregulated	-0.271664	0.454526		-0.708048	0.0503224		0.170314	0.648463		-0.437203	0.127801		-1.3809	6.85682e-06	downregulated	-0.10532	0.759665
AN2351	1.8108	0.0425881	upregulated	0.354613	0.710913		-1.02435	0.302763		-1.22073	0.231417		-0.16315	0.834458		-0.344445	0.65488		0.581711	0.42333
AN2156	1.01627	0.0322144	upregulated	0.21803	0.654848		0.528829	0.21295		0.11009	0.828436		-0.880996	0.034908		-0.709354	0.0903087		-0.257384	0.569174
AN1815	1.40398	0.0273246	upregulated	0.831888	0.136185		-0.852607	0.225548		0.154218	0.826136		1.18437	0.0065586	upregulated	-0.404554	0.466447		-0.0771141	0.90937
AN1808	1.54238	0.0198585	upregulated	0.660615	0.285686		0.727066	0.234031		0.800852	0.195151		-0.626093	0.262238		-1.29251	0.0282601	downregulated	-0.414625	0.490444
AN1756	1.77186	2.26537e-14	upregulated	-0.327294	0.184623		-0.451637	0.0532172		-0.0307447	0.916411		-0.308553	0.190891		-0.608707	0.00691237		-0.275016	0.281723
AN1615	1.54515	0.027159	upregulated	0.320712	0.660385		0.657732	0.298671		1.09992	0.0724116		-0.152703	0.816229		0.963496	0.0788205		-0.00585993	0.996502
AN1612	1.14241	2.64901e-06	upregulated	-0.167337	0.543137		-0.246791	0.342103		0.395187	0.106453		0.0903077	0.716289		-0.571733	0.011608		-0.597951	0.00954906
AN1573	1.01286	3.5338e-05	upregulated	-0.488165	0.0341388		-0.814855	0.000222951		-0.123467	0.64056		-0.884722	5.49195e-05		-0.990291	5.52305e-06		-0.708845	0.00191172
AN12371	1.98791	0.000865387	upregulated	-0.0839424	0.921175		-0.343293	0.625412		-0.336312	0.635779		-1.37089	0.00874567	downregulated	-1.30868	0.0125362	downregulated	-0.717125	0.177818
AN1220	1.00955	6.25832e-08	upregulated	-0.887994	2.79873e-07		-0.639104	0.000237458		0.803012	3.86691e-06		-0.762344	9.41526e-06		-1.43074	3.57473e-17	downregulated	0.00193575	0.996351
AN12067	1.05109	0.00119374	upregulated	-0.0894501	0.819058		-0.402209	0.212089		0.476944	0.121968		0.115281	0.715016		-0.212083	0.500645		0.423104	0.155092
AN12003	1.80983	0.00295006	upregulated	0.232815	0.746845		0.00615898	0.998473		0.763223	0.208581		-0.595195	0.238155		-1.45624	0.00846198	downregulated	-0.767062	0.140236
AN11907	1.25258	0.0249364	upregulated	0.414471	0.442396		-0.0210267	0.981052		0.923552	0.0594163		-0.96772	0.047535		-1.12762	0.0256652	downregulated	-0.16232	0.767762
AN11754	1.15387	1.94656e-11	upregulated	0.897813	1.58027e-08		0.881778	6.25369e-08		0.933855	1.1208e-08		0.090975	0.597956		-0.039574	0.83913		0.0680015	0.728514
AN11541	1.14617	4.834e-08	upregulated	-0.378091	0.0788708		-0.474371	0.0280164		0.392337	0.0646335		-0.367497	0.066382		-0.249545	0.226324		0.0266977	0.922622
AN11511	1.74994	0.00706736	upregulated	0.471579	0.479016		0.285299	0.687048		-0.56314	0.444984		-1.1484	0.0402858	downregulated	-1.67298	0.00502917	downregulated	-0.972119	0.0871609
AN11292	1.18607	0.000447113	upregulated	-0.377044	0.273754		-0.871794	0.0101074		0.508297	0.118564		-0.29631	0.347329		-1.05413	0.000595725	downregulated	0.285766	0.385748
AN11281	1.72681	0.0227743	upregulated	0.0642445	0.950429		0.749712	0.259835		-1.13487	0.0882536		-1.01993	0.116994		-1.15513	0.0730041		-1.93136	0.00281081	downregulated
AN11215	1.50272	7.36938e-05	upregulated	0.636132	0.0801264		-0.0725205	0.876451		0.1601	0.712734		0.00569182	0.988719		-0.426182	0.220087		0.147264	0.710292
AN11210	1.619	3.54435e-06	upregulated	0.378235	0.30053		-0.590928	0.113276		-0.190772	0.640757		0.0194289	0.959183		-0.601549	0.0618836		-0.0180841	0.967144
AN10588	1.53807	8.89804e-16	upregulated	0.201477	0.338959		-0.648829	0.000597482		0.386482	0.0503594		-0.0500829	0.820549		-1.48451	2.52676e-16	downregulated	-0.00462678	0.988472
AN10242	1.16277	9.59063e-27	upregulated	-0.341639	0.00224526		-0.638873	8.2646e-09		0.0513809	0.698518		0.0124776	0.923171		-0.658729	4.60075e-10		0.0249535	0.867723
AN0627	1.02435	2.88535e-09	upregulated	0.429614	0.00992317		0.744716	2.96228e-06		0.207725	0.249043		0.0535594	0.779546		0.157575	0.377301		-0.226503	0.217323
AN5461	-1.33038	9.72995e-08	downregulated	-1.95695	4.75869e-18	downregulated	-2.53946	1.98928e-25	downregulated	-2.08302	8.59719e-19	downregulated	-1.88036	1.52437e-10	downregulated	-2.18186	2.55824e-12	downregulated	-1.38432	4.63053e-07	downregulated
AN3970	-1.07897	2.23586e-06	downregulated	-2.10259	7.43404e-24	downregulated	-1.80111	3.80405e-17	downregulated	-1.7669	1.16459e-16	downregulated	-1.15435	4.50499e-06	downregulated	-0.882702	0.000370259		-0.740007	0.0025805
AN5410	-1.18259	2.61041e-10	downregulated	-1.11271	1.08323e-10	downregulated	-1.11194	1.14154e-10	downregulated	-0.51602	0.0043269		-1.1534	5.81767e-10	downregulated	-1.20777	9.68475e-11	downregulated	-0.297504	0.14256
AN12487	-1.10873	3.87115e-11	downregulated	-1.2089	6.78089e-15	downregulated	-1.72633	7.60852e-29	downregulated	-0.594961	0.000225366		-0.836378	2.38813e-07		-1.13367	2.18625e-12	downregulated	-0.0847845	0.684522
AN1242	-1.19034	1.6849e-09	downregulated	-1.38305	2.23139e-14	downregulated	-1.58998	1.31227e-18	downregulated	-0.75394	5.60929e-05		-0.355988	0.0704651		-0.798479	2.43735e-05		0.053865	0.835942
AN8809	-3.33553	6.91065e-153	downregulated	-1.44879	2.68578e-41	downregulated	-0.665918	6.68241e-10		-0.893104	2.56631e-16		0.343788	0.0298977		-0.425234	0.0145875		0.362225	0.0238819
AN9005	-1.65147	3.47346e-21	downregulated	2.38343	1.4382e-69	upregulated	3.9288	7.25276e-191	upregulated	1.17404	8.71849e-17	upregulated	1.30477	7.42336e-14	upregulated	1.29345	1.44191e-13	upregulated	2.14606	5.01168e-38	upregulated
AN2564	-3.53676	0.0331923	downregulated	3.35131	2.01022e-11	upregulated	2.63439	3.44027e-07	upregulated	2.45283	3.6457e-06	upregulated	4.14341	0.0020951	upregulated	2.45785	0.114196		3.28368	0.0248804	upregulated
AN9168	-1.00455	0.00215742	downregulated	3.85092	4.61613e-46	upregulated	5.32286	7.52144e-88	upregulated	0.78368	0.0069864		5.08977	1.7631e-79	upregulated	6.09692	2.96509e-114	upregulated	1.753	4.10847e-10	upregulated
AN8899	-1.0157	2.98855e-05	downregulated	3.29852	1.37407e-57	upregulated	3.20584	6.90577e-55	upregulated	-0.986313	6.88527e-06		4.19718	1.98213e-90	upregulated	4.11648	1.73106e-87	upregulated	-0.788041	0.000730571
AN6792	-8.87263	3.36454e-11	downregulated	4.02274	2.13213e-54	upregulated	5.84039	9.2868e-115	upregulated	0.18635	0.574024		1.45068	0.460001		2.42311	0.170791		1.20024	0.589747
AN2565	-2.75189	1.67742e-61	downregulated	1.36709	4.17429e-23	upregulated	1.00039	6.8014e-13	upregulated	0.753898	1.43622e-07		1.00407	3.6985e-08	upregulated	0.647486	0.000727474		1.11996	6.28958e-10	upregulated
AN10333	-1.59454	2.03393e-05	downregulated	1.0375	1.82377e-05	upregulated	1.20787	6.37804e-07	upregulated	-0.283755	0.35983		2.61297	3.14562e-16	upregulated	2.05271	6.88273e-10	upregulated	0.483336	0.270244
AN2653	-1.19528	0.0159297	downregulated	1.09355	0.00159351	upregulated	0.303735	0.450193		1.47093	1.93645e-05	upregulated	1.57229	0.000138684	upregulated	1.41073	0.000783302	upregulated	2.32451	4.4391e-09	upregulated
AN1567	-2.07311	0.000555075	downregulated	1.10559	0.00170405	upregulated	0.675334	0.074349		0.428371	0.297194		1.03455	0.09438		-0.0547321	0.954429		1.52186	0.0089407	upregulated
AN1323	-1.22485	0.00253298	downregulated	-0.840989	0.00868688		-1.08177	0.00157431	downregulated	-1.82338	9.77582e-07	downregulated	-0.592457	0.214068		0.384493	0.37656		-0.20453	0.698527
AN6236	-1.08218	4.834e-08	downregulated	-0.492492	0.00819066		-1.88045	2.87755e-25	downregulated	0.522663	0.00515467		-0.120269	0.573156		-0.890657	3.64446e-06		0.616159	0.00138327
AN7899	-1.57002	0.000425383	downregulated	0.381291	0.341224		1.02703	0.00370779	upregulated	-0.174739	0.687632		-0.935422	0.0595207		-1.11089	0.0294373	downregulated	-0.119189	0.84172
AN7898	-1.67292	0.00754594	downregulated	0.992704	0.0703153		1.87263	0.000267981	upregulated	-0.200678	0.750745		-0.516709	0.383156		-1.14919	0.0440296	downregulated	-1.04834	0.0789353
AN2683	-1.42862	6.50338e-17	downregulated	0.578304	0.000245731		1.42513	4.04355e-21	upregulated	0.0847248	0.656308		0.636594	0.000199521		1.90883	9.11152e-33	upregulated	0.510018	0.0042679
AN2393	-1.02569	0.00640065	downregulated	0.171726	0.599376		1.0243	7.93892e-05	upregulated	-0.269652	0.406462		0.371707	0.335074		1.81212	3.61838e-09	upregulated	0.489547	0.204091
AN7897	-2.88128	2.73146e-06	downregulated	-0.487406	0.442255		-0.486769	0.420426		-1.13688	0.0496544	downregulated	-1.3547	0.0352395	downregulated	-0.835264	0.197933		-0.784635	0.249874
AN3254	-1.84676	0.00477256	downregulated	0.942678	0.0231946		0.944306	0.0238226		1.37673	0.000748404	upregulated	1.78023	0.0021349	upregulated	1.20719	0.0552409		2.36874	2.26927e-05	upregulated
AN3247	-1.09063	0.012393	downregulated	-0.00165772	upregulated		0.388182	0.265655		1.49982	1.49427e-06	upregulated	0.958681	0.0125822		1.02384	0.00736438	upregulated	1.48154	5.72724e-05	upregulated
AN8808	-2.73418	1.3073e-61	downregulated	-0.665263	1.46079e-07		-0.928339	1.61191e-12		-0.857628	6.97414e-11		0.69605	0.00044588		0.646446	0.00137932		0.854722	9.58276e-06
AN8547	-1.35573	2.17414e-11	downregulated	-0.0909517	0.703674		0.798932	1.29077e-05		0.700989	0.000203073		-0.186268	0.403214		0.71963	0.000252871		0.582818	0.00459439
AN8532	-1.01486	0.00296362	downregulated	-0.405083	0.172498		-0.295617	0.328743		0.0309828	0.931184		-0.837451	0.0210442		-0.707603	0.0525577		0.461574	0.177479
AN7968	-1.14673	0.0313318	downregulated	0.484039	0.192644		-0.171641	0.701721		0.0564703	0.90421		0.705119	0.158406		0.364156	0.524293		1.08499	0.0218247	upregulated
AN7903	-2.06238	0.0126149	downregulated	-0.795181	0.222249		-1.16227	0.0736242		-0.405338	0.558949		-1.71119	0.139474		-1.61385	0.167462		-0.51259	0.634679
AN7902	-2.77869	1.08e-10	downregulated	-0.54233	0.157812		-0.482406	0.203767		-0.82652	0.0287402		-1.48976	0.0141344	downregulated	-1.06953	0.0668568		-0.722686	0.208245
AN7901	-1.16246	0.00570539	downregulated	-0.257733	0.508502		-0.199491	0.605974		-0.110095	0.787353		-0.866654	0.0543419		-1.20693	0.0104748	downregulated	-0.208392	0.681273
AN7900	-1.11489	0.00256432	downregulated	-0.447431	0.178423		-0.499982	0.122505		-0.32981	0.339734		-1.43317	0.000158046	downregulated	-1.87276	3.35566e-06	downregulated	-0.860707	0.0212562
AN7893	-3.65371	1.53845e-13	downregulated	0.341962	0.438884		0.839291	0.0301928		-0.513577	0.228521		0.472727	0.43936		1.53608	0.00303355	upregulated	1.26731	0.0202993	upregulated
AN7798	-1.12321	8.73905e-05	downregulated	0.383221	0.0909802		-0.498461	0.040524		0.746553	0.000601921		0.979663	0.000257945		0.585857	0.0439504		1.88486	2.0447e-14	upregulated
AN7787	-1.72266	0.0489593	downregulated	0.489712	0.403157		0.920132	0.0834773		-0.53235	0.412676		1.65179	0.026439	upregulated	1.91771	0.00814745	upregulated	1.41068	0.0748575
AN7786	-1.21912	9.16708e-08	downregulated	0.0529059	0.823975		-0.317065	0.108481		0.26768	0.166149		0.53651	0.026755		0.115372	0.699045		1.1101	4.20166e-07	upregulated
AN7324	-1.34969	3.36391e-11	downregulated	0.200361	0.293142		0.83367	5.31616e-07		0.556661	0.00141747		0.851357	2.91557e-05		1.87127	2.413e-23	upregulated	0.898774	1.06496e-05
AN6952	-1.13414	0.00166587	downregulated	-0.435173	0.191886		-0.509793	0.111828		0.109917	0.766527		-1.03853	0.00228715	downregulated	-1.22479	0.000353807	downregulated	0.296477	0.433209
AN3877	-1.28567	0.00422994	downregulated	-0.458184	0.247937		-0.137031	0.75365		-0.620214	0.115174		-1.66015	0.00133726	downregulated	-0.749882	0.118028		-0.252107	0.636752
AN3531	-1.50253	0.0234905	downregulated	0.127661	0.833693		-0.994316	0.0580715		-0.287435	0.604995		0.138409	0.857913		0.44808	0.527498		0.664922	0.329471
AN2682	-1.15733	5.58365e-14	downregulated	-0.107817	0.527326		0.297154	0.0427915		0.485235	0.000849645		0.0528851	0.773468		0.344477	0.0294662		0.770375	3.67613e-07
AN2670	-1.08466	0.0389716	downregulated	-0.439201	0.285352		-0.918508	0.0299018		-0.306793	0.482393		0.010136	0.987642		-0.0485709	0.943516		0.972696	0.0376356
AN11584	-2.38139	0.0184899	downregulated	0.940365	0.306616		1.20677	0.162087		-0.301523	0.762749		-1.02298	0.275125		-1.17504	0.210357		-0.683358	0.512962
AN11081	-1.06698	6.43297e-17	downregulated	0.00479839	0.98233		-0.10995	0.397463		0.361706	0.00226651		-0.113041	0.450919		0.376971	0.00459399		0.731953	7.84737e-09
AN10815	-1.02531	9.60535e-09	downregulated	0.0927984	0.610644		-0.191067	0.250661		0.286265	0.0724653		0.602396	0.000793082		0.0395311	0.870536		1.14943	8.00367e-12	upregulated
AN0011	-2.34525	1.04981e-10	downregulated	-0.878907	0.00310054		0.367935	0.225087		-0.874456	0.00445446		-0.804407	0.100994		-0.4677	0.34385		-0.875546	0.0789991
AN0010	-1.34845	0.00107617	downregulated	0.0065207	0.996092		0.630142	0.0375381		-0.155177	0.675144		0.126773	0.801557		-0.184727	0.728853		-0.847735	0.102961
AN0009	-1.45006	3.89006e-06	downregulated	-0.759003	0.00355095		-0.386707	0.157555		-0.106809	0.725329		-0.930146	0.018032		-0.678728	0.0824169		0.121071	0.778245
AN0005	-1.40523	8.2276e-09	downregulated	-0.0353061	0.905947		0.566671	0.00544996		0.476237	0.0248669		-0.0246099	0.938722		0.125913	0.6796		0.266474	0.358461

## Sheet: A. wentii
GENE ID	A. wentii 'c gfdB vs. A. wentii CBS141173 (untreated)			Sorbitol vs. Untreated (A. wentii CBS141173)			NaCl vs. Untreated (A. wentii CBS141173)			NaCl + sorbitol vs. Untreated (A. wentii CBS141173)			Sorbitol vs. Untreated (A. wentii 'c gfdB)			NaCl vs. Untreated (A. wentii 'c gfdB)			NaCl + sorbitol vs. Untreated (A. wentii 'c gfdB)
	log2FoldChange	p-adj.	Regulation	log2FoldChange	p-adj.	Regulation	log2FoldChange	p-adj.	Regulation	log2FoldChange	p-adj.	Regulation	log2FoldChange	p-adj.	Regulation	log2FoldChange	p-adj.	Regulation	log2FoldChange	p-adj.	Regulation
ASPWEDRAFT_102519	1.42344	0.0338638	upregulated	3.58917	2.74254e-10	upregulated	2.38496	3.20581e-05	upregulated	3.01975	3.35263e-07	upregulated	2.08226	0.000534289	upregulated	1.34985	0.0264184	upregulated	1.62649	0.00891202	upregulated
ASPWEDRAFT_112139	2.34216	0.00150504	upregulated	6.95646	7.51733e-27	upregulated	8.68067	3.33977e-42	upregulated	2.96448	2.65902e-05	upregulated	5.0246	3.82473e-14	upregulated	6.40642	1.91766e-23	upregulated	1.50883	0.042267	upregulated
ASPWEDRAFT_114297	1.60103	0.00661344	upregulated	3.94667	5.04772e-16	upregulated	3.47355	8.22429e-13	upregulated	3.34909	3.82741e-11	upregulated	2.68402	1.34044e-08	upregulated	1.97892	2.92401e-05	upregulated	0.125157	0.866599
ASPWEDRAFT_117617	1.17954	0.0247381	upregulated	2.97314	5.55479e-13	upregulated	2.4479	4.15398e-09	upregulated	1.29571	0.00885726	upregulated	2.28809	1.73714e-08	upregulated	2.24955	1.13255e-08	upregulated	0.650881	0.20161
ASPWEDRAFT_119180	2.19236	0.0161109	upregulated	4.05014	3.68088e-08	upregulated	4.07497	1.78004e-08	upregulated	2.09313	0.0186311	upregulated	1.03858	0.123276		2.83006	2.31595e-07	upregulated	-0.396548	0.688331
ASPWEDRAFT_120879	1.46042	2.8511e-05	upregulated	1.17158	0.000560719	upregulated	1.72745	6.69365e-08	upregulated	1.27782	0.000286837	upregulated	0.61375	0.0798272		0.220563	0.565858		0.363222	0.355019
ASPWEDRAFT_121815	3.5337	0.0153291	upregulated	3.15979	0.0214362	upregulated	5.14972	4.03566e-05	upregulated	3.61095	0.0100499	upregulated	2.48833	0.022551	upregulated	3.10673	0.00269899	upregulated	0.077938	0.96261
ASPWEDRAFT_126763	1.81294	0.00676534	upregulated	1.29482	0.0471039	upregulated	1.70551	0.00519938	upregulated	2.7296	9.37323e-06	upregulated	1.19765	0.0580371		0.0460882	0.957448		1.16859	0.0713498
ASPWEDRAFT_127527	1.99943	8.81109e-05	upregulated	1.05517	0.043799	upregulated	1.16815	0.0191644	upregulated	1.9432	0.000121587	upregulated	1.69443	0.00054938	upregulated	0.731002	0.158882		2.20914	4.71147e-06	upregulated
ASPWEDRAFT_134451	2.70624	0.000211418	upregulated	4.22485	1.21423e-10	upregulated	4.88126	2.30834e-14	upregulated	2.84934	6.66893e-05	upregulated	2.68196	6.43842e-06	upregulated	2.70567	2.81385e-06	upregulated	-0.0576451	0.951729
ASPWEDRAFT_147203	2.69325	0.0240499	upregulated	4.94605	7.52236e-07	upregulated	3.3567	0.00106849	upregulated	2.67073	0.0201088	upregulated	-2.35319	0.0603605		1.62907	0.0671114		-1.65152	0.186394
ASPWEDRAFT_156413	2.7985	0.018713	upregulated	5.01192	3.90429e-07	upregulated	5.71138	2.5903e-09	upregulated	3.1866	0.00417696	upregulated	3.05201	2.82805e-05	upregulated	3.32471	2.1077e-06	upregulated	0.182474	0.878859
ASPWEDRAFT_165285	3.17184	0.00310378	upregulated	3.04905	0.00232967	upregulated	3.5228	0.000228345	upregulated	3.43466	0.000828829	upregulated	3.59214	1.24956e-09	upregulated	2.35965	9.3409e-05	upregulated	3.74624	2.49867e-10	upregulated
ASPWEDRAFT_166330	1.36459	0.012151	upregulated	1.68046	0.000660184	upregulated	2.94245	1.98345e-10	upregulated	2.38095	1.30572e-06	upregulated	2.02384	3.1298e-05	upregulated	1.99082	2.63976e-05	upregulated	1.38569	0.00651842	upregulated
ASPWEDRAFT_168292	1.06008	0.0301121	upregulated	5.42553	3.43269e-44	upregulated	7.39533	1.26407e-82	upregulated	1.50172	0.000765314	upregulated	3.76938	3.57825e-21	upregulated	4.82639	9.00022e-36	upregulated	0.730666	0.126778
ASPWEDRAFT_168902	1.96316	0.00117492	upregulated	3.91256	2.88035e-13	upregulated	4.66725	4.72147e-19	upregulated	1.39344	0.0252435	upregulated	1.32288	0.0217723	upregulated	3.12648	1.83394e-09	upregulated	-1.15835	0.0693022
ASPWEDRAFT_171752	2.45985	3.02268e-06	upregulated	3.93176	1.51426e-15	upregulated	3.58985	1.9569e-13	upregulated	2.46174	2.66577e-06	upregulated	-0.56264	0.344531		1.45747	0.0049133	upregulated	-0.986961	0.0843313
ASPWEDRAFT_171952	1.26262	0.00675376	upregulated	1.29678	0.00286551	upregulated	1.84338	7.95709e-06	upregulated	1.10496	0.0164472	upregulated	1.27297	0.00389517	upregulated	1.94832	2.65174e-06	upregulated	0.304465	0.574448
ASPWEDRAFT_172936	1.9227	0.000945775	upregulated	4.73238	3.70829e-22	upregulated	5.19841	3.23698e-27	upregulated	1.44472	0.0168891	upregulated	1.65128	0.000713038	upregulated	3.87044	9.37559e-19	upregulated	-0.492371	0.455735
ASPWEDRAFT_174707	1.47028	2.61002e-05	upregulated	2.06944	9.76539e-11	upregulated	2.5439	2.43433e-16	upregulated	1.25539	0.000401141	upregulated	0.621035	0.0773183		1.36644	1.19147e-05	upregulated	0.515049	0.166437
ASPWEDRAFT_175589	2.51401	0.00013034	upregulated	2.57226	2.91479e-05	upregulated	3.81182	3.38715e-11	upregulated	2.10477	0.00182352	upregulated	0.238231	0.715953		0.898026	0.0917928		-0.835614	0.223072
ASPWEDRAFT_175780	1.53933	1.58922e-08	upregulated	4.50713	2.0047e-73	upregulated	4.2136	8.7405e-65	upregulated	3.1203	2.38682e-34	upregulated	2.07427	1.06249e-15	upregulated	1.94151	2.15872e-14	upregulated	0.752202	0.00835131
ASPWEDRAFT_176189	1.4137	0.00511608	upregulated	2.54664	1.36424e-08	upregulated	1.64606	0.000296112	upregulated	1.44555	0.00320859	upregulated	1.18555	0.0140257	upregulated	1.69159	0.000198638	upregulated	0.288212	0.62913
ASPWEDRAFT_176197	2.83315	3.40869e-06	upregulated	2.29423	0.000133705	upregulated	4.00015	5.53028e-13	upregulated	1.79223	0.00672418	upregulated	1.43653	0.00669258	upregulated	3.93978	6.76265e-17	upregulated	0.60178	0.32876
ASPWEDRAFT_177239	1.69146	0.00279202	upregulated	2.73926	4.96144e-08	upregulated	3.68954	2.23183e-14	upregulated	1.5317	0.0063589	upregulated	1.72271	0.00072415	upregulated	1.79691	0.000274128	upregulated	0.360733	0.57946
ASPWEDRAFT_178497	1.74394	0.0135269	upregulated	3.58937	2.04537e-09	upregulated	4.30824	1.31702e-13	upregulated	2.52926	8.74571e-05	upregulated	1.86167	0.00230315	upregulated	2.87751	4.44093e-07	upregulated	-0.569843	0.469873
ASPWEDRAFT_181100	2.83248	1.99965e-11	upregulated	3.53605	2.27222e-18	upregulated	4.45289	1.23408e-29	upregulated	1.70163	0.00019194	upregulated	0.775775	0.0657338		1.59664	2.82792e-05	upregulated	-1.99358	1.03747e-05	downregulated
ASPWEDRAFT_182542	2.16364	0.000645953	upregulated	3.68403	7.17336e-11	upregulated	4.16835	4.30469e-14	upregulated	2.77537	3.90446e-06	upregulated	1.94703	0.000539192	upregulated	2.50072	2.92487e-06	upregulated	-0.782752	0.257601
ASPWEDRAFT_186664	3.5994	5.4769e-11	upregulated	3.43377	1.71347e-10	upregulated	5.79801	9.88783e-30	upregulated	1.2854	0.0492352	upregulated	0.799345	0.137382		2.19163	3.30286e-06	upregulated	-0.249563	0.708055
ASPWEDRAFT_22499	1.78527	0.00472735	upregulated	2.8557	2.79577e-07	upregulated	3.9425	1.37056e-13	upregulated	2.43168	3.45229e-05	upregulated	2.08956	0.000136714	upregulated	2.45812	2.7872e-06	upregulated	0.459642	0.507928
ASPWEDRAFT_24576	1.36	0.0453824	upregulated	3.60532	2.22597e-11	upregulated	3.07692	1.1189e-08	upregulated	2.66677	3.75331e-06	upregulated	0.388695	0.568688		1.2042	0.0334361	upregulated	0.718573	0.274662
ASPWEDRAFT_26249	1.35946	0.00504628	upregulated	1.93073	1.15218e-05	upregulated	2.05989	1.65367e-06	upregulated	1.13543	0.018543	upregulated	0.426904	0.413243		0.920368	0.0470832		-0.719275	0.156712
ASPWEDRAFT_27045	3.04793	0.000318826	upregulated	3.80425	9.86601e-07	upregulated	4.35259	7.92573e-09	upregulated	4.10309	2.5711e-07	upregulated	1.68242	0.0158919	upregulated	0.813766	0.271204		-0.495939	0.587716
ASPWEDRAFT_27317	1.4938	0.000410812	upregulated	2.11727	3.38886e-08	upregulated	3.2329	8.84068e-19	upregulated	1.73456	2.07014e-05	upregulated	1.50596	9.18912e-05	upregulated	2.06444	1.35215e-08	upregulated	1.29722	0.00107285	upregulated
ASPWEDRAFT_27830	1.07172	0.00504628	upregulated	3.03301	6.21315e-20	upregulated	1.55004	5.10458e-06	upregulated	2.41512	1.85805e-12	upregulated	0.702129	0.0637753		0.361685	0.362943		0.863366	0.0219338
ASPWEDRAFT_28047	1.11529	0.000586783	upregulated	2.75137	1.67181e-22	upregulated	3.62508	1.18942e-39	upregulated	1.26495	5.60734e-05	upregulated	1.69777	6.34709e-09	upregulated	2.3356	4.41673e-17	upregulated	-0.0423134	0.925639
ASPWEDRAFT_284994	1.77146	2.91765e-12	upregulated	1.89097	1.47808e-14	upregulated	2.9794	1.44944e-36	upregulated	1.06173	9.68161e-05	upregulated	0.128428	0.679143		1.59258	1.03042e-11	upregulated	-0.434588	0.135365
ASPWEDRAFT_31226	1.03033	0.0201345	upregulated	2.10143	4.15627e-08	upregulated	3.21702	2.09856e-18	upregulated	1.96259	7.43179e-07	upregulated	2.08954	7.60044e-08	upregulated	3.07018	9.91414e-17	upregulated	1.10971	0.00756162	upregulated
ASPWEDRAFT_317264	4.09045	0.0217317	upregulated	7.35499	2.81457e-07	upregulated	8.79561	2.16701e-10	upregulated	5.34727	0.000676216	upregulated	3.25496	0.000663479	upregulated	4.81758	4.92129e-08	upregulated	0.826174	0.546844
ASPWEDRAFT_32302	2.815	1.59261e-08	upregulated	4.29946	1.63047e-20	upregulated	3.41592	2.30868e-13	upregulated	2.18763	2.42431e-05	upregulated	1.15915	0.0118646	upregulated	2.16275	2.88646e-07	upregulated	-0.896938	0.0882261
ASPWEDRAFT_34601	2.58808	2.54595e-07	upregulated	2.40433	7.55874e-07	upregulated	2.28886	2.09938e-06	upregulated	2.38936	2.62957e-06	upregulated	-0.0628782	0.914505		0.0303398	0.961224		-0.672712	0.20711
ASPWEDRAFT_35935	2.20933	0.00973557	upregulated	2.65055	0.000451116	upregulated	4.56958	3.92485e-11	upregulated	2.73179	0.000540814	upregulated	1.61583	0.0127461	upregulated	1.78907	0.00375668	upregulated	1.25965	0.070728
ASPWEDRAFT_36449	2.95377	0.000244533	upregulated	2.11751	0.00828522	upregulated	3.78768	1.81096e-07	upregulated	2.06234	0.0154723	upregulated	1.28483	0.0628926		1.19035	0.0776654		1.64598	0.0160861	upregulated
ASPWEDRAFT_37912	1.47408	0.0077407	upregulated	2.33605	3.61066e-07	upregulated	1.90568	4.8304e-05	upregulated	2.20067	6.62827e-06	upregulated	0.61551	0.218197		0.0638716	0.917335		0.228391	0.721952
ASPWEDRAFT_38042	1.00995	0.00199329	upregulated	2.04443	2.03521e-13	upregulated	3.082	5.31335e-31	upregulated	1.0499	0.000957487	upregulated	0.439659	0.184532		1.89611	1.80922e-12	upregulated	-0.0480495	0.917053
ASPWEDRAFT_38047	1.15165	0.0349451	upregulated	3.88089	1.99853e-17	upregulated	5.11596	1.96843e-30	upregulated	1.50731	0.0029245	upregulated	1.63464	0.000942036	upregulated	2.90006	3.48053e-10	upregulated	0.531185	0.354113
ASPWEDRAFT_39767	3.8389	0.00990047	upregulated	5.22569	6.61275e-05	upregulated	4.74103	0.000264268	upregulated	6.11506	4.0989e-06	upregulated	0.915732	0.313447		1.22231	0.140571		1.3051	0.140779
ASPWEDRAFT_41153	2.41369	0.00580884	upregulated	3.62152	1.67036e-06	upregulated	6.09525	9.52625e-18	upregulated	3.14137	9.72997e-05	upregulated	2.20526	0.000676698	upregulated	4.30429	3.10186e-13	upregulated	-0.259109	0.79852
ASPWEDRAFT_41219	1.13526	0.00657289	upregulated	1.28671	0.000822506	upregulated	2.54565	1.24931e-12	upregulated	1.03118	0.0121208	upregulated	1.26875	0.0011117	upregulated	0.788639	0.0459624		1.36758	0.000450819	upregulated
ASPWEDRAFT_41654	1.33351	0.0404177	upregulated	1.21126	0.0451671	upregulated	2.83776	2.23034e-07	upregulated	1.52234	0.0128571	upregulated	0.555167	0.40587		1.0608	0.0779587		0.0204863	0.984706
ASPWEDRAFT_42539	2.45287	0.00881546	upregulated	2.94998	0.000616825	upregulated	4.81467	3.58585e-09	upregulated	2.17649	0.0181676	upregulated	1.58254	0.0894191		1.85552	0.0371042	upregulated	0.0673277	0.958812
ASPWEDRAFT_45132	1.17122	0.0255251	upregulated	1.24887	0.00951966	upregulated	1.05013	0.0263221	upregulated	1.09772	0.0301909	upregulated	-0.272143	0.634989		-0.7926	0.112384		-0.182789	0.778697
ASPWEDRAFT_46964	1.15822	0.00506626	upregulated	1.26545	0.00073925	upregulated	1.16748	0.00168742	upregulated	1.42558	0.00023638	upregulated	-0.130843	0.783274		0.212328	0.630131		0.104952	0.845627
ASPWEDRAFT_51317	1.23098	0.00672149	upregulated	1.01877	0.0191291	upregulated	2.1645	5.77145e-08	upregulated	1.63436	0.000135242	upregulated	0.784088	0.0829596		0.737284	0.0956969		0.803611	0.0802709
ASPWEDRAFT_52622	1.5379	0.000861073	upregulated	2.63864	2.42308e-10	upregulated	4.34032	2.18732e-27	upregulated	1.40368	0.00218666	upregulated	1.97784	3.8435e-06	upregulated	3.56627	6.31595e-19	upregulated	-0.112772	0.855385
ASPWEDRAFT_53868	1.58201	0.00232526	upregulated	2.86647	1.90155e-10	upregulated	3.74065	7.614e-18	upregulated	1.19396	0.025005	upregulated	2.05606	3.55703e-06	upregulated	2.93248	2.2094e-12	upregulated	-0.135227	0.842517
ASPWEDRAFT_600363	1.3156	0.0079746	upregulated	2.06232	2.84049e-06	upregulated	4.42172	1.32039e-26	upregulated	1.3781	0.00402453	upregulated	1.09531	0.0196942	upregulated	2.69213	1.89869e-10	upregulated	0.450981	0.405157
ASPWEDRAFT_61416	2.19901	2.26577e-07	upregulated	2.22535	4.48145e-08	upregulated	1.90521	3.11562e-06	upregulated	1.52308	0.000762595	upregulated	0.220441	0.639322		0.872035	0.0234602		-0.698364	0.132577
ASPWEDRAFT_62138	3.69332	0.000370732	upregulated	6.73794	1.50518e-13	upregulated	8.40343	2.90403e-21	upregulated	2.84365	0.00887413	upregulated	2.12619	0.000597783	upregulated	3.73211	4.62181e-11	upregulated	-1.29514	0.148597
ASPWEDRAFT_63497	1.70726	0.00797389	upregulated	2.31688	2.6234e-05	upregulated	2.79726	1.16016e-07	upregulated	1.40231	0.0318665	upregulated	0.64171	0.263402		1.32874	0.00628403	upregulated	-0.59307	0.414907
ASPWEDRAFT_662218	1.97072	0.00526819	upregulated	2.73622	2.17434e-05	upregulated	3.86582	4.08052e-10	upregulated	4.33769	9.49944e-12	upregulated	1.41218	0.0420142	upregulated	0.826389	0.249191		1.45932	0.038061	upregulated
ASPWEDRAFT_67580	2.55288	0.00022916	upregulated	3.47348	5.88074e-08	upregulated	3.00637	2.29644e-06	upregulated	1.59071	0.0293387	upregulated	1.29356	0.0557917		1.47084	0.0232636	upregulated	-0.829453	0.274507
ASPWEDRAFT_679004	2.50173	1.60151e-12	upregulated	2.22998	1.81978e-10	upregulated	2.51282	1.9764e-13	upregulated	2.25631	3.44625e-10	upregulated	1.41102	4.62065e-05	upregulated	2.84312	8.27287e-19	upregulated	1.90812	1.81226e-08	upregulated
ASPWEDRAFT_739914	3.11258	0.0344784	upregulated	3.55924	0.00639065	upregulated	3.71426	0.00325748	upregulated	3.1388	0.0253278	upregulated	3.09676	0.00130338	upregulated	2.03752	0.0381892	upregulated	2.14681	0.0372603	upregulated
ASPWEDRAFT_743238	2.6779	0.0285435	upregulated	3.16995	0.00298868	upregulated	4.21935	2.42987e-05	upregulated	2.82	0.014763	upregulated	-0.322066	0.769325		0.974397	0.255816		0.865156	0.371581
ASPWEDRAFT_82528	1.71925	0.000132196	upregulated	1.39739	0.00143327	upregulated	1.37843	0.00127956	upregulated	1.10966	0.0178828	upregulated	0.468754	0.343929		0.225733	0.665206		0.209059	0.717274
ASPWEDRAFT_173770	1.2663	0.0102817	upregulated	1.75536	5.33534e-05	upregulated	2.56174	4.73887e-10	upregulated	-1.48716	0.0153982	downregulated	0.804012	0.0837369		1.98652	1.03606e-06	upregulated	-1.8213	0.00100948	downregulated
ASPWEDRAFT_59532	1.04781	0.00251139	upregulated	2.75272	2.97007e-20	upregulated	4.86038	7.62188e-64	upregulated	-1.40515	0.000168417	downregulated	1.11095	0.000598496	upregulated	3.37221	5.59011e-31	upregulated	-2.81803	8.80003e-13	downregulated
ASPWEDRAFT_100010	1.71727	0.0236458	upregulated	4.0516	7.4041e-11	upregulated	2.71572	1.97142e-05	upregulated	0.233761	0.814484		3.02933	4.8408e-07	upregulated	2.76966	2.699e-06	upregulated	-1.67694	0.0449732	downregulated
ASPWEDRAFT_101017	1.49842	0.00017377	upregulated	1.08161	0.00589729	upregulated	2.08572	7.71222e-09	upregulated	0.0813444	0.887512		-0.338032	0.450456		0.754923	0.0511472		-0.490622	0.275295
ASPWEDRAFT_102307	2.14278	4.81451e-14	upregulated	1.35316	2.97779e-06	upregulated	1.26288	1.06199e-05	upregulated	0.334931	0.358355		-0.433452	0.176143		0.256923	0.429711		-1.03211	0.000696424	downregulated
ASPWEDRAFT_103510	1.70795	0.000904481	upregulated	1.24497	0.0136377	upregulated	2.63027	7.56654e-09	upregulated	0.490768	0.421988		-0.233789	0.691332		0.835425	0.0869735		-0.953663	0.0839429
ASPWEDRAFT_105089	2.33867	3.80311e-05	upregulated	2.13348	9.41199e-05	upregulated	3.73003	2.31719e-13	upregulated	0.826945	0.216848		0.586395	0.315472		1.29758	0.0112894	upregulated	-1.0872	0.0729227
ASPWEDRAFT_105638	1.41778	0.0124074	upregulated	2.53447	1.01794e-07	upregulated	2.8754	5.01741e-10	upregulated	0.762351	0.216128		0.635519	0.238238		1.82225	5.36105e-05	upregulated	-0.0593848	0.938474
ASPWEDRAFT_107169	1.29239	0.0279024	upregulated	5.04207	1.24938e-26	upregulated	5.99058	4.11645e-38	upregulated	0.823472	0.172223		4.38222	1.64713e-20	upregulated	5.71831	8.05942e-36	upregulated	1.75503	0.000644286	upregulated
ASPWEDRAFT_108783	1.482	0.000181975	upregulated	1.69491	3.48364e-06	upregulated	3.57394	2.76542e-26	upregulated	0.119398	0.832085		0.0592688	0.904527		1.79447	9.45157e-08	upregulated	-0.706593	0.107684
ASPWEDRAFT_108977	1.22327	9.84476e-05	upregulated	1.03864	0.00064069	upregulated	3.59298	1.3153e-38	upregulated	0.138225	0.734243		0.159578	0.665981		1.99465	2.13618e-12	upregulated	-0.764166	0.0204135
ASPWEDRAFT_109388	2.07212	0.00994147	upregulated	1.84348	0.0145447	upregulated	3.05863	7.98107e-06	upregulated	0.143208	0.906467		-0.00454404	0.995925		1.66452	0.00949303	upregulated	-1.11414	0.197477
ASPWEDRAFT_111076	1.20504	2.71465e-07	upregulated	1.09071	1.62503e-06	upregulated	1.37584	3.97835e-10	upregulated	0.496146	0.0582753		0.16172	0.560437		0.64828	0.00498939		0.418047	0.103662
ASPWEDRAFT_111137	1.05283	0.0387855	upregulated	1.7654	5.77695e-05	upregulated	2.21091	1.74202e-07	upregulated	-0.204474	0.738475		0.60569	0.223593		2.57208	8.14555e-10	upregulated	-0.586955	0.270457
ASPWEDRAFT_111164	1.02767	0.00587497	upregulated	1.9285	6.95842e-09	upregulated	2.85508	6.05471e-19	upregulated	-0.523797	0.182672		-0.189338	0.653752		1.5439	4.33948e-06	upregulated	-0.797929	0.0316221
ASPWEDRAFT_111901	1.81728	1.23186e-06	upregulated	2.49144	1.50384e-12	upregulated	3.08695	2.22892e-19	upregulated	0.490684	0.267863		-0.0224803	0.965325		1.15694	0.00134458	upregulated	-1.22847	0.00183676	downregulated
ASPWEDRAFT_114390	1.38324	0.00825166	upregulated	1.24111	0.0116114	upregulated	2.69077	1.27797e-09	upregulated	0.47238	0.429657		-0.340494	0.552484		1.18735	0.0105766	upregulated	-0.569119	0.326007
ASPWEDRAFT_114947	1.13765	0.0470019	upregulated	1.32973	0.0067054	upregulated	2.09975	2.64817e-06	upregulated	0.336206	0.626503		0.375813	0.502306		1.77311	2.6376e-05	upregulated	-0.810494	0.217096
ASPWEDRAFT_115097	1.28914	0.0231793	upregulated	1.1432	0.0321347	upregulated	1.86525	0.000164736	upregulated	0.443888	0.475396		-0.229746	0.716759		0.225589	0.719975		-0.122023	0.866046
ASPWEDRAFT_115815	1.04073	0.0018747	upregulated	1.41994	1.5428e-06	upregulated	2.58126	4.3601e-21	upregulated	0.839656	0.0136906		0.76844	0.0138419		1.60913	5.0465e-09	upregulated	0.0445865	0.92344
ASPWEDRAFT_115989	1.04455	0.0414127	upregulated	2.20827	1.08457e-07	upregulated	3.70841	2.77441e-21	upregulated	0.923707	0.0638545		1.38241	0.00137338	upregulated	2.53126	1.16929e-10	upregulated	-0.339497	0.567627
ASPWEDRAFT_116018	1.07033	0.000233436	upregulated	1.56297	2.05778e-09	upregulated	1.85693	2.33301e-13	upregulated	0.890622	0.00252444		0.640781	0.0239747		1.47223	4.1983e-09	upregulated	-0.0628838	0.877208
ASPWEDRAFT_116328	1.11263	0.0118354	upregulated	2.42009	2.30935e-10	upregulated	3.81547	2.73356e-25	upregulated	0.567973	0.224209		1.17394	0.00419893	upregulated	2.24126	3.02689e-09	upregulated	0.063537	0.915062
ASPWEDRAFT_116810	2.25976	3.85509e-08	upregulated	1.51746	0.000251003	upregulated	2.99916	5.15807e-15	upregulated	0.652563	0.184209		0.106087	0.83465		-0.0208933	0.971508		0.478534	0.30046
ASPWEDRAFT_117312	1.22879	0.00251157	upregulated	1.34639	0.00034589	upregulated	1.32641	0.000326121	upregulated	0.324943	0.496401		-0.526409	0.220778		0.627309	0.110986		-0.396123	0.3928
ASPWEDRAFT_117492	1.69842	0.000474881	upregulated	2.14657	1.95773e-06	upregulated	1.4797	0.00118543	upregulated	-0.823931	0.134497		0.16299	0.776267		0.632001	0.201852		-2.53467	3.8861e-07	downregulated
ASPWEDRAFT_117684	1.97259	8.17711e-05	upregulated	2.83028	3.75795e-10	upregulated	4.38304	2.27286e-24	upregulated	0.835485	0.148946		0.747531	0.12005		2.5071	6.36593e-10	upregulated	-1.04394	0.0550747
ASPWEDRAFT_118302	1.10182	1.71903e-07	upregulated	1.59486	8.56219e-16	upregulated	1.69897	3.01953e-18	upregulated	-0.435121	0.072199		0.448082	0.0442365		1.1669	4.34393e-09	upregulated	-0.831537	0.000175522
ASPWEDRAFT_119102	1.76912	2.67484e-13	upregulated	3.36337	5.9718e-48	upregulated	4.0172	2.54594e-69	upregulated	-0.446459	0.11302		0.728447	0.00484984		2.4732	2.35378e-26	upregulated	-1.58536	1.35085e-10	downregulated
ASPWEDRAFT_119809	1.36494	2.07485e-06	upregulated	1.06407	0.000158822	upregulated	1.51891	1.2728e-08	upregulated	-0.335927	0.372419		-0.165532	0.628233		0.661167	0.0163673		-1.51854	2.81259e-06	downregulated
ASPWEDRAFT_120587	1.16654	0.0100661	upregulated	2.12534	9.42672e-08	upregulated	3.26573	1.07256e-17	upregulated	0.226775	0.677325		0.468372	0.319658		1.65787	3.24612e-05	upregulated	-0.401906	0.427799
ASPWEDRAFT_120956	2.7287	1.42534e-05	upregulated	2.23942	0.000276417	upregulated	1.4137	0.0273828	upregulated	-0.761369	0.414555		-1.71381	0.00707606	downregulated	-0.215419	0.757979		-2.94962	8.93632e-05	downregulated
ASPWEDRAFT_123002	1.47491	2.8675e-05	upregulated	1.58104	1.6883e-06	upregulated	2.62124	2.93388e-17	upregulated	-0.859971	0.0578062		-0.393178	0.313447		1.48987	1.25508e-06	upregulated	-1.52163	0.000130925	downregulated
ASPWEDRAFT_147616	1.05646	0.0012427	upregulated	1.76578	2.81688e-09	upregulated	3.60979	2.94569e-37	upregulated	0.493197	0.159983		0.48487	0.154351		1.6872	1.10788e-08	upregulated	-0.457418	0.196208
ASPWEDRAFT_153987	1.36998	0.000111674	upregulated	2.03205	4.31505e-10	upregulated	2.4272	1.93475e-14	upregulated	-0.104637	0.829656		-0.292832	0.466978		1.45798	7.17102e-06	upregulated	-0.935815	0.0122624
ASPWEDRAFT_155983	1.79682	0.00611347	upregulated	2.23667	9.21401e-05	upregulated	2.34073	2.82026e-05	upregulated	0.739999	0.346486		0.449617	0.463401		1.23261	0.0135242	upregulated	-1.27802	0.0913491
ASPWEDRAFT_165370	4.09916	0.0071689	upregulated	3.9863	0.00506754	upregulated	4.47643	0.00103461	upregulated	2.82934	0.0793691		1.12398	0.253381		1.28089	0.167957		-0.263274	0.845392
ASPWEDRAFT_166286	2.58299	1.00948e-05	upregulated	1.47762	0.0153499	upregulated	1.87481	0.00106849	upregulated	-0.030905	0.978051		-0.640272	0.281126		0.0514544	0.941051		-1.9722	0.00245622	downregulated
ASPWEDRAFT_167930	1.53361	0.00306462	upregulated	1.97994	3.2053e-05	upregulated	2.62284	1.03296e-08	upregulated	0.471355	0.419833		0.968102	0.0600758		1.1454	0.0198766	upregulated	-0.75244	0.170155
ASPWEDRAFT_168723	1.87002	0.00999786	upregulated	3.02029	9.8182e-07	upregulated	2.66914	1.50397e-05	upregulated	0.832087	0.319109		0.356213	0.623754		2.19041	6.59778e-05	upregulated	-1.81293	0.0335261	downregulated
ASPWEDRAFT_171661	1.07785	0.0294374	upregulated	1.61085	0.00015874	upregulated	4.0837	7.13937e-26	upregulated	-0.414836	0.478794		1.19806	0.00611897	upregulated	2.86542	2.05389e-13	upregulated	-0.916572	0.0787707
ASPWEDRAFT_172018	2.00136	7.66604e-07	upregulated	2.60324	3.51432e-12	upregulated	3.02239	1.07788e-16	upregulated	0.162481	0.787447		0.715333	0.0654777		1.80126	1.06928e-07	upregulated	-0.991661	0.0246915
ASPWEDRAFT_173344	1.19162	0.0143775	upregulated	2.16202	3.96643e-07	upregulated	1.14532	0.00920143	upregulated	0.506739	0.336438		0.991079	0.0318294		-0.0135659	0.983954		-0.361339	0.513682
ASPWEDRAFT_173462	1.01904	0.00335149	upregulated	1.0503	0.0012617	upregulated	2.16402	9.81171e-13	upregulated	0.822019	0.0180511		0.39158	0.287288		0.349112	0.333588		0.226847	0.580615
ASPWEDRAFT_174770	4.27376	0.0293368	upregulated	4.80693	0.0053225	upregulated	7.78424	7.61711e-07	upregulated	2.44205	0.295929		1.9366	0.141414		3.2473	0.00572259	upregulated	-0.571956	0.779225
ASPWEDRAFT_175335	3.09025	1.39941e-31	upregulated	1.98842	2.98531e-13	upregulated	3.61045	2.15042e-45	upregulated	0.690433	0.0432068		1.03921	1.57345e-05	upregulated	1.91157	9.80278e-18	upregulated	0.497801	0.0616041
ASPWEDRAFT_175757	1.18994	0.00251209	upregulated	2.4024	2.38015e-12	upregulated	3.51314	1.91396e-26	upregulated	-0.958658	0.0325719		1.86192	9.02381e-08	upregulated	2.84934	4.45833e-18	upregulated	-0.220023	0.647657
ASPWEDRAFT_176038	2.14044	0.00407181	upregulated	2.27572	0.00107303	upregulated	4.22101	9.5389e-11	upregulated	0.917127	0.256565		1.25224	0.0916525		2.32312	0.000646654	upregulated	-0.550795	0.52129
ASPWEDRAFT_176420	2.76017	0.0395247	upregulated	3.4165	0.00300561	upregulated	2.70119	0.0214533	upregulated	1.59853	0.284518		1.58838	0.0572727		0.941041	0.284011		-0.50449	0.697759
ASPWEDRAFT_177013	1.94191	0.0214375	upregulated	1.98817	0.00912428	upregulated	2.75233	0.000102231	upregulated	1.23454	0.16877		0.445755	0.57884		1.2626	0.0582666		-0.708439	0.443402
ASPWEDRAFT_177230	1.42982	0.00346693	upregulated	1.25201	0.00663726	upregulated	3.89037	3.51407e-22	upregulated	0.233992	0.714178		0.703668	0.135703		2.50745	1.96116e-10	upregulated	-0.812145	0.130322
ASPWEDRAFT_179271	1.83667	0.00690394	upregulated	3.42046	6.10069e-09	upregulated	5.11189	1.22656e-19	upregulated	0.539442	0.503184		1.22972	0.0488962	upregulated	4.04216	1.01195e-13	upregulated	-2.344	0.0022994	downregulated
ASPWEDRAFT_183404	2.84156	0.00170339	upregulated	2.01836	0.0247958	upregulated	3.81843	1.92158e-06	upregulated	1.61213	0.104643		-0.344105	0.71303		1.34114	0.0724775		-0.760296	0.424801
ASPWEDRAFT_184120	2.2808	0.0114837	upregulated	1.76023	0.0429476	upregulated	3.03918	9.06691e-05	upregulated	0.100588	0.944979		-0.10878	0.912162		1.35717	0.0588765		-2.9295	0.0164682	downregulated
ASPWEDRAFT_185712	2.2289	3.59311e-05	upregulated	2.02361	8.74266e-05	upregulated	2.12679	2.45093e-05	upregulated	0.272856	0.736978		-0.281604	0.62369		0.969167	0.030079		-0.41876	0.490394
ASPWEDRAFT_188429	2.12012	0.0122842	upregulated	2.01848	0.0102562	upregulated	3.58883	5.38209e-07	upregulated	-0.271856	0.824111		1.05565	0.169412		1.91305	0.0054908	upregulated	-1.12274	0.213102
ASPWEDRAFT_207582	1.83091	0.0201901	upregulated	4.74329	1.96629e-13	upregulated	6.54997	1.10302e-25	upregulated	1.2742	0.115348		1.8872	0.00419882	upregulated	4.57781	1.08653e-14	upregulated	-0.795706	0.352486
ASPWEDRAFT_22594	1.51364	1.88679e-05	upregulated	2.88392	1.08937e-18	upregulated	1.71124	2.43081e-07	upregulated	0.538682	0.172386		1.36603	9.04464e-05	upregulated	0.547317	0.13933		-0.515651	0.190693
ASPWEDRAFT_22751	2.92835	0.000904961	upregulated	3.06267	0.000200217	upregulated	4.72826	8.85107e-10	upregulated	1.41851	0.158096		0.675461	0.411273		1.54079	0.0305913	upregulated	-1.19278	0.185296
ASPWEDRAFT_24177	1.54901	0.00643315	upregulated	1.18052	0.0315052	upregulated	3.03413	6.26684e-10	upregulated	0.948887	0.106551		1.27586	0.0179175	upregulated	1.79376	0.000409366	upregulated	0.3292	0.619767
ASPWEDRAFT_25222	2.12704	9.9825e-05	upregulated	2.09261	4.42083e-05	upregulated	3.10671	7.17898e-11	upregulated	0.705058	0.309542		-0.0740144	0.905462		0.983958	0.0250852		-1.07938	0.071203
ASPWEDRAFT_25241	1.23454	0.000417492	upregulated	2.20312	2.30229e-12	upregulated	2.841	1.22379e-20	upregulated	0.95049	0.00775073		0.407909	0.274702		1.99673	9.36973e-11	upregulated	-0.699881	0.0618711
ASPWEDRAFT_25307	1.20974	0.0181072	upregulated	1.36139	0.00334919	upregulated	2.19432	4.35103e-07	upregulated	0.991495	0.0507345		0.335914	0.536099		0.958471	0.0388742		-0.115362	0.861654
ASPWEDRAFT_25648	1.98905	0.0434571	upregulated	3.60367	6.02477e-06	upregulated	4.29351	2.27273e-08	upregulated	-0.938913	0.537277		1.20284	0.12602		2.63929	9.64367e-05	upregulated	-1.87719	0.108337
ASPWEDRAFT_25837	1.61585	0.0087286	upregulated	1.24875	0.0339981	upregulated	3.49234	1.06049e-12	upregulated	-0.508259	0.572846		-0.461655	0.476137		1.25468	0.00939436	upregulated	-1.48514	0.0430171	downregulated
ASPWEDRAFT_26202	1.08947	0.000109307	upregulated	1.28448	1.3828e-06	upregulated	1.96428	1.44269e-14	upregulated	0.872127	0.00219353		0.112733	0.740363		0.402378	0.17088		0.260112	0.430306
ASPWEDRAFT_26696	1.08829	1.58322e-05	upregulated	2.23995	3.84946e-22	upregulated	3.24902	7.2438e-47	upregulated	-0.00458626	0.992553		0.90475	0.000302358		1.82754	3.85025e-15	upregulated	-0.780816	0.00257468
ASPWEDRAFT_27397	2.50997	0.0134817	upregulated	2.69963	0.00311508	upregulated	3.8524	5.27791e-06	upregulated	1.01297	0.412994		-0.434013	0.651378		-0.793975	0.375563		-1.5533	0.156891
ASPWEDRAFT_27787	1.35472	0.00403584	upregulated	1.34324	0.00200696	upregulated	2.55728	1.01071e-10	upregulated	0.368361	0.519526		0.305781	0.540852		0.720464	0.0938477		-0.178656	0.767894
ASPWEDRAFT_28331	1.81594	0.00492271	upregulated	4.32902	2.67595e-14	upregulated	3.9031	4.10426e-12	upregulated	0.658092	0.354624		2.70548	5.78533e-06	upregulated	3.11661	6.12966e-08	upregulated	-0.682896	0.333641
ASPWEDRAFT_283810	1.19465	4.12726e-06	upregulated	1.30886	1.42494e-07	upregulated	2.64082	4.24873e-29	upregulated	0.368797	0.21132		0.896845	0.000562515		1.38829	1.42863e-08	upregulated	0.577121	0.0360493
ASPWEDRAFT_29421	1.25093	2.40508e-07	upregulated	1.24401	1.28697e-07	upregulated	1.08699	3.08339e-06	upregulated	-0.576374	0.0284628		-0.755811	0.00250486		0.438114	0.0862352		-1.16402	1.78536e-06	downregulated
ASPWEDRAFT_30386	2.79665	0.000451654	upregulated	2.19156	0.00504203	upregulated	4.5427	2.85942e-11	upregulated	1.33246	0.161843		0.397443	0.556605		2.20626	1.2164e-05	upregulated	-1.52541	0.0662671
ASPWEDRAFT_31051	1.8776	1.21353e-07	upregulated	1.18432	0.00093505	upregulated	1.04321	0.00309224	upregulated	0.0350255	0.948549		-0.813036	0.030573		-0.872657	0.0161693		-1.42357	0.000101133	downregulated
ASPWEDRAFT_31947	1.69305	0.00772045	upregulated	2.32979	3.52734e-05	upregulated	1.95064	0.000540256	upregulated	1.03819	0.120852		-0.454264	0.504316		-0.15618	0.827001		0.289882	0.696594
ASPWEDRAFT_32160	2.53501	0.000772264	upregulated	3.3181	1.36125e-06	upregulated	5.21948	1.18056e-15	upregulated	0.767476	0.404184		1.19056	0.0856118		2.95817	1.35157e-06	upregulated	-1.63567	0.0403846	downregulated
ASPWEDRAFT_32492	1.39626	0.00446384	upregulated	1.37392	0.00262368	upregulated	1.94784	5.97848e-06	upregulated	0.631137	0.244158		-0.468527	0.374422		0.00967316	0.988861		-0.700031	0.190196
ASPWEDRAFT_32825	1.19297	4.00094e-07	upregulated	1.48047	2.35221e-11	upregulated	2.31738	9.18366e-28	upregulated	0.272883	0.341689		-0.369846	0.155657		0.846476	0.000162278		-0.761545	0.00275875
ASPWEDRAFT_32947	1.49841	0.00949375	upregulated	2.56779	1.89616e-07	upregulated	2.90728	1.28094e-09	upregulated	0.994644	0.0988426		0.934969	0.0759417		2.83134	2.98008e-10	upregulated	0.531482	0.375862
ASPWEDRAFT_337290	1.30611	8.25545e-05	upregulated	2.65414	2.28117e-18	upregulated	3.28733	1.93009e-28	upregulated	0.584326	0.102298		1.58249	7.31246e-07	upregulated	2.12746	3.27177e-12	upregulated	0.0699657	0.879078
ASPWEDRAFT_35053	1.26385	0.00370573	upregulated	1.04172	0.0126044	upregulated	2.3004	1.56674e-09	upregulated	-0.101158	0.86134		0.981375	0.0197998		1.74054	7.66949e-06	upregulated	-0.89862	0.0442206
ASPWEDRAFT_352871	1.77657	0.00448744	upregulated	5.34491	1.92035e-25	upregulated	6.64231	8.40098e-40	upregulated	1.09622	0.0999567		4.23512	1.72444e-18	upregulated	4.60723	1.2171e-22	upregulated	-1.0639	0.11839
ASPWEDRAFT_36353	4.45991	1.78763e-24	upregulated	1.86143	0.000112367	upregulated	4.74958	4.42977e-29	upregulated	-0.978728	0.22609		-2.48272	3.40542e-10	downregulated	1.29588	0.000162817	upregulated	-2.95999	8.78084e-12	downregulated
ASPWEDRAFT_36357	5.06799	0.005044	upregulated	5.44618	0.000986615	upregulated	5.11913	0.0017381	upregulated	1.59091	0.535366		-0.503523	0.736186		1.78825	0.112462		-1.98	0.267468
ASPWEDRAFT_36384	1.38808	1.5407e-05	upregulated	2.46954	9.23542e-17	upregulated	3.46173	5.40423e-33	upregulated	-0.300293	0.436006		-0.131674	0.737009		2.25566	2.24326e-14	upregulated	-1.10128	0.000781488	downregulated
ASPWEDRAFT_36734	2.82534	2.91552e-08	upregulated	2.0781	4.83319e-05	upregulated	3.90987	6.8141e-17	upregulated	1.17527	0.0517067		0.147486	0.790107		0.631931	0.174612		-0.0849959	0.897285
ASPWEDRAFT_36804	1.3634	0.000935645	upregulated	2.00263	1.15379e-07	upregulated	1.88969	3.96562e-07	upregulated	0.826593	0.0543955		-0.0771047	0.879153		0.315811	0.482172		-0.24193	0.630501
ASPWEDRAFT_370663	1.47156	5.24527e-06	upregulated	1.60946	2.04312e-07	upregulated	2.1573	5.53028e-13	upregulated	-0.396415	0.292406		0.150918	0.701279		1.60175	1.73551e-07	upregulated	-1.73921	5.87471e-08	downregulated
ASPWEDRAFT_38058	3.04784	0.0149512	upregulated	3.0814	0.00692877	upregulated	5.49794	7.98249e-08	upregulated	1.00061	0.545886		-0.95672	0.35884		1.24673	0.0970171		-3.29048	0.0387533	downregulated
ASPWEDRAFT_38525	1.98737	3.60818e-05	upregulated	2.90348	5.7775e-11	upregulated	4.49206	5.12795e-26	upregulated	0.0751273	0.918219		1.18866	0.0107206	upregulated	3.08008	1.84892e-13	upregulated	-1.26161	0.0133639	downregulated
ASPWEDRAFT_38696	1.96534	0.0152534	upregulated	2.8813	2.46244e-05	upregulated	5.47042	2.21991e-18	upregulated	1.54129	0.0634521		1.52411	0.0124482	upregulated	3.18677	2.4123e-09	upregulated	-0.231033	0.810885
ASPWEDRAFT_38808	1.86352	1.7427e-10	upregulated	1.10617	0.000197213	upregulated	1.39488	1.10627e-06	upregulated	0.775825	0.0153708		-0.0918381	0.808057		-0.0507999	0.897215		-0.00734987	0.99095
ASPWEDRAFT_38993	1.00141	4.89307e-06	upregulated	1.73189	6.38091e-18	upregulated	1.09755	8.40408e-08	upregulated	0.666932	0.0036147		0.240024	0.329995		0.440488	0.0459989		0.0121684	0.972283
ASPWEDRAFT_39446	1.90383	0.000119338	upregulated	1.53754	0.00140109	upregulated	3.30489	2.61158e-14	upregulated	0.0328889	0.968463		0.52139	0.301317		1.51669	0.000381911	upregulated	-0.534257	0.340066
ASPWEDRAFT_40219	1.33584	0.0265221	upregulated	2.13781	1.42016e-05	upregulated	3.67665	4.31988e-16	upregulated	-0.677898	0.417062		1.08465	0.029058	upregulated	2.35346	3.62634e-08	upregulated	-1.52216	0.0397181	downregulated
ASPWEDRAFT_40317	1.04071	0.0218097	upregulated	1.08081	0.00946644	upregulated	2.10586	3.98936e-08	upregulated	0.967773	0.0280823		0.566224	0.209553		1.00886	0.0136656	upregulated	0.105255	0.855492
ASPWEDRAFT_41204	2.20212	9.81787e-05	upregulated	2.84679	6.23919e-08	upregulated	4.61469	3.5702e-20	upregulated	0.0612427	0.944257		1.01317	0.0719838		2.76783	2.93207e-08	upregulated	-1.80221	0.00236856	downregulated
ASPWEDRAFT_42878	1.46956	1.42439e-05	upregulated	1.27452	8.88382e-05	upregulated	2.08392	5.09701e-12	upregulated	0.189532	0.688909		0.239183	0.521811		0.365591	0.280549		-0.0535467	0.911578
ASPWEDRAFT_430380	1.22238	1.22606e-05	upregulated	2.1778	1.89919e-17	upregulated	4.50549	4.3157e-75	upregulated	-0.261297	0.448966		0.125718	0.709911		2.42446	2.67159e-22	upregulated	-1.39985	1.35118e-06	downregulated
ASPWEDRAFT_43150	1.32615	4.98577e-09	upregulated	1.32436	2.21094e-09	upregulated	1.8405	8.97171e-18	upregulated	-0.089235	0.770083		0.426651	0.0861559		1.06318	1.9583e-06	upregulated	-0.319472	0.224805
ASPWEDRAFT_43361	1.78443	4.6948e-05	upregulated	1.94464	2.72423e-06	upregulated	3.04529	1.2907e-14	upregulated	0.15566	0.791544		1.34962	0.00142535	upregulated	2.70363	4.27896e-12	upregulated	-0.705332	0.142064
ASPWEDRAFT_43366	1.98264	6.79529e-09	upregulated	1.65061	1.05225e-06	upregulated	2.35773	4.37882e-13	upregulated	0.204795	0.643752		-0.331328	0.411874		1.41017	3.29208e-05	upregulated	-0.862838	0.0194336
ASPWEDRAFT_44636	1.86661	0.0427447	upregulated	2.70777	0.000403839	upregulated	4.13472	5.72234e-09	upregulated	1.0479	0.298344		0.320829	0.714223		1.55842	0.0194576	upregulated	0.273005	0.787441
ASPWEDRAFT_44672	1.02644	0.00506626	upregulated	1.74396	2.55073e-08	upregulated	2.90386	5.53898e-23	upregulated	-0.469742	0.297176		0.553339	0.121004		2.8435	2.3421e-23	upregulated	-1.09678	0.00739985	downregulated
ASPWEDRAFT_449492	1.35688	0.00127222	upregulated	1.54763	7.31676e-05	upregulated	1.10317	0.00517571	upregulated	0.48769	0.305946		0.964034	0.0176898		0.790251	0.0490133		0.983171	0.0172521
ASPWEDRAFT_46990	1.38201	0.0217583	upregulated	3.34493	1.14903e-10	upregulated	3.60605	1.3526e-12	upregulated	0.853221	0.163884		1.69578	0.00230315	upregulated	2.51501	1.72922e-06	upregulated	1.16923	0.045662	upregulated
ASPWEDRAFT_47305	1.61178	0.000515781	upregulated	1.93688	8.19431e-06	upregulated	2.5539	1.08961e-09	upregulated	0.947953	0.0507703		0.645846	0.188432		0.790832	0.0890922		0.578315	0.255775
ASPWEDRAFT_47992	1.71533	1.98738e-17	upregulated	1.46636	2.88035e-13	upregulated	2.22458	1.96843e-30	upregulated	0.826541	0.000147303		-0.26711	0.25972		0.688564	0.000899624		-0.271112	0.265066
ASPWEDRAFT_48044	1.70151	2.42402e-06	upregulated	2.35648	4.25325e-12	upregulated	3.11542	4.27044e-21	upregulated	0.17562	0.711555		1.02725	0.00494126	upregulated	1.97147	5.32909e-09	upregulated	-0.594091	0.138382
ASPWEDRAFT_48977	1.19563	0.00262817	upregulated	1.07225	0.00422679	upregulated	1.99982	6.3465e-09	upregulated	0.0363208	0.950811		0.520108	0.196412		1.29361	0.00021739	upregulated	-0.277638	0.560329
ASPWEDRAFT_49405	1.20323	4.29763e-05	upregulated	1.43142	1.98173e-07	upregulated	1.92053	4.03329e-13	upregulated	-0.195582	0.60675		-0.659396	0.032077		1.3816	2.32804e-07	upregulated	-1.58278	4.38907e-07	downregulated
ASPWEDRAFT_49505	1.10843	0.00368678	upregulated	1.28239	0.000273208	upregulated	1.00277	0.0043201	upregulated	0.572227	0.156642		-0.277435	0.511891		0.010665	0.984226		-0.628227	0.117502
ASPWEDRAFT_50323	1.93888	0.000366692	upregulated	2.14083	2.26618e-05	upregulated	2.9193	1.29362e-09	upregulated	1.06846	0.0722276		1.25288	0.0115877	upregulated	1.52964	0.00116001	upregulated	0.346313	0.578208
ASPWEDRAFT_50808	1.46051	0.00116923	upregulated	1.39663	0.00108987	upregulated	2.2313	3.40246e-08	upregulated	0.203468	0.716455		0.0982682	0.859075		1.13739	0.00805962	upregulated	-0.800784	0.0893599
ASPWEDRAFT_50899	1.77361	0.00253809	upregulated	1.28159	0.0258081	upregulated	1.57904	0.00351438	upregulated	-0.895566	0.299818		0.00979275	0.989279		-0.336943	0.576554		-2.88997	0.000979082	downregulated
ASPWEDRAFT_51750	3.66481	0.0116752	upregulated	3.50779	0.00938185	upregulated	4.66323	0.000206021	upregulated	2.4513	0.117614		0.603195	0.501225		1.82139	0.01049	upregulated	-3.28615	0.0394438	downregulated
ASPWEDRAFT_51872	1.06712	0.00576878	upregulated	1.26284	0.000407518	upregulated	1.49051	1.54752e-05	upregulated	-0.21751	0.632199		-0.718345	0.0610888		0.341232	0.400667		-0.650842	0.100033
ASPWEDRAFT_51911	1.63728	8.90907e-05	upregulated	1.17266	0.00446851	upregulated	2.42301	2.03262e-10	upregulated	-0.207851	0.7		0.282612	0.556628		1.86843	1.38584e-06	upregulated	-0.774235	0.0839173
ASPWEDRAFT_52880	1.10665	0.000281943	upregulated	2.82562	5.487e-26	upregulated	4.21779	8.37318e-59	upregulated	0.120861	0.761717		-0.00875406	0.982694		1.39166	4.54953e-07	upregulated	-1.22754	9.82472e-05	downregulated
ASPWEDRAFT_53209	1.23527	0.0465377	upregulated	1.43383	0.00952486	upregulated	2.79265	3.46887e-08	upregulated	0.778016	0.218295		0.37851	0.554394		2.10149	4.16815e-05	upregulated	-0.39441	0.573224
ASPWEDRAFT_53737	1.9437	1.12271e-05	upregulated	2.28318	3.48301e-08	upregulated	3.42027	3.49792e-18	upregulated	-0.0722915	0.919183		0.684571	0.120529		1.95146	2.82518e-07	upregulated	-0.776988	0.109396
ASPWEDRAFT_54653	1.2806	0.00012641	upregulated	2.11144	2.24816e-12	upregulated	2.57132	1.58063e-18	upregulated	0.408194	0.294916		-0.347448	0.351178		1.01374	0.00100521	upregulated	-0.520145	0.16334
ASPWEDRAFT_54974	1.80681	1.37022e-07	upregulated	1.95572	2.40569e-09	upregulated	2.10717	5.23933e-11	upregulated	0.627974	0.114726		0.446813	0.225245		0.922864	0.00492264		0.265124	0.521762
ASPWEDRAFT_589904	3.19515	1.57384e-06	upregulated	2.02505	0.0031916	upregulated	1.51839	0.0319911	upregulated	1.24929	0.126826		-0.683588	0.271998		0.675156	0.220966		-1.82813	0.00732175	downregulated
ASPWEDRAFT_605355	1.77134	0.000405069	upregulated	2.27577	4.53131e-07	upregulated	3.13669	2.58403e-13	upregulated	-0.410335	0.571321		-0.0167642	0.978593		2.32965	3.27831e-09	upregulated	-2.48167	0.000191651	downregulated
ASPWEDRAFT_618612	1.35613	0.0181995	upregulated	1.64917	0.00146833	upregulated	1.11011	0.0342047	upregulated	-0.886234	0.161476		-0.257576	0.685553		1.25022	0.0153247	upregulated	-2.17172	0.000223341	downregulated
ASPWEDRAFT_619406	1.42847	0.0376848	upregulated	4.20558	7.74798e-15	upregulated	5.08892	5.27308e-22	upregulated	0.901493	0.206562		3.24011	8.40373e-10	upregulated	4.50729	3.0434e-19	upregulated	-0.315411	0.697637
ASPWEDRAFT_624000	2.31689	3.39986e-06	upregulated	1.6719	0.000737998	upregulated	3.63785	2.912e-15	upregulated	0.92434	0.0934516		-1.65941	0.00105676	downregulated	0.369837	0.516632		-2.29661	5.45213e-06	downregulated
ASPWEDRAFT_655724	1.01589	0.00297963	upregulated	3.35088	1.50502e-29	upregulated	3.9528	1.29771e-41	upregulated	0.0688736	0.880698		0.762795	0.0232353		2.56244	1.08929e-17	upregulated	-0.696711	0.0452498
ASPWEDRAFT_668873	3.48785	1.46183e-05	upregulated	3.22953	3.10966e-05	upregulated	4.99995	4.2314e-12	upregulated	-0.186614	0.907486		-0.299549	0.669996		1.29102	0.0158274	upregulated	-0.882049	0.222197
ASPWEDRAFT_68228	2.34961	0.0301497	upregulated	3.62575	5.98928e-05	upregulated	5.25255	6.73834e-10	upregulated	1.71041	0.127461		1.93849	0.0107182	upregulated	3.15355	5.04318e-06	upregulated	-0.850886	0.451482
ASPWEDRAFT_68564	3.28029	2.39339e-05	upregulated	2.41529	0.00186455	upregulated	2.59436	0.000556276	upregulated	1.10383	0.262627		0.654839	0.335347		0.648478	0.3212		0.0809553	0.928088
ASPWEDRAFT_685698	1.9824	0.00709736	upregulated	2.78811	1.01686e-05	upregulated	4.39628	7.66659e-14	upregulated	0.0716452	0.953521		0.703024	0.272133		2.59614	2.8944e-07	upregulated	-0.854192	0.288688
ASPWEDRAFT_733808	2.87718	0.00196539	upregulated	2.46908	0.00561021	upregulated	4.33251	1.10339e-07	upregulated	0.843178	0.466379		0.122431	0.905769		1.45019	0.0631859		-1.69806	0.07888
ASPWEDRAFT_741052	1.99539	0.000399829	upregulated	3.33255	3.96296e-11	upregulated	2.69086	1.06603e-07	upregulated	0.360588	0.619788		0.785822	0.159454		1.58788	0.00144342	upregulated	-0.449196	0.492814
ASPWEDRAFT_747560	2.61905	0.0232454	upregulated	4.12085	1.74039e-05	upregulated	3.82986	5.74228e-05	upregulated	1.61104	0.204406		0.664619	0.447364		1.88057	0.00724992	upregulated	-0.0510288	0.969409
ASPWEDRAFT_77359	1.3071	0.000595115	upregulated	2.76375	5.92822e-16	upregulated	3.97625	4.94699e-33	upregulated	0.255936	0.576417		1.82915	2.70378e-07	upregulated	2.84518	3.21626e-17	upregulated	-0.655365	0.106077
ASPWEDRAFT_99771	1.08341	0.00892858	upregulated	1.36334	0.000326365	upregulated	2.74128	1.37335e-14	upregulated	0.451296	0.310909		0.869607	0.0305727		1.43171	0.000139279	upregulated	0.746436	0.0729227
ASPWEDRAFT_99797	2.1151	4.79028e-06	upregulated	1.9054	1.91576e-05	upregulated	3.04714	2.26828e-13	upregulated	0.491082	0.416568		-0.3941	0.429031		1.40567	0.000329166	upregulated	-0.629588	0.217046
ASPWEDRAFT_99834	2.9097	3.78485e-08	upregulated	1.30955	0.0199361	upregulated	2.33178	5.78853e-06	upregulated	-0.00642585	0.995249		-0.489752	0.409652		0.276033	0.649708		-2.386	2.08401e-05	downregulated
ASPWEDRAFT_172672	2.97268	6.42841e-08	upregulated	2.77655	2.31579e-07	upregulated	0.219568	0.753435		2.92468	1.0527e-07	upregulated	-0.709353	0.237387		-0.877409	0.122782		0.0824823	0.915958
ASPWEDRAFT_25260	1.83156	3.31052e-05	upregulated	1.37402	0.00157681	upregulated	-0.529995	0.25749		2.23461	1.89571e-07	upregulated	0.00273844	0.996172		-1.24654	0.004175	downregulated	0.555333	0.261463
ASPWEDRAFT_35911	1.27987	0.00120029	upregulated	1.91563	4.83556e-08	upregulated	0.750447	0.0508304		2.06754	9.4082e-09	upregulated	-0.0983262	0.835064		-0.994636	0.0107579		0.55479	0.175075
ASPWEDRAFT_44660	3.46441	4.53282e-06	upregulated	1.95758	0.0121755	upregulated	0.85011	0.317655		3.39685	6.44241e-06	upregulated	0.716503	0.361734		-1.18105	0.110613		1.48844	0.0419597	upregulated
ASPWEDRAFT_297878	1.23667	0.00776613	upregulated	1.1829	0.00621227	upregulated	0.327283	0.506178		-1.10484	0.0383189	downregulated	-0.397123	0.42744		-0.198409	0.701455		-1.53648	0.00176952	downregulated
ASPWEDRAFT_104112	1.92713	4.68032e-08	upregulated	1.0819	0.00285626	upregulated	0.730811	0.0477658		0.283195	0.540534		-0.283538	0.487825		-0.192513	0.641319		0.40067	0.319228
ASPWEDRAFT_109613	1.55206	1.79134e-07	upregulated	1.15696	8.99442e-05	upregulated	0.921121	0.00169727		-0.491973	0.141746		-0.423073	0.203643		-0.103721	0.782733		-1.42383	1.81693e-06	downregulated
ASPWEDRAFT_111172	1.3341	0.00168574	upregulated	1.20296	0.00300022	upregulated	0.958441	0.0170131		0.763307	0.0864889		0.619786	0.157792		0.698687	0.0955909		0.396251	0.407826
ASPWEDRAFT_115250	2.27154	1.80432e-09	upregulated	1.01716	0.0101682	upregulated	0.278471	0.524736		0.484725	0.280928		-1.52108	8.94654e-05	downregulated	-0.839496	0.0338986		-1.71398	1.04005e-05	downregulated
ASPWEDRAFT_118180	1.02398	0.00068942	upregulated	1.73233	2.82477e-10	upregulated	0.507696	0.086719		-0.119919	0.755833		1.29388	5.8465e-06	upregulated	0.840738	0.00346582		0.134805	0.726164
ASPWEDRAFT_119957	2.73196	0.000137405	upregulated	2.89003	1.97048e-05	upregulated	0.0404241	0.9674		1.06737	0.197687		-1.10066	0.13297		-1.25038	0.0721151		-0.921372	0.230942
ASPWEDRAFT_144149	1.71701	0.000809762	upregulated	1.13188	0.0264295	upregulated	0.905421	0.0730952		-0.0047929	0.996244		-0.890329	0.0932481		0.996174	0.0390315		-0.789586	0.154818
ASPWEDRAFT_144775	1.52286	0.00436343	upregulated	1.04264	0.0464601	upregulated	0.634329	0.235041		0.273116	0.678052		-1.13464	0.0336426	downregulated	0.00224535	0.998029		-1.11468	0.0433315	downregulated
ASPWEDRAFT_174167	2.41313	2.6454e-07	upregulated	1.56302	0.00108477	upregulated	0.477134	0.396352		0.495534	0.432584		0.155824	0.765002		0.399136	0.387659		-1.11129	0.0260677	downregulated
ASPWEDRAFT_175777	1.60795	0.00298095	upregulated	1.59629	0.00177168	upregulated	0.743045	0.161982		-0.607691	0.310338		-0.72396	0.20027		0.967893	0.0664821		-1.02751	0.0635856
ASPWEDRAFT_22298	1.71489	0.00872786	upregulated	2.1254	0.000336894	upregulated	-0.417294	0.565282		1.00036	0.144395		-0.828325	0.218299		-0.183588	0.805369		-0.424215	0.575674
ASPWEDRAFT_22951	2.2583	1.97369e-05	upregulated	1.78872	0.000577549	upregulated	0.876916	0.103997		0.426945	0.505736		0.777294	0.172719		0.0269707	0.971649		0.0842898	0.911578
ASPWEDRAFT_27785	1.07324	0.00634548	upregulated	1.15928	0.00151927	upregulated	0.549772	0.147461		0.999304	0.00950228		0.587489	0.140954		-0.0804032	0.864958		-0.0697205	0.894464
ASPWEDRAFT_30792	1.66389	4.31834e-06	upregulated	1.53246	1.29295e-05	upregulated	0.995677	0.00509547		0.116893	0.809759		-0.282214	0.504667		0.984427	0.00610091		-1.13939	0.00234984	downregulated
ASPWEDRAFT_34988	1.31984	0.00106673	upregulated	1.36238	0.000358197	upregulated	0.445883	0.277313		0.675439	0.112655		0.321484	0.476137		0.0948024	0.846813		-0.0415428	0.942121
ASPWEDRAFT_375616	1.0686	0.000455837	upregulated	1.32058	3.48364e-06	upregulated	0.662712	0.0239357		0.598628	0.0616951		0.396007	0.224942		0.180566	0.602856		-0.359989	0.289737
ASPWEDRAFT_38043	1.39782	1.28794e-05	upregulated	1.18663	0.000150106	upregulated	0.477721	0.146739		-0.466189	0.195513		-0.821239	0.0127664		0.0487069	0.907329		-0.775885	0.0209531
ASPWEDRAFT_44795	1.15526	0.0445807	upregulated	1.0579	0.0462645	upregulated	0.937875	0.0698928		1.01855	0.0677101		0.687264	0.21856		-0.0514162	0.941739		1.26251	0.0169999	upregulated
ASPWEDRAFT_45219	1.22372	2.54316e-05	upregulated	1.36792	7.14531e-07	upregulated	0.199533	0.540113		0.364178	0.275339		-0.682417	0.0236991		-0.869615	0.00243546		-0.796601	0.00876092
ASPWEDRAFT_46543	1.85438	3.00063e-08	upregulated	1.37628	3.58181e-05	upregulated	0.040056	0.927517		-0.142648	0.756776		-0.270761	0.494305		-0.392405	0.287915		-1.41503	4.64989e-05	downregulated
ASPWEDRAFT_53001	1.70368	0.000135426	upregulated	1.43119	0.000924262	upregulated	0.147471	0.786585		0.0136389	0.985899		0.118515	0.824965		-0.382871	0.427994		-0.984868	0.0389404
ASPWEDRAFT_54781	1.16007	0.00650913	upregulated	2.17667	5.36854e-09	upregulated	0.39789	0.36002		0.437551	0.356204		-0.235494	0.623431		1.05411	0.00663087	upregulated	-1.06199	0.0151245	downregulated
ASPWEDRAFT_77630	1.19289	8.28689e-05	upregulated	1.2651	1.16075e-05	upregulated	0.256352	0.432802		0.564322	0.0829871		-0.399987	0.225219		-0.0728306	0.846813		-0.212642	0.566998
ASPWEDRAFT_103068	1.6343	2.30022e-06	upregulated	-1.34116	8.24897e-05	downregulated	-1.4193	1.94625e-05	downregulated	-1.32032	0.000178416	downregulated	-2.48513	8.5106e-14	downregulated	-1.79074	6.4751e-08	downregulated	-2.18401	8.67124e-11	downregulated
ASPWEDRAFT_110474	1.17276	0.002239	upregulated	-1.61792	5.76176e-06	downregulated	-2.28389	4.8025e-11	downregulated	-2.66379	1.77704e-13	downregulated	-3.19472	1.89564e-19	downregulated	-2.99572	4.00503e-18	downregulated	-2.50087	2.50531e-12	downregulated
ASPWEDRAFT_113212	1.00288	0.04635	upregulated	-1.52025	0.000625431	downregulated	-1.7498	4.70903e-05	downregulated	-1.44722	0.0017616	downregulated	-2.52482	7.93442e-09	downregulated	-1.50643	0.000642712	downregulated	-2.14235	1.41548e-06	downregulated
ASPWEDRAFT_169785	1.53988	0.00118912	upregulated	-1.66204	0.000217891	downregulated	-3.32555	7.52803e-15	downregulated	-1.83173	7.22812e-05	downregulated	-2.07258	4.25392e-06	downregulated	-2.01913	4.2894e-06	downregulated	-1.34251	0.00431047	downregulated
ASPWEDRAFT_25797	1.80074	0.00382258	upregulated	-2.01375	0.000636233	downregulated	-1.86468	0.00126872	downregulated	-2.10764	0.000573533	downregulated	-2.83281	1.1926e-06	downregulated	-2.6857	2.28999e-06	downregulated	-2.07426	0.000527359	downregulated
ASPWEDRAFT_325629	1.79493	0.000457824	upregulated	-2.25513	2.55698e-06	downregulated	-1.17528	0.0167302	downregulated	-2.73575	1.85264e-08	downregulated	-3.62015	2.44346e-14	downregulated	-2.92729	4.42644e-10	downregulated	-3.04723	2.33575e-10	downregulated
ASPWEDRAFT_71309	3.05592	7.57323e-18	upregulated	-2.92028	3.52247e-08	downregulated	-2.45533	6.8391e-07	downregulated	-2.36743	1.28216e-05	downregulated	-4.04346	3.75896e-22	downregulated	-4.42198	9.59748e-27	downregulated	-4.56755	6.75533e-22	downregulated
ASPWEDRAFT_95853	2.5569	1.59006e-21	upregulated	-1.8344	3.38415e-11	downregulated	-2.47455	1.41207e-19	downregulated	-1.11757	0.000146772	downregulated	-3.95044	5.87554e-49	downregulated	-4.49289	1.06121e-63	downregulated	-4.24719	3.1457e-55	downregulated
ASPWEDRAFT_106085	1.62444	1.69902e-07	upregulated	-1.6264	1.17954e-07	downregulated	-1.20151	8.59726e-05	downregulated	-0.986996	0.00278842		-0.8938	0.00570852		-1.75578	4.90891e-09	downregulated	-1.22732	0.000114775	downregulated
ASPWEDRAFT_121850	1.15763	0.000116135	upregulated	-2.36264	7.11388e-16	downregulated	-1.57857	3.99269e-08	downregulated	-0.789584	0.0130414		-3.00767	4.27201e-24	downregulated	-3.41008	1.69216e-31	downregulated	-2.9848	3.28575e-23	downregulated
ASPWEDRAFT_121860	1.42661	3.64975e-05	upregulated	-1.69981	3.20615e-07	downregulated	-1.34585	4.60779e-05	downregulated	-0.886723	0.0148206		-1.38442	4.98916e-05	downregulated	-1.77961	5.2188e-08	downregulated	-0.749126	0.0398095
ASPWEDRAFT_160302	1.48336	0.0324028	upregulated	-1.31147	0.0459718	downregulated	-1.37555	0.0291936	downregulated	0.0550045	0.952653		-1.91544	0.00276385	downregulated	-3.14607	2.3449e-07	downregulated	-0.997479	0.150762
ASPWEDRAFT_171580	1.24657	0.00359384	upregulated	-1.18106	0.00374454	downregulated	-1.19259	0.00259411	downregulated	-0.312015	0.526261		-0.0407687	0.940656		-1.27688	0.00140656	downregulated	0.541022	0.236728
ASPWEDRAFT_44358	1.31499	0.00165544	upregulated	-1.81876	3.59506e-06	downregulated	-1.14271	0.00379117	downregulated	0.00509317	0.994879		-0.908622	0.0297087		-1.94043	4.6856e-07	downregulated	-0.401583	0.39622
ASPWEDRAFT_45551	1.17349	0.0303333	upregulated	-1.00807	0.0488941	downregulated	-1.30422	0.00692133	downregulated	0.742789	0.175195		0.616861	0.25711		-1.0341	0.0388193	downregulated	1.35775	0.00723835	upregulated
ASPWEDRAFT_140864	1.1498	0.00285174	upregulated	-1.24036	0.000598253	downregulated	-0.898451	0.0126397		-1.55427	2.13763e-05	downregulated	-1.41399	0.000105599	downregulated	-2.17322	3.0037e-10	downregulated	-1.13648	0.00238687	downregulated
ASPWEDRAFT_162198	5.40504	2.84735e-09	upregulated	-2.56372	0.0115927	downregulated	-1.07248	0.294018		-3.14868	0.00431142	downregulated	-3.11653	0.000897373	downregulated	-2.62668	0.00454405	downregulated	-2.47654	0.0104836	downregulated
ASPWEDRAFT_186729	4.86331	1.99149e-07	upregulated	-2.95683	0.00239313	downregulated	-1.52847	0.12034		-2.56807	0.0123326	downregulated	-2.42513	0.0133195	downregulated	-2.25654	0.0185078	downregulated	-2.21273	0.027252	downregulated
ASPWEDRAFT_41074	1.06303	0.00746429	upregulated	-1.04468	0.00531514	downregulated	-0.722936	0.0533407		-1.05092	0.00699416	downregulated	-0.825282	0.0334872		-0.951828	0.0107028		-0.704315	0.0802107
ASPWEDRAFT_45699	2.8185	2.87618e-06	upregulated	-2.91317	6.61006e-07	downregulated	-0.614912	0.344963		-7.33836	1.66958e-27	downregulated	-3.58623	9.33105e-10	downregulated	-0.804359	0.215219		-7.45034	5.69523e-37	downregulated
ASPWEDRAFT_45822	2.21493	0.000149033	upregulated	-1.98008	0.000593705	downregulated	-0.603433	0.328852		-1.79285	0.00307277	downregulated	-3.10107	3.90022e-08	downregulated	-1.09162	0.0641955		-2.76854	1.24456e-06	downregulated
ASPWEDRAFT_49568	3.53617	4.77576e-12	upregulated	-2.14901	4.87816e-05	downregulated	-0.730742	0.191401		-1.5732	0.00532118	downregulated	-3.18977	6.85593e-10	downregulated	-4.12943	1.32835e-16	downregulated	-3.31655	1.49477e-10	downregulated
ASPWEDRAFT_58248	2.18943	1.32203e-07	upregulated	-1.56829	0.00055553	downregulated	-0.604913	0.188275		-1.46292	0.00261287	downregulated	-2.5231	3.24061e-09	downregulated	-2.06713	4.27091e-07	downregulated	-2.63559	1.55227e-09	downregulated
ASPWEDRAFT_170423	1.00412	0.0181645	upregulated	-1.23542	0.00287	downregulated	0.00554817	0.991622		-0.977877	0.0286303		-1.34668	0.00108218	downregulated	-0.680254	0.0969994		-0.762027	0.0808939
ASPWEDRAFT_179210	1.22471	0.0324028	upregulated	-1.08915	0.0451952	downregulated	0.430841	0.447271		0.0794013	0.915196		-0.503671	0.395391		-1.04247	0.04949	downregulated	-0.453828	0.466436
ASPWEDRAFT_36689	1.1897	0.036195	upregulated	-1.3083	0.0121776	downregulated	-0.972178	0.0596176		-0.545141	0.362823		-1.70973	0.000942178	downregulated	-0.341369	0.564362		-1.12057	0.0394868	downregulated
ASPWEDRAFT_37169	1.20024	0.00163186	upregulated	-1.07134	0.00706326	downregulated	-0.603809	0.127888		0.384251	0.381416		-0.448498	0.274254		-1.37028	0.000207122	downregulated	0.0140001	0.983118
ASPWEDRAFT_37455	3.92902	2.328e-19	upregulated	-1.72203	0.000229308	downregulated	-0.68113	0.161945		-0.981531	0.0550407		-3.55653	1.06249e-15	downregulated	-4.22345	1.45859e-22	downregulated	-4.32124	1.3265e-22	downregulated
ASPWEDRAFT_40792	1.61338	8.43904e-05	upregulated	-1.16564	0.00457545	downregulated	-0.315742	0.483073		-0.549386	0.236525		0.524699	0.239301		-0.926065	0.0236688		1.63604	4.527e-05	upregulated
ASPWEDRAFT_42519	1.32746	2.23084e-06	upregulated	-1.19294	1.41451e-05	downregulated	-0.357495	0.228231		-0.697753	0.0199187		-1.6429	2.02825e-09	downregulated	-2.16497	2.10363e-16	downregulated	-1.24533	9.26756e-06	downregulated
ASPWEDRAFT_45738	1.03267	0.000246514	upregulated	-1.33818	1.7425e-06	downregulated	-0.972586	0.000459223		-0.268047	0.424408		-0.137492	0.680094		-0.827836	0.00261584		0.422036	0.16509
ASPWEDRAFT_54103	2.03336	0.00419275	upregulated	-1.70618	0.0127774	downregulated	0.125083	0.879724		0.23511	0.788543		-0.725698	0.339668		-1.10107	0.11718		-0.52008	0.527228
ASPWEDRAFT_656478	2.00516	0.0128082	upregulated	-1.89673	0.0125954	downregulated	-0.219062	0.809276		1.06523	0.204135		0.122301	0.900279		-1.78972	0.0172194	downregulated	1.05088	0.208982
ASPWEDRAFT_103940	1.78393	8.96476e-05	upregulated	0.252464	0.647404		1.51894	0.000434545	upregulated	1.0137	0.0352028	upregulated	-0.198689	0.715335		-0.709087	0.130931		-0.43004	0.418191
ASPWEDRAFT_106759	1.69204	0.00155501	upregulated	0.453301	0.438925		1.3495	0.00717429	upregulated	1.18313	0.029911	upregulated	0.110058	0.8672		-0.539037	0.340215		-0.147919	0.836808
ASPWEDRAFT_108523	1.24949	0.021449	upregulated	0.774046	0.143729		2.277	1.05337e-06	upregulated	1.26711	0.0152383	upregulated	-0.348767	0.551409		0.216647	0.71878		-0.545903	0.347891
ASPWEDRAFT_109536	1.18424	0.00897161	upregulated	0.575586	0.210484		1.29239	0.0014432	upregulated	1.14394	0.00961914	upregulated	0.194365	0.701689		-0.318286	0.508308		0.303495	0.558986
ASPWEDRAFT_110012	1.47405	0.000607042	upregulated	0.46107	0.319859		1.00936	0.0138379	upregulated	1.11055	0.0109505	upregulated	-0.0325572	0.954469		0.311709	0.514705		0.436919	0.370545
ASPWEDRAFT_164008	2.64814	1.99135e-08	upregulated	0.802551	0.132682		1.0307	0.0389584	upregulated	1.14479	0.0328383	upregulated	-0.194244	0.725374		-1.03457	0.026841	downregulated	-0.494401	0.359388
ASPWEDRAFT_166202	1.1893	0.0415209	upregulated	0.522267	0.374202		1.97289	6.31953e-05	upregulated	1.66218	0.00181197	upregulated	0.98855	0.0688081		-0.0476539	0.94718		1.02985	0.0622701
ASPWEDRAFT_168205	1.1512	0.0394437	upregulated	0.780322	0.14423		1.9263	5.58779e-05	upregulated	2.0165	6.00995e-05	upregulated	0.421398	0.468331		-0.347573	0.548462		0.724682	0.196117
ASPWEDRAFT_171266	2.0565	0.00163727	upregulated	1.2215	0.0631132		1.25912	0.0459063	upregulated	2.43746	0.000100963	upregulated	1.30492	0.0378183	upregulated	-0.347407	0.629879		1.30449	0.0416046	upregulated
ASPWEDRAFT_171773	1.18787	1.69744e-06	upregulated	0.41823	0.114885		1.16454	8.24573e-07	upregulated	1.08817	1.24504e-05	upregulated	0.410736	0.129177		0.377684	0.153559		0.589484	0.0252803
ASPWEDRAFT_173499	1.89033	1.84985e-05	upregulated	0.729544	0.121657		1.77035	2.22415e-05	upregulated	1.26102	0.00626648	upregulated	-0.0199846	0.972784		0.0598119	0.916367		-0.153614	0.797258
ASPWEDRAFT_185257	2.93164	6.90075e-10	upregulated	0.779302	0.161218		1.05139	0.0414005	upregulated	1.42439	0.00797693	upregulated	-0.234745	0.661674		-0.344096	0.497681		0.0496238	0.939985
ASPWEDRAFT_215316	2.0211	0.0389402	upregulated	1.6295	0.0759339		2.47643	0.00288338	upregulated	1.88882	0.0460203	upregulated	0.978712	0.247276		0.293455	0.758572		0.410376	0.691035
ASPWEDRAFT_23101	1.16302	0.00326212	upregulated	0.490365	0.229719		1.12001	0.00203507	upregulated	1.17508	0.00228034	upregulated	0.624114	0.120264		0.232838	0.593524		0.339879	0.447509
ASPWEDRAFT_30629	1.12493	0.0118968	upregulated	0.706879	0.106398		1.98489	1.87552e-07	upregulated	1.18332	0.00598071	upregulated	1.21786	0.00261646	upregulated	0.955015	0.0175535		1.20098	0.00354407	upregulated
ASPWEDRAFT_31984	2.5635	0.000225067	upregulated	0.947697	0.217981		1.68165	0.0134245	upregulated	1.84008	0.0115613	upregulated	-0.572993	0.427255		-0.993625	0.1365		-0.0134671	0.992106
ASPWEDRAFT_353125	1.03498	0.00664993	upregulated	0.192808	0.659648		1.05733	0.0022928	upregulated	1.44237	5.63756e-05	upregulated	0.967013	0.0082119		0.40355	0.300547		0.969041	0.00881958
ASPWEDRAFT_40160	2.52078	0.0151945	upregulated	1.43061	0.176216		2.47312	0.0077594	upregulated	2.43332	0.0160879	upregulated	0.509783	0.592292		-0.900299	0.343469		-0.65198	0.553868
ASPWEDRAFT_44675	1.53097	0.0496294	upregulated	0.219552	0.808135		2.7658	2.18356e-05	upregulated	1.66039	0.0236646	upregulated	0.205613	0.810128		0.0965548	0.915022		-0.439456	0.617055
ASPWEDRAFT_45629	1.84071	0.00111709	upregulated	0.396972	0.536454		1.64843	0.0017419	upregulated	1.24711	0.0310888	upregulated	0.985299	0.086726		0.440271	0.473652		0.761332	0.209524
ASPWEDRAFT_48493	1.14333	0.00781497	upregulated	0.641714	0.133459		1.04261	0.00806185	upregulated	1.31273	0.0014182	upregulated	-0.224347	0.64229		-0.151562	0.759245		-0.260602	0.605881
ASPWEDRAFT_53944	1.7388	0.00249255	upregulated	0.112366	0.877973		1.45804	0.00641571	upregulated	1.24809	0.0330835	upregulated	-0.189905	0.77578		-1.13177	0.0431448	downregulated	-0.151823	0.841316
ASPWEDRAFT_73154	1.28195	0.0487881	upregulated	-0.299875	0.673968		1.79233	0.00139757	upregulated	1.24398	0.045347	upregulated	0.714953	0.2688		0.127426	0.864079		0.723264	0.273323
ASPWEDRAFT_30889	2.15556	0.00120528	upregulated	0.840415	0.227168		1.45913	0.0212047	upregulated	-2.26325	0.000509253	downregulated	-1.12403	0.10121		0.813857	0.238689		-1.25187	0.0692248
ASPWEDRAFT_33548	1.21541	0.00118804	upregulated	0.619283	0.104603		1.10271	0.00155051	upregulated	-1.08966	0.00648093	downregulated	-0.193234	0.655995		0.983202	0.00531842		-2.19779	9.13953e-09	downregulated
ASPWEDRAFT_46420	1.1129	0.0026214	upregulated	-0.482557	0.206634		1.49884	6.8492e-06	upregulated	-1.81829	1.93779e-07	downregulated	-0.802177	0.0287689		0.454262	0.229919		-1.3097	0.000227746	downregulated
ASPWEDRAFT_55280	1.5528	0.00298095	upregulated	-0.111438	0.86523		1.86715	8.18735e-05	upregulated	-1.40349	0.00722225	downregulated	-0.747899	0.167539		0.250487	0.672257		-1.73556	0.000569327	downregulated
ASPWEDRAFT_103633	1.5779	8.5476e-07	upregulated	-0.0879035	0.841003		1.184	0.000140299	upregulated	-0.617617	0.113492		-0.612771	0.0742124		0.966606	0.00158632		-0.676336	0.0545261
ASPWEDRAFT_103765	1.2146	0.0203543	upregulated	0.842897	0.0942556		2.79072	1.25898e-10	upregulated	0.341074	0.5728		0.552568	0.291876		1.49658	0.000917989	upregulated	0.104552	0.876442
ASPWEDRAFT_104411	1.17494	0.00103793	upregulated	0.355858	0.357135		1.15427	0.000508998	upregulated	-0.503372	0.197361		-0.362429	0.355842		0.111858	0.794849		-0.967871	0.00688553
ASPWEDRAFT_104673	1.29895	0.000715547	upregulated	0.88352	0.0197877		3.36249	2.4013e-24	upregulated	-0.423122	0.360524		0.828258	0.0273226		2.32976	2.33962e-12	upregulated	-0.551676	0.192028
ASPWEDRAFT_106749	2.25798	6.60664e-21	upregulated	0.621565	0.0216585		1.37147	1.82817e-08	upregulated	-0.139938	0.69469		-0.722373	0.00488969		-0.179333	0.528015		-1.59447	5.01819e-10	downregulated
ASPWEDRAFT_108872	1.43171	0.0077407	upregulated	0.927317	0.0790474		2.05458	1.09163e-05	upregulated	0.639369	0.280638		1.04138	0.0369621	upregulated	1.06147	0.0278222	upregulated	0.382839	0.523665
ASPWEDRAFT_109135	1.00962	0.000333289	upregulated	0.36947	0.214648		1.02596	8.93061e-05	upregulated	0.50854	0.0893163		-1.00969	0.000241768	downregulated	-0.332049	0.263952		-1.45735	7.06643e-08	downregulated
ASPWEDRAFT_112093	1.01167	0.00235931	upregulated	0.407117	0.239209		1.08808	0.000332975	upregulated	-0.0109081	0.983667		-0.257701	0.4864		1.18538	8.94532e-05	upregulated	-0.936417	0.00545954
ASPWEDRAFT_115016	1.27092	0.000113737	upregulated	0.444259	0.206592		1.64013	6.37126e-08	upregulated	-0.113533	0.790576		-0.644649	0.05996		0.219149	0.557597		-0.656981	0.0599962
ASPWEDRAFT_121336	1.04935	0.00305114	upregulated	0.928916	0.0058494		1.09947	0.000670644	upregulated	0.597269	0.106121		0.536109	0.138798		0.370172	0.311333		0.444173	0.241279
ASPWEDRAFT_140372	5.38686	0.00294831	upregulated	3.02087	0.12634		5.01508	0.00273121	upregulated	3.77883	0.0543955		0.542109	0.697464		-0.303068	0.836829		-0.925155	0.566059
ASPWEDRAFT_142299	2.20143	1.44052e-05	upregulated	0.838283	0.142365		2.04984	1.7649e-05	upregulated	-0.134112	0.880025		-0.176811	0.747472		0.0581317	0.919099		-0.116477	0.855385
ASPWEDRAFT_163873	3.47847	0.0129292	upregulated	2.1751	0.124237		5.42497	4.99629e-06	upregulated	0.0172819	0.995538		0.554124	0.622535		2.83558	0.00121937	upregulated	-0.836811	0.517814
ASPWEDRAFT_166120	1.16768	0.0295746	upregulated	0.606937	0.254024		1.39582	0.00291876	upregulated	0.62152	0.266517		0.705624	0.177494		0.364233	0.507411		0.446013	0.438596
ASPWEDRAFT_166356	1.09101	0.0310668	upregulated	-0.00600423	0.99259		1.22108	0.00629687	upregulated	0.677594	0.186008		0.238142	0.665275		-0.206086	0.711037		-0.236775	0.690254
ASPWEDRAFT_167054	2.23003	5.06252e-08	upregulated	0.909797	0.0410895		1.36606	0.000875073	upregulated	0.98127	0.0354124		0.0954878	0.848008		-0.380909	0.383715		0.0228409	0.970966
ASPWEDRAFT_167852	1.11144	0.0270161	upregulated	0.601298	0.226079		1.65466	7.69909e-05	upregulated	0.187675	0.769198		-0.09834	0.865575		1.02557	0.0152034	upregulated	-0.325284	0.583864
ASPWEDRAFT_171825	1.36017	3.44482e-05	upregulated	0.113593	0.789197		1.58989	1.52337e-07	upregulated	-0.702419	0.0720814		0.298152	0.413984		1.32588	9.41721e-06	upregulated	-0.625072	0.083103
ASPWEDRAFT_171871	1.08574	0.013352	upregulated	0.251355	0.608087		1.17674	0.00275668	upregulated	-0.409699	0.401085		-0.210586	0.66628		0.0561222	0.916367		-1.12913	0.00873728	downregulated
ASPWEDRAFT_172142	1.75681	0.00141475	upregulated	0.109609	0.877029		2.18738	1.12912e-05	upregulated	0.949791	0.104117		0.0398687	0.954994		0.00160888	0.998593		0.384715	0.549456
ASPWEDRAFT_173282	1.40773	0.00150794	upregulated	0.490698	0.29704		1.34541	0.00107491	upregulated	0.0950958	0.873343		-0.237878	0.641899		0.327172	0.501419		-0.862458	0.0592247
ASPWEDRAFT_173434	1.34639	0.0473763	upregulated	1.01974	0.107822		2.47267	3.90405e-06	upregulated	1.07328	0.112656		-0.344351	0.632343		0.390804	0.537825		-0.809428	0.287677
ASPWEDRAFT_176729	1.96415	0.0133196	upregulated	1.00917	0.213968		4.35728	2.14119e-11	upregulated	-0.659631	0.549638		0.813723	0.270886		3.0411	5.90056e-07	upregulated	-0.999612	0.24057
ASPWEDRAFT_177416	1.48694	0.0200734	upregulated	-0.386632	0.611516		1.35013	0.0187091	upregulated	0.889238	0.185704		0.451892	0.48607		0.749994	0.199767		0.560714	0.397802
ASPWEDRAFT_177935	2.50566	7.50926e-05	upregulated	0.463872	0.545267		2.06884	0.000594944	upregulated	0.646214	0.403985		0.0484804	0.951999		-0.226864	0.754349		-0.706745	0.314003
ASPWEDRAFT_180998	2.40738	1.88679e-05	upregulated	0.941205	0.114152		2.15775	5.46545e-05	upregulated	0.818328	0.196452		0.509488	0.426023		0.46554	0.461436		0.666068	0.297706
ASPWEDRAFT_182495	1.17711	0.000408231	upregulated	0.894349	0.00580088		1.58834	1.25501e-07	upregulated	0.931101	0.00596708		0.438107	0.210853		1.51492	3.66864e-07	upregulated	-0.297323	0.448788
ASPWEDRAFT_183394	1.0542	0.0124541	upregulated	0.317685	0.482893		2.14472	3.45222e-09	upregulated	0.182704	0.71802		0.350757	0.433932		1.01489	0.00893472	upregulated	-0.0223126	0.971503
ASPWEDRAFT_185079	1.99465	0.00138938	upregulated	-0.26905	0.734408		1.20191	0.0471456	upregulated	1.13537	0.0879855		0.545919	0.405965		-0.39224	0.559848		0.198837	0.803256
ASPWEDRAFT_185721	1.67337	0.0102827	upregulated	1.18177	0.0621593		1.56623	0.00791647	upregulated	1.14929	0.0884138		1.46106	0.0104845	upregulated	-0.0152634	0.985615		1.89545	0.000721641	upregulated
ASPWEDRAFT_188135	1.27596	0.04521	upregulated	0.625108	0.323721		1.72192	0.0017888	upregulated	0.837421	0.189429		-0.535292	0.412929		-0.179398	0.79997		0.473942	0.49279
ASPWEDRAFT_22290	1.53226	0.0338075	upregulated	-0.620055	0.465326		3.46479	1.58855e-09	upregulated	-1.02967	0.281308		-2.5394	0.00301889	downregulated	1.1224	0.0632331		-2.65336	0.00549365	downregulated
ASPWEDRAFT_23129	1.54911	8.17711e-05	upregulated	0.920514	0.0209467		2.61476	4.9537e-14	upregulated	-0.278811	0.601076		-0.679169	0.102615		0.330122	0.424208		-1.21432	0.0045712	downregulated
ASPWEDRAFT_24065	1.40034	0.0192555	upregulated	-0.341079	0.614876		1.18306	0.0297701	upregulated	1.02615	0.0875017		0.284029	0.662958		-0.961778	0.0933894		-0.652711	0.307964
ASPWEDRAFT_24712	1.33263	5.18309e-07	upregulated	0.467242	0.106305		1.75405	5.93775e-13	upregulated	0.708575	0.0149417		0.285858	0.330273		1.19462	6.45345e-07	upregulated	-0.56	0.0605465
ASPWEDRAFT_26426	1.0719	0.0258239	upregulated	0.818949	0.0728493		2.36372	3.65792e-09	upregulated	0.704265	0.149053		0.374098	0.453604		0.827629	0.0596682		0.630063	0.1923
ASPWEDRAFT_270838	2.69484	4.68013e-15	upregulated	0.832593	0.0260547		1.94218	1.12087e-08	upregulated	-0.850293	0.0297519		0.422872	0.297711		0.956145	0.00817579		-0.493632	0.226867
ASPWEDRAFT_27440	1.01808	0.00401676	upregulated	-0.272534	0.501988		1.19693	0.000145086	upregulated	0.24958	0.556329		-0.163546	0.687602		0.355175	0.318463		-0.496987	0.205649
ASPWEDRAFT_29002	1.23469	0.030968	upregulated	0.463191	0.433963		1.85617	0.000155845	upregulated	0.813354	0.160042		-0.519034	0.382122		0.0369194	0.9594		-0.856305	0.14289
ASPWEDRAFT_290066	1.22629	0.000515948	upregulated	0.6748	0.0592185		1.57234	1.05132e-06	upregulated	0.349333	0.390153		-0.187773	0.647797		0.130557	0.754932		-0.120773	0.797869
ASPWEDRAFT_312960	1.70742	1.83278e-11	upregulated	0.571354	0.0395939		2.21043	4.86181e-20	upregulated	-0.85823	0.0039909		-0.518519	0.0623589		1.3342	4.49872e-08	upregulated	-1.4976	2.35234e-08	downregulated
ASPWEDRAFT_32683	1.42446	5.39127e-10	upregulated	0.587421	0.0152683		1.82362	6.3068e-17	upregulated	-0.399583	0.129947		-0.432688	0.0874748		1.35296	1.3837e-09	upregulated	-1.59916	3.13202e-12	downregulated
ASPWEDRAFT_34439	1.02068	0.0498503	upregulated	0.734775	0.136191		1.12135	0.0138429	upregulated	0.68563	0.186727		-0.921992	0.0603605		-0.857978	0.0735174		-0.580686	0.273294
ASPWEDRAFT_35036	1.39711	0.0285406	upregulated	0.84059	0.17652		1.67653	0.00267925	upregulated	-0.318227	0.675294		0.142089	0.845834		0.325322	0.629016		-0.925973	0.154851
ASPWEDRAFT_35160	1.40518	8.97508e-09	upregulated	0.942864	0.000122807		1.13084	1.91427e-06	upregulated	0.835176	0.00116042		-0.473125	0.0764154		-0.0695946	0.825631		-0.243518	0.41322
ASPWEDRAFT_35765	1.79104	1.68021e-09	upregulated	-0.144782	0.708688		2.29965	3.08893e-16	upregulated	-0.123296	0.763463		-0.889357	0.00443944		0.774093	0.0107584		-1.25415	5.13265e-05	downregulated
ASPWEDRAFT_362867	1.04747	0.00131512	upregulated	0.544337	0.0998996		1.67998	8.75589e-09	upregulated	0.394865	0.271516		0.125645	0.74326		0.729901	0.020402		-0.477834	0.172088
ASPWEDRAFT_36463	1.08694	0.000880445	upregulated	0.344469	0.326859		1.00043	0.0010308	upregulated	-0.548671	0.11384		-0.814645	0.0122189		1.34958	8.28761e-06	upregulated	-0.91651	0.00485922
ASPWEDRAFT_37131	1.44064	0.0118933	upregulated	0.488473	0.419434		1.18544	0.0242485	upregulated	0.436174	0.497623		-0.138856	0.835538		-0.0400078	0.957517		-0.287173	0.674341
ASPWEDRAFT_37188	1.65606	9.35633e-07	upregulated	0.247153	0.539647		2.05306	9.46368e-11	upregulated	-0.345321	0.392078		-1.42669	2.54105e-05	downregulated	2.18964	6.14128e-12	upregulated	-1.96559	3.85794e-09	downregulated
ASPWEDRAFT_37847	2.48043	0.0434624	upregulated	0.0701288	0.960924		2.63813	0.0146695	upregulated	1.98312	0.0983894		1.81355	0.124997		1.14299	0.343962		2.29169	0.0497398	upregulated
ASPWEDRAFT_39047	1.4263	0.00477577	upregulated	0.558726	0.289585		1.48548	0.0012373	upregulated	0.72101	0.178911		0.697452	0.175107		0.690369	0.166015		0.816113	0.113274
ASPWEDRAFT_397677	1.70448	0.000934562	upregulated	0.578837	0.308722		1.47843	0.00207221	upregulated	0.699236	0.240092		0.224463	0.691007		-0.438442	0.409868		0.277212	0.643054
ASPWEDRAFT_40351	1.30476	0.00450617	upregulated	-0.0840651	0.882781		1.27272	0.0024997	upregulated	0.907676	0.05157		0.152415	0.775326		-0.0824357	0.882554		0.500291	0.31716
ASPWEDRAFT_40558	1.84027	0.00796319	upregulated	1.21487	0.0760978		2.63305	8.7549e-06	upregulated	0.668021	0.417428		-0.013151	0.98744		0.830863	0.169177		-1.70474	0.0322792	downregulated
ASPWEDRAFT_41064	1.48363	0.000974135	upregulated	0.507397	0.29384		1.116	0.00871485	upregulated	0.853992	0.0730069		-0.232818	0.652407		-0.945016	0.032723		-0.988381	0.0366303
ASPWEDRAFT_41262	3.39337	7.21923e-15	upregulated	0.611211	0.278342		1.68259	0.000283436	upregulated	-0.445051	0.552725		0.225016	0.61594		0.392428	0.335292		0.193966	0.694354
ASPWEDRAFT_42536	1.69914	0.00144527	upregulated	0.334894	0.593981		3.17859	8.18109e-12	upregulated	-0.292667	0.676945		-0.737508	0.187488		0.700847	0.178201		-1.63389	0.00370084	downregulated
ASPWEDRAFT_42540	1.25335	0.0051216	upregulated	0.627426	0.16888		1.11441	0.00636498	upregulated	0.140986	0.815583		-1.04895	0.0252923	downregulated	-0.131309	0.796255		-0.986564	0.0473924
ASPWEDRAFT_43384	2.67237	1.73927e-12	upregulated	0.748977	0.0780848		1.2418	0.0014432	upregulated	0.664041	0.144047		-0.00312735	0.99525		-0.2075	0.649372		-0.272685	0.570872
ASPWEDRAFT_44574	3.01118	3.33139e-21	upregulated	0.769024	0.0368244		1.34264	6.12973e-05	upregulated	-0.357752	0.447831		0.0977274	0.802699		0.810713	0.00892944		-0.45179	0.209186
ASPWEDRAFT_45961	1.2179	6.45564e-06	upregulated	0.915355	0.000580568		1.80365	3.27742e-13	upregulated	0.894704	0.00130407		0.264392	0.3879		0.529005	0.0521584		0.0392514	0.920184
ASPWEDRAFT_49063	1.51183	7.69538e-06	upregulated	-0.262422	0.505932		1.06558	0.00112536	upregulated	0.968805	0.00588881		0.00949679	0.983361		-0.0412675	0.928034		0.138957	0.759986
ASPWEDRAFT_491033	1.29033	0.0385675	upregulated	-0.00994177	0.990236		2.12846	5.45813e-05	upregulated	0.564394	0.396815		0.438558	0.495189		0.650751	0.274293		-0.102449	0.89851
ASPWEDRAFT_49600	1.40675	0.0155001	upregulated	1.01905	0.0684904		1.96616	8.7754e-05	upregulated	-0.262692	0.728959		0.276021	0.658613		1.02221	0.0480981	upregulated	-0.613892	0.337042
ASPWEDRAFT_49718	1.52057	0.00323039	upregulated	0.435342	0.449023		2.12358	2.59548e-06	upregulated	0.954655	0.07948		0.532966	0.307196		-0.0154165	0.982441		0.354202	0.544303
ASPWEDRAFT_51779	1.83026	0.000237426	upregulated	0.941713	0.0659343		2.09526	4.77163e-06	upregulated	0.988721	0.0638879		1.14334	0.0191515	upregulated	-0.0454773	0.945087		0.756169	0.148911
ASPWEDRAFT_52103	1.98509	0.00302251	upregulated	-0.825426	0.340215		1.81183	0.00319366	upregulated	0.255632	0.784988		-0.115898	0.877784		-0.966395	0.134		0.954484	0.123109
ASPWEDRAFT_534740	1.3017	3.43133e-05	upregulated	-0.0676842	0.8717		1.21836	3.86581e-05	upregulated	0.381885	0.294382		-0.566446	0.0898593		-0.546528	0.0908775		-0.619399	0.0688343
ASPWEDRAFT_54722	3.02195	0.0189691	upregulated	2.03273	0.110865		3.0763	0.00709956	upregulated	1.21823	0.432576		-1.76564	0.145175		-0.747632	0.497732		-0.429243	0.743787
ASPWEDRAFT_55453	1.89017	0.00351482	upregulated	0.438486	0.565431		1.38779	0.0232615	upregulated	0.521472	0.511947		-0.413242	0.552436		-1.20704	0.0540422		-0.546595	0.453347
ASPWEDRAFT_588286	4.35397	0.0172435	upregulated	1.66842	0.435181		5.03491	0.00165977	upregulated	-0.332678	0.911692		-1.05497	0.456437		0.945216	0.428043		-3.10723	0.0881261
ASPWEDRAFT_593396	1.27047	0.0117831	upregulated	0.215935	0.720196		1.5057	0.000650554	upregulated	-0.038808	0.958241		-1.43683	0.00653158	downregulated	-0.572151	0.256626		-0.970602	0.0775495
ASPWEDRAFT_598538	1.72789	0.0287428	upregulated	0.432401	0.633445		3.29212	2.79246e-07	upregulated	0.562846	0.54817		-0.384385	0.642537		0.670702	0.343918		-0.565147	0.521916
ASPWEDRAFT_598648	2.33587	7.2577e-10	upregulated	0.249201	0.625661		1.58194	2.944e-05	upregulated	-0.0250426	0.970822		-0.856944	0.0284383		-0.745178	0.0473724		-0.566781	0.176119
ASPWEDRAFT_668864	1.23657	0.0258239	upregulated	0.379831	0.521002		1.89783	7.66368e-05	upregulated	0.816331	0.144551		0.740687	0.176584		0.0452406	0.948386		0.372968	0.548392
ASPWEDRAFT_70119	1.47591	2.25133e-09	upregulated	-0.111445	0.727264		1.16122	1.40204e-06	upregulated	-0.996548	0.000117354		-1.82366	7.94416e-14	downregulated	-1.23742	3.66864e-07	downregulated	-2.25623	8.9281e-21	downregulated
ASPWEDRAFT_70219	1.12526	0.0223317	upregulated	0.10458	0.860263		1.38939	0.00140697	upregulated	0.419048	0.431264		0.124111	0.826326		0.203845	0.709012		-0.520481	0.316925
ASPWEDRAFT_702358	1.42707	6.17065e-06	upregulated	0.56561	0.0948572		2.08994	2.19887e-13	upregulated	0.510979	0.164465		-0.573586	0.0903358		0.707395	0.0183618		-0.949428	0.00607194
ASPWEDRAFT_707438	1.67044	6.91779e-05	upregulated	0.522405	0.249143		1.8716	1.69178e-06	upregulated	0.755449	0.0953615		-0.0813835	0.877839		-0.249684	0.607615		-0.150462	0.790834
ASPWEDRAFT_732379	1.73693	4.13571e-09	upregulated	0.94866	0.00173067		1.61662	1.34416e-08	upregulated	0.171183	0.65759		-0.302465	0.383641		0.0233686	0.956619		-0.199354	0.600943
ASPWEDRAFT_747212	3.00461	0.000457824	upregulated	1.50167	0.0947567		5.51762	2.65499e-13	upregulated	1.29184	0.187378		0.450089	0.614765		0.71699	0.385137		0.653515	0.46781
ASPWEDRAFT_748324	1.17111	0.00611347	upregulated	0.606097	0.158775		1.29348	0.000735589	upregulated	0.262724	0.607917		-0.289473	0.53974		0.160094	0.740199		-0.478254	0.312425
ASPWEDRAFT_748654	1.17472	0.00618348	upregulated	0.994353	0.0151801		1.23072	0.0015764	upregulated	0.80073	0.0666599		0.634884	0.14443		-0.0640224	0.902415		0.0507623	0.930783
ASPWEDRAFT_96868	1.7025	1.51254e-05	upregulated	0.828963	0.0459222		1.80484	7.5129e-07	upregulated	0.705876	0.122296		-0.520909	0.218437		0.482983	0.207658		-0.109197	0.838148
ASPWEDRAFT_96876	1.27714	6.51767e-05	upregulated	-0.336877	0.340992		1.04363	0.000599146	upregulated	0.0865683	0.839459		-1.3734	1.1538e-05	downregulated	0.732311	0.0212269		-1.09388	0.000652963	downregulated
ASPWEDRAFT_111966	1.98403	6.70557e-08	upregulated	-0.755545	0.0552358		-1.45252	6.60774e-05	downregulated	-2.03606	7.5686e-08	downregulated	-2.2804	3.70093e-10	downregulated	-2.0829	4.90891e-09	downregulated	-2.51873	4.59735e-12	downregulated
ASPWEDRAFT_175967	2.65355	1.26622e-06	upregulated	-0.882284	0.161116		-1.25749	0.0368811	downregulated	-1.68736	0.0117675	downregulated	-1.11622	0.0520732		-0.443055	0.4708		-0.184581	0.804518
ASPWEDRAFT_184208	1.0952	0.000250853	upregulated	-0.82179	0.00610626		-1.49448	1.90496e-07	downregulated	-2.34021	3.24457e-14	downregulated	-2.27429	6.7257e-15	downregulated	-1.9033	1.38439e-11	downregulated	-1.90283	1.20028e-10	downregulated
ASPWEDRAFT_42794	1.71162	0.00088209	upregulated	-0.657455	0.22376		-1.05249	0.0335785	downregulated	-1.37945	0.00794891	downregulated	-0.178913	0.769619		-0.0852472	0.895054		0.144074	0.835912
ASPWEDRAFT_104653	1.95641	0.00156127	upregulated	-0.709025	0.280926		-1.72616	0.00324595	downregulated	-1.09776	0.0939323		-1.48575	0.0155316	downregulated	-0.462468	0.494974		-1.11761	0.0817498
ASPWEDRAFT_127748	1.09803	0.000674468	upregulated	-0.974904	0.00176725		-1.54104	1.93102e-07	downregulated	-0.341147	0.350109		-1.9168	2.30218e-10	downregulated	-1.95694	3.11413e-11	downregulated	-1.64932	7.42482e-08	downregulated
ASPWEDRAFT_134843	1.62254	7.07381e-05	upregulated	-0.247334	0.624991		-1.10038	0.0117522	downregulated	0.876744	0.0459862		-0.584824	0.182789		-1.50746	0.00016878	downregulated	0.439821	0.336258
ASPWEDRAFT_172497	1.31846	1.07002e-11	upregulated	0.182974	0.428934		-1.37481	6.82698e-13	downregulated	0.616048	0.00334105		-0.51441	0.0139783		-1.68068	6.30051e-19	downregulated	-0.638156	0.00212042
ASPWEDRAFT_173932	1.73937	0.00102659	upregulated	-0.823015	0.132899		-1.2241	0.0164226	downregulated	0.27591	0.671245		-0.556766	0.334871		-2.0655	3.14694e-05	downregulated	0.168614	0.810848
ASPWEDRAFT_176429	1.17193	0.000967693	upregulated	-0.567487	0.119914		-1.20727	0.000279866	downregulated	-0.383743	0.337646		-1.34933	8.00588e-05	downregulated	-0.828466	0.0163722		-1.13449	0.00118834	downregulated
ASPWEDRAFT_36538	1.16884	6.3013e-06	upregulated	-0.911744	0.00107165		-1.28317	4.42537e-06	downregulated	-0.0244493	0.951506		-0.737231	0.00663622		-1.3592	1.47337e-07	downregulated	0.419592	0.135827
ASPWEDRAFT_36690	1.30463	0.0172694	upregulated	-0.941146	0.0765381		-1.41761	0.00420341	downregulated	-0.451796	0.453254		-1.97797	8.73436e-05	downregulated	-0.600339	0.272016		-1.83584	0.000329452	downregulated
ASPWEDRAFT_40827	1.05033	0.00226733	upregulated	-0.531234	0.12875		-1.21145	0.000125294	downregulated	-0.8948	0.00944859		-1.06766	0.00128501	downregulated	-1.08313	0.00078863	downregulated	-1.14662	0.000566167	downregulated
ASPWEDRAFT_45467	1.35074	0.000324208	upregulated	-0.460436	0.251524		-1.43122	4.81321e-05	downregulated	-0.532434	0.197963		-0.500063	0.215273		-0.41242	0.302598		0.0755656	0.88378
ASPWEDRAFT_47645	1.33152	0.0104303	upregulated	-0.0859531	0.892561		-1.44002	0.00273377	downregulated	0.652539	0.235029		-1.05333	0.0380497	downregulated	-1.34847	0.00531933	downregulated	-0.722545	0.181265
ASPWEDRAFT_731886	1.23889	0.0453824	upregulated	-0.785527	0.188679		-2.08933	8.11191e-05	downregulated	-0.632524	0.323437		-2.32566	2.22845e-05	downregulated	-1.1038	0.0514624		-2.13234	0.000123839	downregulated
ASPWEDRAFT_105411	1.17696	0.000126782	upregulated	0.0663132	0.868678		0.136547	0.700732		1.01044	0.00107176	upregulated	-0.570067	0.0765848		-0.762029	0.0121511		-0.396901	0.248405
ASPWEDRAFT_106426	1.2548	0.00703722	upregulated	0.672153	0.150787		0.858103	0.0503398		1.64716	0.000139716	upregulated	0.847801	0.0508307		-0.599023	0.197371		0.479857	0.328829
ASPWEDRAFT_110131	1.43864	0.00319503	upregulated	0.70681	0.153049		0.0127304	0.983995		1.53389	0.00120025	upregulated	-0.102764	0.862502		-1.2994	0.00481435	downregulated	0.028409	0.968773
ASPWEDRAFT_112263	1.88566	5.8233e-06	upregulated	0.42056	0.368978		0.605489	0.159337		1.56515	0.000195511	upregulated	-0.129296	0.803414		-0.648582	0.14015		0.19681	0.719711
ASPWEDRAFT_113375	1.64158	2.01699e-09	upregulated	0.366014	0.238654		0.720544	0.00982518		1.03982	0.000296446	upregulated	-0.0625068	0.862208		-0.209262	0.514727		-0.00544617	0.993111
ASPWEDRAFT_116914	1.05919	0.00161198	upregulated	0.371724	0.29624		0.951137	0.00233214		1.08465	0.000967411	upregulated	0.69291	0.0393469		0.103041	0.797244		1.03957	0.00148787	upregulated
ASPWEDRAFT_116974	2.27081	0.00470606	upregulated	0.312046	0.745759		1.22452	0.114609		2.27329	0.00369804	upregulated	0.167552	0.861868		-0.620956	0.466813		0.676243	0.450179
ASPWEDRAFT_121910	1.37106	0.00179399	upregulated	0.185336	0.727954		-0.0501377	0.927155		1.26324	0.00371619	upregulated	1.26715	0.00219513	upregulated	-0.0527531	0.924809		1.46299	0.000389556	upregulated
ASPWEDRAFT_122164	1.92322	0.00211815	upregulated	0.231639	0.759367		0.392124	0.560247		1.43722	0.0231498	upregulated	0.704923	0.29056		-0.621082	0.344902		1.08725	0.0922732
ASPWEDRAFT_155085	1.06046	0.0404177	upregulated	0.603336	0.230632		0.318482	0.552679		1.59209	0.000476626	upregulated	0.327103	0.53283		-1.5614	0.00292792	downregulated	0.702484	0.153442
ASPWEDRAFT_166906	1.67762	0.000564035	upregulated	0.413491	0.451205		0.51756	0.311691		1.09682	0.0303632	upregulated	0.524151	0.309952		-0.945099	0.0495929		0.632091	0.222337
ASPWEDRAFT_172631	1.29891	0.0313028	upregulated	1.10635	0.0507735		0.801412	0.154195		2.19245	5.7514e-05	upregulated	1.3758	0.0137179	upregulated	0.341238	0.590516		1.89705	0.000508724	upregulated
ASPWEDRAFT_173529	1.53006	8.17711e-05	upregulated	-0.651683	0.108661		-0.626465	0.109696		1.00736	0.0121254	upregulated	-0.42484	0.325613		-1.00776	0.00849667	downregulated	0.261225	0.584215
ASPWEDRAFT_174965	1.25939	0.00177769	upregulated	0.441137	0.306409		0.79649	0.0392214		1.11185	0.00571108	upregulated	0.874321	0.0244815		0.0667134	0.891954		1.29018	0.000632737	upregulated
ASPWEDRAFT_25723	1.56929	0.0012427	upregulated	0.279312	0.622861		0.355282	0.495904		1.91654	4.01179e-05	upregulated	1.5651	0.000737198	upregulated	-0.0885501	0.882316		1.75321	0.000153085	upregulated
ASPWEDRAFT_278490	1.20476	0.00014133	upregulated	0.407284	0.228819		0.704802	0.0220848		1.07577	0.000681701	upregulated	-0.215391	0.556944		-0.147455	0.693422		0.0896298	0.83682
ASPWEDRAFT_29117	1.60754	0.000143782	upregulated	-0.0476159	0.934078		0.742398	0.0835262		1.20881	0.00571453	upregulated	-0.29075	0.543394		-0.900123	0.0324448		0.559731	0.211289
ASPWEDRAFT_34401	1.51262	0.0172258	upregulated	0.765239	0.231159		0.991637	0.0962886		2.42526	2.32206e-05	upregulated	1.25815	0.0300397	upregulated	-0.456712	0.486461		1.72809	0.00234984	upregulated
ASPWEDRAFT_38763	1.14135	0.0023333	upregulated	0.658422	0.0791548		0.0706649	0.873647		1.47305	3.75242e-05	upregulated	0.463582	0.240875		-0.605831	0.10446		0.445386	0.274043
ASPWEDRAFT_39537	2.74654	0.0100584	upregulated	-0.0973944	0.940503		-0.183635	0.881283		3.00128	0.00341209	upregulated	0.550026	0.64378		-1.52795	0.144317		1.89194	0.0762497
ASPWEDRAFT_40578	1.84679	1.51792e-09	upregulated	0.462153	0.176927		0.804244	0.00988103		1.24946	8.89334e-05	upregulated	0.117794	0.759681		-0.108231	0.780084		0.167507	0.677716
ASPWEDRAFT_48111	3.04894	6.74039e-18	upregulated	-0.458252	0.279038		0.169541	0.703919		1.1975	0.00209563	upregulated	-1.02524	0.00717214	downregulated	-2.13643	1.57374e-09	downregulated	-0.136301	0.78871
ASPWEDRAFT_50403	1.08785	9.11903e-06	upregulated	0.827979	0.000615468		0.21047	0.431538		1.20932	5.23681e-07	upregulated	0.221174	0.432863		-0.77269	0.00137733		0.761815	0.00233944
ASPWEDRAFT_51804	5.06447	0.000189793	upregulated	1.50261	0.370483		0.848704	0.648466		3.28473	0.0251609	upregulated	0.855754	0.266903		-0.547114	0.511526		1.66053	0.0204106	upregulated
ASPWEDRAFT_550058	1.09911	0.000274024	upregulated	0.441896	0.162042		-0.747493	0.00989508		1.15227	0.000101878	upregulated	-0.473955	0.138253		-1.14817	5.99696e-05	downregulated	-0.101544	0.802166
ASPWEDRAFT_55596	1.60848	0.000666649	upregulated	0.863251	0.0721957		0.0127607	0.983799		1.5146	0.00122022	upregulated	-0.450528	0.389386		-0.666735	0.169249		-0.210375	0.726969
ASPWEDRAFT_70556	1.09775	0.000865826	upregulated	0.536044	0.112557		0.0937356	0.813907		1.19095	0.00019194	upregulated	-0.575668	0.0970348		-1.23566	0.000134816	downregulated	0.618875	0.0648461
ASPWEDRAFT_72512	1.80472	1.16126e-05	upregulated	0.308846	0.524969		0.163836	0.738444		1.07777	0.012949	upregulated	-0.578677	0.199087		-1.47851	0.000241117	downregulated	-0.150164	0.788803
ASPWEDRAFT_111145	1.8891	3.65717e-05	upregulated	-0.504462	0.317571		-0.508352	0.290775		-1.33186	0.00475061	downregulated	-2.85496	5.78746e-11	downregulated	-2.70565	2.50452e-10	downregulated	-2.96207	1.13892e-11	downregulated
ASPWEDRAFT_130791	1.31718	0.000167512	upregulated	0.147957	0.73006		0.187363	0.632582		-1.33797	0.000106557	downregulated	-1.41011	3.38645e-05	downregulated	-0.759351	0.0294219		-1.75386	1.73194e-07	downregulated
ASPWEDRAFT_136678	1.78994	0.000738585	upregulated	-1.10401	0.0731753		0.218041	0.730689		-1.40742	0.0414429	downregulated	-1.83975	0.000885244	downregulated	-0.669013	0.212097		-3.08748	4.70922e-06	downregulated
ASPWEDRAFT_168776	1.11306	0.00735236	upregulated	-0.45925	0.285089		-0.838268	0.0310607		-1.52815	0.000118055	downregulated	-2.20178	7.54917e-09	downregulated	-1.12829	0.00348725	downregulated	-2.42486	2.20734e-10	downregulated
ASPWEDRAFT_181976	1.09538	3.84693e-06	upregulated	-0.849166	0.000570123		-0.344602	0.176163		-1.114	1.95202e-05	downregulated	-0.817776	0.000838213		-0.763622	0.00126373		-0.40575	0.127898
ASPWEDRAFT_184205	1.86012	0.00508255	upregulated	-0.794674	0.257187		-0.400449	0.577788		-1.4615	0.039352	downregulated	0.857167	0.207191		-1.03361	0.113553		2.57056	2.71989e-05	upregulated
ASPWEDRAFT_26117	1.09051	0.0482291	upregulated	-0.0685047	0.915364		0.818913	0.102024		-1.29664	0.0149709	downregulated	-1.63514	0.00119027	downregulated	-0.0146938	0.984203		-2.28838	6.58636e-06	downregulated
ASPWEDRAFT_35953	1.20808	0.00450617	upregulated	-0.909261	0.0276769		-0.89668	0.0242127		-2.55674	3.73077e-11	downregulated	-0.763689	0.0728183		-0.212851	0.656404		-1.04807	0.0121102	downregulated
ASPWEDRAFT_51472	1.05109	0.00181538	upregulated	0.468654	0.176694		0.818226	0.00972013		-2.98299	8.30597e-22	downregulated	-1.66311	1.34793e-07	downregulated	-0.0932729	0.818222		-3.38238	2.92501e-28	downregulated
ASPWEDRAFT_53788	1.11277	7.74821e-08	upregulated	-0.441953	0.0489446		-0.00519953	0.985633		-1.03479	3.30104e-06	downregulated	-1.24714	3.02848e-09	downregulated	-0.562017	0.00792143		-1.64009	1.56984e-14	downregulated
ASPWEDRAFT_55478	1.06483	8.96142e-08	upregulated	-0.378325	0.0791045		0.140509	0.538597		-1.07663	1.7957e-07	downregulated	-1.01504	4.43756e-07	downregulated	0.00861797	0.977082		-1.89473	1.41188e-21	downregulated
ASPWEDRAFT_95752	1.18367	0.0381792	upregulated	0.274263	0.662504		-0.167397	0.786203		-1.22656	0.0271258	downregulated	-2.07876	5.90835e-05	downregulated	-1.02744	0.050911		-1.93518	0.000234651	downregulated
ASPWEDRAFT_100770	1.63035	0.000107668	upregulated	0.816811	0.0586352		0.0581635	0.911014		0.613057	0.186469		0.0694602	0.897594		-0.449666	0.322339		-0.397549	0.418308
ASPWEDRAFT_101081	1.00665	0.00146679	upregulated	0.0926917	0.811917		0.0881993	0.81138		-0.0696166	0.869137		-0.808032	0.0096544		-0.0745466	0.845955		-0.358265	0.30618
ASPWEDRAFT_102227	1.32288	3.78492e-06	upregulated	-0.549603	0.075354		0.26761	0.394044		0.126553	0.739512		-0.721832	0.015718		-1.43109	2.77477e-07	downregulated	-0.305634	0.365558
ASPWEDRAFT_102867	1.24596	0.0243535	upregulated	0.968704	0.0656612		0.180071	0.76551		0.141621	0.83643		0.12438	0.845842		-0.116109	0.855763		0.405329	0.507353
ASPWEDRAFT_103274	1.03423	1.22495e-08	upregulated	-0.64337	0.000482612		-0.663579	0.000223349		-0.704545	0.000195177		-1.09723	1.26325e-09	downregulated	-0.668229	0.000243106		-1.03873	1.17355e-08	downregulated
ASPWEDRAFT_104504	1.28603	0.00189569	upregulated	0.0405666	0.938677		0.0582873	0.906997		0.985494	0.0185696		-0.204345	0.667556		-0.370226	0.402475		0.106727	0.845717
ASPWEDRAFT_105336	3.48333	3.18592e-05	upregulated	-1.66907	0.0733308		0.3217	0.748761		-1.12639	0.264869		-2.9265	0.000477854	downregulated	-1.85158	0.0263351	downregulated	-3.12259	0.000238817	downregulated
ASPWEDRAFT_105524	1.48091	0.00260916	upregulated	-0.983123	0.0462245		-0.604897	0.222287		-0.832023	0.111735		-2.98586	1.70812e-10	downregulated	-2.13093	2.7872e-06	downregulated	-1.78606	0.000189217	downregulated
ASPWEDRAFT_106212	1.77677	7.76537e-13	upregulated	0.64582	0.0149566		0.165192	0.575079		0.346178	0.243816		0.219807	0.464277		-0.17497	0.560612		0.233393	0.452654
ASPWEDRAFT_108116	1.46311	0.0371525	upregulated	-0.149511	0.868138		0.3147	0.683538		0.0486809	0.961908		-0.540802	0.457539		-1.2178	0.0711511		-2.1988	0.0108005	downregulated
ASPWEDRAFT_108514	1.12303	0.000227026	upregulated	-0.207018	0.561943		0.475218	0.11959		0.0871611	0.82906		-0.562481	0.0768024		-0.199086	0.563445		-0.8156	0.00926284
ASPWEDRAFT_109003	1.49372	8.39581e-08	upregulated	-0.140758	0.689129		-0.0463993	0.894903		-0.24309	0.47545		-1.23195	1.13855e-05	downregulated	-1.42236	1.51124e-07	downregulated	-1.05773	0.000217216	downregulated
ASPWEDRAFT_110660	3.27328	0.00115202	upregulated	1.27654	0.253684		1.19845	0.273413		1.91747	0.0816359		-0.685557	0.479324		-2.94251	0.0032692	downregulated	-1.65698	0.100502
ASPWEDRAFT_112009	1.03881	0.00121525	upregulated	0.489137	0.136774		0.582263	0.0606702		-0.380059	0.285218		0.171036	0.644362		0.397363	0.231361		0.656751	0.0454572
ASPWEDRAFT_112010	1.86449	4.8166e-12	upregulated	-0.0315805	0.934015		-0.0973909	0.779995		-0.298273	0.392254		-0.355882	0.249913		-0.11144	0.743521		-0.362654	0.254429
ASPWEDRAFT_112101	1.14699	0.000106274	upregulated	0.168992	0.638822		0.0850763	0.815594		0.672183	0.033085		-0.446279	0.163975		-0.829928	0.00484303		-0.0704507	0.86391
ASPWEDRAFT_112224	1.65503	0.00610203	upregulated	-0.485362	0.457659		0.37028	0.561725		1.17035	0.0553321		-0.806929	0.194553		-1.71331	0.00230639	downregulated	-0.62065	0.347211
ASPWEDRAFT_114044	1.25496	0.000915533	upregulated	0.396449	0.333705		0.280472	0.493922		0.178763	0.710013		-0.175556	0.691007		-0.372172	0.353632		-0.00286999	0.998332
ASPWEDRAFT_114720	1.60789	1.00405e-06	upregulated	-0.229032	0.566892		0.33242	0.355613		-0.490061	0.200567		-0.658268	0.0604897		0.123849	0.760585		-0.86794	0.0126871
ASPWEDRAFT_115058	1.2385	0.0104696	upregulated	-0.577984	0.238275		0.426961	0.379129		-0.254168	0.653437		-0.733191	0.131957		-1.20902	0.00711472	downregulated	-0.709044	0.154086
ASPWEDRAFT_115360	1.51416	3.24196e-20	upregulated	0.0382601	0.869199		-0.50785	0.0029936		-0.214896	0.287048		-0.81659	2.26516e-06		-0.859154	2.97377e-07		-0.652925	0.000222151
ASPWEDRAFT_115767	1.93021	0.00176976	upregulated	-0.851122	0.1836		-0.526291	0.414802		0.883497	0.182001		1.09453	0.0809548		-0.0425669	0.9594		1.8001	0.00285713	upregulated
ASPWEDRAFT_116185	1.07918	0.00649369	upregulated	-0.133487	0.778698		-0.810943	0.0320845		0.588372	0.155883		0.400322	0.339412		-0.551338	0.162073		0.801103	0.041367
ASPWEDRAFT_117496	1.41295	1.79748e-11	upregulated	-0.382837	0.104205		-0.0272446	0.922868		0.146866	0.593977		-0.706772	0.00145683		-0.171899	0.490748		-0.53534	0.0207409
ASPWEDRAFT_117838	1.21438	0.00157015	upregulated	-0.40571	0.322991		-0.00559534	0.990894		0.452297	0.284482		0.343933	0.41582		-0.370766	0.363873		0.537464	0.191237
ASPWEDRAFT_118405	1.15134	3.89352e-05	upregulated	-0.148712	0.671543		-0.1681	0.606554		0.796053	0.00631257		-0.0142468	0.969885		-0.293701	0.332071		0.608413	0.0352947
ASPWEDRAFT_119448	2.76276	1.5833e-14	upregulated	0.162966	0.734408		-0.0300303	0.950855		0.209672	0.667772		0.132505	0.774436		-1.36076	0.000218363	downregulated	0.597021	0.149749
ASPWEDRAFT_119583	1.48753	4.79734e-07	upregulated	0.118832	0.753234		-0.862427	0.00308981		0.361185	0.293827		-0.040846	0.917793		-0.841548	0.00477363		-0.103372	0.802166
ASPWEDRAFT_119892	1.09887	0.000313559	upregulated	0.242975	0.482857		0.970823	0.000684178		0.527805	0.108476		0.0233846	0.954257		-0.0448809	0.907379		0.130714	0.740157
ASPWEDRAFT_119992	1.06377	2.3456e-06	upregulated	-0.109665	0.699956		-0.0580577	0.835903		-0.723696	0.0028053		-0.768642	0.000866574		-0.203006	0.425024		-1.62824	9.23671e-13	downregulated
ASPWEDRAFT_120274	1.2984	0.00210464	upregulated	0.51755	0.240067		0.0501652	0.922621		0.0777313	0.893006		-0.289357	0.541281		0.245104	0.601032		-0.794664	0.0707946
ASPWEDRAFT_120695	1.03277	1.37022e-07	upregulated	-0.410243	0.051582		-0.46073	0.0221524		0.0119121	0.969186		-0.986892	6.71346e-07		-0.608527	0.00209765		-0.725862	0.00039506
ASPWEDRAFT_122788	4.5597	1.91513e-05	upregulated	-0.012613	0.993872		-2.09308	0.132863		-1.34497	0.371626		-5.68289	3.43626e-06	downregulated	-4.21502	5.37312e-05	downregulated	-6.00927	9.61049e-06	downregulated
ASPWEDRAFT_139325	1.66213	0.000616586	upregulated	0.0285353	0.96376		0.565473	0.260904		-0.602851	0.299106		-0.348056	0.524275		-0.772559	0.114219		-0.602998	0.261917
ASPWEDRAFT_146628	1.24443	1.25098e-06	upregulated	-0.260039	0.371865		-0.884827	0.000398809		-0.371241	0.203565		-1.13775	8.61523e-06	downregulated	-1.02189	4.77698e-05	downregulated	-0.599182	0.0285749
ASPWEDRAFT_147128	1.6822	0.0056878	upregulated	-0.888652	0.146302		0.697044	0.246434		-0.182237	0.809562		-1.40932	0.01732	downregulated	-2.5716	2.95915e-06	downregulated	-0.973344	0.120485
ASPWEDRAFT_151477	1.37867	0.00524497	upregulated	0.167701	0.784301		-0.388168	0.490342		-0.0661247	0.929306		1.12185	0.0121148	upregulated	0.261565	0.616168		1.02677	0.0267221	upregulated
ASPWEDRAFT_151570	1.24857	0.0195086	upregulated	-0.258755	0.695848		0.504881	0.35092		-0.140195	0.852888		-0.458007	0.420909		-0.14759	0.801545		0.10265	0.880507
ASPWEDRAFT_162202	2.60406	0.0390948	upregulated	1.16106	0.373785		0.148403	0.924709		0.70649	0.643721		-0.675281	0.592439		0.0687205	0.963284		-1.79946	0.168458
ASPWEDRAFT_166552	1.09969	1.40019e-13	upregulated	-0.373601	0.0208751		0.207915	0.2041		-0.0801982	0.690947		-1.01385	2.26719e-11	downregulated	-0.985	2.57489e-11		-0.810558	1.64769e-07
ASPWEDRAFT_166874	2.41905	0.0113449	upregulated	0.526543	0.644641		-0.894938	0.45166		-0.353333	0.798058		-1.19646	0.208684		-0.943225	0.302445		-3.00451	0.0105921	downregulated
ASPWEDRAFT_166932	1.19012	2.49404e-05	upregulated	-0.0522476	0.888505		0.0766045	0.825802		0.343361	0.294381		-0.0979249	0.77587		-0.333586	0.271204		-0.866934	0.00332755
ASPWEDRAFT_167000	1.31588	9.35633e-07	upregulated	-0.513035	0.0721684		-0.475827	0.0844088		-0.529893	0.0730376		-1.04825	0.000106217	downregulated	-0.784636	0.00355234		-1.12043	3.57328e-05	downregulated
ASPWEDRAFT_167024	1.71239	0.00306462	upregulated	-0.097253	0.892552		-0.238455	0.710895		0.828535	0.177056		-0.225108	0.738269		-1.13645	0.042809	downregulated	-0.0568815	0.944195
ASPWEDRAFT_168398	1.21229	0.000802999	upregulated	0.39137	0.313011		0.300889	0.430074		-0.0427279	0.933617		-0.213651	0.608741		-0.28991	0.465495		-0.541007	0.162294
ASPWEDRAFT_168455	1.04862	0.000108387	upregulated	0.479964	0.0873328		0.726104	0.00525727		-0.187916	0.573624		-0.33909	0.253535		0.550247	0.0410222		-1.00055	0.000276737	downregulated
ASPWEDRAFT_168789	1.00563	0.00872786	upregulated	0.73674	0.0466326		0.917969	0.00863149		0.66863	0.0879124		-0.1728	0.691222		0.144532	0.740188		-0.486829	0.236374
ASPWEDRAFT_169599	1.15153	0.00295029	upregulated	-0.94988	0.0145676		-0.473951	0.231629		0.546661	0.189059		-0.990719	0.00999199		-1.17534	0.00140223	downregulated	-1.01888	0.00955237	downregulated
ASPWEDRAFT_169717	2.48918	1.13878e-10	upregulated	-0.734147	0.108923		-0.658382	0.140553		0.0710668	0.90668		-1.49769	0.000174042	downregulated	-1.62922	2.2559e-05	downregulated	-1.16402	0.00465774	downregulated
ASPWEDRAFT_170184	1.32702	0.00748478	upregulated	0.757398	0.124612		-0.159729	0.773705		-0.707228	0.177171		-0.635632	0.214188		0.61922	0.211177		-1.11381	0.0232349	downregulated
ASPWEDRAFT_170420	1.48801	9.15064e-06	upregulated	0.929253	0.00586249		0.63866	0.0590881		0.258334	0.530262		0.0916416	0.826937		0.00328408	0.996525		0.349342	0.371262
ASPWEDRAFT_170441	1.11157	0.00422344	upregulated	-0.214073	0.646906		0.737806	0.0449112		0.898072	0.0218735		-0.802067	0.0453447		-0.783329	0.0400728		-0.0678493	0.898521
ASPWEDRAFT_171079	1.02075	0.000727777	upregulated	0.188313	0.591699		0.418578	0.166499		0.256032	0.466825		0.00105514	0.998088		-0.405685	0.192877		-0.188911	0.609449
ASPWEDRAFT_171717	1.60638	0.00867901	upregulated	0.117507	0.876857		0.700089	0.245461		-0.171985	0.824399		-0.332625	0.626111		0.248461	0.718615		-0.388728	0.585506
ASPWEDRAFT_171741	1.9722	0.00228044	upregulated	-0.200293	0.800003		0.186004	0.80389		-0.0164131	0.987783		-0.590524	0.402591		0.11557	0.884294		-0.870413	0.208535
ASPWEDRAFT_171870	1.23699	0.00258542	upregulated	0.125757	0.80107		0.73423	0.0617294		0.449095	0.320296		-0.560992	0.190701		-0.400685	0.353332		-0.390134	0.397987
ASPWEDRAFT_172174	2.83305	4.47411e-05	upregulated	0.639023	0.456762		0.891149	0.255233		0.183435	0.873117		-0.0374799	0.963054		0.0684779	0.929671		-0.315357	0.688331
ASPWEDRAFT_172329	1.02798	1.09223e-05	upregulated	0.0919556	0.756479		0.177196	0.497441		-0.535038	0.0382554		-0.401288	0.112064		0.401594	0.0950315		-0.452547	0.0767245
ASPWEDRAFT_172654	3.72468	0.0466459	upregulated	0.164395	0.952322		0.317866	0.902079		0.629117	0.819167		1.70577	0.132315		0.895525	0.461549		2.22063	0.0451723	upregulated
ASPWEDRAFT_172669	2.79764	0.00163119	upregulated	-0.597221	0.631258		0.491419	0.647732		-0.609272	0.660291		-0.896977	0.307797		-0.106832	0.913254		0.074392	0.946524
ASPWEDRAFT_173544	2.02192	0.00170339	upregulated	-1.15545	0.0770707		-1.00452	0.113896		-0.535679	0.471388		-1.97788	0.0015647	downregulated	-2.1078	0.000510522	downregulated	-1.29027	0.0506254
ASPWEDRAFT_174012	2.61738	3.88079e-08	upregulated	-1.18744	0.0733692		-0.639293	0.314969		-0.947278	0.198202		-0.915524	0.0567164		-1.1734	0.0101002	downregulated	-1.04865	0.0364026	downregulated
ASPWEDRAFT_174504	1.08072	9.35633e-07	upregulated	0.173176	0.504605		-0.480573	0.0300175		-0.465002	0.0523411		-0.686008	0.00236556		-0.92562	1.65323e-05		-0.836745	0.000185088
ASPWEDRAFT_174556	1.29121	1.62784e-07	upregulated	0.2205	0.441827		-0.00872701	0.979913		-0.479228	0.0790497		-1.16433	2.34882e-06	downregulated	-0.898983	0.000243106		-1.385	1.41039e-08	downregulated
ASPWEDRAFT_175216	1.33003	0.00252277	upregulated	-0.0512914	0.929365		0.0386095	0.945395		-0.361039	0.528676		-0.844872	0.0649255		-0.206155	0.671417		-0.354534	0.495415
ASPWEDRAFT_175217	1.18142	4.51198e-05	upregulated	-0.276803	0.394835		0.0476311	0.893354		-0.442286	0.170855		-0.779192	0.00820926		-0.800361	0.00510569		-0.600093	0.0508275
ASPWEDRAFT_175548	2.04941	0.000683274	upregulated	0.310809	0.674992		0.0787026	0.918706		0.505431	0.489976		0.510814	0.426016		0.103403	0.886459		0.409032	0.557002
ASPWEDRAFT_175625	1.62544	6.31722e-12	upregulated	0.607229	0.0162068		0.121286	0.673604		0.569586	0.0309357		-0.305025	0.268376		-0.497338	0.0490127		-0.145981	0.641178
ASPWEDRAFT_177335	2.85915	8.05585e-09	upregulated	0.141551	0.835994		0.359384	0.539956		-1.18056	0.0540244		-1.70417	0.00083313	downregulated	-1.11988	0.0271424	downregulated	-2.98323	1.23251e-08	downregulated
ASPWEDRAFT_179638	1.60607	0.0143869	upregulated	-0.364471	0.652638		-0.851262	0.254982		-0.307635	0.731309		-1.64129	0.0166818	downregulated	-1.36812	0.0316018	downregulated	-1.12542	0.113215
ASPWEDRAFT_180361	3.13087	0.00330636	upregulated	0.246378	0.871738		-0.46304	0.761507		0.237633	0.889957		-4.83958	0.00208899	downregulated	-1.80151	0.0594075		-5.45981	0.000494125	downregulated
ASPWEDRAFT_180394	1.03416	0.00123962	upregulated	-0.118028	0.767864		0.0420689	0.91577		-0.811085	0.026326		-1.14877	0.000467202	downregulated	-1.02257	0.00109295	downregulated	-0.986145	0.00384252
ASPWEDRAFT_180911	2.29457	0.046041	upregulated	0.0692884	0.958947		1.70913	0.102046		1.98848	0.0741793		1.68233	0.129641		0.416604	0.74121		1.99573	0.0710437
ASPWEDRAFT_181156	1.12485	0.0049421	upregulated	-0.638114	0.114152		-0.0372366	0.937458		-0.609716	0.151734		-1.21347	0.00161198	downregulated	-1.56365	2.1987e-05	downregulated	-0.841856	0.0371512
ASPWEDRAFT_181826	1.17841	0.0114408	upregulated	-0.36179	0.480147		0.658325	0.139439		0.0164463	0.981832		-1.15203	0.0118146	downregulated	-1.01487	0.0219621	downregulated	-1.37812	0.00326181	downregulated
ASPWEDRAFT_183842	1.97031	0.0132198	upregulated	-0.508215	0.570256		-1.35179	0.0849503		-1.48703	0.0834401		-1.1961	0.133606		-0.836554	0.293617		-1.64276	0.0384247	downregulated
ASPWEDRAFT_184203	1.83434	0.00795515	upregulated	-0.424642	0.611415		1.0815	0.103987		0.872419	0.248644		0.0711493	0.932238		-0.484239	0.50027		0.449292	0.559322
ASPWEDRAFT_187153	2.16679	0.00049057	upregulated	-0.299875	0.710954		0.212739	0.78011		-1.51799	0.0693083		-2.27009	0.000487336	downregulated	-1.46355	0.015581	downregulated	-2.79366	0.00010065	downregulated
ASPWEDRAFT_188272	1.41422	0.0408912	upregulated	-1.00763	0.204254		0.786611	0.233538		-0.00918077	0.99463		-0.30924	0.674617		0.153024	0.834152		-0.0272133	0.979042
ASPWEDRAFT_188479	2.84771	0.0347262	upregulated	-2.43053	0.174811		-0.0851424	0.959648		-1.44385	0.427287		-2.47889	0.06138		-0.878126	0.50836		-4.19579	0.0124327	downregulated
ASPWEDRAFT_203173	1.43249	1.62108e-06	upregulated	0.159795	0.667345		0.586356	0.0532603		0.100835	0.801193		-0.472347	0.148608		-0.783059	0.00944312		-0.446882	0.184341
ASPWEDRAFT_22952	1.62911	8.90836e-05	upregulated	0.304721	0.52763		-0.976409	0.0170104		-0.0881035	0.87921		-0.0784969	0.881103		-1.10837	0.00674787	downregulated	-0.350743	0.477902
ASPWEDRAFT_22988	1.04212	0.0049986	upregulated	0.450433	0.237357		0.945657	0.00549331		0.507684	0.199823		0.0272952	0.954469		0.116894	0.786657		-0.354495	0.394897
ASPWEDRAFT_237938	1.34577	0.00121525	upregulated	-0.350345	0.472113		-0.638562	0.156233		0.513377	0.277388		-0.536842	0.226083		-1.23533	0.00244794	downregulated	0.317262	0.506981
ASPWEDRAFT_23879	2.91652	0.00393343	upregulated	1.48142	0.165231		0.84172	0.467283		0.619074	0.657218		-0.514318	0.594163		-1.00823	0.261038		-1.68466	0.107348
ASPWEDRAFT_23954	1.89498	1.97241e-10	upregulated	0.361385	0.29233		0.0397619	0.919463		0.0412674	0.928342		-0.831518	0.00861449		-0.742816	0.0165518		-0.921317	0.00376903
ASPWEDRAFT_24229	2.68984	0.0212348	upregulated	-0.0261009	0.986547		1.14842	0.320349		-1.80915	0.215908		-3.96211	0.00137497	downregulated	-0.615945	0.613881		-3.16766	0.00928193	downregulated
ASPWEDRAFT_25228	1.89447	0.0403546	upregulated	0.846424	0.378137		1.27867	0.138443		1.21705	0.209118		-0.849808	0.359428		0.801329	0.307258		0.212509	0.841946
ASPWEDRAFT_25613	2.41602	1.88256e-13	upregulated	0.45914	0.229579		0.231354	0.560799		0.0642944	0.899572		0.322175	0.405037		-0.890756	0.00889414		0.802638	0.0234916
ASPWEDRAFT_26330	1.11643	0.00554039	upregulated	0.109968	0.829319		0.814288	0.0302312		-0.495197	0.332172		-0.305875	0.491111		-0.205628	0.639941		-0.242306	0.623833
ASPWEDRAFT_267162	1.47483	5.12812e-10	upregulated	-0.0641288	0.846788		-0.406112	0.129395		-0.590739	0.0413345		0.274204	0.307968		0.403078	0.103223		-0.114657	0.721625
ASPWEDRAFT_28252	1.47215	0.0387855	upregulated	-0.0446461	0.957931		0.395828	0.583273		-1.18928	0.0877386		-0.951858	0.172799		-0.256555	0.744216		-0.812021	0.263935
ASPWEDRAFT_28277	1.21792	0.00109534	upregulated	0.669388	0.0757165		0.681526	0.0589344		0.630682	0.108662		0.410994	0.308799		0.67764	0.0666989		-0.0843304	0.866599
ASPWEDRAFT_29126	1.14786	4.17261e-09	upregulated	-0.315827	0.157717		-0.676727	0.00116812		-0.742328	0.00104487		-0.364072	0.0916525		-0.622997	0.00176837		-0.54925	0.0108456
ASPWEDRAFT_29351	1.02033	3.79724e-05	upregulated	-0.173327	0.553377		0.890918	0.000149108		-0.0703895	0.832358		-1.16012	2.13245e-06	downregulated	-0.601823	0.0150779		-1.17628	1.99696e-06	downregulated
ASPWEDRAFT_30384	1.9124	0.0192975	upregulated	1.40957	0.0728493		0.629021	0.449353		-0.974354	0.295855		-0.973367	0.240236		0.648954	0.430213		-1.9003	0.0205237	downregulated
ASPWEDRAFT_30436	3.27432	0.0430681	upregulated	2.45454	0.112633		2.67774	0.0684461		-1.74183	0.449139		-1.90592	0.20059		0.494429	0.71764		-2.00172	0.217096
ASPWEDRAFT_309157	1.45397	0.00798188	upregulated	0.438051	0.463517		-0.0612765	0.927721		0.748505	0.204237		-0.906025	0.105479		-0.445213	0.433265		-0.448124	0.472799
ASPWEDRAFT_31084	1.52052	3.50338e-08	upregulated	0.120002	0.734408		-0.849207	0.00207218		-0.337519	0.300771		-0.694941	0.0173608		-0.546994	0.0591761		-0.44264	0.156568
ASPWEDRAFT_32470	2.25878	4.92107e-05	upregulated	-0.998382	0.085785		-1.02943	0.0643474		-0.427971	0.521434		-3.06383	1.093e-08	downregulated	-1.59814	0.0034056	downregulated	-2.38913	1.29866e-05	downregulated
ASPWEDRAFT_32718	1.50278	0.0111401	upregulated	-0.111799	0.882679		-0.425561	0.520759		0.751829	0.240829		0.365691	0.557598		-0.525087	0.383016		0.415739	0.524712
ASPWEDRAFT_32863	1.13984	1.11255e-24	upregulated	0.016108	0.919458		0.458047	6.77493e-05		0.423107	0.000634405		-0.292011	0.0183291		-0.15932	0.207421		-0.152864	0.264119
ASPWEDRAFT_32866	1.14991	0.0002745	upregulated	0.000905076	0.998695		0.775198	0.0105879		-0.578612	0.104883		-1.25048	8.3846e-05	downregulated	0.297158	0.379309		-1.14988	0.000425066	downregulated
ASPWEDRAFT_33726	1.02676	0.000235734	upregulated	-0.0997825	0.774087		-0.746798	0.00597591		0.385216	0.212936		-0.523102	0.0719267		-1.1414	1.75833e-05	downregulated	-0.782162	0.00614774
ASPWEDRAFT_34285	1.16735	0.0189326	upregulated	-0.919918	0.0944836		-0.291741	0.603008		0.530967	0.334595		-1.2089	0.0195306	downregulated	-0.872457	0.0713203		-0.615877	0.264937
ASPWEDRAFT_34296	1.07185	0.00711396	upregulated	-0.837037	0.0392576		-0.415879	0.31356		-0.856451	0.0481912		-1.27076	0.00125213	downregulated	-1.63109	1.65035e-05	downregulated	-1.43568	0.000419159	downregulated
ASPWEDRAFT_34326	1.96036	5.24924e-07	upregulated	-0.55836	0.204815		0.258173	0.567858		0.237548	0.638472		-1.00369	0.0140064	downregulated	-0.681586	0.0959583		-0.645282	0.138722
ASPWEDRAFT_34364	1.19983	0.00463144	upregulated	0.347241	0.451714		0.975459	0.0129111		0.574727	0.208545		0.530727	0.219213		0.278611	0.53664		0.715087	0.0940168
ASPWEDRAFT_34395	1.03812	0.0303148	upregulated	-0.381325	0.443599		-0.590822	0.193389		0.624673	0.200567		-1.07966	0.0168039	downregulated	-0.661371	0.14926		-0.25616	0.641979
ASPWEDRAFT_35178	1.34134	1.36125e-05	upregulated	-0.255705	0.482846		0.305797	0.362629		0.110143	0.789409		-0.515281	0.121402		-0.1368	0.712124		-0.390872	0.268389
ASPWEDRAFT_35200	1.20772	1.45049e-06	upregulated	-0.549301	0.0373379		-0.0973493	0.74709		-0.616766	0.0232593		-1.07463	1.98673e-05	downregulated	-0.561785	0.0288063		-1.10229	1.39957e-05	downregulated
ASPWEDRAFT_35476	1.14206	0.00454053	upregulated	0.575166	0.156793		0.7213	0.058682		0.00479152	0.994879		-1.02664	0.00838766	downregulated	-0.478897	0.242978		-1.18573	0.00224528	downregulated
ASPWEDRAFT_35563	1.07548	0.0012427	upregulated	-0.217536	0.567906		-0.0744261	0.850244		0.0589763	0.896871		0.132213	0.736582		-0.804252	0.0123449		0.526457	0.135033
ASPWEDRAFT_35853	2.73304	1.34314e-11	upregulated	0.120972	0.829576		0.818313	0.0574408		0.556876	0.259837		-2.25641	5.58716e-08	downregulated	-1.19372	0.00379531	downregulated	-2.06015	1.05123e-06	downregulated
ASPWEDRAFT_35904	2.06719	0.043277	upregulated	-0.390942	0.748587		0.0227176	0.985997		-1.94284	0.129627		-3.21196	0.00286111	downregulated	-0.000619673	1		-2.71961	0.0122409	downregulated
ASPWEDRAFT_36356	2.06685	0.0149346	upregulated	0.161836	0.875906		0.0271242	0.979971		-1.20263	0.173535		-1.46393	0.0789232		1.49367	0.0632814		-1.99297	0.0152783	downregulated
ASPWEDRAFT_36458	1.1052	3.26193e-05	upregulated	0.182353	0.563376		0.69078	0.00758676		0.894946	0.000918304		-0.254668	0.400314		-0.407727	0.142879		0.173747	0.599165
ASPWEDRAFT_374537	1.64509	2.12767e-09	upregulated	0.96944	0.000525538		0.185927	0.560247		0.588268	0.0545025		-1.69778	6.1211e-10	downregulated	-1.47967	4.0868e-08	downregulated	-1.47684	1.06768e-07	downregulated
ASPWEDRAFT_37683	1.01418	0.00112007	upregulated	-0.765336	0.0218604		-0.346193	0.307565		-0.835305	0.0218848		-0.397956	0.238076		-0.961062	0.00173461		0.148223	0.706579
ASPWEDRAFT_37837	1.09537	0.00610466	upregulated	0.584327	0.143877		-0.124149	0.783279		-0.286075	0.53267		-0.441558	0.29445		-0.181394	0.686648		-0.309995	0.497702
ASPWEDRAFT_37841	1.03698	0.013221	upregulated	0.28866	0.525224		0.182846	0.685071		0.571809	0.187359		0.647334	0.120643		-0.129218	0.787952		1.01726	0.0113796	upregulated
ASPWEDRAFT_38204	1.20439	0.000470909	upregulated	-0.113153	0.790601		-0.980488	0.00279606		-0.0527883	0.912305		-0.685954	0.0517157		-0.310763	0.406368		-0.636063	0.0792501
ASPWEDRAFT_384920	1.37819	0.00317058	upregulated	0.29231	0.580028		0.766874	0.0879359		0.140501	0.810463		-0.0375103	0.950465		-0.127407	0.818956		0.149188	0.807257
ASPWEDRAFT_39034	1.01409	4.05421e-05	upregulated	-0.154657	0.60068		0.282942	0.274683		-0.241139	0.406208		-0.493823	0.0561533		-0.120329	0.681993		-0.254734	0.377055
ASPWEDRAFT_39203	1.00402	1.53824e-06	upregulated	0.414066	0.0597287		0.584742	0.00444599		0.00355855	0.993078		0.00606924	0.98297		-0.030372	0.913155		-0.0643122	0.827219
ASPWEDRAFT_39481	1.10352	1.98115e-13	upregulated	-0.617821	7.12709e-05		-0.723135	1.7727e-06		0.236107	0.184488		-0.565194	0.000367389		-0.890437	2.7573e-09		-0.366018	0.0287624
ASPWEDRAFT_39760	2.30382	0.013462	upregulated	-0.452817	0.71288		0.737372	0.460362		0.271044	0.834283		-1.13961	0.22031		-1.54712	0.0795811		-0.874354	0.380156
ASPWEDRAFT_39854	1.82494	5.51062e-08	upregulated	-0.079213	0.867598		0.359283	0.345972		0.2708	0.538397		0.0692352	0.870883		0.0753862	0.857846		0.596534	0.0965434
ASPWEDRAFT_40024	1.06308	0.0304957	upregulated	-0.204047	0.724163		-0.338293	0.519432		0.243526	0.678589		1.01209	0.0217723	upregulated	-0.397498	0.425648		1.53761	0.000305982	upregulated
ASPWEDRAFT_40170	1.05218	1.35788e-09	upregulated	-0.0461655	0.844909		-0.126929	0.531293		0.193152	0.36202		-0.401619	0.0323859		0.131449	0.521503		-0.113087	0.618678
ASPWEDRAFT_40281	1.46256	0.000432672	upregulated	-0.320848	0.49905		0.67114	0.103859		-0.288941	0.566074		-0.659377	0.131662		-1.14703	0.00441251	downregulated	-0.60982	0.17613
ASPWEDRAFT_40710	1.32762	2.93634e-06	upregulated	0.337481	0.284307		0.0699961	0.841812		-0.0727136	0.852445		-0.979668	0.000657769		-0.882347	0.00174515		-0.930347	0.00142411
ASPWEDRAFT_409937	1.52451	0.00339094	upregulated	-0.231402	0.707236		-0.998573	0.04515		-0.293994	0.636307		0.628396	0.249402		-1.19776	0.0160091	downregulated	1.11502	0.0319589	upregulated
ASPWEDRAFT_41033	2.81394	0.045628	upregulated	2.13702	0.110893		1.90193	0.151997		2.36776	0.0893714		-1.83473	0.177143		-1.19711	0.325659		-0.513383	0.723158
ASPWEDRAFT_41431	1.08591	5.66182e-05	upregulated	-0.217398	0.481369		0.341705	0.220306		-0.0996235	0.775159		-1.73827	1.41825e-11	downregulated	-1.18896	3.51004e-06	downregulated	-1.18016	8.78733e-06	downregulated
ASPWEDRAFT_41473	3.77181	8.78799e-06	upregulated	-0.952483	0.452502		-0.845617	0.493358		-0.811404	0.570808		-0.989351	0.222319		-2.52816	0.00127321	downregulated	-1.18802	0.154946
ASPWEDRAFT_41672	1.13651	0.000153736	upregulated	-0.460735	0.146324		-0.980165	0.000712318		0.623113	0.049763		-0.510238	0.107961		-1.41034	6.95291e-07	downregulated	-0.0159722	0.972539
ASPWEDRAFT_41707	1.86425	0.0118215	upregulated	-0.248228	0.796988		0.771787	0.308226		0.322173	0.741219		-0.502466	0.5181		-1.21107	0.0890699		-0.280297	0.754183
ASPWEDRAFT_41708	1.66477	0.00262521	upregulated	0.171279	0.80559		-1.07377	0.0747954		0.134193	0.861219		-1.44198	0.0103339	downregulated	-1.19644	0.0261525	downregulated	-0.790321	0.186598
ASPWEDRAFT_42315	1.02539	2.71489e-05	upregulated	0.334991	0.203093		0.652563	0.00595205		-0.215612	0.458		-0.384922	0.14432		0.217475	0.425454		-0.858829	0.000477045
ASPWEDRAFT_42319	1.06197	0.00170339	upregulated	-0.31727	0.409579		0.789281	0.0132207		-0.387045	0.346511		0.0646185	0.875595		0.12604	0.745839		0.194344	0.635572
ASPWEDRAFT_42583	2.39251	0.00328279	upregulated	1.41517	0.0825689		-0.497039	0.592463		-1.13494	0.254243		-0.859515	0.315015		-1.18689	0.138562		-0.787442	0.379923
ASPWEDRAFT_429260	1.33907	0.00281708	upregulated	-0.31151	0.535085		0.956722	0.023397		0.422181	0.400096		-1.18585	0.00656923	downregulated	-1.33587	0.00147324	downregulated	-1.22863	0.00525316	downregulated
ASPWEDRAFT_42949	1.63699	1.31266e-05	upregulated	-0.231832	0.612123		-0.360589	0.380957		0.188855	0.697178		-1.24732	0.00104195	downregulated	-1.43022	9.47555e-05	downregulated	-0.887043	0.0255899
ASPWEDRAFT_436420	1.57366	0.00848266	upregulated	-0.744	0.223935		0.510533	0.399189		0.520163	0.432576		-0.161117	0.817747		-0.890104	0.129288		-0.0198915	0.984706
ASPWEDRAFT_43810	2.03117	2.51287e-20	upregulated	0.693716	0.00334919		0.700355	0.0023392		-0.135208	0.656513		-1.52092	2.08303e-11	downregulated	-0.515231	0.0294567		-1.62498	1.2063e-12	downregulated
ASPWEDRAFT_43924	1.86088	0.0249844	upregulated	-0.528727	0.564572		1.08897	0.163672		0.662089	0.467558		0.367014	0.685077		-0.743415	0.373137		0.408602	0.670555
ASPWEDRAFT_440830	1.34005	0.0002047	upregulated	0.501432	0.199714		0.97914	0.00456775		-0.16574	0.751702		-1.29855	0.000918454	downregulated	0.132229	0.745839		-1.33855	0.00140898	downregulated
ASPWEDRAFT_44191	1.99946	1.59378e-07	upregulated	0.105688	0.84821		-0.181782	0.726058		-0.220093	0.708969		-0.866006	0.0287209		-0.747101	0.0476108		-0.81212	0.0515509
ASPWEDRAFT_44204	1.34512	3.57022e-07	upregulated	0.262101	0.386291		-0.290504	0.310029		-0.0088639	0.983854		-0.87424	0.00124228		-0.711571	0.00798452		-0.571196	0.045713
ASPWEDRAFT_44330	1.00197	0.000522165	upregulated	-0.146756	0.684152		0.410468	0.162242		0.481529	0.130743		0.0194546	0.959234		0.224164	0.466813		1.20732	4.6322e-06	upregulated
ASPWEDRAFT_44398	1.32872	1.20417e-11	upregulated	0.434762	0.0405033		-0.131843	0.567902		0.637373	0.00249291		-0.137457	0.569774		-0.572782	0.0049402		-0.112671	0.667755
ASPWEDRAFT_44560	1.17864	0.00184867	upregulated	0.477144	0.225923		0.911236	0.0103779		0.90094	0.0184963		-0.259241	0.543306		-0.445559	0.255816		-0.180309	0.703439
ASPWEDRAFT_447672	2.04463	1.66663e-14	upregulated	0.359479	0.241678		-0.393196	0.178266		-0.0478624	0.905086		-1.86296	5.00316e-12	downregulated	-2.17529	9.18106e-17	downregulated	-1.43845	1.75633e-07	downregulated
ASPWEDRAFT_44886	1.91258	3.70688e-08	upregulated	-0.150763	0.741478		0.638381	0.0794327		0.669044	0.0895708		-0.632265	0.0937747		-0.649856	0.0737146		0.139265	0.769366
ASPWEDRAFT_449874	1.149	0.00272879	upregulated	-0.217356	0.64294		-0.452318	0.284652		-0.888686	0.0588718		-0.508062	0.21489		-0.386993	0.330451		-1.19978	0.00491207	downregulated
ASPWEDRAFT_45147	1.32742	0.000139301	upregulated	-0.545313	0.170404		-0.666128	0.0833799		0.01686	0.977136		-1.20553	0.000966731	downregulated	-1.23029	0.000398593	downregulated	-0.494663	0.210698
ASPWEDRAFT_452813	1.26596	1.0649e-07	upregulated	-0.270431	0.321473		-0.611002	0.011803		-0.63317	0.0154258		-0.4448	0.0857752		-0.852114	0.000342623		-0.69886	0.00561064
ASPWEDRAFT_45469	1.11527	0.0475245	upregulated	0.560755	0.31656		-0.404533	0.503002		0.511953	0.401662		0.797019	0.121861		1.17551	0.0124437	upregulated	1.36931	0.00500907	upregulated
ASPWEDRAFT_45623	2.96485	3.23078e-28	upregulated	0.54805	0.0784373		0.772653	0.0077413		-0.630848	0.0641159		-0.198173	0.55017		-0.990181	0.000338755		-0.812373	0.00558341
ASPWEDRAFT_45686	1.77118	0.000673845	upregulated	-0.0386883	0.955042		0.270083	0.648673		-0.355972	0.589681		-0.449131	0.434311		-0.428147	0.445439		0.157244	0.820444
ASPWEDRAFT_46686	1.38913	5.37399e-09	upregulated	-0.550658	0.0378705		-0.302628	0.260823		0.089214	0.788112		-0.163993	0.567797		-0.802388	0.000877766		0.395212	0.137089
ASPWEDRAFT_467293	1.87229	3.70688e-08	upregulated	-0.619521	0.108661		0.301101	0.438677		0.843348	0.0245319		-1.094	0.00195781	downregulated	-0.634012	0.073996		-0.667069	0.0760971
ASPWEDRAFT_46988	1.35297	6.14169e-05	upregulated	-0.318035	0.401428		-0.407828	0.247403		-0.371626	0.341745		-1.50814	5.00512e-06	downregulated	-0.997338	0.00251565		-1.08385	0.00149535	downregulated
ASPWEDRAFT_47287	1.20296	3.02823e-05	upregulated	-0.0656788	0.862158		-0.358233	0.234761		0.998242	0.000607543		-0.517698	0.090499		-0.213827	0.515168		-0.134191	0.721793
ASPWEDRAFT_47659	1.94008	7.22098e-10	upregulated	0.114059	0.783571		0.664701	0.0413795		0.301577	0.436006		-0.994386	0.00261921		-0.761069	0.0206382		-0.639504	0.0680878
ASPWEDRAFT_481722	1.61456	1.52086e-08	upregulated	0.23124	0.507679		0.443594	0.149187		-0.699972	0.041804		-0.123666	0.725044		-0.236389	0.468335		-0.158444	0.671242
ASPWEDRAFT_48341	1.25973	4.63814e-07	upregulated	-0.248493	0.386795		0.730601	0.00305611		0.656364	0.0139899		-0.693397	0.0077143		-0.553098	0.0318307		-0.650109	0.0143883
ASPWEDRAFT_48412	1.80291	0.0017656	upregulated	-0.718579	0.239637		-0.669465	0.258219		-0.98946	0.112431		-0.793239	0.189681		0.759449	0.192992		-0.629881	0.324434
ASPWEDRAFT_49033	1.03484	4.28465e-06	upregulated	-0.366635	0.133846		-0.716529	0.00151098		0.14245	0.617977		-1.07895	2.00897e-06	downregulated	-1.61089	1.38293e-13	downregulated	-0.913294	8.70337e-05
ASPWEDRAFT_49611	1.03119	8.17711e-05	upregulated	0.240611	0.410878		-0.343209	0.200922		-0.628517	0.0212249		-0.955886	0.000206091		-0.656798	0.0110873		-1.1673	4.71294e-06	downregulated
ASPWEDRAFT_49742	1.69788	0.00858566	upregulated	0.267274	0.736253		0.429774	0.54475		0.310183	0.713274		-0.887328	0.182235		-0.227693	0.744864		-0.982628	0.162195
ASPWEDRAFT_49919	1.23506	0.0018919	upregulated	0.253164	0.578659		0.59451	0.128698		-0.191477	0.701786		-1.64615	2.4613e-05	downregulated	-1.09518	0.00410841	downregulated	-1.64713	3.61708e-05	downregulated
ASPWEDRAFT_50587	1.14635	0.000114243	upregulated	-0.0621233	0.872722		0.158615	0.636839		0.869152	0.00414238		-0.240969	0.478415		-0.661	0.0258862		0.220552	0.540353
ASPWEDRAFT_50588	1.06925	0.000348559	upregulated	0.400834	0.205775		0.575611	0.0492702		0.399629	0.232727		-0.435335	0.174367		-0.484324	0.112335		-0.644448	0.0427003
ASPWEDRAFT_51816	1.40246	5.303e-06	upregulated	0.336873	0.335123		0.463011	0.151927		0.792619	0.0163698		-0.025175	0.951783		-0.440723	0.175096		-0.120937	0.772498
ASPWEDRAFT_52264	1.03457	3.40869e-06	upregulated	0.401559	0.0896049		0.182534	0.464131		0.388958	0.119215		-0.364771	0.135074		0.00278032	0.994544		-0.727212	0.00203095
ASPWEDRAFT_52428	1.39544	6.81071e-05	upregulated	-0.344832	0.381889		0.252667	0.514721		-0.0189683	0.971486		-0.106323	0.804385		-0.730446	0.0382161		-0.231813	0.591701
ASPWEDRAFT_52534	1.96242	0.00758006	upregulated	-1.38763	0.0525449		-0.00926304	0.991739		-0.134669	0.889393		-0.362334	0.661661		-1.57823	0.0232889	downregulated	-0.171802	0.85772
ASPWEDRAFT_52627	1.01091	0.0306758	upregulated	-0.214783	0.680165		-0.188408	0.703416		0.53486	0.267863		-0.834598	0.0618529		-1.20833	0.00405773	downregulated	-0.463487	0.347081
ASPWEDRAFT_53114	1.08511	4.59795e-09	upregulated	0.423519	0.0312745		-0.430347	0.0230835		0.310297	0.141665		-0.481612	0.0144734		-1.0741	2.61772e-09	downregulated	-0.692629	0.000318839
ASPWEDRAFT_53203	1.32115	6.20405e-06	upregulated	0.67121	0.0257179		0.825558	0.00381484		0.969039	0.00122764		0.281392	0.401919		-0.0586262	0.876199		0.710471	0.0207434
ASPWEDRAFT_53736	1.99519	1.32828e-08	upregulated	0.268598	0.526034		0.961158	0.00641105		-0.0980327	0.840226		-0.573885	0.142167		0.0233685	0.964186		-0.554222	0.165531
ASPWEDRAFT_54409	1.01098	6.93078e-06	upregulated	0.569636	0.012765		-0.172961	0.487557		0.477457	0.0482182		0.166689	0.528463		-0.0884094	0.74942		0.00616902	0.989304
ASPWEDRAFT_54681	1.42529	0.00236701	upregulated	-0.308436	0.563574		0.300284	0.549851		-0.945308	0.0536869		-0.639493	0.192273		0.908129	0.0454881		-0.824286	0.0903529
ASPWEDRAFT_549883	1.03792	0.00126578	upregulated	0.463239	0.16261		0.820545	0.00668634		-0.230323	0.543515		0.596904	0.0675366		0.688049	0.0280054		0.425446	0.221728
ASPWEDRAFT_55660	3.72124	0.00194985	upregulated	1.65254	0.220964		0.770397	0.622845		1.92141	0.172223		0.0459026	0.963142		-0.0977381	0.917335		-0.097347	0.928301
ASPWEDRAFT_564371	1.118	0.000410812	upregulated	-0.135303	0.72785		0.796551	0.00825258		-0.0328062	0.943786		-0.44499	0.188659		-0.00631404	0.989322		-0.0441914	0.921184
ASPWEDRAFT_582797	1.048	1.00857e-07	upregulated	0.52878	0.00918896		0.612888	0.00165245		0.340603	0.127498		0.0609982	0.807581		-0.23206	0.28654		-0.022359	0.940044
ASPWEDRAFT_60025	1.16149	0.000893362	upregulated	-0.421469	0.265955		-0.93257	0.00709207		-0.044288	0.930374		0.836676	0.0145944		0.00719188	0.988861		1.20812	0.000296705	upregulated
ASPWEDRAFT_605622	1.00195	0.0258239	upregulated	-0.430741	0.346085		0.227247	0.625779		-0.566266	0.221021		-0.334411	0.48205		0.0873201	0.868268		0.320356	0.521487
ASPWEDRAFT_618951	2.08323	5.23751e-06	upregulated	-0.822826	0.154531		0.288732	0.605994		-0.0637483	0.933755		-0.150516	0.77587		-0.554881	0.234084		0.670202	0.149844
ASPWEDRAFT_61986	2.16	0.0450291	upregulated	-0.955034	0.377078		-0.718452	0.501266		1.54139	0.148382		-0.799394	0.474744		-2.53378	0.00850102	downregulated	-0.433527	0.733419
ASPWEDRAFT_648719	1.14959	2.49359e-06	upregulated	-0.106849	0.730525		0.891754	0.000151225		-0.45164	0.103325		-0.597245	0.0197998		0.19837	0.474328		-0.282277	0.324342
ASPWEDRAFT_65350	1.71757	4.95765e-06	upregulated	-0.537862	0.210689		-0.388702	0.362975		-0.0896871	0.871323		-0.135909	0.76639		-0.841388	0.0269153		-0.0312148	0.954882
ASPWEDRAFT_654818	2.22099	1.62701e-07	upregulated	-0.712845	0.128199		0.383396	0.418568		0.344621	0.513677		-0.58556	0.21572		-1.10972	0.0100072	downregulated	-0.180081	0.753721
ASPWEDRAFT_656387	2.69983	4.32287e-05	upregulated	-0.844368	0.275573		0.209671	0.797754		-0.592331	0.488376		-0.929837	0.184594		-2.40686	0.000189638	downregulated	-2.99122	2.08328e-05	downregulated
ASPWEDRAFT_66439	3.02022	3.45554e-05	upregulated	-1.26489	0.107623		1.29999	0.0763632		-0.720599	0.410045		-1.89213	0.0108355	downregulated	-1.62648	0.0259116	downregulated	-1.60834	0.0357254	downregulated
ASPWEDRAFT_66683	1.38975	0.00481847	upregulated	0.84003	0.0857698		0.909512	0.0509623		-0.983868	0.0539263		0.558247	0.280825		1.26071	0.00618481	upregulated	-0.445168	0.420262
ASPWEDRAFT_67200	1.08811	0.00110021	upregulated	0.0459582	0.912964		-0.461673	0.167999		0.297218	0.436856		-0.392474	0.274257		-0.158145	0.680868		-0.347007	0.356
ASPWEDRAFT_674520	1.6577	0.000112101	upregulated	0.904029	0.0395113		-0.960011	0.0337203		0.887751	0.0540832		0.383762	0.418154		-0.299388	0.530756		0.994313	0.021299
ASPWEDRAFT_67571	1.20678	1.51254e-05	upregulated	-0.450132	0.128492		-0.27373	0.361426		0.122893	0.733336		-0.0322072	0.931536		-1.07898	6.45468e-05	downregulated	0.920061	0.0011389
ASPWEDRAFT_68221	1.12678	5.33866e-06	upregulated	-0.669234	0.00761669		0.138223	0.625702		-0.398016	0.149053		-0.368088	0.175082		-0.577876	0.021352		-0.0827268	0.809539
ASPWEDRAFT_68349	3.48475	9.34246e-10	upregulated	-0.22115	0.777107		0.684032	0.284991		-0.168962	0.841425		-1.78272	0.00235003	downregulated	-0.889938	0.139079		-2.26774	0.000123017	downregulated
ASPWEDRAFT_69425	1.95383	0.00629293	upregulated	-0.470087	0.564572		-0.0647143	0.940273		0.55574	0.496401		1.71856	0.0111292	upregulated	-0.488762	0.522438		2.91539	7.58005e-06	upregulated
ASPWEDRAFT_716178	1.07497	0.000874954	upregulated	0.171987	0.652432		0.146962	0.687589		-0.217724	0.577156		-1.08211	0.000673516	downregulated	-0.770343	0.0144406		-1.05196	0.00118095	downregulated
ASPWEDRAFT_716851	1.4252	0.000142489	upregulated	0.0538189	0.911947		-0.105295	0.816429		0.132957	0.785315		-1.32184	0.000407239	downregulated	-0.926864	0.0122762		-1.03236	0.00752752	downregulated
ASPWEDRAFT_71912	2.54028	0.0423397	upregulated	0.761187	0.584616		1.04227	0.407667		-0.382797	0.827614		-2.63566	0.0415636	downregulated	-1.15659	0.324328		-2.07747	0.114369
ASPWEDRAFT_740859	1.03611	0.0306292	upregulated	-0.531021	0.295249		-0.879523	0.0685898		0.557744	0.269216		0.912193	0.0360666		0.149553	0.77552		1.50908	0.000293259	upregulated
ASPWEDRAFT_740865	3.75305	0.0443342	upregulated	1.9991	0.289613		2.13059	0.235666		-0.0172712	0.996351		-0.843307	0.628045		-0.182225	0.923549		-2.08916	0.248224
ASPWEDRAFT_744486	1.08547	0.00126578	upregulated	-0.0770605	0.858345		-0.922008	0.00532677		0.149439	0.726459		0.198464	0.604356		-0.353006	0.319342		0.641582	0.0624148
ASPWEDRAFT_747480	1.05939	0.000128594	upregulated	-0.212125	0.511755		0.368414	0.19558		-0.893093	0.0028056		-1.61523	6.34709e-09	downregulated	-0.561242	0.0441273		-1.393	9.68907e-07	downregulated
ASPWEDRAFT_97262	1.15999	0.0359016	upregulated	-1.01573	0.0504813		0.378495	0.492084		0.19295	0.767273		-0.151552	0.807581		-0.275162	0.641122		0.101841	0.884609
ASPWEDRAFT_102071	-6.79822	5.16762e-12	downregulated	-4.85886	9.41244e-10	downregulated	-5.38258	2.37589e-11	downregulated	-3.64735	7.15145e-06	downregulated	2.3926	0.0331979	upregulated	0.460436	0.749686		2.43407	0.0347526	upregulated
ASPWEDRAFT_102455	-5.98276	1.17203e-19	downregulated	-3.4681	9.04668e-08	downregulated	-3.66766	8.09148e-09	downregulated	-1.93345	0.00602177	downregulated	3.16805	5.57069e-06	upregulated	2.05853	0.00351576	upregulated	3.68116	9.73813e-08	upregulated
ASPWEDRAFT_102505	-7.63931	7.35243e-07	downregulated	-4.42085	4.07878e-07	downregulated	-4.27661	6.6126e-07	downregulated	-3.88765	1.65773e-05	downregulated	1.68277	0.425119		5.03635	0.0012371	upregulated	2.07075	0.328016
ASPWEDRAFT_107158	-1.34839	6.11543e-10	downregulated	-1.67477	1.83925e-15	downregulated	-1.96904	1.38356e-21	downregulated	-1.34239	7.43546e-10	downregulated	-0.418505	0.0811238		-0.280338	0.250695		-0.0566356	0.856948
ASPWEDRAFT_109092	-1.55488	1.03817e-05	downregulated	-1.06884	0.00231878	downregulated	-1.72816	1.84441e-07	downregulated	-1.10349	0.00229858	downregulated	-0.495061	0.202452		-0.148823	0.730711		0.237458	0.590518
ASPWEDRAFT_110631	-1.60496	0.000176954	downregulated	-2.08804	1.99416e-07	downregulated	-2.80644	5.2639e-13	downregulated	-1.38901	0.00120538	downregulated	0.149675	0.772047		0.248006	0.616914		0.319631	0.537296
ASPWEDRAFT_112566	-3.35061	4.52099e-07	downregulated	-2.72346	3.00865e-05	downregulated	-2.99438	2.4837e-06	downregulated	-3.52582	8.95425e-08	downregulated	-0.645536	0.407191		1.38028	0.0452776	upregulated	-0.50783	0.54499
ASPWEDRAFT_113807	-1.55496	7.35243e-07	downregulated	-1.88427	3.62472e-10	downregulated	-2.0097	9.31411e-12	downregulated	-2.15415	1.34169e-12	downregulated	-1.19579	0.000167041	downregulated	-0.525813	0.114446		-1.22558	0.000123597	downregulated
ASPWEDRAFT_113870	-1.68053	0.00337001	downregulated	-3.32406	1.06464e-10	downregulated	-2.99799	3.87548e-09	downregulated	-2.0927	0.000131464	downregulated	-0.731015	0.225245		-1.87305	0.000495629	downregulated	-0.611566	0.33536
ASPWEDRAFT_114075	-2.03211	4.27084e-06	downregulated	-1.95397	4.74474e-06	downregulated	-2.14416	2.82594e-07	downregulated	-1.79558	5.3735e-05	downregulated	-0.525362	0.295298		-0.0449859	0.941739		-0.208749	0.723029
ASPWEDRAFT_114939	-1.21807	0.000796701	downregulated	-1.28262	0.000160655	downregulated	-1.89202	1.20034e-08	downregulated	-1.27379	0.00034018	downregulated	-0.959717	0.0141867		-0.77569	0.0403842		-0.926571	0.022463
ASPWEDRAFT_115636	-4.35705	8.99466e-17	downregulated	-1.31597	0.0116804	downregulated	-1.03845	0.0432177	downregulated	-1.39104	0.00996637	downregulated	-0.571558	0.427832		0.730929	0.24353		-0.88513	0.239251
ASPWEDRAFT_117599	-2.03895	0.04521	downregulated	-2.05225	0.028288	downregulated	-3.50632	5.31369e-05	downregulated	-4.53297	4.10082e-07	downregulated	-3.17806	0.000517484	downregulated	0.359216	0.747948		-3.27244	0.000380774	downregulated
ASPWEDRAFT_118697	-3.22301	1.25018e-11	downregulated	-2.165	2.69559e-06	downregulated	-2.27296	5.54472e-07	downregulated	-2.39821	5.05614e-07	downregulated	-3.28457	6.68685e-06	downregulated	-1.61895	0.00425378	downregulated	-0.961483	0.122428
ASPWEDRAFT_118931	-2.55834	6.75274e-07	downregulated	-2.00723	6.16042e-05	downregulated	-1.4324	0.00414949	downregulated	-1.74869	0.000883164	downregulated	0.840028	0.143306		0.0435338	0.953977		1.45828	0.00748058	upregulated
ASPWEDRAFT_118940	-1.6772	0.000220339	downregulated	-3.57666	5.23661e-18	downregulated	-2.35397	1.47763e-08	downregulated	-2.27279	1.82584e-07	downregulated	-1.66325	0.000179902	downregulated	-1.29235	0.00336634	downregulated	-1.65636	0.000215062	downregulated
ASPWEDRAFT_119865	-2.1668	0.0415782	downregulated	-2.1221	0.027471	downregulated	-3.5359	0.000245662	downregulated	-2.62178	0.00967417	downregulated	-0.473346	0.705442		0.348862	0.774971		-1.36973	0.288678
ASPWEDRAFT_121166	-2.23359	2.10606e-05	downregulated	-2.66667	8.75841e-08	downregulated	-3.78375	1.12051e-12	downregulated	-1.94068	0.000183658	downregulated	-0.442851	0.51461		-0.319794	0.63305		-0.22298	0.779886
ASPWEDRAFT_121624	-1.22224	0.00150801	downregulated	-2.05784	4.90113e-09	downregulated	-1.51047	1.69019e-05	downregulated	-2.07819	8.58874e-09	downregulated	-0.230386	0.603214		0.372651	0.364464		-1.1316	0.00337046	downregulated
ASPWEDRAFT_121698	-1.35317	0.0374769	downregulated	-1.50323	0.0107414	downregulated	-2.892	3.07544e-07	downregulated	-1.99877	0.000910955	downregulated	-0.45632	0.516721		-0.656127	0.319006		-0.602291	0.402052
ASPWEDRAFT_122155	-2.01828	2.63618e-06	downregulated	-3.30288	2.76753e-16	downregulated	-2.67949	2.52261e-11	downregulated	-4.01126	7.18813e-23	downregulated	-1.77187	3.7705e-05	downregulated	-1.29866	0.00242892	downregulated	-1.19565	0.00762917	downregulated
ASPWEDRAFT_124182	-4.63307	1.64751e-12	downregulated	-4.77849	4.60069e-15	downregulated	-3.02269	4.59895e-09	downregulated	-3.59118	4.1718e-10	downregulated	2.20288	0.00277222	upregulated	2.72778	7.21941e-05	upregulated	0.0400672	0.978965
ASPWEDRAFT_131128	-2.46354	6.84992e-09	downregulated	-2.45891	2.69516e-09	downregulated	-2.21015	6.22496e-08	downregulated	-1.79187	3.81508e-05	downregulated	-1.10657	0.0189689	downregulated	-0.273803	0.60051		-0.226222	0.699483
ASPWEDRAFT_142195	-2.70885	8.9664e-05	downregulated	-3.39988	1.88529e-07	downregulated	-3.49398	4.61669e-08	downregulated	-4.10632	4.71429e-10	downregulated	-0.861283	0.257071		0.887505	0.226233		-0.370989	0.672465
ASPWEDRAFT_143579	-2.316	2.09877e-06	downregulated	-2.3139	7.0333e-07	downregulated	-2.29685	5.86694e-07	downregulated	-1.86486	0.000139172	downregulated	0.0291044	0.967078		-0.299871	0.620356		-0.27743	0.68279
ASPWEDRAFT_150991	-1.70677	2.54968e-05	downregulated	-3.69547	6.00306e-23	downregulated	-3.3926	6.4194e-20	downregulated	-1.75355	1.22421e-05	downregulated	-0.293156	0.537978		-1.68172	1.86877e-05	downregulated	0.501229	0.276866
ASPWEDRAFT_152042	-1.53994	1.18581e-05	downregulated	-1.81564	4.38983e-08	downregulated	-1.59435	1.10527e-06	downregulated	-2.45598	8.20094e-12	downregulated	-0.932575	0.0269617		-0.486751	0.238707		-0.740345	0.0979716
ASPWEDRAFT_159005	-1.74094	0.00317003	downregulated	-1.1747	0.0383764	downregulated	-2.32202	1.46041e-05	downregulated	-1.40205	0.0164537	downregulated	0.258874	0.714223		-0.167846	0.818169		0.804891	0.212471
ASPWEDRAFT_160167	-2.21726	3.31455e-15	downregulated	-2.05286	1.7476e-13	downregulated	-1.68143	1.2891e-09	downregulated	-1.31028	8.98334e-06	downregulated	-1.40499	1.8282e-06	downregulated	-1.01924	0.000504045	downregulated	-0.72023	0.0220146
ASPWEDRAFT_165275	-3.52594	7.07381e-05	downregulated	-5.44441	1.80339e-07	downregulated	-5.26751	2.38638e-07	downregulated	-3.27037	0.000133581	downregulated	-0.38525	0.769471		-0.667279	0.593409		0.620935	0.621486
ASPWEDRAFT_165554	-2.73646	2.68001e-05	downregulated	-2.37713	0.000107986	downregulated	-4.11944	1.53807e-10	downregulated	-4.15132	1.85539e-09	downregulated	0.133386	0.879782		1.25201	0.0660298		-0.249474	0.800396
ASPWEDRAFT_165588	-2.01495	0.000432672	downregulated	-1.59983	0.00386449	downregulated	-1.527	0.00469447	downregulated	-1.97711	0.000458639	downregulated	-0.754093	0.230208		1.52902	0.00597487	upregulated	-0.744162	0.251229
ASPWEDRAFT_166516	-2.1786	1.47317e-07	downregulated	-2.04585	4.27174e-07	downregulated	-1.60759	6.60774e-05	downregulated	-3.02448	5.60415e-14	downregulated	-1.47549	0.000503996	downregulated	-0.447046	0.33665		-1.80785	1.69912e-05	downregulated
ASPWEDRAFT_166893	-2.27089	8.02859e-22	downregulated	-3.33369	8.79818e-46	downregulated	-4.40689	5.39545e-71	downregulated	-1.65049	5.91331e-12	downregulated	-0.469046	0.101089		-1.2117	3.59526e-06	downregulated	0.591748	0.0322858
ASPWEDRAFT_166923	-2.78097	0.000469647	downregulated	-2.53084	0.00080842	downregulated	-2.33505	0.00162872	downregulated	-4.02712	2.63755e-07	downregulated	-2.32929	0.00939337	downregulated	0.655184	0.460728		-2.19748	0.0181963	downregulated
ASPWEDRAFT_166966	-4.87794	0.0128268	downregulated	-3.74891	0.0166864	downregulated	-4.301	0.00688353	downregulated	-3.37126	0.0415941	downregulated	-0.599517	0.832999		2.31465	0.255816		-1.21975	0.672937
ASPWEDRAFT_167430	-1.62799	0.000118324	downregulated	-2.23063	1.80989e-08	downregulated	-2.92296	2.91558e-14	downregulated	-1.07132	0.0142415	downregulated	0.06818	0.900688		0.0517042	0.926696		-0.185828	0.736861
ASPWEDRAFT_170178	-1.44662	0.000341135	downregulated	-2.11642	1.62944e-08	downregulated	-1.33789	0.000408106	downregulated	-1.12271	0.00605721	downregulated	-0.21667	0.647167		-0.983415	0.0130502		-0.190624	0.712679
ASPWEDRAFT_170563	-2.22507	2.59121e-08	downregulated	-2.03749	1.99416e-07	downregulated	-2.24647	4.27559e-09	downregulated	-2.52398	1.66774e-10	downregulated	-0.829678	0.0552219		-0.33844	0.468132		-0.591034	0.198912
ASPWEDRAFT_171353	-1.58662	0.0039381	downregulated	-1.37081	0.00576684	downregulated	-2.15205	2.10909e-05	downregulated	-1.13267	0.0338445	downregulated	-0.271255	0.709815		0.225562	0.743932		0.0165372	0.989304
ASPWEDRAFT_171669	-2.52156	7.96132e-16	downregulated	-1.96427	3.21675e-10	downregulated	-2.07652	1.29182e-11	downregulated	-2.20107	3.68797e-12	downregulated	-0.876779	0.0108323		0.327158	0.376444		-1.06486	0.00190427	downregulated
ASPWEDRAFT_171948	-1.53541	3.50134e-06	downregulated	-1.56994	8.03041e-07	downregulated	-1.68527	6.45381e-08	downregulated	-1.25134	0.000180916	downregulated	-0.267724	0.498744		-0.280385	0.465668		0.637052	0.0800405
ASPWEDRAFT_172725	-4.03336	0.00230262	downregulated	-3.69257	0.00106712	downregulated	-4.81623	0.000210919	downregulated	-3.30051	0.00569272	downregulated	-1.64893	0.435217		-2.88622	0.135537		0.589664	0.770816
ASPWEDRAFT_173245	-2.61244	6.80384e-10	downregulated	-2.14819	2.97544e-07	downregulated	-3.22334	1.43013e-15	downregulated	-1.13642	0.0134395	downregulated	-0.204037	0.703496		-0.700006	0.1305		0.564691	0.257601
ASPWEDRAFT_174337	-1.38507	0.00123781	downregulated	-1.75913	1.01195e-05	downregulated	-1.00673	0.0129536	downregulated	-3.42537	2.73109e-18	downregulated	-1.7332	2.44385e-05	downregulated	-0.271089	0.572324		-2.12529	1.85995e-07	downregulated
ASPWEDRAFT_174745	-1.46267	6.54167e-06	downregulated	-1.87929	9.92326e-10	downregulated	-1.89235	4.35425e-10	downregulated	-1.26043	0.000110916	downregulated	-0.144679	0.722053		0.558476	0.102965		0.165844	0.702559
ASPWEDRAFT_174847	-2.69886	8.60983e-07	downregulated	-1.70993	0.000706909	downregulated	-1.10781	0.0270633	downregulated	-2.49363	3.89038e-06	downregulated	0.390685	0.585641		1.68836	0.00267016	upregulated	0.644895	0.365001
ASPWEDRAFT_176165	-3.05183	5.35759e-09	downregulated	-2.95917	6.17578e-09	downregulated	-1.24268	0.017924	downregulated	-3.62484	2.7172e-12	downregulated	-1.26924	0.0296059	downregulated	1.46059	0.00679995	upregulated	-2.10852	0.000375194	downregulated
ASPWEDRAFT_176354	-3.03405	3.88578e-09	downregulated	-3.71517	1.46025e-13	downregulated	-1.29367	0.00889689	downregulated	-3.25034	3.35131e-10	downregulated	-1.14805	0.0775274		0.472918	0.449495		-0.137596	0.865646
ASPWEDRAFT_176799	-2.63271	0.0114837	downregulated	-4.61926	1.63427e-05	downregulated	-2.83439	0.00235975	downregulated	-5.78968	8.808e-05	downregulated	-2.17783	0.129941		0.547107	0.649861		-4.35656	0.0110239	downregulated
ASPWEDRAFT_176873	-2.72396	1.91814e-05	downregulated	-1.43933	0.0240447	downregulated	-2.65337	9.11294e-06	downregulated	-1.9888	0.00202405	downregulated	-0.18056	0.827188		0.400344	0.597808		0.0845654	0.928968
ASPWEDRAFT_177183	-3.03437	4.9308e-09	downregulated	-3.1119	7.05693e-10	downregulated	-2.91253	5.08549e-09	downregulated	-3.85898	4.2804e-14	downregulated	-1.58225	0.0043517	downregulated	0.683727	0.236892		-2.06955	0.000197445	downregulated
ASPWEDRAFT_179702	-3.27749	1.95944e-06	downregulated	-2.63792	5.05199e-06	downregulated	-3.6275	2.6495e-08	downregulated	-3.45338	8.60148e-07	downregulated	0.477578	0.624347		0.76828	0.371069		0.196184	0.873017
ASPWEDRAFT_179921	-1.89075	0.000142489	downregulated	-1.727	0.00011948	downregulated	-1.53488	0.000503949	downregulated	-1.98182	5.99529e-05	downregulated	-0.426466	0.538259		0.587864	0.305704		-1.54844	0.0533178
ASPWEDRAFT_180209	-1.54896	0.00204152	downregulated	-1.7366	0.000134003	downregulated	-1.96106	2.06346e-05	downregulated	-1.73503	0.000475359	downregulated	-0.835659	0.214904		-0.653653	0.297342		-1.25001	0.0992773
ASPWEDRAFT_181982	-2.29601	7.62889e-06	downregulated	-2.25998	3.48364e-06	downregulated	-2.22114	3.74097e-06	downregulated	-2.2504	9.95986e-06	downregulated	-0.359614	0.578272		-0.265152	0.682049		-0.209427	0.780477
ASPWEDRAFT_182669	-3.59514	7.38142e-06	downregulated	-1.76976	0.0126779	downregulated	-3.36211	3.16689e-06	downregulated	-2.96818	9.82534e-05	downregulated	0.369395	0.738824		0.250163	0.8238		0.861846	0.415163
ASPWEDRAFT_182969	-1.48653	9.73807e-50	downregulated	-1.16814	1.04114e-31	downregulated	-1.21741	7.30727e-35	downregulated	-1.42248	6.15553e-46	downregulated	0.363332	0.00122178		0.420003	9.81069e-05		0.271378	0.0211815
ASPWEDRAFT_183505	-1.55115	1.31266e-05	downregulated	-2.02146	1.93795e-09	downregulated	-1.24884	0.000107684	downregulated	-2.36734	3.54738e-10	downregulated	-1.32823	0.00630398	downregulated	-0.158918	0.744979		-0.729083	0.148761
ASPWEDRAFT_185092	-2.26652	4.32503e-06	downregulated	-1.33532	0.00257481	downregulated	-2.56333	3.02494e-08	downregulated	-1.08384	0.0226871	downregulated	-0.132271	0.859051		0.139567	0.84072		0.814335	0.18303
ASPWEDRAFT_185093	-5.90661	4.20725e-14	downregulated	-2.54086	0.00126546	downregulated	-3.56635	2.26248e-06	downregulated	-1.74913	0.0394495	downregulated	2.12615	0.0132294	upregulated	1.30697	0.138332		2.96503	0.000393231	upregulated
ASPWEDRAFT_186162	-4.51342	7.02755e-11	downregulated	-1.57696	0.0337205	downregulated	-2.36972	0.000635077	downregulated	-2.15312	0.00382011	downregulated	-1.29297	0.0932481		1.44739	0.0495929	upregulated	-0.590996	0.500128
ASPWEDRAFT_188294	-2.09667	0.00012641	downregulated	-3.40728	5.56835e-11	downregulated	-2.45302	1.39602e-06	downregulated	-3.64205	2.79422e-11	downregulated	-2.33699	0.000208885	downregulated	-1.55353	0.0077091	downregulated	-2.01324	0.00179089	downregulated
ASPWEDRAFT_189665	-1.21141	0.00270707	downregulated	-1.04598	0.00682667	downregulated	-1.68868	3.35839e-06	downregulated	-1.23743	0.00167735	downregulated	-0.107584	0.823966		0.615787	0.127362		-0.35107	0.445353
ASPWEDRAFT_25743	-6.80989	2.30967e-18	downregulated	-4.5584	1.86303e-09	downregulated	-6.14776	1.95238e-16	downregulated	-4.11096	1.60441e-07	downregulated	2.42314	0.00445837	upregulated	1.14664	0.203904		2.07957	0.0182783	upregulated
ASPWEDRAFT_267656	-2.37612	8.71215e-07	downregulated	-3.14721	7.61466e-12	downregulated	-1.68148	0.000342785	downregulated	-3.45882	1.14355e-13	downregulated	-1.24381	0.0136288	downregulated	-0.895964	0.0760534		-1.45523	0.00372263	downregulated
ASPWEDRAFT_26792	-2.23552	0.0168034	downregulated	-2.87066	0.000718739	downregulated	-3.6154	9.31376e-06	downregulated	-3.7186	1.40648e-05	downregulated	-1.77856	0.0495389	downregulated	0.17395	0.875059		-0.774718	0.452401
ASPWEDRAFT_269169	-1.38656	0.0105896	downregulated	-1.27571	0.0126266	downregulated	-2.27454	1.87901e-06	downregulated	-1.93586	0.000139941	downregulated	-0.834333	0.128498		0.245571	0.685785		-0.396217	0.523512
ASPWEDRAFT_27234	-1.21438	0.0114788	downregulated	-1.46663	0.000864993	downregulated	-3.03766	2.2166e-13	downregulated	-1.42672	0.00182171	downregulated	-0.663833	0.174821		-0.245763	0.643528		0.384551	0.475581
ASPWEDRAFT_27728	-3.68844	1.08404e-08	downregulated	-2.43771	0.000169129	downregulated	-4.01268	7.46314e-11	downregulated	-4.08646	1.67412e-10	downregulated	-0.676047	0.372836		1.00973	0.149871		-0.48554	0.555697
ASPWEDRAFT_28176	-1.95716	0.00559309	downregulated	-1.74933	0.00914589	downregulated	-2.3994	0.000163727	downregulated	-1.67967	0.0163265	downregulated	-0.863525	0.241344		0.993523	0.15782		-0.420293	0.616509
ASPWEDRAFT_28414	-2.33106	0.000989133	downregulated	-2.39295	0.00034753	downregulated	-3.01528	3.10277e-06	downregulated	-2.59277	0.000163824	downregulated	-1.57843	0.0305418	downregulated	0.28084	0.73892		-1.13206	0.141808
ASPWEDRAFT_29251	-1.18132	0.0294503	downregulated	-3.10246	2.18401e-11	downregulated	-3.24754	1.00967e-12	downregulated	-3.0353	1.62147e-10	downregulated	-3.17883	2.34533e-11	downregulated	-2.12043	7.73604e-06	downregulated	-2.27849	3.06419e-06	downregulated
ASPWEDRAFT_29799	-3.65226	2.05967e-13	downregulated	-1.51765	0.00361676	downregulated	-1.92579	0.00011401	downregulated	-1.28414	0.0197157	downregulated	0.110533	0.869714		1.46645	0.00492264	upregulated	0.322378	0.627118
ASPWEDRAFT_29880	-1.82833	0.00244361	downregulated	-1.98388	0.000450689	downregulated	-2.26584	3.45906e-05	downregulated	-2.78739	8.829e-07	downregulated	-0.325841	0.638027		0.729389	0.23997		-0.51577	0.455645
ASPWEDRAFT_30646	-4.52745	2.32324e-13	downregulated	-1.98215	0.00211483	downregulated	-1.99252	0.00149499	downregulated	-3.95184	2.82234e-10	downregulated	-0.377578	0.630843		1.90688	0.00309164	upregulated	-0.508696	0.526532
ASPWEDRAFT_30915	-1.88997	0.017744	downregulated	-3.89464	1.55331e-06	downregulated	-2.2322	0.00167644	downregulated	-4.77445	5.42263e-06	downregulated	-2.60372	0.0218648	downregulated	1.5816	0.0365547	upregulated	-4.14572	0.00865604	downregulated
ASPWEDRAFT_32364	-3.34357	4.39447e-14	downregulated	-2.62808	1.53094e-09	downregulated	-3.57668	7.11544e-17	downregulated	-3.41003	1.89345e-14	downregulated	-0.286604	0.623511		0.319775	0.56355		-0.137692	0.840641
ASPWEDRAFT_32402	-2.45166	1.11101e-06	downregulated	-2.12577	8.21092e-06	downregulated	-2.97324	5.25e-10	downregulated	-1.73439	0.000559368	downregulated	-0.213927	0.752785		0.044302	0.95358		-0.317315	0.662089
ASPWEDRAFT_33466	-6.87475	7.14859e-23	downregulated	-4.11654	4.0892e-12	downregulated	-5.80892	2.70667e-21	downregulated	-3.27254	1.00963e-07	downregulated	2.72439	0.000416858	upregulated	1.97935	0.0112625	upregulated	2.77103	0.000390814	upregulated
ASPWEDRAFT_34319	-4.91506	3.5951e-20	downregulated	-3.54301	1.24383e-11	downregulated	-3.13032	1.4275e-09	downregulated	-5.07481	6.12881e-21	downregulated	-2.31859	0.000838213	downregulated	-0.645799	0.331569		-2.08838	0.0035548	downregulated
ASPWEDRAFT_34330	-2.84277	0.00441275	downregulated	-2.46271	0.00972906	downregulated	-3.6789	4.28226e-05	downregulated	-4.07971	1.46669e-05	downregulated	-2.22044	0.0252413	downregulated	-0.0693954	0.958667		-1.73385	0.0944272
ASPWEDRAFT_35652	-2.06384	0.00407181	downregulated	-4.28623	2.37006e-11	downregulated	-3.97493	3.57733e-10	downregulated	-1.68474	0.0186712	downregulated	-0.499313	0.53229		-3.18202	1.22577e-06	downregulated	0.038191	0.971748
ASPWEDRAFT_37903	-7.07038	7.51325e-24	downregulated	-2.24693	0.00175566	downregulated	-2.90867	2.34179e-05	downregulated	-1.91111	0.0116378	downregulated	-1.34319	0.141997		0.590145	0.506325		-0.312162	0.777278
ASPWEDRAFT_37964	-3.71648	6.73183e-07	downregulated	-2.94099	4.82948e-05	downregulated	-3.12803	1.00201e-05	downregulated	-4.05034	5.59517e-08	downregulated	-2.07078	0.0206421	downregulated	0.0052153	0.997433		-1.80732	0.0512275
ASPWEDRAFT_38161	-1.22398	8.06132e-05	downregulated	-1.84553	1.93919e-10	downregulated	-2.31575	8.76026e-16	downregulated	-1.14525	0.000197428	downregulated	-0.690055	0.0403195		-1.08571	0.000617187	downregulated	0.534287	0.119172
ASPWEDRAFT_38245	-2.47592	8.30509e-08	downregulated	-1.33365	0.00459799	downregulated	-1.45528	0.0013782	downregulated	-1.13366	0.0225886	downregulated	-0.133426	0.822925		0.0197151	0.977702		0.00820059	0.994484
ASPWEDRAFT_38387	-1.25985	9.35424e-05	downregulated	-1.95668	6.73422e-11	downregulated	-2.90949	1.3808e-23	downregulated	-1.20832	0.000158077	downregulated	-1.08898	0.000670656	downregulated	-0.62688	0.0548055		-0.70038	0.038259
ASPWEDRAFT_38610	-1.4183	2.70503e-10	downregulated	-2.38902	7.95631e-28	downregulated	-1.79348	6.39843e-17	downregulated	-1.90713	2.42926e-17	downregulated	-0.830044	0.001188		-0.639974	0.00989583		-1.00246	0.000148472	downregulated
ASPWEDRAFT_38690	-3.25237	2.1151e-06	downregulated	-1.99028	0.00376522	downregulated	-2.30614	0.000492892	downregulated	-2.67577	0.000112955	downregulated	-0.819911	0.299082		1.05569	0.14956		-0.043195	0.968536
ASPWEDRAFT_39522	-1.41928	0.000651786	downregulated	-1.69815	1.22965e-05	downregulated	-1.12095	0.00388846	downregulated	-1.52826	0.000172698	downregulated	-1.39346	0.00172841	downregulated	-0.731298	0.0957006		-1.40623	0.00224984	downregulated
ASPWEDRAFT_39532	-3.66587	1.63539e-07	downregulated	-7.88512	2.932e-10	downregulated	-5.7738	6.33698e-13	downregulated	-9.28349	8.8102e-11	downregulated	-3.51221	0.0127189	downregulated	-2.7949	0.0105565	downregulated	-3.14532	0.0286177	downregulated
ASPWEDRAFT_39658	-3.07449	2.72126e-10	downregulated	-3.39478	3.79583e-13	downregulated	-3.82287	3.15355e-15	downregulated	-3.70358	5.46317e-13	downregulated	-1.82081	0.0145341	downregulated	-1.21084	0.0618638		-2.47662	0.00709759	downregulated
ASPWEDRAFT_39687	-2.90068	6.00796e-27	downregulated	-1.21369	3.23516e-06	downregulated	-1.19193	3.46216e-06	downregulated	-1.60371	1.85954e-09	downregulated	1.31714	8.34341e-06	upregulated	2.05453	7.16481e-14	upregulated	0.475867	0.172726
ASPWEDRAFT_39768	-4.74408	1.03883e-24	downregulated	-3.14855	6.35486e-12	downregulated	-3.20328	1.24931e-12	downregulated	-1.93656	7.16607e-05	downregulated	0.801687	0.142577		-0.310919	0.603801		1.12384	0.0353733	upregulated
ASPWEDRAFT_39876	-1.02249	0.0387855	downregulated	-2.60095	6.03591e-10	downregulated	-2.88356	2.40113e-12	downregulated	-2.20946	4.11863e-07	downregulated	-2.09524	1.57038e-06	downregulated	-0.284947	0.581713		-1.7799	6.17167e-05	downregulated
ASPWEDRAFT_406664	-1.64159	0.00031419	downregulated	-1.49679	0.000636233	downregulated	-1.87409	8.59534e-06	downregulated	-2.04594	3.26205e-06	downregulated	-1.04977	0.0230695	downregulated	0.288574	0.57716		-1.15113	0.0131161	downregulated
ASPWEDRAFT_41058	-3.08423	8.40918e-11	downregulated	-1.49479	0.00217746	downregulated	-2.06048	9.47068e-06	downregulated	-2.12959	1.31123e-05	downregulated	0.505919	0.372739		1.62927	0.000807997	upregulated	1.20872	0.0204381	upregulated
ASPWEDRAFT_41164	-1.59781	0.000745616	downregulated	-1.79533	5.59837e-05	downregulated	-2.20481	3.35386e-07	downregulated	-1.42631	0.00245017	downregulated	-0.415735	0.434311		-0.925867	0.0507416		0.134448	0.835216
ASPWEDRAFT_41303	-1.82513	5.78596e-07	downregulated	-1.15281	0.00170627	downregulated	-2.27762	3.41321e-11	downregulated	-1.22138	0.00125373	downregulated	0.000148556	0.999894		0.230029	0.596395		0.61571	0.130536
ASPWEDRAFT_41342	-3.14358	2.38001e-22	downregulated	-3.29584	3.50705e-25	downregulated	-2.84866	1.71735e-19	downregulated	-1.95928	3.59537e-09	downregulated	-1.38318	0.000178299	downregulated	-0.946137	0.00879955		-1.6895	8.25428e-06	downregulated
ASPWEDRAFT_41578	-1.86037	8.81048e-07	downregulated	-2.37808	4.9558e-11	downregulated	-2.90484	7.42234e-15	downregulated	-1.15651	0.00225723	downregulated	0.366869	0.435853		-0.122566	0.813523		0.723992	0.103762
ASPWEDRAFT_41754	-1.04895	0.00625467	downregulated	-1.79455	1.90151e-07	downregulated	-1.83302	5.69367e-08	downregulated	-1.41023	9.72997e-05	downregulated	-1.09462	0.00276385	downregulated	-0.362884	0.363332		-0.771605	0.0443446
ASPWEDRAFT_42026	-1.96451	1.38337e-06	downregulated	-1.17055	0.00437601	downregulated	-1.13741	0.00443964	downregulated	-1.35764	0.00122184	downregulated	0.335659	0.484112		0.638339	0.141578		0.513227	0.274548
ASPWEDRAFT_42449	-1.25378	1.3076e-06	downregulated	-1.67188	1.1044e-11	downregulated	-2.07988	9.80859e-18	downregulated	-1.01089	0.000117365	downregulated	-0.811096	0.00330558		-0.997121	0.000160221		0.00722381	0.989589
ASPWEDRAFT_43352	-1.92277	0.000622673	downregulated	-1.41281	0.00418827	downregulated	-1.59367	0.00115511	downregulated	-2.50966	2.02629e-05	downregulated	0.723096	0.279064		0.663122	0.302175		-0.133883	0.889157
ASPWEDRAFT_435722	-3.26894	5.91759e-14	downregulated	-1.76981	4.48356e-05	downregulated	-1.99095	2.5084e-06	downregulated	-1.12135	0.0169629	downregulated	-0.74311	0.165029		-0.435152	0.419979		0.161291	0.808145
ASPWEDRAFT_43573	-4.66127	8.26334e-17	downregulated	-1.29852	0.0281237	downregulated	-1.53044	0.00650512	downregulated	-1.32117	0.0306924	downregulated	-0.0413241	0.960991		1.16868	0.0589411		-0.0683106	0.940519
ASPWEDRAFT_43935	-1.99944	4.43641e-10	downregulated	-1.86813	8.89846e-10	downregulated	-2.66095	1.40141e-17	downregulated	-1.9255	1.74109e-09	downregulated	-0.493746	0.231165		0.0235975	0.963381		-0.573271	0.183901
ASPWEDRAFT_43970	-2.91014	2.091e-08	downregulated	-3.29355	5.39848e-11	downregulated	-3.16334	1.69105e-10	downregulated	-4.39479	9.4202e-18	downregulated	-1.6701	0.00270898	downregulated	0.888648	0.112042		-1.65856	0.00345428	downregulated
ASPWEDRAFT_44901	-1.45801	0.0439429	downregulated	-2.43433	0.000169343	downregulated	-1.89717	0.00265661	downregulated	-3.72494	8.9029e-07	downregulated	-2.26715	0.00694476	downregulated	-0.212689	0.801545		-0.463055	0.603347
ASPWEDRAFT_44919	-2.3337	0.00115228	downregulated	-3.80689	7.05803e-09	downregulated	-4.88524	2.49892e-14	downregulated	-5.62572	2.42926e-17	downregulated	-1.84373	0.00983318	downregulated	-1.19152	0.0988843		-1.2033	0.112836
ASPWEDRAFT_45222	-1.85804	1.47642e-23	downregulated	-2.20971	6.32729e-34	downregulated	-2.3438	2.75021e-38	downregulated	-1.72276	3.74389e-20	downregulated	-0.235008	0.311414		-0.193888	0.39638		0.0495003	0.86391
ASPWEDRAFT_45235	-3.58807	1.01587e-05	downregulated	-2.49469	0.000175214	downregulated	-1.49991	0.018603	downregulated	-2.1906	0.00191687	downregulated	0.883265	0.399884		0.887481	0.373279		0.00534007	0.99978
ASPWEDRAFT_45268	-1.96822	2.81052e-07	downregulated	-1.58476	2.69429e-05	downregulated	-1.8194	7.26078e-07	downregulated	-1.12696	0.00528371	downregulated	-0.229561	0.625606		-0.182885	0.699198		0.430753	0.344347
ASPWEDRAFT_45287	-6.19968	1.65077e-07	downregulated	-2.34665	0.00214581	downregulated	-3.26287	1.76596e-05	downregulated	-2.95074	0.000257359	downregulated	2.5961	0.0532011		2.68506	0.0365547	upregulated	0.606795	0.770022
ASPWEDRAFT_45303	-2.09575	6.9473e-13	downregulated	-1.52138	1.89258e-07	downregulated	-2.10879	8.34726e-14	downregulated	-1.63248	4.55191e-08	downregulated	-0.155922	0.676722		-0.478028	0.143131		0.868988	0.00624461
ASPWEDRAFT_45377	-2.61563	1.54642e-06	downregulated	-3.3708	1.89343e-10	downregulated	-4.84525	9.00533e-15	downregulated	-3.3482	2.94432e-09	downregulated	-5.17988	0.000353832	downregulated	-2.4515	0.00140126	downregulated	-1.36944	0.0795045
ASPWEDRAFT_45677	-3.45437	1.05978e-35	downregulated	-2.18158	4.89875e-17	downregulated	-2.552	6.83561e-23	downregulated	-1.08469	9.18329e-05	downregulated	1.49816	9.51618e-07	upregulated	0.727914	0.0232783		1.68629	3.22676e-08	upregulated
ASPWEDRAFT_45835	-2.51887	1.14475e-10	downregulated	-2.23349	7.05803e-09	downregulated	-1.67296	1.40514e-05	downregulated	-2.75474	1.26281e-12	downregulated	-1.176	0.00461972	downregulated	-0.801793	0.0548046		-0.629543	0.162957
ASPWEDRAFT_45893	-1.11386	2.59547e-05	downregulated	-2.17556	9.15096e-19	downregulated	-2.69047	2.18105e-28	downregulated	-1.30537	4.73506e-07	downregulated	-0.760027	0.00558722		-0.43642	0.118209		-0.630098	0.026522
ASPWEDRAFT_46612	-2.54727	2.12783e-09	downregulated	-2.57992	5.20883e-10	downregulated	-2.59563	2.11804e-10	downregulated	-2.24713	1.80843e-07	downregulated	-0.550788	0.262516		-0.667661	0.152102		-0.614299	0.216173
ASPWEDRAFT_46712	-1.85842	0.00543428	downregulated	-1.28363	0.0492387	downregulated	-1.74534	0.00438868	downregulated	-3.20513	2.38489e-07	downregulated	-1.6616	0.01107	downregulated	-0.359	0.630131		-1.98881	0.0023672	downregulated
ASPWEDRAFT_46883	-2.91495	2.53452e-08	downregulated	-2.45981	8.17791e-07	downregulated	-1.17032	0.0201438	downregulated	-1.18404	0.0293842	downregulated	0.436279	0.507307		-0.590244	0.359769		-0.0380201	0.966587
ASPWEDRAFT_471532	-1.38257	2.28402e-06	downregulated	-2.31381	3.91375e-17	downregulated	-2.37263	2.34207e-18	downregulated	-1.16863	7.59611e-05	downregulated	0.254873	0.456828		-0.221679	0.515168		0.632655	0.0447343
ASPWEDRAFT_48184	-1.66864	0.000105644	downregulated	-2.38363	3.03712e-09	downregulated	-2.05472	2.53206e-07	downregulated	-3.14245	6.53365e-15	downregulated	-1.65919	8.46504e-05	downregulated	-0.851662	0.0497255		-2.64714	1.16318e-10	downregulated
ASPWEDRAFT_489058	-1.39744	0.0136509	downregulated	-1.97064	0.000117193	downregulated	-2.28947	3.8305e-06	downregulated	-3.79333	3.24457e-14	downregulated	-1.52039	0.00441728	downregulated	1.35732	0.00965444	upregulated	-2.23324	1.88681e-05	downregulated
ASPWEDRAFT_50075	-2.63055	0.00024458	downregulated	-1.49809	0.0129351	downregulated	-2.0855	0.000598595	downregulated	-2.12063	0.00155989	downregulated	-0.147509	0.895707		0.504997	0.57996		0.333933	0.770964
ASPWEDRAFT_50277	-1.69797	4.2854e-12	downregulated	-2.13	3.50594e-19	downregulated	-2.22411	2.6931e-21	downregulated	-2.55052	2.13627e-26	downregulated	-1.17871	3.43626e-06	downregulated	-0.114822	0.713605		-2.01113	3.17207e-16	downregulated
ASPWEDRAFT_51185	-2.36189	1.04756e-09	downregulated	-2.55434	5.31505e-12	downregulated	-1.68856	2.87568e-06	downregulated	-1.52775	7.26568e-05	downregulated	-0.119798	0.829934		0.0122504	0.984846		-0.0624874	0.923105
ASPWEDRAFT_52117	-1.18943	0.00282052	downregulated	-1.50879	4.078e-05	downregulated	-3.26445	1.45298e-20	downregulated	-2.34023	1.89463e-10	downregulated	-1.71248	6.73888e-06	downregulated	-1.29565	0.00056298	downregulated	-1.03717	0.00926284	downregulated
ASPWEDRAFT_52853	-4.10645	1.0649e-07	downregulated	-2.41606	1.13572e-05	downregulated	-2.6673	1.91179e-06	downregulated	-3.15053	1.18427e-06	downregulated	1.37491	0.152308		-0.0524832	0.971508		1.35899	0.180817
ASPWEDRAFT_52914	-1.1978	0.00734546	downregulated	-1.00159	0.0188302	downregulated	-1.219	0.00267011	downregulated	-1.33206	0.00191945	downregulated	-1.02659	0.0189382	downregulated	-0.0645731	0.90628		-0.455936	0.35375
ASPWEDRAFT_53567	-2.95192	3.95234e-17	downregulated	-1.88942	9.13391e-08	downregulated	-3.64963	7.75041e-27	downregulated	-2.62876	1.19049e-13	downregulated	-0.524836	0.207397		-0.431098	0.293988		-0.0432223	0.938343
ASPWEDRAFT_538219	-2.13699	2.1203e-07	downregulated	-1.21692	0.00367221	downregulated	-1.0401	0.0114959	downregulated	-1.37836	0.00130741	downregulated	-1.01064	0.0205498	downregulated	-0.771252	0.0758494		-0.820211	0.070447
ASPWEDRAFT_543025	-2.98222	9.55398e-09	downregulated	-2.05842	3.78641e-05	downregulated	-2.79615	1.23628e-08	downregulated	-2.37593	4.53637e-06	downregulated	-0.721901	0.274684		-0.459971	0.482313		-0.441221	0.54753
ASPWEDRAFT_54492	-1.65614	0.000330076	downregulated	-3.06812	4.54836e-13	downregulated	-1.39674	0.00130337	downregulated	-3.03879	2.44038e-12	downregulated	-1.2074	0.00993291	downregulated	-0.183864	0.740394		-1.32218	0.00510937	downregulated
ASPWEDRAFT_54767	-1.16181	0.0387855	downregulated	-1.97815	8.92505e-05	downregulated	-1.97492	8.0905e-05	downregulated	-1.166	0.029376	downregulated	0.280215	0.665863		-1.24738	0.0421162	downregulated	0.0751448	0.925358
ASPWEDRAFT_554566	-2.14914	3.61511e-06	downregulated	-3.40778	5.59044e-15	downregulated	-2.01085	5.24777e-06	downregulated	-2.29105	5.97199e-07	downregulated	-1.07558	0.0270653	downregulated	-1.37223	0.00306152	downregulated	-0.636407	0.227187
ASPWEDRAFT_556501	-1.83297	2.47872e-07	downregulated	-2.23629	5.46981e-11	downregulated	-2.60474	5.44716e-15	downregulated	-1.55736	1.51862e-05	downregulated	-0.542804	0.169412		-0.405286	0.305506		-0.261335	0.560002
ASPWEDRAFT_588928	-1.33825	0.00011306	downregulated	-2.36351	3.17008e-13	downregulated	-3.24177	8.88564e-23	downregulated	-1.30403	0.000143651	downregulated	-0.784979	0.0365395		-1.1132	0.0017193	downregulated	0.378835	0.35397
ASPWEDRAFT_59204	-2.05888	0.00479998	downregulated	-3.51582	3.73008e-07	downregulated	-2.91886	1.25968e-05	downregulated	-1.62602	0.0236339	downregulated	-1.261	0.135185		-2.72916	0.00181899	downregulated	0.098844	0.924778
ASPWEDRAFT_611006	-1.26294	0.000135793	downregulated	-1.51671	1.19623e-06	downregulated	-2.67391	3.82052e-19	downregulated	-1.6351	3.1944e-07	downregulated	-0.180005	0.645779		-0.490546	0.154931		0.54448	0.128309
ASPWEDRAFT_61393	-2.03063	5.97933e-09	downregulated	-2.70485	7.47647e-16	downregulated	-2.35482	1.46141e-12	downregulated	-2.06758	2.9219e-09	downregulated	0.123446	0.781154		1.01423	0.00458758	upregulated	0.297713	0.497025
ASPWEDRAFT_619445	-1.46843	1.03817e-05	downregulated	-1.03637	0.00168675	downregulated	-1.01894	0.00153763	downregulated	-1.15949	0.000603549	downregulated	0.0748232	0.861889		0.931381	0.00500595		0.340272	0.388042
ASPWEDRAFT_62551	-2.48689	1.0515e-12	downregulated	-2.80153	1.70841e-16	downregulated	-1.64539	1.16279e-06	downregulated	-2.81475	1.17235e-15	downregulated	-1.14913	0.00491235	downregulated	-0.454814	0.274596		-0.83083	0.0525103
ASPWEDRAFT_62807	-2.89469	0.00011164	downregulated	-2.35839	0.0010071	downregulated	-2.10192	0.00282234	downregulated	-3.77417	3.8533e-07	downregulated	-1.66405	0.0541917		0.36137	0.689954		-1.00851	0.271653
ASPWEDRAFT_63277	-2.68948	2.75854e-10	downregulated	-2.93308	1.53958e-12	downregulated	-1.99029	1.6945e-06	downregulated	-3.93487	9.03652e-21	downregulated	-1.8256	5.76369e-05	downregulated	-0.149892	0.786838		-1.80821	8.93865e-05	downregulated
ASPWEDRAFT_644130	-2.35401	9.63199e-12	downregulated	-1.43212	4.47279e-05	downregulated	-1.72251	4.0767e-07	downregulated	-1.08188	0.00374326	downregulated	0.19134	0.660275		0.218195	0.607955		0.940609	0.0123931
ASPWEDRAFT_64736	-2.9874	1.23116e-06	downregulated	-1.34667	0.0346646	downregulated	-1.52761	0.0118565	downregulated	-6.23359	5.92756e-23	downregulated	-1.25547	0.062735		1.61189	0.00986707	upregulated	-3.167	4.70369e-06	downregulated
ASPWEDRAFT_67270	-2.16901	0.00143711	downregulated	-3.48073	5.32259e-08	downregulated	-2.54123	4.58859e-05	downregulated	-4.10946	2.67163e-09	downregulated	-2.05595	0.00769206	downregulated	-0.00513436	0.997433		-2.26657	0.00576858	downregulated
ASPWEDRAFT_68738	-1.4649	0.0122749	downregulated	-4.16559	7.17062e-16	downregulated	-4.42552	5.98541e-18	downregulated	-4.25185	1.3963e-15	downregulated	-3.03097	5.0784e-08	downregulated	-1.99145	0.000226862	downregulated	-2.81608	5.83136e-07	downregulated
ASPWEDRAFT_696065	-1.15766	0.00785895	downregulated	-1.1695	0.00392161	downregulated	-1.19143	0.0025078	downregulated	-1.48415	0.000334284	downregulated	-1.93918	6.69027e-06	downregulated	-1.07737	0.0104783	downregulated	-1.54376	0.000442675	downregulated
ASPWEDRAFT_73120	-1.54675	9.21652e-05	downregulated	-1.12472	0.00348875	downregulated	-1.90939	1.93791e-07	downregulated	-1.50904	0.000117593	downregulated	-0.11936	0.812104		-0.274573	0.552058		0.116889	0.835172
ASPWEDRAFT_745309	-4.37986	5.17893e-05	downregulated	-2.35809	0.0245619	downregulated	-2.91123	0.00366393	downregulated	-3.77574	0.000387411	downregulated	-2.6936	0.0787814		1.80285	0.112022		-1.90202	0.210657
ASPWEDRAFT_103382	-1.86288	2.6636e-15	downregulated	-1.15514	1.09754e-06	downregulated	-1.13288	1.18607e-06	downregulated	-0.961317	0.000110757		0.730352	0.00433161		1.53102	6.90448e-11	upregulated	0.321088	0.265292
ASPWEDRAFT_108547	-2.04366	5.98229e-05	downregulated	-1.63658	0.000355581	downregulated	-1.31183	0.00349324	downregulated	-0.186222	0.747131		0.687769	0.257576		-0.720244	0.272602		1.292	0.0220366	upregulated
ASPWEDRAFT_113157	-1.29379	0.0153746	downregulated	-2.47766	1.46504e-07	downregulated	-2.09576	7.09918e-06	downregulated	-0.926361	0.0834423		0.0944471	0.881296		-0.123216	0.842793		-0.183809	0.784835
ASPWEDRAFT_114890	-1.29509	1.96298e-07	downregulated	-1.19813	8.03041e-07	downregulated	-1.42739	1.53031e-09	downregulated	-0.714628	0.00661422		0.32295	0.253535		0.919447	0.000204554		0.336608	0.243235
ASPWEDRAFT_115640	-1.43556	0.015114	downregulated	-1.14318	0.0424496	downregulated	-1.0976	0.0433393	downregulated	0.695186	0.260585		0.966528	0.098264		0.088189	0.901255		1.24428	0.0311932	upregulated
ASPWEDRAFT_115904	-2.19148	8.61555e-10	downregulated	-1.67421	2.39162e-06	downregulated	-1.69165	1.21907e-06	downregulated	-0.647391	0.108683		0.761803	0.0507169		0.0687014	0.886261		1.02009	0.00779196	upregulated
ASPWEDRAFT_117531	-1.11932	0.000360725	downregulated	-1.59993	4.05974e-08	downregulated	-2.20882	1.03007e-14	downregulated	-0.844083	0.00785075		-1.15335	0.000302894	downregulated	-1.52668	6.01821e-07	downregulated	-0.513321	0.140871
ASPWEDRAFT_118038	-2.44669	1.31266e-05	downregulated	-1.117	0.0329456	downregulated	-1.2412	0.0138501	downregulated	-0.845248	0.13385		-0.331454	0.673625		-1.17116	0.106045		-1.04166	0.212461
ASPWEDRAFT_118157	-1.18378	0.00236066	downregulated	-1.30578	0.000337625	downregulated	-2.71319	2.5096e-15	downregulated	-0.416015	0.332969		0.367867	0.386901		-0.577496	0.14125		0.743248	0.0622992
ASPWEDRAFT_118735	-1.3777	4.79734e-07	downregulated	-1.06888	6.94191e-05	downregulated	-1.16969	7.97324e-06	downregulated	-0.32824	0.299541		-0.506404	0.0949564		-0.736528	0.00949303		-0.1889	0.594533
ASPWEDRAFT_120490	-2.00015	0.00557499	downregulated	-1.91533	0.00482078	downregulated	-1.55321	0.0204221	downregulated	-0.247589	0.779487		-0.876188	0.247119		-1.3987	0.0452776	downregulated	-0.194149	0.838803
ASPWEDRAFT_122767	-2.97932	0.00039654	downregulated	-2.71481	0.000689611	downregulated	-1.88601	0.0177847	downregulated	-0.452734	0.65389		2.33389	0.00532994	upregulated	1.56127	0.0654061		2.77261	0.000844727	upregulated
ASPWEDRAFT_131073	-1.7937	4.2478e-07	downregulated	-1.49127	1.62095e-05	downregulated	-1.88092	2.19382e-08	downregulated	0.661777	0.0861427		-0.0298167	0.952654		-1.53671	2.56891e-05	downregulated	0.854625	0.0259337
ASPWEDRAFT_136910	-2.57378	0.00102879	downregulated	-1.93381	0.00952486	downregulated	-3.17629	1.13197e-05	downregulated	-1.26578	0.116975		0.110105	0.915699		1.58164	0.0424099	upregulated	0.350724	0.737734
ASPWEDRAFT_151547	-2.67675	0.0160903	downregulated	-3.56351	0.00143441	downregulated	-1.66427	0.0364784	downregulated	-0.293406	0.750285		2.41214	0.0294239	upregulated	0.569608	0.692129		2.92033	0.00749659	upregulated
ASPWEDRAFT_158487	-3.42212	3.68355e-06	downregulated	-3.329	1.28052e-06	downregulated	-2.4965	0.000175118	downregulated	-0.942825	0.212996		1.25541	0.136927		-0.575397	0.560181		1.23298	0.158261
ASPWEDRAFT_158633	-1.76407	0.000520407	downregulated	-1.47754	0.00110854	downregulated	-1.93414	2.73391e-05	downregulated	-0.714744	0.149535		-0.565345	0.420617		-0.576718	0.380234		0.376892	0.596833
ASPWEDRAFT_163175	-3.43727	1.30345e-07	downregulated	-1.4081	0.0114318	downregulated	-2.07331	0.00014371	downregulated	-0.715967	0.248207		1.97565	0.00529098	upregulated	1.05288	0.164512		1.76914	0.0174295	upregulated
ASPWEDRAFT_163198	-1.32925	0.000622673	downregulated	-1.07733	0.00421433	downregulated	-1.60516	6.78101e-06	downregulated	-0.529916	0.210447		-0.609759	0.137374		-0.636683	0.107319		0.340355	0.452092
ASPWEDRAFT_164167	-3.39823	5.46349e-09	downregulated	-1.70359	0.00456167	downregulated	-1.2782	0.0320424	downregulated	-0.355489	0.635358		1.57089	0.0108931	upregulated	0.972646	0.122657		2.03978	0.000781488	upregulated
ASPWEDRAFT_167562	-1.83082	0.000349157	downregulated	-1.62901	0.000407097	downregulated	-2.36745	9.0485e-07	downregulated	0.142411	0.804114		-0.191944	0.790107		-1.71022	0.0145465	downregulated	-0.061634	0.944412
ASPWEDRAFT_168811	-1.56884	0.000553942	downregulated	-1.39181	0.00141723	downregulated	-1.362	0.00137672	downregulated	-0.0110951	0.988334		1.19953	0.00802244	upregulated	-0.00309747	0.997433		1.40709	0.001775	upregulated
ASPWEDRAFT_169203	-1.3936	0.011072	downregulated	-1.38557	0.00473565	downregulated	-1.26581	0.00849591	downregulated	0.215613	0.716168		-0.306664	0.664673		-0.311109	0.647373		0.68012	0.283661
ASPWEDRAFT_170074	-1.18836	0.00422766	downregulated	-2.27722	1.40825e-09	downregulated	-1.76224	2.24548e-06	downregulated	-0.252199	0.599791		0.186681	0.70088		-0.58946	0.16765		1.25229	0.00190427	upregulated
ASPWEDRAFT_171295	-1.82957	0.000143782	downregulated	-1.00019	0.0354925	downregulated	-1.49872	0.000851659	downregulated	0.0607413	0.927591		0.417838	0.458585		-0.263923	0.65337		0.985577	0.0575911
ASPWEDRAFT_171513	-2.36967	1.03007e-11	downregulated	-1.68323	2.85304e-07	downregulated	-1.22497	0.000163141	downregulated	-0.716715	0.0475858		0.922359	0.0201565		0.584073	0.150054		1.70731	4.59266e-06	upregulated
ASPWEDRAFT_172166	-3.37202	1.78091e-22	downregulated	-1.13947	0.000957994	downregulated	-1.90282	7.92442e-09	downregulated	-0.384391	0.342687		-0.996945	0.0240055		-1.15899	0.00580893	downregulated	-0.403132	0.414175
ASPWEDRAFT_172922	-2.82309	4.99927e-39	downregulated	-1.00641	7.55387e-06	downregulated	-1.63735	2.82337e-14	downregulated	-0.0249629	0.941948		1.26383	4.16817e-08	upregulated	0.336408	0.183869		1.81552	5.4705e-16	upregulated
ASPWEDRAFT_174316	-1.95565	1.91642e-07	downregulated	-1.66376	6.41676e-06	downregulated	-1.43973	7.96762e-05	downregulated	-0.120169	0.811437		0.823105	0.0398954		0.287748	0.512755		1.58724	3.09748e-05	upregulated
ASPWEDRAFT_175305	-1.51916	1.5694e-12	downregulated	-1.57069	9.93018e-14	downregulated	-1.75122	2.66315e-17	downregulated	-0.414248	0.0908646		-0.0930858	0.737192		-0.362537	0.127342		0.73914	0.00128821
ASPWEDRAFT_176365	-1.28336	0.0124541	downregulated	-1.34156	0.00302135	downregulated	-1.33251	0.00288867	downregulated	-0.348954	0.501814		0.327533	0.605693		-0.702374	0.263818		0.3647	0.595466
ASPWEDRAFT_176367	-4.01365	0.000873487	downregulated	-2.5868	0.00554813	downregulated	-3.38047	0.000536037	downregulated	-1.91713	0.0515485		0.502156	0.767215		0.488363	0.769193		0.883648	0.608419
ASPWEDRAFT_176916	-1.40096	0.000590142	downregulated	-1.18227	0.00147098	downregulated	-1.47645	6.3334e-05	downregulated	-0.851668	0.0342425		-1.20528	0.0228147	downregulated	-0.60707	0.214496		-0.146137	0.821675
ASPWEDRAFT_177609	-3.04951	9.8555e-12	downregulated	-1.17494	0.00249607	downregulated	-1.09249	0.00413223	downregulated	-0.366406	0.420635		0.632271	0.283351		-0.458463	0.481228		1.1997	0.0280009	upregulated
ASPWEDRAFT_177909	-2.67633	1.69902e-07	downregulated	-2.06825	1.50763e-06	downregulated	-1.57953	0.000136596	downregulated	-0.128767	0.806474		0.962855	0.127174		1.24016	0.0295543	upregulated	1.27893	0.0395381	upregulated
ASPWEDRAFT_178656	-1.3745	0.00250631	downregulated	-1.61035	0.000141634	downregulated	-2.23023	4.06722e-08	downregulated	-0.327389	0.532158		0.802895	0.0816593		-0.427646	0.376336		1.54601	0.000399249	upregulated
ASPWEDRAFT_186153	-1.30504	0.0162963	downregulated	-1.30475	0.00976459	downregulated	-1.29659	0.00801778	downregulated	-0.758587	0.173095		0.304402	0.612826		-0.233163	0.701563		1.06648	0.0458195	upregulated
ASPWEDRAFT_203938	-1.75148	0.000865037	downregulated	-1.33022	0.00739312	downregulated	-1.26964	0.00876828	downregulated	-0.927155	0.0843542		-0.49828	0.43252		0.0532874	0.942072		1.19214	0.0305566	upregulated
ASPWEDRAFT_242389	-1.46218	0.00645461	downregulated	-1.5244	0.00140272	downregulated	-1.29115	0.00560483	downregulated	-0.98713	0.0549433		0.0651195	0.932999		-0.0162815	0.984691		0.862455	0.158817
ASPWEDRAFT_24393	-1.08046	0.0264686	downregulated	-1.08057	0.0146603	downregulated	-1.54428	0.000302025	downregulated	-0.316918	0.546088		-0.877975	0.0916525		-2.04235	6.77766e-05	downregulated	0.0225543	0.977107
ASPWEDRAFT_27172	-3.45633	6.06327e-14	downregulated	-1.12526	0.0233341	downregulated	-1.18818	0.0125148	downregulated	-0.504649	0.372557		1.42577	0.00395599	upregulated	1.22211	0.0122605	upregulated	1.90704	8.90491e-05	upregulated
ASPWEDRAFT_29219	-1.15606	9.27194e-06	downregulated	-1.45973	3.74008e-09	downregulated	-1.72419	8.88789e-13	downregulated	-0.422403	0.142935		-0.703236	0.00857378		-0.938824	0.000224881		-0.131492	0.69882
ASPWEDRAFT_30521	-2.55196	1.46311e-08	downregulated	-1.08516	0.0126965	downregulated	-2.05294	9.15407e-07	downregulated	-0.630391	0.189765		1.20356	0.0152285	upregulated	0.457246	0.403029		1.44345	0.00346015	upregulated
ASPWEDRAFT_30624	-2.94475	6.6909e-17	downregulated	-1.34941	0.000198848	downregulated	-2.72741	1.86092e-15	downregulated	-0.765578	0.0547609		0.268476	0.54719		0.244662	0.578058		1.00295	0.0104867	upregulated
ASPWEDRAFT_32065	-2.2561	4.93171e-16	downregulated	-1.17733	3.37546e-05	downregulated	-1.60458	4.48806e-09	downregulated	-0.132899	0.724508		0.0525544	0.89164		-0.124675	0.732334		0.564349	0.0786008
ASPWEDRAFT_33462	-5.59676	2.2297e-17	downregulated	-2.59376	1.36443e-05	downregulated	-2.3639	5.70368e-05	downregulated	-0.73966	0.290905		4.01058	4.49205e-09	upregulated	2.66806	0.000120798	upregulated	4.14143	1.35471e-09	upregulated
ASPWEDRAFT_34135	-1.27826	0.000768965	downregulated	-1.21381	0.000563883	downregulated	-1.32604	0.000128533	downregulated	0.00628704	0.992553		0.840975	0.0338597		0.752069	0.0519104		2.22226	4.4983e-10	upregulated
ASPWEDRAFT_34668	-3.27514	1.01955e-05	downregulated	-1.96227	0.00768553	downregulated	-1.46495	0.0445228	downregulated	0.510972	0.566232		1.82425	0.0181755	upregulated	-0.0851647	0.934262		2.18758	0.00432982	upregulated
ASPWEDRAFT_34701	-1.04959	0.00524497	downregulated	-1.42125	3.52151e-05	downregulated	-1.05325	0.00210557	downregulated	-0.0561095	0.910975		-0.134641	0.760799		-0.657058	0.077504		0.405582	0.328059
ASPWEDRAFT_37951	-3.03134	1.03697e-25	downregulated	-1.38737	2.27434e-08	downregulated	-1.49018	1.39509e-09	downregulated	-0.693502	0.0101842		0.492323	0.206334		0.833648	0.0142634		1.61406	9.74177e-07	upregulated
ASPWEDRAFT_38547	-3.96629	5.07026e-15	downregulated	-2.48706	1.30303e-06	downregulated	-2.33947	3.79508e-06	downregulated	-0.372254	0.570808		0.252731	0.698717		-0.878148	0.118526		1.39677	0.0122409	upregulated
ASPWEDRAFT_39571	-1.59371	0.000402505	downregulated	-1.01168	0.0190791	downregulated	-1.96409	2.21349e-06	downregulated	-0.777974	0.0934516		0.0534504	0.931975		-0.44684	0.394891		0.0370399	0.958274
ASPWEDRAFT_39585	-1.87094	0.000267923	downregulated	-1.02209	0.0372904	downregulated	-1.72153	0.00024667	downregulated	-0.511875	0.354351		1.96304	9.94533e-05	upregulated	1.12896	0.0304559	upregulated	2.14799	2.12956e-05	upregulated
ASPWEDRAFT_39746	-1.25082	6.14292e-05	downregulated	-1.1599	6.90519e-05	downregulated	-2.00138	1.06499e-11	downregulated	-0.899577	0.00401617		0.0846554	0.839886		-0.621912	0.0774112		0.59988	0.0913833
ASPWEDRAFT_39931	-1.85974	5.51761e-10	downregulated	-1.37961	3.34345e-06	downregulated	-1.71831	2.64468e-09	downregulated	-0.506426	0.136033		0.475839	0.163262		0.541966	0.0956969		1.08453	0.000590692	upregulated
ASPWEDRAFT_41103	-1.40131	6.76822e-06	downregulated	-1.05773	0.000566074	downregulated	-1.37859	2.87929e-06	downregulated	-0.541601	0.112337		0.252577	0.487774		-0.36497	0.283754		0.723536	0.0282834
ASPWEDRAFT_41688	-2.84035	2.67879e-14	downregulated	-1.92005	2.70415e-07	downregulated	-3.73027	5.92335e-25	downregulated	-0.888355	0.0316836		-0.0118337	0.982694		-0.972298	0.0170326		0.732031	0.0903136
ASPWEDRAFT_41689	-1.77643	4.04521e-07	downregulated	-1.13548	0.000935935	downregulated	-1.60097	1.39058e-06	downregulated	0.00921884	0.987618		0.685595	0.0768223		-0.0232258	0.965152		1.15981	0.00175341	upregulated
ASPWEDRAFT_41768	-1.74508	0.000107668	downregulated	-1.16363	0.00918994	downregulated	-1.02396	0.0189358	downregulated	-0.665525	0.177843		-0.411728	0.423577		-0.489619	0.317843		-0.162595	0.79096
ASPWEDRAFT_42441	-1.09482	0.0026691	downregulated	-1.63764	8.68706e-07	downregulated	-1.49494	5.27773e-06	downregulated	-0.808253	0.0280913		0.375131	0.340255		-0.283477	0.473098		0.84277	0.0206197
ASPWEDRAFT_42451	-1.25276	3.90661e-07	downregulated	-1.7429	1.25068e-13	downregulated	-1.87355	9.20571e-16	downregulated	-0.640632	0.0135123		-0.162399	0.602951		-0.518188	0.0548046		0.29815	0.323466
ASPWEDRAFT_43536	-1.04021	0.0340997	downregulated	-1.80498	2.77772e-05	downregulated	-2.79209	2.93584e-11	downregulated	-0.950486	0.0449205		0.652976	0.179952		-0.75651	0.108099		1.23494	0.00715025	upregulated
ASPWEDRAFT_43586	-2.41693	1.59762e-05	downregulated	-1.5389	0.0046556	downregulated	-3.2128	1.43363e-09	downregulated	-0.427922	0.510221		0.0702599	0.929396		0.127266	0.864185		0.710123	0.283959
ASPWEDRAFT_43927	-1.74867	0.045209	downregulated	-2.26455	0.00378444	downregulated	-1.71254	0.0232405	downregulated	-1.13274	0.177171		1.25352	0.151472		1.76285	0.0275231	upregulated	0.950678	0.319318
ASPWEDRAFT_44845	-2.83511	5.23838e-15	downregulated	-1.23101	0.000165252	downregulated	-1.49176	3.35839e-06	downregulated	-0.322048	0.406237		-0.078173	0.893548		0.471206	0.303506		1.0099	0.0224388	upregulated
ASPWEDRAFT_46957	-2.56633	1.724e-12	downregulated	-1.02404	0.00331387	downregulated	-1.4845	1.03984e-05	downregulated	-0.514977	0.187264		0.284653	0.561882		0.575438	0.179854		1.02016	0.0164998	upregulated
ASPWEDRAFT_472050	-1.78497	1.45039e-05	downregulated	-1.72356	1.11512e-05	downregulated	-1.37301	0.000414602	downregulated	-0.235381	0.63818		1.03035	0.0170865	upregulated	0.860862	0.0433266		1.52862	0.000262438	upregulated
ASPWEDRAFT_49006	-1.37023	0.000379094	downregulated	-1.36528	0.000202339	downregulated	-1.77416	5.25621e-07	downregulated	-0.0758178	0.885517		-0.00646817	0.990312		-0.521134	0.193		0.59281	0.153201
ASPWEDRAFT_52028	-3.57293	1.51273e-14	downregulated	-1.21406	0.0131216	downregulated	-1.6667	0.000324739	downregulated	-0.0769993	0.910702		0.792971	0.141701		1.26307	0.010793	upregulated	1.36442	0.00786495	upregulated
ASPWEDRAFT_53463	-2.32057	2.86663e-09	downregulated	-1.09575	0.00387189	downregulated	-1.45075	7.55033e-05	downregulated	-0.218615	0.643195		0.402416	0.413243		0.657044	0.137354		1.83746	6.91404e-06	upregulated
ASPWEDRAFT_700754	-1.501	0.00101777	downregulated	-1.82379	1.78341e-05	downregulated	-2.01207	1.45405e-06	downregulated	-0.442577	0.382797		-0.112988	0.845842		-0.859435	0.0719344		0.096139	0.881157
ASPWEDRAFT_713709	-1.12562	0.00295501	downregulated	-1.44651	3.47561e-05	downregulated	-1.2834	0.000198764	downregulated	-0.550745	0.169471		0.714775	0.0598026		0.273456	0.507772		1.16136	0.00152385	upregulated
ASPWEDRAFT_72680	-3.20482	1.01587e-05	downregulated	-1.44454	0.0305553	downregulated	-1.44077	0.0255451	downregulated	-0.0251642	0.980333		0.515558	0.583219		0.248212	0.801829		-0.429556	0.713291
ASPWEDRAFT_731540	-4.49766	0.0268232	downregulated	-4.97849	0.00736376	downregulated	-3.86322	0.0354214	downregulated	-1.61664	NA		2.7009	NA		4.94644	0.00738343	upregulated	1.56332	0.577197
ASPWEDRAFT_99333	-1.55587	3.00981e-06	downregulated	-1.26404	0.000101383	downregulated	-1.544	9.91392e-07	downregulated	-0.91609	0.00849025		-0.255647	0.523269		0.398371	0.27764		-0.181192	0.682538
ASPWEDRAFT_101582	-1.38457	0.000276224	downregulated	-1.00934	0.00695005	downregulated	-0.668891	0.0743286		-1.4231	0.000143634	downregulated	-1.05668	0.00563336	downregulated	0.229753	0.598706		-1.57259	2.54179e-05	downregulated
ASPWEDRAFT_119639	-1.42768	0.00527531	downregulated	-1.04426	0.0357506	downregulated	-0.903534	0.0620991		-2.23889	2.68959e-06	downregulated	-0.754485	0.150389		0.576179	0.270609		-0.359197	0.546899
ASPWEDRAFT_162056	-1.74445	0.0021582	downregulated	-1.17388	0.0267168	downregulated	0.13428	0.826174		-1.4922	0.00730667	downregulated	1.05335	0.0779204		2.10021	7.09718e-05	upregulated	1.11629	0.0677367
ASPWEDRAFT_164108	-3.90875	0.000117371	downregulated	-2.40388	0.00828083	downregulated	-1.6708	0.0622518		-4.27186	3.42496e-05	downregulated	-1.18244	0.423736		-0.629648	0.650252		-1.25366	0.443711
ASPWEDRAFT_166271	-1.7734	6.22844e-05	downregulated	-1.17485	0.00704718	downregulated	-0.184686	0.714556		-1.01388	0.0277206	downregulated	-1.09132	0.0210989	downregulated	-0.857055	0.0646279		-1.14505	0.0180497	downregulated
ASPWEDRAFT_167716	-1.84977	1.10814e-05	downregulated	-1.45388	0.000435648	downregulated	-0.886643	0.0338314		-1.755	2.92144e-05	downregulated	-0.877103	0.0485375		0.985806	0.0203755		-0.833984	0.0671098
ASPWEDRAFT_170983	-1.52084	0.00698241	downregulated	-1.52353	0.00348265	downregulated	-0.938681	0.0722297		-3.99496	2.1055e-11	downregulated	0.553804	0.369499		3.0623	6.42732e-10	upregulated	-1.69796	0.00875614	downregulated
ASPWEDRAFT_171474	-3.89904	0.00113144	downregulated	-2.80362	0.00276011	downregulated	-1.68531	0.0561897		-2.63438	0.00901929	downregulated	1.4414	0.310968		1.6318	0.215658		1.15838	0.466869
ASPWEDRAFT_173968	-1.92168	0.00107759	downregulated	-1.40459	0.0111815	downregulated	-0.994593	0.0691677		-1.60321	0.00568255	downregulated	-0.680585	0.34097		-0.810656	0.227507		-1.63754	0.0319777	downregulated
ASPWEDRAFT_174830	-1.48225	8.20173e-06	downregulated	-1.07072	0.00112486	downregulated	-0.385326	0.271295		-1.49926	5.34838e-06	downregulated	-1.56282	2.14017e-06	downregulated	-0.364735	0.319009		-0.992232	0.00393565
ASPWEDRAFT_177601	-1.18586	0.00315758	downregulated	-1.81018	7.8546e-07	downregulated	-0.625094	0.104653		-2.69999	5.63526e-13	downregulated	-2.69746	3.41015e-11	downregulated	-1.4687	0.00013973	downregulated	-2.95849	4.47079e-12	downregulated
ASPWEDRAFT_177602	-1.02257	0.0079737	downregulated	-2.00066	6.43681e-09	downregulated	-0.37517	0.325771		-2.32906	4.96062e-11	downregulated	-2.93569	4.54865e-14	downregulated	-1.61103	8.27115e-06	downregulated	-2.67719	1.15263e-11	downregulated
ASPWEDRAFT_177783	-2.2173	3.99895e-14	downregulated	-1.05149	0.000519423	downregulated	-0.469173	0.13681		-2.45177	6.76152e-17	downregulated	0.587334	0.0751437		1.50592	3.40621e-07	upregulated	-1.25512	7.79687e-05	downregulated
ASPWEDRAFT_183430	-1.95009	3.98998e-07	downregulated	-1.86129	6.68515e-07	downregulated	-0.956215	0.012661		-1.48757	0.000152926	downregulated	-0.433848	0.326406		1.30081	0.000689585	upregulated	-0.737634	0.081602
ASPWEDRAFT_184130	-1.13769	0.00476237	downregulated	-1.35371	0.000221282	downregulated	-0.833599	0.0218		-1.43765	0.000236509	downregulated	-0.430542	0.373493		-0.798513	0.0705321		-1.14083	0.0226373	downregulated
ASPWEDRAFT_188194	-3.60341	1.27236e-20	downregulated	-2.80839	2.08114e-15	downregulated	-0.221202	0.583421		-3.68813	6.12881e-21	downregulated	0.46078	0.37888		1.4985	0.000378766	upregulated	-0.58582	0.338058
ASPWEDRAFT_241504	-2.40186	2.38659e-06	downregulated	-2.50222	3.51815e-07	downregulated	-0.95656	0.0636584		-3.7897	8.12164e-15	downregulated	-0.991476	0.0678486		-0.339864	0.568509		-1.5493	0.00325251	downregulated
ASPWEDRAFT_251224	-2.37168	6.46993e-07	downregulated	-1.0059	0.0322909	downregulated	-0.668257	0.153578		-1.82152	0.000120735	downregulated	0.292461	0.63533		-0.0419026	0.953977		-0.0413232	0.958573
ASPWEDRAFT_29011	-1.75152	1.02461e-16	downregulated	-1.05709	5.24611e-08	downregulated	-0.657784	0.00068195		-1.64143	5.56889e-15	downregulated	-0.157157	0.614713		0.572943	0.0178214		-0.998753	0.00141397
ASPWEDRAFT_29065	-1.00951	0.0383879	downregulated	-3.07225	1.16446e-12	downregulated	-0.441822	0.33976		-3.05895	1.46922e-11	downregulated	-1.38811	0.00359772	downregulated	0.961671	0.0314298		-0.710975	0.16509
ASPWEDRAFT_33834	-1.275	0.000674352	downregulated	-1.48247	2.57199e-05	downregulated	-0.739661	0.041167		-1.51845	2.83821e-05	downregulated	-0.67666	0.0803663		0.321304	0.43241		-0.407057	0.335475
ASPWEDRAFT_34320	-3.79888	7.91946e-14	downregulated	-1.78169	0.000737213	downregulated	-0.806343	0.142171		-2.11801	8.04395e-05	downregulated	-1.12563	0.0469737	downregulated	0.684136	0.237351		-0.215915	0.766361
ASPWEDRAFT_385072	-1.50228	0.00088209	downregulated	-2.16515	2.25762e-07	downregulated	-0.371099	0.431326		-1.69879	0.000110757	downregulated	-2.30153	5.28185e-07	downregulated	-1.6624	0.000166902	downregulated	-1.77809	0.000136999	downregulated
ASPWEDRAFT_38630	-1.4775	0.00389438	downregulated	-1.23128	0.00933542	downregulated	-0.505563	0.30177		-1.18116	0.018802	downregulated	-0.720733	0.233649		-1.04223	0.0655178		0.203673	0.774788
ASPWEDRAFT_41181	-2.06661	5.26793e-05	downregulated	-1.15706	0.0149737	downregulated	-0.889448	0.0570646		-1.23935	0.0136971	downregulated	0.519875	0.405237		0.78262	0.163459		0.778696	0.204058
ASPWEDRAFT_41484	-2.02741	0.000198764	downregulated	-1.50898	0.00137734	downregulated	-0.856116	0.0625842		-1.12894	0.0262893	downregulated	0.797415	0.219542		-0.995597	0.18397		0.604102	0.409574
ASPWEDRAFT_643503	-3.21262	8.16083e-13	downregulated	-1.54937	0.000293583	downregulated	-0.99241	0.0205706		-1.89017	1.96401e-05	downregulated	-0.195879	0.762244		0.670936	0.204373		-0.265734	0.708055
ASPWEDRAFT_663625	-2.02086	0.00304078	downregulated	-1.53454	0.0168951	downregulated	-0.700739	0.28796		-3.0169	8.24944e-06	downregulated	-0.941798	0.23714		0.73092	0.314508		-1.036	0.216452
ASPWEDRAFT_70540	-2.80037	2.80944e-06	downregulated	-1.32668	0.0233602	downregulated	-0.647887	0.279701		-3.67643	2.20109e-09	downregulated	-0.44668	0.568045		0.972991	0.135537		-1.27757	0.11111
ASPWEDRAFT_73146	-4.78228	1.27255e-06	downregulated	-1.26845	0.0435199	downregulated	-0.509986	0.431663		-3.05777	2.35909e-05	downregulated	2.77743	0.00980451	upregulated	4.35761	6.5881e-06	upregulated	0.569023	0.739538
ASPWEDRAFT_739023	-4.23698	0.00372875	downregulated	-2.01852	0.0251182	downregulated	-1.48847	0.0839846		-2.24882	0.0251609	downregulated	1.6426	0.348545		2.3709	0.120869		-0.296009	0.915062
ASPWEDRAFT_747785	-1.11382	9.5165e-06	downregulated	-1.37169	8.61718e-09	downregulated	0.908156	0.000117022		-1.62331	2.85337e-11	downregulated	-0.231319	0.436544		1.64129	3.19211e-12	upregulated	0.272796	0.364931
ASPWEDRAFT_116118	-1.34953	0.00403584	downregulated	-1.45668	0.000888875	downregulated	-0.957895	0.0297416		-0.552982	0.275323		-0.115899	0.83626		0.936987	0.0385024		0.0758155	0.90604
ASPWEDRAFT_118605	-1.64764	0.000208003	downregulated	-1.4349	0.000691728	downregulated	-0.673814	0.121073		0.227934	0.670568		0.673759	0.163282		0.368052	0.465711		1.2772	0.00494526	upregulated
ASPWEDRAFT_133403	-2.27282	9.91801e-13	downregulated	-1.13201	0.00023554	downregulated	-0.780237	0.0111063		0.0266868	0.953457		0.221625	0.605321		-0.0309538	0.950654		0.682329	0.0769144
ASPWEDRAFT_168587	-2.09473	4.09292e-05	downregulated	-1.08668	0.0202007	downregulated	-0.106122	0.845796		-0.829251	0.100338		0.593554	0.341048		1.9252	0.000116935	upregulated	0.119205	0.885834
ASPWEDRAFT_171473	-4.06143	0.0108275	downregulated	-2.70979	0.0155589	downregulated	-0.934094	0.37449		-2.07989	0.0761754		2.06986	0.239729		2.56599	0.110986		1.1889	0.58533
ASPWEDRAFT_176368	-5.01842	0.00318716	downregulated	-2.26134	0.0341523	downregulated	-1.74239	0.0873007		-1.31009	0.24794		1.67659	0.43596		1.83974	0.355885		1.49481	0.539955
ASPWEDRAFT_177715	-2.56287	5.7086e-07	downregulated	-1.23609	0.0166878	downregulated	0.0187493	0.978085		0.550982	0.346934		1.63166	0.00211091	upregulated	0.574899	0.322339		1.52706	0.00486154	upregulated
ASPWEDRAFT_178019	-1.77789	0.0203346	downregulated	-2.47602	0.000466713	downregulated	-0.240714	0.742072		-0.883312	0.228392		0.551706	0.540803		0.869937	0.278248		0.0246695	0.987978
ASPWEDRAFT_185845	-3.3951	0.045129	downregulated	-3.92363	0.0113447	downregulated	-1.81286	0.123246		-3.43356	NA		1.98354	NA		-0.943699	0.696202		0.552537	0.835112
ASPWEDRAFT_23262	-1.8147	1.89044e-06	downregulated	-1.54455	3.38777e-05	downregulated	-0.850199	0.0252945		-0.746732	0.0725354		-1.45483	0.000160184	downregulated	-1.35235	0.000335838	downregulated	-0.892206	0.0284361
ASPWEDRAFT_25686	-1.97889	0.000132958	downregulated	-1.11422	0.0314278	downregulated	-0.11959	0.845374		0.331674	0.591186		1.2623	0.0173509	upregulated	0.738673	0.175898		1.46909	0.00550824	upregulated
ASPWEDRAFT_28060	-1.54935	3.40226e-05	downregulated	-1.20581	0.00100947	downregulated	-0.401759	0.308806		-0.31744	0.474536		0.785156	0.0434653		-0.107697	0.817491		0.629794	0.121331
ASPWEDRAFT_305901	-1.68494	1.1197e-05	downregulated	-2.24581	6.44886e-10	downregulated	-0.888385	0.0164104		-0.786509	0.052076		-1.14715	0.00716091	downregulated	-1.3663	0.00081475	downregulated	-0.0577954	0.92108
ASPWEDRAFT_39389	-1.01234	0.0346441	downregulated	-1.29446	0.0026345	downregulated	-0.345691	0.466692		0.157218	0.780401		0.598495	0.207693		-0.200714	0.700836		1.08529	0.0162614	upregulated
ASPWEDRAFT_40644	-1.29649	2.05888e-05	downregulated	-1.45248	5.69399e-07	downregulated	-0.552775	0.0694721		-0.937823	0.00260537		0.266384	0.448867		1.00644	0.000736548	upregulated	0.378859	0.276359
ASPWEDRAFT_41136	-2.05722	3.6126e-09	downregulated	-1.13076	0.000676377	downregulated	-0.238201	0.518996		0.0806839	0.859687		1.04756	0.00610102	upregulated	0.110394	0.81956		0.807179	0.0479701
ASPWEDRAFT_41302	-1.20503	0.00218696	downregulated	-1.43586	8.53779e-05	downregulated	-0.650285	0.0860936		-0.307867	0.49301		-0.33504	0.443627		-0.324984	0.44775		0.754852	0.0621636
ASPWEDRAFT_44707	-1.21758	0.019153	downregulated	-1.41585	0.0023501	downregulated	-0.141693	0.789654		-0.776716	0.127264		-0.509991	0.415477		-1.79923	0.00334578	downregulated	-0.65506	0.325926
ASPWEDRAFT_60083	-1.69708	3.40775e-09	downregulated	-1.36617	1.09589e-06	downregulated	-0.593844	0.0401479		-0.690985	0.0250751		0.521625	0.107961		-0.0177505	0.967544		0.868222	0.00526395
ASPWEDRAFT_683704	-1.43039	0.0444798	downregulated	-1.35037	0.0322909	downregulated	-0.0313732	0.966707		-0.369979	0.617735		1.23342	0.0765726		1.87738	0.00297439	upregulated	2.03051	0.00205565	upregulated
ASPWEDRAFT_692626	-1.00665	3.26193e-05	downregulated	-1.12194	8.68049e-07	downregulated	-0.443656	0.0597137		-0.540812	0.0316438		-0.223927	0.445049		0.146185	0.617081		0.21108	0.491908
ASPWEDRAFT_119580	-1.22311	0.0372169	downregulated	1.42866	0.00416858	upregulated	-1.20587	0.0189514	downregulated	1.24382	0.0183935	upregulated	0.976423	0.0888393		0.160935	0.814737		1.34934	0.0163915	upregulated
ASPWEDRAFT_110065	-1.18729	0.0190608	downregulated	1.65102	0.000262878	upregulated	3.27059	1.44269e-14	upregulated	-1.70533	0.000288746	downregulated	0.286767	0.60668		3.24026	6.89275e-14	upregulated	-0.415276	0.461595
ASPWEDRAFT_166414	-1.447	0.013352	downregulated	2.79193	4.81841e-08	upregulated	3.39687	8.12449e-12	upregulated	-3.13907	4.53921e-09	downregulated	1.30245	0.020476	upregulated	3.46706	7.29674e-12	upregulated	-1.13047	0.0577875
ASPWEDRAFT_171355	-1.46849	0.00903781	downregulated	3.42537	1.61035e-12	upregulated	4.51657	1.05687e-21	upregulated	-1.76156	0.00105383	downregulated	2.72457	9.24108e-08	upregulated	4.95962	6.1596e-25	upregulated	-0.703698	0.253609
ASPWEDRAFT_28731	-1.05245	0.0453275	downregulated	2.6653	7.71744e-11	upregulated	3.73883	4.08695e-21	upregulated	-1.6785	0.000736433	downregulated	2.26298	7.64694e-07	upregulated	4.03243	2.33798e-21	upregulated	-0.646553	0.296054
ASPWEDRAFT_31198	-4.23234	0.007079	downregulated	1.62092	0.0108827	upregulated	2.01628	0.000820375	upregulated	-2.01616	0.046983	downregulated	3.14389	0.0550687		2.62463	0.111108		0.601521	0.827157
ASPWEDRAFT_60227	-1.21148	0.0113395	downregulated	2.24258	7.48111e-08	upregulated	3.66478	4.59029e-20	upregulated	-1.28218	0.00549365	downregulated	1.02281	0.0277673	upregulated	4.08926	1.01606e-23	upregulated	0.122727	0.845392
ASPWEDRAFT_71331	-2.1798	0.000534689	downregulated	1.2027	0.0451671	upregulated	2.64952	1.16962e-06	upregulated	-1.7035	0.00644421	downregulated	2.74305	5.31974e-06	upregulated	4.2052	1.21492e-13	upregulated	0.919023	0.193409
ASPWEDRAFT_104449	-1.5486	1.44428e-05	downregulated	1.15275	0.000569195	upregulated	1.89761	1.90429e-09	upregulated	1.29027	0.000163824	upregulated	1.07841	0.00344163	upregulated	2.06652	8.10328e-10	upregulated	0.964419	0.0114017
ASPWEDRAFT_106284	-1.30574	0.0358378	downregulated	3.18408	7.34038e-12	upregulated	2.27551	1.21552e-06	upregulated	2.40089	9.45698e-07	upregulated	1.74709	0.00229886	upregulated	2.66497	4.37561e-07	upregulated	1.20023	0.0548813
ASPWEDRAFT_108862	-1.2414	0.0495014	downregulated	1.58601	0.00169407	upregulated	2.28386	1.80909e-06	upregulated	1.50597	0.0045018	upregulated	0.104983	0.895032		0.492534	0.46009		-0.0174152	0.989304
ASPWEDRAFT_110472	-1.54242	0.0499476	downregulated	2.18129	0.00169284	upregulated	1.70995	0.0128972	upregulated	2.5064	0.000403648	upregulated	-0.130286	0.885232		0.0603405	0.950703		0.340173	0.7118
ASPWEDRAFT_114563	-1.54191	0.00330259	downregulated	3.18164	3.51595e-14	upregulated	1.12466	0.0116622	upregulated	1.85185	4.26359e-05	upregulated	1.5073	0.00344163	upregulated	1.48734	0.00287684	upregulated	1.49366	0.00461174	upregulated
ASPWEDRAFT_114673	-1.45885	0.00186628	downregulated	1.09845	0.0151459	upregulated	1.96507	2.84293e-06	upregulated	1.66118	0.000205569	upregulated	1.67948	0.000180272	upregulated	1.20997	0.0070535	upregulated	1.33641	0.00385946	upregulated
ASPWEDRAFT_116288	-1.56004	0.000139851	downregulated	2.07414	1.62049e-09	upregulated	1.02235	0.00416937	upregulated	2.15046	9.75268e-10	upregulated	2.55737	3.14559e-11	upregulated	2.14702	1.85708e-08	upregulated	2.71473	1.91245e-12	upregulated
ASPWEDRAFT_122846	-1.17345	0.0426726	downregulated	2.46372	3.35835e-07	upregulated	1.58898	0.00113817	upregulated	1.59414	0.0021217	upregulated	0.161058	0.807776		0.709752	0.203579		0.529253	0.396093
ASPWEDRAFT_162051	-1.0779	0.005044	downregulated	1.25534	0.000121276	upregulated	2.19901	8.61595e-13	upregulated	1.34278	6.72605e-05	upregulated	0.812105	0.0375731		0.225221	0.613881		0.71303	0.0832339
ASPWEDRAFT_165515	-2.33836	0.0484902	downregulated	2.4269	0.00139336	upregulated	1.6889	0.0278495	upregulated	1.66795	0.0455089	upregulated	0.224206	0.891425		1.59536	0.174612		0.858741	0.573358
ASPWEDRAFT_169626	-1.27218	0.00106045	downregulated	1.57427	5.61085e-07	upregulated	1.45609	2.88728e-06	upregulated	1.6371	4.39017e-07	upregulated	1.46365	0.000120782	upregulated	1.25608	0.000797168	upregulated	1.67536	1.09679e-05	upregulated
ASPWEDRAFT_171396	-1.8089	0.0437188	downregulated	1.1862	0.033036	upregulated	1.3556	0.0104129	upregulated	2.11257	7.26421e-05	upregulated	1.98853	0.0208279	upregulated	1.76069	0.036873	upregulated	2.11138	0.0164309	upregulated
ASPWEDRAFT_175955	-1.34764	0.000955783	downregulated	2.48636	1.3883e-12	upregulated	1.85631	1.30371e-07	upregulated	1.42002	0.000172698	upregulated	1.65265	2.4697e-05	upregulated	2.41408	5.5385e-11	upregulated	1.59056	6.42763e-05	upregulated
ASPWEDRAFT_178498	-2.10919	0.0225935	downregulated	2.61439	2.69559e-06	upregulated	2.86608	1.35639e-07	upregulated	2.48367	1.98773e-05	upregulated	3.42455	3.5494e-05	upregulated	3.44032	1.76877e-05	upregulated	1.91099	0.0462569	upregulated
ASPWEDRAFT_22970	-2.08568	0.00534424	downregulated	1.86666	0.00018457	upregulated	1.43786	0.00420341	upregulated	1.98804	0.000117354	upregulated	2.3685	0.00107408	upregulated	2.68879	8.65476e-05	upregulated	3.41841	7.54463e-07	upregulated
ASPWEDRAFT_25248	-1.68977	1.98686e-05	downregulated	1.6416	6.13527e-06	upregulated	1.29031	0.000372064	upregulated	1.70965	4.63831e-06	upregulated	0.916682	0.0288408		1.46252	0.000159291	upregulated	1.30522	0.0014423	upregulated
ASPWEDRAFT_32030	-1.11381	0.028906	downregulated	2.18956	6.41063e-08	upregulated	3.63578	4.93522e-21	upregulated	1.6165	0.000171896	upregulated	0.831587	0.103104		2.4773	1.02355e-08	upregulated	0.195514	0.773069
ASPWEDRAFT_341690	-1.06513	0.00675376	downregulated	2.53513	3.24722e-14	upregulated	3.07968	3.92751e-21	upregulated	2.50416	1.96568e-13	upregulated	0.747356	0.0578261		1.29062	0.000358609	upregulated	0.543329	0.198628
ASPWEDRAFT_342466	-1.34245	0.000402522	downregulated	1.47735	3.76395e-07	upregulated	1.47964	2.41218e-07	upregulated	1.48544	8.69453e-07	upregulated	2.16266	1.41326e-09	upregulated	2.38474	2.8904e-12	upregulated	2.4828	2.45361e-12	upregulated
ASPWEDRAFT_40122	-1.47426	0.000124961	downregulated	2.13568	4.08426e-10	upregulated	1.43678	3.07661e-05	upregulated	2.46811	8.80538e-13	upregulated	1.09929	0.00492579	upregulated	0.921163	0.0169171		1.3736	0.00038464	upregulated
ASPWEDRAFT_43058	-1.38442	0.00313364	downregulated	2.78871	1.31616e-12	upregulated	1.9109	1.42151e-06	upregulated	1.82506	1.27164e-05	upregulated	1.37614	0.00257963	upregulated	2.48924	2.65156e-09	upregulated	1.12542	0.0185589	upregulated
ASPWEDRAFT_437081	-4.44951	8.4133e-05	downregulated	1.76352	0.00283781	upregulated	1.27617	0.0314405	upregulated	2.40681	4.86108e-05	upregulated	2.76369	0.0232361	upregulated	2.76227	0.018318	upregulated	3.9916	0.000531862	upregulated
ASPWEDRAFT_45722	-2.55438	0.000742418	downregulated	2.94203	5.54791e-12	upregulated	1.75114	7.42713e-05	upregulated	2.68655	1.31993e-09	upregulated	1.48485	0.0816593		0.575089	0.559017		1.2759	0.172991
ASPWEDRAFT_48910	-1.69222	6.01493e-05	downregulated	3.12902	5.90996e-16	upregulated	1.77928	5.8653e-06	upregulated	2.43773	1.2309e-09	upregulated	-0.740303	0.099915		0.857565	0.0442947		-1.79718	2.3046e-05	downregulated
ASPWEDRAFT_50947	-1.68703	0.000187355	downregulated	2.33876	9.25636e-09	upregulated	1.36188	0.00102218	upregulated	2.17779	2.22904e-07	upregulated	2.18319	4.75723e-07	upregulated	2.62833	2.61805e-10	upregulated	2.29854	1.13271e-07	upregulated
ASPWEDRAFT_55161	-1.27845	1.23519e-05	downregulated	2.10001	2.48778e-18	upregulated	1.57797	6.96407e-11	upregulated	2.31445	2.64203e-21	upregulated	1.86327	4.04468e-11	upregulated	0.98697	0.000812354		1.54139	1.55818e-07	upregulated
ASPWEDRAFT_60143	-1.77468	0.0232693	downregulated	2.46939	4.10546e-06	upregulated	3.24456	3.21816e-10	upregulated	2.55079	4.02516e-06	upregulated	2.33844	0.0012842	upregulated	4.4631	5.85351e-12	upregulated	1.07735	0.223807
ASPWEDRAFT_65022	-2.17028	0.000212523	downregulated	3.38777	5.5294e-14	upregulated	2.45928	5.55843e-08	upregulated	2.63801	2.08173e-08	upregulated	1.08006	0.0972931		0.427662	0.552743		1.41912	0.0270737	upregulated
ASPWEDRAFT_667243	-1.726	0.00033389	downregulated	1.72347	1.24081e-05	upregulated	2.55096	1.24811e-11	upregulated	1.14511	0.00776543	upregulated	3.29204	1.0312e-13	upregulated	4.47091	3.50393e-26	upregulated	1.77315	0.000269925	upregulated
ASPWEDRAFT_72229	-1.64189	0.0394068	downregulated	4.39681	4.30375e-22	upregulated	2.39912	4.08051e-07	upregulated	3.73859	2.21632e-15	upregulated	2.04273	0.00623134	upregulated	2.72703	6.53393e-05	upregulated	2.67188	0.000227254	upregulated
ASPWEDRAFT_101654	-2.72196	1.88996e-13	downregulated	1.57404	3.25072e-06	upregulated	2.23502	6.40942e-12	upregulated	-0.591337	0.135787		2.48494	4.69068e-11	upregulated	4.50482	5.44585e-37	upregulated	0.544148	0.257555
ASPWEDRAFT_115158	-1.21273	0.00460697	downregulated	1.26516	0.000874574	upregulated	1.96555	4.73837e-08	upregulated	0.244306	0.61392		1.62345	5.62466e-05	upregulated	2.81323	5.25937e-14	upregulated	-0.165521	0.779163
ASPWEDRAFT_118028	-1.04428	0.00279202	downregulated	4.22926	8.79818e-46	upregulated	5.0219	2.61965e-65	upregulated	0.470479	0.20341		2.8263	1.54502e-19	upregulated	5.12597	4.28306e-66	upregulated	-0.188462	0.663636
ASPWEDRAFT_126305	-1.99385	7.17191e-05	downregulated	1.7893	1.41451e-05	upregulated	1.54501	0.000159862	upregulated	0.276202	0.611169		1.77935	0.000477854	upregulated	1.99594	3.91695e-05	upregulated	0.580992	0.366979
ASPWEDRAFT_138615	-4.26334	0.000197471	downregulated	2.23866	0.000142412	upregulated	2.12188	0.000247052	upregulated	-0.0826868	0.929327		0.247933	0.896348		0.970024	0.514727		2.19032	0.103906
ASPWEDRAFT_151531	-3.37107	0.00127222	downregulated	4.15856	5.38817e-09	upregulated	6.45548	4.59121e-21	upregulated	0.589241	0.526261		5.39355	2.70065e-08	upregulated	6.72306	4.47256e-13	upregulated	2.16586	0.0577977
ASPWEDRAFT_156490	-1.22382	0.00522746	downregulated	1.00306	0.0146649	upregulated	2.69321	4.81524e-13	upregulated	0.296034	0.549132		1.75838	1.68113e-05	upregulated	3.19664	5.14768e-17	upregulated	0.442079	0.370156
ASPWEDRAFT_166557	-1.48389	0.00301385	downregulated	2.17663	1.65214e-07	upregulated	2.70417	1.88111e-11	upregulated	0.761009	0.116142		3.01437	2.59716e-11	upregulated	4.15746	5.13901e-22	upregulated	1.25988	0.0139137	upregulated
ASPWEDRAFT_166704	-1.03828	0.000538252	downregulated	1.29077	1.55331e-06	upregulated	1.50691	8.14608e-09	upregulated	0.66385	0.0263104		1.33675	3.55342e-06	upregulated	2.16517	9.23656e-16	upregulated	1.29846	8.88374e-06	upregulated
ASPWEDRAFT_168559	-1.46333	4.90652e-07	downregulated	1.11251	1.58614e-05	upregulated	2.15937	4.941e-19	upregulated	0.345459	0.264888		0.789083	0.0133122		2.49323	3.55433e-20	upregulated	0.374594	0.315241
ASPWEDRAFT_168649	-2.99831	0.0093655	downregulated	2.20295	0.0016505	upregulated	2.27428	0.000834721	upregulated	0.537822	0.548006		2.27806	0.0547326		1.51729	0.220966		2.03807	0.107831
ASPWEDRAFT_171934	-1.1551	0.0207801	downregulated	1.78209	2.57421e-05	upregulated	2.01003	1.0607e-06	upregulated	0.0929971	0.881738		2.28605	2.85693e-07	upregulated	3.19549	3.83637e-14	upregulated	0.141386	0.833748
ASPWEDRAFT_174736	-4.08068	0.0196116	downregulated	3.5293	3.93952e-05	upregulated	4.18975	4.4178e-07	upregulated	-0.0938854	0.950822		3.42376	0.0576643		6.35647	2.5439e-05	upregulated	0	1
ASPWEDRAFT_177486	-1.37339	0.028538	downregulated	1.14992	0.012154	upregulated	1.5694	0.000270516	upregulated	0.616477	0.249067		0.788454	0.251191		0.847589	0.18668		1.32994	0.0395941	upregulated
ASPWEDRAFT_184573	-1.37099	0.0311517	downregulated	1.05874	0.0206839	upregulated	2.2489	3.60167e-08	upregulated	0.818499	0.104548		1.67886	0.00541099	upregulated	2.22282	5.8285e-05	upregulated	1.7206	0.0055885	upregulated
ASPWEDRAFT_218330	-1.66745	0.0165741	downregulated	1.36875	0.0225739	upregulated	1.4709	0.0105453	upregulated	-0.202559	0.797458		1.36345	0.0476267	upregulated	2.81953	3.95152e-06	upregulated	1.06018	0.15211
ASPWEDRAFT_25587	-1.06112	0.0307536	downregulated	2.94502	1.69e-14	upregulated	1.91969	8.12162e-07	upregulated	0.839307	0.0634117		1.55811	0.000518645	upregulated	2.13021	4.22332e-07	upregulated	1.38968	0.00273133	upregulated
ASPWEDRAFT_28578	-1.51727	0.044718	downregulated	2.72057	3.22378e-05	upregulated	2.94811	3.74097e-06	upregulated	0.165162	0.858674		-0.205566	0.80826		2.88011	9.24551e-06	upregulated	-0.997252	0.188217
ASPWEDRAFT_29276	-1.34048	0.0392965	downregulated	1.41576	0.00579323	upregulated	2.18642	5.33245e-06	upregulated	0.505054	0.414965		1.36654	0.0284443	upregulated	2.99697	3.63126e-08	upregulated	-0.870121	0.315573
ASPWEDRAFT_34556	-1.36794	4.25793e-05	downregulated	1.09064	0.000583541	upregulated	1.2586	3.99053e-05	upregulated	-0.128722	0.761554		0.347528	0.367287		1.67653	1.07015e-07	upregulated	0.224153	0.60116
ASPWEDRAFT_34912	-1.75658	0.00478344	downregulated	1.29282	0.0262262	upregulated	1.65962	0.00252641	upregulated	0.594932	0.371196		1.44463	0.0185654	upregulated	1.78529	0.00215318	upregulated	1.20256	0.0605807
ASPWEDRAFT_35959	-1.18663	0.00579175	downregulated	1.92258	6.15462e-07	upregulated	2.26067	1.62803e-09	upregulated	-0.468343	0.313668		1.36714	0.000779376	upregulated	3.4284	3.74917e-20	upregulated	0.110657	0.845283
ASPWEDRAFT_36488	-1.17866	6.93078e-06	downregulated	1.52142	1.17024e-10	upregulated	2.17874	1.43085e-21	upregulated	0.486996	0.0761754		0.887901	0.000984596		1.43767	8.31917e-09	upregulated	0.841801	0.00227647
ASPWEDRAFT_38680	-1.25125	9.64868e-06	downregulated	1.89285	5.97451e-13	upregulated	2.91648	2.05084e-30	upregulated	-0.917184	0.00150728		1.63579	2.25834e-09	upregulated	3.55455	2.15808e-43	upregulated	0.0772033	0.845627
ASPWEDRAFT_40171	-1.83619	0.00274822	downregulated	1.81771	0.000799558	upregulated	1.98843	0.000156958	upregulated	0.921832	0.130099		0.888899	0.17462		1.37741	0.0208876	upregulated	0.721087	0.302761
ASPWEDRAFT_404768	-1.75069	0.000107668	downregulated	1.91409	1.84168e-06	upregulated	1.47875	0.000230198	upregulated	0.0325059	0.958027		1.18765	0.0109607	upregulated	2.29602	5.66471e-08	upregulated	0.455054	0.41327
ASPWEDRAFT_40597	-2.00622	0.0112322	downregulated	1.42907	0.00838943	upregulated	1.23326	0.0213745	upregulated	1.14235	0.0529015		0.924765	0.314406		1.80428	0.0180237	upregulated	0.592546	0.587705
ASPWEDRAFT_41644	-1.05529	0.039385	downregulated	1.95024	7.02687e-06	upregulated	3.0598	1.69601e-13	upregulated	-0.0449779	0.946388		1.69015	0.000233048	upregulated	2.64663	8.69013e-10	upregulated	1.00084	0.0425129	upregulated
ASPWEDRAFT_42960	-2.82346	0.0155537	downregulated	2.01982	0.00443541	upregulated	1.73351	0.0134399	upregulated	-0.439478	0.655525		1.83792	0.140487		3.22419	0.00256078	upregulated	1.42023	0.311144
ASPWEDRAFT_44864	-2.43429	0.00554479	downregulated	2.38861	4.09896e-07	upregulated	2.64698	8.43996e-09	upregulated	-0.467284	0.508927		2.16161	0.0155999	upregulated	3.47446	1.00167e-05	upregulated	0.0185756	0.994679
ASPWEDRAFT_45265	-3.11098	0.000351374	downregulated	1.75165	0.0332724	upregulated	1.58633	0.0469092	upregulated	-0.408028	0.690051		1.17173	0.222319		3.6395	8.0852e-06	upregulated	0.803471	0.448861
ASPWEDRAFT_47034	-2.56663	5.02127e-08	downregulated	1.20555	0.000798087	upregulated	1.32087	0.000154446	upregulated	0.0369765	0.947246		2.77815	4.27814e-09	upregulated	4.11413	7.85662e-21	upregulated	1.56949	0.00345428	upregulated
ASPWEDRAFT_477943	-2.7541	2.40259e-08	downregulated	1.57045	0.0014919	upregulated	2.51119	7.73591e-08	upregulated	0.0154098	0.98483		1.0258	0.0562453		3.96094	3.08523e-17	upregulated	-0.340355	0.602092
ASPWEDRAFT_51831	-1.90334	0.0376382	downregulated	1.39558	0.0143251	upregulated	1.76972	0.00100369	upregulated	0.852375	0.194586		1.57968	0.0906221		2.12167	0.0113012	upregulated	1.25207	0.230696
ASPWEDRAFT_52120	-1.86825	0.000538652	downregulated	1.61816	0.000144827	upregulated	1.02207	0.0186102	upregulated	0.34411	0.52873		1.06021	0.0726752		2.32244	4.16376e-06	upregulated	0.91662	0.149102
ASPWEDRAFT_540500	-1.68658	0.0137701	downregulated	1.87423	0.000250864	upregulated	2.04449	3.91474e-05	upregulated	0.30229	0.66031		1.44435	0.0355	upregulated	4.34606	3.96158e-14	upregulated	0.919557	0.2416
ASPWEDRAFT_615253	-1.10793	0.0184285	downregulated	1.16116	0.00126337	upregulated	1.40369	4.89594e-05	upregulated	0.441061	0.313622		1.02113	0.03008	upregulated	1.11761	0.0119205	upregulated	0.236391	0.718557
ASPWEDRAFT_70113	-1.09537	0.000736085	downregulated	2.44432	1.50004e-18	upregulated	1.95033	2.14242e-12	upregulated	0.775376	0.0148141		2.11794	1.51638e-12	upregulated	2.30463	2.09783e-15	upregulated	1.73123	1.75292e-08	upregulated
ASPWEDRAFT_70538	-1.49272	0.017897	downregulated	1.27581	0.0148927	upregulated	1.11267	0.030273	upregulated	-0.42455	0.516369		-0.675675	0.387373		0.900572	0.155362		-1.32512	0.123507
ASPWEDRAFT_73305	-2.17365	0.00326212	downregulated	1.07562	0.0344851	upregulated	1.42904	0.00269245	upregulated	0.328039	0.61041		-1.07693	0.373493		0.6493	0.468796		-2.62477	0.109396
ASPWEDRAFT_79182	-1.18727	0.0158596	downregulated	1.62099	0.000108382	upregulated	2.64339	2.74578e-11	upregulated	0.0531158	0.93415		1.06483	0.0264129	upregulated	1.23478	0.00681584	upregulated	-0.124137	0.855385
ASPWEDRAFT_48969	-1.9862	0.000152629	downregulated	1.39763	0.00555624	upregulated	0.370947	0.506919		-1.38867	0.00916119	downregulated	0.143073	0.829934		1.89649	0.000162882	upregulated	-1.1653	0.050548
ASPWEDRAFT_109021	-1.76401	0.000638655	downregulated	2.03908	3.94601e-08	upregulated	0.381025	0.384979		1.45185	0.000288609	upregulated	1.35562	0.0128201	upregulated	0.746688	0.195428		1.62186	0.00285347	upregulated
ASPWEDRAFT_112958	-1.16306	0.0119937	downregulated	2.26014	1.5814e-08	upregulated	0.805716	0.0569072		1.6081	0.000146127	upregulated	0.901808	0.0472467		1.76405	2.07801e-05	upregulated	1.01183	0.0269248	upregulated
ASPWEDRAFT_117644	-3.33816	2.07016e-23	downregulated	1.33707	4.40875e-05	upregulated	0.375708	0.293612		2.78674	2.25196e-18	upregulated	2.61991	3.14451e-14	upregulated	1.79444	2.36772e-07	upregulated	3.21881	1.90571e-21	upregulated
ASPWEDRAFT_119112	-1.71971	0.000242665	downregulated	1.74276	2.76123e-07	upregulated	0.767396	0.0341241		1.98482	9.34602e-09	upregulated	2.05671	7.82641e-06	upregulated	0.941538	0.0609492		2.43322	8.90178e-08	upregulated
ASPWEDRAFT_120960	-1.38803	9.69485e-07	downregulated	1.34134	2.62558e-07	upregulated	0.26153	0.376922		1.78887	6.70458e-12	upregulated	1.53294	5.11646e-08	upregulated	0.964083	0.000727278		1.95694	1.43412e-12	upregulated
ASPWEDRAFT_121781	-1.1794	0.0013383	downregulated	1.70125	2.57351e-07	upregulated	-0.284628	0.455604		1.14704	0.00118035	upregulated	1.01519	0.00521754	upregulated	0.765629	0.0347394		1.35947	0.000140663	upregulated
ASPWEDRAFT_126392	-2.50743	5.76465e-09	downregulated	1.07242	0.0155476	upregulated	0.251712	0.610611		1.40374	0.00165691	upregulated	1.51222	0.000744284	upregulated	2.03556	1.73415e-06	upregulated	1.5521	0.000581823	upregulated
ASPWEDRAFT_143872	-2.32228	0.00227857	downregulated	1.49227	0.00417092	upregulated	-0.435748	0.482377		1.44523	0.00846917	upregulated	2.06872	0.00737564	upregulated	2.42612	0.00078863	upregulated	2.28243	0.0033428	upregulated
ASPWEDRAFT_160833	-1.48203	0.00268755	downregulated	2.10304	2.64927e-06	upregulated	0.76819	0.105501		2.39604	1.51746e-07	upregulated	2.48994	5.09478e-08	upregulated	2.38887	8.7666e-08	upregulated	3.08623	6.93614e-12	upregulated
ASPWEDRAFT_162454	-3.13525	1.24415e-18	downregulated	1.38653	6.6733e-05	upregulated	0.238839	0.551714		1.21906	0.00082101	upregulated	1.97119	1.40528e-07	upregulated	1.89512	2.13699e-07	upregulated	2.02944	6.85025e-08	upregulated
ASPWEDRAFT_166657	-1.14551	0.0112646	downregulated	1.36963	0.000618612	upregulated	0.010697	0.984727		1.07461	0.0117885	upregulated	0.963761	0.0292188		0.0735666	0.895209		0.934308	0.0393897
ASPWEDRAFT_168648	-6.29043	3.90661e-07	downregulated	2.03277	1.17452e-05	upregulated	0.850635	0.082969		2.12297	8.6769e-06	upregulated	3.74485	0.00475463	upregulated	0.580465	0.764553		2.9257	0.04274	upregulated
ASPWEDRAFT_168693	-1.27189	0.000206349	downregulated	1.04915	0.000779771	upregulated	-0.456199	0.172432		1.68739	4.55191e-08	upregulated	2.47095	7.75403e-15	upregulated	1.22168	0.000219845	upregulated	2.95705	3.07016e-21	upregulated
ASPWEDRAFT_172797	-2.1785	5.79208e-05	downregulated	1.72683	0.000480417	upregulated	0.413999	0.454848		1.66622	0.00120511	upregulated	1.08803	0.0605746		0.546178	0.374571		1.37513	0.0168641	upregulated
ASPWEDRAFT_174158	-3.61921	2.56035e-06	downregulated	1.83805	1.21005e-06	upregulated	-0.233513	0.632352		2.53978	1.65123e-11	upregulated	1.9019	0.0315623	upregulated	0.959273	0.331098		3.51517	8.78704e-06	upregulated
ASPWEDRAFT_177568	-1.20786	0.0202105	downregulated	1.52039	0.00101567	upregulated	-0.273504	0.608578		1.12931	0.0227359	upregulated	0.833829	0.105044		1.02589	0.0350512	upregulated	1.61697	0.000832795	upregulated
ASPWEDRAFT_202124	-1.05539	0.00177769	downregulated	1.18562	5.26034e-06	upregulated	0.0215272	0.952314		1.30655	1.18427e-06	upregulated	0.437651	0.2693		0.748444	0.0298394		1.24891	0.000280797	upregulated
ASPWEDRAFT_22817	-1.11775	0.00481793	downregulated	1.41545	0.000101481	upregulated	0.829101	0.0249887		1.04675	0.00706744	upregulated	1.35451	0.000290971	upregulated	2.03009	9.4605e-09	upregulated	1.31478	0.000490138	upregulated
ASPWEDRAFT_235243	-1.42079	0.00133678	downregulated	1.17789	0.00366796	upregulated	-0.256221	0.58062		1.57781	0.000109829	upregulated	0.988595	0.0285207		0.877159	0.0472456		1.54856	0.000371252	upregulated
ASPWEDRAFT_24619	-2.24894	8.90836e-05	downregulated	1.02793	0.0274425	upregulated	0.272468	0.602743		1.68348	0.000221547	upregulated	1.86194	0.00166047	upregulated	1.29329	0.0324046	upregulated	2.26599	0.000109104	upregulated
ASPWEDRAFT_28167	-1.36416	0.00420719	downregulated	1.69949	1.22838e-05	upregulated	-0.545491	0.215572		1.49481	0.00025195	upregulated	0.887282	0.0754214		-0.361048	0.529171		1.9545	1.67039e-05	upregulated
ASPWEDRAFT_28532	-1.6663	0.0033921	downregulated	2.36097	1.5015e-06	upregulated	-0.561063	0.311811		1.34408	0.012515	upregulated	0.569939	0.369062		0.823782	0.156576		1.26549	0.0297126	upregulated
ASPWEDRAFT_32054	-1.4295	0.00332178	downregulated	1.29979	0.00396956	upregulated	0.110055	0.842818		1.32595	0.00461931	upregulated	1.49131	0.0014376	upregulated	1.38106	0.00258028	upregulated	1.55677	0.000952748	upregulated
ASPWEDRAFT_35915	-1.43791	0.0339118	downregulated	1.60771	0.0014919	upregulated	0.396056	0.497497		1.5659	0.00317441	upregulated	1.23155	0.068192		1.67376	0.00672812	upregulated	0.927785	0.21505
ASPWEDRAFT_36443	-3.27831	1.82694e-08	downregulated	1.7426	0.00331103	upregulated	0.625734	0.323912		1.53266	0.0140485	upregulated	1.95444	0.0012072	upregulated	1.40594	0.0200848	upregulated	1.98578	0.00110075	upregulated
ASPWEDRAFT_37720	-2.97443	0.00270433	downregulated	1.82527	0.0242853	upregulated	0.209929	0.829779		1.68114	0.0479331	upregulated	1.44057	0.185562		2.66497	0.00501341	upregulated	1.62424	0.140779
ASPWEDRAFT_37766	-1.24413	3.30192e-05	downregulated	1.13127	1.53078e-05	upregulated	0.496613	0.0718909		1.34324	4.6292e-07	upregulated	1.50921	3.11562e-07	upregulated	1.07163	0.000299969	upregulated	1.74427	2.63189e-09	upregulated
ASPWEDRAFT_39651	-1.54683	0.000933248	downregulated	1.82945	6.81114e-06	upregulated	0.945635	0.0242485		2.59025	1.7161e-10	upregulated	2.96207	5.36812e-12	upregulated	2.28658	9.27115e-08	upregulated	3.31562	7.11792e-15	upregulated
ASPWEDRAFT_40602	-4.4639	2.06841e-09	downregulated	2.03016	0.00287103	upregulated	0.623895	0.399557		3.07443	5.44828e-06	upregulated	2.86886	0.00023117	upregulated	1.89197	0.0172553	upregulated	2.85997	0.000287558	upregulated
ASPWEDRAFT_41410	-3.97816	8.42005e-05	downregulated	2.4583	0.00312767	upregulated	0.2332	0.819412		2.14585	0.0144217	upregulated	2.26943	0.034329	upregulated	3.85683	7.21348e-05	upregulated	2.2224	0.0445484	upregulated
ASPWEDRAFT_42514	-1.17849	0.00436343	downregulated	1.07225	0.00363451	upregulated	-0.126392	0.777831		1.19954	0.00154359	upregulated	0.739139	0.0832142		0.506374	0.241895		1.48608	0.000191651	upregulated
ASPWEDRAFT_42623	-2.20971	0.0125644	downregulated	2.73592	7.70754e-05	upregulated	0.329481	0.696481		1.76615	0.0192241	upregulated	0.480957	0.65456		0.901086	0.342136		0.926245	0.372848
ASPWEDRAFT_42626	-2.23008	0.00383281	downregulated	2.61199	5.84042e-05	upregulated	-0.182129	0.826046		1.60916	0.0233616	upregulated	0.962187	0.253357		1.61939	0.0315649	upregulated	1.6014	0.0452352	upregulated
ASPWEDRAFT_437139	-3.32407	3.13996e-06	downregulated	1.90909	0.000699059	upregulated	0.982703	0.0917745		2.13037	0.000216263	upregulated	2.11113	0.00554875	upregulated	1.76086	0.0196104	upregulated	1.91189	0.0163915	upregulated
ASPWEDRAFT_45253	-1.74898	0.0124385	downregulated	1.6366	0.0037162	upregulated	0.238795	0.724595		1.22193	0.0454064	upregulated	1.42167	0.0426908	upregulated	2.05002	0.00141822	upregulated	1.84511	0.00748246	upregulated
ASPWEDRAFT_45989	-1.05533	0.0394461	downregulated	1.2311	0.00749156	upregulated	0.309784	0.544637		1.33682	0.00481766	upregulated	0.852942	0.0816593		0.149482	0.795144		1.11915	0.0205931	upregulated
ASPWEDRAFT_470686	-2.07557	0.000360348	downregulated	1.86004	0.000354566	upregulated	-0.153769	0.813753		1.30048	0.0206246	upregulated	1.51444	0.0105527	upregulated	0.843729	0.171444		1.8528	0.00160005	upregulated
ASPWEDRAFT_49914	-1.35727	0.0133196	downregulated	2.00117	2.34886e-06	upregulated	0.0921454	0.870956		1.56484	0.000544977	upregulated	0.606712	0.320657		0.91513	0.0940435		1.39852	0.0108246	upregulated
ASPWEDRAFT_52504	-1.34874	3.34533e-08	downregulated	1.24256	1.48118e-07	upregulated	0.619423	0.0107953		1.31991	4.63362e-08	upregulated	1.8989	1.23597e-15	upregulated	1.2611	1.22967e-07	upregulated	1.83224	1.49509e-14	upregulated
ASPWEDRAFT_53236	-1.85306	6.84914e-05	downregulated	1.47849	0.00014422	upregulated	0.752109	0.0629884		1.30653	0.00144693	upregulated	1.65208	0.000476272	upregulated	1.11964	0.0198258	upregulated	1.74644	0.000261726	upregulated
ASPWEDRAFT_54465	-1.53435	0.0235987	downregulated	1.77515	0.00299456	upregulated	0.872999	0.158802		2.52197	2.44138e-05	upregulated	2.01939	0.00122107	upregulated	2.23486	0.000206632	upregulated	2.08116	0.000934174	upregulated
ASPWEDRAFT_54582	-3.55101	7.19597e-07	downregulated	2.2599	0.00126546	upregulated	-0.145595	0.868254		2.05263	0.00521153	upregulated	3.06001	2.09333e-05	upregulated	3.15301	6.33522e-06	upregulated	2.47139	0.000814793	upregulated
ASPWEDRAFT_55022	-3.77391	0.0210168	downregulated	2.74256	2.61629e-05	upregulated	-0.355467	0.699014		1.75171	0.0172214	upregulated	3.16305	0.0552158		2.12529	0.227812		-0.360273	0.89888
ASPWEDRAFT_582858	-2.12144	8.83725e-12	downregulated	1.32498	2.32202e-05	upregulated	-0.0320905	0.9371		1.29406	6.45047e-05	upregulated	0.949773	0.00420695		0.881169	0.00673888		0.864462	0.0108025
ASPWEDRAFT_62283	-2.29378	0.000651786	downregulated	1.27833	0.00349916	upregulated	0.161133	0.769283		1.79112	4.322e-05	upregulated	1.79794	0.0114076	upregulated	0.225508	0.816877		1.46938	0.0592469
ASPWEDRAFT_643803	-1.40532	0.00541419	downregulated	1.09969	0.0171162	upregulated	0.190949	0.721289		1.41172	0.00240312	upregulated	1.08957	0.0305565	upregulated	1.28515	0.00729965	upregulated	1.62595	0.000858587	upregulated
ASPWEDRAFT_108100	-2.36731	0.000166678	downregulated	1.32462	0.0357416	upregulated	-0.254972	0.722277		-0.439315	0.556506		-0.752154	0.285527		0.532224	0.448503		-0.431637	0.58201
ASPWEDRAFT_112790	-2.33541	0.00424848	downregulated	3.4442	6.88249e-08	upregulated	0.755265	0.293075		1.3342	0.0683696		0.600367	0.540803		1.07923	0.210075		0.758395	0.452654
ASPWEDRAFT_114787	-1.74244	0.041556	downregulated	2.66608	0.000120037	upregulated	1.11593	0.127048		1.10797	0.164301		1.75294	0.0296094	upregulated	2.05847	0.0072622	upregulated	0.990365	0.27521
ASPWEDRAFT_115060	-1.04634	0.0331362	downregulated	1.97109	8.27323e-07	upregulated	0.0870495	0.868608		0.975272	0.0292646		0.743213	0.130331		0.681283	0.153692		0.55841	0.292594
ASPWEDRAFT_122800	-2.57222	0.00027504	downregulated	1.58808	0.018854	upregulated	0.265837	0.734315		1.05905	0.149421		1.23127	0.101621		2.36864	0.000483139	upregulated	1.60933	0.0298024	upregulated
ASPWEDRAFT_130038	-2.6248	0.0118885	downregulated	2.44434	7.90774e-05	upregulated	0.984247	0.143181		1.21294	0.0895428		1.99553	0.0645259		2.54131	0.0101038	upregulated	3.07847	0.0022994	upregulated
ASPWEDRAFT_153476	-2.6434	3.26397e-08	downregulated	1.40899	0.00307328	upregulated	0.322375	0.546017		-0.305831	0.606362		1.73258	0.000457613	upregulated	2.38197	3.63352e-07	upregulated	1.0286	0.0534415
ASPWEDRAFT_159902	-1.77324	0.0310659	downregulated	1.67332	0.00427602	upregulated	1.05851	0.0776572		-0.960016	0.20537		1.48684	0.0717486		3.09156	1.1707e-05	upregulated	0.187255	0.882455
ASPWEDRAFT_166174	-1.1057	0.0149248	downregulated	1.01194	0.00552583	upregulated	0.788304	0.0306257		0.548049	0.190936		1.03126	0.0228928	upregulated	1.69066	3.0957e-05	upregulated	0.587834	0.262218
ASPWEDRAFT_166217	-2.31861	0.000461508	downregulated	1.46596	0.019479	upregulated	0.973881	0.121392		1.15755	0.0835439		1.94312	0.00318562	upregulated	1.26462	0.0590792		2.12082	0.00133569	upregulated
ASPWEDRAFT_167873	-2.54406	0.0124974	downregulated	2.76763	0.00275808	upregulated	-0.343012	0.756604		0.503125	0.668529		-0.178984	0.885232		2.81424	0.00257816	upregulated	-0.377284	0.775648
ASPWEDRAFT_167886	-1.28581	0.00561068	downregulated	1.77414	2.19774e-05	upregulated	-0.477669	0.299111		0.579922	0.236283		0.283694	0.586394		0.390218	0.430445		0.499033	0.329086
ASPWEDRAFT_169781	-2.95788	0.00239573	downregulated	1.27395	0.0356795	upregulated	0.575953	0.374444		-0.232087	0.780092		4.3652	1.3355e-06	upregulated	3.6059	6.11997e-05	upregulated	3.18206	0.000981136	upregulated
ASPWEDRAFT_169940	-2.56182	0.00636969	downregulated	2.26338	0.0027295	upregulated	-0.471749	0.59227		0.392767	0.689387		0.471842	0.686701		2.39077	0.00714188	upregulated	1.33992	0.201582
ASPWEDRAFT_171420	-5.17778	0.00152294	downregulated	2.45022	0.00249919	upregulated	-0.125005	0.90574		1.46215	0.104057		3.31925	0.0557328		5.15261	0.000870489	upregulated	4.18736	0.01302	upregulated
ASPWEDRAFT_171879	-1.96008	4.82609e-06	downregulated	1.44975	0.000132471	upregulated	-0.116464	0.808403		0.735282	0.0848316		1.21129	0.00795204	upregulated	1.72364	4.50702e-05	upregulated	1.24263	0.0076134	upregulated
ASPWEDRAFT_173074	-2.48684	0.00775022	downregulated	2.7416	3.44614e-05	upregulated	-1.02838	0.179272		0.455354	0.602131		1.52914	0.125474		1.10824	0.272759		1.6666	0.1015
ASPWEDRAFT_174467	-1.96186	0.00335932	downregulated	1.57565	0.0121101	upregulated	0.220516	0.765038		0.744401	0.295784		1.10731	0.107523		1.51649	0.0182326	upregulated	1.90555	0.00358329	upregulated
ASPWEDRAFT_185366	-1.53988	0.0113199	downregulated	1.91619	0.0003982	upregulated	0.984417	0.0771293		0.523946	0.421988		0.184445	0.796836		0.567954	0.37048		-0.206494	0.797869
ASPWEDRAFT_204933	-1.05445	0.00959165	downregulated	1.18473	0.00162313	upregulated	-0.137278	0.760087		0.16643	0.734308		0.492553	0.241118		0.974139	0.0103619		0.500381	0.244256
ASPWEDRAFT_220136	-2.11012	0.0154615	downregulated	2.76867	0.000245016	upregulated	0.281251	0.759791		0.451983	0.641974		1.04109	0.251856		1.6898	0.0406815	upregulated	-0.243162	0.839111
ASPWEDRAFT_22997	-1.11381	0.0098187	downregulated	1.13086	0.0044549	upregulated	-0.186566	0.687538		0.543349	0.226765		1.23779	0.00240627	upregulated	0.43735	0.323973		1.61613	5.7949e-05	upregulated
ASPWEDRAFT_25023	-1.75798	0.00769766	downregulated	2.81208	1.75711e-06	upregulated	0.588903	0.373052		-0.0423002	0.962254		2.48791	4.8299e-05	upregulated	3.97188	5.94336e-12	upregulated	1.50062	0.0207434	upregulated
ASPWEDRAFT_26401	-1.58536	0.000595659	downregulated	1.42286	0.000499454	upregulated	0.0918131	0.859601		0.503612	0.296769		0.730747	0.147512		1.46137	0.00102997	upregulated	0.631412	0.237198
ASPWEDRAFT_27147	-2.99438	5.24606e-14	downregulated	1.07722	0.0106783	upregulated	-0.942914	0.0222975		0.627753	0.177479		0.562832	0.226762		-0.201758	0.691922		0.334637	0.517635
ASPWEDRAFT_30335	-1.2542	0.0112646	downregulated	1.02531	0.00472508	upregulated	0.444997	0.259689		0.216263	0.658207		1.07943	0.0341905	upregulated	1.22362	0.0101025	upregulated	0.65463	0.274293
ASPWEDRAFT_311425	-1.11372	0.00277894	downregulated	1.52391	7.68439e-06	upregulated	0.614312	0.0858684		0.95743	0.00940861		0.682275	0.0690573		0.966494	0.00622868		0.837199	0.0249222
ASPWEDRAFT_31955	-3.2398	0.000581126	downregulated	1.5814	0.0366392	upregulated	-0.836944	0.298435		0.508321	0.577156		2.46862	0.0103554	upregulated	2.81936	0.00201582	upregulated	2.26822	0.0236272	upregulated
ASPWEDRAFT_32782	-1.83504	2.25591e-05	downregulated	1.12778	0.00545195	upregulated	-0.540359	0.207119		0.744233	0.0931528		2.29455	5.09478e-08	upregulated	2.08538	4.30807e-07	upregulated	2.46921	4.14587e-09	upregulated
ASPWEDRAFT_33326	-1.32561	0.00118031	downregulated	1.11962	0.00314736	upregulated	-0.473173	0.241357		0.299789	0.516369		1.77685	4.75722e-06	upregulated	1.16483	0.00295967	upregulated	2.03602	1.26966e-07	upregulated
ASPWEDRAFT_33334	-2.96216	2.59733e-06	downregulated	1.3579	0.0372991	upregulated	-0.666442	0.322576		0.24106	0.769751		1.44918	0.0285878	upregulated	2.18192	0.000449205	upregulated	1.69142	0.0104489	upregulated
ASPWEDRAFT_33496	-1.49816	0.0430972	downregulated	1.31946	0.0303566	upregulated	-0.106664	0.886659		0.52523	0.465691		0.714965	0.369337		1.5176	0.0256653	upregulated	0.66502	0.434875
ASPWEDRAFT_34375	-1.81304	0.0269248	downregulated	1.66186	0.0176444	upregulated	-0.933189	0.206799		0.671433	0.411301		0.915574	0.288905		1.40667	0.0711318		1.47875	0.0728864
ASPWEDRAFT_34416	-1.07162	0.0313281	downregulated	1.3717	0.000342064	upregulated	0.960651	0.0133424		-0.625627	0.197361		1.93903	1.2925e-05	upregulated	2.93194	8.44229e-13	upregulated	-0.356835	0.602086
ASPWEDRAFT_36484	-4.46609	9.55459e-11	downregulated	2.00567	0.000652547	upregulated	0.575054	0.373125		0.898768	0.178998		1.83935	0.0179352	upregulated	2.88811	4.30041e-05	upregulated	1.44989	0.0830563
ASPWEDRAFT_37741	-1.44653	0.00682679	downregulated	1.90146	8.78156e-05	upregulated	0.854277	0.090481		-0.601809	0.293487		0.325695	0.585391		2.22424	3.73174e-06	upregulated	0.306729	0.631076
ASPWEDRAFT_39573	-2.42874	0.00378759	downregulated	1.68079	0.00571579	upregulated	-0.304355	0.680711		1.04238	0.12415		1.50746	0.0946684		2.35044	0.00327821	upregulated	1.74409	0.0548533
ASPWEDRAFT_39676	-1.63499	0.0453397	downregulated	1.78534	0.0151419	upregulated	-0.276909	0.74709		0.267059	0.77715		0.435093	0.622105		1.29575	0.0880611		1.41351	0.0735156
ASPWEDRAFT_39788	-2.20767	0.0274103	downregulated	2.18597	0.0112216	upregulated	-0.370015	0.713781		1.63758	0.0767044		0.57942	0.608038		2.17193	0.018271	upregulated	1.51541	0.139239
ASPWEDRAFT_40206	-2.41648	0.0103601	downregulated	3.12322	0.00025107	upregulated	-0.299176	0.773292		0.653089	0.537013		0.565201	0.587988		1.3613	0.14198		0.498177	0.658779
ASPWEDRAFT_40414	-2.02793	0.000528235	downregulated	1.99521	0.000239742	upregulated	-0.00735905	0.991739		0.562305	0.388402		0.180237	0.803236		1.51326	0.00793729	upregulated	0.858114	0.181629
ASPWEDRAFT_41253	-1.38257	0.0142882	downregulated	1.59313	0.00115392	upregulated	0.614095	0.24052		-0.510833	0.392078		1.25669	0.021892	upregulated	3.50682	3.77448e-13	upregulated	-0.0490419	0.952604
ASPWEDRAFT_41323	-3.68013	0.0190682	downregulated	2.26158	0.00840128	upregulated	-0.970635	0.331884		1.25752	0.196507		0.273306	0.909927		2.66022	0.0850291		1.64505	0.392775
ASPWEDRAFT_41540	-2.16516	0.0419956	downregulated	1.50285	0.035614	upregulated	-0.561926	0.503859		-0.537755	0.57153		0.707289	0.581032		1.65482	0.110986		1.75982	0.115496
ASPWEDRAFT_42082	-1.78836	0.00856857	downregulated	2.70364	3.88004e-06	upregulated	0.480667	0.476536		1.25369	0.0567749		0.904093	0.203634		1.06172	0.11459		1.36617	0.0469472	upregulated
ASPWEDRAFT_42597	-2.04412	0.0229398	downregulated	1.8059	0.0181165	upregulated	0.145114	0.87688		0.220229	0.828664		1.57858	0.0760138		2.30349	0.0049284	upregulated	0.61437	0.57386
ASPWEDRAFT_42625	-3.55935	0.000402522	downregulated	2.24147	0.0211423	upregulated	-1.00012	0.326191		-0.0687973	0.960355		0.503692	0.677554		2.58904	0.00833191	upregulated	1.33099	0.235651
ASPWEDRAFT_42890	-3.09935	9.94298e-07	downregulated	1.03755	0.039089	upregulated	-0.655123	0.213887		0.45597	0.4357		1.39762	0.055252		1.71878	0.0106807	upregulated	1.513	0.0427295	upregulated
ASPWEDRAFT_45288	-1.69293	0.017855	downregulated	3.0286	1.0181e-06	upregulated	-0.206052	0.791212		1.10056	0.121555		0.798638	0.280825		1.47335	0.0273917	upregulated	1.08575	0.135994
ASPWEDRAFT_46014	-3.27431	0.00578013	downregulated	3.51069	1.23464e-06	upregulated	0.6192	0.468133		1.48188	0.0750589		2.07112	0.10121		1.9322	0.115512		2.69263	0.0284361	upregulated
ASPWEDRAFT_46676	-3.35142	3.00134e-09	downregulated	2.04877	6.36837e-05	upregulated	0.594018	0.288284		0.971296	0.09146		1.4474	0.0206333	upregulated	1.36816	0.0243981	upregulated	1.55415	0.0141197	upregulated
ASPWEDRAFT_49414	-1.92895	0.0056878	downregulated	1.50504	0.00247962	upregulated	0.0990455	0.877886		-0.101193	0.894581		2.32803	0.000490733	upregulated	2.81617	6.96611e-06	upregulated	1.24949	0.11322
ASPWEDRAFT_55057	-1.84962	0.00226733	downregulated	1.69343	0.00241243	upregulated	-0.588625	0.330354		0.0621335	0.941096		0.609822	0.362715		1.185	0.0466482	upregulated	0.676025	0.323466
ASPWEDRAFT_59818	-5.25923	6.7734e-08	downregulated	1.78446	0.0172531	upregulated	-1.19943	0.116149		0.377186	0.688795		2.99096	0.00417599	upregulated	3.95111	5.07168e-05	upregulated	3.11585	0.00317556	upregulated
ASPWEDRAFT_656080	-1.6602	0.0337038	downregulated	2.63868	7.68004e-05	upregulated	0.234705	0.775087		-0.252545	0.779984		0.727326	0.37255		2.40475	0.000493035	upregulated	0.117897	0.911498
ASPWEDRAFT_691921	-3.89374	0.00957117	downregulated	2.05466	0.0103378	upregulated	0.410978	0.661812		1.55138	0.0739952		2.23397	0.172117		3.99974	0.00427461	upregulated	3.0767	0.048577	upregulated
ASPWEDRAFT_733021	-3.40668	0.0474252	downregulated	3.01783	3.73106e-05	upregulated	0.81599	0.347006		0.332976	0.76597		5.56785	0.000207954	upregulated	5.19281	0.000423736	upregulated	2.07327	0.307143
ASPWEDRAFT_117576	-1.15812	0.0320672	downregulated	-0.848721	0.0993844		-1.9127	3.86742e-05	downregulated	-1.05481	0.0436573	downregulated	-0.166305	0.7823		0.271211	0.639754		-0.285285	0.644696
ASPWEDRAFT_121049	-1.67716	0.00825616	downregulated	-0.309445	0.670346		-1.81082	0.00161577	downregulated	-2.08563	0.000542542	downregulated	-1.5661	0.0110145	downregulated	0.418576	0.540701		-1.43036	0.023434	downregulated
ASPWEDRAFT_122152	-3.43216	3.69075e-23	downregulated	-0.97903	0.00782735		-1.93693	1.59327e-08	downregulated	-1.27166	0.000629613	downregulated	1.18656	0.00173245	upregulated	1.61463	6.93654e-06	upregulated	1.45177	0.000111688	upregulated
ASPWEDRAFT_156486	-5.37842	8.7373e-06	downregulated	-1.03957	0.374845		-2.51318	0.015869	downregulated	-3.39457	0.00228034	downregulated	1.08826	0.468381		4.92606	2.62084e-05	upregulated	0.606094	0.736295
ASPWEDRAFT_157154	-1.3388	1.10434e-06	downregulated	-0.777148	0.002996		-1.36959	8.48269e-08	downregulated	-2.28229	2.21632e-15	downregulated	-0.700155	0.0382104		0.113388	0.755659		-1.71257	1.01806e-05	downregulated
ASPWEDRAFT_164262	-2.2289	0.043636	downregulated	-1.09845	0.255218		-4.14891	0.00056472	downregulated	-2.86755	0.0099571	downregulated	0.274564	0.845842		-0.44975	0.750956		0.38074	0.807257
ASPWEDRAFT_167209	-4.04757	2.05931e-09	downregulated	-0.124888	0.887056		-2.15313	0.000977361	downregulated	-1.58941	0.026326	downregulated	1.00302	0.20027		1.87665	0.00756775	upregulated	0.261916	0.793992
ASPWEDRAFT_169999	-1.41207	0.00444849	downregulated	-0.60301	0.23681		-1.18185	0.0101503	downregulated	-2.11764	5.13715e-06	downregulated	-0.94775	0.055252		0.252641	0.650619		-1.53314	0.00134928	downregulated
ASPWEDRAFT_173965	-6.37953	1.05364e-12	downregulated	-1.54675	0.118007		-2.9564	0.00105326	downregulated	-4.53865	8.22556e-07	downregulated	-0.352592	0.763463		0.559688	0.615414		-0.842434	0.464337
ASPWEDRAFT_176427	-5.49604	9.11515e-06	downregulated	-1.93684	0.101977		-5.17835	4.7202e-06	downregulated	-3.52969	0.00278842	downregulated	0.541577	0.740403		0.474626	0.771901		-0.278894	0.891497
ASPWEDRAFT_176435	-3.45067	1.07529e-06	downregulated	-0.0304854	0.974181		-1.5818	0.0236826	downregulated	-2.0722	0.00477457	downregulated	-0.776417	0.354895		0.518496	0.53266		-1.07005	0.203205
ASPWEDRAFT_176781	-5.98098	8.48505e-05	downregulated	-1.88096	0.24793		-6.18559	1.38738e-05	downregulated	-4.71776	0.00210616	downregulated	-0.558853	0.765271		4.05748	0.00675029	upregulated	-0.574322	0.781802
ASPWEDRAFT_176808	-3.11627	0.00974107	downregulated	-1.50579	0.215176		-2.8202	0.0103779	downregulated	-3.86079	0.000747339	downregulated	-3.40602	0.00408802	downregulated	0.76384	0.557469		-2.9781	0.0140315	downregulated
ASPWEDRAFT_178685	-6.54432	1.65395e-08	downregulated	-2.03491	0.0991849		-5.45075	9.18318e-07	downregulated	-4.3113	0.000271703	downregulated	-0.825375	0.571829		2.61019	0.0314689	upregulated	-0.422175	0.803285
ASPWEDRAFT_22993	-3.87522	6.91115e-07	downregulated	-0.693509	0.434437		-2.54184	0.000752494	downregulated	-2.12105	0.00939684	downregulated	0.741899	0.41875		2.7794	0.000329166	upregulated	0.81133	0.390092
ASPWEDRAFT_25337	-1.0508	5.26597e-05	downregulated	-0.827584	0.000999166		-1.68886	1.74049e-12	downregulated	-1.26757	5.91423e-07	downregulated	-0.728561	0.00803771		-0.611369	0.0226833		-0.649421	0.0224388
ASPWEDRAFT_28307	-2.62129	9.70022e-10	downregulated	-0.584381	0.220253		-1.44955	0.000628972	downregulated	-1.07769	0.0203191	downregulated	0.129761	0.818004		0.328297	0.523646		1.14987	0.0135668	upregulated
ASPWEDRAFT_28422	-4.28892	2.77482e-06	downregulated	-0.879273	0.397976		-1.98151	0.0303209	downregulated	-2.12591	0.0296262	downregulated	-0.787967	0.460967		2.36774	0.0103197	upregulated	-0.753603	0.502568
ASPWEDRAFT_28912	-1.04197	0.00739914	downregulated	-0.578254	0.134817		-1.39928	5.58779e-05	downregulated	-1.42478	0.000100978	downregulated	-0.201173	0.646757		0.360196	0.374424		-0.984447	0.00990677
ASPWEDRAFT_32172	-1.36746	0.030676	downregulated	-0.52665	0.414302		-2.0335	0.000221777	downregulated	-1.25068	0.0408827	downregulated	-2.21393	0.000235136	downregulated	-0.929777	0.12868		-1.53144	0.013729	downregulated
ASPWEDRAFT_32265	-3.3579	2.04506e-15	downregulated	-0.966547	0.0356887		-1.60069	0.000179078	downregulated	-1.23316	0.00797707	downregulated	-0.0260242	0.967005		0.078305	0.893258		-0.0547004	0.933759
ASPWEDRAFT_32621	-2.23582	0.000233436	downregulated	-1.16878	0.059105		-3.20339	8.1541e-09	downregulated	-1.67826	0.00660716	downregulated	0.0807175	0.918074		1.57134	0.00815348	upregulated	0.0787212	0.926346
ASPWEDRAFT_33599	-1.64909	0.0306292	downregulated	-1.37467	0.0555084		-1.90173	0.00470108	downregulated	-2.89317	2.86872e-05	downregulated	-2.16888	0.00219894	downregulated	0.0550788	0.955044		-1.95981	0.00674934	downregulated
ASPWEDRAFT_341527	-4.57595	3.15534e-07	downregulated	-1.18348	0.230387		-2.88156	0.00102803	downregulated	-2.3006	0.0160688	downregulated	0.452675	0.681635		3.33108	0.000170173	upregulated	0.925009	0.388998
ASPWEDRAFT_37201	-1.65526	3.23302e-05	downregulated	-0.881327	0.0303452		-1.7805	1.84709e-06	downregulated	-1.60728	4.89657e-05	downregulated	-0.130734	0.788881		0.400694	0.359769		0.328242	0.494754
ASPWEDRAFT_38290	-3.50198	1.93069e-10	downregulated	-0.725245	0.219749		-1.42501	0.00774887	downregulated	-2.42277	1.14687e-05	downregulated	1.19331	0.0523493		2.26318	4.92323e-05	upregulated	-1.07787	0.135782
ASPWEDRAFT_39245	-2.78781	2.10258e-08	downregulated	-0.520109	0.290314		-1.49948	0.000730996	downregulated	-1.38675	0.00386009	downregulated	-0.508591	0.475903		1.10678	0.0432437	upregulated	0.182191	0.825569
ASPWEDRAFT_39784	-3.56443	3.10964e-07	downregulated	0.75671	0.328146		-2.39528	0.00036688	downregulated	-1.47641	0.0485488	downregulated	1.10755	0.153852		1.77017	0.0132231	upregulated	0.308606	0.749041
ASPWEDRAFT_39881	-2.17386	0.00028031	downregulated	-0.0488873	0.949447		-2.29501	3.64636e-05	downregulated	-1.6303	0.00725079	downregulated	-0.580602	0.390893		0.348919	0.614142		-0.148838	0.856209
ASPWEDRAFT_406132	-1.53075	0.0254	downregulated	-0.438292	0.543545		-1.66867	0.00594006	downregulated	-1.75389	0.00707722	downregulated	-0.489108	0.5181		0.369113	0.620308		-0.937992	0.209186
ASPWEDRAFT_41183	-1.14974	0.0128722	downregulated	-0.9862	0.0160811		-1.02247	0.010845	downregulated	-1.24639	0.00545222	downregulated	0.249854	0.66228		0.263724	0.629975		0.480458	0.396034
ASPWEDRAFT_41325	-5.25569	3.42605e-05	downregulated	-1.94326	0.14678		-3.46018	0.00474318	downregulated	-5.12985	4.68655e-05	downregulated	-0.856841	0.566161		4.05393	0.00106259	upregulated	-0.386691	0.826973
ASPWEDRAFT_41436	-2.01439	0.000134081	downregulated	-0.437881	0.446523		-2.3665	1.37551e-06	downregulated	-1.55163	0.00338699	downregulated	-0.231748	0.726961		0.138986	0.835376		0.572612	0.359738
ASPWEDRAFT_41604	-4.23383	7.19096e-07	downregulated	-0.52306	0.606217		-3.24448	6.49282e-05	downregulated	-2.45446	0.0053557	downregulated	-0.278525	0.803236		2.10687	0.0160709	upregulated	0.569434	0.609959
ASPWEDRAFT_42476	-1.64783	7.3997e-06	downregulated	-0.874197	0.0200643		-1.53323	1.11857e-05	downregulated	-1.37937	0.00019844	downregulated	-0.432375	0.296572		-0.379065	0.352596		-0.216974	0.643054
ASPWEDRAFT_43925	-1.83994	2.84284e-05	downregulated	-0.751742	0.100047		-2.09878	3.27386e-07	downregulated	-1.06576	0.0201612	downregulated	0.918294	0.0465236		0.441643	0.364951		0.977258	0.0360746
ASPWEDRAFT_44349	-2.75719	1.7428e-09	downregulated	-0.957105	0.048181		-2.68934	9.13091e-10	downregulated	-1.23072	0.0120277	downregulated	0.20083	0.733794		0.601621	0.243891		0.73113	0.170291
ASPWEDRAFT_46021	-1.99983	1.90563e-10	downregulated	-0.609158	0.05859		-1.12974	0.000164736	downregulated	-1.65958	1.31303e-07	downregulated	-0.126892	0.769325		0.765762	0.0242099		-0.931121	0.0205237
ASPWEDRAFT_473288	-1.5673	0.00405805	downregulated	-0.388839	0.51516		-2.65128	5.48521e-08	downregulated	-1.85146	0.000408536	downregulated	-0.468909	0.43761		-0.32967	0.588743		0.149645	0.838022
ASPWEDRAFT_47522	-1.65285	0.000177992	downregulated	-0.548241	0.243861		-1.04923	0.0134451	downregulated	-2.31339	4.5409e-08	downregulated	0.163622	0.759496		1.46067	0.000572866	upregulated	-0.884138	0.058428
ASPWEDRAFT_52511	-1.11051	0.000614982	downregulated	-0.748345	0.0188757		-1.14211	0.000140948	downregulated	-1.25107	7.45762e-05	downregulated	-0.231704	0.537978		0.166157	0.660414		-0.0789705	0.860603
ASPWEDRAFT_53881	-1.24957	0.0460145	downregulated	-0.74326	0.206263		-1.80332	0.000953182	downregulated	-1.34117	0.0239724	downregulated	-1.1333	0.0929069		-0.477491	0.481242		-0.702924	0.333967
ASPWEDRAFT_641011	-4.124	2.21306e-05	downregulated	-1.9201	0.0550302		-3.56233	0.000111484	downregulated	-4.54509	2.11246e-06	downregulated	-2.11192	0.0459581	downregulated	1.71161	0.0893605		-2.18312	0.0444636	downregulated
ASPWEDRAFT_64245	-7.03375	1.14231e-05	downregulated	-1.07892	0.269439		-3.08565	0.000708915	downregulated	-2.54604	0.00909268	downregulated	3.64966	0.036597	upregulated	4.10413	0.0128319	upregulated	3.31498	0.0727042
ASPWEDRAFT_702505	-1.31775	0.0192064	downregulated	-0.838707	0.103569		-1.06012	0.0319654	downregulated	-1.8943	0.000584391	downregulated	-0.435767	0.527751		-0.503627	0.439476		-0.773904	0.286217
ASPWEDRAFT_744948	-4.20076	4.34463e-12	downregulated	-0.67875	0.310829		-1.26871	0.0352857	downregulated	-1.45962	0.0229511	downregulated	0.0811766	0.928573		1.68972	0.00866843	upregulated	0.616883	0.436617
ASPWEDRAFT_74802	-1.01432	0.00522251	downregulated	-0.820603	0.0183252		-1.54038	1.92399e-06	downregulated	-1.01725	0.00404528	downregulated	-0.323378	0.415246		-0.166932	0.686648		0.0615472	0.901422
ASPWEDRAFT_74897	-2.64332	0.00183759	downregulated	-1.12604	0.13008		-3.05973	9.64043e-05	downregulated	-1.73179	0.0281047	downregulated	0.197816	0.869052		-0.231393	0.846873		1.12771	0.266053
ASPWEDRAFT_88044	-1.168	0.0247435	downregulated	-0.937998	0.0440032		-1.26466	0.00527402	downregulated	-3.06048	3.99479e-07	downregulated	0.403117	0.497923		0.282901	0.636179		-1.24289	0.0734235
ASPWEDRAFT_171791	-1.22096	5.79041e-05	downregulated	0.931324	0.00136886		-1.08161	0.000149868	downregulated	1.88797	1.89787e-11	upregulated	2.59135	4.71105e-20	upregulated	0.446793	0.164825		2.99931	6.15137e-27	upregulated
ASPWEDRAFT_22956	-2.50733	0.00025206	downregulated	0.709698	0.157552		-1.6509	0.00223726	downregulated	1.3601	0.00502763	upregulated	-1.21861	0.30183		-0.0264603	0.982661		1.04134	0.234407
ASPWEDRAFT_101971	-2.17154	1.17905e-16	downregulated	-0.928206	0.000332972		-1.50929	1.5119e-09	downregulated	-0.623179	0.0260453		0.564764	0.0671002		0.312913	0.328894		0.401867	0.23216
ASPWEDRAFT_102023	-1.11837	0.0138325	downregulated	0.276699	0.572751		-1.45505	0.000311832	downregulated	-0.541995	0.253057		-0.771216	0.0992188		-0.472244	0.317551		-0.222575	0.693491
ASPWEDRAFT_105538	-1.52997	0.00057317	downregulated	-0.680917	0.121658		-1.41848	0.000508998	downregulated	0.0317562	0.957953		-0.515904	0.329798		-0.182382	0.744051		-0.584785	0.289051
ASPWEDRAFT_108263	-1.11993	0.0109856	downregulated	0.201343	0.686113		-1.10027	0.00570242	downregulated	0.496731	0.283233		0.245831	0.620775		-0.230238	0.640595		0.603728	0.191511
ASPWEDRAFT_113022	-3.23865	2.75095e-26	downregulated	-0.910994	0.00418942		-1.9354	7.65393e-11	downregulated	-0.747525	0.0267077		0.208656	0.607613		0.16494	0.684964		0.181391	0.683335
ASPWEDRAFT_113272	-2.98804	1.50395e-07	downregulated	-0.7435	0.235164		-1.59189	0.00463038	downregulated	-1.17164	0.0596102		-0.492405	0.469422		1.05379	0.0799568		0.517238	0.460064
ASPWEDRAFT_115050	-1.27138	0.00118171	downregulated	-0.0400424	0.934015		-1.26503	0.000442431	downregulated	-0.504894	0.228739		-0.40239	0.372234		-0.323314	0.466844		-0.348536	0.469063
ASPWEDRAFT_115942	-1.18656	0.00268831	downregulated	-0.0749428	0.879242		-1.11256	0.00227858	downregulated	-0.22355	0.633988		0.214605	0.635986		0.244269	0.577733		0.446587	0.303439
ASPWEDRAFT_117952	-1.00735	0.000831333	downregulated	-0.299759	0.326859		-1.2582	4.44175e-06	downregulated	0.0756587	0.838545		0.424723	0.208658		-0.728268	0.028051		1.19202	7.32578e-05	upregulated
ASPWEDRAFT_119423	-2.63294	0.000218011	downregulated	0.445048	0.532612		-1.7343	0.00565997	downregulated	-0.497167	0.505953		0.807621	0.341048		1.25061	0.097803		1.35364	0.0922651
ASPWEDRAFT_121201	-1.40637	0.0189691	downregulated	0.471151	0.435711		-2.73442	4.06568e-07	downregulated	-0.816412	0.177444		0.45848	0.485526		0.549057	0.378188		0.775555	0.222434
ASPWEDRAFT_121258	-2.8265	0.000740091	downregulated	0.478257	0.52113		-1.43259	0.0355301	downregulated	-0.0204701	0.984492		0.424015	0.710192		0.061264	0.964145		0.259501	0.850154
ASPWEDRAFT_134827	-1.54376	1.1282e-05	downregulated	-0.715347	0.0495998		-1.15458	0.000637225	downregulated	-0.651072	0.0882474		-0.0140257	0.976735		0.885579	0.0121376		0.380034	0.355592
ASPWEDRAFT_137401	-1.06657	0.00236936	downregulated	-0.387122	0.285295		-1.52525	1.4662e-06	downregulated	-0.662828	0.0647655		-0.129352	0.760616		0.156089	0.704971		-0.0697101	0.886897
ASPWEDRAFT_138298	-1.94619	1.67796e-07	downregulated	-0.980425	0.00394509		-1.56448	3.28644e-06	downregulated	-0.100528	0.820855		0.470025	0.318343		0.332857	0.480037		0.69881	0.131197
ASPWEDRAFT_139929	-6.84484	2.03007e-06	downregulated	-1.7248	0.14678		-3.9452	0.000354129	downregulated	-2.24654	0.0641571		2.89863	0.0673884		3.85597	0.00878957	upregulated	1.59611	0.396515
ASPWEDRAFT_144015	-1.06793	0.0204027	downregulated	0.266569	0.587043		-1.87414	3.53327e-06	downregulated	-0.131481	0.809759		-0.11393	0.836167		-0.799648	0.0805607		-0.155877	0.797189
ASPWEDRAFT_144095	-2.29774	8.35717e-10	downregulated	-0.779039	0.0520517		-1.27391	0.000611784	downregulated	-0.749393	0.0731139		0.384655	0.388107		0.657949	0.105118		0.783551	0.0607621
ASPWEDRAFT_144532	-1.3438	0.0237976	downregulated	-0.278477	0.672769		-1.97985	0.00014287	downregulated	-0.43749	0.49886		-0.678525	0.272397		-0.0108146	0.989411		0.0109555	0.992988
ASPWEDRAFT_144557	-2.04093	1.17389e-05	downregulated	0.164345	0.778929		-1.75053	7.78962e-05	downregulated	0.0272283	0.969186		1.38713	0.00343607	upregulated	0.707229	0.152331		1.61494	0.000614142	upregulated
ASPWEDRAFT_146540	-2.61541	6.2863e-14	downregulated	-0.696354	0.0620401		-1.6719	8.79777e-07	downregulated	-0.230687	0.602044		0.177334	0.701151		0.458914	0.258989		0.814836	0.0419963
ASPWEDRAFT_148134	-1.2478	0.0278542	downregulated	-0.0647356	0.923513		-1.26944	0.0119035	downregulated	-0.556528	0.351432		-0.476894	0.425092		0.0757771	0.911523		0.123735	0.864271
ASPWEDRAFT_149298	-3.19011	7.18262e-16	downregulated	-0.296762	0.532106		-1.36802	0.000462355	downregulated	0.3443	0.476027		0.238422	0.647048		-0.75868	0.101175		1.34908	0.00194294	upregulated
ASPWEDRAFT_166548	-2.8511	1.34013e-19	downregulated	-0.757229	0.0284013		-2.2554	3.9035e-13	downregulated	0.491697	0.191369		1.64337	5.99877e-07	upregulated	0.528248	0.13657		2.50379	4.62911e-15	upregulated
ASPWEDRAFT_166658	-2.4997	1.03817e-05	downregulated	0.0463115	0.949255		-2.89478	5.52116e-08	downregulated	-0.554744	0.389484		-0.543922	0.432954		-0.666515	0.309646		-0.291527	0.713788
ASPWEDRAFT_166891	-2.96605	0.0210456	downregulated	-1.51534	0.127159		-2.59967	0.0123794	downregulated	-1.53128	0.155803		1.94297	0.149212		2.40521	0.0515512		-0.383028	0.866927
ASPWEDRAFT_168013	-6.50587	6.16917e-10	downregulated	-0.382274	0.777107		-3.12896	0.00256124	downregulated	-1.64216	0.167105		1.30984	0.287611		4.18814	7.47477e-05	upregulated	1.0195	0.439476
ASPWEDRAFT_168015	-3.36287	0.00954958	downregulated	-0.0578123	0.969741		-2.75545	0.0193179	downregulated	-1.57367	0.242103		0.303868	0.847421		3.21579	0.00779958	upregulated	0.31683	0.855385
ASPWEDRAFT_168158	-1.78025	3.30345e-06	downregulated	-0.926176	0.0140085		-1.83308	3.24293e-07	downregulated	-0.643045	0.11504		0.142862	0.774921		-0.158135	0.75101		0.786671	0.0680733
ASPWEDRAFT_169780	-2.96203	9.29401e-07	downregulated	-0.967353	0.133992		-1.83052	0.00188323	downregulated	-1.01433	0.129647		1.76176	0.00470714	upregulated	1.24115	0.0473724	upregulated	1.89417	0.00243547	upregulated
ASPWEDRAFT_169791	-1.72034	5.27553e-15	downregulated	-0.553492	0.0189281		-1.22779	1.43156e-08	downregulated	-0.125612	0.666969		0.461374	0.0619694		0.181935	0.497336		0.64746	0.00752352
ASPWEDRAFT_169867	-5.39247	0.00295194	downregulated	-1.63961	0.205172		-2.60711	0.0477954	downregulated	-2.00545	0.156983		2.12275	0.365086		2.7265	0.177521		2.47599	0.293854
ASPWEDRAFT_170590	-1.78791	0.00018344	downregulated	-0.808527	0.0530999		-1.20067	0.00331313	downregulated	0.314643	0.497904		0.408296	0.512451		0.627806	0.256019		1.2602	0.0182783	upregulated
ASPWEDRAFT_171048	-1.81245	0.000996964	downregulated	-0.0885037	0.89223		-1.10633	0.0290116	downregulated	-0.924561	0.0981207		-0.160479	0.824174		1.05949	0.0571797		-0.0665774	0.938597
ASPWEDRAFT_171272	-2.86511	3.31171e-05	downregulated	-0.657269	0.384897		-2.44079	0.000175646	downregulated	-0.413924	0.620392		0.646395	0.418284		1.3028	0.0667823		1.25493	0.0958403
ASPWEDRAFT_172608	-6.84053	7.5105e-05	downregulated	0.448532	0.80329		-3.32981	0.0181963	downregulated	-0.420147	0.82292		2.72897	0.151348		5.89985	0.000411731	upregulated	3.47217	0.062891
ASPWEDRAFT_173151	-2.21471	0.000837212	downregulated	0.756236	0.257196		-1.26359	0.0415112	downregulated	0.363623	0.634914		1.01963	0.151749		1.33696	0.0436205	upregulated	1.7786	0.00820911	upregulated
ASPWEDRAFT_174093	-3.95713	1.11101e-06	downregulated	-0.180494	0.864071		-2.099	0.00751257	downregulated	-1.09259	0.226976		1.02435	0.271416		3.26347	4.18933e-05	upregulated	1.07768	0.256762
ASPWEDRAFT_174160	-2.27451	0.00127222	downregulated	0.902355	0.206634		-1.86678	0.00427961	downregulated	-0.327924	0.698938		0.486494	0.551987		1.7154	0.0122231	upregulated	0.89297	0.255721
ASPWEDRAFT_174287	-1.71842	0.00039654	downregulated	0.832331	0.0832669		-1.0622	0.0205042	downregulated	-0.185491	0.757882		0.520193	0.34097		0.831502	0.0943558		1.25424	0.0117662	upregulated
ASPWEDRAFT_174973	-1.96862	1.67026e-06	downregulated	-0.163621	0.752214		-1.00072	0.0135014	downregulated	-0.366063	0.454936		0.729945	0.102672		0.525992	0.243254		1.12647	0.00919682	upregulated
ASPWEDRAFT_175911	-5.29188	0.0212476	downregulated	1.72514	0.34064		-4.65747	0.0252454	downregulated	0.719576	0.734377		0	1		4.83497	0.0243967	upregulated	2.46102	0.379272
ASPWEDRAFT_176441	-1.59146	8.57459e-15	downregulated	-0.842236	5.54799e-05		-1.22495	1.06342e-09	downregulated	-0.508473	0.025485		1.07571	4.5111e-07	upregulated	0.648772	0.00265392		1.88449	2.17773e-20	upregulated
ASPWEDRAFT_176501	-2.58051	1.37455e-11	downregulated	-0.467634	0.239003		-1.15373	0.00128758	downregulated	0.415659	0.321691		1.77049	1.102e-05	upregulated	0.924056	0.0282439		2.47055	2.58401e-10	upregulated
ASPWEDRAFT_176824	-6.70045	8.40366e-05	downregulated	1.01669	0.612737		-3.42993	0.0393592	downregulated	-2.16746	0.253835		1.02158	0.612778		6.90997	2.01853e-05	upregulated	1.4672	0.469149
ASPWEDRAFT_177083	-2.54795	4.6948e-05	downregulated	0.939027	0.145844		-1.42761	0.0176925	downregulated	-0.379725	0.615275		0.252903	0.744777		1.33649	0.0354809	upregulated	0.759761	0.294133
ASPWEDRAFT_177849	-2.21176	0.0150859	downregulated	-0.868365	0.337431		-1.79411	0.0283339	downregulated	-1.29241	0.156038		-0.0590276	0.960991		1.07702	0.242046		-0.125641	0.922763
ASPWEDRAFT_179685	-5.54707	9.35424e-05	downregulated	0.548091	0.755544		-3.63897	0.00780237	downregulated	-2.01274	0.199915		0.881646	0.59571		4.36864	0.00151825	upregulated	1.01392	0.558935
ASPWEDRAFT_180214	-2.18923	5.51755e-09	downregulated	-0.979843	0.00397522		-1.51084	6.41713e-06	downregulated	-0.1379	0.752005		0.101668	0.858638		-1.27753	0.0124667	downregulated	0.962221	0.0324086
ASPWEDRAFT_181920	-1.66229	0.000594674	downregulated	0.599721	0.190346		-1.10515	0.011604	downregulated	0.663038	0.162523		0.746735	0.16602		0.636824	0.227769		0.754723	0.17726
ASPWEDRAFT_182704	-3.49309	0.000721302	downregulated	-0.455998	0.711257		-2.95782	0.0021788	downregulated	-1.92282	0.0739952		0.153432	0.908519		2.4142	0.0165364	upregulated	0.601567	0.637782
ASPWEDRAFT_183462	-1.91801	0.000109307	downregulated	-0.0781467	0.892843		-1.57638	0.000464865	downregulated	0.0941788	0.880582		1.93949	8.19149e-05	upregulated	1.30038	0.00940214	upregulated	1.88744	0.000173061	upregulated
ASPWEDRAFT_183896	-1.27076	0.000285507	downregulated	-0.668671	0.0399173		-1.0959	0.000497966	downregulated	-0.321867	0.386222		-0.422769	0.35693		-1.00312	0.0175742	downregulated	-1.11419	0.0242302	downregulated
ASPWEDRAFT_184012	-1.4245	0.00114654	downregulated	-0.882921	0.0384547		-1.08752	0.00737685	downregulated	-0.415699	0.3901		0.405091	0.415246		0.448993	0.343962		1.3724	0.00162564	upregulated
ASPWEDRAFT_184170	-1.0406	0.014126	downregulated	0.300656	0.50504		-1.8729	4.76688e-07	downregulated	-0.391063	0.392292		0.807753	0.0515544		0.473412	0.268433		0.986674	0.0169135
ASPWEDRAFT_186797	-5.21681	0.00150398	downregulated	0.811447	0.519769		-3.04388	0.00826243	downregulated	-0.406321	0.775425		2.63981	0.140052		5.00762	0.00131716	upregulated	3.8607	0.0228038	upregulated
ASPWEDRAFT_186906	-2.38612	0.00584448	downregulated	-1.00406	0.19932		-2.11943	0.0049339	downregulated	-1.1762	0.15348		0.0494169	0.969044		-0.196283	0.869169		-0.0449921	0.97794
ASPWEDRAFT_187532	-1.13725	0.000109889	downregulated	-0.509945	0.0636724		-1.16994	1.11204e-05	downregulated	-0.26307	0.402474		-0.187326	0.64229		-0.471559	0.18723		0.184546	0.666863
ASPWEDRAFT_192589	-4.36013	1.28065e-22	downregulated	-0.75298	0.129592		-2.64063	1.60356e-09	downregulated	-0.678733	0.195887		1.82515	0.000144205	upregulated	1.3392	0.0052917	upregulated	2.29318	1.27816e-06	upregulated
ASPWEDRAFT_198249	-1.28174	0.00702632	downregulated	-0.461752	0.353024		-1.62141	0.000144062	downregulated	-0.805928	0.0972401		-1.3526	0.00294505	downregulated	-0.224903	0.673095		-0.899237	0.0613648
ASPWEDRAFT_23898	-1.84614	1.26585e-07	downregulated	-0.371605	0.328642		-1.55208	2.60731e-06	downregulated	-0.773622	0.0357756		-0.456866	0.287652		-0.00633917	0.991464		-0.751835	0.0815221
ASPWEDRAFT_24090	-1.20822	6.42177e-10	downregulated	-0.888511	4.92629e-06		-1.25494	2.2593e-11	downregulated	-0.228991	0.327214		0.775813	0.000123509		0.112453	0.641122		0.94633	2.2668e-06
ASPWEDRAFT_24862	-2.41714	2.35845e-11	downregulated	-0.631449	0.109292		-1.50801	2.22332e-05	downregulated	-0.621704	0.130633		0.207948	0.651764		1.37594	0.000196753	upregulated	0.130014	0.806835
ASPWEDRAFT_25888	-1.64497	0.00886786	downregulated	0.155425	0.811574		-2.14492	0.000181066	downregulated	0.372826	0.549889		0.162822	0.846848		-1.51089	0.0629129		0.0246377	0.984706
ASPWEDRAFT_27109	-2.27272	3.98869e-08	downregulated	-0.0658225	0.905151		-1.37324	0.000722871	downregulated	-0.422332	0.392078		0.395159	0.420883		1.24036	0.00323107	upregulated	0.430908	0.393253
ASPWEDRAFT_27161	-5.62434	0.000220339	downregulated	0.736212	0.660874		-3.41681	0.0125148	downregulated	0.0942613	0.962413		1.20958	0.502504		3.65711	0.0151758	upregulated	1.59681	0.378709
ASPWEDRAFT_27298	-1.27403	8.8356e-08	downregulated	-0.0765894	0.794282		-1.33773	2.38068e-09	downregulated	0.0394468	0.904715		0.539193	0.0419432		0.092446	0.770065		1.20275	1.02501e-06	upregulated
ASPWEDRAFT_28142	-2.0809	1.38222e-06	downregulated	-0.814261	0.0635299		-1.49902	0.000240192	downregulated	-0.57779	0.224566		0.491074	0.335016		1.01309	0.023679	upregulated	1.11534	0.0170216	upregulated
ASPWEDRAFT_28451	-1.37062	0.00324328	downregulated	0.591154	0.192112		-1.87195	9.22928e-06	downregulated	0.349151	0.491848		1.02122	0.0294305	upregulated	1.10313	0.0141512	upregulated	1.92107	1.39957e-05	upregulated
ASPWEDRAFT_285631	-1.0855	0.0033703	downregulated	0.325175	0.357991		-1.49526	8.22571e-06	downregulated	0.327975	0.384154		0.0416239	0.936287		-0.854965	0.0426667		0.139555	0.797869
ASPWEDRAFT_28814	-1.01406	0.00379847	downregulated	-0.537485	0.125758		-1.28946	4.43714e-05	downregulated	-0.171797	0.682389		-0.306866	0.424429		-0.23697	0.53677		0.662195	0.0638892
ASPWEDRAFT_290354	-2.01889	1.24167e-10	downregulated	-0.609394	0.0739799		-1.29771	2.78517e-05	downregulated	-0.379752	0.310948		0.239352	0.533568		0.116583	0.773902		1.04013	0.00178704	upregulated
ASPWEDRAFT_292279	-1.96047	2.50352e-13	downregulated	-0.519978	0.0707344		-1.11987	2.02554e-05	downregulated	-0.664097	0.0229477		-0.0263315	0.946808		-0.0311223	0.937638		0.710314	0.0190766
ASPWEDRAFT_294248	-1.48497	8.25545e-05	downregulated	0.177064	0.699295		-1.16909	0.00110262	downregulated	0.744723	0.0615921		1.68499	4.24304e-06	upregulated	0.446591	0.270363		2.14262	2.67793e-09	upregulated
ASPWEDRAFT_31183	-2.30836	2.0778e-05	downregulated	-1.00947	0.0566786		-1.55652	0.00188839	downregulated	-0.693746	0.228692		-0.271304	0.709091		0.762118	0.202627		0.410931	0.570872
ASPWEDRAFT_31781	-2.58172	0.000254816	downregulated	0.00951858	0.992325		-1.64058	0.0155251	downregulated	-1.30241	0.0816239		-0.14631	0.869202		1.42557	0.0432999	upregulated	-0.225095	0.814956
ASPWEDRAFT_32389	-1.93213	0.00135444	downregulated	-0.0679815	0.928186		-1.886	0.000724468	downregulated	-0.931065	0.145144		0.806047	0.207634		1.23939	0.0360933	upregulated	0.881427	0.172991
ASPWEDRAFT_33450	-1.14627	0.0153027	downregulated	-0.275353	0.586642		-1.84647	1.05256e-05	downregulated	0.135604	0.808287		0.6707	0.166922		0.240966	0.650252		1.10799	0.0170586	upregulated
ASPWEDRAFT_33451	-1.65331	0.000405069	downregulated	0.181501	0.729875		-1.03423	0.0157608	downregulated	0.349887	0.490577		0.440001	0.426792		0.716339	0.149871		0.693145	0.201006
ASPWEDRAFT_341528	-4.87752	9.63199e-12	downregulated	-0.424449	0.637664		-2.8309	6.76665e-05	downregulated	-1.45255	0.0717634		1.72007	0.0275191	upregulated	3.16918	1.09872e-05	upregulated	1.90246	0.0151836	upregulated
ASPWEDRAFT_34310	-3.269	6.7664e-10	downregulated	-0.298879	0.582361		-2.2777	8.16891e-07	downregulated	-0.395621	0.472695		1.96642	0.000592945	upregulated	1.79157	0.00137923	upregulated	1.91206	0.00114642	upregulated
ASPWEDRAFT_35440	-2.72097	2.74838e-08	downregulated	-0.235742	0.691256		-1.46715	0.00179349	downregulated	-0.253272	0.678201		0.755707	0.181544		1.85354	0.000170173	upregulated	1.2301	0.0231942	upregulated
ASPWEDRAFT_35510	-1.47102	2.90863e-08	downregulated	-0.444379	0.119653		-1.6962	1.6413e-11	downregulated	-0.783594	0.00523318		-0.223446	0.486909		-0.501321	0.0794137		-0.315351	0.327412
ASPWEDRAFT_35891	-1.85784	0.0283064	downregulated	0.0452444	0.958664		-2.4472	0.00139621	downregulated	-0.39869	0.643195		0.0420932	0.972258		-0.102047	0.930494		0.629466	0.55325
ASPWEDRAFT_36364	-4.44571	3.80023e-21	downregulated	-0.0842066	0.892224		-1.24994	0.00718955	downregulated	-0.231947	0.702126		2.00145	8.71454e-05	upregulated	2.31745	2.10044e-06	upregulated	2.00655	0.000100527	upregulated
ASPWEDRAFT_36367	-2.24642	5.71973e-08	downregulated	-0.0510039	0.923656		-1.75345	7.80986e-06	downregulated	-0.178084	0.735327		1.59823	0.00018694	upregulated	0.723674	0.110097		1.34991	0.0022555	upregulated
ASPWEDRAFT_37124	-1.63037	0.00996184	downregulated	-0.991086	0.107486		-1.87841	0.000949035	downregulated	-0.348125	0.63201		-0.193761	0.795825		0.389052	0.574539		0.257203	0.748267
ASPWEDRAFT_37610	-1.50227	0.00522251	downregulated	-0.000452167	1		-1.10613	0.0275535	downregulated	-0.876235	0.114036		-0.487409	0.404202		0.552522	0.321077		-0.446029	0.466886
ASPWEDRAFT_37856	-2.73424	0.000585288	downregulated	-1.29376	0.0531001		-2.69578	0.00012431	downregulated	0.0201458	0.983864		0.342496	0.756349		0.968092	0.285571		2.41043	0.0032959	upregulated
ASPWEDRAFT_37959	-1.89127	0.000266545	downregulated	-0.497929	0.369613		-2.13527	8.45427e-06	downregulated	-0.329723	0.590056		-0.487885	0.423736		-0.00498036	0.996525		0.27954	0.678396
ASPWEDRAFT_38802	-2.74414	0.000164959	downregulated	0.352593	0.688051		-1.73956	0.0129901	downregulated	-0.131317	0.896591		1.13925	0.142702		1.78798	0.0127868	upregulated	1.49832	0.049839	upregulated
ASPWEDRAFT_40158	-5.14935	2.34493e-33	downregulated	-0.833775	0.076101		-2.09332	7.72863e-07	downregulated	0.411307	0.438106		0.716613	0.167613		1.73944	0.000138977	upregulated	1.37032	0.00494371	upregulated
ASPWEDRAFT_40584	-1.82854	1.80789e-08	downregulated	-0.836786	0.0126979		-2.05591	2.9548e-11	downregulated	-0.797309	0.0228794		0.259482	0.509988		0.499382	0.159915		1.12613	0.000925166	upregulated
ASPWEDRAFT_40593	-2.06943	5.712e-08	downregulated	-0.724612	0.0735349		-2.82217	5.15807e-15	downregulated	-0.488019	0.268316		0.673601	0.110636		-0.0982991	0.843372		1.78772	3.72258e-06	upregulated
ASPWEDRAFT_41401	-3.8265	1.72598e-15	downregulated	-0.688493	0.193744		-1.36137	0.00450037	downregulated	0.324337	0.591783		1.24259	0.0205248	upregulated	1.11674	0.0336893	upregulated	2.06723	5.74038e-05	upregulated
ASPWEDRAFT_41422	-1.61504	0.00896253	downregulated	0.349918	0.604779		-1.67455	0.00264387	downregulated	-0.616874	0.350291		-1.1416	0.0824548		-0.585461	0.379574		-0.913064	0.187791
ASPWEDRAFT_41600	-3.07317	0.00859372	downregulated	-0.4481	0.629048		-2.08589	0.0169532	downregulated	-1.01591	0.279036		1.02415	0.477556		0.299387	0.856099		2.48584	0.0420409	upregulated
ASPWEDRAFT_41601	-1.05728	0.000239912	downregulated	-0.304814	0.318207		-1.69489	1.43558e-10	downregulated	-0.391359	0.209643		-0.0871438	0.812228		-0.372438	0.237629		-0.274919	0.440169
ASPWEDRAFT_42470	-2.96963	3.21988e-06	downregulated	-0.184795	0.758337		-1.57582	0.00167073	downregulated	0.00950984	0.991664		0.620049	0.473974		-0.608832	0.528188		-0.107495	0.931005
ASPWEDRAFT_42610	-2.92635	1.60056e-05	downregulated	0.361835	0.572701		-2.21337	0.000131179	downregulated	0.678456	0.271764		1.82934	0.0123255	upregulated	1.26335	0.0912392		2.9423	1.84305e-05	upregulated
ASPWEDRAFT_42662	-3.93269	1.0446e-15	downregulated	-0.697887	0.182597		-1.22853	0.0103059	downregulated	-0.846149	0.113429		1.31924	0.0168075	upregulated	2.40858	1.55565e-06	upregulated	1.17877	0.0395941	upregulated
ASPWEDRAFT_42886	-2.41839	7.39679e-12	downregulated	-0.675449	0.0558157		-2.28122	7.16663e-12	downregulated	-0.217003	0.605367		0.524337	0.228897		-0.555864	0.211373		0.978655	0.0171765
ASPWEDRAFT_42961	-1.44156	0.0210917	downregulated	0.0939413	0.894921		-1.17036	0.0356578	downregulated	-0.733378	0.24702		-0.660493	0.354918		0.541842	0.410314		-0.0739791	0.934561
ASPWEDRAFT_43585	-2.20909	0.00132694	downregulated	0.509953	0.451698		-1.61934	0.00826458	downregulated	-0.341235	0.653955		0.735397	0.357335		1.20764	0.0884022		1.36915	0.0662222
ASPWEDRAFT_44386	-3.10873	0.00492271	downregulated	-1.32988	0.241267		-3.17714	0.00164427	downregulated	-1.56117	0.179658		0.555537	0.65839		3.28775	0.0013581	upregulated	0.784272	0.541743
ASPWEDRAFT_44846	-3.23171	7.02755e-11	downregulated	-0.845501	0.0758344		-1.18946	0.00802924	downregulated	-0.0382934	0.954018		0.453833	0.492234		0.507309	0.416895		1.41794	0.0130215	upregulated
ASPWEDRAFT_44956	-3.10641	1.45049e-06	downregulated	-0.162781	0.841355		-1.56466	0.0114397	downregulated	-1.11101	0.106278		0.101969	0.909578		1.70326	0.00967348	upregulated	0.375398	0.667416
ASPWEDRAFT_45321	-1.236	0.00193133	downregulated	-0.932317	0.0158983		-1.39564	0.000128572	downregulated	-0.540503	0.20579		-0.393902	0.371194		-0.174281	0.709479		0.127143	0.8116
ASPWEDRAFT_46007	-1.56575	0.00134142	downregulated	-0.153325	0.796189		-2.57544	5.24434e-09	downregulated	-0.70386	0.177479		0.203584	0.724785		0.121885	0.836659		0.936511	0.0645549
ASPWEDRAFT_46415	-1.25032	0.022154	downregulated	-0.214315	0.727752		-1.01664	0.0399216	downregulated	0.795536	0.143092		2.10302	2.06354e-05	upregulated	0.437417	0.442425		2.26831	4.37447e-06	upregulated
ASPWEDRAFT_47309	-1.20874	0.000114429	downregulated	-0.82	0.00835794		-1.23142	2.67321e-05	downregulated	-0.936309	0.00323814		-0.429009	0.207		0.080119	0.836153		-0.276804	0.455246
ASPWEDRAFT_474326	-1.97908	0.00155076	downregulated	0.265846	0.664878		-1.28595	0.0162997	downregulated	0.683833	0.227803		0.892502	0.211821		-0.4401	0.599386		1.43959	0.0338354	upregulated
ASPWEDRAFT_48463	-1.83647	0.0324956	downregulated	0.440888	0.618551		-1.56468	0.0389362	downregulated	-0.363262	0.702922		-0.642429	0.51915		1.20735	0.14617		0.237886	0.83682
ASPWEDRAFT_489922	-1.84426	0.0206694	downregulated	0.157319	0.868423		-1.59174	0.0269317	downregulated	-0.73553	0.38561		-0.32163	0.724135		0.959394	0.22328		0.00963079	0.995651
ASPWEDRAFT_49669	-3.32801	1.03817e-05	downregulated	-0.669164	0.435805		-1.87178	0.0114788	downregulated	-1.23051	0.139457		-1.05127	0.206698		1.59128	0.0386911	upregulated	-0.494414	0.602553
ASPWEDRAFT_50976	-1.32496	0.000101489	downregulated	-0.536894	0.103838		-1.09782	0.000415569	downregulated	0.618261	0.0613372		0.354475	0.390505		-0.567998	0.156555		0.895801	0.0161839
ASPWEDRAFT_51454	-1.63586	4.22252e-05	downregulated	0.378531	0.370483		-1.35889	0.00026487	downregulated	0.387491	0.382308		0.37682	0.425821		0.412508	0.360632		1.02127	0.0166005	upregulated
ASPWEDRAFT_51457	-2.22761	1.33127e-09	downregulated	-0.303419	0.461331		-1.02058	0.00393474	downregulated	0.498225	0.217431		0.432287	0.337543		-0.00828998	0.989322		0.557405	0.216483
ASPWEDRAFT_51566	-5.96659	1.66037e-16	downregulated	-1.07511	0.17298		-3.3818	1.22999e-06	downregulated	-1.13142	0.166941		0.96869	0.270563		2.8627	0.000139013	upregulated	1.28647	0.137885
ASPWEDRAFT_52085	-2.75496	2.95726e-17	downregulated	-0.978505	0.00377372		-1.61669	4.30635e-07	downregulated	-0.552535	0.138805		-0.040008	0.933688		-0.2713	0.508863		0.38032	0.36301
ASPWEDRAFT_531814	-2.09212	1.47543e-05	downregulated	-0.77872	0.0916704		-1.34855	0.00202766	downregulated	-0.10475	0.861219		0.528688	0.372727		0.668932	0.22093		1.49133	0.00396767	upregulated
ASPWEDRAFT_54052	-1.20359	0.000126617	downregulated	-0.572461	0.0771452		-1.33973	4.53476e-06	downregulated	-0.612759	0.0666599		0.311343	0.377176		0.239373	0.498549		0.715757	0.0281347
ASPWEDRAFT_54205	-3.76853	0.00142952	downregulated	-1.41091	0.214463		-2.10137	0.0474646	downregulated	-2.06382	0.073839		0.117383	0.943907		3.11014	0.00628567	upregulated	0.546073	0.737185
ASPWEDRAFT_55317	-5.44008	8.70551e-15	downregulated	0.0254945	0.977962		-1.39455	0.0389972	downregulated	0.762254	0.329634		2.17003	0.00493038	upregulated	2.54163	0.00055806	upregulated	1.93928	0.0152326	upregulated
ASPWEDRAFT_60916	-1.9787	1.05945e-05	downregulated	0.128705	0.803727		-1.16253	0.00458222	downregulated	0.477353	0.305946		1.48663	0.00143381	upregulated	1.16815	0.0119301	upregulated	1.92321	2.7175e-05	upregulated
ASPWEDRAFT_62525	-1.03453	0.0372737	downregulated	-0.301013	0.563787		-1.30322	0.00261363	downregulated	-0.0149387	0.983534		0.0609601	0.919488		0.243028	0.651886		0.751202	0.131635
ASPWEDRAFT_62778	-1.83947	2.54489e-06	downregulated	-0.668928	0.0571764		-1.0855	0.0014069	downregulated	-0.387085	0.327783		-0.111309	0.853723		0.899604	0.0353899		1.46575	0.00056421	upregulated
ASPWEDRAFT_66733	-1.98873	0.00923265	downregulated	-0.236176	0.764153		-2.27968	0.000874015	downregulated	-0.107108	0.904715		1.79542	0.0176739	upregulated	1.15582	0.13933		2.16704	0.00383939	upregulated
ASPWEDRAFT_689518	-1.72018	1.42728e-08	downregulated	-0.834381	0.00737054		-1.8228	3.02259e-10	downregulated	-0.317775	0.380352		0.374864	0.287099		-0.543093	0.0994122		0.757617	0.0216059
ASPWEDRAFT_69007	-1.14225	0.00482218	downregulated	0.0774089	0.867598		-1.07498	0.00294177	downregulated	-0.513442	0.213816		0.386045	0.408906		0.426919	0.332489		0.7817	0.0741424
ASPWEDRAFT_691770	-3.01353	7.08694e-05	downregulated	0.649253	0.415917		-1.8625	0.00810372	downregulated	-0.404378	0.649589		-0.303062	0.761756		1.12293	0.166594		0.916443	0.308825
ASPWEDRAFT_69899	-2.56546	2.18773e-07	downregulated	0.271325	0.649118		-1.31485	0.00641017	downregulated	0.00999552	0.991284		0.81419	0.143347		1.01529	0.0519497		1.11064	0.0416758	upregulated
ASPWEDRAFT_71290	-4.19227	1.51651e-09	downregulated	-1.30868	0.0637785		-1.95712	0.00302551	downregulated	-0.602907	0.452944		-0.204458	0.83443		0.669788	0.422647		-0.0168366	0.992122
ASPWEDRAFT_71988	-3.28372	4.6806e-05	downregulated	0.178014	0.844909		-3.52066	2.60038e-06	downregulated	-0.675955	0.41884		0.109927	0.927882		-1.13358	0.292		0.220282	0.863754
ASPWEDRAFT_735872	-3.49282	1.60808e-10	downregulated	0.742986	0.191943		-1.44068	0.00572203	downregulated	-0.265356	0.694626		1.08729	0.0817531		2.24651	5.27508e-05	upregulated	1.49778	0.014339	upregulated
ASPWEDRAFT_743039	-1.7907	0.0101077	downregulated	0.650022	0.348199		-1.3929	0.0272468	downregulated	-0.368277	0.639442		-0.099221	0.912022		0.530743	0.482889		0.45977	0.585517
ASPWEDRAFT_99274	-1.03123	0.0215868	downregulated	-0.582513	0.188133		-1.28588	0.00119423	downregulated	-0.452344	0.343159		-1.1086	0.00846527	downregulated	-0.284177	0.548886		-0.893971	0.0402753
ASPWEDRAFT_181498	-1.0741	0.0131345	downregulated	-0.53564	0.216454		1.18214	0.00222979	upregulated	-2.17128	3.52056e-08	downregulated	-1.13071	0.00653158	downregulated	0.847113	0.0384534		-2.17167	9.49137e-08	downregulated
ASPWEDRAFT_357263	-1.04656	0.0179735	downregulated	-0.00749472	0.989375		1.69141	6.56509e-06	upregulated	-1.14646	0.00678068	downregulated	-0.610371	0.187614		0.757803	0.0728894		0.251512	0.633202
ASPWEDRAFT_41305	-1.61226	6.01493e-05	downregulated	0.995561	0.0113509		2.0718	1.06212e-08	upregulated	-1.11455	0.00653474	downregulated	1.53322	0.000113497	upregulated	2.9948	3.94505e-16	upregulated	-0.0894747	0.877208
ASPWEDRAFT_43359	-1.30052	0.00538116	downregulated	-0.442478	0.353419		1.26258	0.00197952	upregulated	-1.26706	0.00547944	downregulated	1.97635	5.25331e-06	upregulated	3.14253	1.06859e-14	upregulated	-0.602357	0.272326
ASPWEDRAFT_47875	-1.50323	0.00461295	downregulated	0.840361	0.109623		1.00507	0.0426287	upregulated	-1.1589	0.0288788	downregulated	-0.0677368	0.919271		1.14762	0.0237983	upregulated	-0.394604	0.527228
ASPWEDRAFT_67338	-1.00908	0.034332	downregulated	0.259851	0.611119		2.36529	2.0408e-09	upregulated	-1.5277	0.000508274	downregulated	0.752697	0.10472		2.84565	1.20013e-12	upregulated	-1.038	0.0286486	downregulated
ASPWEDRAFT_101185	-1.98252	0.00157715	downregulated	0.790555	0.226552		1.40123	0.0181959	upregulated	1.87978	0.00234997	upregulated	0.549287	0.427255		1.28942	0.0354693	upregulated	0.556492	0.438842
ASPWEDRAFT_132880	-1.6515	0.0338116	downregulated	0.265551	0.721379		1.40718	0.0140646	upregulated	2.66349	2.87127e-06	upregulated	3.16386	3.4541e-06	upregulated	1.72502	0.0162783	upregulated	3.78043	1.74636e-08	upregulated
ASPWEDRAFT_160173	-3.77588	1.34202e-07	downregulated	0.520817	0.371104		1.30627	0.00979875	upregulated	1.09997	0.0479223	upregulated	3.67894	3.45712e-07	upregulated	2.97513	3.62905e-05	upregulated	1.10826	0.245621
ASPWEDRAFT_168246	-3.06793	2.66497e-06	downregulated	0.927391	0.0166216		1.78156	3.95972e-07	upregulated	1.23297	0.00163835	upregulated	1.24621	0.123439		2.06621	0.00259744	upregulated	-0.236918	0.862282
ASPWEDRAFT_170965	-2.16587	0.00384599	downregulated	0.963423	0.203848		1.70346	0.0133229	upregulated	1.99911	0.00598071	upregulated	1.51226	0.0424501	upregulated	0.349752	0.683646		1.76701	0.0177135	upregulated
ASPWEDRAFT_22816	-2.32233	8.96142e-08	downregulated	0.837518	0.0542584		1.29188	0.00139583	upregulated	1.38465	0.00119977	upregulated	1.72283	0.000119224	upregulated	2.51721	2.01046e-09	upregulated	0.727426	0.156272
ASPWEDRAFT_367930	-1.09185	0.0056341	downregulated	-0.449828	0.249923		1.15015	0.000669588	upregulated	1.43753	4.24021e-05	upregulated	1.12013	0.00342505	upregulated	0.967356	0.0101605		2.68974	1.79584e-14	upregulated
ASPWEDRAFT_38634	-2.78355	9.01822e-06	downregulated	0.834998	0.0725128		1.22489	0.00442317	upregulated	1.9952	4.25016e-06	upregulated	1.83359	0.00714366	upregulated	2.01401	0.00171983	upregulated	3.08177	1.0308e-06	upregulated
ASPWEDRAFT_473559	-2.26557	0.040205	downregulated	0.139969	0.865243		1.47139	0.0101308	upregulated	1.41798	0.0238959	upregulated	1.41054	0.24383		3.19177	0.000933625	upregulated	3.00195	0.00372467	upregulated
ASPWEDRAFT_522134	-1.59579	0.0142024	downregulated	0.356777	0.618185		1.76667	0.00212588	upregulated	3.13373	6.2869e-08	upregulated	3.45508	2.70395e-09	upregulated	2.16456	0.000224436	upregulated	5.05569	2.85994e-19	upregulated
ASPWEDRAFT_55318	-5.31925	0.000486241	downregulated	0.96686	0.159833		1.66125	0.00770577	upregulated	1.44412	0.0347492	upregulated	2.72869	0.116833		4.92229	0.000799381	upregulated	0.601508	0.828323
ASPWEDRAFT_102595	-3.57014	0.0478766	downregulated	1.27408	0.217968		2.42962	0.00695418	upregulated	-0.776081	0.606846		2.6682	0.175082		4.73569	0.0024895	upregulated	1.56331	0.531157
ASPWEDRAFT_108281	-2.73993	0.00181294	downregulated	-0.685088	0.282173		1.47604	0.00392367	upregulated	-1.12844	0.103619		0.6778	0.565747		3.59947	7.73604e-06	upregulated	-0.40038	0.817952
ASPWEDRAFT_111674	-2.04754	6.31903e-06	downregulated	0.779908	0.0664413		1.52818	7.51695e-05	upregulated	0.305689	0.541505		1.21722	0.012341	upregulated	2.6734	4.25084e-10	upregulated	0.312311	0.624329
ASPWEDRAFT_120844	-1.54845	0.0287647	downregulated	-0.461604	0.531169		1.29669	0.0363679	upregulated	0.552031	0.458226		0.254998	0.753011		-0.800474	0.273335		0.0672522	0.94546
ASPWEDRAFT_136814	-2.55107	0.000823299	downregulated	-0.102311	0.898234		1.35	0.0232359	upregulated	0.41896	0.577468		2.40337	0.0015392	upregulated	1.73429	0.0243967	upregulated	2.1145	0.00768477	upregulated
ASPWEDRAFT_138156	-1.7633	0.000738091	downregulated	0.955301	0.00625861		1.71154	7.71681e-08	upregulated	-0.868219	0.0611244		2.65382	6.89441e-08	upregulated	4.44853	1.66382e-23	upregulated	0.611293	0.398626
ASPWEDRAFT_148280	-1.02834	0.0468083	downregulated	0.748437	0.0888096		1.03739	0.0113067	upregulated	0.121167	0.834357		1.17616	0.0160683	upregulated	2.0361	3.55628e-06	upregulated	1.75541	0.000191267	upregulated
ASPWEDRAFT_168249	-1.34238	0.0237002	downregulated	-0.236301	0.699936		1.14533	0.0152251	upregulated	-0.0906493	0.898632		-0.860104	0.237661		-0.0582606	0.943306		-0.710243	0.369064
ASPWEDRAFT_170444	-1.58555	0.0152705	downregulated	-0.045414	0.953566		2.5381	4.37405e-06	upregulated	-0.234635	0.76097		1.95047	0.00137759	upregulated	3.40715	1.84759e-09	upregulated	-0.613874	0.420321
ASPWEDRAFT_174264	-1.53805	0.0251492	downregulated	0.498134	0.473171		1.39724	0.0183671	upregulated	1.21778	0.0608532		0.466165	0.536927		1.78824	0.00406607	upregulated	0.651294	0.391444
ASPWEDRAFT_182037	-1.16415	0.00113063	downregulated	0.0986192	0.810087		1.5938	6.01215e-08	upregulated	-0.595094	0.101861		0.606281	0.118475		1.76279	7.11687e-08	upregulated	0.412434	0.338529
ASPWEDRAFT_183160	-1.44342	0.00598564	downregulated	-0.190204	0.754294		1.00603	0.0352031	upregulated	0.252048	0.680473		0.486343	0.398709		0.206836	0.73766		0.339928	0.591965
ASPWEDRAFT_186480	-1.9583	0.000584614	downregulated	0.245649	0.720623		1.55246	0.0037222	upregulated	-0.76261	0.219186		-0.187713	0.783673		0.490451	0.431465		0.324558	0.64437
ASPWEDRAFT_229861	-1.07435	0.0113199	downregulated	0.720209	0.0798868		1.95393	1.08375e-07	upregulated	0.231372	0.637524		1.53065	9.33744e-05	upregulated	2.36832	1.56086e-10	upregulated	0.337915	0.479647
ASPWEDRAFT_30859	-1.42703	0.00143168	downregulated	0.549654	0.128199		1.18733	0.000204962	upregulated	0.226169	0.608259		0.972404	0.0463231		1.7225	4.47563e-05	upregulated	0.809525	0.130754
ASPWEDRAFT_37589	-1.33214	0.00320531	downregulated	0.935396	0.0325398		1.14624	0.00566254	upregulated	0.0253933	0.968832		1.72307	5.26516e-05	upregulated	2.94138	1.84892e-13	upregulated	1.18354	0.00794254	upregulated
ASPWEDRAFT_37820	-1.66581	1.06287e-06	downregulated	0.994337	0.0012323		1.45133	6.77536e-07	upregulated	0.840547	0.0102235		1.90344	2.03841e-08	upregulated	1.7783	7.81855e-08	upregulated	0.330401	0.470136
ASPWEDRAFT_38124	-1.57255	0.00987658	downregulated	-0.413357	0.514723		1.3979	0.00759474	upregulated	0.372144	0.57508		0.602258	0.367836		1.19661	0.0414497	upregulated	0.985149	0.125766
ASPWEDRAFT_38689	-1.7037	0.000320332	downregulated	0.596107	0.171391		1.47711	0.000123364	upregulated	-0.523814	0.282974		0.891111	0.0869524		2.57753	2.95204e-09	upregulated	0.776105	0.162898
ASPWEDRAFT_39758	-2.65849	0.0332794	downregulated	-0.0261107	0.982708		1.6868	0.0499319	upregulated	1.42676	0.134948		3.94276	0.000446113	upregulated	3.52363	0.00143967	upregulated	3.51895	0.00237567	upregulated
ASPWEDRAFT_41357	-2.18478	0.000233436	downregulated	-0.0615898	0.934464		1.52949	0.00572203	upregulated	0.519594	0.440204		-0.639026	0.352791		-0.839491	0.192306		-0.650375	0.363691
ASPWEDRAFT_436547	-4.42008	0.00713032	downregulated	-0.231401	0.838608		1.95068	0.0110716	upregulated	-1.27985	0.289709		2.6935	0.161454		5.62505	0.000148711	upregulated	3.05756	0.112807
ASPWEDRAFT_43974	-1.71994	0.0110156	downregulated	0.126055	0.860746		1.79092	0.000453619	upregulated	0.00243545	0.998191		1.09774	0.124997		1.91568	0.00226264	upregulated	0.783424	0.328231
ASPWEDRAFT_440886	-1.28358	0.0401391	downregulated	0.85691	0.145765		1.95669	0.000217889	upregulated	-0.505848	0.443603		2.38618	1.62796e-05	upregulated	2.75851	2.27075e-07	upregulated	0.147831	0.852655
ASPWEDRAFT_442980	-1.44104	0.000114429	downregulated	0.321427	0.441579		1.00092	0.00502557	upregulated	-0.865726	0.0260034		-0.173436	0.700135		0.888718	0.0165162		-0.510369	0.22276
ASPWEDRAFT_443121	-1.64833	0.0123212	downregulated	0.308067	0.595247		1.31822	0.00390323	upregulated	-0.301032	0.643195		2.44577	5.70363e-05	upregulated	3.52249	2.89842e-10	upregulated	1.48537	0.0321339	upregulated
ASPWEDRAFT_460204	-1.79107	7.52572e-10	downregulated	0.737886	0.00695836		1.72324	5.34744e-12	upregulated	0.48867	0.103306		0.815056	0.0124948		2.57478	1.83159e-20	upregulated	-0.29083	0.495425
ASPWEDRAFT_46244	-2.81705	0.000634278	downregulated	0.2442	0.674992		1.36254	0.00195077	upregulated	0.136412	0.837279		0.669763	0.557034		2.0027	0.0182584	upregulated	1.19725	0.26644
ASPWEDRAFT_47037	-1.25873	0.0385913	downregulated	0.0204556	0.977577		1.73188	0.00069526	upregulated	0.34163	0.605367		0.488789	0.446515		0.637415	0.289053		0.0792435	0.922763
ASPWEDRAFT_50009	-1.63665	0.0264686	downregulated	0.456584	0.507533		1.15505	0.0489117	upregulated	-0.487422	0.513677		1.24948	0.0926114		2.7855	1.3466e-05	upregulated	1.00849	0.210381
ASPWEDRAFT_511279	-1.20258	0.0035504	downregulated	0.250053	0.588284		1.67666	4.31868e-06	upregulated	-0.120042	0.81491		1.74182	6.17027e-06	upregulated	2.50474	7.22522e-12	upregulated	0.885961	0.0335709
ASPWEDRAFT_53282	-1.37515	0.00781224	downregulated	-0.0139192	0.983149		1.10057	0.0211883	upregulated	0.934667	0.0743076		0.766114	0.144263		0.108498	0.860502		0.71247	0.186571
ASPWEDRAFT_53472	-1.09009	0.00130485	downregulated	0.580875	0.0771298		1.44698	8.65634e-07	upregulated	-0.391291	0.285344		-0.574031	0.128184		0.533164	0.126563		-0.481244	0.227458
ASPWEDRAFT_54525	-1.2802	0.00130433	downregulated	0.760234	0.0521677		1.00111	0.00648689	upregulated	-0.789908	0.0536968		0.329419	0.463401		1.43091	0.000125171	upregulated	0.0317362	0.956236
ASPWEDRAFT_617099	-1.18188	0.00632685	downregulated	0.823653	0.0340265		1.27991	0.00039173	upregulated	0.995631	0.0119949		1.42147	0.000581213	upregulated	0.967709	0.0205605		1.37133	0.00118503	upregulated
ASPWEDRAFT_623252	-1.09602	0.000814728	downregulated	0.304283	0.391544		1.01646	0.000816857	upregulated	-0.121912	0.767535		0.300391	0.409755		0.714999	0.0260063		0.583732	0.0902558
ASPWEDRAFT_t161	-4.23017	0.00814829	downregulated	0.739904	0.369309		3.20002	4.17309e-07	upregulated	-1.40475	0.238924		5.13326	0.000621244	upregulated	6.4308	4.20948e-06	upregulated	3.4517	0.0508289
ASPWEDRAFT_101227	-1.13675	0.000611412	downregulated	-0.752218	0.0223615		-0.930926	0.00287695		-1.1207	0.000605134	downregulated	0.216703	0.568592		0.459305	0.178721		0.264914	0.498283
ASPWEDRAFT_110971	-1.73635	0.0374353	downregulated	0.398603	0.662991		-1.1378	0.138305		-1.73388	0.029317	downregulated	0.0582099	0.954611		2.45856	0.000834856	upregulated	-1.17772	0.160157
ASPWEDRAFT_111913	-2.23843	0.00128007	downregulated	0.712604	0.339138		0.816026	0.24478		-2.12865	0.00191144	downregulated	-1.62805	0.0189552	downregulated	2.38056	0.000262325	upregulated	-4.00287	1.0067e-09	downregulated
ASPWEDRAFT_114341	-2.24777	0.00049991	downregulated	-0.976174	0.138406		-0.76039	0.241521		-2.69704	1.82456e-05	downregulated	-0.526345	0.483958		0.593631	0.402246		-0.646227	0.4023
ASPWEDRAFT_115431	-1.29451	0.00341602	downregulated	-0.943421	0.0286363		-0.232808	0.62574		-1.69801	5.35059e-05	downregulated	-1.26916	0.0029642	downregulated	0.766033	0.0772553		-1.48924	0.000460369	downregulated
ASPWEDRAFT_119588	-1.16085	0.0179403	downregulated	-0.361888	0.485435		-0.565911	0.228264		-1.39355	0.00268532	downregulated	-1.73327	0.000190397	downregulated	-0.675673	0.161642		-2.72574	9.4035e-09	downregulated
ASPWEDRAFT_130022	-1.78453	0.000137267	downregulated	-0.78008	0.0904473		-0.924938	0.0350664		-1.42685	0.00212324	downregulated	0.297322	0.608579		0.340084	0.538051		-0.345348	0.591701
ASPWEDRAFT_133709	-2.40623	0.00341576	downregulated	0.503081	0.537049		-0.38574	0.63069		-1.70273	0.0309663	downregulated	0.866958	0.355942		2.95918	9.35352e-05	upregulated	-0.864029	0.46766
ASPWEDRAFT_149113	-1.22822	0.000793017	downregulated	-0.446357	0.246919		0.78375	0.0249806		-4.98508	1.06456e-49	downregulated	0.780557	0.0345684		3.18205	1.47493e-22	upregulated	-2.30143	3.866e-11	downregulated
ASPWEDRAFT_149131	-1.33408	0.00044303	downregulated	-0.127297	0.781964		0.488603	0.193387		-1.96352	8.1124e-08	downregulated	-0.0339441	0.947044		1.38755	0.000116545	upregulated	-0.307469	0.512245
ASPWEDRAFT_151912	-1.45036	0.00150801	downregulated	0.297799	0.567641		-0.186072	0.717314		-1.51105	0.000714522	downregulated	0.136004	0.803546		0.868136	0.0536242		0.338997	0.529303
ASPWEDRAFT_166074	-1.85683	0.0464222	downregulated	-1.1876	0.130169		-0.534353	0.499386		-1.73239	0.0480516	downregulated	2.56528	0.00246909	upregulated	2.12867	0.0115461	upregulated	0.294276	0.83161
ASPWEDRAFT_166230	-3.23511	2.5569e-10	downregulated	-0.373158	0.536982		-0.000801786	0.999254		-1.75603	0.000896208	downregulated	3.6221	9.42721e-13	upregulated	3.24061	8.71551e-11	upregulated	2.01133	0.00018971	upregulated
ASPWEDRAFT_166549	-2.3182	2.7575e-06	downregulated	-0.881437	0.0445258		0.292938	0.519073		-1.74053	0.000203453	downregulated	2.06428	4.93176e-05	upregulated	3.023	9.9799e-11	upregulated	-0.44744	0.584322
ASPWEDRAFT_167003	-2.07549	2.94921e-05	downregulated	-0.49894	0.284543		-0.62326	0.158296		-1.95418	5.9866e-05	downregulated	1.2274	0.0239372	upregulated	1.92016	8.41277e-05	upregulated	0.132869	0.872199
ASPWEDRAFT_174873	-1.40045	0.000737384	downregulated	0.0622245	0.904896		0.162695	0.726297		-1.14444	0.0059021	downregulated	-0.260824	0.592292		0.9695	0.0170326		0.0134207	0.98617
ASPWEDRAFT_182625	-2.35168	0.0263081	downregulated	0.340208	0.729479		1.04933	0.195306		-3.80629	0.00256021	downregulated	2.57297	0.0101809	upregulated	2.16859	0.0290993	upregulated	-0.0924465	0.958812
ASPWEDRAFT_183476	-1.36982	0.0056341	downregulated	-0.00185521	0.998093		-0.632652	0.188524		-1.87494	6.08097e-05	downregulated	-0.44861	0.404453		0.976934	0.039908		-0.417081	0.459181
ASPWEDRAFT_185071	-2.04634	0.0181645	downregulated	-1.56814	0.0579781		-1.37069	0.088417		-3.56698	7.41108e-06	downregulated	-0.908239	0.315472		2.0536	0.00997237	upregulated	-0.596819	0.547127
ASPWEDRAFT_188278	-1.78697	0.000187355	downregulated	0.762393	0.0776027		0.697908	0.0963118		-2.11115	1.0973e-05	downregulated	2.13294	4.84715e-06	upregulated	3.76043	1.40402e-18	upregulated	0.674703	0.245056
ASPWEDRAFT_206079	-2.43075	1.23022e-09	downregulated	-0.61651	0.155992		-0.130689	0.788129		-1.52533	0.00021891	downregulated	1.9021	3.2229e-06	upregulated	2.16392	3.81558e-08	upregulated	1.26585	0.00312965	upregulated
ASPWEDRAFT_27118	-1.15415	0.0027174	downregulated	-0.505192	0.195196		-0.243258	0.546017		-2.62979	6.68998e-13	downregulated	0.262736	0.550553		0.839793	0.0245445		-1.13581	0.00529192	downregulated
ASPWEDRAFT_28594	-2.32139	0.00834886	downregulated	-0.141092	0.892561		-1.08172	0.194703		-3.58828	2.93612e-05	downregulated	0.0827858	0.942409		0.773049	0.408368		-1.68284	0.102455
ASPWEDRAFT_28891	-1.43616	0.00395024	downregulated	-0.584481	0.232766		-0.995352	0.0284224		-1.13248	0.0211224	downregulated	-0.860664	0.135306		0.618655	0.236862		-0.332977	0.614055
ASPWEDRAFT_31174	-4.45991	0.0138888	downregulated	-1.14763	0.344985		-1.27629	0.274741		-3.04995	0.0404016	downregulated	3.4355	0.0607118		3.92401	0.0227079	upregulated	0.601523	0.839946
ASPWEDRAFT_32232	-1.66085	0.00106665	downregulated	-0.609162	0.209251		0.749714	0.0888466		-1.39064	0.00507089	downregulated	-0.679088	0.29949		0.875207	0.0987136		-1.01216	0.151193
ASPWEDRAFT_33295	-2.22999	2.64061e-06	downregulated	-0.90024	0.0634424		-0.67226	0.159969		-1.12322	0.0232556	downregulated	-0.860031	0.121978		-0.551658	0.317151		-0.217972	0.747312
ASPWEDRAFT_37421	-2.67382	2.42588e-07	downregulated	-0.766082	0.101856		0.757812	0.081679		-1.1764	0.0152989	downregulated	1.20246	0.0424266	upregulated	2.63618	2.04232e-07	upregulated	1.40725	0.0184263	upregulated
ASPWEDRAFT_37953	-2.38893	0.0024801	downregulated	-1.06291	0.180797		-1.44231	0.0519922		-3.03343	7.36834e-05	downregulated	-1.09373	0.213364		1.21758	0.1263		-1.92407	0.0334847	downregulated
ASPWEDRAFT_38679	-1.63324	2.11976e-21	downregulated	-0.345251	0.0704236		-0.168119	0.393119		-1.22837	2.50652e-12	downregulated	0.385209	0.0492072		1.48554	3.80823e-18	upregulated	-0.190459	0.391576
ASPWEDRAFT_40283	-1.60894	0.000470909	downregulated	0.330214	0.521002		-0.591407	0.197105		-1.05606	0.024753	downregulated	0.334401	0.530384		1.0901	0.0159899	upregulated	0.809618	0.100818
ASPWEDRAFT_41344	-1.08142	0.000736476	downregulated	-0.549478	0.072786		-0.778928	0.00748169		-1.48166	2.85607e-06	downregulated	-0.782272	0.0404021		-0.0463048	0.916416		-0.848968	0.0369847
ASPWEDRAFT_41408	-2.33189	7.60681e-08	downregulated	-0.372847	0.461797		0.489316	0.296738		-1.99432	5.43155e-06	downregulated	-0.489705	0.329934		1.92649	6.07225e-06	upregulated	-0.492739	0.340887
ASPWEDRAFT_42592	-3.37352	2.38178e-15	downregulated	-0.554916	0.230387		0.708118	0.100783		-3.61491	5.5466e-17	downregulated	1.42779	0.00219894	upregulated	3.74866	2.36842e-19	upregulated	-2.75679	3.58719e-05	downregulated
ASPWEDRAFT_42934	-1.29318	0.011743	downregulated	-0.795328	0.114114		-0.580688	0.244728		-1.34949	0.0064414	downregulated	-1.03791	0.0388418	downregulated	0.486248	0.356634		-0.0436396	0.950709
ASPWEDRAFT_431950	-1.3696	4.37858e-05	downregulated	-0.543401	0.118626		0.2161	0.556175		-1.0742	0.00152564	downregulated	0.0367772	0.935404		1.04388	0.00146993	upregulated	0.196704	0.646688
ASPWEDRAFT_438160	-1.57775	0.00212297	downregulated	-0.0138385	0.982254		0.358965	0.474097		-1.16215	0.021824	downregulated	0.179994	0.781154		1.98404	3.01249e-05	upregulated	0.227961	0.749111
ASPWEDRAFT_44534	-2.12247	0.028906	downregulated	-1.27405	0.144591		-1.43015	0.0890295		-2.38112	0.0113627	downregulated	-0.432136	0.72704		1.55613	0.0961486		-1.40871	0.308212
ASPWEDRAFT_445369	-1.0236	6.5026e-05	downregulated	-0.0818922	0.797396		-0.858251	0.000396469		-1.11704	8.93827e-06	downregulated	0.297524	0.299754		0.335593	0.219572		0.0558601	0.877591
ASPWEDRAFT_448938	-1.33895	0.0151496	downregulated	-0.162979	0.788445		-0.42447	0.418275		-1.23838	0.0202705	downregulated	1.42213	0.00720661	upregulated	1.6168	0.00133841	upregulated	-1.8069	0.0132246	downregulated
ASPWEDRAFT_44926	-1.34488	0.000504871	downregulated	0.210928	0.642759		0.736363	0.0494959		-1.27661	0.000850779	downregulated	0.384881	0.3696		1.46613	5.63773e-05	upregulated	0.245471	0.603805
ASPWEDRAFT_45220	-2.50219	8.25146e-09	downregulated	0.484349	0.312742		0.0377137	0.945395		-2.22457	3.37661e-07	downregulated	0.772572	0.11561		1.93692	7.19192e-06	upregulated	-1.54841	0.00299029	downregulated
ASPWEDRAFT_46503	-1.39893	0.00142553	downregulated	-0.863859	0.04798		-0.617802	0.153852		-2.02968	1.01559e-06	downregulated	0.860669	0.0522576		0.936846	0.0285543		-0.81185	0.0758777
ASPWEDRAFT_46975	-2.17708	0.0188054	downregulated	1.52617	0.0783458		-0.461503	0.626062		-2.05435	0.0219301	downregulated	-0.787592	0.446379		1.74697	0.0452085	upregulated	-0.816154	0.453925
ASPWEDRAFT_471924	-1.85974	0.0335751	downregulated	0.217852	0.829833		0.403511	0.653082		-2.45752	0.00261239	downregulated	-0.577196	0.541281		2.16125	0.00604078	upregulated	-0.999139	0.282496
ASPWEDRAFT_54594	-1.92413	5.74563e-09	downregulated	-0.628081	0.0779765		0.465793	0.185561		-2.0069	1.09074e-09	downregulated	0.139185	0.73937		1.7173	1.1279e-07	upregulated	-0.851643	0.0175112
ASPWEDRAFT_552642	-5.19299	9.65311e-13	downregulated	0.41689	0.647404		0.154876	0.867436		-1.82544	0.0213709	downregulated	0.00774028	0.994075		2.54524	0.000707862	upregulated	-1.55577	0.0815923
ASPWEDRAFT_617712	-1.11131	0.00111542	downregulated	-0.901112	0.00630907		-0.280286	0.433827		-1.92878	1.23897e-09	downregulated	-0.672647	0.0513897		0.882372	0.00706028		-0.803064	0.0195632
ASPWEDRAFT_643479	-2.63525	0.0260425	downregulated	0.147198	0.880907		-0.201005	0.82976		-3.10916	0.0123398	downregulated	-1.64217	0.399398		1.30181	0.307151		0.887929	0.57811
ASPWEDRAFT_68122	-4.28314	0.00039654	downregulated	0.0701833	0.957931		-0.671736	0.554201		-2.29212	0.0407116	downregulated	1.1221	0.438265		3.90699	0.000754458	upregulated	0.405093	0.829099
ASPWEDRAFT_691335	-1.17789	0.00109411	downregulated	-0.198277	0.615881		0.493122	0.138498		-1.9231	7.89509e-08	downregulated	0.132329	0.771251		1.52758	5.21474e-06	upregulated	-1.44591	0.00147408	downregulated
ASPWEDRAFT_725897	-2.07453	1.68071e-08	downregulated	0.669228	0.0868548		0.95223	0.00892098		-1.33548	0.000439658	downregulated	1.6451	1.07413e-05	upregulated	3.25562	8.83477e-21	upregulated	0.208269	0.673758
ASPWEDRAFT_734149	-2.12667	1.556e-05	downregulated	-0.230822	0.693449		-0.16314	0.771752		-1.19095	0.0186253	downregulated	0.797779	0.144388		1.29451	0.00930064	upregulated	0.441263	0.476083
ASPWEDRAFT_96405	-2.51555	0.0136509	downregulated	-0.46772	0.685477		-0.696978	0.502626		-2.0097	0.0462479	downregulated	-0.249621	0.835813		2.81635	0.00252547	upregulated	0.0822299	0.953818
ASPWEDRAFT_97292	-1.45248	0.0108399	downregulated	0.664268	0.250253		0.170744	0.787558		-1.24437	0.0267077	downregulated	-0.465208	0.447795		1.11433	0.0392533	upregulated	-0.690641	0.251951
ASPWEDRAFT_102062	-6.58034	2.71538e-06	downregulated	-0.871638	0.514808		0.0347193	0.982687		2.64837	0.0288992	upregulated	6.005	1.7709e-05	upregulated	0.95339	0.595029		5.26292	0.000227625	upregulated
ASPWEDRAFT_115425	-1.30908	0.00319131	downregulated	0.830172	0.0504482		0.490285	0.255233		1.11945	0.0086855	upregulated	1.29585	0.00261921	upregulated	1.27256	0.00237049	upregulated	1.17401	0.00793529	upregulated
ASPWEDRAFT_116336	-1.12116	0.000263322	downregulated	0.528222	0.0811153		-0.531726	0.0721921		1.09639	0.000158077	upregulated	1.54181	1.60698e-07	upregulated	0.519917	0.103576		1.5125	3.68646e-07	upregulated
ASPWEDRAFT_118499	-1.13868	0.000293436	downregulated	0.292389	0.379406		-0.101863	0.774375		1.05911	0.00040235	upregulated	1.01335	0.00124197	upregulated	-0.328653	0.35341		1.03229	0.00118095	upregulated
ASPWEDRAFT_120138	-3.60749	1.59433e-17	downregulated	0.506627	0.284422		-0.716213	0.10265		1.25712	0.00477457	upregulated	3.20624	9.03837e-14	upregulated	2.51682	3.86678e-09	upregulated	4.18216	2.9603e-23	upregulated
ASPWEDRAFT_133077	-1.65639	1.62295e-07	downregulated	0.616902	0.045132		0.0776356	0.831361		1.40859	1.36617e-06	upregulated	2.68953	7.3894e-19	upregulated	2.03176	2.08026e-11	upregulated	3.13434	1.19856e-25	upregulated
ASPWEDRAFT_138454	-3.3515	2.25074e-07	downregulated	0.340399	0.567914		0.468816	0.386911		1.30479	0.0125404	upregulated	2.70693	5.53157e-05	upregulated	1.8828	0.00610236	upregulated	1.48135	0.0567335
ASPWEDRAFT_161533	-1.75715	0.00488354	downregulated	0.474004	0.484166		1.0753	0.0682618		1.95454	0.00107478	upregulated	1.46517	0.0161212	upregulated	0.8211	0.191428		2.44305	3.04979e-05	upregulated
ASPWEDRAFT_169725	-1.07006	0.0205117	downregulated	0.789725	0.0700838		-0.421605	0.348019		1.49184	0.000400393	upregulated	0.707025	0.124138		0.27402	0.581335		1.19977	0.00626065	upregulated
ASPWEDRAFT_173328	-2.23376	1.18013e-07	downregulated	0.9688	0.00787442		-0.0658976	0.885217		1.23653	0.000821502	upregulated	-0.115823	0.857959		0.736189	0.128091		0.681459	0.207509
ASPWEDRAFT_175072	-2.75433	1.63681e-13	downregulated	0.309305	0.411533		-0.993267	0.00287547		1.0917	0.00126563	upregulated	2.03632	2.63028e-07	upregulated	1.81344	2.92487e-06	upregulated	2.805	2.14146e-13	upregulated
ASPWEDRAFT_175284	-2.5538	1.87367e-07	downregulated	-0.0493751	0.927767		0.842838	0.0392141		1.29384	0.00205864	upregulated	1.87455	0.000294754	upregulated	1.64076	0.00127889	upregulated	2.10347	5.02382e-05	upregulated
ASPWEDRAFT_176503	-2.35977	0.00064558	downregulated	1.01497	0.0678323		0.280154	0.651911		1.91223	0.000344244	upregulated	1.25525	0.103056		1.97068	0.0038514	upregulated	2.12305	0.00302656	upregulated
ASPWEDRAFT_177466	-2.14345	0.000105579	downregulated	0.611629	0.204913		0.236725	0.64777		1.20522	0.00940198	upregulated	1.79679	0.00159111	upregulated	1.79858	0.00104901	upregulated	2.28103	4.45714e-05	upregulated
ASPWEDRAFT_178936	-1.46899	0.0165622	downregulated	0.590414	0.334749		0.990788	0.0733269		2.95695	2.91298e-08	upregulated	1.21341	0.0418808	upregulated	0.469854	0.470855		1.63226	0.00534974	upregulated
ASPWEDRAFT_188293	-1.65021	0.017737	downregulated	0.781892	0.133769		0.22247	0.707688		1.11152	0.0340971	upregulated	1.14634	0.122718		0.961523	0.186395		1.18305	0.127094
ASPWEDRAFT_233835	-4.75023	6.00249e-08	downregulated	-0.689351	0.394228		-0.135354	0.877737		2.12191	0.00382074	upregulated	3.29683	0.000302117	upregulated	1.14848	0.272574		2.59263	0.00719275	upregulated
ASPWEDRAFT_235042	-2.24197	8.01091e-05	downregulated	0.64139	0.256808		-0.637093	0.248144		1.42691	0.00797924	upregulated	-0.570029	0.43289		-0.585941	0.397491		0.884694	0.178525
ASPWEDRAFT_26579	-1.63513	3.51458e-05	downregulated	0.741895	0.0673379		-0.428856	0.29867		1.00089	0.0139899	upregulated	1.508	0.000117787	upregulated	0.395254	0.366909		1.69673	1.39786e-05	upregulated
ASPWEDRAFT_27790	-1.19638	0.0164062	downregulated	0.919726	0.0410958		0.990237	0.0213364		1.03648	0.0248184	upregulated	0.982655	0.045379		0.922593	0.0533033		0.714108	0.177839
ASPWEDRAFT_34272	-4.07346	5.36588e-05	downregulated	-0.260393	0.83564		0.0692847	0.954702		2.91341	0.00332667	upregulated	3.69228	0.000213469	upregulated	-0.214525	0.872294		3.21025	0.00164731	upregulated
ASPWEDRAFT_34283	-1.76063	0.00151481	downregulated	0.736798	0.192154		0.816212	0.127583		1.31643	0.0169008	upregulated	0.144026	0.833445		-0.108325	0.876279		0.542232	0.39626
ASPWEDRAFT_34408	-1.7123	0.00653234	downregulated	0.704563	0.140598		-0.248482	0.649969		1.31182	0.00458951	upregulated	0.437567	0.587737		0.952015	0.155862		1.5641	0.0185833	upregulated
ASPWEDRAFT_36385	-2.68304	3.51674e-10	downregulated	0.685254	0.094637		-0.643047	0.112121		1.24487	0.00180146	upregulated	1.11651	0.0212944	upregulated	0.845691	0.0806411		2.08505	3.9248e-06	upregulated
ASPWEDRAFT_39558	-3.0016	0.010833	downregulated	0.990443	0.411533		1.54913	0.157565		2.38468	0.0351487	upregulated	1.22956	0.32584		1.11415	0.363726		2.05302	0.0857291
ASPWEDRAFT_39755	-1.69902	0.0353103	downregulated	1.17351	0.0945096		1.10651	0.103336		2.62785	7.76921e-05	upregulated	3.98167	1.09373e-08	upregulated	1.96761	0.00696013	upregulated	3.46207	1.13239e-06	upregulated
ASPWEDRAFT_40764	-2.25787	0.0010008	downregulated	-1.16551	0.0901179		-0.00367059	0.996557		1.48948	0.0309797	upregulated	1.05884	0.143283		-0.282812	0.732334		0.929657	0.216783
ASPWEDRAFT_41105	-3.38756	0.00385865	downregulated	-0.82065	0.256509		-1.3519	0.0576405		1.48326	0.0187322	upregulated	2.75712	0.0213749	upregulated	0.955985	0.514627		4.37923	8.53101e-05	upregulated
ASPWEDRAFT_41937	-1.6766	0.000322592	downregulated	0.645369	0.15358		0.324872	0.490342		1.735	3.8559e-05	upregulated	0.278247	0.630725		0.951408	0.0455241		0.87606	0.0897891
ASPWEDRAFT_42707	-2.04298	2.8675e-05	downregulated	0.647566	0.0944474		0.268687	0.520221		1.2594	0.000718945	upregulated	1.63762	0.00150024	upregulated	1.1887	0.0229396	upregulated	2.34371	2.11484e-06	upregulated
ASPWEDRAFT_44876	-4.04589	1.44428e-05	downregulated	0.651257	0.37357		0.444344	0.543989		2.7752	1.58847e-05	upregulated	2.91648	0.00274458	upregulated	1.39197	0.196806		2.91761	0.00333739	upregulated
ASPWEDRAFT_45357	-1.72725	0.00554039	downregulated	-0.0515439	0.946629		0.42914	0.507772		1.76658	0.00332184	upregulated	0.82643	0.20027		-0.176145	0.811218		1.49025	0.014984	upregulated
ASPWEDRAFT_45682	-1.34305	0.0228657	downregulated	0.56472	0.262206		0.690068	0.144676		1.99865	7.5845e-06	upregulated	1.81237	0.00098846	upregulated	0.46755	0.478139		1.77082	0.00175491	upregulated
ASPWEDRAFT_47055	-1.74943	0.00748925	downregulated	0.429843	0.37357		0.422331	0.368331		1.69683	3.92938e-05	upregulated	0.673662	0.406072		0.201783	0.82444		1.46778	0.0404165	upregulated
ASPWEDRAFT_47580	-1.32881	0.000356558	downregulated	0.458198	0.185522		-0.617216	0.0686378		1.337	2.55698e-05	upregulated	1.80971	4.50614e-07	upregulated	0.541306	0.183822		2.60447	4.10204e-14	upregulated
ASPWEDRAFT_501856	-2.00878	1.25446e-07	downregulated	0.686583	0.0776027		0.52033	0.175461		1.20695	0.00147295	upregulated	3.26385	3.54543e-19	upregulated	2.24067	9.36777e-10	upregulated	3.03295	1.29494e-16	upregulated
ASPWEDRAFT_51819	-1.06601	0.0337977	downregulated	0.154824	0.783699		-0.291609	0.560371		1.27332	0.00561461	upregulated	2.40563	4.3861e-08	upregulated	1.96199	6.35211e-06	upregulated	2.46056	2.23896e-08	upregulated
ASPWEDRAFT_52237	-2.29366	0.00897161	downregulated	0.784576	0.379246		0.410537	0.653082		1.82632	0.0302164	upregulated	2.20406	0.00895634	upregulated	1.96386	0.0177199	upregulated	2.13127	0.013053	upregulated
ASPWEDRAFT_562645	-1.28388	0.00398225	downregulated	0.202852	0.660448		-0.340281	0.419651		1.60673	1.2382e-05	upregulated	2.02908	9.98745e-07	upregulated	0.766673	0.0934379		3.10893	3.83073e-15	upregulated
ASPWEDRAFT_643910	-1.3756	7.08694e-05	downregulated	-0.0277166	0.947779		-0.115044	0.762606		1.09679	0.000634405	upregulated	1.6575	9.8798e-07	upregulated	0.945324	0.00676485		1.12559	0.00186436	upregulated
ASPWEDRAFT_67954	-2.52711	1.58353e-08	downregulated	0.204114	0.679435		-0.0622778	0.901343		1.14765	0.00561509	upregulated	-1.05995	0.0899841		-1.55305	0.0103267	downregulated	-0.917837	0.170894
ASPWEDRAFT_100095	-2.06993	0.000276224	downregulated	-0.244201	0.725109		-0.828917	0.146804		-0.902801	0.141644		-0.541379	0.395441		1.13693	0.0453738	upregulated	-0.539021	0.41322
ASPWEDRAFT_100938	-1.38887	9.16013e-06	downregulated	-0.684346	0.0259398		-0.995913	0.000662906		-0.118157	0.761717		-0.330705	0.399363		-0.885429	0.011546		0.391944	0.309333
ASPWEDRAFT_101375	-1.00453	0.000984273	downregulated	-0.412877	0.193124		-0.320286	0.305163		-0.190618	0.599842		0.659283	0.0313221		0.248401	0.456567		0.511169	0.111631
ASPWEDRAFT_105059	-3.19041	9.31494e-10	downregulated	0.737332	0.106799		0.605708	0.177139		0.315077	0.555043		0.774097	0.24383		2.32609	1.21696e-05	upregulated	1.17035	0.0684977
ASPWEDRAFT_105068	-2.94871	6.9508e-18	downregulated	0.125663	0.76805		-0.591738	0.0858684		0.298336	0.459712		0.327266	0.465636		1.33225	0.000246127	upregulated	0.523949	0.233545
ASPWEDRAFT_105181	-4.43308	2.35721e-07	downregulated	-0.0209038	0.985231		1.23072	0.142379		0.258389	0.810551		0.771681	0.463733		3.66412	1.41066e-05	upregulated	0.375136	0.766136
ASPWEDRAFT_105483	-1.31928	0.000107479	downregulated	-0.202201	0.613975		0.222681	0.549896		-0.809573	0.021946		-0.024773	0.957135		0.468002	0.192422		-0.247352	0.55747
ASPWEDRAFT_105628	-2.80368	2.50643e-05	downregulated	-0.111983	0.896918		-0.887671	0.195181		-0.896774	0.229278		-0.292525	0.71911		1.47885	0.0278071	upregulated	0.148727	0.873139
ASPWEDRAFT_105673	-3.02173	2.46727e-10	downregulated	0.803285	0.0578198		0.991594	0.0130693		0.996568	0.0205626		0.873547	0.136927		1.42051	0.00611284	upregulated	-0.316787	0.700307
ASPWEDRAFT_105958	-1.43785	0.00144059	downregulated	0.717532	0.109945		0.391023	0.394451		0.68857	0.142805		0.899531	0.0506271		1.19041	0.00609319	upregulated	0.855155	0.0707622
ASPWEDRAFT_106302	-3.22535	1.77927e-05	downregulated	-0.28995	0.75856		-1.24946	0.100409		-1.07548	0.200567		-0.266051	0.7739		1.63111	0.0324872	upregulated	-0.346133	0.727134
ASPWEDRAFT_106866	-4.28405	0.0303333	downregulated	-0.867262	0.558726		-1.11061	0.423471		-2.82262	0.0875017		-0.701824	0.799158		1.77586	0.420181		0.601531	0.845392
ASPWEDRAFT_108291	-1.17956	0.00133061	downregulated	0.079458	0.864361		0.312012	0.414802		-0.356526	0.388402		1.69199	1.02205e-06	upregulated	1.46546	1.7009e-05	upregulated	0.548669	0.162195
ASPWEDRAFT_109455	-1.18422	6.28784e-07	downregulated	0.429038	0.0571227		0.745795	0.000318401		0.901536	3.01253e-05		1.07767	1.1693e-05	upregulated	0.491699	0.0588765		1.22568	7.15162e-07	upregulated
ASPWEDRAFT_109862	-1.14049	0.0496235	downregulated	0.387122	0.514145		-0.790315	0.132734		0.0130538	0.988166		0.412779	0.500599		0.96619	0.0719074		0.737632	0.211173
ASPWEDRAFT_109917	-4.33121	0.0113638	downregulated	0.233412	0.847798		-0.0682565	0.955384		-1.1625	0.375308		3.93955	0.021954	upregulated	3.46318	0.042983	upregulated	1.56331	0.533328
ASPWEDRAFT_109955	-1.08342	0.0140217	downregulated	0.7203	0.0811449		-0.71197	0.0789255		0.518226	0.249486		0.00602332	0.992088		0.641673	0.141017		0.481736	0.322274
ASPWEDRAFT_110313	-1.08895	7.95086e-05	downregulated	0.28746	0.330441		-0.00579358	0.986784		0.382825	0.200306		0.414957	0.170978		0.116707	0.731681		1.09396	7.22916e-05	upregulated
ASPWEDRAFT_110782	-6.0436	0.000124593	downregulated	1.48407	0.068454		-0.315753	0.736876		1.03894	0.242868		2.4869	0.18292		5.09244	0.000926896	upregulated	2.80184	0.136085
ASPWEDRAFT_110954	-1.72169	0.0189691	downregulated	-0.523146	0.415067		-0.072344	0.917502		-0.244739	0.742322		0.540792	0.54378		0.808931	0.306995		0.116836	0.922164
ASPWEDRAFT_111296	-1.36872	8.288e-05	downregulated	0.530835	0.141719		-0.0106913	0.982057		0.120272	0.786121		1.44278	2.20069e-05	upregulated	1.97192	1.0671e-09	upregulated	0.426174	0.282651
ASPWEDRAFT_111955	-1.24043	0.00028092	downregulated	-0.188341	0.628795		0.138897	0.712589		-0.245506	0.533667		-0.2018	0.632091		1.10333	0.000845852	upregulated	0.106729	0.827787
ASPWEDRAFT_111958	-1.28234	0.00459351	downregulated	0.607595	0.0958773		0.738233	0.0321923		0.697045	0.0678713		1.54894	0.000439328	upregulated	1.43268	0.000821888	upregulated	1.55562	0.000604045	upregulated
ASPWEDRAFT_112273	-2.52188	8.99466e-17	downregulated	-0.255297	0.362288		-0.570824	0.0242181		-0.10043	0.761717		-0.201121	0.681635		-0.301179	0.506734		0.103369	0.855492
ASPWEDRAFT_112486	-1.03741	0.00335202	downregulated	0.820565	0.0147908		-0.631924	0.0589463		0.357378	0.355481		1.51965	4.27692e-06	upregulated	1.62584	3.67873e-07	upregulated	1.02085	0.00317211	upregulated
ASPWEDRAFT_112587	-1.17976	3.05443e-08	downregulated	0.711991	0.000832726		0.445471	0.0386107		0.937978	1.24859e-05		0.441994	0.0566769		-0.0718839	0.793923		0.300758	0.227256
ASPWEDRAFT_113017	-1.43693	0.00689817	downregulated	-0.435529	0.395327		0.661866	0.144197		-0.534867	0.320572		-1.40388	0.0440204	downregulated	-0.298211	0.654947		-1.93233	0.0188031	downregulated
ASPWEDRAFT_113704	-2.96594	0.0015481	downregulated	1.65352	0.0648339		1.13227	0.204649		-1.2649	0.194692		0.767071	0.47538		4.80584	1.52675e-08	upregulated	-0.947978	0.431358
ASPWEDRAFT_113973	-1.50538	0.000199619	downregulated	0.30442	0.488455		0.622762	0.106296		-0.241455	0.612216		0.811307	0.0580425		1.43942	0.000219429	upregulated	1.33399	0.00115962	upregulated
ASPWEDRAFT_114055	-1.93925	0.000116604	downregulated	0.46991	0.396137		0.0529035	0.931726		-0.0260459	0.972149		1.34779	0.00816084	upregulated	1.87599	9.8498e-05	upregulated	0.93209	0.0841471
ASPWEDRAFT_114109	-4.35094	0.0108275	downregulated	-0.993758	0.391308		-1.5514	0.184367		-0.502739	0.701033		3.1407	0.0906554		4.61818	0.00362085	upregulated	4.45867	0.00883569	upregulated
ASPWEDRAFT_114702	-2.60379	4.39897e-05	downregulated	-0.556203	0.288464		-0.756835	0.128264		-0.910976	0.0974349		1.73382	0.0122026	upregulated	1.05687	0.146523		1.23158	0.115138
ASPWEDRAFT_114785	-1.00772	0.0173448	downregulated	-0.204487	0.659426		-0.443367	0.270661		-0.250548	0.596		0.392768	0.390337		0.327963	0.467859		1.32194	0.000935709	upregulated
ASPWEDRAFT_114858	-1.10765	0.000243503	downregulated	0.352065	0.274244		0.69032	0.0167571		-0.10243	0.789091		0.866807	0.00404723		0.909794	0.00181664		0.601671	0.0590235
ASPWEDRAFT_115117	-1.72155	3.79029e-06	downregulated	0.732981	0.0555084		-0.750332	0.0420775		0.331816	0.44882		1.40607	0.000180928	upregulated	1.64107	5.33022e-06	upregulated	1.79692	1.22105e-06	upregulated
ASPWEDRAFT_115453	-2.43908	0.00181294	downregulated	-0.255743	0.709925		0.537468	0.35092		-0.308212	0.669767		0.0950745	0.939349		0.850665	0.354264		0.900544	0.383101
ASPWEDRAFT_116251	-1.34874	0.0015481	downregulated	-0.689734	0.110657		-0.0377108	0.941563		-0.980307	0.0234038		-1.81096	7.16873e-06	downregulated	-0.00536113	0.994164		-1.58519	0.00011194	downregulated
ASPWEDRAFT_116254	-2.82604	1.34393e-10	downregulated	0.590503	0.229712		-0.546261	0.251124		0.474014	0.370309		1.48309	0.00135566	upregulated	2.14906	9.12688e-07	upregulated	1.47416	0.00164077	upregulated
ASPWEDRAFT_116696	-1.40023	0.000495133	downregulated	-0.338713	0.441177		-0.051597	0.915062		-0.144471	0.773976		-0.136017	0.781888		0.0435737	0.935703		-0.0119767	0.987972
ASPWEDRAFT_117096	-1.233	0.0013383	downregulated	0.453281	0.234631		0.379189	0.311455		-0.528173	0.190767		0.745795	0.062735		1.85122	1.39662e-07	upregulated	-0.550161	0.237418
ASPWEDRAFT_119143	-2.96207	1.23218e-05	downregulated	0.922931	0.204506		-0.407416	0.591415		0.396422	0.637114		1.37813	0.053945		2.13303	0.00139944	upregulated	0.560753	0.499017
ASPWEDRAFT_119346	-5.45739	1.42355e-10	downregulated	0.157577	0.882982		-0.937069	0.277326		0.690917	0.479115		3.29877	0.000208789	upregulated	3.91386	4.34524e-06	upregulated	2.13597	0.025085	upregulated
ASPWEDRAFT_119347	-5.47022	2.09835e-06	downregulated	1.27032	0.308674		-1.21864	0.309664		1.40818	0.273238		3.82848	0.00110145	upregulated	4.50567	6.45256e-05	upregulated	2.78177	0.0236337	upregulated
ASPWEDRAFT_119576	-3.32759	0.0320759	downregulated	1.13537	0.190503		1.17094	0.158723		1.50908	0.0848316		1.82051	0.288424		2.19526	0.159675		-1.24004	0.607253
ASPWEDRAFT_119585	-1.57685	0.027373	downregulated	1.0837	0.100094		-0.575092	0.4009		-0.26978	0.742507		0.949874	0.188641		1.43158	0.0308938	upregulated	0.634615	0.424326
ASPWEDRAFT_120806	-1.68935	0.014046	downregulated	-0.657917	0.279892		0.440173	0.447533		-0.508062	0.449305		-0.944852	0.324177		-0.145104	0.877397		0.137901	0.899877
ASPWEDRAFT_120837	-2.15134	0.0136706	downregulated	1.15563	0.0824989		-0.903867	0.206854		-0.638916	0.433578		-0.119092	0.928365		1.09074	0.23879		1.17183	0.244514
ASPWEDRAFT_120996	-2.13626	0.000721934	downregulated	0.655344	0.334942		-0.823167	0.1937		0.136216	0.87307		0.699792	0.310142		1.4909	0.0154077	upregulated	0.871473	0.204208
ASPWEDRAFT_121427	-3.03092	0.0117392	downregulated	1.93491	0.0988106		-0.775659	0.531887		-0.270996	0.859263		0.812734	0.536874		3.51258	0.00139383	upregulated	0.806225	0.56136
ASPWEDRAFT_121967	-5.87272	4.44807e-10	downregulated	0.393638	0.745681		-1.83372	0.0586465		0.187198	0.89045		2.46108	0.0147506	upregulated	3.72866	8.35619e-05	upregulated	2.19796	0.0339443	upregulated
ASPWEDRAFT_122228	-1.1474	0.00477577	downregulated	-0.201107	0.659897		-0.462851	0.240296		-0.342969	0.442575		0.195146	0.683568		0.742655	0.0630372		0.492466	0.274507
ASPWEDRAFT_122309	-2.08405	0.0258239	downregulated	0.00610143	0.995413		0.981735	0.179456		0.458063	0.60758		0.537658	0.635183		0.43368	0.699914		0.146593	0.920325
ASPWEDRAFT_122609	-1.96791	0.0130061	downregulated	-0.26647	0.72179		0.134312	0.853943		-0.865351	0.235099		-0.499936	0.659439		1.20718	0.138812		-0.372632	0.779163
ASPWEDRAFT_123520	-1.09855	0.0353489	downregulated	0.741265	0.137866		-0.0564348	0.92446		0.653755	0.216281		0.0741475	0.905241		1.00688	0.0355145	upregulated	0.591195	0.27061
ASPWEDRAFT_125855	-2.26211	0.000298606	downregulated	0.319705	0.638822		-0.814695	0.167683		-0.395987	0.571897		1.12508	0.0957095		1.18827	0.0654137		1.15639	0.0956206
ASPWEDRAFT_134859	-1.59656	2.04583e-12	downregulated	-0.290663	0.260701		0.161448	0.54008		-0.818497	0.000683121		0.00187444	0.995415		0.72324	0.00220527		-0.270085	0.338259
ASPWEDRAFT_135265	-1.65865	0.000314584	downregulated	-0.354534	0.489824		-0.678062	0.13649		-0.488242	0.344777		0.883226	0.065001		1.24486	0.0055931	upregulated	0.482349	0.366743
ASPWEDRAFT_138055	-1.04695	7.80206e-07	downregulated	0.220519	0.349225		0.370547	0.0826448		0.947692	5.53815e-06		1.31129	2.46817e-10	upregulated	1.42753	1.17548e-12	upregulated	1.79892	5.6297e-19	upregulated
ASPWEDRAFT_138555	-1.48663	0.00270707	downregulated	0.46987	0.356591		0.350691	0.487127		0.84385	0.0893275		0.0585888	0.929484		0.253778	0.659738		1.12613	0.0260123	upregulated
ASPWEDRAFT_141060	-1.36614	8.59303e-11	downregulated	0.442639	0.0492387		0.0666206	0.799173		-0.851021	0.000103394		1.24574	4.68133e-09	upregulated	1.5797	9.84098e-15	upregulated	0.369345	0.129307
ASPWEDRAFT_141622	-3.82994	4.78715e-11	downregulated	-0.051897	0.942677		-0.102599	0.879659		-0.993704	0.101283		3.03845	3.8298e-07	upregulated	4.22078	8.88114e-14	upregulated	0.757561	0.315035
ASPWEDRAFT_147133	-1.82136	0.00130506	downregulated	0.943486	0.100263		0.152724	0.817152		0.440074	0.501162		0.855831	0.147849		1.47514	0.00666304	upregulated	1.00245	0.0898363
ASPWEDRAFT_149185	-1.71955	0.0187	downregulated	0.487485	0.457198		-0.574625	0.373125		-0.108948	0.89712		-0.967949	0.324793		0.545269	0.509627		0.0873437	0.940207
ASPWEDRAFT_151666	-2.20034	0.0495014	downregulated	0.197368	0.845654		-0.138876	0.886826		-1.67812	0.0962375		-1.32123	0.447364		0.297181	0.834978		-0.410972	0.828069
ASPWEDRAFT_154177	-1.56873	0.00156127	downregulated	-0.550302	0.290016		0.451425	0.373667		-0.30867	0.596712		-1.3431	0.00801121	downregulated	-0.166318	0.78087		-0.397666	0.502568
ASPWEDRAFT_157635	-1.24163	0.0114968	downregulated	0.0551523	0.919938		0.355695	0.436034		0.457218	0.350109		1.04644	0.0330838	upregulated	0.805413	0.100633		-0.0564951	0.940519
ASPWEDRAFT_160033	-4.10163	0.000189793	downregulated	1.03546	0.261488		0.0704938	0.947984		-0.793612	0.437873		1.08031	0.427255		2.95873	0.00683545	upregulated	0.34831	0.846905
ASPWEDRAFT_160147	-1.96302	0.000687901	downregulated	0.462636	0.451416		-0.406787	0.49738		-0.1002	0.896018		0.746593	0.240035		1.77274	0.0013938	upregulated	0.636983	0.345849
ASPWEDRAFT_160447	-2.82842	3.80609e-06	downregulated	-0.766722	0.154015		0.278119	0.619028		-0.485089	0.417112		0.460507	0.580307		0.418563	0.6061		0.753096	0.362601
ASPWEDRAFT_163980	-3.4251	0.00015726	downregulated	0.0371632	0.962356		0.323648	0.642697		0.0114317	0.992396		0.96419	0.409652		2.18511	0.0197094	upregulated	3.06392	0.00102172	upregulated
ASPWEDRAFT_166871	-3.54766	0.00404176	downregulated	0.24337	0.824549		0.115428	0.914087		0.146728	0.904189		-0.721576	0.717489		-0.43417	0.816877		-0.392945	0.86391
ASPWEDRAFT_167086	-1.03493	0.0076454	downregulated	-0.569715	0.139914		-0.60383	0.101484		0.204554	0.653317		0.910101	0.0153121		-0.224812	0.59854		1.43847	7.45387e-05	upregulated
ASPWEDRAFT_167262	-5.2035	0.0066792	downregulated	-0.741835	0.62599		-2.76538	0.0606677		-1.77455	0.256164		4.06675	0.0375606	upregulated	4.36026	0.0187777	upregulated	1.5633	0.572726
ASPWEDRAFT_167517	-3.13241	0.000313743	downregulated	0.145049	0.880751		-0.653696	0.418568		0.145893	0.888254		1.53848	0.10555		2.0813	0.017058	upregulated	0.93721	0.39108
ASPWEDRAFT_167883	-1.26362	1.02356e-08	downregulated	-0.0919931	0.741399		-0.533505	0.015352		0.081514	0.779362		0.47845	0.0484664		0.538417	0.0201599		0.782407	0.000809779
ASPWEDRAFT_167938	-3.64769	1.15981e-06	downregulated	0.32942	0.695013		-1.07202	0.126122		-1.2592	0.0940561		0.63938	0.501038		0.258488	0.799866		0.322449	0.779886
ASPWEDRAFT_168091	-1.34593	4.30329e-07	downregulated	-0.620819	0.0232756		0.44033	0.103586		0.00602611	0.990061		1.46867	2.51767e-08	upregulated	1.55236	1.21841e-09	upregulated	1.00946	0.000236473	upregulated
ASPWEDRAFT_168100	-1.77332	0.0167528	downregulated	0.823722	0.231159		0.0247347	0.976953		0.301491	0.713772		0.211828	0.816143		1.23414	0.0869415		0.597597	0.497472
ASPWEDRAFT_168102	-2.12359	0.00290804	downregulated	0.088939	0.914246		-0.812665	0.227937		-0.330097	0.686069		-0.0201915	0.98353		1.08809	0.136341		0.381036	0.685432
ASPWEDRAFT_168171	-1.92102	5.23767e-05	downregulated	-0.301187	0.522343		0.330773	0.444264		-0.676621	0.144799		0.203711	0.75778		1.22491	0.0127887	upregulated	-1.36387	0.0761963
ASPWEDRAFT_168208	-3.13734	0.0269159	downregulated	-0.755751	0.486495		-1.70903	0.0962465		-1.59288	0.164637		-1.21938	0.575667		0.948368	0.568721		-0.877815	0.717278
ASPWEDRAFT_169327	-1.04172	2.61214e-05	downregulated	-0.251159	0.362526		0.0281566	0.927695		0.0457347	0.8959		1.82527	6.53144e-15	upregulated	1.39359	2.06666e-09	upregulated	1.97824	1.65958e-17	upregulated
ASPWEDRAFT_169346	-4.15279	0.000176984	downregulated	1.1235	0.35077		-1.08194	0.349492		-0.0582877	0.971451		0.950379	0.450153		4.30087	4.30041e-05	upregulated	1.10554	0.390061
ASPWEDRAFT_169441	-4.35065	0.0103273	downregulated	1.69706	0.0582919		1.4473	0.102217		0.436232	0.714647		1.22175	0.61594		0.946263	0.700421		1.56331	0.531812
ASPWEDRAFT_169761	-1.90353	0.0366466	downregulated	-0.26396	0.796988		0.0237044	0.982941		0.273098	0.795545		1.94286	0.0225613	upregulated	0.916426	0.309983		1.70176	0.0531633
ASPWEDRAFT_169778	-1.67312	8.81029e-06	downregulated	0.748265	0.0248322		-0.825447	0.0149165		-0.258538	0.530275		0.860881	0.0401732		1.32064	0.00049794	upregulated	0.448727	0.365545
ASPWEDRAFT_170169	-1.46778	0.0133865	downregulated	-0.29775	0.586079		-0.499773	0.319626		-0.0527422	0.938998		0.721341	0.288472		0.978649	0.106949		0.666542	0.366953
ASPWEDRAFT_170400	-1.34509	0.00669265	downregulated	-0.347758	0.494179		-0.594787	0.19647		-0.786853	0.111677		-0.237493	0.702277		0.819091	0.0997971		0.183229	0.792335
ASPWEDRAFT_170503	-3.41477	0.0460145	downregulated	-0.705812	0.575014		-0.78681	0.508686		-2.88512	0.0516899		1.54622	0.422494		3.11964	0.049563	upregulated	0.643729	0.804746
ASPWEDRAFT_170786	-1.07602	0.0139315	downregulated	0.406254	0.350158		-0.405887	0.33619		-0.395515	0.39609		0.346127	0.475284		0.781191	0.0641955		0.912647	0.0378798
ASPWEDRAFT_170942	-1.66148	0.00372593	downregulated	-0.72104	0.212502		-0.684113	0.220039		-0.612297	0.3219		-0.586477	0.360646		0.473156	0.446353		-0.157269	0.841231
ASPWEDRAFT_170959	-1.38988	3.38405e-05	downregulated	-0.309342	0.409872		-0.316718	0.375142		-0.453759	0.225681		-0.142655	0.72778		0.860031	0.0100083		-0.473842	0.210938
ASPWEDRAFT_171292	-2.67319	0.0313281	downregulated	-1.03987	0.20227		-0.89718	0.258368		0.293681	0.742304		2.10821	0.0980602		1.15375	0.410919		2.99826	0.0129175	upregulated
ASPWEDRAFT_171384	-3.47554	2.34574e-06	downregulated	-0.442333	0.604779		-0.0133226	0.988433		-0.0260035	0.982037		0.74673	0.392962		1.54161	0.0445105	upregulated	0.684439	0.458849
ASPWEDRAFT_171508	-1.37895	0.0470065	downregulated	0.952691	0.0751461		0.405612	0.482555		0.027206	0.974074		0.711881	0.351986		1.27389	0.0513422		0.273256	0.783101
ASPWEDRAFT_171544	-2.01808	3.42971e-05	downregulated	0.967963	0.0444376		0.0620651	0.915724		0.392499	0.482958		0.390263	0.502219		0.850326	0.0965118		0.450253	0.454536
ASPWEDRAFT_171549	-2.84608	0.0387331	downregulated	1.65303	0.0508913		-0.999092	0.30303		-0.434709	0.704263		1.84799	0.202809		2.60399	0.0433467	upregulated	-0.895162	0.703549
ASPWEDRAFT_171771	-2.24449	7.53937e-08	downregulated	0.916818	0.0316356		0.572355	0.182302		0.347811	0.484694		0.188472	0.725003		1.32309	0.00178686	upregulated	0.573938	0.246516
ASPWEDRAFT_172657	-2.60866	0.0401085	downregulated	-0.868364	0.374832		0.728564	0.411469		0.18089	0.878441		1.46654	0.288666		1.33016	0.321324		0.932447	0.573224
ASPWEDRAFT_173096	-1.72985	0.00220758	downregulated	0.517009	0.395641		0.212092	0.738838		0.423709	0.514724		1.30251	0.0197537	upregulated	2.41833	2.89792e-06	upregulated	1.64511	0.00287717	upregulated
ASPWEDRAFT_173175	-3.08828	0.000189502	downregulated	0.788361	0.351137		-1.24697	0.110748		-0.6515	0.47654		0.668319	0.498744		2.32886	0.00411165	upregulated	1.21665	0.196117
ASPWEDRAFT_173260	-1.32708	0.0141792	downregulated	-0.0908256	0.884146		0.733292	0.129347		-0.181537	0.772663		-0.719736	0.24129		-1.15245	0.0447293	downregulated	-0.967063	0.132075
ASPWEDRAFT_173541	-1.49643	0.000135426	downregulated	-0.735188	0.04745		-0.487701	0.186149		0.406467	0.312161		0.112805	0.833445		-0.422901	0.38182		0.544863	0.254994
ASPWEDRAFT_174044	-1.60225	1.97301e-07	downregulated	-0.640893	0.0455693		-0.786492	0.00961038		-0.574943	0.0884177		0.85291	0.00871343		0.969343	0.00186107		1.24089	9.13363e-05	upregulated
ASPWEDRAFT_174077	-2.52564	0.000626123	downregulated	1.01337	0.0962128		0.295406	0.661794		0.432504	0.545884		1.28788	0.118114		2.367	0.000914403	upregulated	1.53873	0.0620137
ASPWEDRAFT_174211	-1.12059	6.26416e-05	downregulated	-0.831202	0.00224597		-0.813622	0.00218271		-0.0689944	0.85252		0.449692	0.13995		0.339515	0.26375		0.719939	0.0141197
ASPWEDRAFT_174315	-1.65883	0.000267923	downregulated	-0.528376	0.258908		-0.254859	0.597381		-0.113399	0.844218		0.69048	0.166739		0.974439	0.0342378		0.725725	0.155397
ASPWEDRAFT_174848	-4.80307	1.42308e-07	downregulated	-1.17727	0.235512		-1.18482	0.212977		-0.0696093	0.95809		0.412439	0.72165		1.74697	0.0702535		0.887794	0.429625
ASPWEDRAFT_175044	-3.98051	0.00852448	downregulated	0.749759	0.545267		-1.44157	0.207417		-1.60181	0.203354		0.727436	0.713186		3.53573	0.0136549	upregulated	-0.855632	0.739538
ASPWEDRAFT_175133	-1.32336	0.00176543	downregulated	-0.79249	0.0584305		-0.106952	0.826665		-0.738207	0.0929636		0.33817	0.478095		1.42894	0.000316423	upregulated	0.0409971	0.946325
ASPWEDRAFT_175157	-1.22225	2.51725e-06	downregulated	0.471664	0.0837368		0.267086	0.336721		0.825573	0.00194437		0.882076	0.000836509		1.03791	4.30094e-05	upregulated	0.957327	0.000294126
ASPWEDRAFT_175365	-1.26966	0.00125006	downregulated	-0.237015	0.601229		-0.276079	0.510194		-0.612503	0.1424		-0.294579	0.507513		0.251502	0.568112		0.115315	0.827907
ASPWEDRAFT_175678	-2.17882	8.03909e-15	downregulated	-0.290804	0.357417		-0.209722	0.503861		0.123206	0.736795		1.22554	4.46303e-05	upregulated	1.39509	1.20247e-06	upregulated	1.53399	2.20999e-07	upregulated
ASPWEDRAFT_175779	-3.35834	0.00175582	downregulated	1.66791	0.0661901		0.563155	0.56662		1.01732	0.311722		3.11581	0.00314705	upregulated	4.01055	5.67874e-05	upregulated	3.137	0.00338275	upregulated
ASPWEDRAFT_175939	-1.73546	2.2859e-06	downregulated	-0.669162	0.0743863		0.365521	0.335879		-0.805398	0.0363705		1.18686	0.00177254	upregulated	2.0636	3.77067e-09	upregulated	0.0874001	0.873416
ASPWEDRAFT_176513	-4.82409	0.0142956	downregulated	1.04895	0.465169		0.323077	0.835436		0.768315	0.626962		1.22174	0.649556		4.53578	0.0145494	upregulated	0	1
ASPWEDRAFT_176819	-5.49855	0.0258239	downregulated	2.86128	0.2053		-2.96767	0.173088		-1.52424	0.5499		-1.81295	0.556426		5.55187	0.0137838	upregulated	-16.4387	6.24495e-11	downregulated
ASPWEDRAFT_176832	-2.63106	0.000435561	downregulated	-0.715374	0.293266		1.12978	0.0596569		0.651347	0.354375		0.476924	0.626572		-0.425599	0.682775		0.279975	0.814132
ASPWEDRAFT_177356	-1.01017	0.0337176	downregulated	0.847952	0.0563491		0.469701	0.299932		-0.565391	0.245039		-0.174003	0.742689		1.30651	0.0020458	upregulated	0.176841	0.760811
ASPWEDRAFT_177463	-5.63322	2.43028e-09	downregulated	0.165617	0.896251		-1.82979	0.0604036		-0.176935	0.897921		2.16904	0.032992	upregulated	3.22246	0.000762109	upregulated	2.10379	0.0427295	upregulated
ASPWEDRAFT_177467	-5.64444	5.24218e-07	downregulated	1.39247	0.262991		-0.909549	0.466692		0.59511	0.679647		2.40025	0.0452059	upregulated	4.44052	5.95666e-05	upregulated	2.42819	0.0458672	upregulated
ASPWEDRAFT_177469	-4.12285	1.11449e-15	downregulated	-0.136726	0.834021		-0.329353	0.559295		0.45429	0.445773		1.18974	0.0447889	upregulated	2.20125	3.78905e-05	upregulated	1.20839	0.0466338	upregulated
ASPWEDRAFT_177490	-1.57312	9.80042e-07	downregulated	0.0656706	0.875906		0.463498	0.157988		0.623267	0.0710711		0.642199	0.0649811		0.229241	0.547603		1.4853	4.48436e-06	upregulated
ASPWEDRAFT_177523	-5.34072	0.0006005	downregulated	2.55205	0.104347		-1.85481	0.2348		-2.38094	0.149218		0.517296	0.783274		7.26165	4.51076e-07	upregulated	-1.03037	0.601476
ASPWEDRAFT_177714	-2.48555	0.000191196	downregulated	-0.770113	0.283534		0.618878	0.378658		0.703246	0.354351		1.53063	0.0239934	upregulated	-0.174964	0.831083		1.22028	0.084234
ASPWEDRAFT_177828	-1.4516	0.049263	downregulated	0.902806	0.143377		-0.0295504	0.968857		0.986947	0.123743		0.256204	0.772478		-0.54883	0.527286		0.592867	0.498504
ASPWEDRAFT_178345	-1.18364	1.01587e-05	downregulated	-0.777344	0.00341268		-0.579161	0.0281262		-0.663543	0.0182285		0.698258	0.0120785		0.677986	0.0122465		0.48098	0.104586
ASPWEDRAFT_179880	-1.89593	5.65197e-05	downregulated	-0.976711	0.0269176		-0.389099	0.395549		-0.829289	0.0792354		-0.0583832	0.93361		0.0416313	0.953792		0.626806	0.280062
ASPWEDRAFT_181481	-2.16266	1.58558e-05	downregulated	-0.090221	0.887357		-0.469551	0.372289		-0.149375	0.817142		-1.20141	0.0329167	downregulated	-0.774704	0.163315		-0.775552	0.197627
ASPWEDRAFT_181783	-1.1072	0.0114788	downregulated	0.233034	0.627674		-0.352179	0.418696		-0.274928	0.577119		0.643023	0.150721		1.37483	0.000581616	upregulated	0.896966	0.0405856
ASPWEDRAFT_181876	-1.05571	0.00134142	downregulated	0.0510677	0.901588		0.306138	0.36675		-0.409857	0.25381		0.689229	0.0378145		2.04469	5.02356e-12	upregulated	0.614365	0.0730565
ASPWEDRAFT_181996	-1.08339	0.0112646	downregulated	-0.773404	0.0506499		0.0178271	0.97001		-0.282136	0.541989		0.895823	0.0361359		0.597843	0.16919		0.58157	0.221719
ASPWEDRAFT_182673	-4.36625	0.00251834	downregulated	0.821435	0.550681		-1.15683	0.362957		-1.76463	0.188639		0.784061	0.664922		2.61674	0.0705872		0.313778	0.889671
ASPWEDRAFT_182687	-5.87226	8.48709e-05	downregulated	-0.613173	0.398952		0.15109	0.845019		-0.869287	0.251583		1.15567	0.603136		2.97899	0.0649558		1.49542	0.512245
ASPWEDRAFT_182725	-3.15788	4.37228e-06	downregulated	-0.147252	0.842088		0.937247	0.100285		0.844813	0.17914		1.09973	0.179261		2.23016	0.0013812	upregulated	1.14365	0.177608
ASPWEDRAFT_182797	-1.65441	0.00912778	downregulated	-1.01177	0.103402		-0.743889	0.226873		-0.842193	0.203354		0.565932	0.40751		0.700902	0.277311		0.957894	0.144542
ASPWEDRAFT_183428	-3.41492	3.62994e-10	downregulated	0.402496	0.325618		-0.1624	0.712589		0.375677	0.391267		1.2148	0.0724385		1.23477	0.053272		1.03843	0.162294
ASPWEDRAFT_184180	-3.76478	3.40041e-08	downregulated	0.57998	0.383543		-0.609433	0.341648		-0.142851	0.861904		1.74413	0.0211707	upregulated	2.19798	0.00184375	upregulated	2.14622	0.00410742	upregulated
ASPWEDRAFT_184401	-1.75487	8.81029e-06	downregulated	0.756759	0.0596551		-0.590437	0.137979		0.534552	0.219556		1.54345	9.33744e-05	upregulated	0.589645	0.164011		1.27483	0.00174367	upregulated
ASPWEDRAFT_185170	-1.82188	0.000997123	downregulated	0.737307	0.092188		-0.70792	0.126067		0.628163	0.186494		0.925739	0.144353		0.107969	0.892427		0.885745	0.189429
ASPWEDRAFT_185195	-4.3823	1.43102e-15	downregulated	0.256414	0.618994		-0.968571	0.0251097		0.382157	0.454452		1.75474	0.00586861	upregulated	0.280977	0.736069		1.64356	0.0137504	upregulated
ASPWEDRAFT_185315	-2.52823	7.57806e-05	downregulated	1.15561	0.0734301		-0.74566	0.251575		-0.128852	0.881866		0.915535	0.190728		1.68973	0.00751906	upregulated	1.27853	0.0617707
ASPWEDRAFT_186159	-4.61449	2.30498e-05	downregulated	-0.247182	0.861225		-0.801193	0.500978		-1.77665	0.13385		0.533836	0.687547		4.6809	7.18074e-06	upregulated	0.483601	0.739624
ASPWEDRAFT_186160	-3.46899	0.010537	downregulated	-1.44957	0.183129		-1.0228	0.340111		-1.07462	0.364636		0.608172	0.731708		1.57365	0.277404		1.19733	0.485425
ASPWEDRAFT_186163	-5.75601	5.01017e-12	downregulated	-0.47064	0.574315		-0.874093	0.238146		-0.942495	0.240617		0.626603	0.590778		3.34159	0.000103303	upregulated	0.4264	0.757864
ASPWEDRAFT_186212	-1.80294	0.00201434	downregulated	0.336821	0.492335		0.055684	0.918588		0.492841	0.321071		1.32866	0.0330544	upregulated	1.79204	0.00147249	upregulated	1.50412	0.0177074	upregulated
ASPWEDRAFT_187652	-3.87286	0.0210456	downregulated	0.467974	0.62841		1.49547	0.0545423		-2.44574	0.0619158		3.59219	0.0288845	upregulated	5.31431	0.000346761	upregulated	-0.360273	0.90099
ASPWEDRAFT_188343	-1.14935	0.00977115	downregulated	0.819468	0.0335564		-0.862399	0.0290226		0.694892	0.0921931		1.06216	0.0161461	upregulated	0.294999	0.561127		1.58177	0.000205925	upregulated
ASPWEDRAFT_192530	-5.15224	1.67101e-40	downregulated	-0.596579	0.133521		0.379621	0.34231		0.0692467	0.896018		2.98738	2.48299e-13	upregulated	3.40842	5.18006e-18	upregulated	2.97241	4.63094e-13	upregulated
ASPWEDRAFT_193112	-1.04202	0.00178724	downregulated	-0.456379	0.18377		-0.0706381	0.85753		0.375285	0.305752		0.365251	0.311414		0.270214	0.456836		1.09695	0.000694666	upregulated
ASPWEDRAFT_193946	-1.08534	0.0333129	downregulated	0.20827	0.662148		0.252008	0.567578		-0.443374	0.372151		0.823834	0.12157		1.16087	0.0146335	upregulated	1.00294	0.061792
ASPWEDRAFT_194392	-1.19079	4.0499e-05	downregulated	-0.683504	0.0197738		-0.921767	0.000881378		-0.650201	0.0332516		0.163183	0.638016		0.158383	0.643624		0.301782	0.372376
ASPWEDRAFT_225587	-2.3967	2.25594e-12	downregulated	-0.0341651	0.936313		-0.419204	0.219305		-0.0634334	0.890312		0.489035	0.252185		0.47898	0.242655		0.929998	0.0204616
ASPWEDRAFT_226450	-2.43557	5.37399e-09	downregulated	-0.237068	0.627614		-0.345488	0.435643		0.702061	0.112255		0.637728	0.195115		0.224462	0.677372		0.155255	0.80879
ASPWEDRAFT_22926	-1.80363	2.50643e-05	downregulated	0.765391	0.0637853		-0.176392	0.706237		0.00186504	0.998184		0.245182	0.6524		1.30835	0.0022073	upregulated	-1.02778	0.0620693
ASPWEDRAFT_22955	-2.53937	9.31268e-09	downregulated	0.612781	0.206104		-0.951731	0.0330089		-0.0386585	0.953339		0.853804	0.0802504		0.988736	0.0338986		0.788354	0.117903
ASPWEDRAFT_23301	-1.47269	0.00932849	downregulated	-0.587038	0.316684		-0.100366	0.877249		0.176756	0.798108		1.16329	0.0345684	upregulated	0.531646	0.363486		1.39423	0.0110113	upregulated
ASPWEDRAFT_234135	-7.15818	0.000109134	downregulated	-0.953813	0.509256		-0.242598	0.874291		2.24788	0.0939323		5.43577	0.0035847	upregulated	3.25398	0.0980167		5.23018	0.00599207	upregulated
ASPWEDRAFT_23482	-1.04167	0.0233854	downregulated	0.719866	0.0776494		0.372319	0.379118		-0.837997	0.0607143		1.23717	0.00434319	upregulated	1.11473	0.00862698	upregulated	0.10942	0.86391
ASPWEDRAFT_23679	-2.07049	1.47654e-06	downregulated	-0.217626	0.662504		-0.136622	0.779378		0.0172938	0.978813		0.516149	0.315017		0.309187	0.557208		0.808499	0.104208
ASPWEDRAFT_23928	-1.24292	0.0490958	downregulated	0.00391195	0.996388		-0.765286	0.189432		-0.696928	0.278436		-0.528806	0.414036		1.13202	0.0493714	upregulated	-0.070024	0.932031
ASPWEDRAFT_23938	-1.20407	0.00103011	downregulated	0.72438	0.0479704		-0.847515	0.0147693		0.38678	0.346267		0.261461	0.529649		0.284518	0.481065		0.509913	0.198797
ASPWEDRAFT_24273	-3.45288	4.79734e-07	downregulated	0.886688	0.229855		1.05514	0.129444		-0.6378	0.428557		1.71823	0.0178693	upregulated	3.62098	4.27752e-08	upregulated	0.989674	0.213293
ASPWEDRAFT_24590	-2.07014	0.0251132	downregulated	0.998794	0.219912		0.930301	0.237907		-0.601783	0.522299		0.606584	0.567971		2.65089	0.00138189	upregulated	-1.16822	0.366743
ASPWEDRAFT_25563	-1.01181	0.0471632	downregulated	0.556024	0.261295		0.440422	0.365978		0.49493	0.346934		0.0944701	0.872266		1.22118	0.00721542	upregulated	0.00181801	1
ASPWEDRAFT_25609	-5.48514	6.02576e-15	downregulated	0.726729	0.310286		-1.17166	0.0736418		-0.073083	0.939138		1.73618	0.0312597	upregulated	3.9363	2.82346e-08	upregulated	-0.379259	0.753888
ASPWEDRAFT_25610	-1.089	0.0192064	downregulated	0.140555	0.795273		-0.406329	0.375636		0.222744	0.679811		-0.434972	0.373717		0.28978	0.558467		-0.0584157	0.924091
ASPWEDRAFT_267935	-1.97663	0.00141475	downregulated	-0.485818	0.352757		0.801203	0.0711698		-0.963338	0.0829871		0.868077	0.238238		2.89867	2.53335e-07	upregulated	-0.134329	0.906519
ASPWEDRAFT_26949	-3.38797	2.74408e-08	downregulated	-1.00605	0.0739025		-0.803586	0.145014		-1.11491	0.0574575		-0.273675	0.765564		1.8534	0.0037656	upregulated	-0.924521	0.350755
ASPWEDRAFT_271934	-3.35392	5.03561e-16	downregulated	-0.239752	0.651183		-0.504393	0.271991		-0.302038	0.571692		-0.132962	0.810128		0.387621	0.4345		-0.0106902	0.991003
ASPWEDRAFT_27369	-3.85892	0.00463144	downregulated	0.450226	0.772631		-1.32066	0.316731		-1.48185	0.298344		1.28088	0.393131		4.11855	0.00113991	upregulated	0.803285	0.632974
ASPWEDRAFT_27587	-1.75584	6.72987e-05	downregulated	-0.165502	0.754318		-0.462456	0.302043		0.734505	0.108801		-0.0213564	0.972676		0.729417	0.115512		0.199001	0.74223
ASPWEDRAFT_278070	-3.01507	5.60356e-07	downregulated	-0.429109	0.533963		0.106739	0.882174		-0.296265	0.69176		1.11003	0.0958057		3.56291	6.07349e-10	upregulated	0.139082	0.878264
ASPWEDRAFT_285619	-1.40266	0.00602302	downregulated	0.615116	0.236734		-0.431414	0.405125		-0.194178	0.755833		-0.00997515	0.988331		0.180189	0.761297		-0.305905	0.615553
ASPWEDRAFT_28756	-4.54994	2.02228e-27	downregulated	0.0473859	0.936407		-0.876727	0.0520652		0.627199	0.216281		1.90403	2.06354e-05	upregulated	1.35546	0.00242892	upregulated	1.95046	1.38507e-05	upregulated
ASPWEDRAFT_287930	-3.96728	0.0160903	downregulated	1.02709	0.203765		-0.475237	0.611049		0.319636	0.757379		2.73503	0.119337		2.92923	0.0743611		2.08014	0.304878
ASPWEDRAFT_288424	-1.7523	3.15156e-07	downregulated	-0.429225	0.234301		-0.373505	0.2886		-0.602776	0.100231		-0.08792	0.853654		0.869031	0.0153161		-0.241674	0.616277
ASPWEDRAFT_28919	-2.89244	0.00301781	downregulated	-0.274719	0.720623		-0.750929	0.267924		-0.111559	0.900189		1.84299	0.0818133		2.08996	0.0339292	upregulated	2.08297	0.0516242
ASPWEDRAFT_29203	-1.30348	0.00069499	downregulated	-0.47518	0.236757		0.601376	0.108819		-0.372791	0.39005		-0.496761	0.236149		0.18394	0.682908		-0.602532	0.153697
ASPWEDRAFT_29710	-2.66191	0.00708451	downregulated	0.365414	0.675348		-1.38328	0.0765705		0.133222	0.897073		0.855814	0.477478		1.59866	0.116385		1.3778	0.23201
ASPWEDRAFT_29803	-1.71723	6.5026e-05	downregulated	-0.220082	0.672286		-0.700764	0.10426		-0.53088	0.272517		0.368165	0.453737		1.4288	0.000601476	upregulated	0.19909	0.722185
ASPWEDRAFT_29985	-1.71077	0.00895336	downregulated	0.197869	0.796006		-0.91275	0.141112		-0.778768	0.258387		0.267103	0.724535		1.58316	0.00977925	upregulated	-0.162202	0.853029
ASPWEDRAFT_30370	-1.46372	0.000132874	downregulated	-0.883628	0.0218535		0.0722866	0.876503		-0.259104	0.574974		1.28659	0.000673698	upregulated	1.66442	4.12453e-06	upregulated	0.490153	0.25124
ASPWEDRAFT_30608	-1.83717	8.1755e-06	downregulated	-0.292871	0.523251		-0.120697	0.79823		-0.0963092	0.85867		0.100897	0.857407		-0.178897	0.738794		1.1488	0.00916273	upregulated
ASPWEDRAFT_307772	-3.30463	3.85509e-08	downregulated	0.461646	0.455294		0.229606	0.717567		0.25326	0.716455		1.84504	0.00433548	upregulated	1.92945	0.00190451	upregulated	1.04762	0.153297
ASPWEDRAFT_307847	-1.39776	0.000158936	downregulated	0.143353	0.746726		-0.800446	0.0235388		-0.942047	0.0124755		0.418648	0.318343		0.482655	0.224243		0.284557	0.540022
ASPWEDRAFT_30786	-1.19906	0.0303148	downregulated	-0.241305	0.670533		-0.0422925	0.941984		-0.982921	0.0645927		0.316908	0.624319		1.75259	0.000351461	upregulated	-0.170775	0.833297
ASPWEDRAFT_31168	-2.63005	0.00275533	downregulated	1.0345	0.238864		-0.175167	0.860717		-1.21943	0.181572		-0.0872182	0.940841		2.73742	0.000870285	upregulated	-0.0450257	0.97465
ASPWEDRAFT_31175	-2.17381	0.00447228	downregulated	-0.534751	0.506654		-0.460139	0.552738		-1.05346	0.178268		1.17863	0.140226		0.844014	0.293713		0.688723	0.443963
ASPWEDRAFT_31479	-6.03743	0.000933248	downregulated	0.584035	0.67835		-1.36533	0.26874		-2.11966	0.108461		2.46032	0.242586		5.18887	0.00310757	upregulated	1.49779	0.566079
ASPWEDRAFT_314947	-1.69048	2.65948e-10	downregulated	-0.484555	0.092338		0.294417	0.310562		0.255355	0.428755		0.655535	0.0246648		0.945626	0.000559699		1.15435	3.58719e-05	upregulated
ASPWEDRAFT_32053	-1.6385	4.54909e-07	downregulated	0.568179	0.101856		0.118894	0.760931		0.498251	0.175019		1.33543	4.46303e-05	upregulated	1.69157	6.65379e-08	upregulated	1.2489	0.00016267	upregulated
ASPWEDRAFT_32421	-1.71071	0.000308043	downregulated	0.502976	0.322257		0.474219	0.331884		-0.863679	0.0838674		0.114277	0.848581		1.6371	0.000297467	upregulated	0.296528	0.616277
ASPWEDRAFT_32466	-1.11104	0.00218736	downregulated	-0.164824	0.694043		0.246664	0.509884		-0.11522	0.795488		0.271949	0.512451		1.45411	1.36046e-05	upregulated	0.267427	0.545828
ASPWEDRAFT_33273	-2.46941	0.00695822	downregulated	-0.622649	0.399271		0.032591	0.968137		-0.816503	0.300438		0.231885	0.862238		0.628849	0.576761		0.936051	0.430574
ASPWEDRAFT_33357	-2.27341	2.47303e-07	downregulated	-0.0963844	0.864366		-0.454516	0.320952		0.0630234	0.918715		-0.440561	0.427674		-0.419507	0.434999		-0.61036	0.284324
ASPWEDRAFT_33492	-2.86968	1.0552e-05	downregulated	0.174469	0.817066		0.17212	0.809454		0.54869	0.428755		1.66717	0.0161112	upregulated	2.57398	5.19456e-05	upregulated	1.83886	0.00835003	upregulated
ASPWEDRAFT_34259	-3.9149	3.48213e-11	downregulated	-0.676235	0.122175		-0.403543	0.361469		-0.266421	0.602264		1.53715	0.0300315	upregulated	3.04344	4.12916e-07	upregulated	1.47737	0.0483891	upregulated
ASPWEDRAFT_34262	-1.95971	0.00133678	downregulated	0.274463	0.672235		-0.38718	0.517043		0.612419	0.315509		1.7968	0.00312105	upregulated	2.22362	0.000105695	upregulated	0.837372	0.239839
ASPWEDRAFT_34275	-4.42434	0.00283381	downregulated	-1.34447	0.249859		0.300768	0.813098		1.99635	0.0761754		2.3419	0.143283		-0.530113	0.81507		0.630601	0.784748
ASPWEDRAFT_34391	-1.18951	0.0220833	downregulated	0.682315	0.172332		0.657874	0.171868		0.58173	0.275564		-0.776443	0.147815		0.263218	0.644996		-0.88226	0.10718
ASPWEDRAFT_345210	-1.06346	0.0255251	downregulated	-0.0606542	0.914246		-0.0400261	0.941496		0.920169	0.0475582		1.02502	0.0225456	upregulated	0.577667	0.212631		1.81391	2.51806e-05	upregulated
ASPWEDRAFT_34669	-2.40567	0.000436056	downregulated	-0.794345	0.270342		0.0127277	0.987978		1.149	0.108461		1.82751	0.00749683	upregulated	0.528874	0.491148		2.33178	0.000532716	upregulated
ASPWEDRAFT_34695	-2.61209	0.000955299	downregulated	0.396193	0.618346		-0.170977	0.833434		-0.21676	0.806474		1.20533	0.170401		2.14279	0.00552274	upregulated	1.28499	0.153855
ASPWEDRAFT_35220	-1.3413	0.00198517	downregulated	-0.588367	0.164814		-0.201987	0.654196		-0.760585	0.0827514		0.604929	0.202814		1.68058	3.0007e-05	upregulated	0.386081	0.46942
ASPWEDRAFT_35458	-1.85943	3.38874e-06	downregulated	-0.315107	0.500037		0.395036	0.361127		-0.58934	0.190877		0.061434	0.908519		0.759115	0.067578		0.986146	0.0196154
ASPWEDRAFT_35603	-2.35312	0.0290391	downregulated	0.23417	0.806428		-0.442595	0.61447		0.0627702	0.955088		1.54864	0.172667		2.80621	0.00391671	upregulated	1.6441	0.1592
ASPWEDRAFT_35621	-1.13547	0.01146	downregulated	-0.207604	0.681454		-0.50251	0.245959		-0.00278111	0.997144		0.359055	0.463516		0.606311	0.17425		0.530065	0.272675
ASPWEDRAFT_35745	-1.95284	0.0157361	downregulated	-0.309527	0.702647		-1.22637	0.0759701		-0.638448	0.422067		-1.14208	0.302063		0.515662	0.581189		-0.207227	0.869972
ASPWEDRAFT_35754	-2.37568	1.14011e-05	downregulated	0.028014	0.962252		-0.321302	0.534335		-0.193163	0.750574		0.72373	0.273779		1.31429	0.021352	upregulated	0.605553	0.403926
ASPWEDRAFT_358665	-1.11048	0.0211065	downregulated	0.546248	0.254972		0.837409	0.0572041		-0.905792	0.0559952		-0.583593	0.234264		0.925691	0.0395318		-0.297063	0.591958
ASPWEDRAFT_35879	-1.55286	7.47442e-05	downregulated	-0.165275	0.697267		-0.224675	0.56221		-0.374713	0.362822		0.318413	0.525171		0.684503	0.10951		0.816997	0.0724809
ASPWEDRAFT_36444	-6.11815	7.51325e-24	downregulated	0.31159	0.673442		-0.970027	0.114933		0.68054	0.329416		3.0648	2.13568e-06	upregulated	3.65186	3.65417e-09	upregulated	2.8117	1.88769e-05	upregulated
ASPWEDRAFT_36552	-2.2047	1.74512e-08	downregulated	-0.499424	0.224012		-0.989535	0.00816759		-0.473628	0.276133		0.179111	0.732664		0.848911	0.0444929		0.702302	0.131765
ASPWEDRAFT_36643	-1.30246	0.000125715	downregulated	-0.839332	0.0107295		-0.2786	0.427717		-0.640851	0.0702959		0.295594	0.462502		1.28372	8.69963e-05	upregulated	0.630707	0.0949684
ASPWEDRAFT_369058	-3.00061	1.17892e-05	downregulated	1.19201	0.0972965		-1.13338	0.102564		0.116256	0.904498		1.23697	0.0910898		2.16476	0.00133315	upregulated	1.1495	0.127261
ASPWEDRAFT_37995	-1.42287	2.78942e-05	downregulated	-0.674976	0.0500611		-0.91194	0.00497119		-0.350515	0.365893		0.591809	0.108515		0.497131	0.171098		1.24794	0.000280797	upregulated
ASPWEDRAFT_38192	-1.48465	1.03801e-09	downregulated	-0.40011	0.130717		0.62723	0.0100366		-0.058648	0.864792		0.649723	0.0130071		0.295056	0.285541		0.606539	0.0235801
ASPWEDRAFT_38707	-3.00117	2.94423e-06	downregulated	-0.828625	0.221101		0.906348	0.156545		-0.0532897	0.953521		-1.34409	0.0792807		0.338862	0.669955		-1.18249	0.141713
ASPWEDRAFT_38721	-2.11811	9.53336e-09	downregulated	-0.559463	0.167408		-0.895596	0.0162153		-0.569601	0.177479		0.202015	0.660203		-0.058425	0.906764		0.614361	0.144083
ASPWEDRAFT_38788	-1.11365	0.000603687	downregulated	-0.21493	0.543159		0.462404	0.128196		0.0756859	0.853958		0.351425	0.347848		0.361667	0.310877		0.202654	0.635933
ASPWEDRAFT_38790	-2.93189	3.28052e-14	downregulated	-0.683073	0.0846474		-0.296734	0.474195		0.0795303	0.880273		0.60918	0.198631		0.132112	0.808208		0.773312	0.102355
ASPWEDRAFT_39157	-1.00236	0.0293668	downregulated	-0.448359	0.330821		-0.862303	0.0371408		-0.693311	0.130099		-0.610362	0.189989		-0.233095	0.641122		0.125598	0.83161
ASPWEDRAFT_391576	-1.2378	0.00282694	downregulated	0.635289	0.128114		0.37906	0.371056		0.490475	0.274668		0.415571	0.354918		1.3375	0.000537619	upregulated	0.928891	0.0254596
ASPWEDRAFT_39180	-1.39162	1.53089e-06	downregulated	-0.287021	0.369197		-0.33267	0.26912		-0.193819	0.581389		0.819759	0.00692733		1.61381	5.64737e-09	upregulated	-0.338229	0.348215
ASPWEDRAFT_39575	-2.22525	0.00028031	downregulated	-1.01557	0.0929045		-0.420618	0.507267		-0.613958	0.359465		-0.695201	0.351946		0.529175	0.448529		0.228375	0.79417
ASPWEDRAFT_39629	-1.47099	0.041343	downregulated	0.000424777	1		-1.21161	0.0619043		-1.14851	0.103504		-0.161603	0.84449		1.50801	0.0207693	upregulated	-0.220557	0.80443
ASPWEDRAFT_39645	-2.61775	0.000155493	downregulated	-0.998676	0.170637		-0.435608	0.568909		-0.334637	0.699855		0.877813	0.243433		1.00876	0.160972		1.44694	0.0454643	upregulated
ASPWEDRAFT_39837	-6.46284	3.22238e-11	downregulated	0.860813	0.450258		-0.307499	0.798188		0.130952	0.928381		3.42581	0.000814972	upregulated	4.56331	2.7991e-06	upregulated	3.16199	0.00236544	upregulated
ASPWEDRAFT_400419	-1.19004	0.0401925	downregulated	-0.128211	0.845877		-0.536894	0.324323		-0.362025	0.562859		0.080659	0.909578		0.972554	0.0722197		0.810336	0.169448
ASPWEDRAFT_40189	-2.06575	0.0284741	downregulated	-0.0380554	0.96533		-0.353614	0.654511		-0.40096	0.650775		0.0565523	0.968089		0.812429	0.439982		0.603875	0.635933
ASPWEDRAFT_40291	-2.54502	2.76731e-05	downregulated	0.142635	0.825688		-0.99764	0.0560981		-0.75661	0.196765		0.708771	0.34885		1.90522	0.00181952	upregulated	0.792782	0.312311
ASPWEDRAFT_40360	-1.11251	0.0104574	downregulated	0.907012	0.0141672		-0.374182	0.358854		-0.169984	0.730415		1.04426	0.0153808	upregulated	1.28274	0.00145625	upregulated	1.10822	0.011668	upregulated
ASPWEDRAFT_40572	-2.50588	8.8356e-08	downregulated	0.0788035	0.897342		-0.970267	0.0385646		-0.548131	0.311493		0.307544	0.59454		0.897558	0.0715764		0.894886	0.0892142
ASPWEDRAFT_40573	-1.62342	0.000220296	downregulated	0.283293	0.566399		-0.721232	0.0903378		0.332666	0.50734		-0.364764	0.488242		-0.24032	0.650918		0.317654	0.567262
ASPWEDRAFT_40721	-1.45044	6.53534e-05	downregulated	-0.974385	0.00691367		-0.721848	0.0437793		0.164102	0.722391		1.08221	0.00295825	upregulated	0.857368	0.0177199		1.45229	4.95095e-05	upregulated
ASPWEDRAFT_41044	-2.90247	0.00488354	downregulated	0.945704	0.352182		-0.547922	0.597146		0.896474	0.402704		1.10541	0.328631		3.57658	0.000157134	upregulated	1.70543	0.117478
ASPWEDRAFT_41046	-1.346	0.000398571	downregulated	-0.348405	0.361773		-0.729809	0.0355256		0.0452559	0.927828		0.968911	0.0147476		0.448225	0.290594		1.8281	8.22346e-07	upregulated
ASPWEDRAFT_41090	-2.39179	1.36872e-05	downregulated	0.160128	0.817066		-0.519492	0.372052		-0.421871	0.517077		1.89412	0.000629059	upregulated	2.34098	9.76443e-06	upregulated	1.8444	0.00100365	upregulated
ASPWEDRAFT_41169	-1.71831	2.3828e-06	downregulated	0.662527	0.0409042		-0.465551	0.166694		0.828797	0.0120758		0.72568	0.0855498		0.173737	0.725596		0.569947	0.218845
ASPWEDRAFT_41261	-1.81231	1.48179e-05	downregulated	-0.683882	0.121553		0.773052	0.0646566		-0.545993	0.248995		0.198618	0.697743		0.762016	0.0784784		-0.382215	0.448861
ASPWEDRAFT_41314	-1.43279	0.00701885	downregulated	-0.228409	0.699598		0.324843	0.539956		-0.527875	0.348082		0.193114	0.764208		-0.273881	0.663233		0.254529	0.713788
ASPWEDRAFT_41318	-1.30657	0.0202105	downregulated	-0.547068	0.340502		0.917406	0.0770868		-0.0097793	0.991979		0.60695	0.294111		-0.220818	0.726448		0.80657	0.157319
ASPWEDRAFT_41403	-5.20083	4.65905e-15	downregulated	0.373473	0.627845		-0.756279	0.261777		0.840012	0.246881		2.62827	0.000217241	upregulated	1.85215	0.00989474	upregulated	3.01027	2.08328e-05	upregulated
ASPWEDRAFT_41607	-2.10568	0.0406188	downregulated	-0.528332	0.528674		-0.594688	0.455049		-0.0626485	0.952427		1.55908	0.143283		1.69883	0.0878751		1.69843	0.11904
ASPWEDRAFT_41628	-1.8473	7.71262e-06	downregulated	0.153822	0.763305		0.413237	0.339547		0.325646	0.503185		0.777143	0.0813846		1.08994	0.00893497	upregulated	0.810299	0.0742822
ASPWEDRAFT_42064	-1.81217	0.00637629	downregulated	0.875172	0.192927		-0.0715165	0.927492		-0.0536711	0.953339		0.642749	0.365508		1.9902	0.00117308	upregulated	0.742068	0.30075
ASPWEDRAFT_42102	-1.24344	7.02946e-06	downregulated	-0.221313	0.47492		-0.0511106	0.877186		-0.35506	0.249486		0.348382	0.275383		0.383498	0.205892		0.49964	0.11176
ASPWEDRAFT_42186	-1.73187	6.63081e-07	downregulated	-0.268547	0.514181		-0.267117	0.493502		-0.806759	0.031156		-0.0488526	0.91658		0.851006	0.016659		-0.174044	0.707136
ASPWEDRAFT_42561	-2.13291	0.000266802	downregulated	-0.551814	0.336898		0.374718	0.506005		-0.286653	0.660308		0.729578	0.286231		0.0651914	0.939467		-0.657248	0.439476
ASPWEDRAFT_42562	-2.31148	0.0132523	downregulated	-0.46825	0.547594		-1.01276	0.157769		-0.519355	0.531632		1.05198	0.331482		2.37277	0.00672225	upregulated	0.977341	0.40663
ASPWEDRAFT_42611	-2.33031	0.0260365	downregulated	-0.54786	0.526727		-1.07878	0.179051		0.322054	0.730415		1.44611	0.198589		-1.03944	0.494424		1.85892	0.092982
ASPWEDRAFT_42641	-5.1275	9.35424e-05	downregulated	0.765633	0.622996		-2.25605	0.0841737		-1.58055	0.285025		0.4456	0.780506		5.47609	1.08034e-05	upregulated	1.03598	0.512341
ASPWEDRAFT_42706	-4.84355	0.00031419	downregulated	1.22337	0.211379		-1.76567	0.0631854		1.24264	0.223973		3.123	0.0261903	upregulated	3.31911	0.0135226	upregulated	3.22327	0.0241753	upregulated
ASPWEDRAFT_42860	-1.34789	0.00396185	downregulated	0.934576	0.0280804		0.9327	0.0229851		-0.500775	0.309146		-0.234994	0.685539		1.36922	0.0018844	upregulated	-0.240768	0.707251
ASPWEDRAFT_42889	-2.18385	4.53282e-06	downregulated	0.820453	0.0563196		-0.219268	0.650052		0.391486	0.428755		0.879956	0.109512		1.62461	0.000737126	upregulated	1.56753	0.0022555	upregulated
ASPWEDRAFT_42938	-2.40573	0.036312	downregulated	1.80977	0.0899256		-0.174182	0.889365		-0.899073	0.459723		0.289064	0.826774		1.78726	0.0977692		-0.194833	0.89851
ASPWEDRAFT_43348	-1.48856	2.38659e-06	downregulated	-0.721488	0.0251051		-0.777074	0.0118532		0.174381	0.658075		0.889247	0.00669766		0.951617	0.00263038		0.903814	0.00650935
ASPWEDRAFT_434047	-1.30512	6.8974e-05	downregulated	-0.157775	0.688822		0.14974	0.686233		-0.849267	0.0117628		0.197002	0.617406		0.481172	0.164657		0.519801	0.153275
ASPWEDRAFT_434472	-1.59667	0.00928157	downregulated	-0.0824334	0.906764		-0.778523	0.166839		-0.700888	0.263034		-0.349498	0.644933		1.56415	0.0066981	upregulated	-0.181943	0.838857
ASPWEDRAFT_43466	-2.85871	3.3866e-06	downregulated	0.071439	0.929365		0.441447	0.518996		-0.0239011	0.980559		0.607886	0.393386		2.0763	0.00063421	upregulated	0.390039	0.619756
ASPWEDRAFT_43485	-2.68871	5.81887e-09	downregulated	-0.396046	0.344118		0.856351	0.0172147		0.581386	0.155965		1.99355	5.197e-05	upregulated	1.66353	0.00065609	upregulated	1.63613	0.00182808	upregulated
ASPWEDRAFT_44079	-1.5354	0.000261658	downregulated	-0.198837	0.670346		-0.124008	0.785917		0.357016	0.426187		0.553927	0.250949		0.0908502	0.872373		0.796462	0.0931199
ASPWEDRAFT_44332	-1.35389	2.02993e-05	downregulated	-0.310839	0.37357		-0.404216	0.213946		0.10909	0.788214		0.212899	0.576747		0.130214	0.741831		0.926815	0.00499577
ASPWEDRAFT_44605	-1.66648	0.00027504	downregulated	0.98659	0.031989		0.826246	0.0658295		0.356658	0.506695		1.47578	0.00106802	upregulated	1.80613	2.97891e-05	upregulated	1.5577	0.000569327	upregulated
ASPWEDRAFT_446669	-1.19561	1.75424e-07	downregulated	-0.72237	0.00168887		0.291922	0.226901		-0.500431	0.0440447		0.371926	0.145318		0.82256	0.000324911		1.00611	1.57524e-05	upregulated
ASPWEDRAFT_44679	-1.02544	0.0269248	downregulated	-0.0733062	0.883201		-0.82222	0.0403189		0.768663	0.0572525		0.877894	0.0589454		0.467238	0.340231		1.56322	0.000331604	upregulated
ASPWEDRAFT_44719	-1.56935	0.00415136	downregulated	0.653428	0.193111		-0.260685	0.6313		0.347572	0.544948		-0.121794	0.869536		1.21099	0.0239866	upregulated	0.15397	0.848778
ASPWEDRAFT_44804	-8.09186	4.055e-06	downregulated	-0.906087	0.662169		-3.28398	0.0533407		-2.44669	0.198672		2.94274	0.124634		7.73954	4.93802e-06	upregulated	2.97364	0.127744
ASPWEDRAFT_44805	-7.4271	1.12271e-05	downregulated	-0.857591	0.677896		-3.11484	0.0651101		-1.90343	0.327317		2.50555	0.175342		6.75925	3.56056e-05	upregulated	2.54473	0.176304
ASPWEDRAFT_44818	-2.48098	3.65323e-14	downregulated	0.69942	0.043329		-0.596559	0.0787247		0.501125	0.179988		1.8254	7.25103e-08	upregulated	1.45027	1.59627e-05	upregulated	1.81803	9.56847e-08	upregulated
ASPWEDRAFT_44843	-1.37551	0.0431532	downregulated	0.609507	0.362255		-0.314969	0.647732		0.808435	0.231982		0.506767	0.479325		1.27393	0.0408798	upregulated	0.636383	0.380533
ASPWEDRAFT_44855	-3.16202	2.26526e-06	downregulated	0.767786	0.167775		-0.446211	0.443785		0.503992	0.415344		1.87613	0.00999066	upregulated	2.18277	0.00141109	upregulated	2.01932	0.00623459	upregulated
ASPWEDRAFT_450226	-1.00703	0.000949761	downregulated	0.0959288	0.78914		0.457504	0.10984		-0.431076	0.179988		0.590092	0.06475		1.12477	9.30741e-05	upregulated	-0.83195	0.0173131
ASPWEDRAFT_450897	-1.14813	0.000583164	downregulated	-0.267333	0.471929		-0.183061	0.617768		-0.532852	0.134861		-0.155196	0.694917		0.612019	0.0668855		0.211595	0.604402
ASPWEDRAFT_45103	-1.65799	0.00135892	downregulated	-0.757884	0.135156		0.142268	0.802965		0.179602	0.771454		1.22642	0.0196704	upregulated	1.58797	0.00130741	upregulated	1.54147	0.00302656	upregulated
ASPWEDRAFT_45182	-2.8202	0.0103013	downregulated	0.865772	0.455009		-0.034882	0.979971		1.48244	0.19129		1.89569	0.0820549		3.62891	0.000278226	upregulated	2.03379	0.0648461
ASPWEDRAFT_45286	-1.15592	0.0424982	downregulated	0.814727	0.12226		-0.492442	0.362305		-0.848928	0.128449		0.506911	0.393078		1.62281	0.00123646	upregulated	0.232805	0.738144
ASPWEDRAFT_45299	-1.62167	0.0370601	downregulated	-0.673909	0.392162		-0.67612	0.369147		0.358184	0.686994		0.508514	0.536099		-0.347755	0.678128		1.32467	0.0792405
ASPWEDRAFT_45302	-1.41945	0.00123962	downregulated	0.434608	0.340612		-0.968737	0.0181084		-0.256434	0.617627		0.759084	0.0994113		0.979306	0.0234676		0.930388	0.04274
ASPWEDRAFT_45304	-1.22121	0.00208105	downregulated	-0.287951	0.488343		-0.12758	0.764732		-0.410125	0.332382		0.258512	0.586162		0.583722	0.158494		0.548334	0.226546
ASPWEDRAFT_45323	-3.10304	0.00285564	downregulated	1.29799	0.0969367		0.206222	0.822721		0.422802	0.657218		1.84954	0.0980217		2.35998	0.0214146	upregulated	3.1433	0.00231063	upregulated
ASPWEDRAFT_45340	-1.40639	0.000512375	downregulated	-0.274653	0.521636		0.991242	0.00457552		-0.361251	0.410143		0.295906	0.550706		1.40424	0.000306148	upregulated	-1.36269	0.0109754	downregulated
ASPWEDRAFT_45346	-1.01693	0.0281095	downregulated	-0.981873	0.0217833		-0.357136	0.432476		-0.919004	0.0404319		-0.627634	0.18111		0.400115	0.396512		-0.0793578	0.896352
ASPWEDRAFT_45383	-3.27326	3.4474e-10	downregulated	0.0162823	0.973549		-0.681505	0.076964		0.219701	0.636308		-0.297243	0.738874		0.471255	0.517144		-0.592968	0.558012
ASPWEDRAFT_454196	-1.2916	0.00751173	downregulated	-0.302298	0.562796		-0.619425	0.176179		-0.821581	0.09146		-0.525046	0.331748		0.682195	0.16015		0.0361122	0.959415
ASPWEDRAFT_45462	-1.64534	0.000306018	downregulated	0.532489	0.271176		-0.530247	0.253697		-0.897861	0.0601879		1.27903	0.00490743	upregulated	1.16974	0.00870014	upregulated	0.627451	0.213037
ASPWEDRAFT_45621	-1.3974	0.00265602	downregulated	0.135506	0.806703		-0.942606	0.0299911		-0.258645	0.634555		0.296576	0.57884		0.817289	0.0766184		0.283111	0.621556
ASPWEDRAFT_45648	-2.07313	5.34806e-12	downregulated	0.581889	0.0336255		0.287629	0.313814		0.88083	0.00122514		1.82377	6.22301e-09	upregulated	1.19385	0.000194758	upregulated	1.83827	7.83344e-09	upregulated
ASPWEDRAFT_45728	-1.79389	0.000556532	downregulated	-0.403381	0.438617		0.733178	0.107384		-0.136928	0.82292		-0.279913	0.689833		-0.309463	0.644996		-0.847526	0.244283
ASPWEDRAFT_45751	-2.23071	0.00545311	downregulated	1.05717	0.188879		-1.08976	0.157933		0.1535	0.88348		-1.23552	0.146032		0.887623	0.282352		-1.43457	0.0975221
ASPWEDRAFT_45752	-2.51084	0.00231223	downregulated	1.26263	0.119653		-0.823558	0.315007		0.868492	0.327686		-0.478932	0.625897		1.59046	0.0492219	upregulated	-0.608813	0.553729
ASPWEDRAFT_463030	-1.10752	0.000742361	downregulated	-0.388021	0.260987		-0.00929706	0.982941		0.0199029	0.966453		0.492901	0.156399		0.228409	0.534928		1.20432	0.000171164	upregulated
ASPWEDRAFT_46442	-6.41765	4.9517e-23	downregulated	-0.0491968	0.956856		-1.04628	0.136773		-0.00156184	0.999306		2.20029	0.00186485	upregulated	3.33702	5.46889e-07	upregulated	2.63117	0.000181019	upregulated
ASPWEDRAFT_46464	-1.07646	9.39586e-11	downregulated	0.0980591	0.631243		0.127113	0.498239		0.147548	0.466258		0.50678	0.00464307		0.783269	2.7736e-06		0.484899	0.00811861
ASPWEDRAFT_46467	-5.99424	6.48029e-10	downregulated	0.404108	0.748082		-1.72432	0.0887868		0.135541	0.925837		1.55395	0.15541		3.6585	0.000186671	upregulated	1.8247	0.0953184
ASPWEDRAFT_46551	-4.42948	0.0240704	downregulated	1.64169	0.332911		-1.83824	0.262468		-1.59188	0.383593		-1.22819	0.646757		5.6177	0.00140862	upregulated	0.594679	0.833631
ASPWEDRAFT_46953	-3.53829	0.0497996	downregulated	-1.51526	0.205597		-1.22456	0.286813		1.05725	0.330789		5.49155	0.00054938	upregulated	3.17082	0.0615528		3.96989	0.0209463	upregulated
ASPWEDRAFT_47045	-6.03434	0.000320592	downregulated	-0.364361	0.766041		-1.83865	0.0813014		1.11101	0.310948		6.02094	0.000255992	upregulated	3.88208	0.025911	upregulated	5.30988	0.0019094	upregulated
ASPWEDRAFT_47079	-1.15383	0.0165161	downregulated	-0.528356	0.278236		-0.104256	0.847776		-0.773199	0.110697		-0.89214	0.0565082		-0.741675	0.109888		-0.402063	0.448861
ASPWEDRAFT_47365	-1.99678	0.000383689	downregulated	0.505401	0.323705		0.0992139	0.863411		-0.709904	0.196875		1.92406	0.000640524	upregulated	2.37627	6.96154e-06	upregulated	0.593472	0.419248
ASPWEDRAFT_48144	-2.92678	4.42431e-08	downregulated	0.380776	0.549041		0.661522	0.241533		0.753488	0.213813		1.10566	0.0573676		0.998034	0.0803431		0.501681	0.452009
ASPWEDRAFT_48429	-1.53959	0.000934732	downregulated	0.0152888	0.97819		-0.364122	0.422352		0.0420621	0.945237		0.964566	0.049663		0.994234	0.0344773		0.916785	0.0738269
ASPWEDRAFT_48446	-1.16946	0.0112646	downregulated	-0.527775	0.231159		-0.413885	0.341648		0.379029	0.422421		-0.963783	0.0721268		0.0968363	0.868662		-0.576208	0.322002
ASPWEDRAFT_48459	-3.14543	1.13878e-44	downregulated	-0.20967	0.426178		-0.953492	1.65512e-05		0.0251565	0.941829		0.732009	0.00474819		1.00952	3.24618e-05	upregulated	0.763924	0.00372467
ASPWEDRAFT_48539	-2.3488	7.98228e-13	downregulated	-0.0273422	0.942683		-0.233384	0.469606		-0.608709	0.0607143		1.46956	4.19261e-05	upregulated	1.71191	4.10818e-07	upregulated	1.57677	1.39957e-05	upregulated
ASPWEDRAFT_48634	-3.172	5.47047e-06	downregulated	1.3244	0.0628078		-0.314856	0.692417		0.999828	0.190913		0.38217	0.658002		2.47245	0.000313778	upregulated	0.706011	0.403987
ASPWEDRAFT_486969	-1.04084	0.00059813	downregulated	-0.499619	0.103759		-0.85753	0.00250226		0.309199	0.360956		-0.378484	0.259802		-0.719172	0.0182857		0.449013	0.176792
ASPWEDRAFT_487829	-1.21277	0.00147655	downregulated	-0.347601	0.398952		0.289679	0.470148		0.161281	0.732977		0.96873	0.0101523		0.912083	0.0132754		1.64519	5.71666e-06	upregulated
ASPWEDRAFT_489809	-1.94125	0.00352477	downregulated	-0.0484222	0.952738		-0.934468	0.141467		-0.222422	0.782018		0.101569	0.905769		1.64194	0.00960045	upregulated	0.822409	0.260408
[truncated: 76 more rows]

## Sheet: Tables
A. nidulans
[truncated: 51 more rows]
